# Supplementary material for: The damaging character of shallow 20th century earthquakes in the Hainaut coal area (Belgium)
Source: Copernicus journal article supplement (doi:10.5194/se-2021-74), 2021-07-13
Supplement: Supplementary file 1 [file 0_Table S1 - Catalogue_Hainaut_1887_1985.xlsx]

## Sheet: Catalogue_Hainaut_1887_1985_fin
MAP	ID_EARTH	DATE	TIME	REGION	LAT	LON	LOC METHOD	ERRH	DEPTH	ERRZ	ML	MS	Mw_macro	MW	IMAX	PERC.	ERRM	TYPE	N_OBS
	430	1887-02-15	00:--:--.--	HAVRE	50.46	4.05	Single IDP	0.1	[0.2]				0.9		4	0.3 R3	0.5 mac	sup
	431	1887-09-20	06:40:--.--	HAVRE	50.46	4.05	Single IDP	0.5	[0.4]				1.7		4_5	1 R3	0.5 mac	sup
	432	1887-09-30	09:35:--.--	HAVRE	50.46	4.05	Single IDP	0.5	[0.7]				1.8		3_4	1 R3	0.5 mac	sup
	433	1887-10-13	21:--:--.--	HAVRE	50.46	4.05	Single IDP	0.1	[0.2]				0.9		4	0.3 R3	0.5 mac	sup
	434	1887-10-29	21:--:--:--	HAVRE	50.46	4.05	Single IDP	0.5	[0.8]				2.3		4_5	2.2 R3	0.5 mac	sup
	12875	1887-11-19	23:40:--.--	HAVRE	50.46	4.05	Single IDP	0.5	[0.7]				1.8		3_4	1 R3	0.5 mac	sup
	12880	1887-11-27	08:30:--.--	HAVRE	50.46	4.05	Single IDP	0.5	[0.4]				1.7		4_5	1 R3	0.5 mac	sup
	436	1895-04-16	--:--:--.--	OBOURG	50.48	4.03	Geoc. Percept.	2.5	[4.7]	[2.5]			3.3		4_5	8.3 R3	0.6 mac	ke
	438	1904-04-23	16:30:--.--	FLEURUS	50.48	4.55	Single IDP	1	[0.8]				2.1		4	1_2 R3	0.5 mac	sup
	3534	1904-05-14	05:--:--.--	FLEURUS	50.48	4.55	Single IDP	1	[0.8]				2.1		4	1_2 R3	0.5 mac	sup
	3535	1904-05-31	09:--:--.--	FLEURUS	50.48	4.55	Single IDP	1	[0.8]				2.1		4	1_2 R3	0.5 mac	sup
	447	1911-03-29	00:05:43.--	RANSART	50.46	4.47	From main event				3.6			[3.5]	5_6		0.3 M	ke
1	449	1911-04-12	16:15:--.--	CUESMES	50.44	3.92	Geoc. Imax(-1)	1.8	[2.4]	[1.1]			3.1		4	5.4 R3	0.5 mac	ke	22
2	465	1911-06-01	22:51:58.--	RANSART	50.45	4.46	Geoc. Imax(-1)	1.9	4.3	1.8	4.2	3.8		[3.9]	6	13.5 R4	0.3 M	ke	53
3	466	1911-06-03	14:35:54.--	GOSSELIES	50.46	4.45	Geoc. Imax(-1)	0.6	[1.4]	[0.7]	4.4			[4.0]	7	7.7 R4	0.3 M	ke	16
	12885	1911-06-06	03:25:--.--	RANSART	50.46	4.47	From main event						3.1		4		0.5 mac	ke
	467	1911-06-19	20:49:--.--	RANSART	50.46	4.47	From main event						3		3_4		0.5 mac	ke
	468	1911-07-14	04:--:--.--	GOSSELIES	50.46	4.45	From main event						3.3		4_5		0.6 mac	ke
	469	1911-07-23	05:--:--.--	RANSART	50.46	4.47	From main event						2.8		F		0.4 mac	sup
4	476	1920-01-17	03:11:04.--	HORNU	50.44	3.82	Geoc. Imax(-1)	0.8	[1.6]	[0.5]	3.7			[3.5]	6	5.3 R3	0.3 M	ke	12
5	488	1931-05-09	12:25:56.--	HOUDENG-AIMERIES	50.48	4.15	Geoc. Percept.	0.9	[0.6]	[0.2]	2.8			[3.0]	4_5	2.5 R3	0.3 M	ke	5
	489	1931-05-28	15:20:--.--	CHAPELLE-LEZ-HERLAIMONT	50.46	4.28	Geoc. Percept.						2.2		4		0.5 mac	sup
	491	1931-07-14	20:45:--.--	JUMET	50.45	4.42	Geoc. Percept.						3.1		4		0.5 mac	ke
	496	1933-02-11	21:25:--.--	MONS	50.45	3.95	Single IDP						3		3_4		0.5 mac	supp
	497	1933-03-04	22:--:--.--	MONS	50.45	3.95	Single IDP						3		3_4		0.5 mac	ke
	498	1933-03-05	05:28:10.--	MONS	50.45	3.95	Single IDP						3.1		4		0.5 mac	ke
	501	1934-11-12	13:--:--.--	CUESMES	50.44	3.92	Single IDP						3.1		5		0.6 mac	ke
	503	1935-01-14	23:44:--.--	ELOUGES	50.38	3.77	Single IDP						2.8		3		0.4 mac	ke
6	505	1936-11-05	00:41:44.--	GOUY-LEZ-PIETON	50.47	4.3	Geoc. Percept.	0.9	[2.2]	[0.9]			3.3		4_5	3.4 R4	0.6 mac	ke	5
7	517	1940-01-07	16:28:52.--	LA LOUVIERE	50.47	4.17	Geoc. Imax(-1)	0.3	[1.5]	[0.6]			3.5		5	5.6 R3	0.5 mac	ke	17
8	518	1940-01-07	20:32:44.--	LA LOUVIERE	50.47	4.2	Geoc. Imax(-1)	1.9					3.1		4	4.4 R3	0.5 mac	ke	7
9	519	1940-01-09	03:42:07.--	LA LOUVIERE	50.48	4.17	Geoc. Imax(-1)	0.2	[2.8]	[1.4]			3.3		4_5	7.6 R3	0.5 mac	ke	10
	522	1944-03-11	20:53:14.--	CUESMES	50.44	3.92	Single IDP						3.1		4		0.5 mac	ke
	523	1944-03-12	00:45:50.--	CUESMES	50.44	3.92	Single IDP						3.1		4		0.5 mac	ke
	524	1944-03-13	14:23:13.--	CUESMES	50.44	3.92	Single IDP						3.1		4		0.5 mac	ke
	525	1944-03-14	03:19:22.--	CUESMES	50.44	3.92	Single IDP						3.1		4		0.5 mac	ke
	526	1944-03-15	10:19:10.--	CUESMES	50.44	3.92	Single IDP						3.1		4		0.5 mac	ke
	527	1944-03-19	01:56:15.--	CUESMES	50.44	3.92	Single IDP						3.1		4		0.5 mac	ke
	528	1944-03-23	16:21:03.--	CUESMES	50.44	3.92	Single IDP						3.1		4		0.5 mac	ke
	529	1944-03-29	01:00:41.--	CUESMES	50.44	3.92	Single IDP				3			[3.1]	4_5		0.3 M	ke
	530	1946-03-09	19:38:01.--	HAVRE	50.46	4.05	UCC seismic bulletin				3.6			[3.5]	5		0.3 M	ke
	531	1948-12-25	12:06:20.--	HAVRE	50.46	4.05	Single IDP				3.5			[3.4]	5		0.3 M	ke
	532	1948-12-27	16:30:--.--	HAVRE	50.46	4.05	Single IDP						2.8		F		0.4 mac	ke
	533	1949-04-03	12:27:38.--	HAVRE	50.46	4.05	Single IDP				3.9			[3.7]	6		0.3 M	ke
10	534	1949-04-03	12:33:40.--	HAVRE-BOUSSOIT	50.46	4.08	Geoc. Imax(-1)	1.8	2.2	0.8	4.6	4.3		[4.1]	7	18.0 R3	0.3 M	ke	134
	535	1949-04-03	12:53:02.--	HAVRE	50.46	4.05	Single IDP				3			[3.1]	F		0.3 M	ke
	536	1949-04-03	13:05:18.--	HAVRE	50.46	4.05	Single IDP						2.8		F		0.4 mac	ke
	12890	1949-04-03	21:30:--.--	HAVRE	50.46	4.05	Single IDP						2.8		F		0.4 mac	ke
	12895	1949-04-03	22:30:--.--	HAVRE	50.46	4.05	Single IDP						2.8		F		0.4 mac	ke
	12900	1949-04-04	03:40:--.--	HAVRE	50.46	4.05	Single IDP						2.8		F		0.4 mac	ke
	12905	1949-04-06	04:--:--.--	HAVRE	50.46	4.05	Single IDP						2.8		F		0.4 mac	ke
	537	1949-04-09	21:48:--.--	HAVRE	50.46	4.05	Single IDP						3.1		4		0.5 mac	ke
11	538	1949-04-14	01:09:14.--	HAVRE-BOUSSOIT	50.46	4.07	Geoc. Imax(-1)	3	[3.7]	[1.6]			3.5		5	8.5 R3	0.5 mac	ke	15
12	539	1949-04-14	05:12:21.--	HAVRE	50.46	4.06	Geoc. Imax(-1)	1.6	[2.4]	[1.5]	3.8			[3.6]	6	9.5 R3	0.3 M	ke	21
	12910	1949-04-14	05:40:--.--	HAVRE	50.46	4.05	Single IDP						2.8		F		0.4 mac	ke
	12915	1949-04-14	13:50:--.--	HAVRE	50.46	4.05	Single IDP						2.8		F		0.4 mac	ke
	12920	1949-04-14	15:53:--.--	HAVRE	50.46	4.05	Single IDP						2.8		F		0.4 mac	ke
	12925	1949-04-14	16:15:--.--	HAVRE	50.46	4.05	Single IDP						2.8		F		0.4 mac	ke
	2425	1949-05-02	16:56:03.--	HAVRE	50.46	4.05	Single IDP						2.8		F		0.4 mac	ke
	541	1949-05-25	18:59:44.--	HAVRE	50.46	4.05	Single IDP				3.4			[3.4]	4		0.3 M	ke
	546	1952-04-09	21:35:--.--	LA LOUVIERE	50.47	4.17	Single IDP						3		3_4		0.5 mac	ke
13	547	1952-10-21	21:15:--.--	QUAREGNON	50.43	3.88	Geoc. Imax(-1)	2.2	[2.9]	[1.9]			3.1		4	5.5 R3	0.5 mac	ke	21
14	548	1952-10-22	07:--:--.--	FRAMERIES	50.42	3.9	Geoc. Imax(-1)	0.8	[3.0]	[1.0]			2.8		3	3.5 R3	0.4 mac	ke	11
15	549	1952-10-27	06:11:--.--	QUAREGNON	50.43	3.87	Geoc. Imax(-1)	2	3.5	1.2			3.5		5	11.1 R3	0.5 mac	ke	45
	12930	1953-05-21	02:--:--.--	BOUSSOIT	50.46	4.08	Single IDP						3		3_4		0.5 mac	sup
	553	1953-06-11	00:22:21.--	BOUSSOIT	50.46	4.08	Single IDP						3.1		4		0.5 mac	ke
	12935	1953-06-14	01:25:--.--	BOUSSOIT	50.46	4.08	Single IDP						2.8		3		0.4 mac	ke
	557	1953-09-15	23:55:--.--	QUAREGNON	50.45	3.87	Single IDP						3.1		5		0.5 mac	ke
	561	1954-04-05	20:26:43.--	QUAREGNON	50.45	3.87	Single IDP						2.8		F			ke
16	562	1954-07-10	17:18:21.--	FLENU	50.44	3.9	Geoc. Imax(-1)	1.5	3.3	1.2			3.5		5	8.8 R3	0.5 mac	ke	44
	12940	1954-07-11	04:--:--.--	QUAREGNON	50.45	3.87	Single IDP						2.8		F			ke
	563	1955-02-14	02:10:--.--	BOUSSU	50.43	3.8	Single IDP		[0.5]				1.7		4	1 R3	0.5 mac	sup
	564	1955-05-12	20:--:--.--	BOUSSU	50.43	3.8	Single IDP						1.4		3		0.4 mac	sup
	565	1955-05-17	18:--:--.--	BOUSSU	50.43	3.8	Single IDP						1.2		2_3		0.4 mac	sup
	566	1955-05-18	04:50:--.--	BOUSSU	50.43	3.8	Single IDP						1.7		4		0.5 mac	sup
	570	1956-06-24	04:20:--.--	BOUSSU	50.43	3.8	Single IDP						1.7		4		0.5 mac	sup
	12945	1956-06-25	02:15:--.--	BOUSSU	50.43	3.8	Single IDP						1.2		2_3		0.4 mac	sup
	571	1956-07-01	21:55:--.--	BOUSSU	50.43	3.8	Single IDP						1.2		2_3		0.4 mac	sup
	572	1956-11-14	09:30:--.--	HAVRE	50.46	4.05	Single IDP						2.8		3		0.4 mac	ke
	573	1957-01-08	16:12:--.--	BOUSSU	50.43	3.8	Single IDP		[0.4]				2.2		6	3 R3	0.6 mac	sup
	574	1957-01-21	11:00:--.--	MONTIGNIES LE TILLEUL	50.38	4.38	Single IDP		[1.6]				2.4		3	3 R3	0.4 mac	ke
	576	1957-11-21	15:17:--.--	LA LOUVIERE	50.48	4.19	Single IDP						3		3_4	4 R3	0.5 mac	ke
	13045	1957-11-21	15:41:--.--	LA LOUVIERE	50.48	4.19	Single IDP						2.8		3		0.4 mac	ke
	577	1958-05-30	14:45:--.--	HAVRE	50.46	4.05	Single IDP		[0.6]				2.6		6	4 R3	0.6 mac	sup
17	582	1965-12-15	12:07:14.900000	STREPY-BRACQUEGNIES	50.45	4.12	Geoc. Imax(-1)	0.5	2.7	0.8	4.4			4	7	20.7 R3	0.3 M	ke	99
	583	1965-12-15	13:42:01.500000	STREPY-BRACQUEGNIES	50.45	4.12	From main event				2.1			[2.6]	F		0.3 M	ke
	584	1965-12-15	14:02:14.100000	STREPY-BRACQUEGNIES	50.45	4.12	From main event				3.4			3.3	F		0.3 M	ke
	585	1965-12-15	15:16:36.100000	STREPY-BRACQUEGNIES	50.45	4.12	From main event				2.6			[2.9]	F		0.3 M	ke
18	587	1966-01-16	00:13:18.700000	MORLANWELZ-MARIEMONT	50.46	4.24	Geoc. Imax(-1)	1.7	[2.6]	[1.4]	2.7			[2.9]	4	7.2 R3	0.3 M	ke	25
19	588	1966-01-16	06:51:34.500000	MORLANWELZ-MARIEMONT	50.47	4.26	Geoc. Imax(-1)	1.8	3.3	1.6	3.8			3.5	5	8.5 R3	0.3 M	ke	41
20	589	1966-01-16	12:32:50.300000	MORLANWELZ-MARIEMONT	50.46	4.26	Geoc. Imax(-1)	0.6	2.1	0.9	4.4			4	7	24.9 R3	0.3 M	ke	120
	13050	1966-01-17	17:04:21.500000	MORLANWELZ-MARIEMONT	50.46	4.26	From main event						2.8		3		0.4 mac	ke
	13055	1966-01-17	20:28:59.300000	MORLANWELZ-MARIEMONT	50.46	4.26	From main event						2.8		3		0.4 mac	ke
	590	1966-01-24	22:13:20.700000	MORLANWELZ-MARIEMONT	50.46	4.26	From main event				2.6			[2.9]	3		0.3 M	ke
	591	1966-01-26	01:08:44.300000	MORLANWELZ-MARIEMONT	50.46	4.26	From main event				2			[2.5]	3		0.3 M	ke
	13060	1966-03-02	06:50:48.--	MORLANWELZ-MARIEMONT	50.46	4.26	From main event				3			[3.1]	3		0.3 M	ke
	592	1966-03-11	04:09:30.300000	MORLANWELZ-MARIEMONT	50.46	4.26	From main event				3.2			[3.2]			0.3 M	ke
	593	1966-03-16	01:21:30.600000	MORLANWELZ-MARIEMONT	50.46	4.26	From main event				2.8			[3.0]			0.3 M	ke
	594	1966-03-17	18:17:08.300000	MORLANWELZ-MARIEMONT	50.46	4.26	From main event				2.8			[3.0]			0.3 M	ke
	595	1966-03-20	00:08:14.700000	TRAZEGNIES	50.46	4.33	Camelbeeck (1993)				3.8			3.5			0.3 M	ke
	596	1966-03-22	00:20:32.500000	TRAZEGNIES	50.46	4.33	From main event				2			[2.5]			0.3 M	ke
21	597	1967-03-28	15:49:25.100000	CARNIERES	50.46	4.28	Geoc. Imax(-1)	1.3	3	1	4.5			4.1	7	29.3 R3	0.3 M	ke	143
	598	1967-04-04	11:16:26.200000	CARNIERES	50.46	4.28	From main event				2.5			[2.8]			0.3 M	ke
	599	1967-04-04	18:04:44.100000	CARNIERES	50.46	4.28	From main event				3.3			3.3	F		0.3 M	ke
	600	1967-04-08	13:02:05.800000	CARNIERES	50.46	4.28	From main event				2.1			[2.6]			0.3 M	ke
	601	1967-04-09	04:53:48.600000	CARNIERES	50.46	4.28	From main event				2.6			2.9			0.3 M	ke
	602	1967-04-14	14:27:41.100000	CARNIERES	50.46	4.28	From main event				2.1			[2.6]			0.3 M	ke
22	603	1968-08-12	07:26:41.100000	LA LOUVIERE	50.46	4.21	Geoc. Imax(-1)	1.7	2.3	1	3.7			3.6	5	6.7 R3	0.3 M	ke	29
	604	1968-08-13	16:17:28	LA LOUVIERE	50.46	4.21	From main event				3.6			3.6	4_5		0.3 M	ke
	605	1968-08-13	16:40:40.900000	LA LOUVIERE	50.46	4.21	From main event				2.8			3	F		0.3 M	ke
23	606	1968-08-13	16:57:14	LA LOUVIERE	50.46	4.21	Geoc. Imax(-1)	2	2.3	0.8	4.1			3.9	6	11.5 R3	0.3 M	ke	59
	13065	1968-08-13	19:21:11.200000	LA LOUVIERE	50.46	4.21	From main event				2.8			[3.0]			0.3 M	ke
24	607	1968-09-23	04:08:12.600000	MORLANWELZ-MARIEMONT	50.46	4.23	Geoc. Imax(-1)	2	2.8	1.7	3			3.2	5	6.2 R3	0.3 M	ke	25
25	608	1968-09-23	05:47:16	HAINE-SAINT-PIERRE	50.47	4.22	Geoc. Imax(-1)	1.2	[2.4]	[1.1]	2.9			3	4	4.7 R3	0.3 M	ke	25
	611	1970-01-16	23:34:59.100000	FONTAINE-L'EVEQUE	50.41	4.32	UCC seismic bulletin				2.8			3.1	F		0.3 M	ke
26	612	1970-11-03	08:45:59.600000	MARCHIENNE-AU-PONT	50.41	4.41	Geoc. Imax(-1)	1.6	2.3	1	3.9			3.6	5	9.8 R3	0.3 M	ke	31
	613	1970-11-03	12:07:33.380000	MARCHIENNE-AU-PONT	50.41	4.41	From main event				3			3.1	F		0.3 M	ke
	614	1970-12-20	13:48:34.100000	LA LOUVIERE	50.46	4.21	Ahorner (1972)				3.5			3.3	F		0.3 M	ke
27	627	1976-10-24	20:33:28.200000	GIVRY	50.36	4.02	Geoc. Imax(-1)	2.4	5.5	1.7	4.2			[3.9]	6	16.0 R3	0.3 M	ke	95
28	641	1982-09-14	19:24:34.700000	CARNIERES	50.44	4.24	Geoc. Imax(-1)	2	[3.5]	[1.6]	3.4			[3.4]	4	6.9 R3	0.3 M	ke	18
	642	1982-09-14	19:29:09.500000	CARNIERES	50.44	4.24	From main event				2.6			[2.9]	F		0.3 M	ke
	648	1983-08-04	07:08:26.300000	CHARLEROI	50.42	4.45	Geoc. Percept.				3.2			[3.2]	4		0.3 M	ke
	649	1983-08-09	01:32:36.800000	CHARLEROI	50.42	4.45	Geoc. Percept.				3.3			[3.3]	4		0.3 M	ke
																			Total: 1148
		Explanation of the header
		MAP:	Number of the macroseismic map in this Atlas.
		ID_EARTH:	Earthquake ID in the official catalogue of the Royal Observatory of Belgium.
		TIME:	Origin time of earthquakes:
			(a) For earthquakes not recorded by any seismic station, time corresponds to the time of occurrence indicated in the sources reporting the earthquake
			(b) For earthquakes recorded by the seismic station in Uccle, time is precise at one second.
			Time corresponds to the subtraction of an estimated propagation time from the measured P- or S-wave arrival times.
			(c) For earthquakes recorded by many seismic stations, time corresponds to the origin time estimated in the earthquake location (Camelbeeck, 1993).
		LOC METHOD:	Reported epicenters are macroseismic epicenters. This column explains how the epicenters are derived.
			Geoc. Imax(-1): geocenter of the IDPs with Imax and Imax-1 intensities
			Geoc. Percept.: geocenter of all the IDPs
			Single IDP: only one locality clearly reported
			From main event: same location than a main event [used in aftershock sequences and seismic swarms]
			Reference to a publication: [see references in the paper] or mentioned in the UCC seismic bulletin [UCC = Uccle seismic station in Belgium]
		ERRH:	Uncertainty on the reported epicenter in km.
			Uncertainty corresponds to the mean value of (i) the weighted Imax and Imax-1 IDP distribution for large events or (ii) all IDPs for events with few IDPs.
			For Geoc. Imax(-1) events: it corresponds to the mean value of the weighted Imax and Imax-1 IDPs distribution
			For some Geoc. Percept. events with several Imax IDPs: it corresponds to the geocenter
			For the Single IDP events for which a specific study determined the perceptibility area: it corresponds to 1/3 of the perceptibility radius
		DEPTH:	Focal depths (in km) were determined by fitting IDP bins using the Hainaut intensity attenuation law determined in this paper.
			Focal depths [inside brackets] are estimated from Imax, the maximal observed intensity, and the perceptibility radius (see further).
		ERRZ:	Uncertainty (in km) on the reported focal depth derived from fitting the IDPs on the Hainaut intensity attenuation law.
		ML:	Local magnitude determined from recordings of Belgian seismic station (Camelbeeck, 1985a, b)
		MS:	Surface-wave magnitude determined from recordings of European seismic stations using the Prague formula (Karnik, 1969)
		M_macro:	Equivalent moment magnitude determined from macroseismic data using the empirical relationships developed in this study
			(a) For earthquakes estimated deeper than 1 km (type ke): Mw=1.744(±0.13) + 0.346(±0.098).Imax
			(b) For superficial earthquakes (type sup): Mw=0.948(±0.13) + 2. log10(focal depth) + 0.346(±0.098).Imax
			(c) If the macroseismic information only came from a press source that reports that the event was only felt in one locality (Imax: F; Single IDP), M_macro is set to 2.8.
		Mw:	Moment magnitudes determined from Camelbeeck (1985) using coda waves recorded at the seismic station DOU, corrected from Denieul (2014).
			[Moment magnitudes] are determined from ML estimation using the ML - seismic moment relationship of Camelbeeck (1985), modified by Denieul (2014).
		ERRM:	Uncertainty on estimated magnitude:
			(a) '0.3 M' corresponds to uncertainty on instrumental magnitude
			(b) '0.4 mac' corresponds to uncertainty on the magnitude estimated from macroseismic data
		Imax:	Maximal observed intensity
		Perc.:	Radius of perceptibility of the seismic event in km. R3: Radius of Intensity III. R4: Radius of Intensity IV
		Type:	'sup' corresponds to superficial events (focal depth of less than 1 km)
			'ke' corresponds to earthquakes deeper than 1 km
		N	Number of intensity data points available for the event
