# Supplementary material for: The damaging character of shallow 20th century earthquakes in the Hainaut coal area (Belgium)
Source: Copernicus journal article supplement (doi:10.5194/se-2021-74), 2021-07-13
Supplement: Supplementary file 1 [file se-2021-74-supplement.zip]

Archive with 48 entries (48 files):
- 0_Table S1 - Catalogue_Hainaut_1887_1985.xlsx
- 449_1911-04-12_CUESMES.csv
- 465_1911-06-01_RANSART.csv
- 466_1911-06-03_GOSSELIES.csv
- 476_1920-01-17_HORNU.csv
- 488_1931-05-09_HOUDENG-AIMERIES.csv
- 505_1936-11-05_GOUY-LEZ-PIETON.csv
- 517_1940-01-07_LA LOUVIERE.csv
- 518_1940-01-07_LA LOUVIERE.csv
- 519_1940-01-09_LA LOUVIERE.csv
- 534_1949-04-03_HAVRE-BOUSSOIT.csv
- 534_ROB_official_report.pdf
- 538_1949-04-14_HAVRE-BOUSSOIT.csv
- 539_1949-04-14_HAVRE.csv
- 547_1952-10-21_QUAREGNON.csv
- 547_ROB_official_report.pdf
- 548_1952-10-22_FRAMERIES.csv
- 548_ROB_official_report.pdf
- 549_1952-10-27_QUAREGNON.csv
- 549_ROB_official_report.pdf
- 562_1954-07-10_FLENU.csv
- 562_ROB_official_report.pdf
- 582_1965-12-15_STREPY-BRACQUEGNIES.csv
- 582_ROB_official_report.pdf
- 587_1966-01-16_MORLANWELZ-MARIEMONT.csv
- 587_ROB_official_report.pdf
- 588_1966-01-16_MORLANWELZ-MARIEMONT.csv
- 588_ROB_official_report.pdf
- 589_1966-01-16_MORLANWELZ-MARIEMONT.csv
- 589_ROB_official_report.pdf
- 597_1967-03-28_CARNIERES.csv
- 597_ROB_official_report.pdf
- 603_1968-08-12_LA LOUVIERE.csv
- 603_ROB_official_report.pdf
- 606_1968-08-13_LA LOUVIERE.csv
- 606_ROB_official_report.pdf
- 607_1968-09-23_MORLANWELZ-MARIEMONT.csv
- 607_ROB_official_report.pdf
- 608_1968-09-23_HAINE-SAINT-PIERRE.csv
- 608_ROB_official_report.pdf
- 612_1970-11-03_MARCHIENNE-AU-PONT.csv
- 612_ROB_official_report.pdf
- 627_1976-10-24_GIVRY.csv
- 627_ROB_official_report.pdf
- 641_1982-09-14_CARNIERES.csv
- 641_ROB_official_report.pdf
- 651_1983-11-08_LIEGE.csv
- 0_Camelbeecketal_Hainaut seismicity_Atlas.pdf
