# Supplementary material for: The damaging character of shallow 20th century earthquakes in the Hainaut coal area (Belgium)
Source: Copernicus journal article supplement (doi:10.5194/se-2021-74), 2021-07-13
Supplement: Supplementary file 1 [file se-2021-74-supplement.zip › 0_Camelbeecketal_Hainaut seismicity_Atlas.pdf]

# The damaging character of shallow 20<sup>th</sup> century earthquakes in the Hainaut coal area (Belgium)

Thierry Camelbeeck, Koen Van Noten, Thomas Lecocq, and Marc Hendrickx

*Royal Observatory of Belgium, Seismology-Gravimetry, Brussels, Belgium*

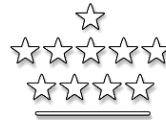

ROYAL OBSERVATORY  
OF BELGIUM

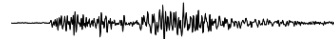

SEISMOLOGY  
GRAVIMETRY

***Supplement:***

***Atlas of macroseismic maps of Hainaut earthquakes,  
1887-1985 seismic catalogue and sources of macroseismic information***

# Overview of seismicity in the Hainaut coal mining area (Belgium)

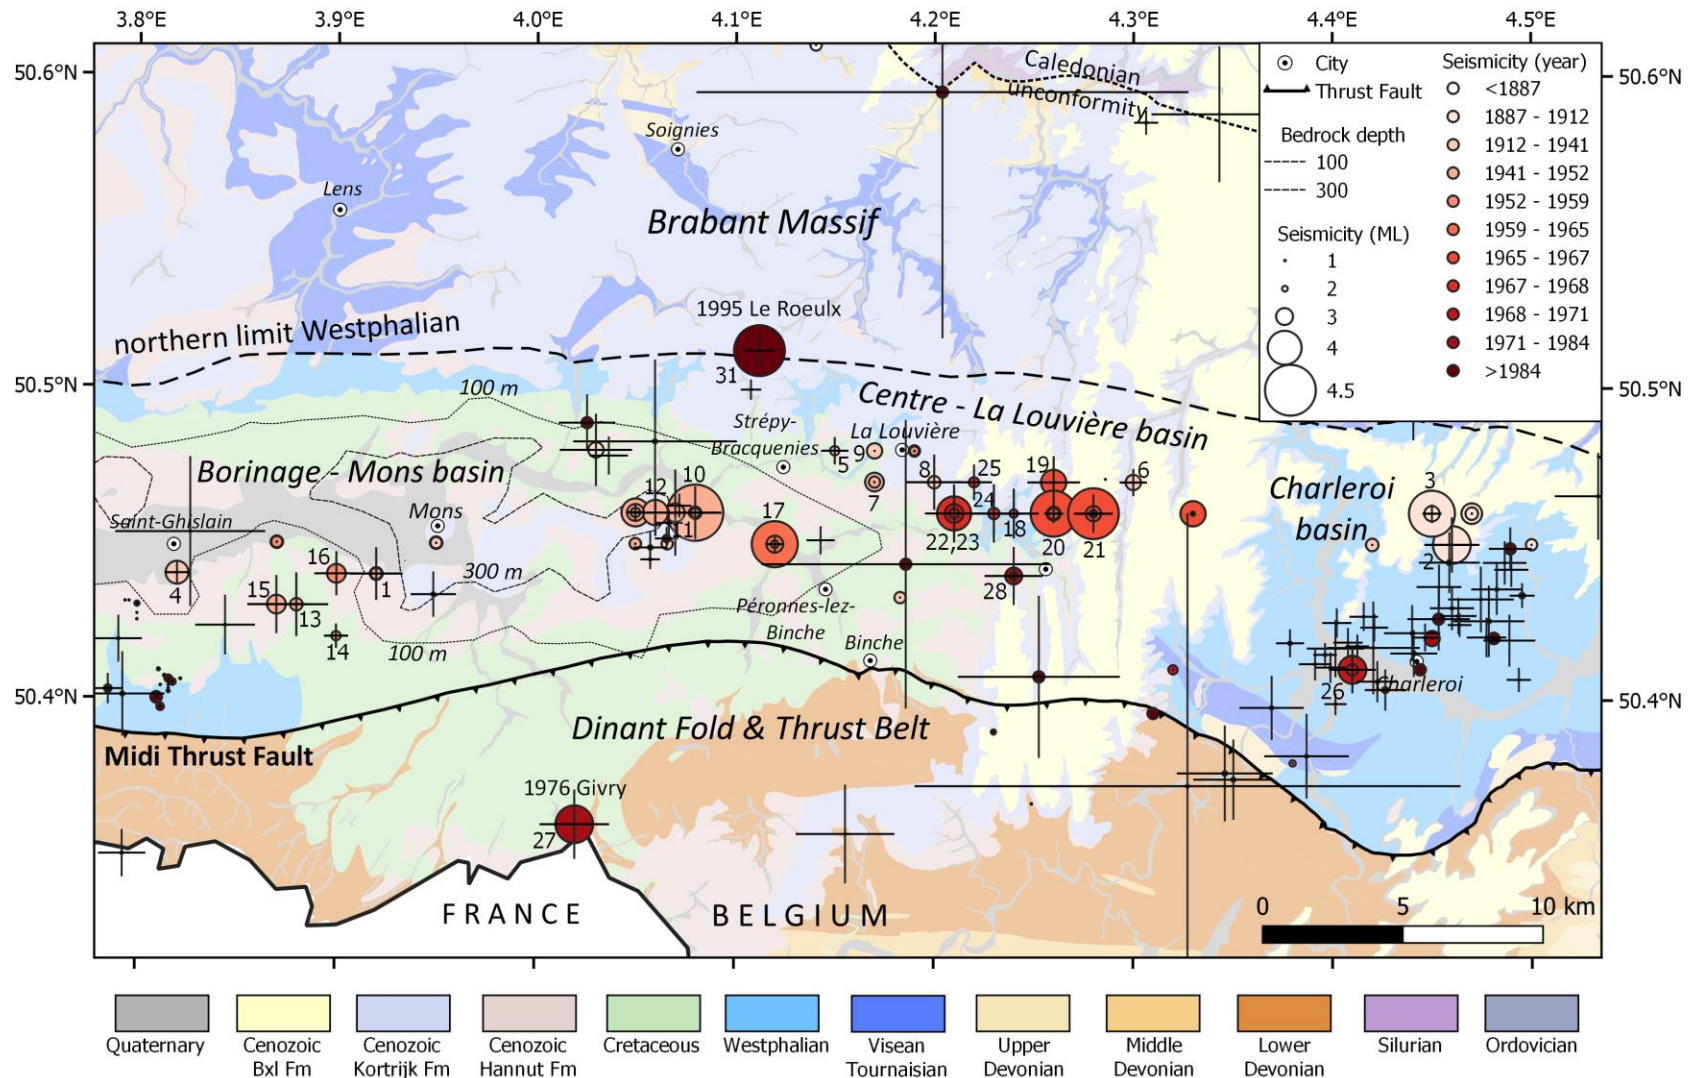

**Figure S0:** Seismicity in the Hainaut coal mining area up to 2020. Numbers 1 to 28 and 31 refer to macroseismic maps in this Atlas. Epicenters of Nr. 29 (1983 Liège) and 30 (1938 Zulzeke-Nukerke) lie outside the borders of the map but are mapped as well. Geology in background based upon <http://www.onegeology.org/>. Reproduced with the permission of OneGeology. All rights Reserved.

*The damaging character of shallow 20<sup>th</sup> century earthquakes in the Hainaut coal area (Belgium)*

# 1. Catalogue of seismicity in the Hainaut coal mining area (Belgium)

**Table S1:** Catalogue information of 123 earthquakes that occurred in the Hainaut coal mining area between 1897 and 1983. The full catalogue of 123 events is also provided as a csv file in the Supplement. The text in below explains the header information of the catalogue on the next pages.

|                           |                                                                                                                                                                                                                                                                                                                                                                                                                                                                                                                                                                                                                                                 |
|---------------------------|-------------------------------------------------------------------------------------------------------------------------------------------------------------------------------------------------------------------------------------------------------------------------------------------------------------------------------------------------------------------------------------------------------------------------------------------------------------------------------------------------------------------------------------------------------------------------------------------------------------------------------------------------|
| <b>MAP:</b>               | Number of the macroseismic map in this Atlas.                                                                                                                                                                                                                                                                                                                                                                                                                                                                                                                                                                                                   |
| <b>ID_EARTH:</b>          | Earthquake ID in the official catalogue of the Royal Observatory of Belgium.                                                                                                                                                                                                                                                                                                                                                                                                                                                                                                                                                                    |
| <b>TIME:</b>              | Origin time of earthquakes:<br>(a) For earthquakes not recorded by any seismic station, time corresponds to the time of occurrence indicated in the sources reporting the earthquake<br>(b) For earthquakes recorded by the seismic station in Uccle, time is precise at one second.<br>Time corresponds to the subtraction of an estimated propagation time from the measured P- or S-wave arrival times.<br>(c) For earthquakes recorded by many seismic stations, time corresponds to the origin time estimated in the earthquake location (Camelbeeck, 1993).                                                                               |
| <b>LOC METHOD:</b>        | Reported epicenters are macroseismic epicenters. This column explains how the epicenters are derived.<br>Geoc. I <sub>max</sub> (-1): geocenter of the IDPs with I <sub>max</sub> and I <sub>max</sub> -1 intensities<br>Geoc. Percept.: geocenter of all the IDPs<br>Single IDP: only one locality clearly reported<br>From main event: same location than a main event [used in aftershock sequences and seismic swarms]<br>Reference to a publication: [see references in the paper] or mentioned in the UCC seismic bulletin [UCC = Uccle seismic station in Belgium]                                                                       |
| <b>ERRH:</b>              | Uncertainty on the reported epicenter in km.<br>Uncertainty corresponds to the mean value of (i) the weighted I <sub>max</sub> and I <sub>max</sub> -1 IDP distribution for large events or (ii) all IDPs for events with few IDPs.<br>For Geoc. I <sub>max</sub> (-1) events: it corresponds to the mean value of the weighted I <sub>max</sub> and I <sub>max</sub> -1 IDPs distribution<br>For some Geoc. Percept. events with several I <sub>max</sub> IDPs: it corresponds to the geocenter<br>For the Single IDP events for which a specific study determined the perceptibility area: it corresponds to 1/3 of the perceptibility radius |
| <b>DEPTH:</b>             | Focal depths (in km) were determined by fitting IDP bins using the Hainaut intensity attenuation law determined in this paper.<br>Focal depths [inside brackets] are estimated from I <sub>max</sub> , the maximal observed intensity, and the perceptibility radius (see further).                                                                                                                                                                                                                                                                                                                                                             |
| <b>ERRZ:</b>              | Uncertainty (in km) on the reported focal depth derived from fitting the IDPs on the Hainaut intensity attenuation law.                                                                                                                                                                                                                                                                                                                                                                                                                                                                                                                         |
| <b>ML:</b>                | Local magnitude determined from recordings of Belgian seismic station (Camelbeeck, 1985a, b)                                                                                                                                                                                                                                                                                                                                                                                                                                                                                                                                                    |
| <b>MS:</b>                | Surface-wave magnitude determined from recordings of European seismic stations using the Prague formula (Karnik, 1969)                                                                                                                                                                                                                                                                                                                                                                                                                                                                                                                          |
| <b>M<sub>macro</sub>:</b> | Equivalent moment magnitude determined from macroseismic data using the empirical relationships developed in this study<br>(a) For earthquakes estimated deeper than 1 km (type ke): $M_w = 1.744(\pm 0.13) + 0.346(\pm 0.098) \cdot I_{max}$<br>(b) For superficial earthquakes (type sup): $M_w = 0.948(\pm 0.13) + 2 \cdot \log_{10}(\text{focal depth}) + 0.346(\pm 0.098) \cdot I_{max}$<br>(c) If the macroseismic information only came from a press source that reports that the event was only felt in one locality (I <sub>max</sub> : F; Single IDP), M <sub>macro</sub> is set to 2.8.                                              |
| <b>M<sub>w</sub>:</b>     | Moment magnitudes determined from Camelbeeck (1985) using coda waves recorded at the seismic station DOU, corrected from Denieul (2014).<br>[Moment magnitudes] are determined from M <sub>L</sub> estimation using the M <sub>L</sub> - seismic moment relationship of Camelbeeck (1985), modified by Denieul (2014).                                                                                                                                                                                                                                                                                                                          |
| <b>ERRM:</b>              | Uncertainty on estimated magnitude:<br>(a) '0.3 M' corresponds to uncertainty on instrumental magnitude<br>(b) '0.4 mac' corresponds to uncertainty on the magnitude estimated from macroseismic data                                                                                                                                                                                                                                                                                                                                                                                                                                           |
| <b>I<sub>max</sub>:</b>   | Maximal observed intensity                                                                                                                                                                                                                                                                                                                                                                                                                                                                                                                                                                                                                      |
| <b>Perc.:</b>             | Radius of perceptibility of the seismic event in km. R3: Radius of Intensity III. R4: Radius of Intensity IV                                                                                                                                                                                                                                                                                                                                                                                                                                                                                                                                    |
| <b>Type:</b>              | 'sup' corresponds to superficial events (focal depth of less than 1 km)<br>'ke' corresponds to earthquakes deeper than 1 km                                                                                                                                                                                                                                                                                                                                                                                                                                                                                                                     |
| <b>N</b>                  | Number of intensity data points available for the event                                                                                                                                                                                                                                                                                                                                                                                                                                                                                                                                                                                         |

# 1. Catalogue of seismicity in the Hainaut coal mining area (Belgium)

**Table S1:** Catalogue information of 123 earthquakes that occurred in the Hainaut coal mining area between 1897 and 1985.

| MAP | ID_EARTH | DATE       | TIME        | REGION                  | LAT   | LON  | LOC METHOD      | ERRH | DEPTH | ERRZ  | ML  | MS  | Mw_macro | MW    | IMAX | PERC.   | ERRM    | TYPE | IDPs |
|-----|----------|------------|-------------|-------------------------|-------|------|-----------------|------|-------|-------|-----|-----|----------|-------|------|---------|---------|------|------|
|     | 430      | 1887-02-15 | 00:--:--:-- | HAVRE                   | 50.46 | 4.05 | Single IDP      | 0.1  | [0.2] |       |     |     | 0.9      |       | 4    | 0.3 R3  | 0.5 mac | sup  |      |
|     | 431      | 1887-09-20 | 06:40:--:-- | HAVRE                   | 50.46 | 4.05 | Single IDP      | 0.5  | [0.4] |       |     |     | 1.7      |       | 4_5  | 1 R3    | 0.5 mac | sup  |      |
|     | 432      | 1887-09-30 | 09:35:--:-- | HAVRE                   | 50.46 | 4.05 | Single IDP      | 0.5  | [0.7] |       |     |     | 1.8      |       | 3_4  | 1 R3    | 0.5 mac | sup  |      |
|     | 433      | 1887-10-13 | 21:--:--:-- | HAVRE                   | 50.46 | 4.05 | Single IDP      | 0.1  | [0.2] |       |     |     | 0.9      |       | 4    | 0.3 R3  | 0.5 mac | sup  |      |
|     | 434      | 1887-10-29 | 21:--:--:-- | HAVRE                   | 50.46 | 4.05 | Single IDP      | 0.5  | [0.8] |       |     |     | 2.3      |       | 4_5  | 2.2 R3  | 0.5 mac | sup  |      |
|     | 12875    | 1887-11-19 | 23:40:--:-- | HAVRE                   | 50.46 | 4.05 | Single IDP      | 0.5  | [0.7] |       |     |     | 1.8      |       | 3_4  | 1 R3    | 0.5 mac | sup  |      |
|     | 12880    | 1887-11-27 | 08:30:--:-- | HAVRE                   | 50.46 | 4.05 | Single IDP      | 0.5  | [0.4] |       |     |     | 1.7      |       | 4_5  | 1 R3    | 0.5 mac | sup  |      |
|     | 436      | 1895-04-16 | --:--:--:-- | OBOURG                  | 50.48 | 4.03 | Geoc. Percept.  | 2.5  | [4.7] | [2.5] |     |     | 3.3      |       | 4_5  | 8.3 R3  | 0.6 mac | ke   |      |
|     | 438      | 1904-04-23 | 16:30:--:-- | FLEURUS                 | 50.48 | 4.55 | Single IDP      | 1.0  | [0.8] |       |     |     | 2.1      |       | 4    | 1_2 R3  | 0.5 mac | sup  |      |
|     | 3534     | 1904-05-14 | 05:--:--:-- | FLEURUS                 | 50.48 | 4.55 | Single IDP      | 1.0  | [0.8] |       |     |     | 2.1      |       | 4    | 1_2 R3  | 0.5 mac | sup  |      |
|     | 3535     | 1904-05-31 | 09:--:--:-- | FLEURUS                 | 50.48 | 4.55 | Single IDP      | 1.0  | [0.8] |       |     |     | 2.1      |       | 4    | 1_2 R3  | 0.5 mac | sup  |      |
|     | 447      | 1911-03-29 | 00:05:43.-- | RANSART                 | 50.46 | 4.47 | From main event |      |       |       | 3.6 |     |          | [3.5] | 5_6  |         | 0.3 M   | ke   |      |
| 1   | 449      | 1911-04-12 | 16:15:--:-- | CUESMES                 | 50.44 | 3.92 | Geoc. lmax(-1)  | 1.8  | [2.4] | [1.1] |     |     | 3.1      |       | 4    | 5.4 R3  | 0.5 mac | ke   | 22   |
| 2   | 465      | 1911-06-01 | 22:51:58.-- | RANSART                 | 50.45 | 4.46 | Geoc. lmax(-1)  | 1.9  | 4.3   | 1.8   | 4.2 | 3.8 |          | [3.9] | 6    | 13.5 R4 | 0.3 M   | ke   | 53   |
| 3   | 466      | 1911-06-03 | 14:35:54.-- | GOSSELIES               | 50.46 | 4.45 | Geoc. lmax(-1)  | 0.6  | [1.4] | [0.7] | 4.4 |     |          | [4.0] | 7    | 7.7 R4  | 0.3 M   | ke   | 16   |
|     | 12885    | 1911-06-06 | 03:25:--:-- | RANSART                 | 50.46 | 4.47 | From main event |      |       |       |     |     | 3.1      |       | 4    |         | 0.5 mac | ke   |      |
|     | 467      | 1911-06-19 | 20:49:--:-- | RANSART                 | 50.46 | 4.47 | From main event |      |       |       |     |     | 3        |       | 3_4  |         | 0.5 mac | ke   |      |
|     | 468      | 1911-07-14 | 04:--:--:-- | GOSSELIES               | 50.46 | 4.45 | From main event |      |       |       |     |     | 3.3      |       | 4_5  |         | 0.6 mac | ke   |      |
|     | 469      | 1911-07-23 | 05:--:--:-- | RANSART                 | 50.46 | 4.47 | From main event |      |       |       |     |     | 2.8      |       | F    |         | 0.4 mac | sup  |      |
| 4   | 476      | 1920-01-17 | 03:11:04.-- | HORNU                   | 50.44 | 3.82 | Geoc. lmax(-1)  | 0.8  | [1.6] | [0.5] | 3.7 |     |          | [3.5] | 6    | 5.3 R3  | 0.3 M   | ke   | 12   |
| 5   | 488      | 1931-05-09 | 12:25:56.-- | HOUDENG-AIMERIES        | 50.48 | 4.15 | Geoc. Percept.  | 0.9  | [0.6] | [0.2] | 2.8 |     |          | [3.0] | 4_5  | 2.5 R3  | 0.3 M   | ke   | 5    |
|     | 489      | 1931-05-28 | 15:20:--:-- | CHAPELLE-LEZ-HERLAIMONT | 50.46 | 4.28 | Geoc. Percept.  |      |       |       |     |     | 2.2      |       | 4    |         | 0.5 mac | sup  |      |
|     | 491      | 1931-07-14 | 20:45:--:-- | JUMET                   | 50.45 | 4.42 | Geoc. Percept.  |      |       |       |     |     | 3.1      |       | 4    |         | 0.5 mac | ke   |      |
|     | 496      | 1933-02-11 | 21:25:--:-- | MONS                    | 50.45 | 3.95 | Single IDP      |      |       |       |     |     | 3.0      |       | 3_4  |         | 0.5 mac | supp |      |
|     | 497      | 1933-03-04 | 22:--:--:-- | MONS                    | 50.45 | 3.95 | Single IDP      |      |       |       |     |     | 3.0      |       | 3_4  |         | 0.5 mac | ke   |      |
|     | 498      | 1933-03-05 | 05:28:10.-- | MONS                    | 50.45 | 3.95 | Single IDP      |      |       |       |     |     | 3.1      |       | 4    |         | 0.5 mac | ke   |      |
|     | 501      | 1934-11-12 | 13:--:--:-- | CUESMES                 | 50.44 | 3.92 | Single IDP      |      |       |       |     |     | 3.1      |       | 5    |         | 0.6 mac | ke   |      |
|     | 503      | 1935-01-14 | 23:44:--:-- | ELOUGES                 | 50.38 | 3.77 | Single IDP      |      |       |       |     |     | 2.8      |       | 3    |         | 0.4 mac | ke   |      |
| 6   | 505      | 1936-11-05 | 00:41:44.-- | GOUY-LEZ-PIETON         | 50.47 | 4.30 | Geoc. Percept.  | 0.9  | [2.2] | [0.9] |     |     | 3.3      |       | 4_5  | 3.4 R4  | 0.6 mac | ke   | 5    |
| 7   | 517      | 1940-01-07 | 16:28:52.-- | LA LOUVIERE             | 50.47 | 4.17 | Geoc. lmax(-1)  | 0.3  | [1.5] | [0.6] |     |     | 3.5      |       | 5    | 5.6 R3  | 0.5 mac | ke   | 17   |
| 8   | 518      | 1940-01-07 | 20:32:44.-- | LA LOUVIERE             | 50.47 | 4.20 | Geoc. lmax(-1)  | 1.9  |       |       |     |     | 3.1      |       | 4    | 4.4 R3  | 0.5 mac | ke   | 7    |
| 9   | 519      | 1940-01-09 | 03:42:07.-- | LA LOUVIERE             | 50.48 | 4.17 | Geoc. lmax(-1)  | 0.2  | [2.8] | [1.4] |     |     | 3.3      |       | 4_5  | 7.6 R3  | 0.5 mac | ke   | 10   |
|     | 522      | 1944-03-11 | 20:53:14.-- | CUESMES                 | 50.44 | 3.92 | Single IDP      |      |       |       |     |     | 3.1      |       | 4    |         | 0.5 mac | ke   |      |
|     | 523      | 1944-03-12 | 00:45:50.-- | CUESMES                 | 50.44 | 3.92 | Single IDP      |      |       |       |     |     | 3.1      |       | 4    |         | 0.5 mac | ke   |      |
|     | 524      | 1944-03-13 | 14:23:13.-- | CUESMES                 | 50.44 | 3.92 | Single IDP      |      |       |       |     |     | 3.1      |       | 4    |         | 0.5 mac | ke   |      |
|     | 525      | 1944-03-14 | 03:19:22.-- | CUESMES                 | 50.44 | 3.92 | Single IDP      |      |       |       |     |     | 3.1      |       | 4    |         | 0.5 mac | ke   |      |
|     | 526      | 1944-03-15 | 10:19:10.-- | CUESMES                 | 50.44 | 3.92 | Single IDP      |      |       |       |     |     | 3.1      |       | 4    |         | 0.5 mac | ke   |      |

*The damaging character of shallow 20<sup>th</sup> century earthquakes in the Hainaut coal area (Belgium)*

# 1. Catalogue of seismicity in the Hainaut coal mining area (Belgium)

**Table S1:** Catalogue information of 123 earthquakes that occurred in the Hainaut coal mining area between 1897 and 1985 (continuation).

| MAP | ID_EARTH | DATE       | TIME        | REGION         | LAT   | LON  | LOC METHOD           | ERRH | DEPTH | ERRZ  | ML  | MS  | Mw_macro | MW    | IMAX | PERC.   | ERRM    | TYPE | N   |
|-----|----------|------------|-------------|----------------|-------|------|----------------------|------|-------|-------|-----|-----|----------|-------|------|---------|---------|------|-----|
|     | 527      | 1944-03-19 | 01:56:15.-- | CUESMES        | 50.44 | 3.92 | Single IDP           |      |       |       |     |     | 3.1      |       | 4    |         | 0.5 mac | ke   |     |
|     | 528      | 1944-03-23 | 16:21:03.-- | CUESMES        | 50.44 | 3.92 | Single IDP           |      |       |       |     |     | 3.1      |       | 4    |         | 0.5 mac | ke   |     |
|     | 529      | 1944-03-29 | 01:00:41.-- | CUESMES        | 50.44 | 3.92 | Single IDP           |      |       |       | 3.0 |     |          | [3.1] | 4_5  |         | 0.3 M   | ke   |     |
|     | 530      | 1946-03-09 | 19:38:01.-- | HAVRE          | 50.46 | 4.05 | UCC seismic bulletin |      |       |       | 3.6 |     |          | [3.5] | 5    |         | 0.3 M   | ke   |     |
|     | 531      | 1948-12-25 | 12:06:20.-- | HAVRE          | 50.46 | 4.05 | Single IDP           |      |       |       | 3.5 |     |          | [3.4] | 5    |         | 0.3 M   | ke   |     |
|     | 532      | 1948-12-27 | 16:30:--.-- | HAVRE          | 50.46 | 4.05 | Single IDP           |      |       |       |     |     | 2.8      |       | F    |         | 0.4 mac | ke   |     |
|     | 533      | 1949-04-03 | 12:27:38.-- | HAVRE          | 50.46 | 4.05 | Single IDP           |      |       |       | 3.9 |     |          | [3.7] | 6    |         | 0.3 M   | ke   |     |
| 10  | 534      | 1949-04-03 | 12:33:40.-- | HAVRE-BOUSSOIT | 50.46 | 4.08 | Geoc. lmax(-1)       | 1.8  | 2.2   | 0.8   | 4.6 | 4.3 |          | [4.1] | 7    | 18.0 R3 | 0.3 M   | ke   | 134 |
|     | 535      | 1949-04-03 | 12:53:02.-- | HAVRE          | 50.46 | 4.05 | Single IDP           |      |       |       | 3.0 |     |          | [3.1] | F    |         | 0.3 M   | ke   |     |
|     | 536      | 1949-04-03 | 13:05:18.-- | HAVRE          | 50.46 | 4.05 | Single IDP           |      |       |       |     |     | 2.8      |       | F    |         | 0.4 mac | ke   |     |
|     | 12890    | 1949-04-03 | 21:30:--.-- | HAVRE          | 50.46 | 4.05 | Single IDP           |      |       |       |     |     | 2.8      |       | F    |         | 0.4 mac | ke   |     |
|     | 12895    | 1949-04-03 | 22:30:--.-- | HAVRE          | 50.46 | 4.05 | Single IDP           |      |       |       |     |     | 2.8      |       | F    |         | 0.4 mac | ke   |     |
|     | 12900    | 1949-04-04 | 03:40:--.-- | HAVRE          | 50.46 | 4.05 | Single IDP           |      |       |       |     |     | 2.8      |       | F    |         | 0.4 mac | ke   |     |
|     | 12905    | 1949-04-06 | 04:--:--.-- | HAVRE          | 50.46 | 4.05 | Single IDP           |      |       |       |     |     | 2.8      |       | F    |         | 0.4 mac | ke   |     |
|     | 537      | 1949-04-09 | 21:48:--.-- | HAVRE          | 50.46 | 4.05 | Single IDP           |      |       |       |     |     | 3.1      |       | 4    |         | 0.5 mac | ke   |     |
| 11  | 538      | 1949-04-14 | 01:09:14.-- | HAVRE-BOUSSOIT | 50.46 | 4.07 | Geoc. lmax(-1)       | 3.0  | [3.7] | [1.6] |     |     | 3.5      |       | 5    | 8.5 R3  | 0.5 mac | ke   | 15  |
| 12  | 539      | 1949-04-14 | 05:12:21.-- | HAVRE          | 50.46 | 4.06 | Geoc. lmax(-1)       | 1.6  | [2.4] | [1.5] | 3.8 |     |          | [3.6] | 6    | 9.5 R3  | 0.3 M   | ke   | 21  |
|     | 12910    | 1949-04-14 | 05:40:--.-- | HAVRE          | 50.46 | 4.05 | Single IDP           |      |       |       |     |     | 2.8      |       | F    |         | 0.4 mac | ke   |     |
|     | 12915    | 1949-04-14 | 13:50:--.-- | HAVRE          | 50.46 | 4.05 | Single IDP           |      |       |       |     |     | 2.8      |       | F    |         | 0.4 mac | ke   |     |
|     | 12920    | 1949-04-14 | 15:53:--.-- | HAVRE          | 50.46 | 4.05 | Single IDP           |      |       |       |     |     | 2.8      |       | F    |         | 0.4 mac | ke   |     |
|     | 12925    | 1949-04-14 | 16:15:--.-- | HAVRE          | 50.46 | 4.05 | Single IDP           |      |       |       |     |     | 2.8      |       | F    |         | 0.4 mac | ke   |     |
|     | 2425     | 1949-05-02 | 16:56:03.-- | HAVRE          | 50.46 | 4.05 | Single IDP           |      |       |       |     |     | 2.8      |       | F    |         | 0.4 mac | ke   |     |
|     | 541      | 1949-05-25 | 18:59:44.-- | HAVRE          | 50.46 | 4.05 | Single IDP           |      |       |       | 3.4 |     |          | [3.4] | 4    |         | 0.3 M   | ke   |     |
|     | 546      | 1952-04-09 | 21:35:--.-- | LA LOUVIERE    | 50.47 | 4.17 | Single IDP           |      |       |       |     |     | 3.0      |       | 3_4  |         | 0.5 mac | ke   |     |
| 13  | 547      | 1952-10-21 | 21:15:--.-- | QUAREGNON      | 50.43 | 3.88 | Geoc. lmax(-1)       | 2.2  | [2.9] | [1.9] |     |     | 3.1      |       | 4    | 5.5 R3  | 0.5 mac | ke   | 21  |
| 14  | 548      | 1952-10-22 | 07:--:--.-- | FRAMERIES      | 50.42 | 3.90 | Geoc. lmax(-1)       | 0.8  | [3.0] | [1.0] |     |     | 2.8      |       | 3    | 3.5 R3  | 0.4 mac | ke   | 11  |
| 15  | 549      | 1952-10-27 | 06:11:--.-- | QUAREGNON      | 50.43 | 3.87 | Geoc. lmax(-1)       | 2.0  | 3.5   | 1.2   |     |     | 3.5      |       | 5    | 11.1 R3 | 0.5 mac | ke   | 45  |
|     | 12930    | 1953-05-21 | 02:--:--.-- | BOUSSOIT       | 50.46 | 4.08 | Single IDP           |      |       |       |     |     | 3.0      |       | 3_4  |         | 0.5 mac | sup  |     |
|     | 553      | 1953-06-11 | 00:22:21.-- | BOUSSOIT       | 50.46 | 4.08 | Single IDP           |      |       |       |     |     | 3.1      |       | 4    |         | 0.5 mac | ke   |     |
|     | 12935    | 1953-06-14 | 01:25:--.-- | BOUSSOIT       | 50.46 | 4.08 | Single IDP           |      |       |       |     |     | 2.8      |       | 3    |         | 0.4 mac | ke   |     |
|     | 557      | 1953-09-15 | 23:55:--.-- | QUAREGNON      | 50.45 | 3.87 | Single IDP           |      |       |       |     |     | 3.1      |       | 5    |         | 0.5 mac | ke   |     |
|     | 561      | 1954-04-05 | 20:26:43.-- | QUAREGNON      | 50.45 | 3.87 | Single IDP           |      |       |       |     |     | 2.8      |       | F    |         | 0.4 mac | ke   |     |
| 16  | 562      | 1954-07-10 | 17:18:21.-- | FLENU          | 50.44 | 3.90 | Geoc. lmax(-1)       | 1.5  | 3.3   | 1.2   |     |     | 3.5      |       | 5    | 8.8 R3  | 0.5 mac | ke   | 44  |
|     | 12940    | 1954-07-11 | 04:--:--.-- | QUAREGNON      | 50.45 | 3.87 | Single IDP           |      |       |       |     |     | 2.8      |       | F    |         | 0.4 mac | ke   |     |
|     | 563      | 1955-02-14 | 02:10:--.-- | BOUSSU         | 50.43 | 3.80 | Single IDP           |      |       | [0.5] |     |     | 1.7      |       | 4    | 1 R3    | 0.5 mac | sup  |     |
|     | 564      | 1955-05-12 | 20:--:--.-- | BOUSSU         | 50.43 | 3.80 | Single IDP           |      |       |       |     |     | 1.4      |       | 3    |         | 0.4 mac | sup  |     |
|     | 565      | 1955-05-17 | 18:--:--.-- | BOUSSU         | 50.43 | 3.80 | Single IDP           |      |       |       |     |     | 1.2      |       | 2_3  |         | 0.4 mac | sup  |     |

*The damaging character of shallow 20<sup>th</sup> century earthquakes in the Hainaut coal area (Belgium)*

# 1. Catalogue of seismicity in the Hainaut coal mining area (Belgium)

**Table S1:** Catalogue information of 123 earthquakes that occurred in the Hainaut coal mining area between 1897 and 1985 (continuation).

| MAP | ID_EARTH | DATE       | TIME        | REGION                | LAT   | LON  | LOC METHOD        | ERRH | DEPTH | ERRZ  | ML  | MS | Mw_macro | MW    | IMAX | PERC.   | ERRM    | TYPE | N   |
|-----|----------|------------|-------------|-----------------------|-------|------|-------------------|------|-------|-------|-----|----|----------|-------|------|---------|---------|------|-----|
|     | 566      | 1955-05-18 | 04:50:--    | BOUSSU                | 50.43 | 3.80 | Single IDP        |      |       |       |     |    | 1.7      |       | 4    |         | 0.5 mac | sup  |     |
|     | 570      | 1956-06-24 | 04:20:--    | BOUSSU                | 50.43 | 3.80 | Single IDP        |      |       |       |     |    | 1.7      |       | 4    |         | 0.5 mac | sup  |     |
|     | 12945    | 1956-06-25 | 02:15:--    | BOUSSU                | 50.43 | 3.80 | Single IDP        |      |       |       |     |    | 1.2      |       | 2_3  |         | 0.4 mac | sup  |     |
|     | 571      | 1956-07-01 | 21:55:--    | BOUSSU                | 50.43 | 3.80 | Single IDP        |      |       |       |     |    | 1.2      |       | 2_3  |         | 0.4 mac | sup  |     |
|     | 572      | 1956-11-14 | 09:30:--    | HAVRE                 | 50.46 | 4.05 | Single IDP        |      |       |       |     |    | 2.8      |       | 3    |         | 0.4 mac | ke   |     |
|     | 573      | 1957-01-08 | 16:12:--    | BOUSSU                | 50.43 | 3.80 | Single IDP        |      | [0.4] |       |     |    | 2.2      |       | 6    | 3 R3    | 0.6 mac | sup  |     |
|     | 574      | 1957-01-21 | 11:00:--    | MONTIGNIES LE TILLEUL | 50.38 | 4.38 | Single IDP        |      | [1.6] |       |     |    | 2.4      |       | 3    | 3 R3    | 0.4 mac | ke   |     |
|     | 576      | 1957-11-21 | 15:17:--    | LA LOUVIERE           | 50.48 | 4.19 | Single IDP        |      |       |       |     |    | 3.0      |       | 3_4  | 4 R3    | 0.5 mac | ke   |     |
|     | 13045    | 1957-11-21 | 15:41:--    | LA LOUVIERE           | 50.48 | 4.19 | Single IDP        |      |       |       |     |    | 2.8      |       | 3    |         | 0.4 mac | ke   |     |
|     | 577      | 1958-05-30 | 14:45:--    | HAVRE                 | 50.46 | 4.05 | Single IDP        |      | [0.6] |       |     |    | 2.6      |       | 6    | 4 R3    | 0.6 mac | sup  |     |
| 17  | 582      | 1965-12-15 | 12:07:14.9  | STREPY-BRACQUEGNIES   | 50.45 | 4.12 | Geoc. Imax(-1)    | 0.5  | 2.7   | 0.8   | 4.4 |    |          | 4.0   | 7    | 20.7 R3 | 0.3 M   | ke   | 99  |
|     | 583      | 1965-12-15 | 13:42:01.5  | STREPY-BRACQUEGNIES   | 50.45 | 4.12 | From main event   |      |       |       | 2.1 |    |          | [2.6] | F    |         | 0.3 M   | ke   |     |
|     | 584      | 1965-12-15 | 14:02:14.1  | STREPY-BRACQUEGNIES   | 50.45 | 4.12 | From main event   |      |       |       | 3.4 |    |          | 3.3   | F    |         | 0.3 M   | ke   |     |
|     | 585      | 1965-12-15 | 15:16:36.1  | STREPY-BRACQUEGNIES   | 50.45 | 4.12 | From main event   |      |       |       | 2.6 |    |          | [2.9] | F    |         | 0.3 M   | ke   |     |
| 18  | 587      | 1966-01-16 | 00:13:18.7  | MORLANWELZ-MARIEMONT  | 50.46 | 4.24 | Geoc. Imax(-1)    | 1.7  | [2.6] | [1.4] | 2.7 |    |          | [2.9] | 4    | 7.2 R3  | 0.3 M   | ke   | 25  |
| 19  | 588      | 1966-01-16 | 06:51:34.5  | MORLANWELZ-MARIEMONT  | 50.47 | 4.26 | Geoc. Imax(-1)    | 1.8  | 3.3   | 1.6   | 3.8 |    |          | 3.5   | 5    | 8.5 R3  | 0.3 M   | ke   | 41  |
| 20  | 589      | 1966-01-16 | 12:32:50.3  | MORLANWELZ-MARIEMONT  | 50.46 | 4.26 | Geoc. Imax(-1)    | 0.6  | 2.1   | 0.9   | 4.4 |    |          | 4.0   | 7    | 24.9 R3 | 0.3 M   | ke   | 120 |
|     | 13050    | 1966-01-17 | 17:04:21.5  | MORLANWELZ-MARIEMONT  | 50.46 | 4.26 | From main event   |      |       |       |     |    | 2.8      |       | 3    |         | 0.4 mac | ke   |     |
|     | 13055    | 1966-01-17 | 20:28:59.3  | MORLANWELZ-MARIEMONT  | 50.46 | 4.26 | From main event   |      |       |       |     |    | 2.8      |       | 3    |         | 0.4 mac | ke   |     |
|     | 590      | 1966-01-24 | 22:13:20.7  | MORLANWELZ-MARIEMONT  | 50.46 | 4.26 | From main event   |      |       |       | 2.6 |    |          | [2.9] | 3    |         | 0.3 M   | ke   |     |
|     | 591      | 1966-01-26 | 01:08:44.3  | MORLANWELZ-MARIEMONT  | 50.46 | 4.26 | From main event   |      |       |       | 2.0 |    |          | [2.5] | 3    |         | 0.3 M   | ke   |     |
|     | 13060    | 1966-03-02 | 06:50:48.-- | MORLANWELZ-MARIEMONT  | 50.46 | 4.26 | From main event   |      |       |       | 3.0 |    |          | [3.1] | 3    |         | 0.3 M   | ke   |     |
|     | 592      | 1966-03-11 | 04:09:30.3  | MORLANWELZ-MARIEMONT  | 50.46 | 4.26 | From main event   |      |       |       | 3.2 |    |          | [3.2] |      |         | 0.3 M   | ke   |     |
|     | 593      | 1966-03-16 | 01:21:30.6  | MORLANWELZ-MARIEMONT  | 50.46 | 4.26 | From main event   |      |       |       | 2.8 |    |          | [3.0] |      |         | 0.3 M   | ke   |     |
|     | 594      | 1966-03-17 | 18:17:08.3  | MORLANWELZ-MARIEMONT  | 50.46 | 4.26 | From main event   |      |       |       | 2.8 |    |          | [3.0] |      |         | 0.3 M   | ke   |     |
|     | 595      | 1966-03-20 | 00:08:14.7  | TRAZEGNIES            | 50.46 | 4.33 | Camelbeeck (1993) |      |       |       | 3.8 |    |          | 3.5   |      |         | 0.3 M   | ke   |     |
|     | 596      | 1966-03-22 | 00:20:32.5  | TRAZEGNIES            | 50.46 | 4.33 | From main event   |      |       |       | 2.0 |    |          | [2.5] |      |         | 0.3 M   | ke   |     |
| 21  | 597      | 1967-03-28 | 15:49:25.1  | CARNIERES             | 50.46 | 4.28 | Geoc. Imax(-1)    | 1.3  | 3.0   | 1.0   | 4.5 |    |          | 4.1   | 7    | 29.3 R3 | 0.3 M   | ke   | 143 |
|     | 598      | 1967-04-04 | 11:16:26.2  | CARNIERES             | 50.46 | 4.28 | From main event   |      |       |       | 2.5 |    |          | [2.8] |      |         | 0.3 M   | ke   |     |
|     | 599      | 1967-04-04 | 18:04:44.1  | CARNIERES             | 50.46 | 4.28 | From main event   |      |       |       | 3.3 |    |          | 3.3   | F    |         | 0.3 M   | ke   |     |
|     | 600      | 1967-04-08 | 13:02:05.8  | CARNIERES             | 50.46 | 4.28 | From main event   |      |       |       | 2.1 |    |          | [2.6] |      |         | 0.3 M   | ke   |     |
|     | 601      | 1967-04-09 | 04:53:48.6  | CARNIERES             | 50.46 | 4.28 | From main event   |      |       |       | 2.6 |    |          | 2.9   |      |         | 0.3 M   | ke   |     |
|     | 602      | 1967-04-14 | 14:27:41.1  | CARNIERES             | 50.46 | 4.28 | From main event   |      |       |       | 2.1 |    |          | [2.6] |      |         | 0.3 M   | ke   |     |
| 22  | 603      | 1968-08-12 | 07:26:41.1  | LA LOUVIERE           | 50.46 | 4.21 | Geoc. Imax(-1)    | 1.7  | 2.3   | 1.0   | 3.7 |    |          | 3.6   | 5    | 6.7 R3  | 0.3 M   | ke   | 29  |
|     | 604      | 1968-08-13 | 16:17:28.0  | LA LOUVIERE           | 50.46 | 4.21 | From main event   |      |       |       | 3.6 |    |          | 3.6   | 4_5  |         | 0.3 M   | ke   |     |
|     | 605      | 1968-08-13 | 16:40:40.9  | LA LOUVIERE           | 50.46 | 4.21 | From main event   |      |       |       | 2.8 |    |          | 3.0   | F    |         | 0.3 M   | ke   |     |

# 1. Catalogue of seismicity in the Hainaut coal mining area (Belgium)

**Table S1:** Catalogue information of 123 earthquakes that occurred in the Hainaut coal mining area between 1897 and 1985 (continuation).

| MAP | ID_EARTH | DATE       | TIME       | REGION               | LAT   | LON  | LOC METHOD           | ERRH | DEPTH | ERRZ  | ML  | MS | Mw_macro | MW    | IMAX | PERC.   | ERRM  | TYPE | N  |
|-----|----------|------------|------------|----------------------|-------|------|----------------------|------|-------|-------|-----|----|----------|-------|------|---------|-------|------|----|
| 23  | 606      | 1968-08-13 | 16:57:14.0 | LA LOUVIERE          | 50.46 | 4.21 | Geoc. Imax(-1)       | 2.0  | 2.3   | 0.8   | 4.1 |    |          | 3.9   | 6    | 11.5 R3 | 0.3 M | ke   | 59 |
|     | 13065    | 1968-08-13 | 19:21:11.2 | LA LOUVIERE          | 50.46 | 4.21 | From main event      |      |       |       | 2.8 |    |          | [3.0] |      |         | 0.3 M | ke   |    |
| 24  | 607      | 1968-09-23 | 04:08:12.6 | MORLANWELZ-MARIEMONT | 50.46 | 4.23 | Geoc. Imax(-1)       | 2.0  | 2.8   | 1.7   | 3.0 |    |          | 3.2   | 5    | 6.2 R3  | 0.3 M | ke   | 25 |
| 25  | 608      | 1968-09-23 | 05:47:16.0 | HAINE-SAINT-PIERRE   | 50.47 | 4.22 | Geoc. Imax(-1)       | 1.2  | [2.4] | [1.1] | 2.9 |    |          | 3.0   | 4    | 4.7 R3  | 0.3 M | ke   | 25 |
|     | 611      | 1970-01-16 | 23:34:59.1 | FONTAINE-L'EVEQUE    | 50.41 | 4.32 | UCC seismic bulletin |      |       |       | 2.8 |    |          | 3.1   | F    |         | 0.3 M | ke   |    |
| 26  | 612      | 1970-11-03 | 08:45:59.6 | MARCHIENNE-AU-PONT   | 50.41 | 4.41 | Geoc. Imax(-1)       | 1.6  | 2.3   | 1.0   | 3.9 |    |          | 3.6   | 5    | 9.8 R3  | 0.3 M | ke   | 31 |
|     | 613      | 1970-11-03 | 12:07:33.4 | MARCHIENNE-AU-PONT   | 50.41 | 4.41 | From main event      |      |       |       | 3.0 |    |          | 3.1   | F    |         | 0.3 M | ke   |    |
|     | 614      | 1970-12-20 | 13:48:34.1 | LA LOUVIERE          | 50.46 | 4.21 | Ahorner (1972)       |      |       |       | 3.5 |    |          | 3.3   | F    |         | 0.3 M | ke   |    |
| 27  | 627      | 1976-10-24 | 20:33:28.2 | GIVRY                | 50.36 | 4.02 | Geoc. Imax(-1)       | 2.4  | 5.5   | 1.7   | 4.2 |    |          | [3.9] | 6    | 16.0 R3 | 0.3 M | ke   | 95 |
| 28  | 641      | 1982-09-14 | 19:24:34.7 | CARNIERES            | 50.44 | 4.24 | Geoc. Imax(-1)       | 2.0  | [3.5] | [1.6] | 3.4 |    |          | [3.4] | 4    | 6.9 R3  | 0.3 M | ke   | 18 |
|     | 642      | 1982-09-14 | 19:29:09.5 | CARNIERES            | 50.44 | 4.24 | From main event      |      |       |       | 2.6 |    |          | [2.9] | F    |         | 0.3 M | ke   |    |
|     | 648      | 1983-08-04 | 07:08:26.3 | CHARLEROI            | 50.42 | 4.45 | Geoc. Percept.       |      |       |       | 3.2 |    |          | [3.2] | 4    |         | 0.3 M | ke   |    |
|     | 649      | 1983-08-09 | 01:32:36.8 | CHARLEROI            | 50.42 | 4.45 | Geoc. Percept.       |      |       |       | 3.3 |    |          | [3.3] | 4    |         | 0.3 M | ke   |    |

## 2. Overview of Hainaut coal mining seismicity intensity data (BE)

**Table S2:** Summary table of EMS-98 intensity data of the 28 Hainaut coal mining earthquakes mapped in this Atlas.  
**IDP:** Intensity Data Point; **F:** Felt; **Inq:** official ROB inquiry; \*event used for constructing the Hainaut intensity attenuation model.

| Map             | id_earth             | Date       | Intensity (EMS-98) |     |        |     |        |     |      |     |      |    |        | Total IDPs |      |
|-----------------|----------------------|------------|--------------------|-----|--------|-----|--------|-----|------|-----|------|----|--------|------------|------|
|                 |                      |            | F                  | II  | II-III | III | III-IV | IV  | IV-V | V   | V-VI | VI | VI-VII |            | VII  |
| S1              | 449                  | 1911-04-12 |                    | 2   | 3      | 14  | 2      | 1   |      |     |      |    |        |            | 22   |
| S2              | 465*                 | 1911-06-01 |                    |     |        | 2   |        | 31  |      | 14  | 2    | 4  |        |            | 53   |
| S3              | 466                  | 1911-06-03 | 11                 |     |        |     |        | 2   |      | 1   |      | 1  |        | 1          | 16   |
| S4              | 476                  | 1920-01-17 | 9                  |     |        |     |        |     |      | 1   |      | 2  |        |            | 12   |
| S5              | 488                  | 1931-05-09 | 4                  |     |        |     |        |     | 1    |     |      |    |        |            | 5    |
| S6              | 505                  | 1936-11-05 |                    |     |        |     |        |     | 5    |     |      |    |        |            | 5    |
| S7              | 517                  | 1940-01-07 |                    |     | 2      | 6   | 5      | 3   |      | 1   |      |    |        |            | 17   |
| S8              | 518                  | 1940-01-07 | 7                  |     |        |     |        |     |      |     |      |    |        |            | 7    |
| S9              | 519                  | 1940-01-09 | 5                  |     |        | 2   |        | 2   | 1    |     |      |    |        |            | 10   |
| S10             | 534 <sup>Inq,*</sup> | 1949-04-03 |                    | 24  | 3      | 36  | 1      | 32  | 8    | 13  | 6    | 7  | 2      | 2          | 134  |
| S11             | 538                  | 1949-04-14 | 7                  |     |        |     |        | 6   |      | 2   |      |    |        |            | 15   |
| S12             | 539                  | 1949-04-14 | 12                 |     |        |     |        |     | 2    | 3   | 2    | 2  |        |            | 21   |
| S13             | 547 <sup>Inq</sup>   | 1952-10-21 |                    | 2   | 1      | 12  | 2      | 4   |      |     |      |    |        |            | 21   |
| S14             | 548 <sup>Inq</sup>   | 1952-10-22 |                    | 1   | 1      | 7   | 1      | 1   |      |     |      |    |        |            | 11   |
| S15             | 549 <sup>Inq</sup>   | 1952-10-27 |                    | 6   |        | 13  | 4      | 12  | 2    | 8   |      |    |        |            | 45   |
| S16             | 562 <sup>Inq,*</sup> | 1954-07-10 |                    | 11  |        | 7   | 1      | 9   | 2    | 12  | 2    |    |        |            | 44   |
| S17             | 582 <sup>Inq,*</sup> | 1965-12-15 |                    | 23  |        | 30  | 6      | 17  |      | 19  |      | 2  |        | 2          | 99   |
| S18             | 587 <sup>Inq</sup>   | 1966-01-16 |                    | 3   | 1      | 13  | 4      | 2   | 2    |     |      |    |        |            | 25   |
| S19             | 588 <sup>Inq,*</sup> | 1966-01-16 |                    | 15  | 1      | 8   | 2      | 12  | 1    | 2   |      |    |        |            | 41   |
| S20             | 589 <sup>Inq,*</sup> | 1966-01-16 |                    | 37  |        | 42  | 2      | 22  | 1    | 12  |      | 3  |        | 1          | 120  |
| S21             | 597 <sup>Inq,*</sup> | 1967-03-28 |                    | 40  |        | 56  | 3      | 22  | 1    | 10  |      | 9  |        | 2          | 143  |
| S22             | 603 <sup>Inq,*</sup> | 1968-08-12 |                    | 6   |        | 2   | 1      | 12  |      | 8   |      |    |        |            | 29   |
| S23             | 606 <sup>Inq,*</sup> | 1968-08-13 |                    | 18  |        | 9   |        | 10  |      | 17  | 1    | 4  |        |            | 59   |
| S24             | 607 <sup>Inq,*</sup> | 1968-09-23 |                    | 10  |        |     | 4      | 9   | 1    | 1   |      |    |        |            | 25   |
| S25             | 608 <sup>Inq</sup>   | 1968-09-23 |                    | 13  |        | 5   | 2      | 5   |      |     |      |    |        |            | 25   |
| S26             | 612 <sup>Inq,*</sup> | 1970-11-03 |                    | 6   |        | 9   | 3      | 5   |      | 8   |      |    |        |            | 31   |
| S27             | 627 <sup>Inq</sup>   | 1976-10-24 |                    | 24  |        | 24  | 1      | 33  | 1    | 10  |      | 2  |        |            | 95   |
| S28             | 641 <sup>Inq</sup>   | 1982-09-14 |                    | 1   | 1      | 8   | 1      | 7   |      |     |      |    |        |            | 18   |
| Total Intensity |                      |            | 55                 | 242 | 13     | 305 | 45     | 259 | 28   | 142 | 13   | 36 | 2      | 8          | 1148 |

*The damaging character of shallow 20<sup>th</sup> century earthquakes in the Hainaut coal area (Belgium)*

# Mw 3.1 Cuesmes 1911-04-12 (16h15)

**Figure S1**

**Right)** Macroseismic map of the 12 April 1911 Mw=3.1 earthquake at Cuesmes south of Mons (nr 1 in Table S1). Maximal intensity = IV. Intensity data available in Table S2 in this Atlas.

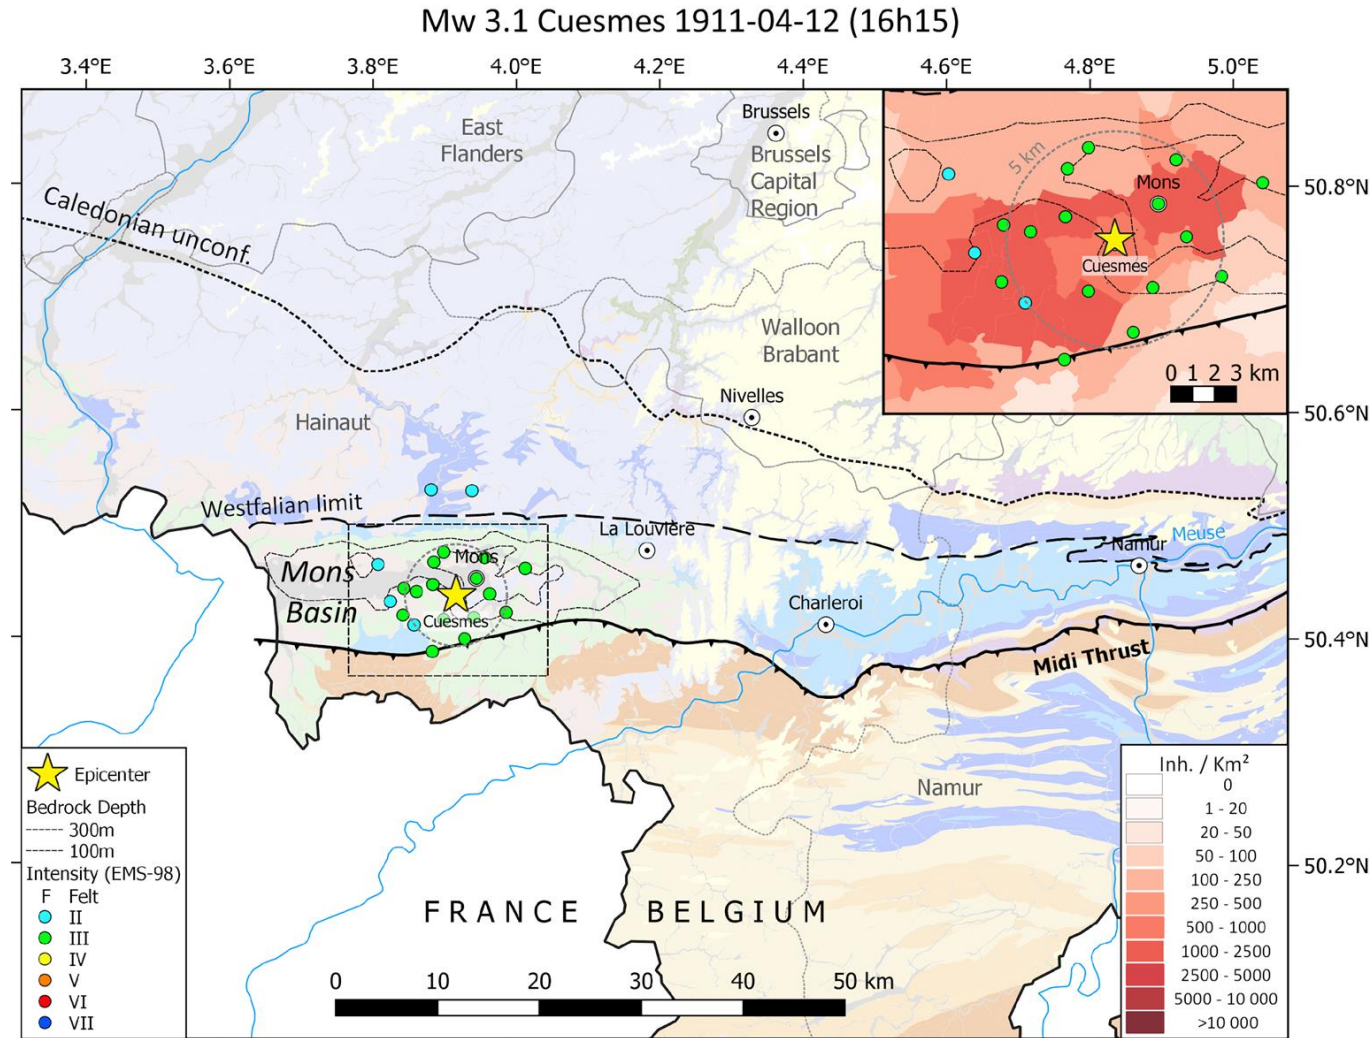

# Mw 3.9 Ransart 1911-06-01 (22h51)

**Figure S2**

**Right)** Macroseismic map of the 1 June 1911 Mw=3.9 ( $M_L=4.2$ ) earthquake at Ransart (nr 2 in Table S1). Maximal intensity = IV. Intensity data available in Table S2 in this Atlas.

**Below)** Intensity attenuation expressed as mean intensity change relative to  $I_0$  (blue dots) calculated for bins of 2.5 km (histogram). Blue dots are used in the attenuation modelling. Vertical blue bars show intensity standard deviation for each distance bin. Modelled epicentral intensity strength ( $I_0$ ) and focal depth ( $Z$ ) for the event are indicated in the legend.

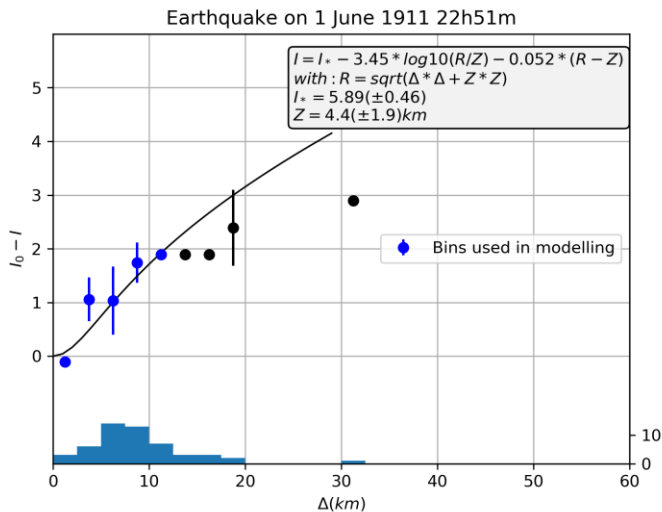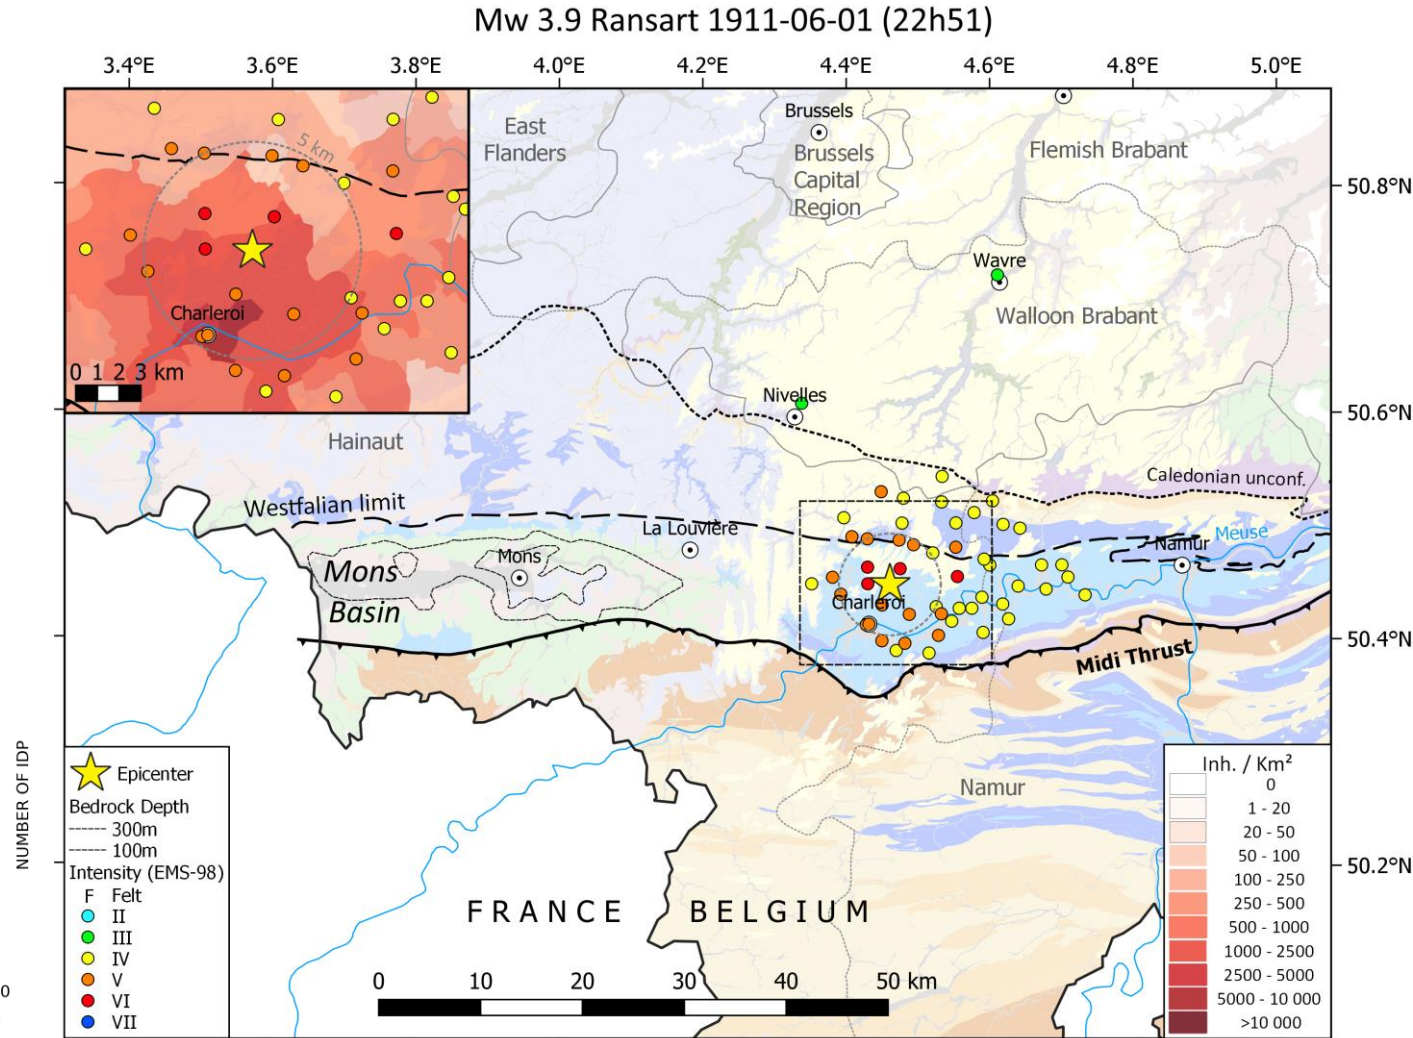

Geology in background based upon <http://www.onegeology.org/>. Reproduced with the permission of OneGeology. All rights Reserved.

# Mw 4.0 Gosselies 1911-06-03 (14h35)

**Figure S3**

**Right)** Macroseismic map of the 3 June 1911 Mw=3.9 ( $M_L=4.4$ ) Gosselies earthquake (nr 3 in Table S1). Maximal intensity = VII. Intensity data available in Table S2 in this Atlas.

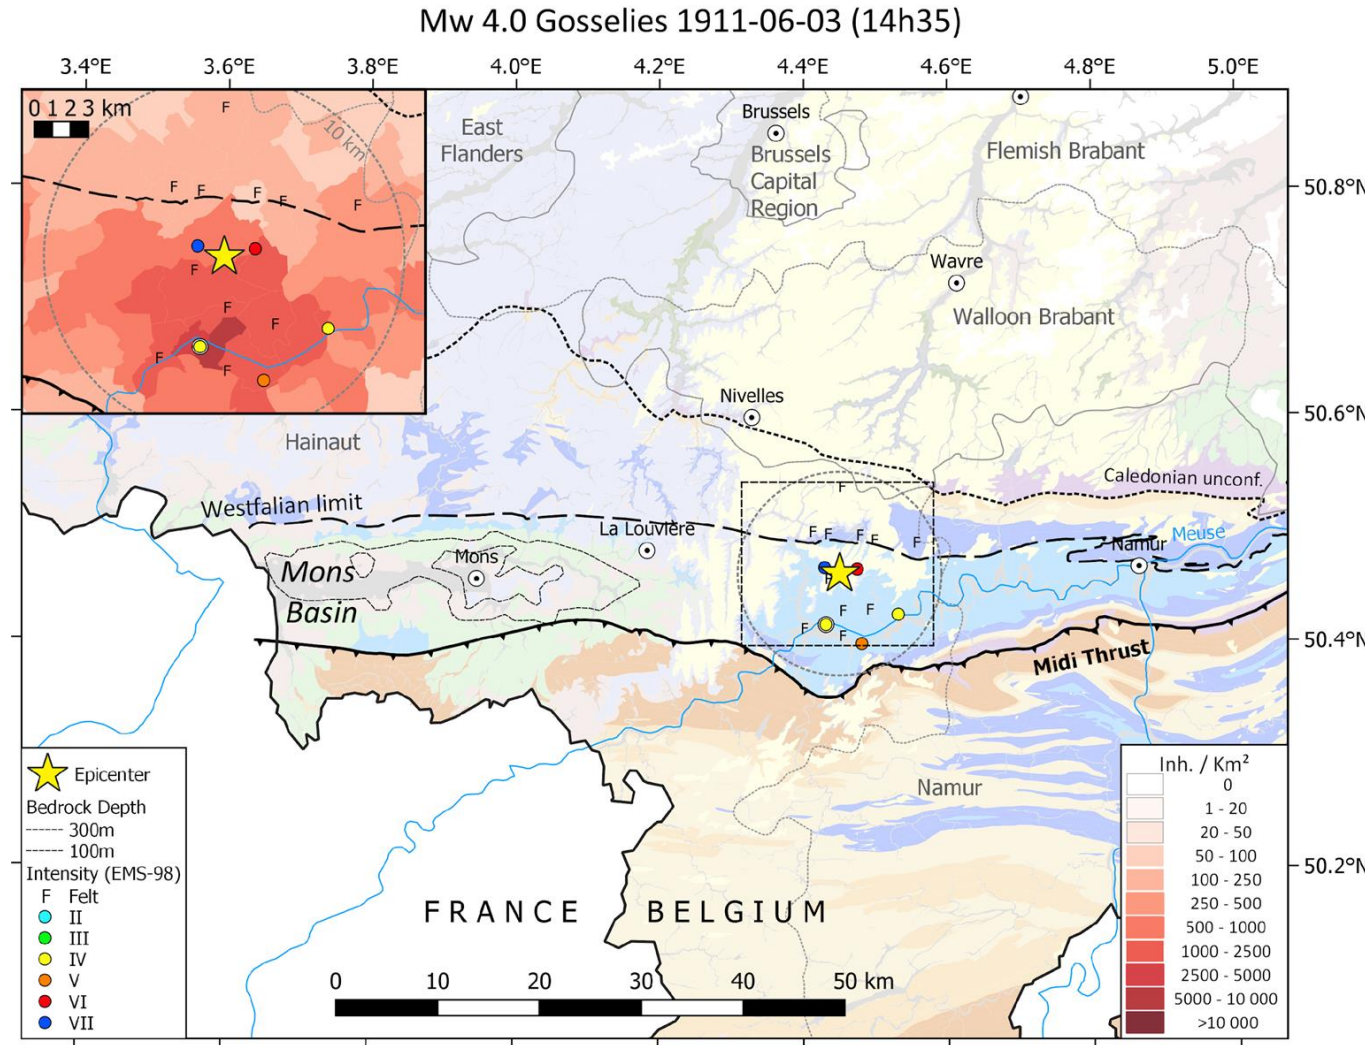

# Mw 3.5 Hornu 1920-01-17 (03h11)

**Figure S4**

**Right)** Macroseismic map of the 17 January 1920 Mw=3.5 ( $M_L=3.7$ ) earthquake in the Borinage near Hornu (nr 4 in Table S1). Maximal intensity = VI. Intensity data available in Table S2 in this Atlas.

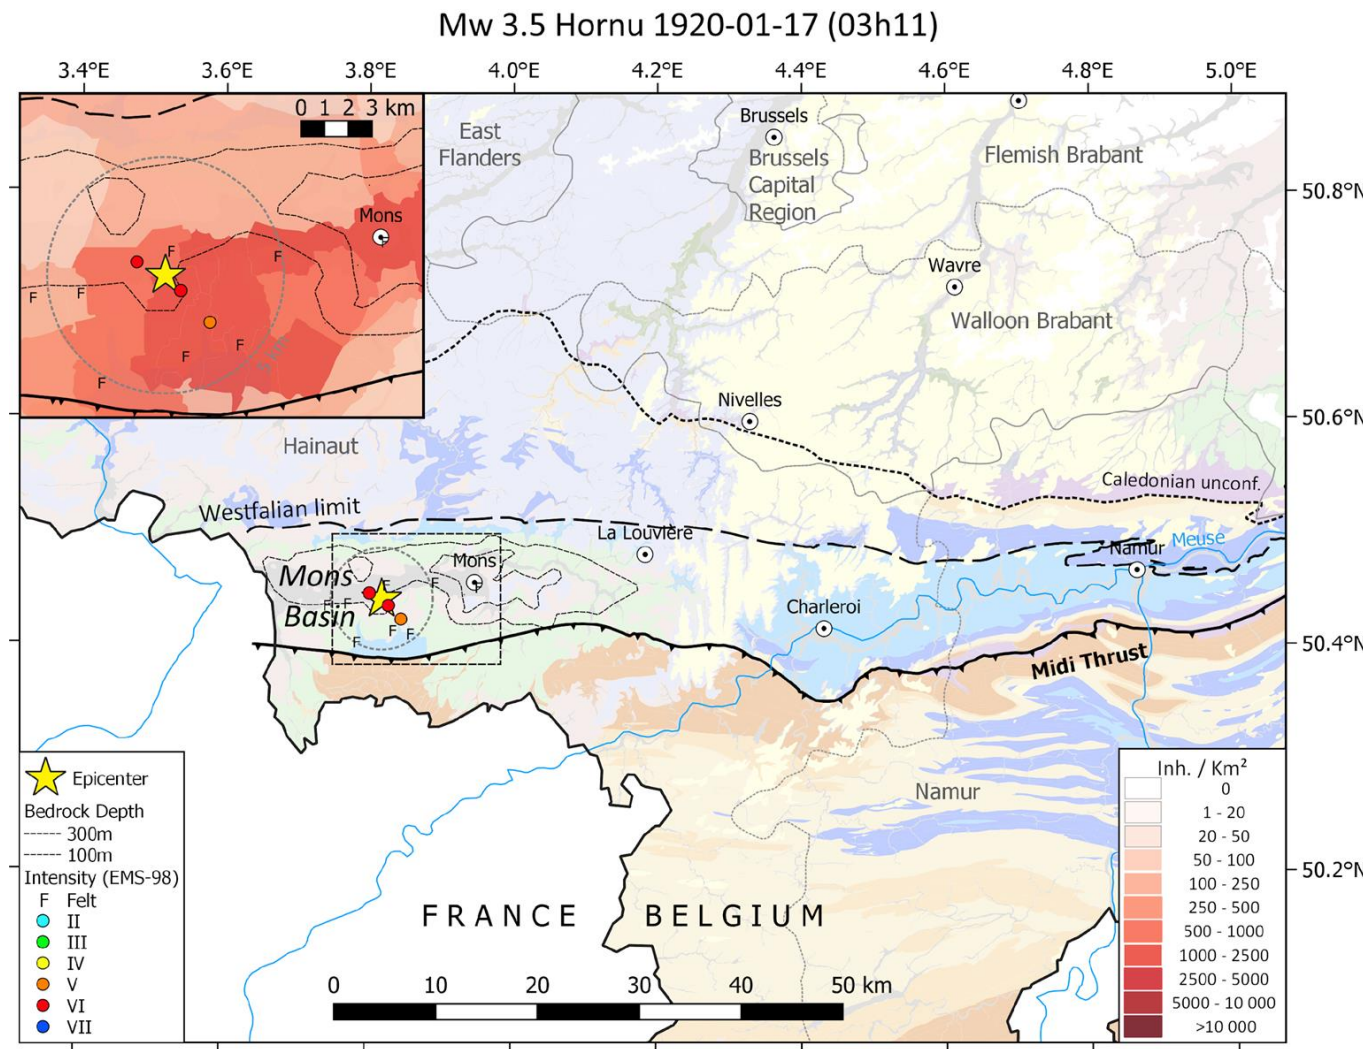

# Mw 3.0 Houdeng-Aimeries 1931-05-09 (12h25)

**Figure S5**

**Right)** Macroseismic map of the 9 May 1931 Mw=3.0 ( $M_L=2.8$ ) earthquake east of La Louvière (nr 5 in Table S1). Maximal intensity = IV to V. Intensity data available in Table S2 in this Atlas.

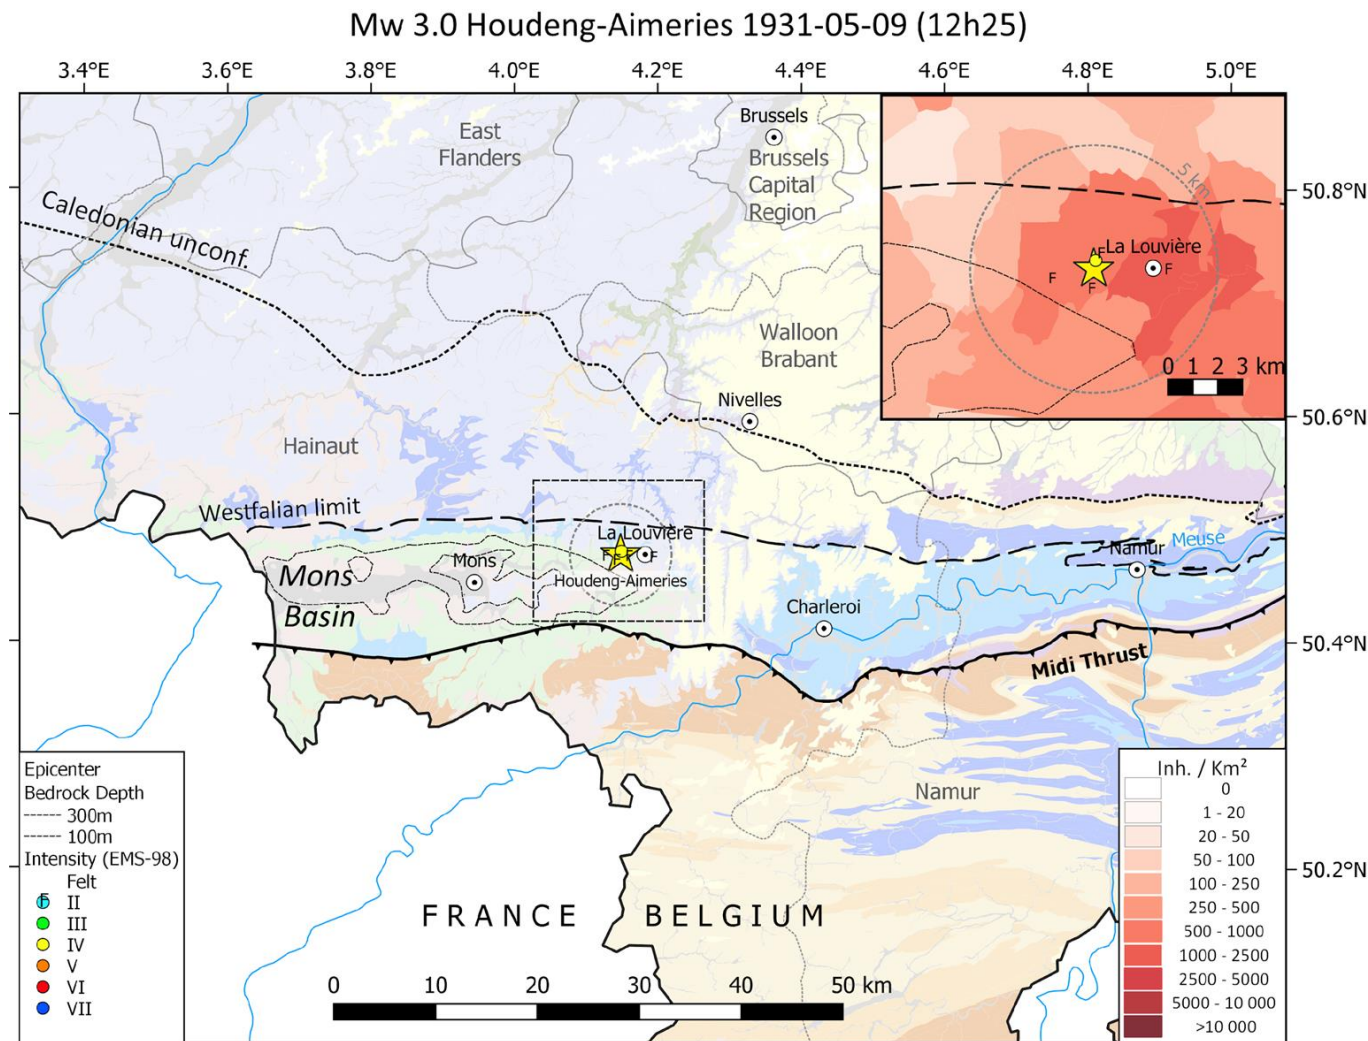

Geology in background based upon <http://www.onegeology.org/>. Reproduced with the permission of OneGeology. All rights Reserved.

# Mw 3.3 Gouy-Lez-Piéton 1936-11-05 (00h41)

**Figure S6**

**Right)** Macroseismic map of the 5 November 1936 Mw=3.3 earthquake near Gouy-Lez-Piéton (nr 6 in Table S1). Maximal intensity = IV to V. Intensity data available in Table S2 in this Atlas.

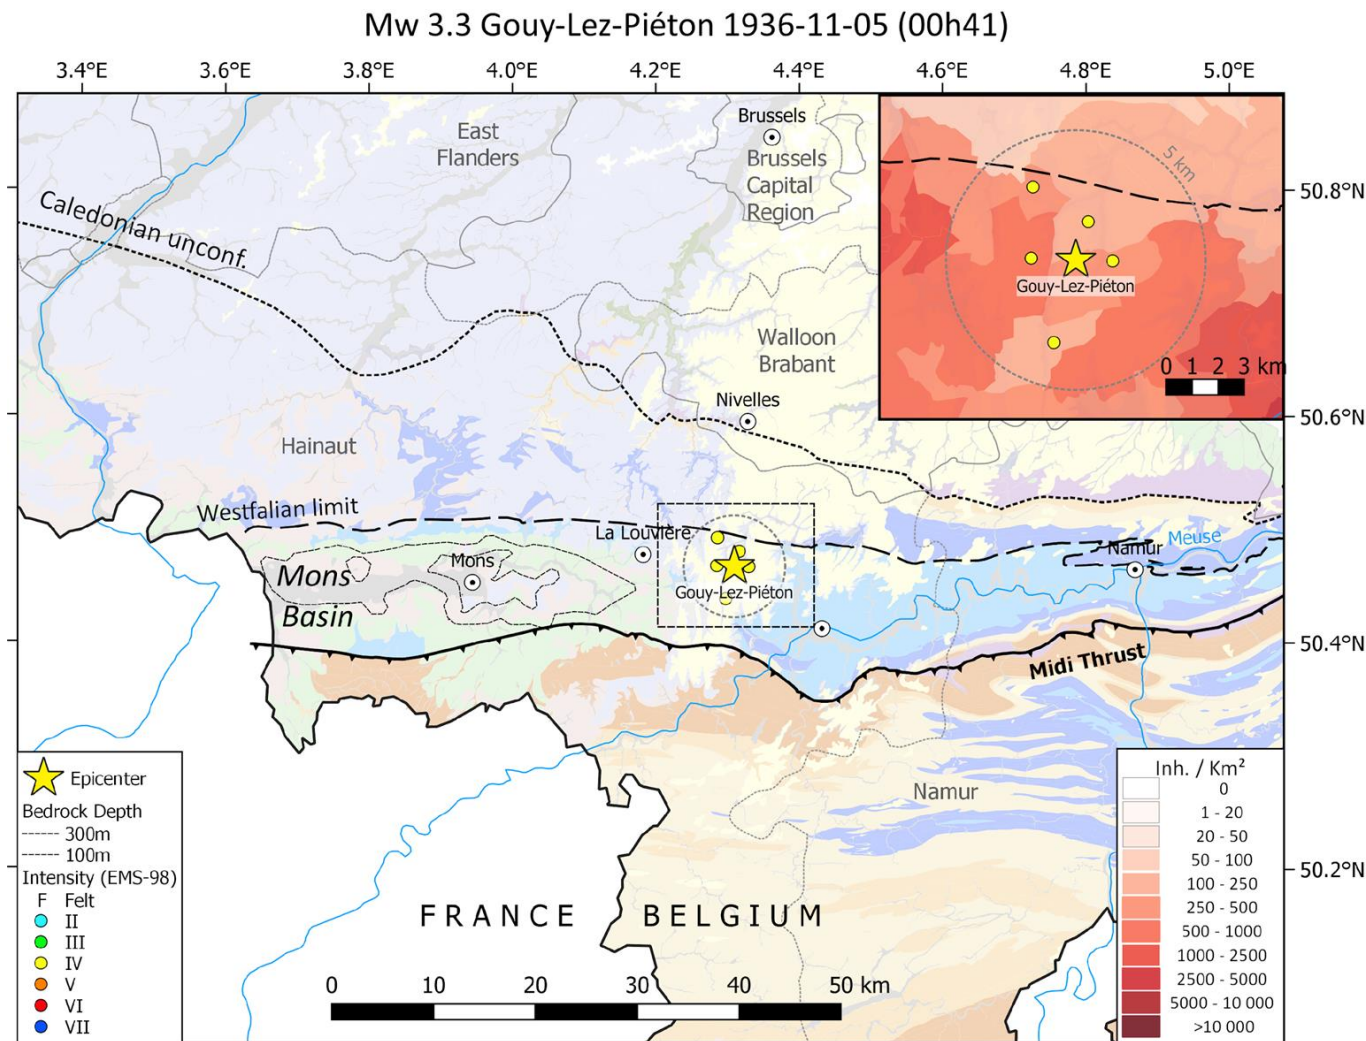

# Mw 3.5 La Louvière 1940-01-07 (16h28)

**Figure S7**

**Right)** Macroseismic map of the 7 January 1940 Mw=3.5 earthquake at 16h28 in La Louvière (nr 7 in Table S1). Maximal intensity = V. Intensity data available in Table S2 in this Atlas.

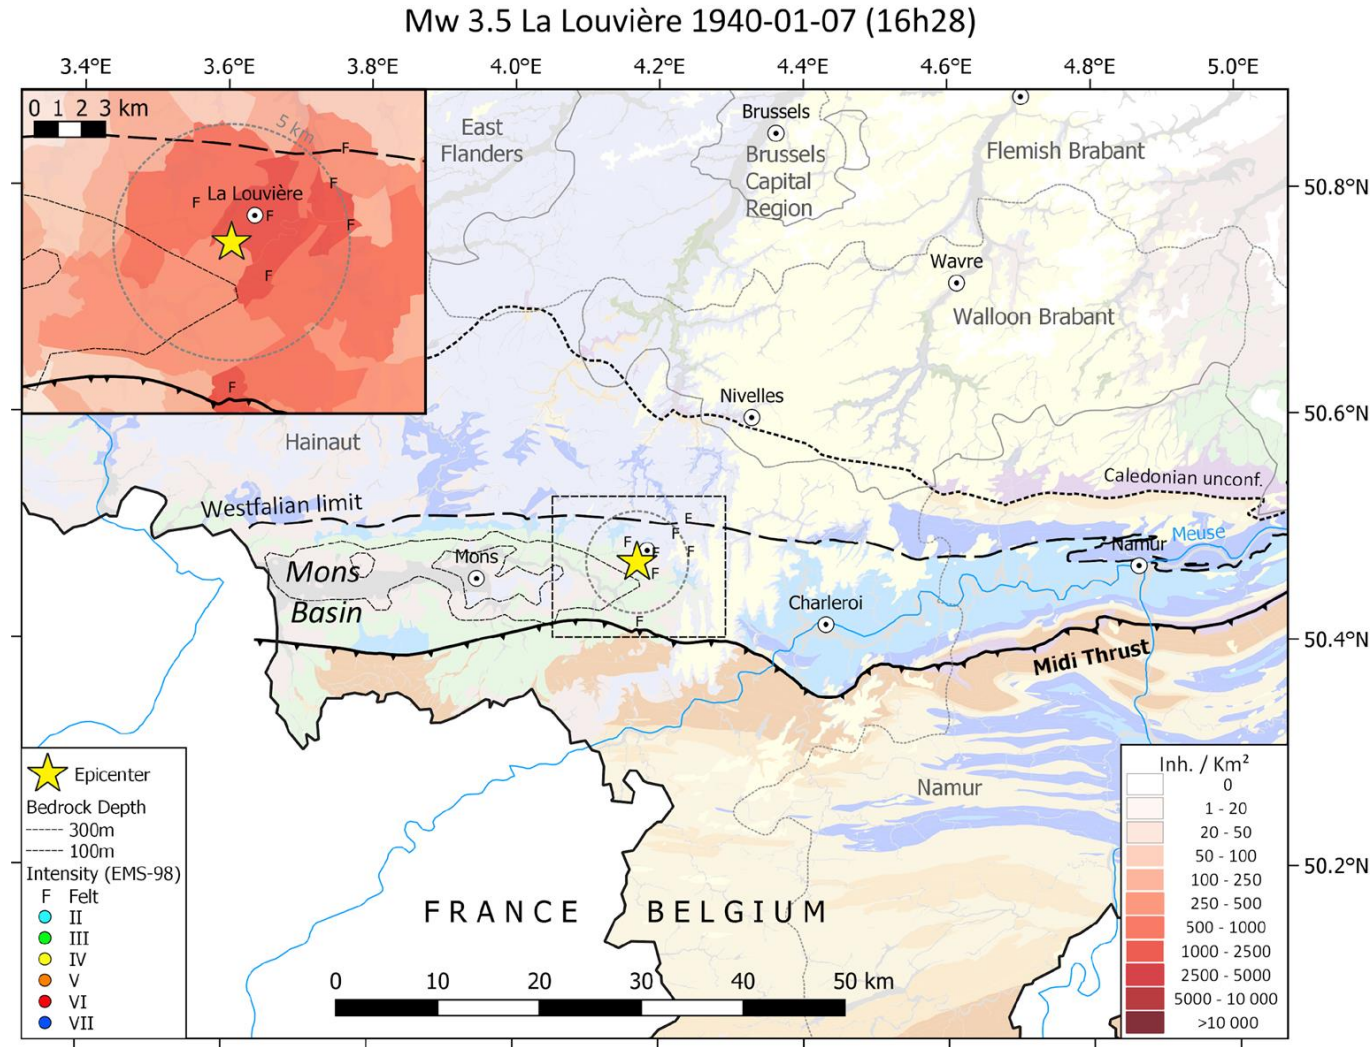

# Mw 3.1 La Louvière 1940-01-07 (20h32)

**Figure S8**

**Right)** Macroseismic map of the 7 January 1940 Mw=3.5 earthquake at 20h32 in La Louvière (nr 8 in Table S1). Maximal intensity = IV. Intensity data available in Table S2 in this Atlas.

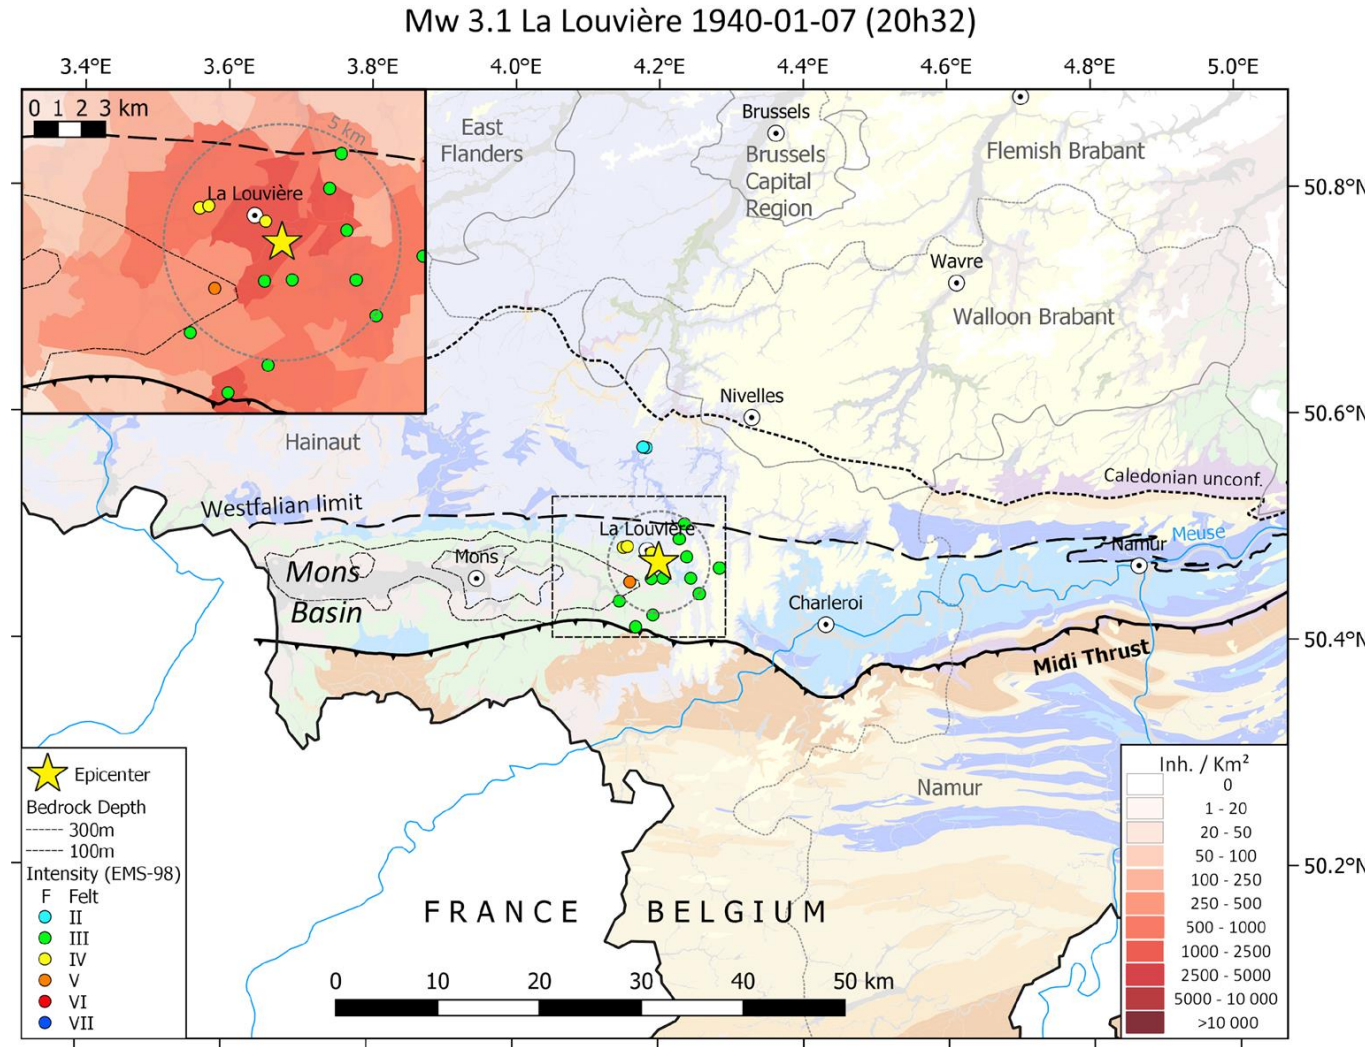

# Mw 3.1 La Louvière 1940-01-09 (03h42)

**Figure S9**

**Right)** Macroseismic map of the 9 January 1940 Mw=3.1 earthquake in La Louvière (nr 9 in Table S1). According to newspapers, this event was locally felt in the mines. Maximal intensity = V. Intensity data available in Table S2 in this Atlas.

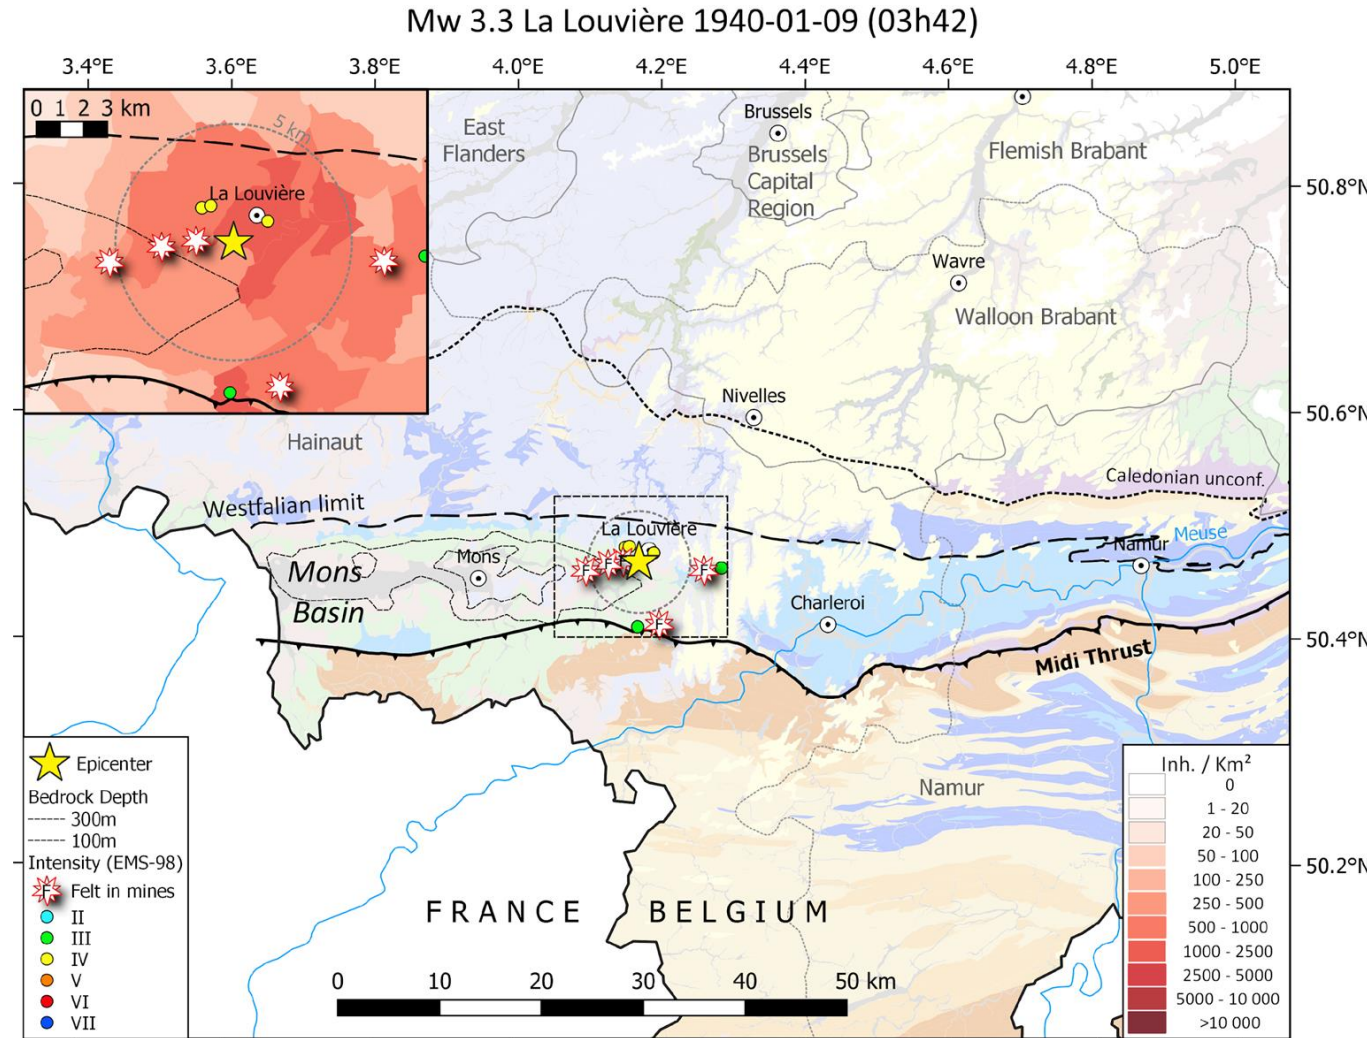

# Mw 4.1 Havré-Boussoit 1949-04-03 (12h33)

**Figure S10**

**Right)** Macroseismic map of the 3 April 1949 Mw=4.1 ( $M_L=4.6$ ) earthquake near Havré and Boussoit (nr 10 in Table S1). Maximal intensity = VII. Intensity data available in Table S2 in this Atlas.

**Below)** Intensity attenuation expressed as mean intensity change relative to  $I_0$  (blue dots) calculated for bins of 2.5 km (histogram). Blue dots are used in the attenuation modelling. Vertical blue bars show intensity standard deviation for each distance bin. Modelled epicentral intensity strength ( $I_0$ ) and focal depth ( $Z$ ) for the event are indicated in the legend.

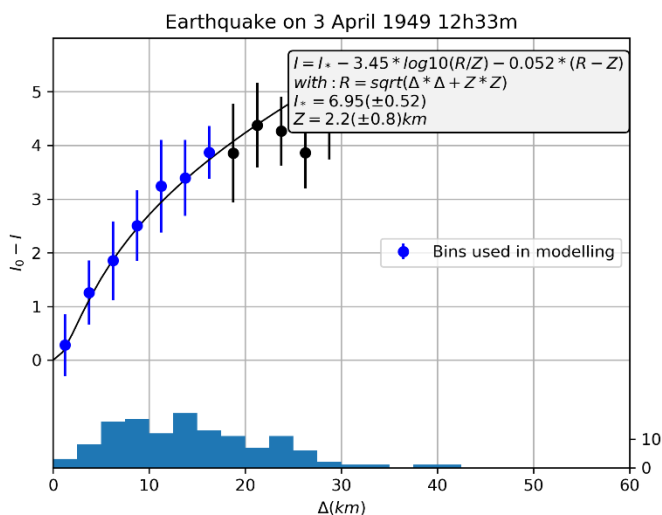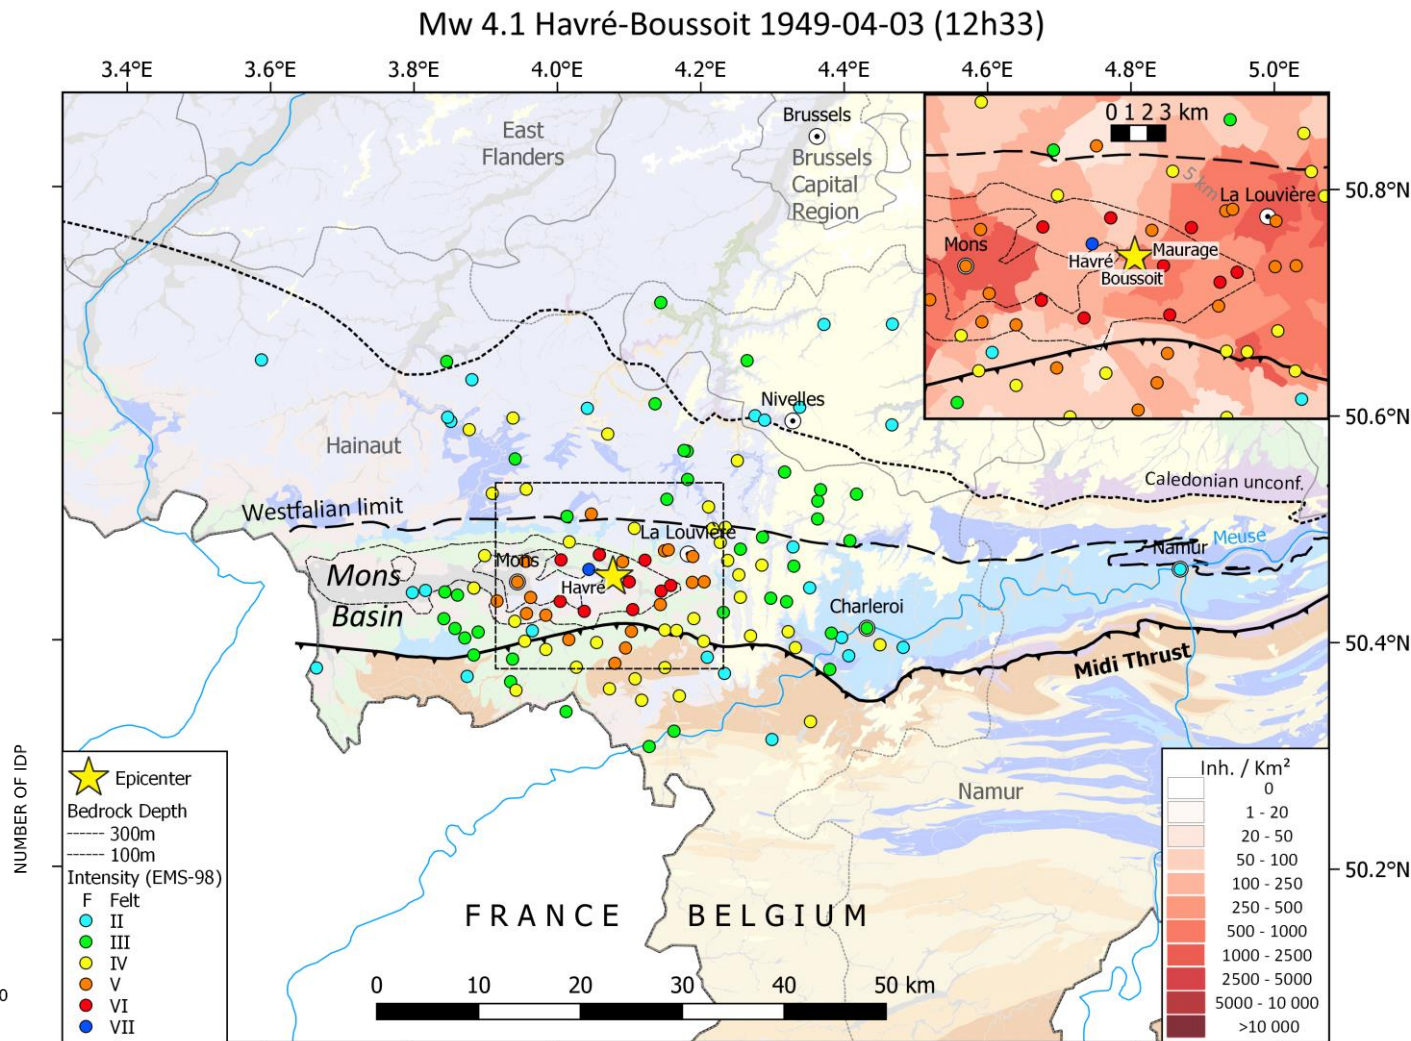

Geology in background based upon <http://www.onegeology.org/>. Reproduced with the permission of OneGeology. All rights Reserved.

# Mw 3.5 Havré-Boussoit 1949-04-14 (01h09)

**Figure S11**

**Right)** Macroseismic map of the 14 April 1949 Mw=3.5 earthquake at 01h09 near Havré and Boussoit (nr 11 in Table S1). Maximal intensity = V. Intensity data available in Table S2 in this Atlas.

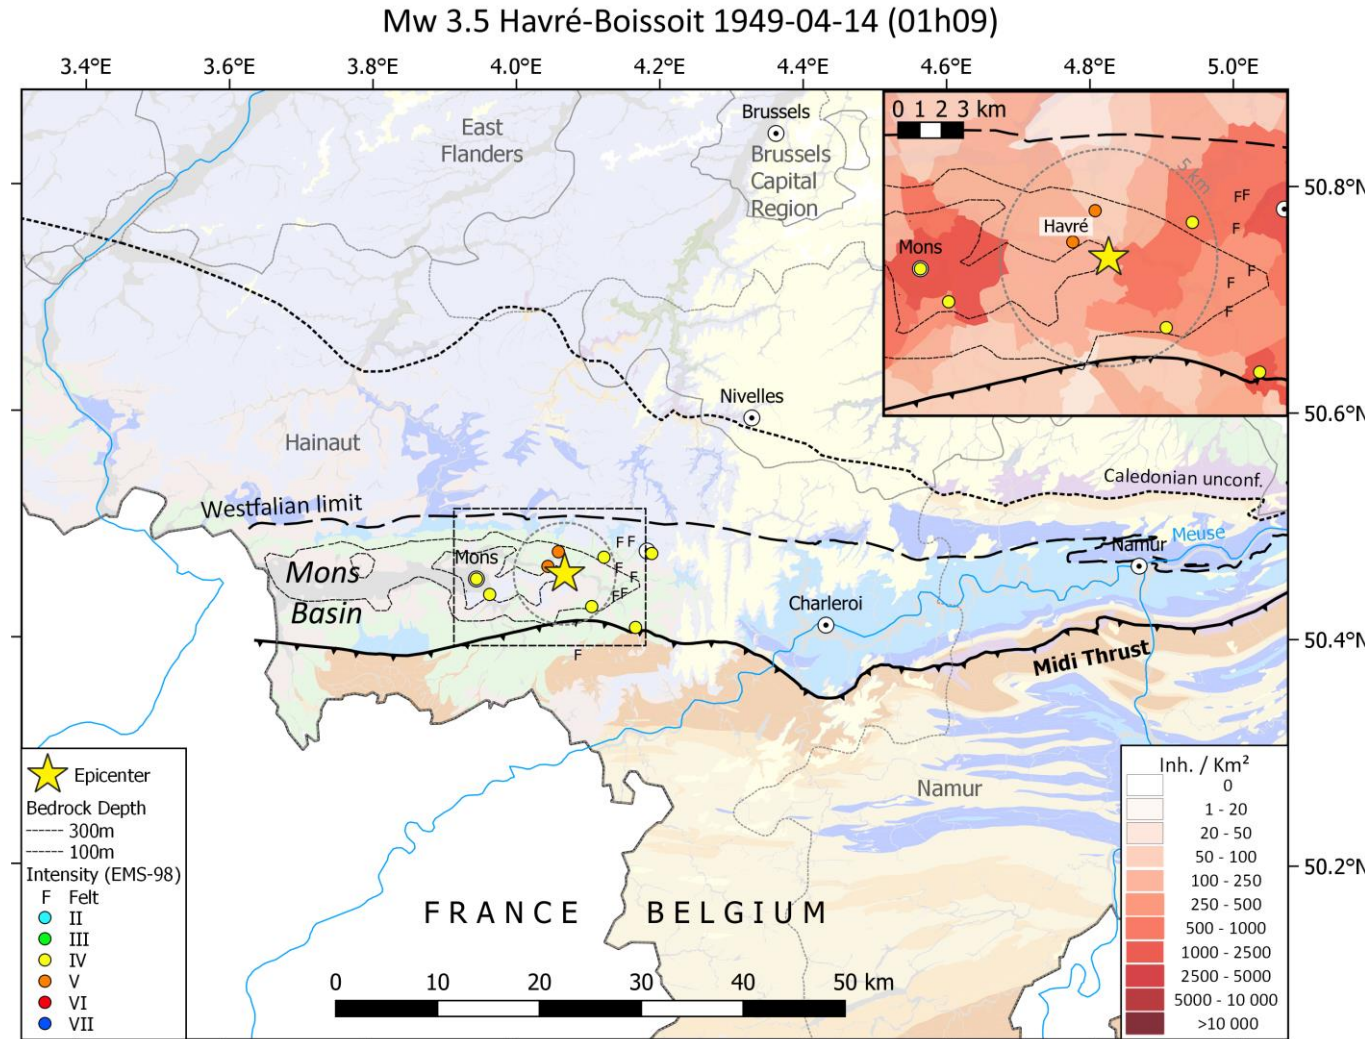

Geology in background based upon <http://www.onegeology.org/>. Reproduced with the permission of OneGeology. All rights Reserved.

# Mw 3.6 Havré 1949-04-14 (05h12)

**Figure S12**

**Right)** Macroseismic map of the 14 April 1949 at 05h12 Mw=3.6 ( $M_L=3.8$ ) earthquake near Havré (nr 12 in Table S1). Maximal intensity = VI. Intensity data available in Table S2 in this Atlas.

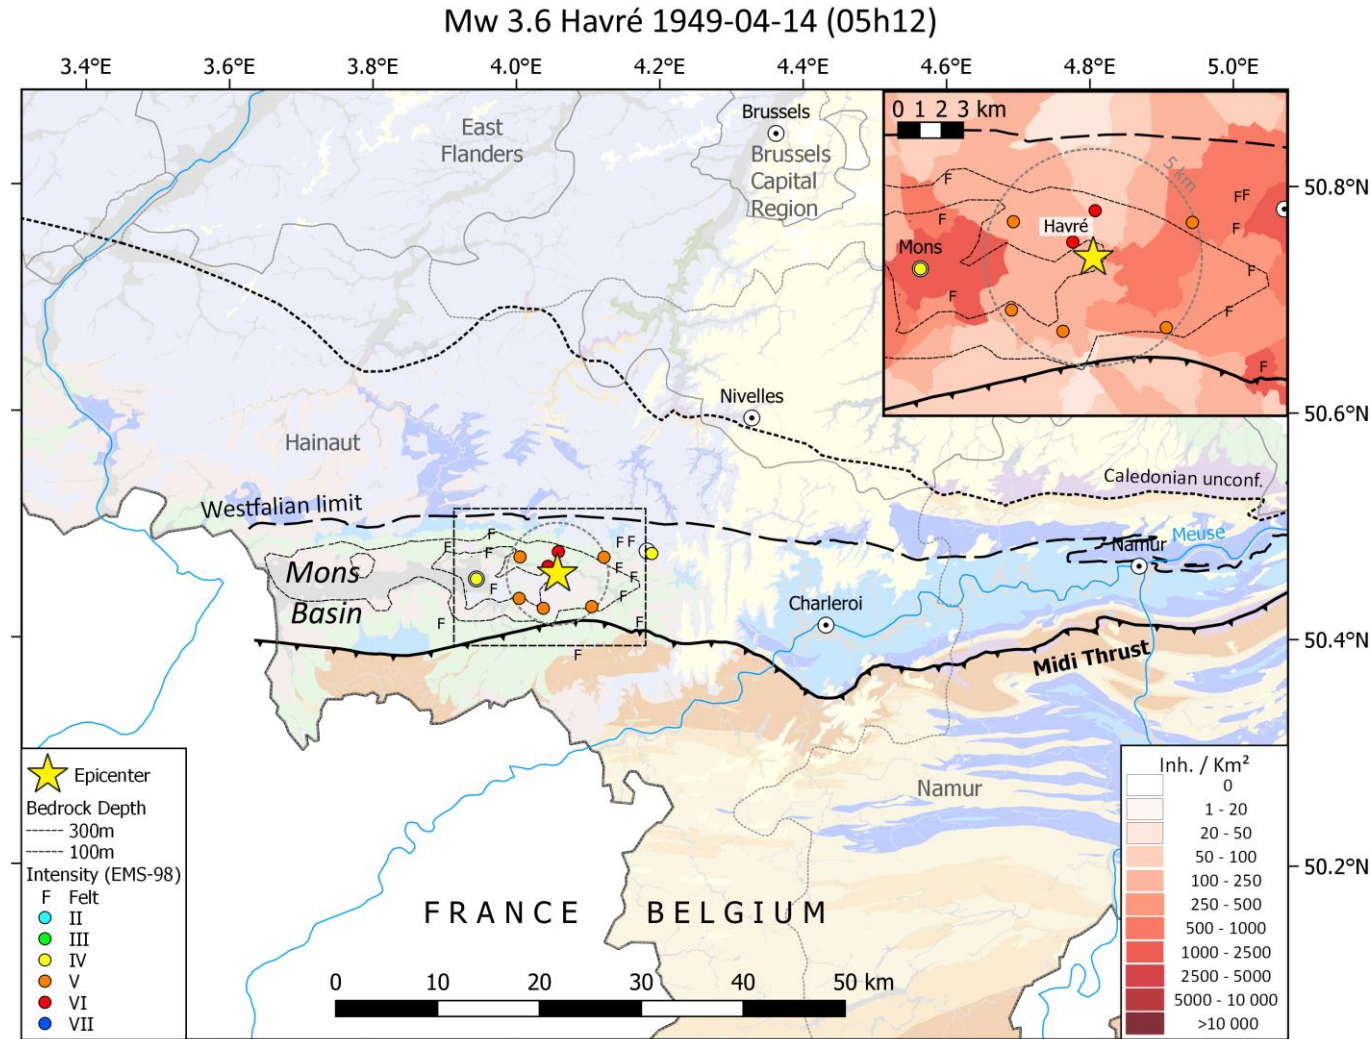

# Mw 3.1 Quaregnon 1952-10-21 (21h15)

**Figure S13**

**Right)** Macroseismic map of the 21 October 1952 21h15 Mw=3.1 earthquake in the Borinage (nr 13 in Table S1). Maximal intensity = IV. Intensity data available in Table S2 in this Atlas.

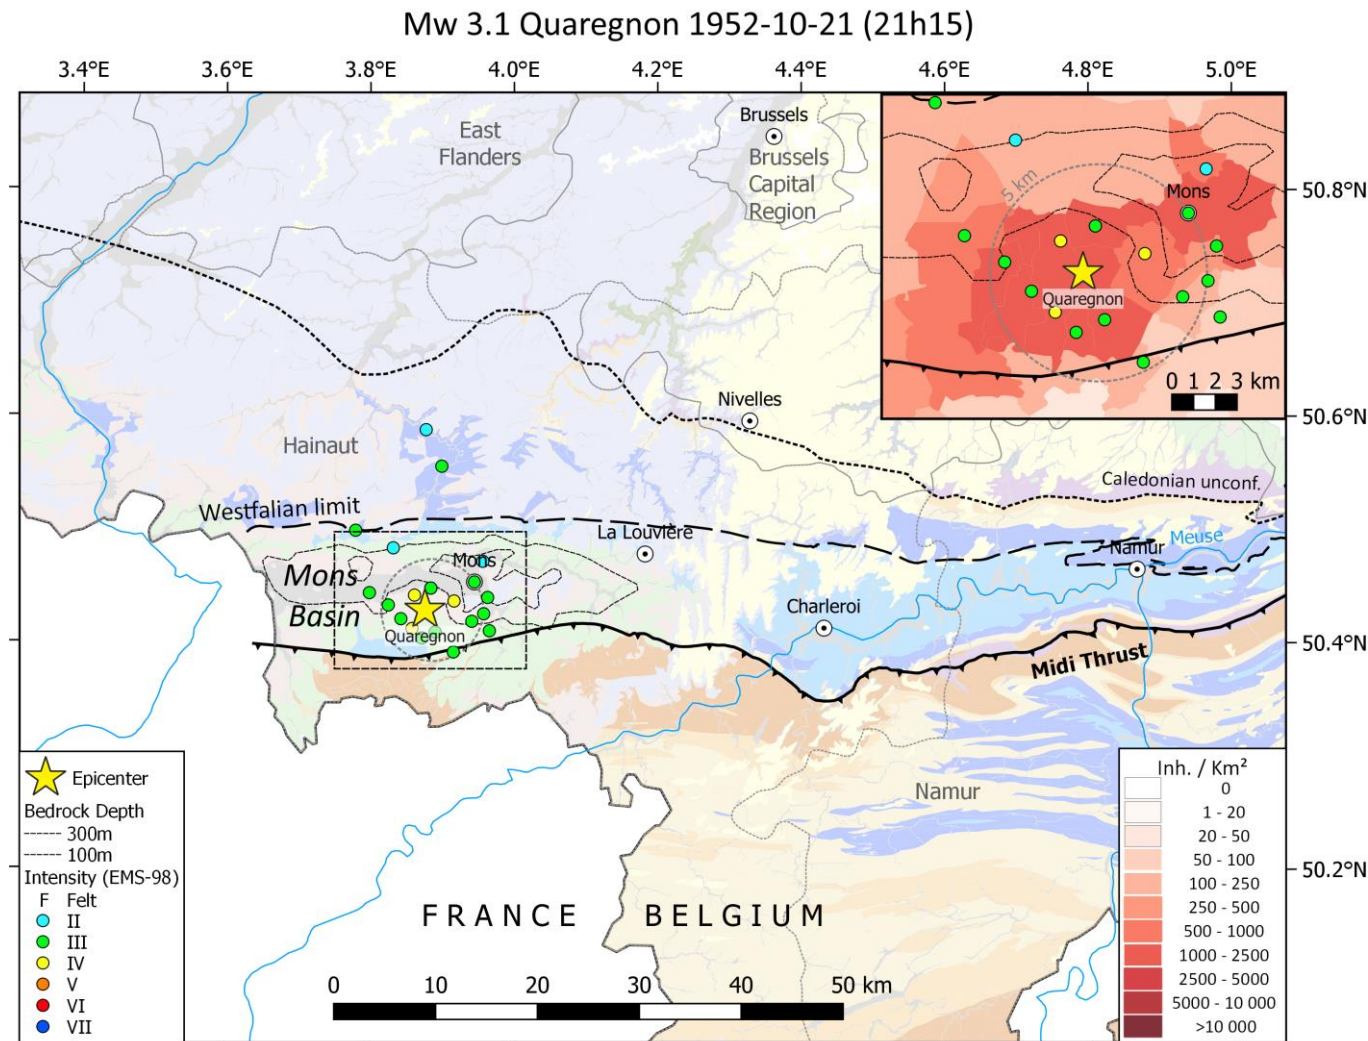

Geology in background based upon <http://www.onegeology.org/>. Reproduced with the permission of OneGeology. All rights Reserved.

# Mw 2.8 Frameries 1952-10-22 (~7h)

**Figure S14**

**Right)** Macroseismic map of the 22 October 1952 at ~7h Mw=2.8 earthquake in the Borinage (nr 14 in Table S1). Maximal intensity = III. Intensity data available in Table S2 in this Atlas.

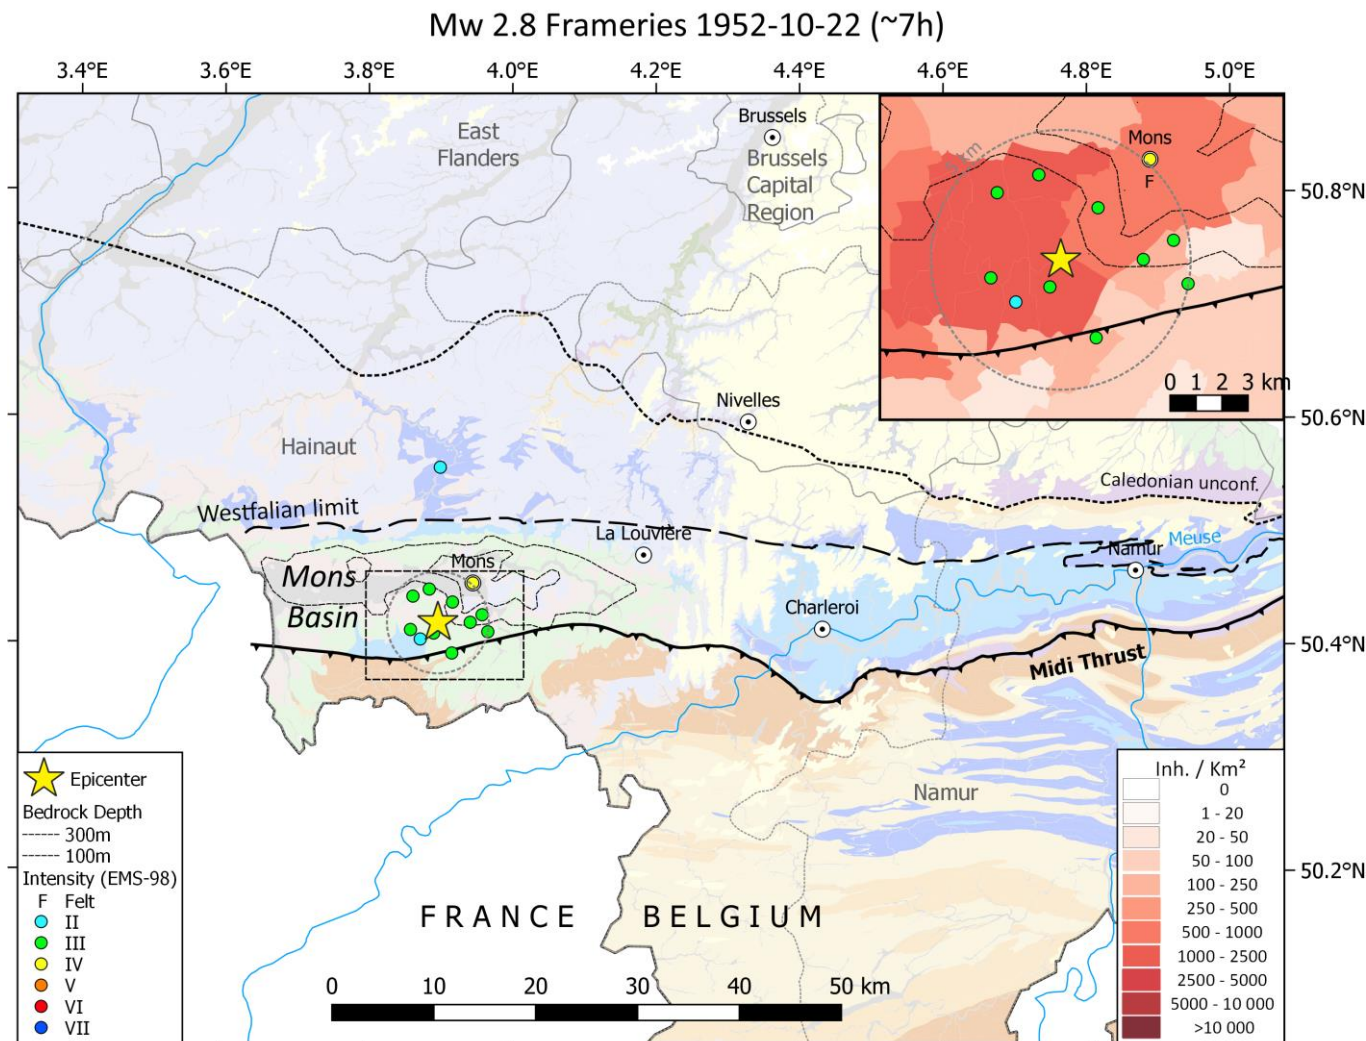

Geology in background based upon <http://www.onegeology.org/>. Reproduced with the permission of OneGeology. All rights Reserved.

# Mw 3.5 Quaregnon 1952-10-27 (06h11)

**Figure S15**

**Right)** Macroseismic map of the 27 October 1952 6h11 Mw=3.5 earthquake in the Borinage (nr 15 in Table S1). Maximal intensity = V. Intensity data available in Table S2 in this Atlas.

**Below)** Intensity attenuation expressed as mean intensity change relative to  $I_0$  (blue dots) calculated for bins of 2.5 km (histogram). Blue dots are used in the attenuation modelling. Vertical blue bars show intensity standard deviation for each distance bin. Modelled epicentral intensity strength ( $I_0$ ) and focal depth (Z) for the event are indicated in the legend.

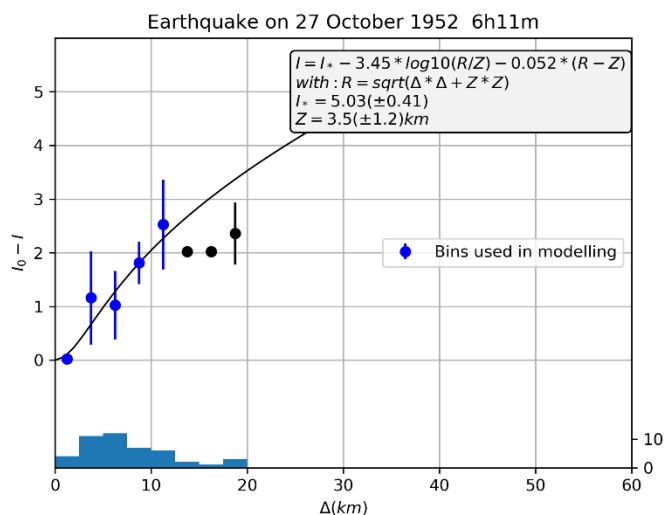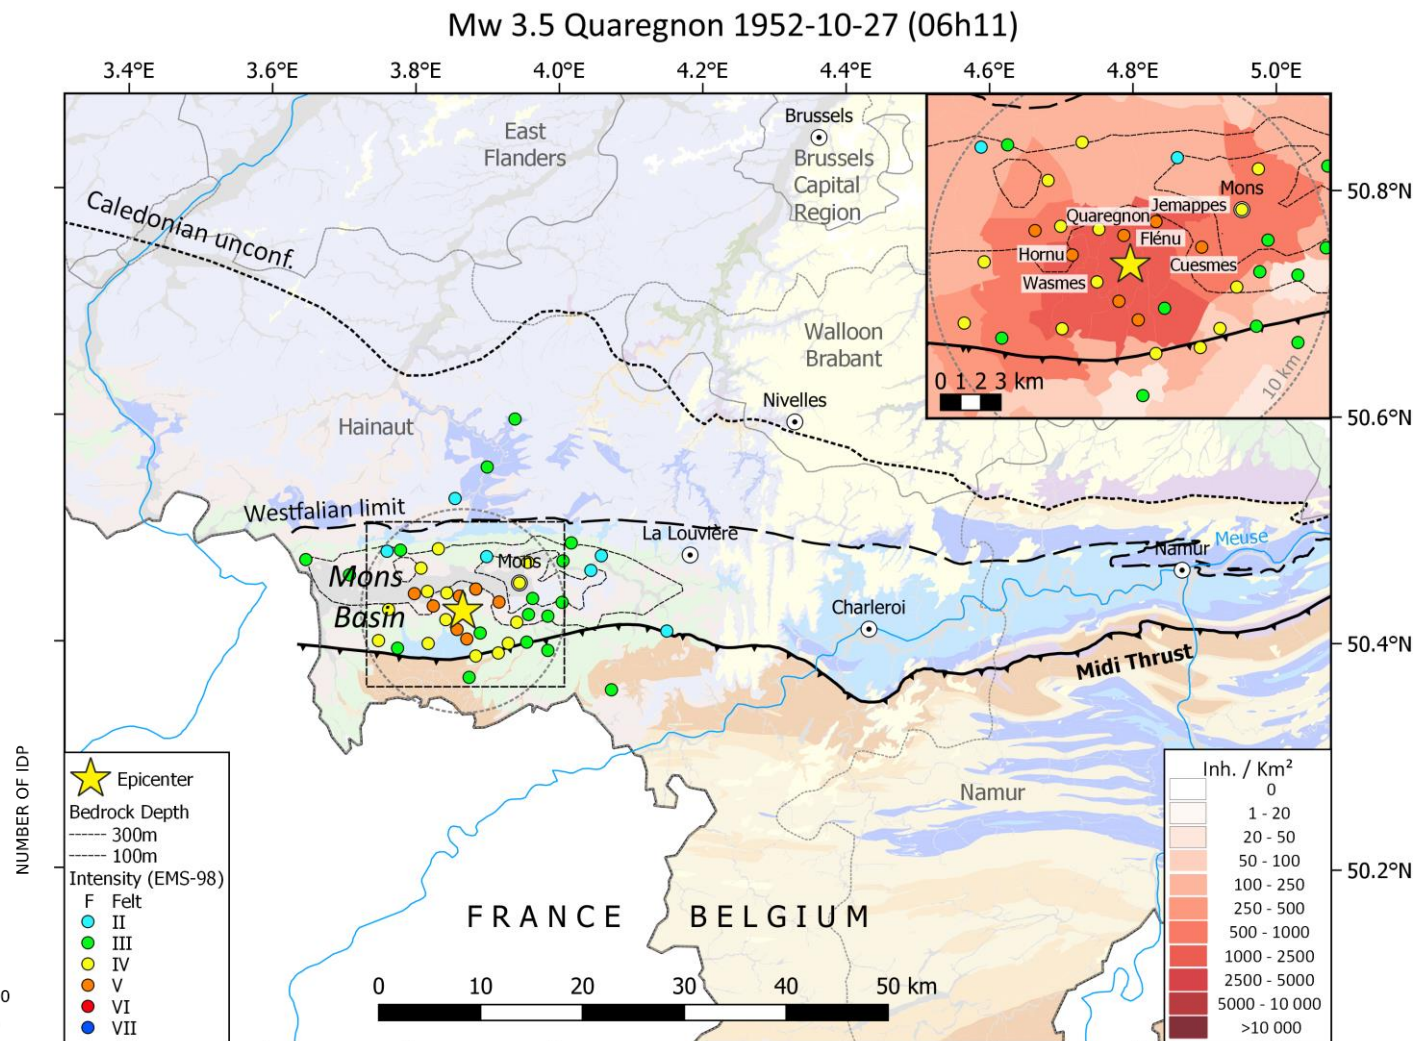

Geology in background based upon <http://www.onegeology.org/>. Reproduced with the permission of OneGeology. All rights Reserved.

# Mw 3.5 Flénu 1954-07-10 (17h18)

**Figure S16**

**Right)** Macroseismic map of the 1954 Mw=3.5 earthquake in the Borinage (nr 16 in Table S1). Maximal intensity = V. Intensity data available in Table S2 in this Atlas.

**Below)** Intensity attenuation expressed as mean intensity change relative to  $I_0$  (blue dots) calculated for bins of 2.5 km (histogram). Blue dots are used in the attenuation modelling. Vertical blue bars show intensity standard deviation for each distance bin. Modelled epicentral intensity strength ( $I_0$ ) and focal depth (Z) for the event are indicated in the legend.

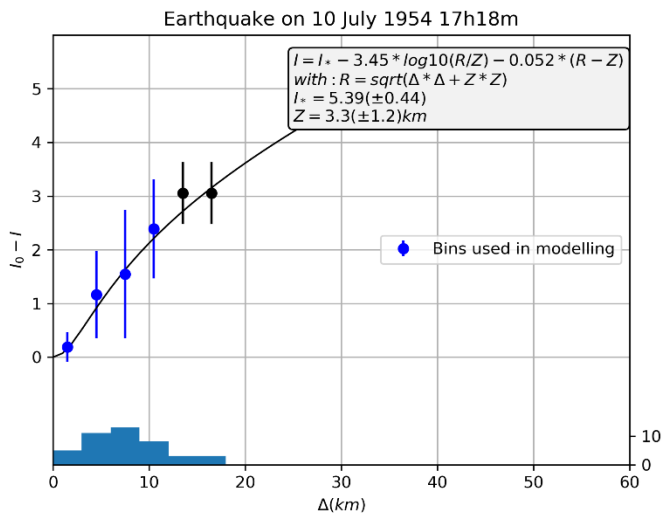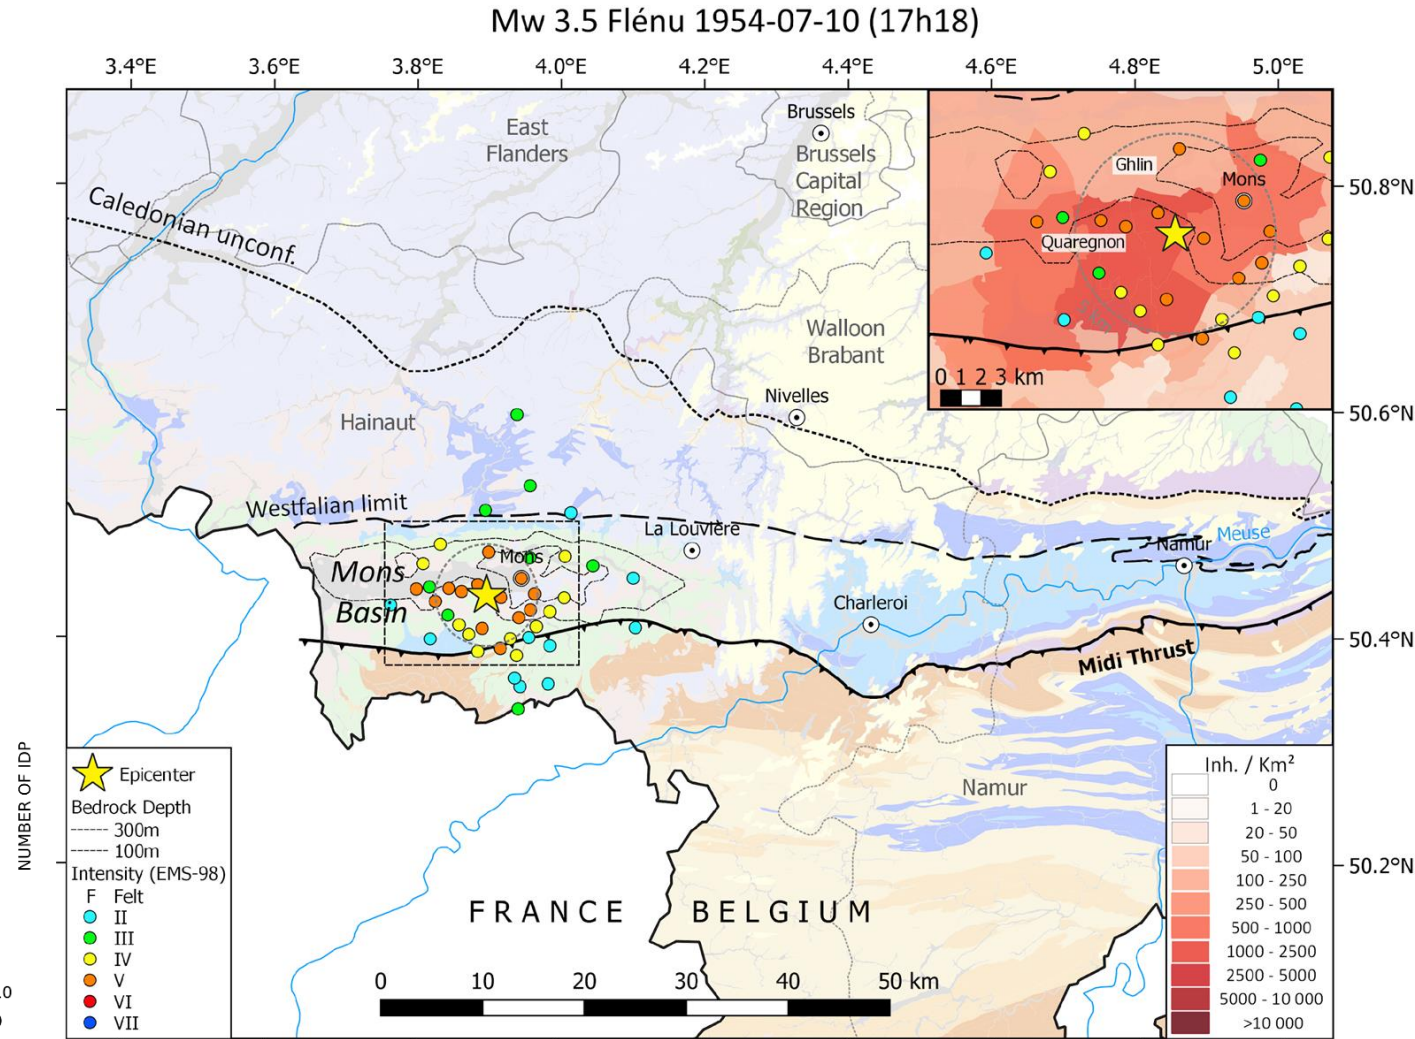

Geology in background based upon <http://www.onegeology.org/>. Reproduced with the permission of OneGeology. All rights Reserved.

# Mw 4.0 Strépy-Bracquenies 1965-12-15 (12h07)

**Figure S17**

**Right)** Macroseismic map of the damaging 1965 Mw=4.0 ( $M_L=4.4$ ) Strépy-Bracquenies earthquake (nr 17 in Table S1). Maximal intensity = VII. The inset shows localities where damage has been reported in press reports with population density as background. Intensity data available in Table S2 in this Atlas.

**Below)** Intensity attenuation expressed as mean intensity change relative to  $I_0$  (blue dots) calculated for bins of 2.5 km (histogram). Blue dots are used in the attenuation modelling. Vertical blue bars show intensity standard deviation for each distance bin. Modelled epicentral intensity strength ( $I_0$ ) and focal depth ( $Z$ ) for the event are indicated in the legend.

Earthquake on 15 December 1965 12h07m

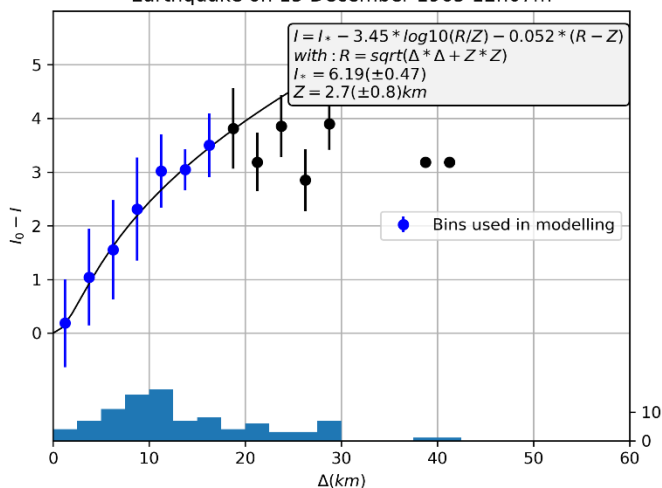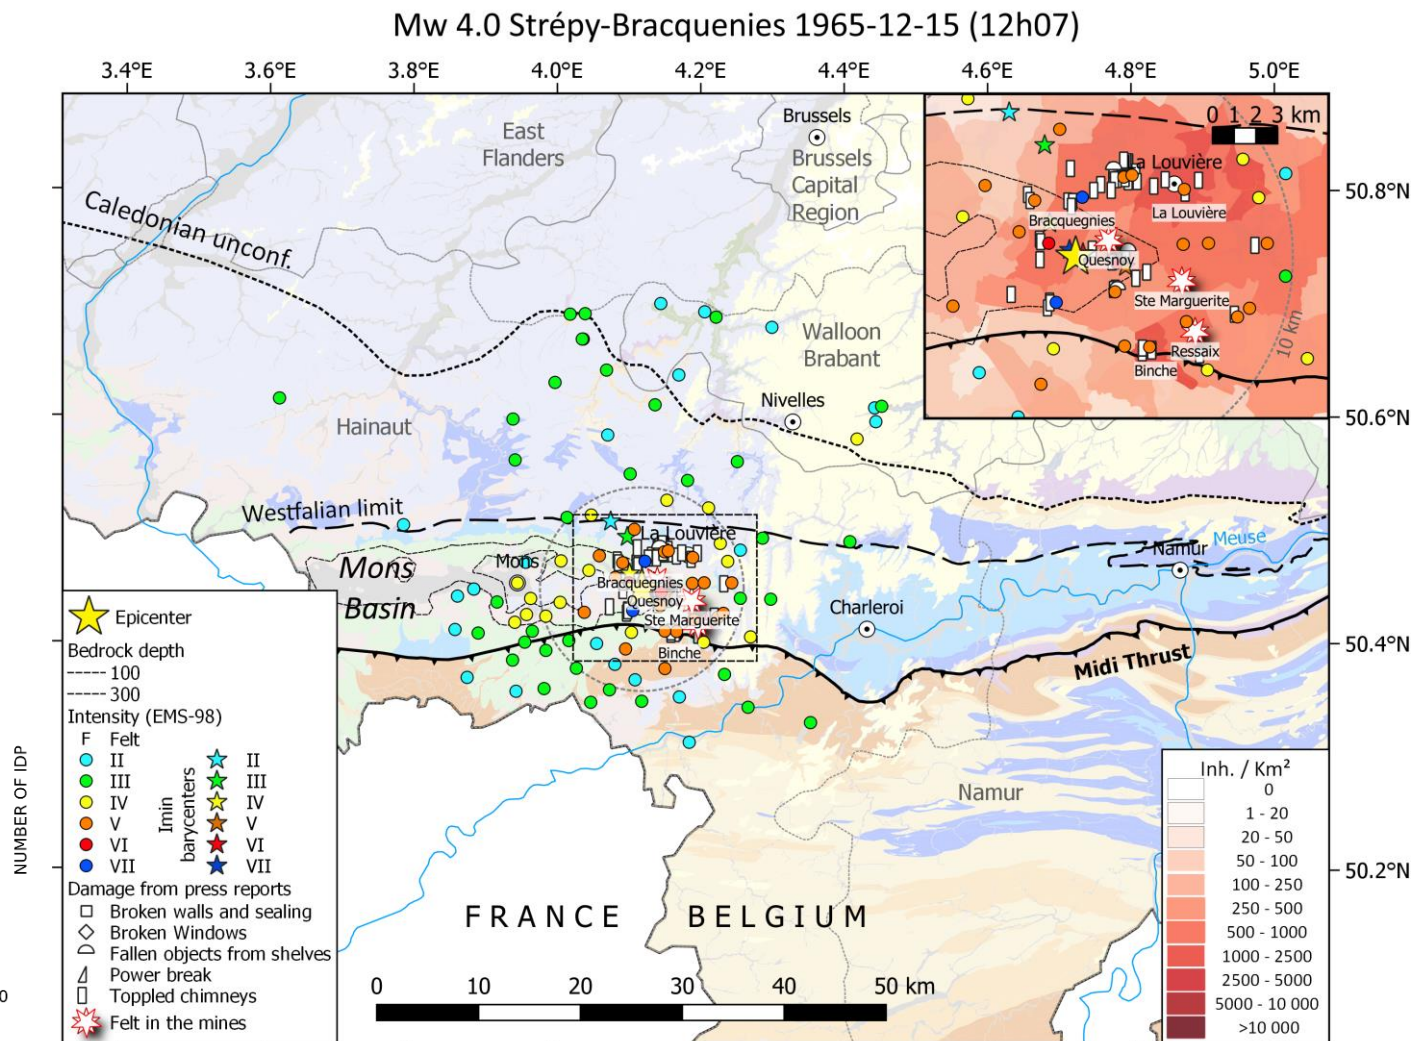

Geology in background based upon <http://www.onegeology.org/>. Reproduced with the permission of OneGeology. All rights Reserved.

# Mw 2.9 Morlanwelz-Mariemont 1966-01-16 (00h13)

**Figure S18**

**Right)** Macroseismic map of the 1966 Mw=2.9 ( $M_L=2.7$ ) Morlanwelz-Mariemont earthquake (nr 18 in Table 1). Maximal intensity = III. Intensity data available in Table S2 in this Atlas.

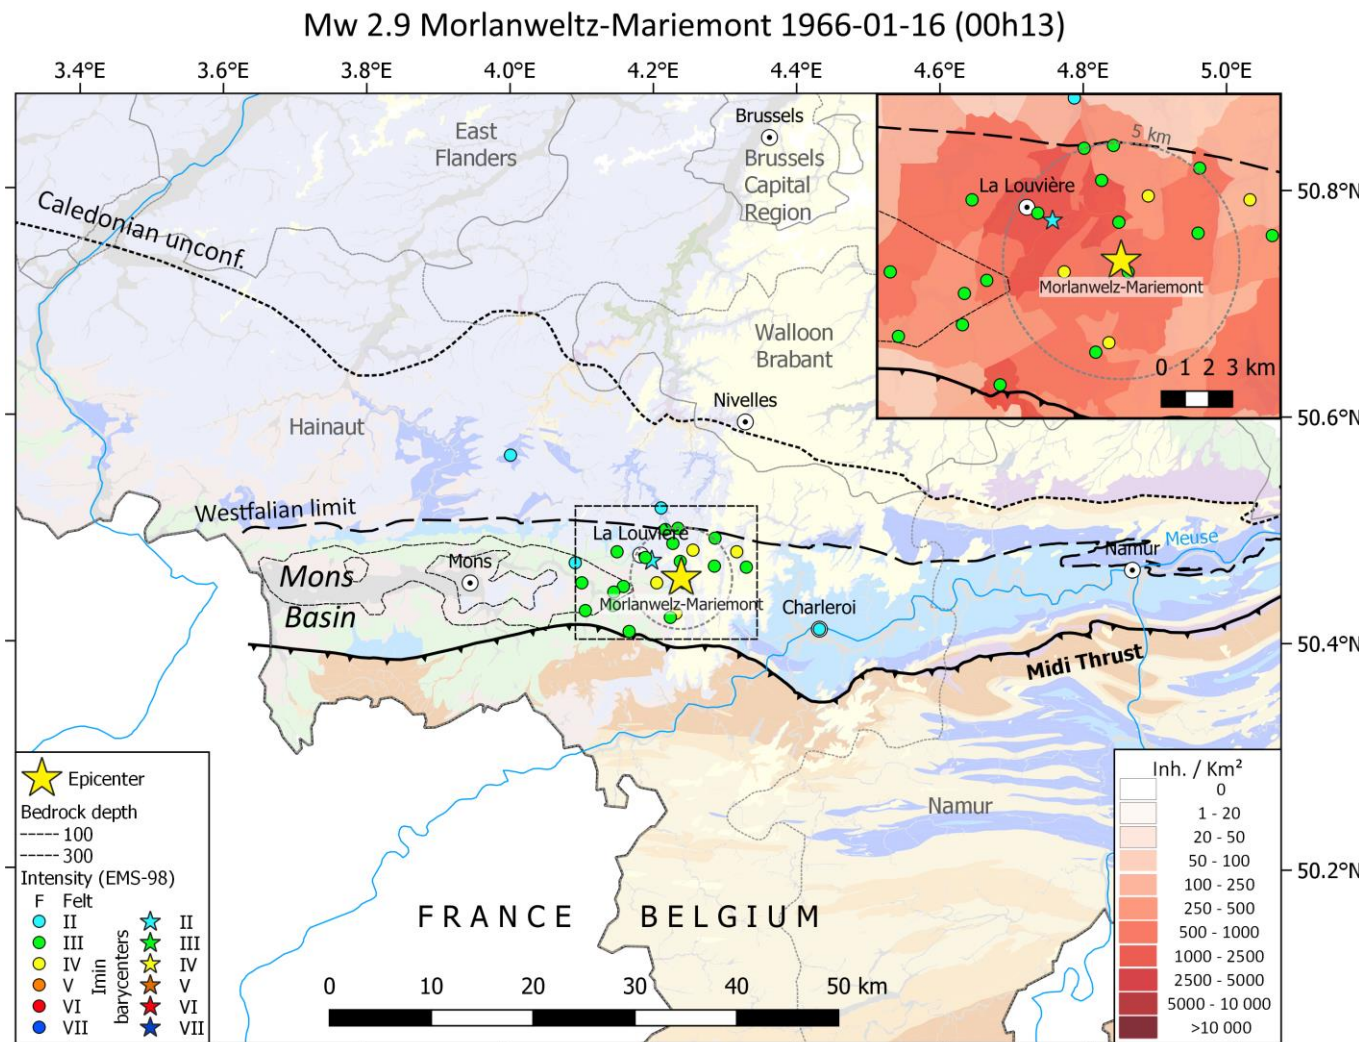

# Mw 3.5 Morlanwelz-Mariemont 1966-01-16 (06h51)

**Figure S19**

**Right)** Macroseismic map of the 1966 Mw=3.5 ( $M_L=3.8$ ) Morlanwelz-Mariemont earthquake (nr 19 in Table S1). Maximal intensity = V. Intensity data available in Table S2 in this Atlas.

**Below)** Intensity attenuation expressed as mean intensity change relative to  $I_0$  (blue dots) calculated for bins of 2.5 km (histogram). Blue dots are used in the attenuation modelling. Vertical blue bars show intensity standard deviation for each distance bin. Modelled epicentral intensity strength ( $I_0$ ) and focal depth (Z) for the event are indicated in the legend.

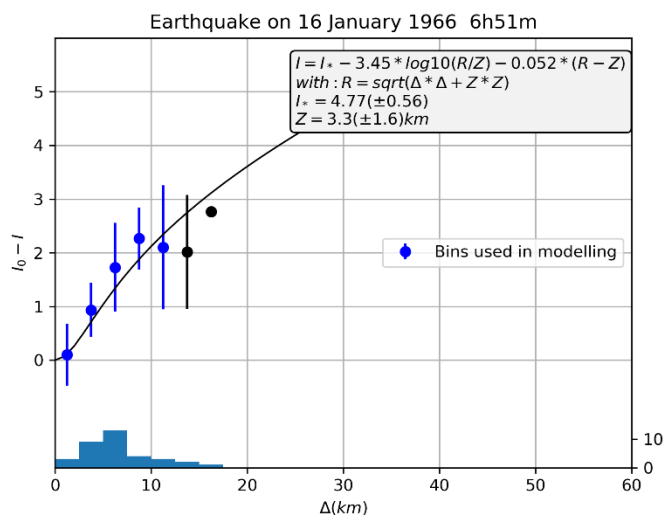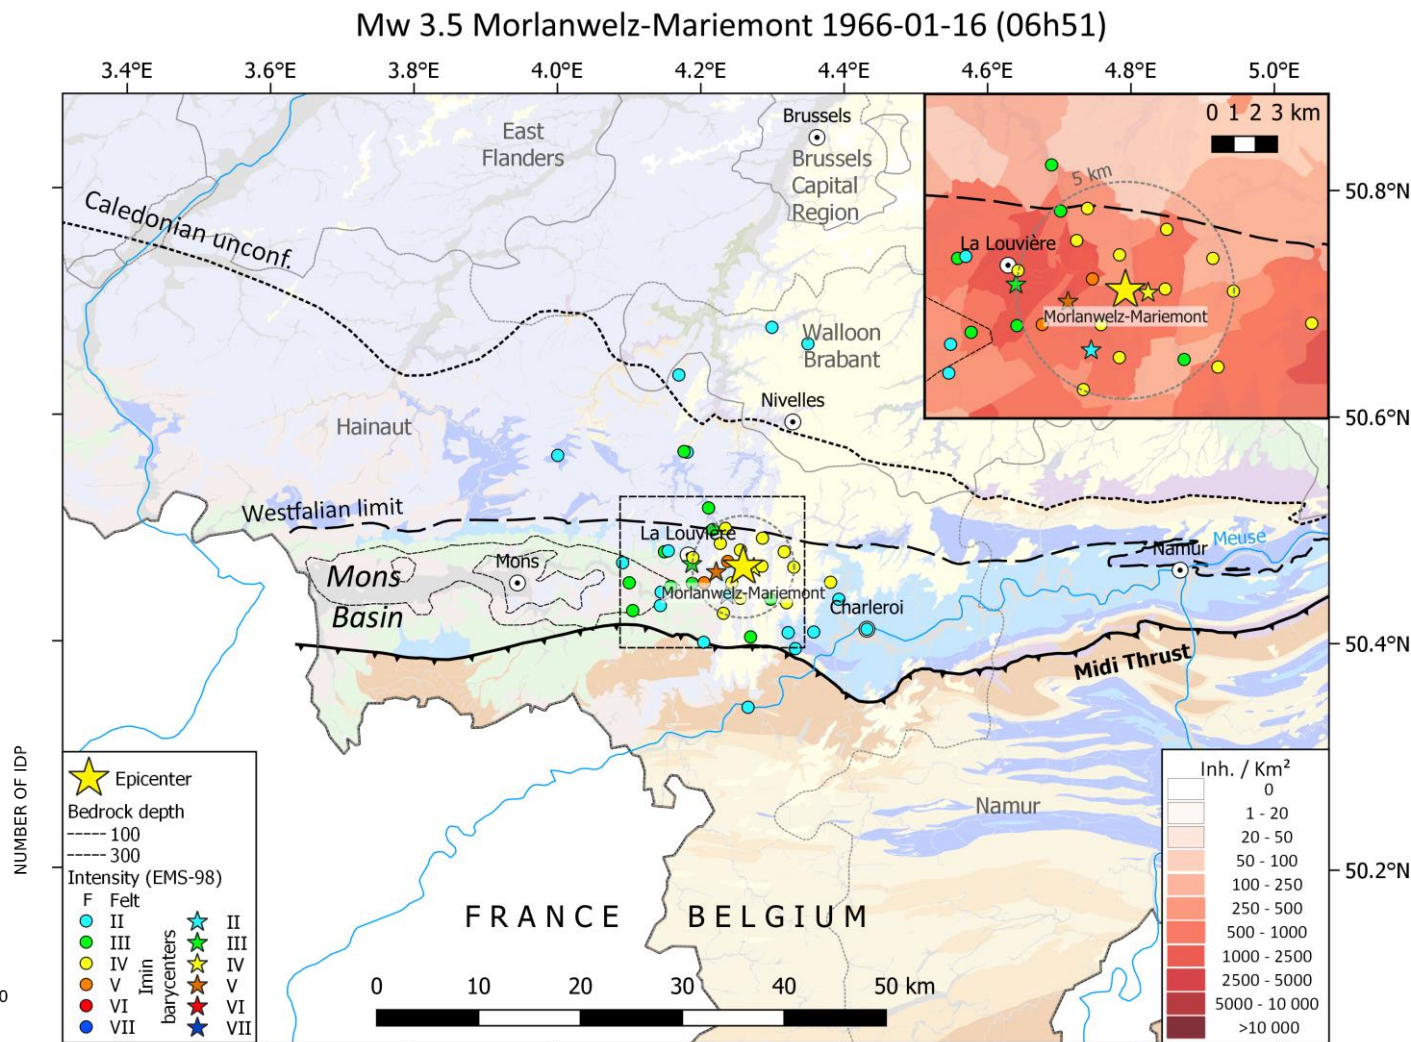

# Mw 4.0 Morlanwelz-Mariemont 1966-01-16 (12h32)

**Figure S20**

**Right)** Macroseismic map of the 1966 Mw=4.0 ( $M_L=4.4$ ) Morlanwelz-Mariemont earthquake (nr 20 in Table S1). Maximal intensity = VII. The inset shows localities where damage has been reported in press reports. Intensity data available in Table S2 in this Atlas.

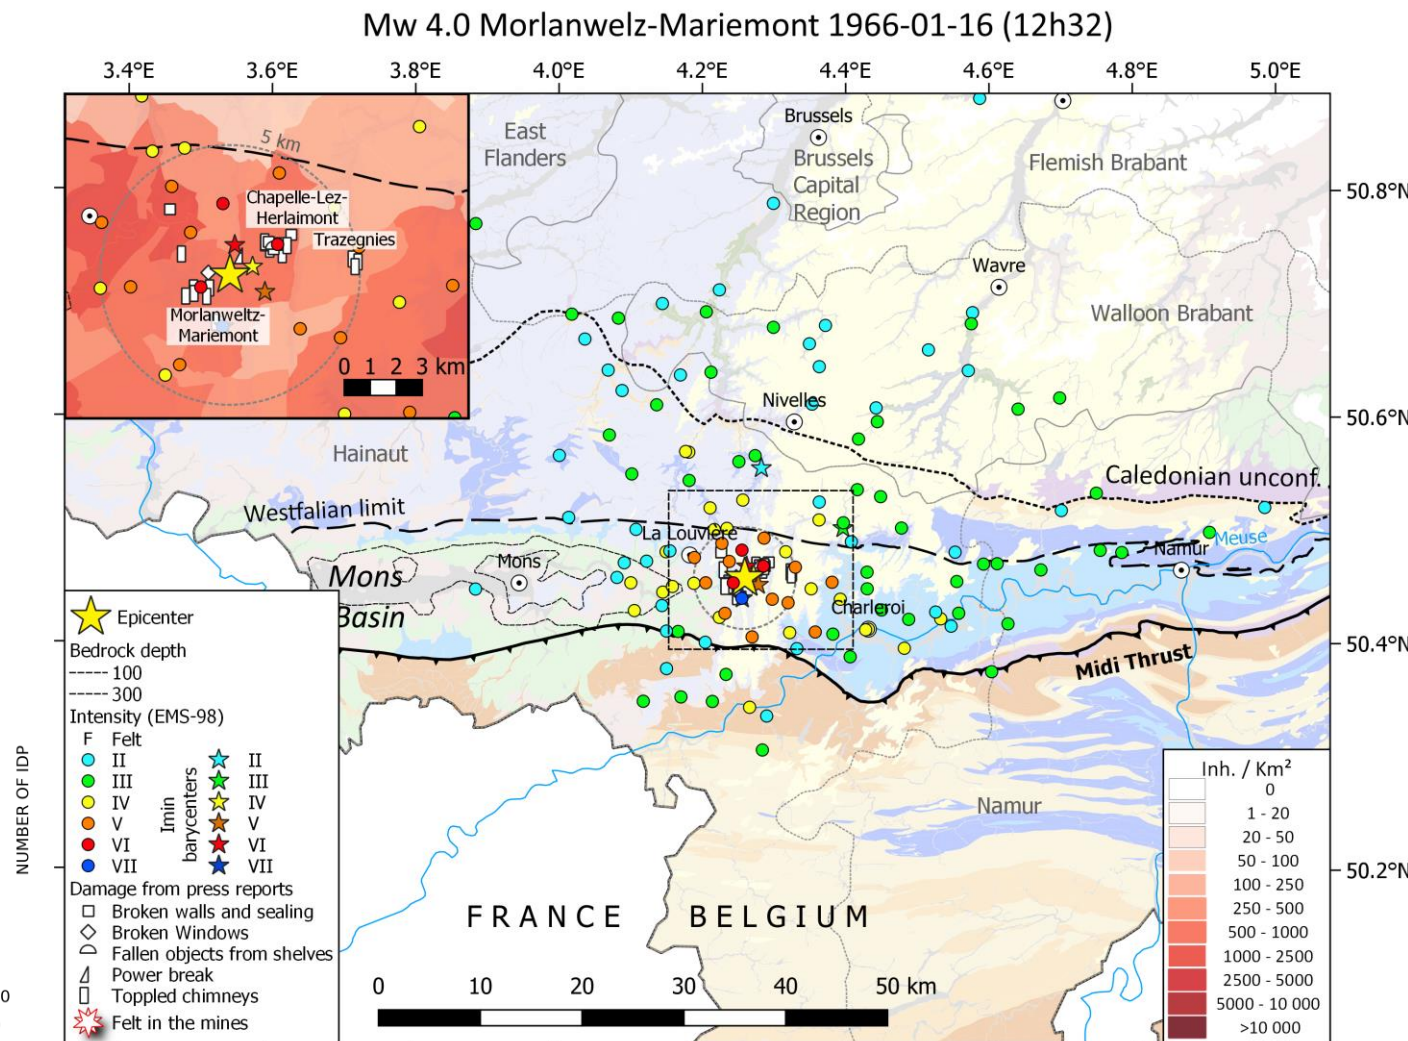

Earthquake on 16 January 1966 12h32m

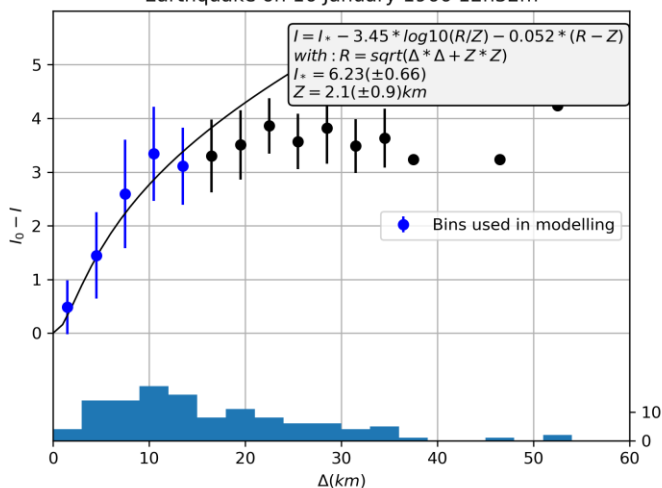

# Mw 4.1 Carnières 1967-03-28 (15h49)

**Figure S21**

**Right)** Macroseismic map of the 1967 Mw=4.1 ( $M_L=4.5$ ) Carnières earthquake (nr 21 in Table S1). Maximal intensity = VII. This event has been felt more northwards within the borders of the Brabant Massif, than southwards in the Ardennes, which results in a northwards shift of the lower intensity (Imin IV, III and II) barycenters. The inset shows localities where damage has been reported in press reports. Intensity data available in Table S2 in this Atlas.

**Below)** expressed as mean intensity change relative to  $I_0$  (blue dots) calculated for bins of 2.5 km (histogram).

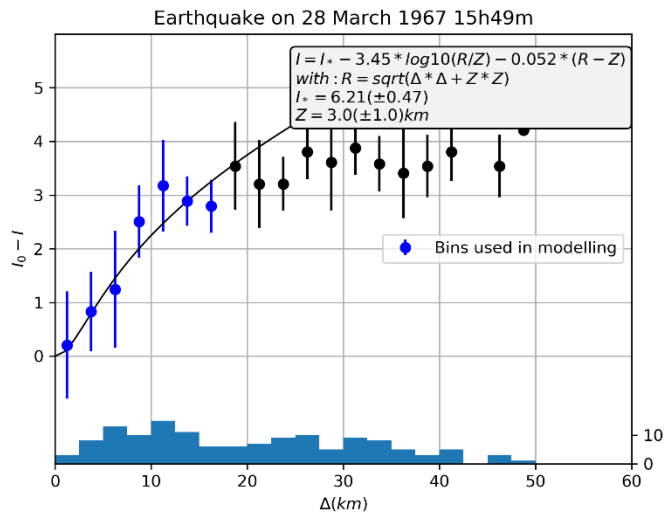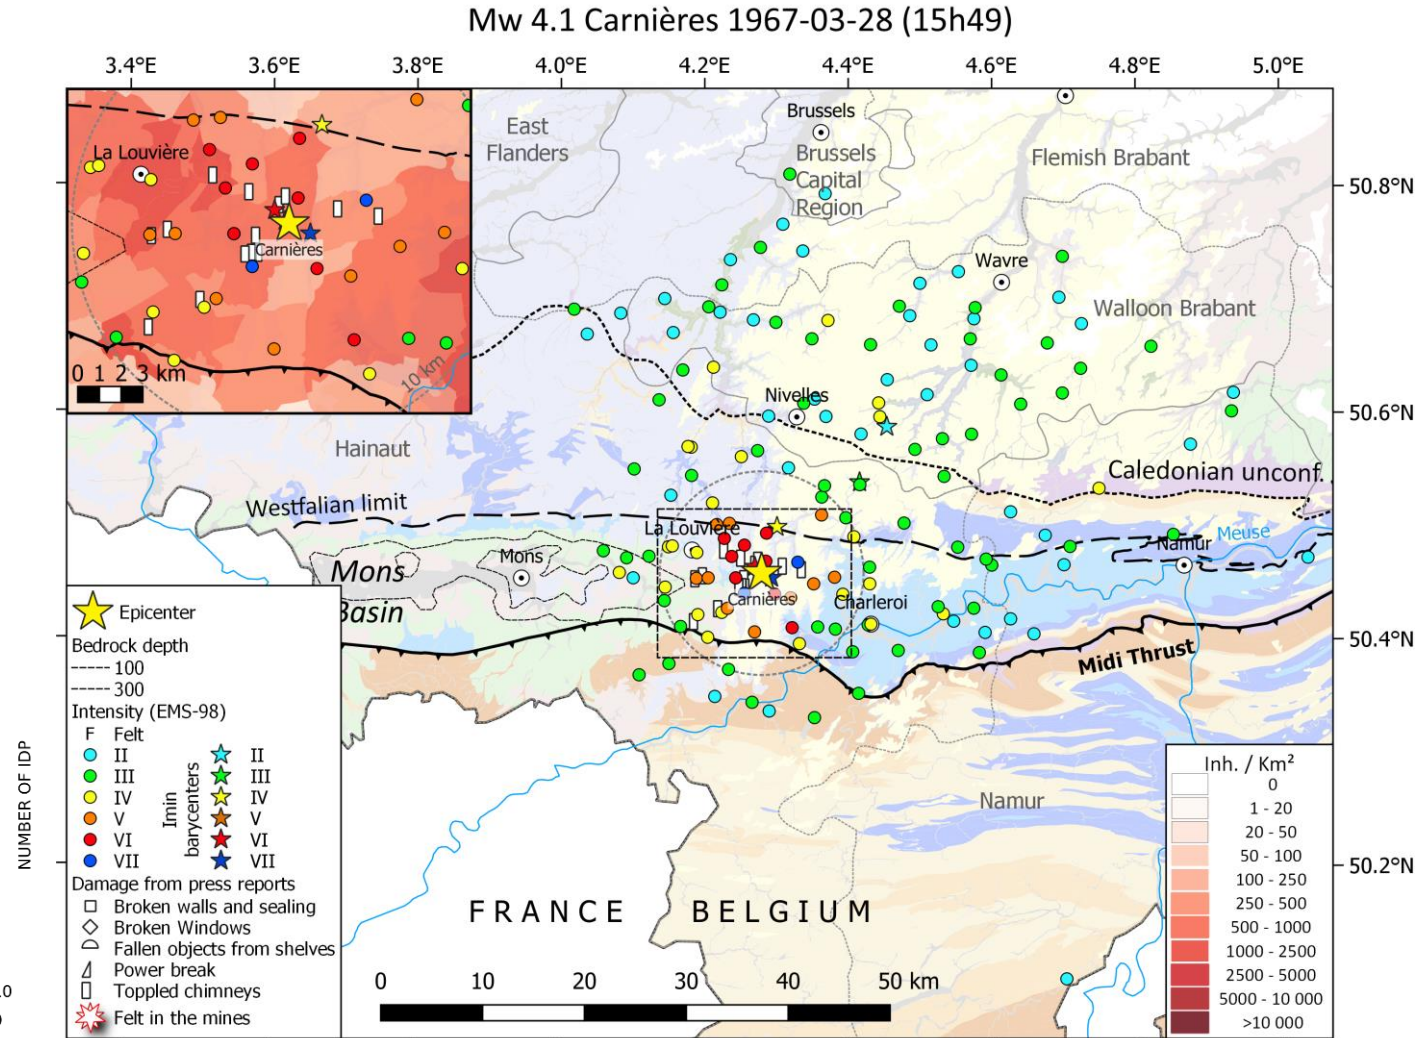

# Mw 3.6 La Louvière 1968-08-12 (07h26)

**Figure S22**

**Right)** Macroseismic map of the 12 August 1968 Mw=3.6 ( $M_L=3.7$ ) earthquake near La Louvière (nr 22 in Table S1). Maximal intensity = VII. Intensity data available in Table S2 in this Atlas.

**Below)** Intensity attenuation expressed as mean intensity change relative to  $I_0$  (blue dots) calculated for bins of 2.5 km (histogram). Blue dots are used in the attenuation modelling. Vertical blue bars show intensity standard deviation for each distance bin. Modelled epicentral intensity strength ( $I_0$ ) and focal depth ( $Z$ ) for the event are indicated in the legend.

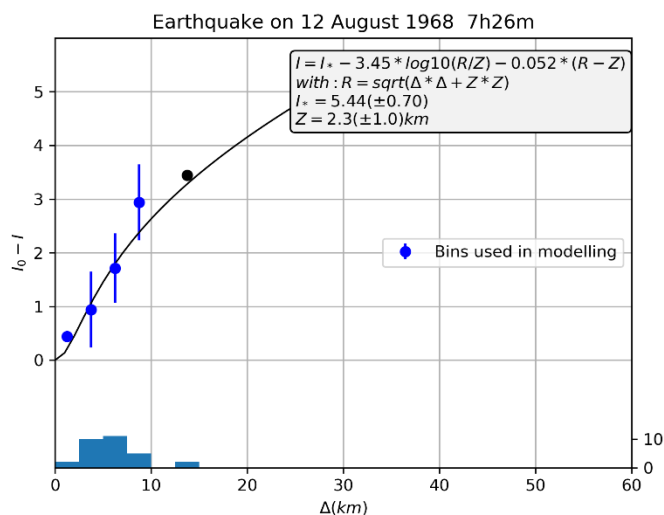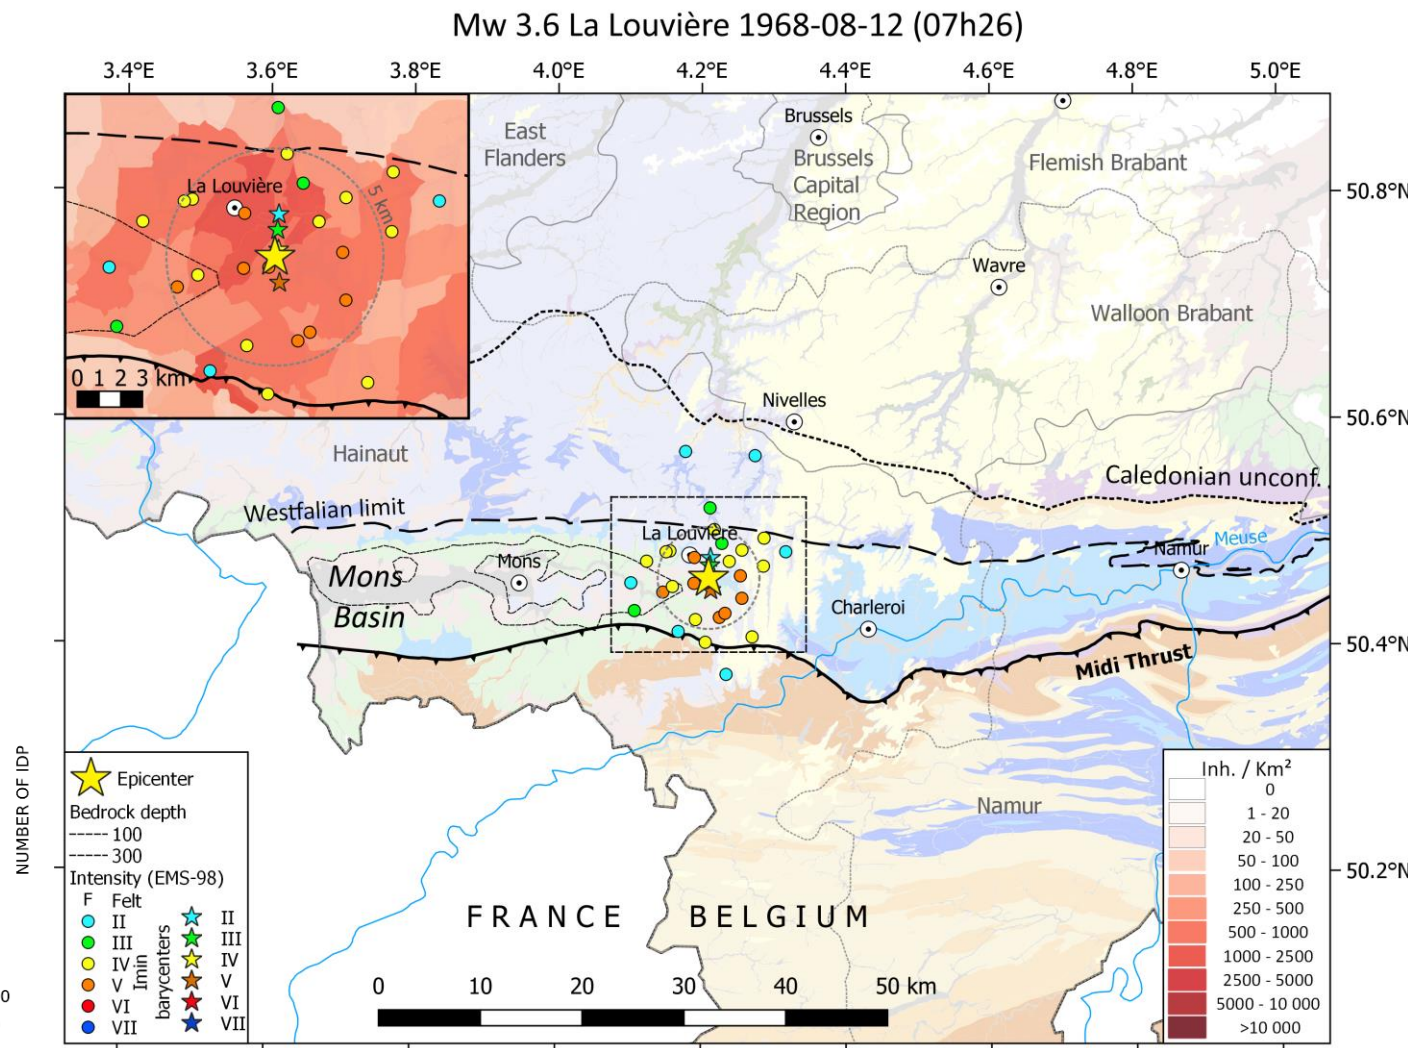

Geology in background based upon <http://www.onegeology.org/>. Reproduced with the permission of OneGeology. All rights Reserved.

# Mw 3.9 La Louvière 1968-08-13 (16h57)

**Figure S23**

**Right)** Macroseismic map of the damaging 13 August 1968 16h53 Mw=3.9 ( $M_L=4.1$ ) earthquake near La Louvière (nr 23 in Table S1). Maximal intensity = VII. The inset shows localities where damage has been reported in press reports. Intensity data available in Table S2 in this Atlas.

**Below)** Intensity attenuation expressed as mean intensity change relative to  $I_0$  (blue dots) calculated for bins of 2.5 km (histogram). Blue dots are used in the attenuation modelling. Vertical blue bars show intensity standard deviation for each distance bin. Modelled epicentral intensity strength ( $I_0$ ) and focal depth ( $Z$ ) for the event are indicated in the legend.

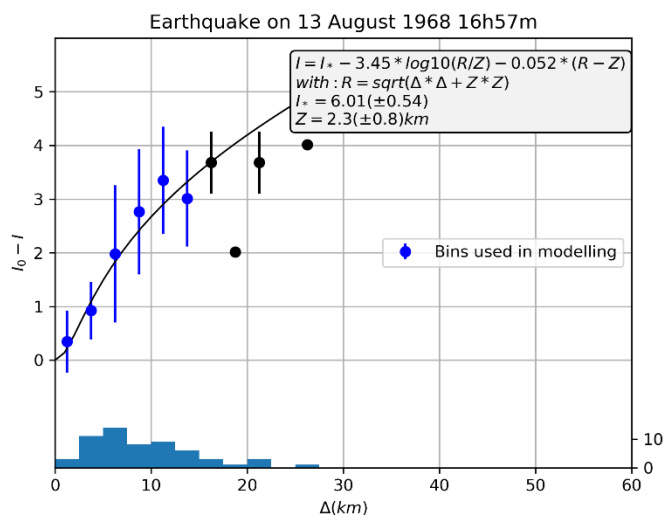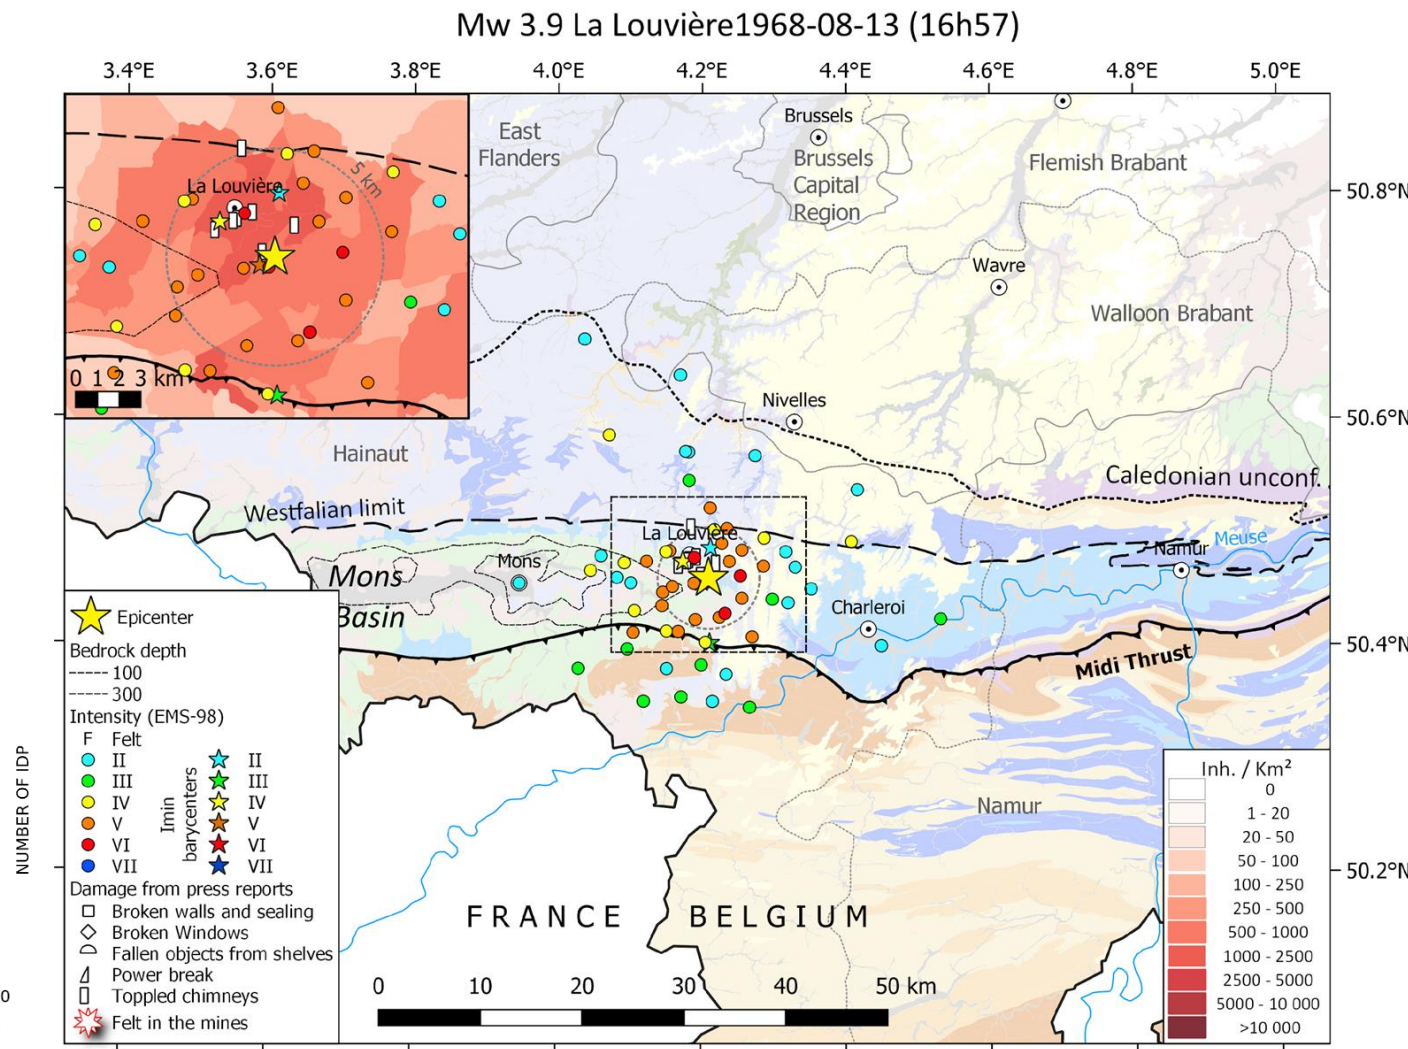

Geology in background based upon <http://www.onegeology.org/>. Reproduced with the permission of OneGeology. All rights Reserved.

# Mw 3.2 Morlanwelz-Mariemont 1968-09-23 (04h08)

**Figure S24**

**Right)** Macroseismic map of the damaging 23 September 1968 04h08 Mw=3.2 ( $M_L=3.0$ ) earthquake near Morlanwelz-Mariemont (nr 24 in Table S1). Maximal intensity = IV. Intensity data available in Table S2 in this Atlas.

**Below)** Intensity attenuation expressed as mean intensity change relative to  $I_0$  (blue dots) calculated for bins of 2.5 km (histogram). Blue dots are used in the attenuation modelling. Vertical blue bars show intensity standard deviation for each distance bin. Modelled epicentral intensity strength ( $I_0$ ) and focal depth ( $Z$ ) for the event are indicated in the legend.

Earthquake on 23 September 1968 4h08m

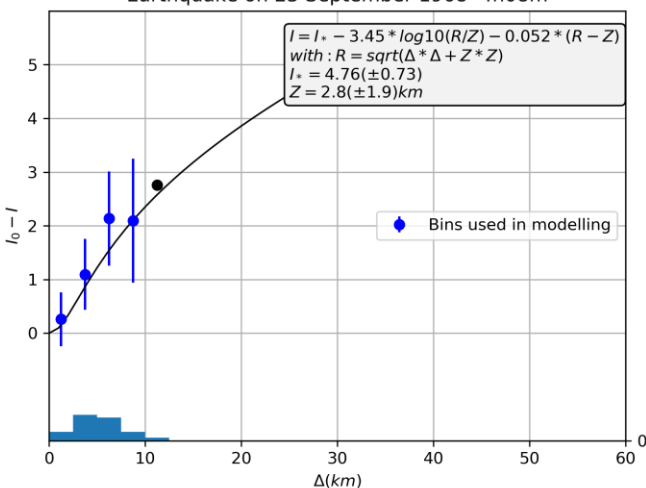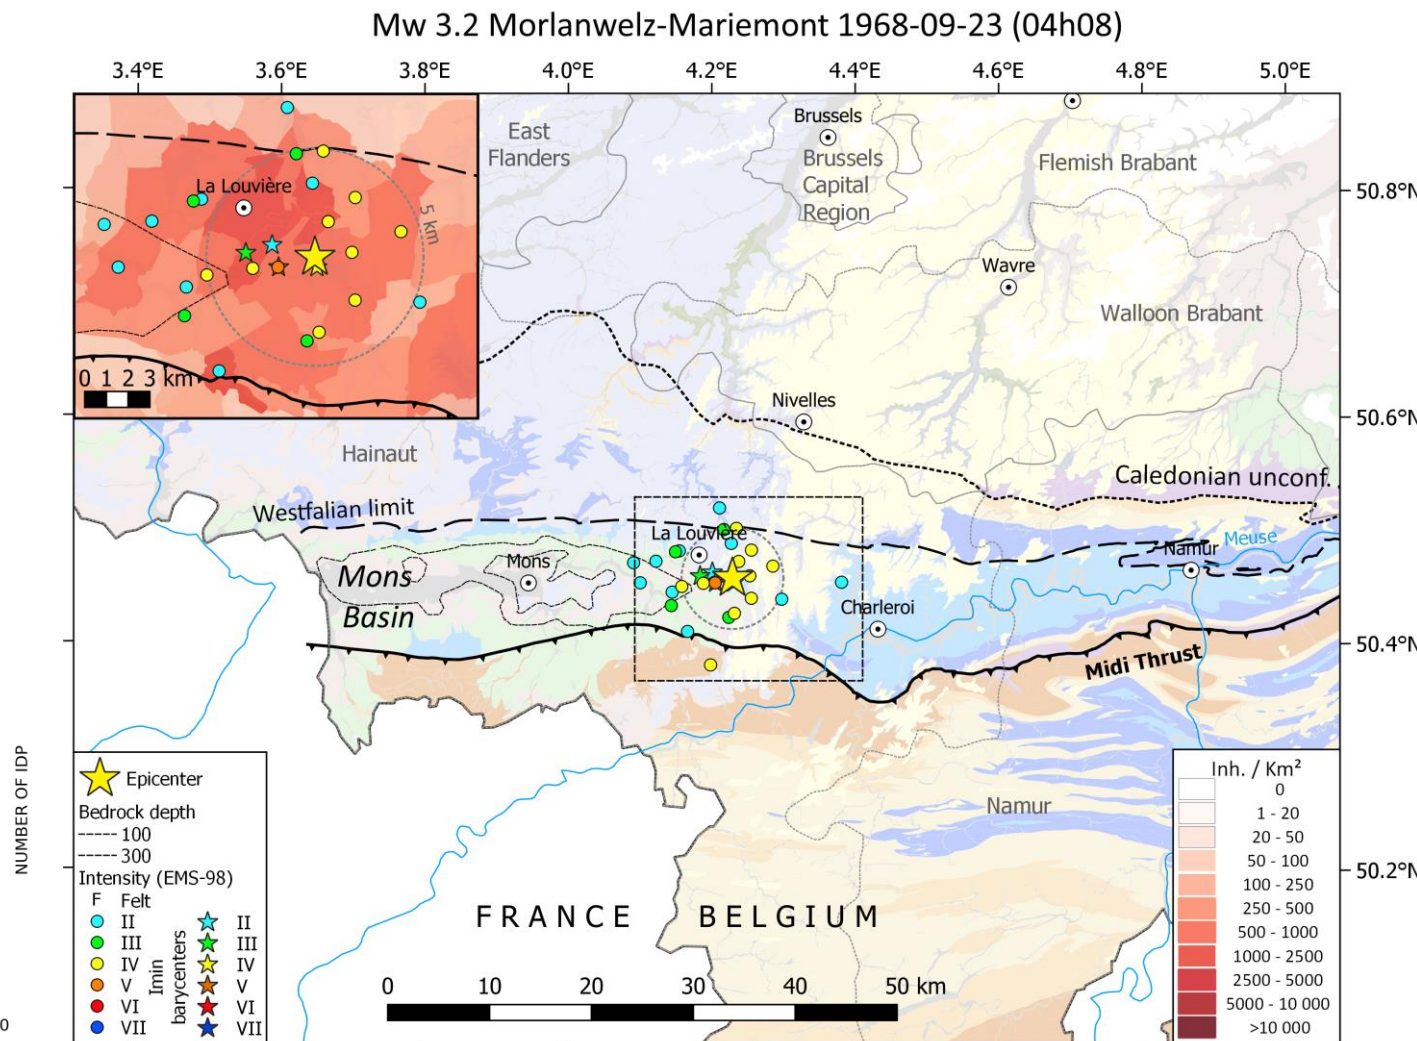

# Mw 3.0 Haine-Saint-Pierre 1968-09-23 (05h47)

**Figure S25**

**Right)** Macroseismic map of the damaging 23 September 1968 05h47 Mw=3.0 ( $M_L=2.9$ ) earthquake near Haine-Saint-Pierre (nr 25 in Table S1). Maximal intensity = IV. Intensity data available in Table S2 in this Atlas.

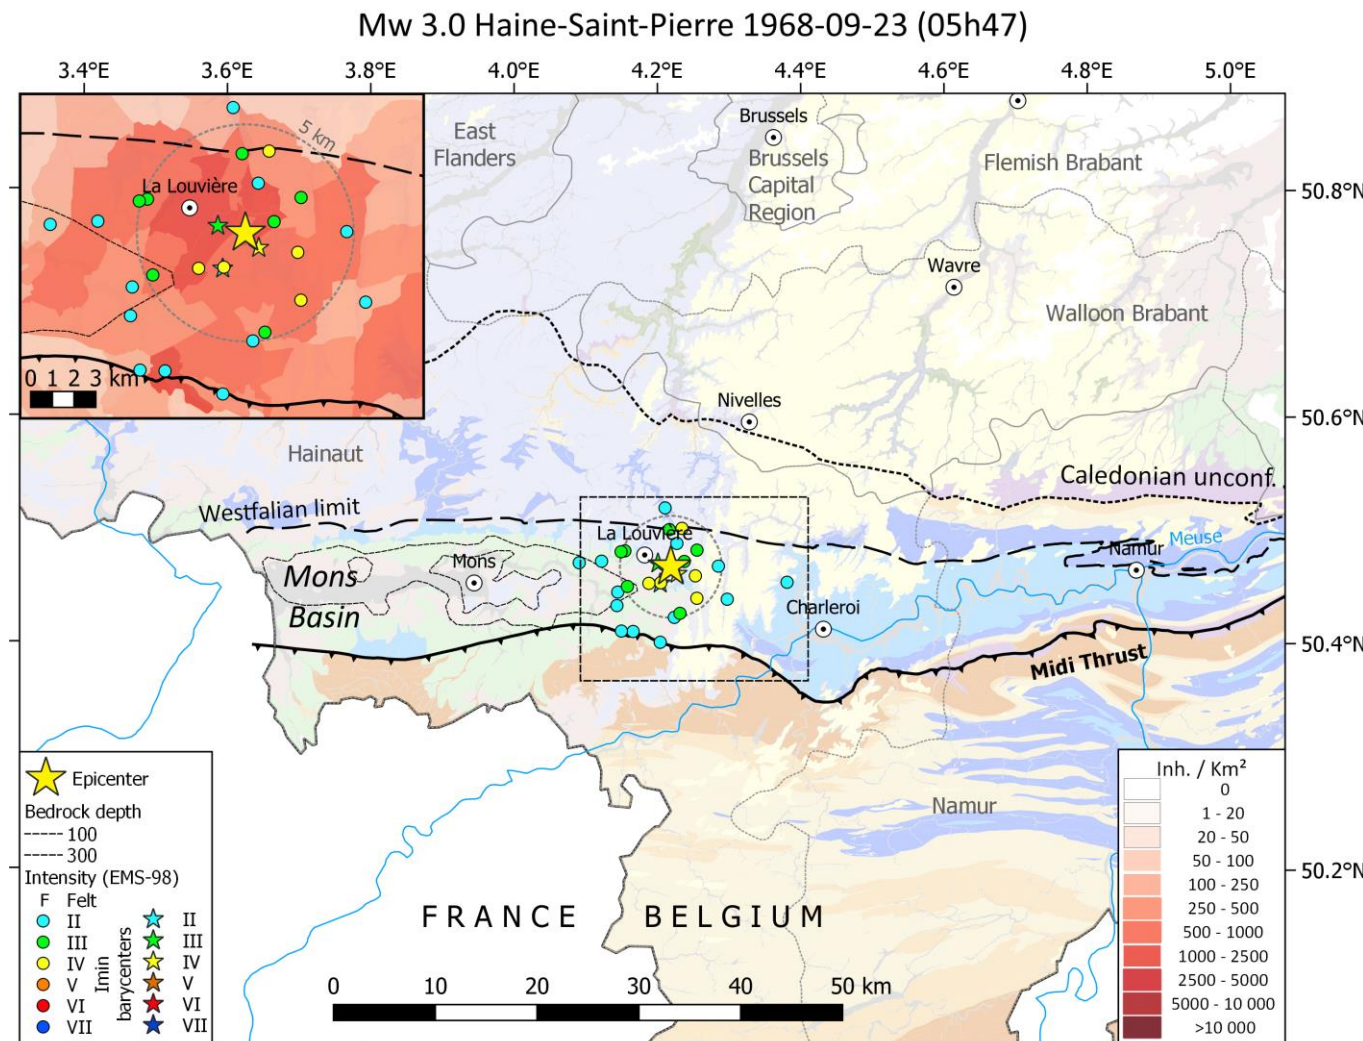

# Mw 3.6 Marchienne-au-Pont 1970-11-03 (08h45)

**Figure S26**

**Right)** Macroseismic map of the damaging 3 November 1970 Mw=3.6 ( $M_L=3.9$ ) earthquake south of Charleroi (nr 26 in Table S1). Maximal intensity = V. Intensity data available in Table S2 in this Atlas.

**Below)** Intensity attenuation expressed as mean intensity change relative to  $I_0$  (blue dots) calculated for bins of 2.5 km (histogram). Blue dots are used in the attenuation modelling. Vertical blue bars show intensity standard deviation for each distance bin. Modelled epicentral intensity strength ( $I_0$ ) and focal depth (Z) for the event are indicated in the legend.

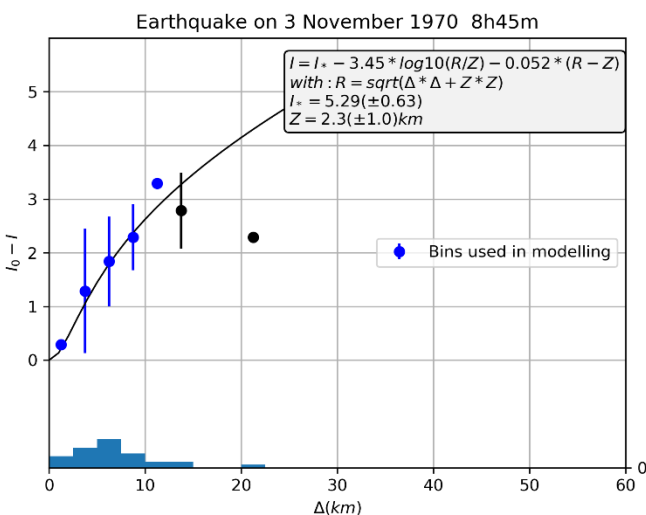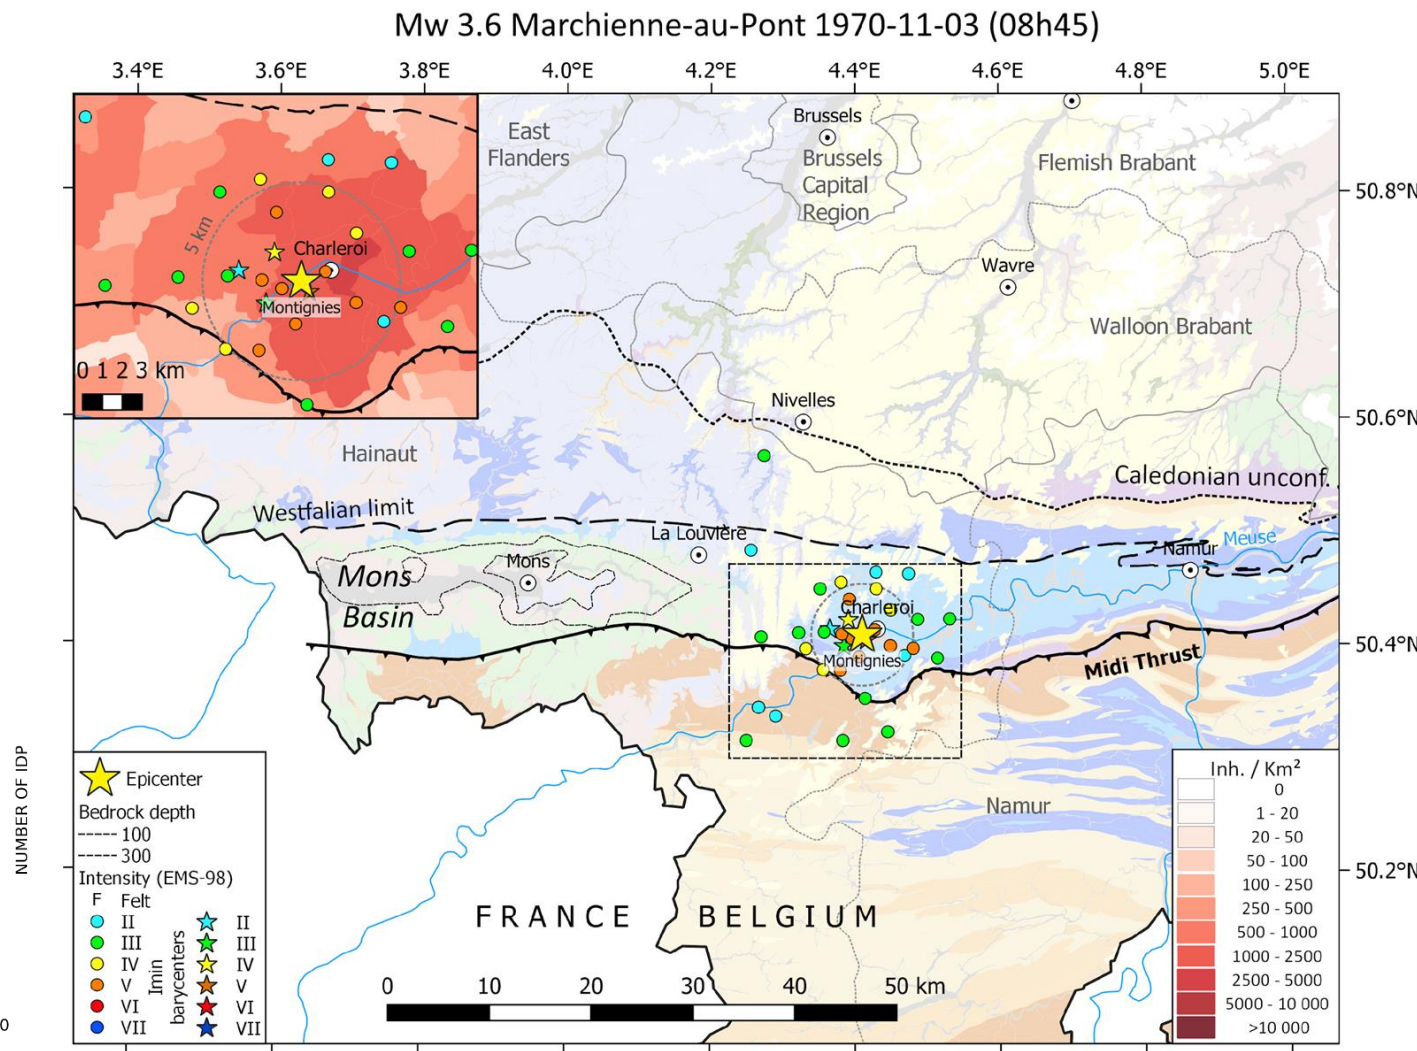

Geology in background based upon <http://www.onegeology.org/>. Reproduced with the permission of OneGeology. All rights Reserved.

# Mw 3.9 Givry 1976-10-24 (20h33)

**Figure S27**

**Right)** Macroseismic map of the 1976 Mw=3.9 ( $M_L=4.2$ ) Givry earthquake (nr 27 in Table S1). Because this event has been felt within the Hainaut coal mine area, intensity values are used for modelling. Maximal intensity = VI. Intensity data available in Table S2 in this Atlas.

**Below)** Intensity attenuation expressed as mean intensity change relative to  $I_0$  (blue dots) calculated for bins of 2.5 km (histogram). Blue dots are used in the attenuation modelling. Vertical blue bars show intensity standard deviation for each distance bin. Modelled epicentral intensity strength ( $I_0$ ) and focal depth ( $Z$ ) for the event are indicated in the legend.

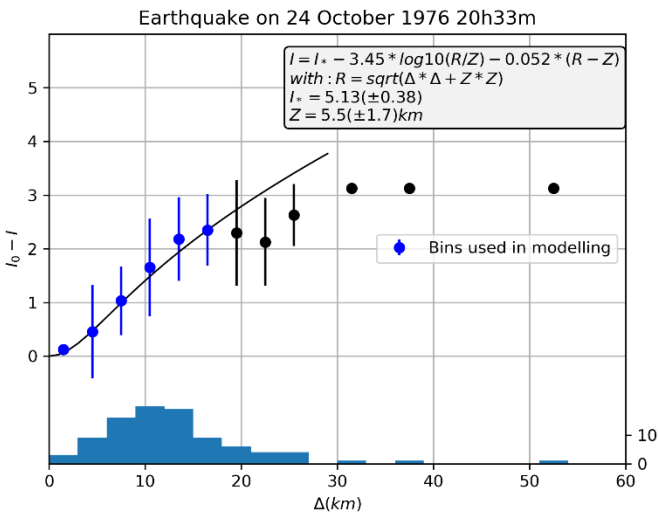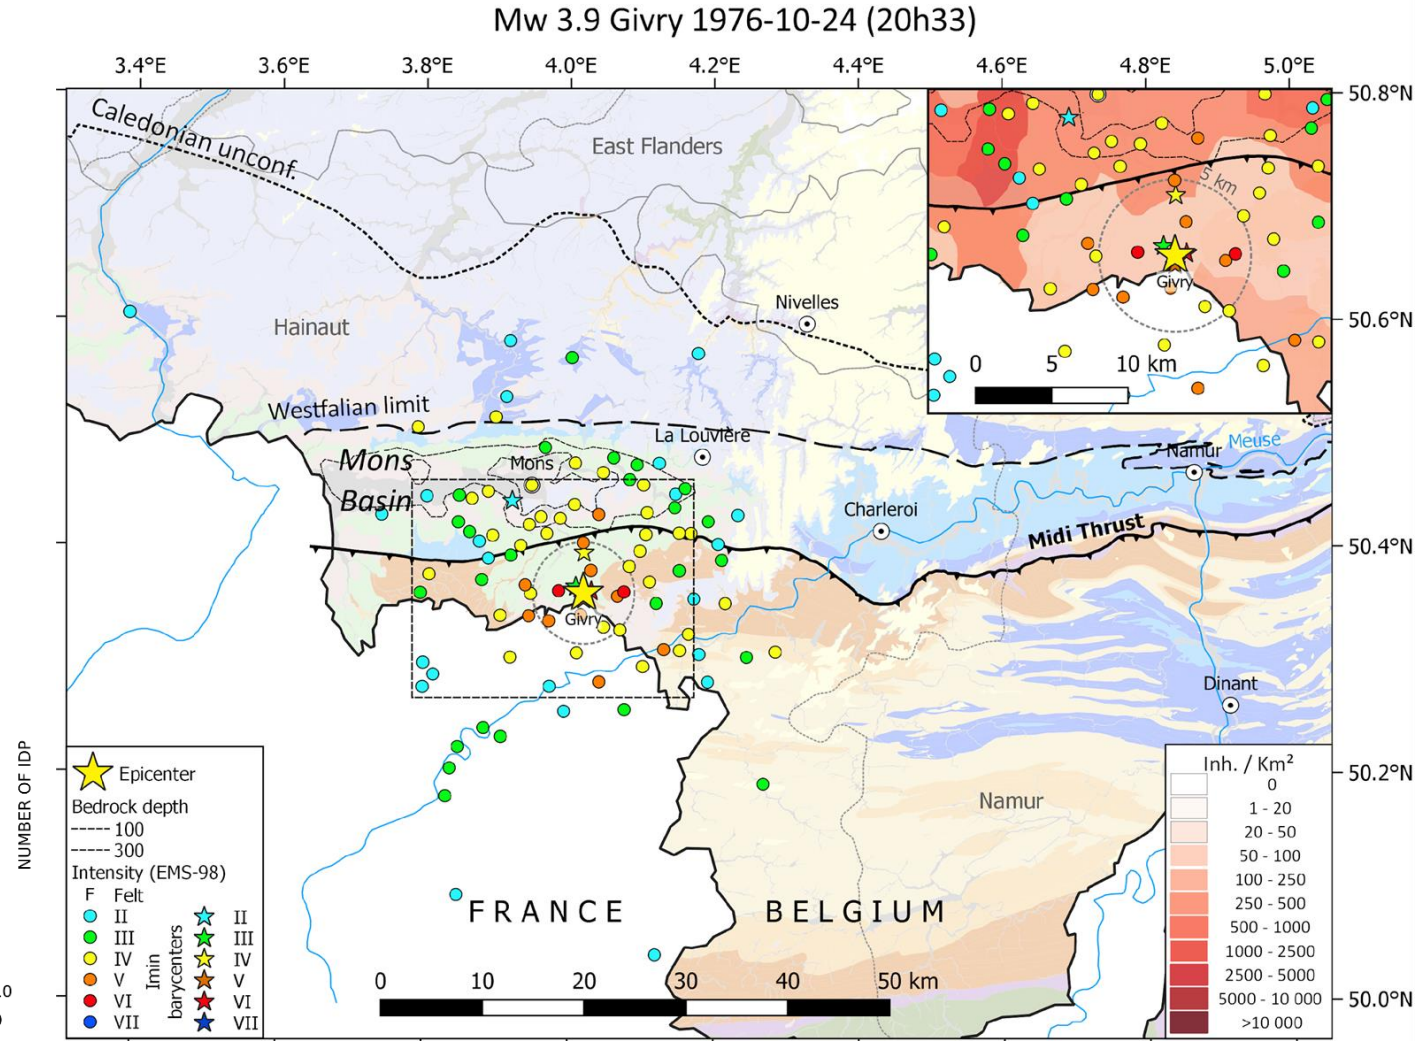

Geology in background based upon <http://www.onegeology.org/>. Reproduced with the permission of OneGeology. All rights Reserved.

# Mw 3.4 Carnières 1982-09-14 (19h24)

**Figure S28**

**Right)** Macroseismic map of the 14 September 1982 Mw=3.4 ( $M_L=3.4$ ) earthquake in Carnières (nr 28 in Table S1). Maximal intensity = IV. Intensity data available in Table S2 in this Atlas.

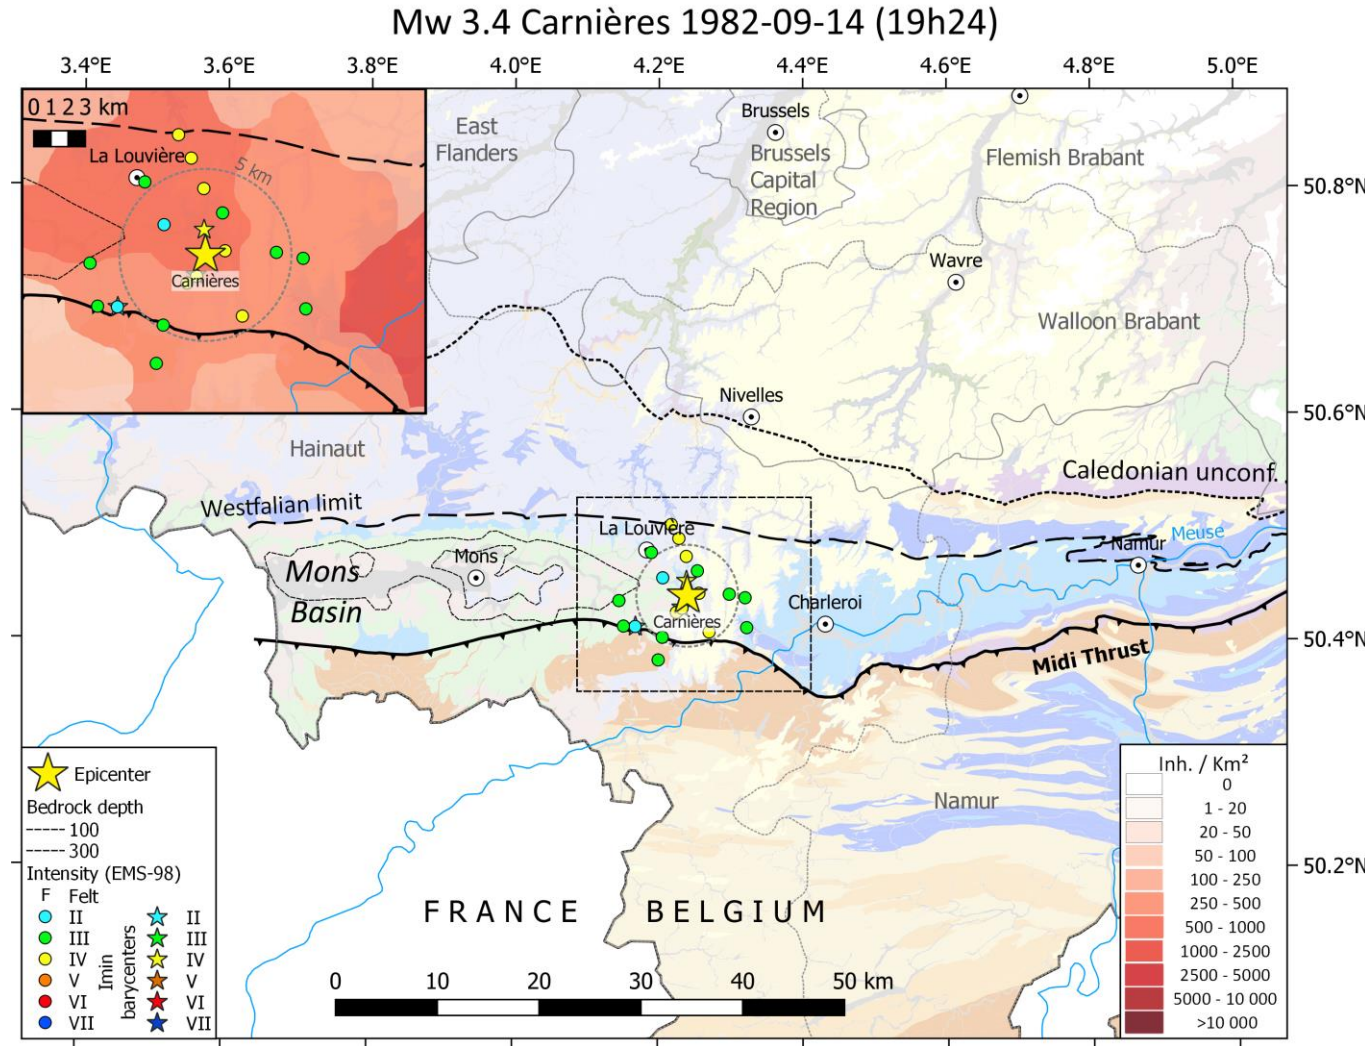

# Mw 4.6 Liège 1983-11-08 (00h49)

**Figure S29**

**Right)** Macroseismic map of the locally strongly damaging 8 November 1983 Mw=4.6 ( $M_L=5.0$ ) earthquake in Liège felt across the whole coal basin. Maximal intensity = VII. Intensity data available in Camelbeeck *et al.* 2021. *Journal of Seismology*.

**Below)** Intensity attenuation expressed as mean intensity change relative to  $I_0$  (blue dots) calculated for bins of 2.5 km (histogram). Blue dots are used in the attenuation modelling. Vertical blue bars show intensity standard deviation for each distance bin. Modelled epicentral intensity strength ( $I_0$ ) and focal depth ( $Z$ ) for the event are indicated in the legend.

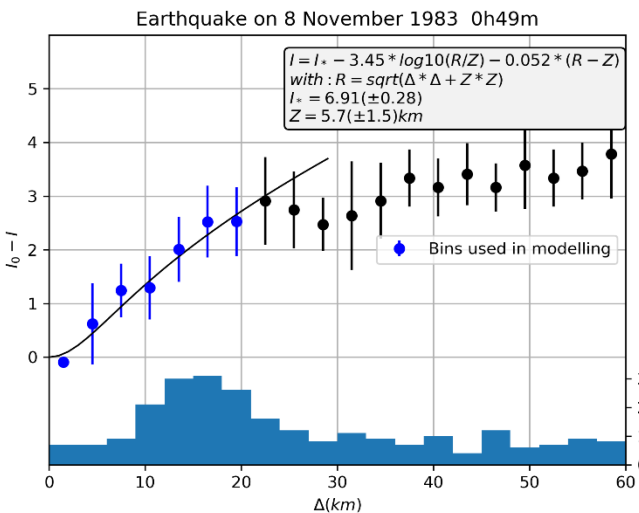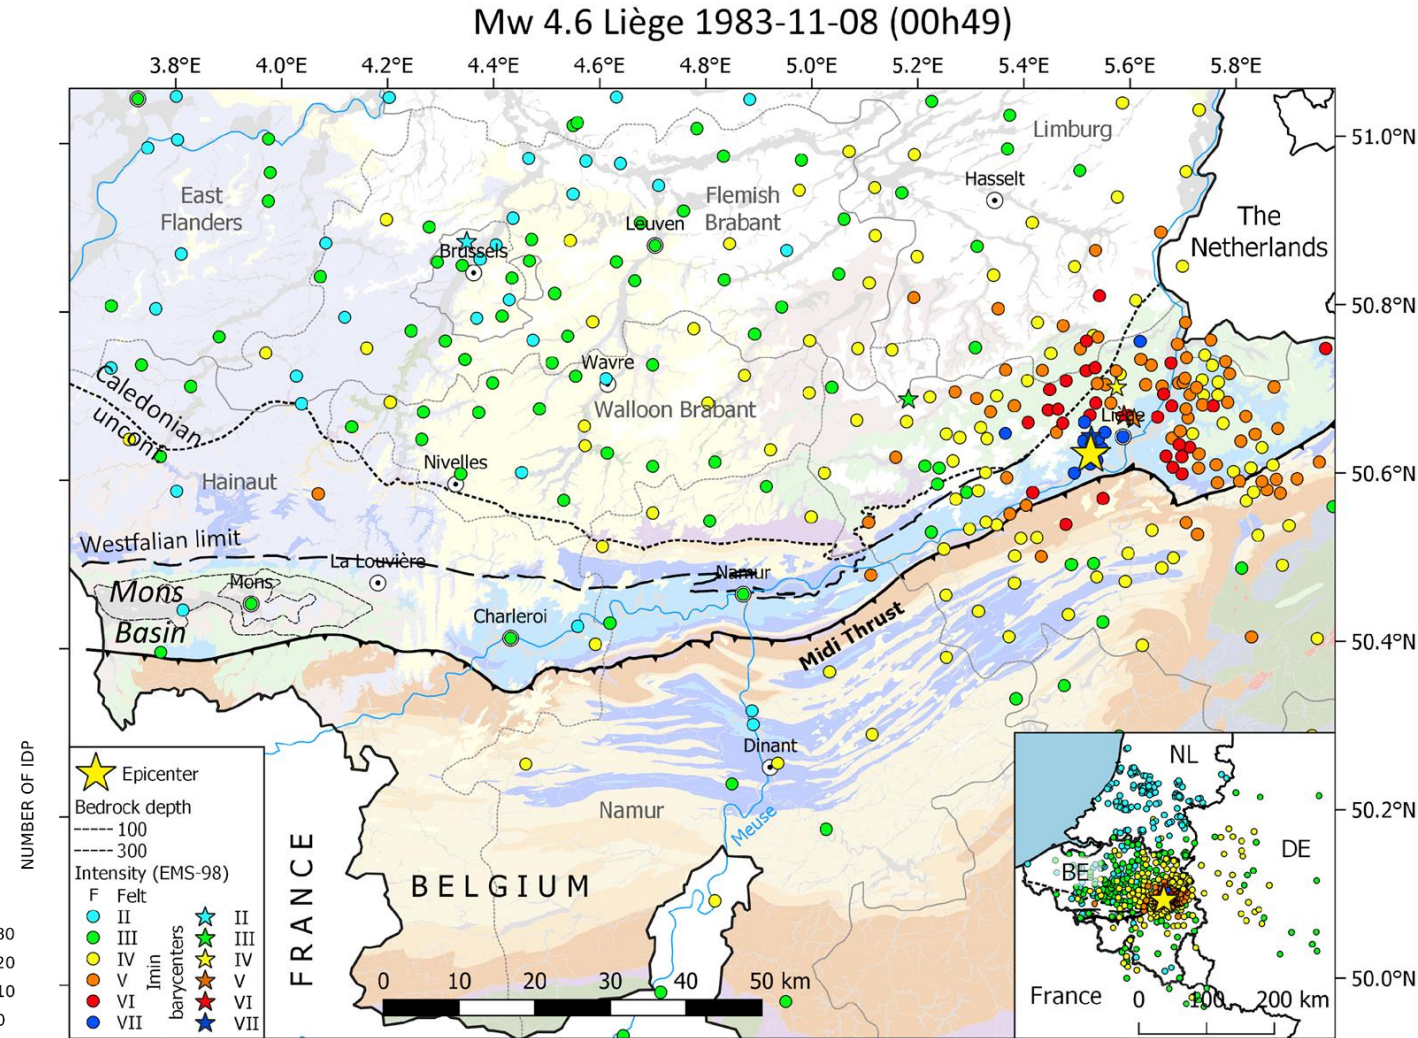

Geology in background based upon <http://www.onegeology.org/>. Reproduced with the permission of OneGeology. All rights Reserved.

# Mw 5.0 Zulzeke-Nukerke 1938-06-11 (10h57)

**Figure S30**

**Right)** Macroseismic map of the strongly damaging 11 June 1938  $M_L=5.6$  earthquake in Zulzeke-Nukerke in the Brabant Massif, felt widely in whole NW Europe. This event was locally caused damage in in the whole coal basin. Maximal intensity = VII.

Intensity data of this earthquake available in Camelbeeck et al. 2021. *The 23 February 1828 Belgian earthquake: a destructive moderate event typical of the seismic activity in Western Europe. Journal of Seismology Journal of Seismology.* [DOI](#)

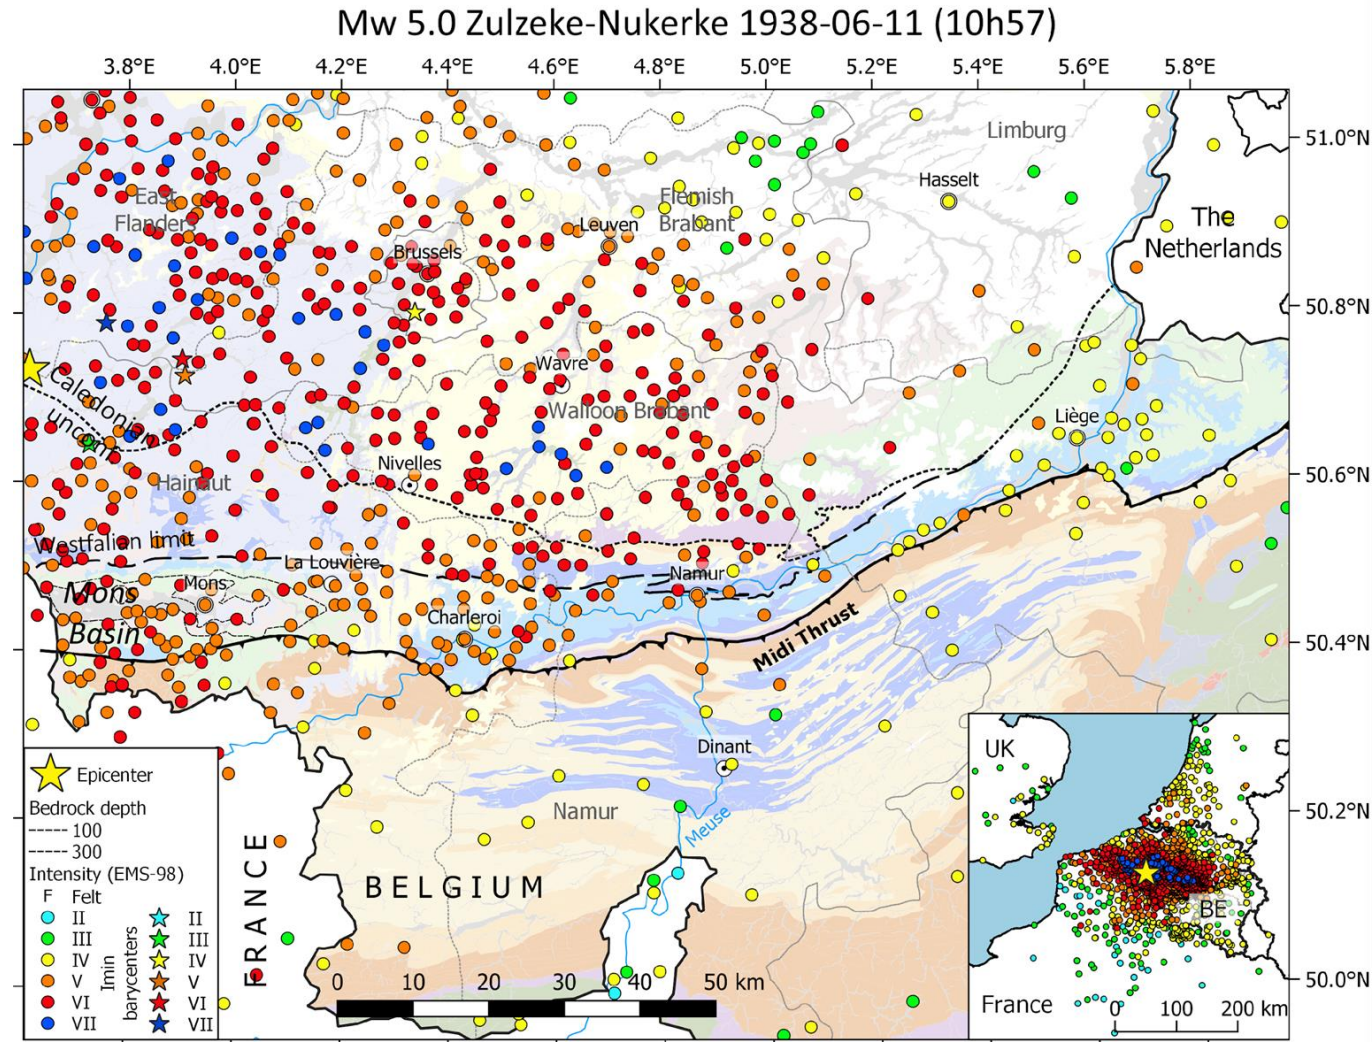

# Mw 4.1 Le Roeulx 1995-06-20 (01h54)

**Figure S31**

**Right)** Macroseismic map of the slightly damaging 20 June 1995  $M_L=4.5$  earthquake in Le Roeulx, felt across whole Belgium and in northern France. This event was also perceived in the whole coal basin. Maximal intensity = V.

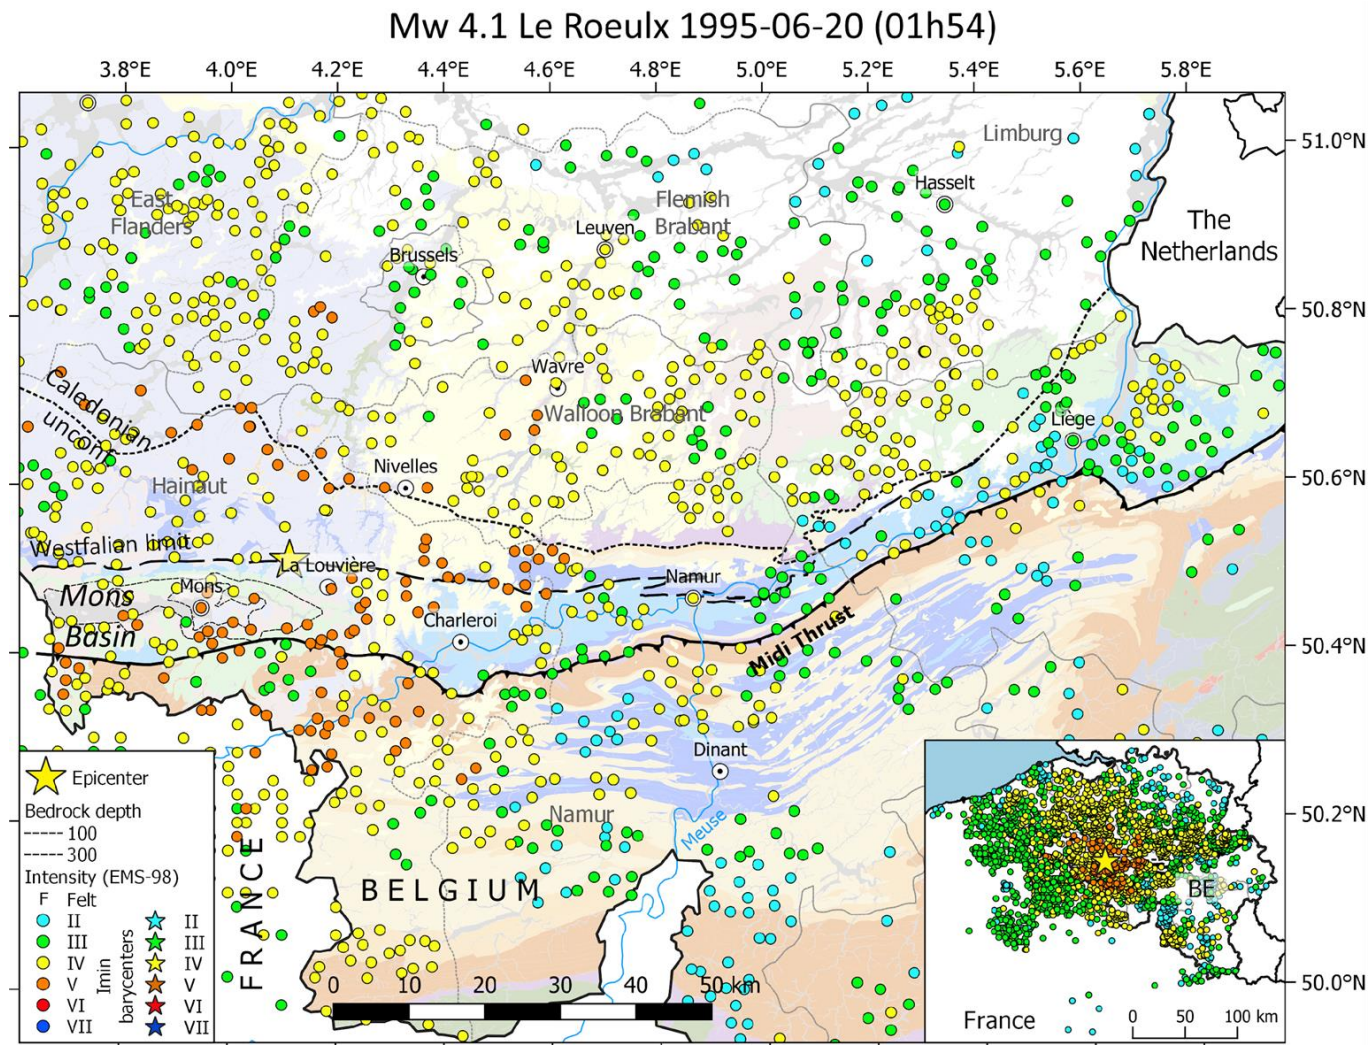

# 3. Sources of macroseismic information on the Hainaut Earthquakes

(records, scientific papers, bulletins, macroseismic inquiries and press papers)

## 1. Scientific studies

Our first source of information on the effects and (or) damage caused by the Hainaut earthquakes are the published scientific works contemporaneous with the earthquakes. The first earthquakes mentioned in the Hainaut coal area occurred in 1887 in the locality of Havré, a few km E of the city of Mons (Fig. 2). de Munck (1887) provided a scientific investigation about these earthquakes. They were only felt in a small radius of perceptibility (1 to 2 km), suggesting a very shallow source. The absence of scientific documentation before these events does not mean that earthquakes have not previously occurred there or in other parts of the Hainaut coal area. Nevertheless, at least since the beginning of the 19th century, it is doubtful that damaging earthquakes would have escaped the attention of local authorities or the press because some 19th century earthquakes that occurred in neighbouring regions were reported by historical sources mentioning their effects in Hainaut. An example is the MW=5.1 23 February 1828 earthquake in Central Belgium (Fig. 1) that was felt in underground mines in the Borinage and caused damage to chimneys in Gosselies (Camelbeeck et al., 2021).

With the exception of Marlière (1951), who exclusively investigated the effects of the 3 April 1949 Havré earthquake in Mons-Borinage region (Fig. 2), other scientific studies provide information on the earthquake's effects in the whole felt area. Some works, including Marlière (1951), contain the own observations of the author(s), complemented by testimonies collected by interviewing local people, similar as today's Macroscopic Intervention Group (Sira, 2015) would do. Cornet (1911) based his analysis of the 12 April 1911 earthquake in the Mons area on an inquiry submitted to 150 people, including teachers, engineers and priests, spread over a larger area than the one where people reported the shaking, according to local newspapers.

Cambier (1911) personally verified most of the information published in the local press for the 1 June 1911 earthquake, which was strongly felt in the localities north of the city of Charleroi. Capiou (1920) essentially reports the author's eyewitnesses complemented with a few additional information he collected himself on the 17 January 1920 earthquake felt in the Borinage.

Charlier (1949) and Van Gils (1966), as heads of the seismological service of the ROB, provided an analysis respectively of the 3 April 1949 Havré, and the 15 December 1965 and 16 January 1966 near the city of La Louvière, from the official ROB macroseismic surveys to the local authorities. The Geological laboratory of the Mining School of Mons conducted a survey on the earthquakes that occurred in the Borinage in March 1933. Their questionnaire appeared in the newspaper "Le Soir" of the 8 March 1933, but the analysis of the survey was not the object of any scientific paper. Damaging earthquakes, such as the 3 June 1911 in Gosselies, 28 March 1967 in Carnières and 13 August 1968 in La Louvière, have not been the topic of specific scientific publications describing their impact and associated damage

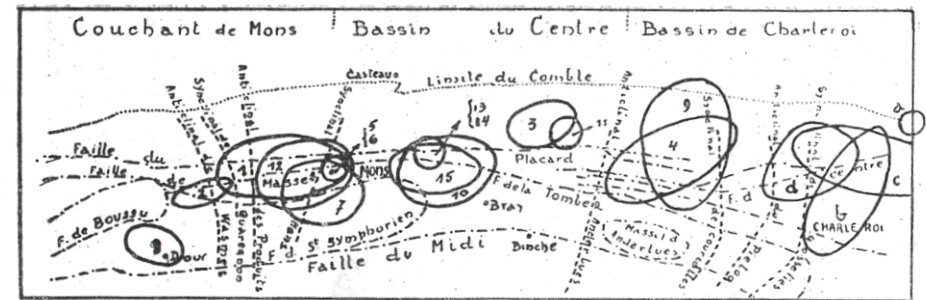

Overview of seismicity in the Hainaut coal basin. Charlier 1951. Académie royale de Belgique, Bulletin de la classe des Sciences, pp. 640–649, 1951.

# 3. Sources of macroseismic information on the Hainaut Earthquakes

(records, scientific papers, bulletins, macroseismic inquiries and press papers)

## 2. The official survey of the Royal Observatory of Belgium

Macroseismic surveys are an indispensable tool to map earthquake's effects and have the purpose to understand their importance in function of magnitude, epicentral distance, focal depth, local geological conditions and other factors (Cecic and Musson, 2004). Since 1932, the ROB has organised a macroseismic survey whenever an earthquake is felt in Belgium. To ensure collecting information on the entire macroseismic field, surveys had to span a sufficiently large territory. For the Hainaut earthquakes, the surveys consisted of sending questionnaires to the burgomasters of Belgian communes up to 50 km from the observed macroseismic epicentres. In the case of damaging earthquakes, the survey is an important document because the Belgian authorities and insurance companies consider it to decide if damage repairing costs can be reimbursed.

Between 3 April 1949 and 9 August 1983, 19 earthquakes in the Hainaut coal area were the subject of an official ROB inquiry and 17 events are usable for intensity evaluation (*inq* in Table 1). The questionnaire form changed once after the 3 April 1949 earthquake, simplifying some of the questions. The ROB questionnaire contains specific questions from which the shaking effects on the population and the damage inventory could be summarised. The answers to different survey questions that were sent back from the burgomasters to the ROB, allowed evaluating the intensity in each locality in the EMS-98 macroseismic scale (Grünthal et al., 1998) and establishing a macroseismic map of the earthquakes (see this Atlas). In the Supplement, for each of these 17 earthquakes, an inquiry book is provided that presents an English translation of each ROB questionnaire for each locality. For each locality, the minimum (*I*<sub>min</sub>) and maximum intensity (*I*<sub>max</sub>) is noted on each form. The books are complemented with intensity data derived from letters sent to the ROB, from received telephone calls and intensity values determined from press reports

Gathering intensities per commune through official forms provided convincing results because municipalities in Belgium were small (mean area size of only 19 km<sup>2</sup>) and numerous (2359 communes), and returned documents that most of the time were filled in by wardens who were at that time still in close contact with the population. In 1977, however, a big community fusion took place, in which Belgium changed from 2359 to 596 communities (with mean area size of 82 km<sup>2</sup>).

After this fusion, macroseismic surveys of more recent earthquakes, such as the 14 Septembre 1982 Carnières and, 4 and 9 August 1983 Charleroi earthquakes, hence lost the quality and resolution they once had: on the one hand because these earthquakes were only slightly felt and, on the other hand, because new communities cover a too large area to be represented by only one intensity value

*Example of the ROB official survey. These books are provided in the Supplement for 17 events.*

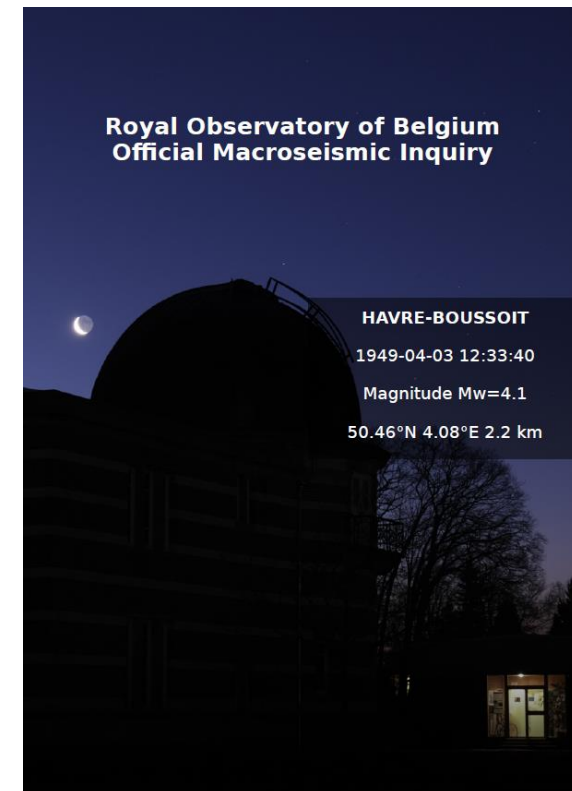

# 3. Sources of information on the Hainaut Earthquakes (records, scientific papers, bulletins, macroseismic inquiries and press papers)

## 3. Press reports

At the end of the 19<sup>th</sup> century and beginning of the 20<sup>th</sup> century, local and regional press reports were a very important source of earthquake information and provided a wide news coverage, even for relatively weak events. Press reports from that time are hence very beneficial documents for seismologists to summarise an earthquake's impact (Alexandre et al., 2007; Camelbeeck et al., 2021). Although past scientific studies on individual earthquakes already included this information, press reports remain a unique source to build the intensity dataset for many events, including the damaging 3 June 1911 earthquake and foreshocks and aftershocks associated with the largest earthquakes. Therefore we did specific research in newspapers covering the Hainaut coal area for all the damaging earthquakes reported in the catalogue. As only a few copies of newspapers have been kept in the ROB seismological archives, we consulted the collections of the record-office of La Louvière and the scanned press archives of the State Archives of Belgium State Archives of Belgium (2021) to extend our information about the earthquake activity in Hainaut.

The list of consulted newspapers is presented in the following pages of this Atlas. Newspaper images shown are free of copyright according to <https://www.kbr.be/en/digitisation/digital-collections-what-about-copyrights/>

### La région de Charleroi a été secouée par un tremblement de terre pendant la nuit de mercredi à jeudi.

La région de Charleroi bouge.  
Dans toutes les communes situées au nord et à l'est de Charleroi, comme à Charleroi même d'ailleurs, les habitants ont ressenti, dans la nuit de jeudi à vendredi, une violente secousse qui, partout, a causé une forte panique.  
Dans le fond des charbonnages, les ouvriers ont cru un moment à un accident.  
Dans plusieurs maisons, les lits ont été fortement secoués et les portes, ébranlées avec vigueur, ont fait croire à une invasion de cambrioleurs.  
A Marcinelle, Gilly, Gosselies, Heppignies, Viesvilles, Montignies, Châtelet, etc., les habitants se sauvèrent à la rue, dès la première secousse. Quelques minutes après, une nouvelle secousse se faisait sentir, plus faible que la première, mais accompagnée d'un grondement violent.  
Enfin, vers minuit, on a perçu un troisième mouvement, extrêmement faible d'ailleurs.  
C'est à Ransart que les dégâts sont les plus importants; une cinquantaine de cheminées ont été renversées; plusieurs toitures sont endommagées et de nombreuses maisons lézardées. Un train qui stationnait a été enlevé des rails.  
Les régions du sud et de l'ouest n'ont absolument rien senti.  
Inutile de dire que ce phénomène a causé une émotion profonde et fait l'objet de toutes les conversations.

*Le Journal de Bruxelles - 3 June 1911 – on the 1 June 1911 earthquake (id 465). Scan from the State Archives of Belgium.*

### Un nouveau tremblement de terre

Maisons lézardées. — Cheminées renversées. — Panique

Décidément est-ce que nous serions à la veille de perdre la tranquillité que nous étions accoutumés de trouver sur notre sol? C'est à le croire.  
Un nouveau tremblement de terre s'est produit hier après-midi, à 2 heures 40, et la secousse, unique, a été extraordinairement violente.  
A Charleroi, plusieurs personnes ont perçu le mouvement sismique qui a provoqué par ailleurs de grands dégâts.  
A Ransart, chaussée de Gilly, la maison Lemaitre a été toute lézardée. Une bonne partie de la toiture a été démolie.  
La maison voisine a eu également à souffrir de la secousse. Une quinzaine de cheminées ont été renversées.  
L'une d'elles a failli écraser un ouvrier ardoisier qui travaillait à la réfection d'un toit.  
A Gosselies, il n'y a presque plus une cheminée debout. Les rues sont jonchées de débris, et on doit se féliciter de ce qu'aucun passant n'ait été blessé.  
Quantité de maisons sont lézardées. Les vitres brisées ne se comptent plus. Les dégâts produits par le tremblement de terre se constatent principalement du côté du quartier de la gare.  
Une véritable panique s'est emparée des habitants en présence du phénomène.  
Les enfants des écoles furent licenciés.  
A Montigny-sur-Sambre, à 2 h. 20, la secousse s'est également fait sentir d'une façon très nette. Des meubles, des cadres ont été déplacés.  
A l'Observatoire d'Uccle, les appareils sismographiques se sont très bien comportés et ils ont enregistré ces deux tremblements de terre, mais nos populations doivent se rassurer. Dans notre pays la croûte terrestre n'est pas disposée au déchirement des régions volcaniques.  
Ces tremblements de terre doivent être considérés comme des faits de minime importance.

*La Gazette de Charleroi – 4 June 1911 – on the 3 June 1911 earthquake (id 466). Scan from the State Archives of Belgium.*

### 3. Sources of macroseismic information on the Hainaut Earthquakes (records, scientific papers, bulletins, macroseismic inquiries and press papers)

#### 4. Other sources of information

Additional information comes from letters of individuals or small reports addressed by the collieries companies to the ROB at the time of the mining exploitation (Somville, 1936). The ROB also organised field missions after some earthquakes, providing reports of the observations. This was the case for the 3 April 1949 (Charlier, 1951) and 10 July 1954 events.

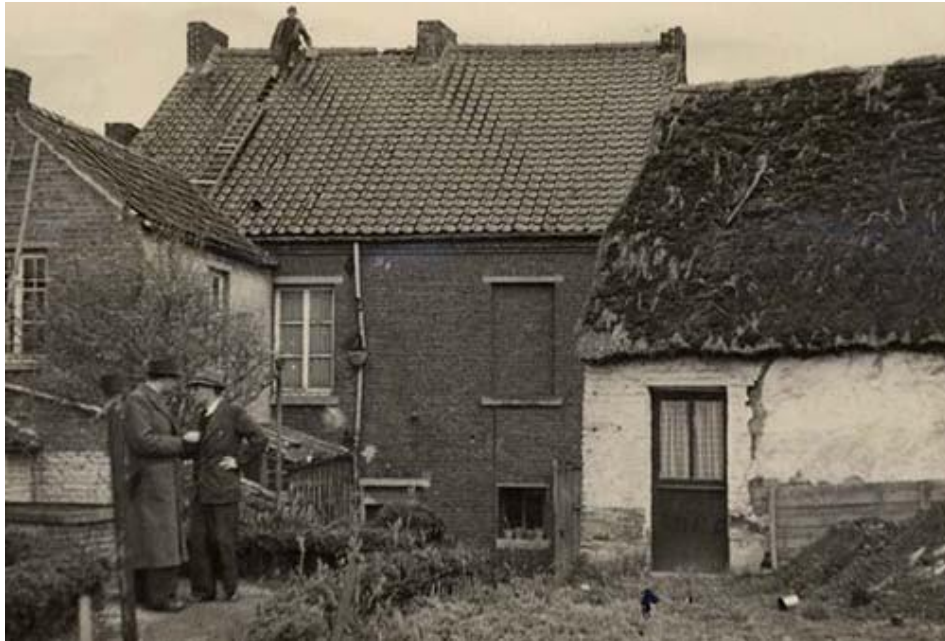

*Field picture taken by ROB researchers when visiting 3 April 1949 epicentral area. Photo is a property of the Royal Observatory of Belgium.*

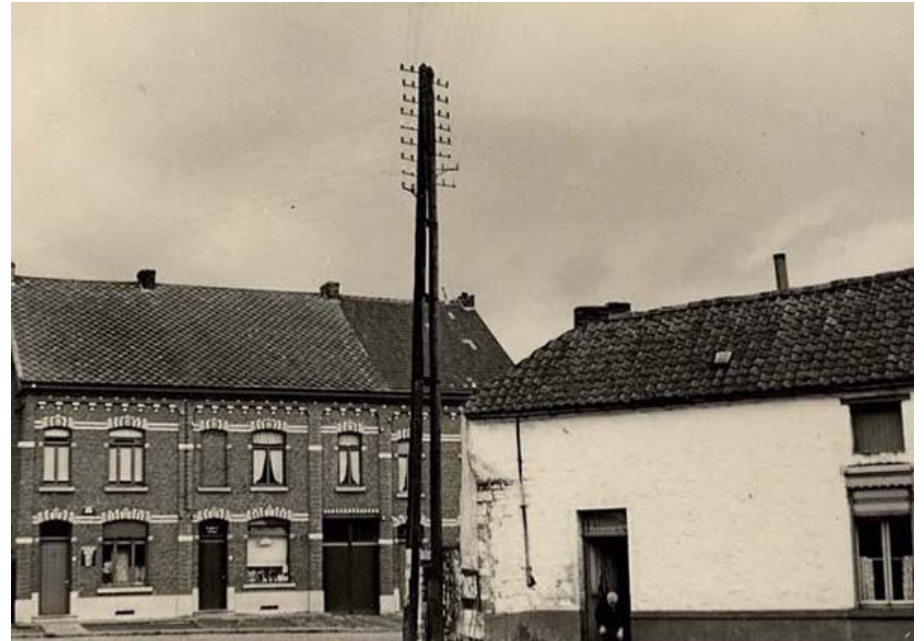

*Field picture taken by ROB researchers when visiting 3 April 1949 epicentral area. Photo is a property of the Royal Observatory of Belgium.*

# 4. Sources on the Hainaut Earthquakes

(records, scientific papers, bulletins, macroseismic inquiries and press papers)

| ID_EARTH | DATE       | TIME     | REGION             | SOURCE                                                                                                                                                                                                                                                                                                                                                                                                                                                                                                                                                                                 |
|----------|------------|----------|--------------------|----------------------------------------------------------------------------------------------------------------------------------------------------------------------------------------------------------------------------------------------------------------------------------------------------------------------------------------------------------------------------------------------------------------------------------------------------------------------------------------------------------------------------------------------------------------------------------------|
| 430      | 1887-02-15 | 00:--:-- | HAVRE              | de Munck, E. (1887). Les tremblements de terre de Havré. <i>Bull. de la Soc. belge de géol., de pal. et d'hydrol.</i> , t. 1, 1887, 177-184.                                                                                                                                                                                                                                                                                                                                                                                                                                           |
| 431      | 1887-09-20 | 06:40:-- | HAVRE              | de Munck, E. (1887). Les tremblements de terre de Havré. <i>Bull. de la Soc. belge de géol., de pal. et d'hydrol.</i> , t. 1, 1887, 177-184.                                                                                                                                                                                                                                                                                                                                                                                                                                           |
| 432      | 1887-09-30 | 09:35:-- | HAVRE              | de Munck, E. (1887). Les tremblements de terre de Havré. <i>Bull. de la Soc. belge de géol., de pal. et d'hydrol.</i> , t. 1, 1887, 177-184.                                                                                                                                                                                                                                                                                                                                                                                                                                           |
| 433      | 1887-10-13 | 21:--:-- | HAVRE              | de Munck, E. (1887). Les tremblements de terre de Havré. <i>Bull. de la Soc. belge de géol., de pal. et d'hydrol.</i> , t. 1, 1887, 177-184.                                                                                                                                                                                                                                                                                                                                                                                                                                           |
| 434      | 1887-10-29 | 21:--:-- | HAVRE              | de Munck, E. (1887). Les tremblements de terre de Havré. <i>Bull. de la Soc. belge de géol., de pal. et d'hydrol.</i> , t. 1, 1887, 177-184.                                                                                                                                                                                                                                                                                                                                                                                                                                           |
| 12875    | 1887-11-19 | 23:40:-- | HAVRE              | de Munck, E. (1887). Les tremblements de terre de Havré. <i>Bull. de la Soc. belge de géol., de pal. et d'hydrol.</i> , t. 1, 1887, 177-184.                                                                                                                                                                                                                                                                                                                                                                                                                                           |
| 12880    | 1887-11-27 | 08:30:-- | HAVRE              | de Munck, E. (1887). Les tremblements de terre de Havré. <i>Bull. de la Soc. belge de géol., de pal. et d'hydrol.</i> , t. 1, 1887, 177-184.                                                                                                                                                                                                                                                                                                                                                                                                                                           |
| 436      | 1895-04-16 | --:--:-- | OBOURG             | de Munck (1995). Lettres adressée à la Soc. belge de géol., de pal. et d'hydrol., publiée dans le <i>Bull. de la Société</i> , t. 1, 1885, 63-66.<br>Le Patriote: 1895/04/18                                                                                                                                                                                                                                                                                                                                                                                                           |
| 438      | 1904-04-23 | 16:30:-- | FLEURUS            | Ciel et Terre, 25, 1 mars 1904-16 février 1905, p. 115.<br>Le Patriote: 1904/04/25<br>La Métropole: 1904/04/25                                                                                                                                                                                                                                                                                                                                                                                                                                                                         |
| 3534     | 1904-05-14 | 05:--:-- | FLEURUS            | Ciel et Terre, 25, 1 mars 1904-16 février 1905, p. 165.<br>Le Patriote: 19/05/1904/05/19<br>Gazette de Charleroi: 1904/05/15<br>Journal de Charleroi: 1904/05/15                                                                                                                                                                                                                                                                                                                                                                                                                       |
| 3535     | 1904-05-31 | 09:--:-- | FLEURUS            | Ciel et Terre, 25, 1 mars 1904-16 février 1905, p. 165.                                                                                                                                                                                                                                                                                                                                                                                                                                                                                                                                |
| 447      | 1911-03-29 | 00:05:43 | RANSART            | Uccle station seismic bulletin<br>Cambier, R. (1911). Les tremblements de terre de Ransart (Mars, Juin, Juillet 1911). <i>Annales de la Société géologique de Belgique</i> , 39, B98-B104.<br>Le Petit Bleu du Matin: 1911/04/01<br>Le Peuple: 1911/04/01<br>Journal de Charleroi: 1911/03/31<br>Journal de Bruxelles: 1911/03/31                                                                                                                                                                                                                                                      |
|          | 1911-04-01 | 02:21:08 | RANSART (DOUBTFUL) | Uccle station seismic bulletin [The event appears as stronger as the previous one, but is not mentioned by any newspaper]                                                                                                                                                                                                                                                                                                                                                                                                                                                              |
| 449      | 1911-04-12 | 16:15:-- | CUESMES            | Cornet, J. (1911). Le tremblement de terre de Mons (12 avril 1911). <i>Annales de la Société géologique de Belgique</i> , 39, B89-B97.<br>Le Peuple: 1911/04/14 and 1904/04/15<br>Le Petit Bleu du Matin: 1911/04/14<br>Gazette de Charleroi: 1911/04/13                                                                                                                                                                                                                                                                                                                               |
| 465      | 1911-06-01 | 22:51:58 | RANSART            | Uccle station seismic bulletin<br>Cambier, R. (1911). Les tremblements de terre de Ransart (Mars, Juin, Juillet 1911). <i>Annales de la Société géologique de Belgique</i> , 39, B98-B104.<br>Somville, O. (1936). Les tremblements de terre en Belgique. Edt Imprimerie Duculot (Gembloux). <i>Observatoire Royal de Belgique</i> , 24 pages.<br>La Meuse: 1911/06/03<br>Journal de Charleroi: 1911/06/01 and 1911/06/03<br>La Dernière Heure: 1911/06/03<br>Le Peuple: 1911/06/03<br>Journal de Bruxelles: 1911/06/03<br>Courrier de l'Escaut: 1911/06/04<br>Le Patriote: 1911/06/03 |
| 466      | 1911-06-03 | 14:35:54 | GOSSELIES          | Uccle station seismic bulletin<br>Cambier, R. (1911). Les tremblements de terre de Ransart (Mars, Juin, Juillet 1911). <i>Annales de la Société géologique de Belgique</i> , 39, B98-B104.<br>Journal de Charleroi: 1911/06/04 and 1911/06/07<br>Gazette de Charleroi: 1911/06/04<br>La Dernière Heure: 1911/06/04<br>Journal de Bruxelles: 1911/06/05                                                                                                                                                                                                                                 |

# 4. Sources on the Hainaut Earthquakes (records, scientific papers, bulletins, macroseismic inquiries and press papers)

| ID_EARTH | DATE       | TIME        | REGION                  | SOURCE                                                                                                                                                                                                                                                                                                                                                                                                                                                                                                                                             |
|----------|------------|-------------|-------------------------|----------------------------------------------------------------------------------------------------------------------------------------------------------------------------------------------------------------------------------------------------------------------------------------------------------------------------------------------------------------------------------------------------------------------------------------------------------------------------------------------------------------------------------------------------|
| 12885    | 1911-06-06 | 03:25:--.-- | RANSART                 | Le Patriote: 1911/06/18<br>La Meuse: 1911/06/16<br>Courrier de l'Escaut: 1911/06/17                                                                                                                                                                                                                                                                                                                                                                                                                                                                |
| 467      | 1911-06-19 | 20:49:--.-- | RANSART                 | Cambier, R. (1911). Les tremblements de terre de Ransart (Mars, Juin, Juillet 1911). <i>Annales de la Société géologique de Belgique</i> , 39, B98-B104.<br>Gazette de Charleroi: 20/06/1911                                                                                                                                                                                                                                                                                                                                                       |
| 468      | 1911-07-14 | 04:--:--.-- | GOSSELIES               | Cambier, R. (1911). Les tremblements de terre de Ransart (Mars, Juin, Juillet 1911). <i>Annales de la Société géologique de Belgique</i> , 39, B98-B104.                                                                                                                                                                                                                                                                                                                                                                                           |
| 469      | 1911-07-23 | 05:--:--.-- | RANSART                 | Cambier, R. (1911). Les tremblements de terre de Ransart (Mars, Juin, Juillet 1911). <i>Annales de la Société géologique de Belgique</i> , 39, B98-B104.                                                                                                                                                                                                                                                                                                                                                                                           |
| 476      | 1920-01-17 | 03:11:04.-- | HORNU                   | UCC seismic bulletin<br>Capiou, H. (1920). Secousse sismique ressentie le 15 janvier dans le Borinage. <i>Annales de la Société géologique de Belgique</i> , 43, B173-B174.<br>Somville, O. (1936). Les tremblements de terre en Belgique. Edt Imprimerie Duculot (Gembloux). <i>Observatoire Royal de Belgique</i> , 24 pages.<br>La Dernière Heure: 1920/01/18<br>Le Courrier de l'Escaut: 1920/01/18<br>Le Peuple: 1920/01/18                                                                                                                   |
| 488      | 1931-05-09 | 12:25:56.-- | HOUDENG-AIMERIES        | UCC seismic bulletin<br>Somville, O. (1936). Les tremblements de terre en Belgique. Edt Imprimerie Duculot (Gembloux). <i>Observatoire Royal de Belgique</i> , 24 pages.<br>Gazette de Charleroi: 1931/05/10<br>La Libre Belgique: 1931/05/11                                                                                                                                                                                                                                                                                                      |
| 489      | 1931-05-28 | 15:20:--.-- | CHAPELLE-LEZ-HERLAIMONT | Somville, O. (1936). Les tremblements de terre en Belgique. Edt Imprimerie Duculot (Gembloux). <i>Observatoire Royal de Belgique</i> , 24 pages.                                                                                                                                                                                                                                                                                                                                                                                                   |
| 491      | 1931-07-14 | 20:45:--.-- | JUMET                   | Somville, O. (1936). Les tremblements de terre en Belgique. Edt Imprimerie Duculot (Gembloux). <i>Observatoire Royal de Belgique</i> , 24 pages.                                                                                                                                                                                                                                                                                                                                                                                                   |
| 496      | 1933-02-11 | 21:25:--.-- | MONS                    | Somville, O. (1936). Les tremblements de terre en Belgique. Edt Imprimerie Duculot (Gembloux). <i>Observatoire Royal de Belgique</i> , 24 pages.                                                                                                                                                                                                                                                                                                                                                                                                   |
| 497      | 1933-03-04 | 22:--:--.-- | MONS                    | Somville, O. (1936). Les tremblements de terre en Belgique. Edt Imprimerie Duculot (Gembloux). <i>Observatoire Royal de Belgique</i> , 24 pages.<br>Gazette de Charleroi: 1933/03/06<br>La Meuse: 1933/03/06<br>Vers L'Avenir: 1933/03/08                                                                                                                                                                                                                                                                                                          |
| 498      | 1933-03-05 | 05:28:10.-- | MONS                    | UCC seismic bulletin<br>Somville, O. (1936). Les tremblements de terre en Belgique. Edt Imprimerie Duculot (Gembloux). <i>Observatoire Royal de Belgique</i> , 24 pages.<br>Gazette de Charleroi: 1933/03/06<br>La Meuse: 1933/03/06<br>Vers L'Avenir: 1933/03/08                                                                                                                                                                                                                                                                                  |
| 501      | 1934-11-12 | 13:--:--.-- | CUESMES                 | Somville, O. (1936). Les tremblements de terre en Belgique. Edt Imprimerie Duculot (Gembloux). <i>Observatoire Royal de Belgique</i> , 24 pages.                                                                                                                                                                                                                                                                                                                                                                                                   |
| 503      | 1935-01-14 | 23:44:--.-- | ELOUGES                 | Somville, O. (1936). Les tremblements de terre en Belgique. Edt Imprimerie Duculot (Gembloux). <i>Observatoire Royal de Belgique</i> , 24 pages.                                                                                                                                                                                                                                                                                                                                                                                                   |
| 505      | 1936-11-05 | 00:41:44.-- | GOUY-LEZ-PIETON         | UCC seismic bulletin<br>Somville, O. (1936). Les tremblements de terre en Belgique. Edt Imprimerie Duculot (Gembloux). <i>Observatoire Royal de Belgique</i> , 24 pages.<br>Le Peuple: 1936/11/07<br>Le Soir: 1936/11/10<br>L'Indépendance Belge: 1936/11/07<br>Charlier, Ch. (1951). Etude systématique des tremblements de terre belges récents (1900-1950) – IV <sup>e</sup> partie. « La sismicité de la Belgique ». <i>Publications du Service Séismologique et Gravimétrique de l'Observatoire Royale de Belgique, Série S, n°10, pp 60.</i> |
| 517      | 1940-01-07 | 16:28:52.-- | LA LOUVIERE             | UCC seismic bulletin<br>La Cité Nouvelle: 1940/01/08<br>La Gazette de Charleroi: 1940/01/09<br>La Dernière Heure: 1940/01/08<br>Le Bien Public: 1940/01/08<br>Le Courrier de l'Escaut: 1940/01/08                                                                                                                                                                                                                                                                                                                                                  |

# 4. Sources on the Hainaut Earthquakes

(records, scientific papers, bulletins, macroseismic inquiries and press papers)

| ID_EARTH | DATE       | TIME        | REGION         | SOURCE                                                                                                                                                                                                                                                                                                                                                                                                                                                                                                                                                                             |
|----------|------------|-------------|----------------|------------------------------------------------------------------------------------------------------------------------------------------------------------------------------------------------------------------------------------------------------------------------------------------------------------------------------------------------------------------------------------------------------------------------------------------------------------------------------------------------------------------------------------------------------------------------------------|
| 518      | 1940-01-07 | 20:32:44.-- | LA LOUVIERE    | UCC seismic bulletin<br>La Cité Nouvelle: 1940/01/08<br>La Gazette de Charleroi: 1940/01/09<br>La Dernière Heure: 1940/01/08                                                                                                                                                                                                                                                                                                                                                                                                                                                       |
| 519      | 1940-01-09 | 03:42:07.-- | LA LOUVIERE    | UCC seismic bulletin<br>La Dernière Heure: 1940/01/10<br>La Libre Belgique: 1940/01/10<br>Le XXème Siècle: 1940/01/10                                                                                                                                                                                                                                                                                                                                                                                                                                                              |
| 522      | 1944-03-11 | 20:53:14.-- | CUESMES        | UCC seismic bulletin                                                                                                                                                                                                                                                                                                                                                                                                                                                                                                                                                               |
| 523      | 1944-03-12 | 00:45:50.-- | CUESMES        | Charlier, Ch. (1944). Secousses séismiques ressenties en Belgique (Hainaut) en mars 1944. <i>Ciel et Terre</i> , 60, n° 4-5-6, p 1053.                                                                                                                                                                                                                                                                                                                                                                                                                                             |
| 524      | 1944-03-13 | 14:23:13.-- | CUESMES        | UCC seismic bulletin<br>Charlier, Ch. (1944). Secousses séismiques ressenties en Belgique (Hainaut) en mars 1944. <i>Ciel et Terre</i> , 60, n° 4-5-6, p 1053.                                                                                                                                                                                                                                                                                                                                                                                                                     |
| 525      | 1944-03-14 | 03:19:22.-- | CUESMES        | UCC seismic bulletin<br>Charlier, Ch. (1944). Secousses séismiques ressenties en Belgique (Hainaut) en mars 1944. <i>Ciel et Terre</i> , 60, n° 4-5-6, p 1053.                                                                                                                                                                                                                                                                                                                                                                                                                     |
| 526      | 1944-03-15 | 10:19:10.-- | CUESMES        | UCC seismic bulletin<br>Charlier, Ch. (1944). Secousses séismiques ressenties en Belgique (Hainaut) en mars 1944. <i>Ciel et Terre</i> , 60, n° 4-5-6, p 1053.                                                                                                                                                                                                                                                                                                                                                                                                                     |
| 527      | 1944-03-19 | 01:56:15.-- | CUESMES        | UCC seismic bulletin<br>Charlier, Ch. (1944). Secousses séismiques ressenties en Belgique (Hainaut) en mars 1944 (suite). <i>Ciel et Terre</i> , 60, n° 7-8-9, p 1053-11850.                                                                                                                                                                                                                                                                                                                                                                                                       |
| 528      | 1944-03-23 | 16:21:03.-- | CUESMES        | UCC seismic bulletin<br>Charlier, Ch. (1944). Secousses séismiques ressenties en Belgique (Hainaut) en mars 1944 (suite). <i>Ciel et Terre</i> , 60, n° 7-8-9, p 1053-11850.                                                                                                                                                                                                                                                                                                                                                                                                       |
| 529      | 1944-03-29 | 01:00:41.-- | CUESMES        | UCC seismic bulletin<br>Charlier, Ch. (1944). Secousses séismiques ressenties en Belgique (Hainaut) en mars 1944 (suite). <i>Ciel et Terre</i> , 60, n° 7-8-9, p 1053-11850.                                                                                                                                                                                                                                                                                                                                                                                                       |
| 530      | 1946-03-09 | 19:38:01.-- | HAVRE          | UCC seismic bulletin                                                                                                                                                                                                                                                                                                                                                                                                                                                                                                                                                               |
| 531      | 1948-12-25 | 12:06:20.-- | HAVRE          | recorded at the Uccle seismic station<br>La Nation Belge: 1948/12/29<br>La Dernière Heure: 1948/12/29<br>Le Soir: 1948/12/29                                                                                                                                                                                                                                                                                                                                                                                                                                                       |
| 532      | 1948-12-27 | 16:30:--.-- | HAVRE          | Le Soir: 1948/12/29                                                                                                                                                                                                                                                                                                                                                                                                                                                                                                                                                                |
| 533      | 1949-04-03 | 12:27:38.-- | HAVRE          | recorded at the Uccle seismic station<br>L'Indépendance: 1949/04/04<br>La Libre Belgique: 1949/04/04<br>Le Rappel: 1949/04/03<br>La Nouvelle Gazette (Edition du Centre): 1949/04/04<br>Le Soir: 1949/04/05<br>Le Peuple: 1949/04/05                                                                                                                                                                                                                                                                                                                                               |
| 534      | 1949-04-03 | 12:33:40.-- | HAVRE-BOUSSOIT | recorded at the Uccle seismic station<br>Official macroseismic survey of the Royal Observatory of Belgium<br>Report of the field inquiry done by the ROB (unpublished document of 1949)<br>Charlier, C. (1949). Les séismes de la vallée de la Haine. Publication provisoire, série S, <i>Observatoire Royal de Belgique</i> , pp 39.<br>Marlière, R. (1951). Les tremblements de terre d'avril-mai 1949 dans la région de Mons. <i>Bull. de la Soc. belge de Géol., de Pal. et d'Hydrol.</i> , 60, 17-27.<br>L'Indépendance: 1949/04/04-05-06<br>La Libre Belgique: 1949/04/04-05 |

# 4. Sources on the Hainaut Earthquakes

(records, scientific papers, bulletins, macroseismic inquiries and press papers)

| ID_EARTH | DATE       | TIME        | REGION         | SOURCE                                                                                                                                                            |
|----------|------------|-------------|----------------|-------------------------------------------------------------------------------------------------------------------------------------------------------------------|
| 535      | 1949-04-03 | 12:53:02.-- | HAVRE          | Le Rappel: 1949/04/03                                                                                                                                             |
|          |            |             |                | La Dernière Heure: 1949/04/04                                                                                                                                     |
|          |            |             |                | La Nouvelle Gazette (Edition du Centre): 1949/04/04                                                                                                               |
|          |            |             |                | Le Soir: 1949/04/05                                                                                                                                               |
|          |            |             |                | Le Peuple: 1949/04/05                                                                                                                                             |
| 536      | 1949-04-03 | 13:05:18.-- | HAVRE          | recorded at the Uccle seismic station                                                                                                                             |
|          |            |             |                | L'Indépendance: 1949/04/04                                                                                                                                        |
|          |            |             |                | La Libre Belgique: 1949/04/04                                                                                                                                     |
|          |            |             |                | Le Rappel: 1949/04/03                                                                                                                                             |
|          |            |             |                | La Nouvelle Gazette (Edition du Centre): 1949/04/04                                                                                                               |
| 12890    | 1949-04-03 | 21:30:--.-- | HAVRE          | Le Peuple: 1949/04/05                                                                                                                                             |
| 12915    | 1949-04-03 | 22:30:--.-- | HAVRE          | recorded at the Uccle seismic station                                                                                                                             |
| 12920    | 1949-04-04 | 03:40:--.-- | HAVRE          | La Libre Belgique: 1949/04/04                                                                                                                                     |
| 12925    | 1949-04-06 | 04:--:--.-- | HAVRE          | Le Rappel: 1949/04/03                                                                                                                                             |
| 537      | 1949-04-09 | 21:48:--.-- | HAVRE          | La Nouvelle Gazette (Edition du Centre): 1949/04/04                                                                                                               |
|          |            |             |                | L'Indépendance: 1949/04/05                                                                                                                                        |
|          |            |             |                | L'Indépendance: 1949/04/05                                                                                                                                        |
|          |            |             |                | L'Indépendance: 1949/04/05                                                                                                                                        |
|          |            |             |                | L'Avenir du Luxembourg: 1949/04/08                                                                                                                                |
| 538      | 1949-04-14 | 01:09:14.-- | HAVRE-BOUSSOIT | Vers L'Avenir: 1949/04/08                                                                                                                                         |
|          |            |             |                | Marlière, R. (1951). Les tremblements de terre d'avril-mai 1949 dans la région de Mons. <i>Bull. de la Soc. belge de Géol., de Pal. et d'Hydrol.</i> , 60, 17-27. |
|          |            |             |                | Journal de Charleroi: 1949/04/15                                                                                                                                  |
|          |            |             |                | Le Soir: 1949/04/27                                                                                                                                               |
|          |            |             |                | recorded at the Uccle seismic station                                                                                                                             |
| 539      | 1949-04-14 | 05:12:21.-- | HAVRE          | Marlière, R. (1951). Les tremblements de terre d'avril-mai 1949 dans la région de Mons. <i>Bull. de la Soc. belge de Géol., de Pal. et d'Hydrol.</i> , 60, 17-27. |
|          |            |             |                | Le Courrier de l'Escaut: 1949/04/16                                                                                                                               |
|          |            |             |                | La Dernière Heure: 1949/04/16                                                                                                                                     |
|          |            |             |                | La Libre Belgique: 1949/04/15                                                                                                                                     |
|          |            |             |                | Journal de Charleroi: 1949/04/15                                                                                                                                  |
| 12910    | 1949-04-14 | 05:40:--.-- | HAVRE          | L'Indépendance: 1949/04/15                                                                                                                                        |
| 12915    | 1949-04-14 | 13:50:--.-- | HAVRE          | recorded at the Uccle seismic station                                                                                                                             |
| 12920    | 1949-04-14 | 15:53:--.-- | HAVRE          | Marlière, R. (1951). Les tremblements de terre d'avril-mai 1949 dans la région de Mons. <i>Bull. de la Soc. belge de Géol., de Pal. et d'Hydrol.</i> , 60, 17-27. |
| 12925    | 1949-04-14 | 16:15:--.-- | HAVRE          | L'Indépendance: 1949/04/15                                                                                                                                        |
|          |            |             |                | La Dernière Heure: 1949/04/16                                                                                                                                     |

# 4. Sources on the Hainaut Earthquakes

(records, scientific papers, bulletins, macroseismic inquiries and press papers)

| ID_EARTH | DATE       | TIME        | REGION      | SOURCE                                                                                                                                                                                                                            |
|----------|------------|-------------|-------------|-----------------------------------------------------------------------------------------------------------------------------------------------------------------------------------------------------------------------------------|
| 2425     | 1949-05-02 | 16:56:03.-- | HAVRE       | recorded at the Uccle seismic station<br>Marlière, R. (1951). Les tremblements de terre d'avril-mai 1949 dans la région de Mons. <i>Bull. de la Soc. belge de Géol., de Pal. et d'Hydrol.</i> , 60, 17-27.<br>Le Soir: 1949/05/04 |
| 541      | 1949-05-25 | 18:59:44.-- | HAVRE       | recorded at the Uccle seismic station<br>L'Indépendance: 1949/05/26                                                                                                                                                               |
| 546      | 1952-04-09 | 21:35:--.-- | LA LOUVIERE | Le Soir: 1952/04/11                                                                                                                                                                                                               |
| 547      | 1952-10-21 | 21:15:--.-- | QUAREGNON   | Official macroseismic survey of the Royal Observatory of Belgium<br>Le Drapeau Rouge: 1952/10/23<br>Le Soir: 1952/10/24<br>Le Rappel: 1952/10/23                                                                                  |
| 548      | 1952-10-22 | 07:--:--.-- | FRAMERIES   | Official macroseismic survey of the Royal Observatory of Belgium<br>Le Drapeau Rouge: 1952/10/23<br>Le Soir: 1952/10/24<br>Le Rappel: 1952/10/23                                                                                  |
| 549      | 1952-10-27 | 06:11:--.-- | QUAREGNON   | Official macroseismic survey of the Royal Observatory of Belgium<br>Le Drapeau Rouge: 1952/10/28<br>Le Soir: 1952/10/28<br>Le Rappel: 1952/10/28                                                                                  |
| 12930    | 1953-05-21 | 02:--:--.-- | BOUSSOIT    | Letter of the town secretary to the Royal Observatory of Belgium (16 June 1953)                                                                                                                                                   |
| 553      | 1953-06-11 | 00:22:21.-- | BOUSSOIT    | UCC seismic bulletin<br>Letter of the town secretary to the Royal Observatory of Belgium (16 June 1953)                                                                                                                           |
| 12935    | 1953-06-14 | 01:25:--.-- | BOUSSOIT    | Letter of the town secretary to the Royal Observatory of Belgium (16 June 1953)                                                                                                                                                   |
| 557      | 1953-09-15 | 23:55:--.-- | QUAREGNON   | Official macroseismic survey of the Royal Observatory of Belgium [only the locality of Quaregnon]                                                                                                                                 |
| 561      | 1954-04-05 | 20:26:43.-- | QUAREGNON   | UCC seismic bulletin<br>Belgian report to International Union of Geodesy and Geophysics [period 1954-1956]                                                                                                                        |
| 562      | 1954-07-10 | 17:18:21.-- | FLENU       | UCC seismic bulletin<br>Belgian report to International Union of Geodesy and Geophysics [period 1954-1956]<br>Official macroseismic survey of the Royal Observatory of Belgium<br>Le Soir: 1954/07/12                             |
| 12940    | 1954-07-11 | 04:--:--.-- | QUAREGNON   | Le Soir: 1954/07/12                                                                                                                                                                                                               |
| 563      | 1955-02-14 | 02:10:--.-- | BOUSSU      | Belgian report to International Union of Geodesy and Geophysics [period 1954-1956]<br>Official macroseismic survey of the Royal Observatory of Belgium [Only the locality of Boussu]                                              |
| 564      | 1955-05-12 | 20:--:--.-- | BOUSSU      | Belgian report to International Union of Geodesy and Geophysics [period 1954-1956]<br>Official macroseismic survey of the Royal Observatory of Belgium [Only the locality of Boussu]                                              |
| 565      | 1955-05-17 | 18:--:--.-- | BOUSSU      | Belgian report to International Union of Geodesy and Geophysics [period 1954-1956]<br>Official macroseismic survey of the Royal Observatory of Belgium [Only the locality of Boussu]                                              |
| 566      | 1955-05-18 | 04:50:--.-- | BOUSSU      | Belgian report to International Union of Geodesy and Geophysics [period 1954-1956]<br>Official macroseismic survey of the Royal Observatory of Belgium [Only the locality of Boussu]                                              |
| 570      | 1956-06-24 | 04:20:--.-- | BOUSSU      | Letter of a correspondent living in Boussu (3 July 1956)<br>Belgian report to International Union of Geodesy and Geophysics [period 1954-1956]                                                                                    |
| 12945    | 1956-06-25 | 02:15:--.-- | BOUSSU      | Letter of a correspondent living in Boussu (3 July 1956)<br>Belgian report to International Union of Geodesy and Geophysics [period 1954-1956]                                                                                    |

# 4. Sources on the Hainaut Earthquakes

(records, scientific papers, bulletins, macroseismic inquiries and press papers)

| ID_EARTH | DATE       | TIME       | REGION                | SOURCE                                                                                                                                                                                                                                                                                                                                                                                                                                                                                                                                                                                                         |
|----------|------------|------------|-----------------------|----------------------------------------------------------------------------------------------------------------------------------------------------------------------------------------------------------------------------------------------------------------------------------------------------------------------------------------------------------------------------------------------------------------------------------------------------------------------------------------------------------------------------------------------------------------------------------------------------------------|
| 571      | 1956-07-01 | 21:55:--   | BOUSSU                | Letter of a correspondent living in Boussu (3 July 1956)                                                                                                                                                                                                                                                                                                                                                                                                                                                                                                                                                       |
| 573      | 1957-01-08 | 16:12:--   | BOUSSU                | Belgian report to International Union of Geodesy and Geophysics [period 1957-1960]                                                                                                                                                                                                                                                                                                                                                                                                                                                                                                                             |
| 574      | 1957-01-21 | 11:00:--   | MONTIGNIES LE TILLEUL | Belgian report to International Union of Geodesy and Geophysics [period 1957-1960]                                                                                                                                                                                                                                                                                                                                                                                                                                                                                                                             |
| 576      | 1957-11-21 | 15:17:--   | LA LOUVIERE           | Belgian report to International Union of Geodesy and Geophysics [period 1957-1960]<br>Le Soir: 1957/11/22                                                                                                                                                                                                                                                                                                                                                                                                                                                                                                      |
| 13045    | 1957-11-21 | 15:41:--   | LA LOUVIERE           | Le Soir: 1957/11/22                                                                                                                                                                                                                                                                                                                                                                                                                                                                                                                                                                                            |
| 577      | 1958-05-30 | 14:45:--   | HAVRE                 | Belgian report to International Union of Geodesy and Geophysics [period 1954-1956]                                                                                                                                                                                                                                                                                                                                                                                                                                                                                                                             |
| 582      | 1965-12-15 | 12:07:14.9 | STREPY-BRACQUEGNIES   | seismic bulletin of UCC, DOU and WRM<br>Official macroseismic survey of the Royal Observatory of Belgium<br>Van Gils, J.-M. (1966). Les séismes des 15 et 21 décembre 1965 et du 16 janvier 1966. <i>Ciel et Terre</i> , 82, 243-267.<br>Ahorner, L. (1972). Erdbebenchronik für die Rheinlande 1964-70. Decheniana, 125, Heft ½, 259-283.<br>L'Indépendance (Edition du Centre): 1965/12/16<br>La Dernière Heure: 1965/12/16<br>La Libre Belgique: 1965/12/16<br>La Meuse - La Lanterne: 1965/12/16<br>La Nouvelle Gazette (Edition du Centre): 1965/12/16<br>Le Peuple: 965/12/16-17                         |
| 583      | 1965-12-15 | 13:42:01.5 | STREPY-BRACQUEGNIES   | seismic bulletin of UCC, DOU and WRM<br>Van Gils, J.-M. (1966). Les séismes des 15 et 21 décembre 1965 et du 16 janvier 1966. <i>Ciel et Terre</i> , 82, 243-267.<br>La Nouvelle Gazette (Edition du Centre): 1965/12/16                                                                                                                                                                                                                                                                                                                                                                                       |
| 584      | 1965-12-15 | 14:02:14.1 | STREPY-BRACQUEGNIES   | seismic bulletin of UCC, DOU and WRM<br>Van Gils, J.-M. (1966). Les séismes des 15 et 21 décembre 1965 et du 16 janvier 1966. <i>Ciel et Terre</i> , 82, 243-267.<br>La Meuse - La Lanterne: 1965/12/16<br>La Nouvelle Gazette (Edition du Centre): 1965/12/16<br>Le Peuple: 965/12/16                                                                                                                                                                                                                                                                                                                         |
| 585      | 1965-12-15 | 15:16:36.1 | STREPY-BRACQUEGNIES   | seismic bulletin of UCC, DOU and WRM<br>Van Gils, J.-M. (1966). Les séismes des 15 et 21 décembre 1965 et du 16 janvier 1966. <i>Ciel et Terre</i> , 82, 243-267.<br>La Nouvelle Gazette (Edition du Centre): 1965/12/16                                                                                                                                                                                                                                                                                                                                                                                       |
| 587      | 1966-01-16 | 00:13:18.7 | MORLANWELZ-MARIEMONT  | seismic bulletin of UCC and DOU<br>Official macroseismic survey of the Royal Observatory of Belgium<br>Van Gils, J.-M. (1966). Les séismes des 15 et 21 décembre 1965 et du 16 janvier 1966. <i>Ciel et Terre</i> , 82, 243-267.<br>Ahorner, L. (1972). Erdbebenchronik für die Rheinlande 1964-70. Decheniana, 125, Heft ½, 259-283.<br>La Cité: 1966/01/17<br>La Dernière Heure: 1966/01/17<br>La Libre Belgique: 1966/01/17<br>La Nouvelle Gazette (Edition du Centre):1966/01/17<br>Le Peuple: 1966/01/17<br>L'Indépendance (Edition du Centre):1966/01/17<br>Le Rappel: 1966/01/17<br>Le Soir: 1966/01/17 |

# 4. Sources on the Hainaut Earthquakes

(records, scientific papers, bulletins, macroseismic inquiries and press papers)

| ID_EARTH | DATE       | TIME        | REGION               | SOURCE                                                                                                                                                                                                                                                                                                                                                                                                                                                                                                                                                                                                         |
|----------|------------|-------------|----------------------|----------------------------------------------------------------------------------------------------------------------------------------------------------------------------------------------------------------------------------------------------------------------------------------------------------------------------------------------------------------------------------------------------------------------------------------------------------------------------------------------------------------------------------------------------------------------------------------------------------------|
| 588      | 1966-01-16 | 06:51:34.5  | MORLANWELZ-MARIEMONT | seismic bulletin of UCC and DOU<br>Official macroseismic survey of the Royal Observatory of Belgium<br>Van Gils, J.-M. (1966). Les séismes des 15 et 21 décembre 1965 et du 16 janvier 1966. <i>Ciel et Terre</i> , 82, 243-267.<br>Ahorner, L. (1972). Erdbebenchronik für die Rheinlande 1964-70. Decheniana, 125, Heft ½, 259-283.<br>La Cité: 1966/01/17<br>La Dernière Heure: 1966/01/17<br>La Libre Belgique: 1966/01/17<br>La Nouvelle Gazette (Edition du Centre):1966/01/17<br>Le Peuple: 1966/01/17<br>L'Indépendance (Edition du Centre):1966/01/17<br>Le Rappel: 1966/01/17<br>Le Soir: 1966/01/17 |
| 589      | 1966-01-16 | 12:32:50.3  | MORLANWELZ-MARIEMONT | seismic bulletin of UCC and DOU<br>Official macroseismic survey of the Royal Observatory of Belgium<br>Van Gils, J.-M. (1966). Les séismes des 15 et 21 décembre 1965 et du 16 janvier 1966. <i>Ciel et Terre</i> , 82, 243-267.<br>Ahorner, L. (1972). Erdbebenchronik für die Rheinlande 1964-70. Decheniana, 125, Heft ½, 259-283.<br>La Cité: 1966/01/17<br>La Dernière Heure: 1966/01/17<br>La Libre Belgique: 1966/01/17<br>La Nouvelle Gazette (Edition du Centre):1966/01/17<br>Le Peuple: 1966/01/17<br>L'Indépendance (Edition du Centre):1966/01/17<br>Le Rappel: 1966/01/17<br>Le Soir: 1966/01/17 |
| 13050    | 1966-01-17 | 17:04:21.5  | MORLANWELZ-MARIEMONT | seismic bulletin of UCC and DOU<br>Van Gils, J.-M. (1966). Les séismes des 15 et 21 décembre 1965 et du 16 janvier 1966. <i>Ciel et Terre</i> , 82, 243-267.<br>L'Indépendance: 1966/01/18                                                                                                                                                                                                                                                                                                                                                                                                                     |
| 13055    | 1966-01-17 | 20:28:59.3  | MORLANWELZ-MARIEMONT | seismic bulletin of UCC and DOU<br>Van Gils, J.-M. (1966). Les séismes des 15 et 21 décembre 1965 et du 16 janvier 1966. <i>Ciel et Terre</i> , 82, 243-267.<br>L'Indépendance: 1966/01/18                                                                                                                                                                                                                                                                                                                                                                                                                     |
| 590      | 1966-01-24 | 22:13:20.7  | MORLANWELZ-MARIEMONT | seismic bulletin of UCC and DOU<br>Van Gils, J.-M. (1966). Les séismes des 15 et 21 décembre 1965 et du 16 janvier 1966. <i>Ciel et Terre</i> , 82, 243-267.<br>Ahorner, L. (1972). Erdbebenchronik für die Rheinlande 1964-70. Decheniana, 125, Heft ½, 259-283.                                                                                                                                                                                                                                                                                                                                              |
| 591      | 1966-01-26 | 01:08:44.3  | MORLANWELZ-MARIEMONT | Van Gils, J.-M. (1966). Les séismes des 15 et 21 décembre 1965 et du 16 janvier 1966. <i>Ciel et Terre</i> , 82, 243-267.                                                                                                                                                                                                                                                                                                                                                                                                                                                                                      |
| 13060    | 1966-03-02 | 06:50:48.-- | MORLANWELZ-MARIEMONT | seismic bulletin of UCC and DOU<br>Van Gils, J.-M. (1966). Les séismes des 15 et 21 décembre 1965 et du 16 janvier 1966. <i>Ciel et Terre</i> , 82, 243-267.<br>Ahorner, L. (1972). Erdbebenchronik für die Rheinlande 1964-70. Decheniana, 125, Heft ½, 259-283.                                                                                                                                                                                                                                                                                                                                              |
| 592      | 1966-03-11 | 04:09:30.3  | MORLANWELZ-MARIEMONT | seismic bulletin of UCC, DOU and WRM<br>Van Gils, J.-M. (1966). Les séismes des 15 et 21 décembre 1965 et du 16 janvier 1966. <i>Ciel et Terre</i> , 82, 243-267.                                                                                                                                                                                                                                                                                                                                                                                                                                              |
| 593      | 1966-03-16 | 01:21:30.6  | MORLANWELZ-MARIEMONT | seismic bulletin of UCC, DOU and WRM                                                                                                                                                                                                                                                                                                                                                                                                                                                                                                                                                                           |
| 594      | 1966-03-17 | 18:17:08.3  | MORLANWELZ-MARIEMONT | seismic bulletin of UCC and DOU                                                                                                                                                                                                                                                                                                                                                                                                                                                                                                                                                                                |
| 595      | 1966-03-20 | 00:08:14.7  | TRAZEGNIES           | seismic bulletin of UCC, DOU and WRM                                                                                                                                                                                                                                                                                                                                                                                                                                                                                                                                                                           |
| 596      | 1966-03-22 | 00:20:32.5  | TRAZEGNIES           | seismic bulletin of UCC and DOU                                                                                                                                                                                                                                                                                                                                                                                                                                                                                                                                                                                |

# 4. Sources on the Hainaut Earthquakes

(records, scientific papers, bulletins, macroseismic inquiries and press papers)

| ID_EARTH | DATE       | TIME       | REGION               | SOURCE                                                                                                                                                                                                                                                                                                                                                                                                                                                                                                              |
|----------|------------|------------|----------------------|---------------------------------------------------------------------------------------------------------------------------------------------------------------------------------------------------------------------------------------------------------------------------------------------------------------------------------------------------------------------------------------------------------------------------------------------------------------------------------------------------------------------|
| 597      | 1967-03-28 | 15:49:25.1 | CARNIERES            | seismic bulletin of UCC, DOU, WRM and LUX<br>Official macroseismic survey of the Royal Observatory of Belgium<br>Ahorner, L. (1972). Erdbebenchronik für die Rheinlande 1964-70. Decheniana, 125, Heft ½, 259-283.<br>La Nouvelle Gazette: 1967/03/29                                                                                                                                                                                                                                                               |
| 598      | 1967-04-04 | 11:16:26.2 | CARNIERES            | seismic bulletin of UCC and DOU                                                                                                                                                                                                                                                                                                                                                                                                                                                                                     |
| 599      | 1967-04-04 | 18:04:44.1 | CARNIERES            | seismic bulletin of UCC and DOU<br>La Nouvelle Gazette: 1967/04/05                                                                                                                                                                                                                                                                                                                                                                                                                                                  |
| 600      | 1967-04-08 | 13:02:05.8 | CARNIERES            | seismic bulletin of UCC and DOU                                                                                                                                                                                                                                                                                                                                                                                                                                                                                     |
| 601      | 1967-04-09 | 04:53:48.6 | CARNIERES            | seismic bulletin of UCC and DOU                                                                                                                                                                                                                                                                                                                                                                                                                                                                                     |
| 602      | 1967-04-14 | 14:27:41.1 | CARNIERES            | seismic bulletin of UCC and DOU                                                                                                                                                                                                                                                                                                                                                                                                                                                                                     |
| 603      | 1968-08-12 | 07:26:41.1 | LA LOUVIERE          | seismic bulletin of UCC, DOU and LUX<br>Official macroseismic survey of the Royal Observatory of Belgium<br>Ahorner, L. (1972). Erdbebenchronik für die Rheinlande 1964-70. Decheniana, 125, Heft ½, 259-283.<br>L'Indépendance (Edition du Centre): 1968/08/13<br>Le Peuple: 1968/08/13                                                                                                                                                                                                                            |
| 604      | 1968-08-13 | 16:17:28.0 | LA LOUVIERE          | seismic bulletin of UCC, DOU and LUX<br>L'Indépendance (Edition du Centre): 1968/08/14-15<br>La Nouvelle Gazette: 1968/08/16                                                                                                                                                                                                                                                                                                                                                                                        |
| 605      | 1968-08-13 | 16:40:40.9 | LA LOUVIERE          | seismic bulletin of UCC, DOU and LUX<br>Ahorner, L. (1972). Erdbebenchronik für die Rheinlande 1964-70. Decheniana, 125, Heft ½, 259-283.                                                                                                                                                                                                                                                                                                                                                                           |
| 606      | 1968-08-13 | 16:57:14.0 | LA LOUVIERE          | seismic bulletin of UCC, DOU and LUX<br>Official macroseismic survey of the Royal Observatory of Belgium<br>Ahorner, L. (1972). Erdbebenchronik für die Rheinlande 1964-70. Decheniana, 125, Heft ½, 259-283.<br>L'Indépendance (Edition du Centre): 1968/08/14-15-16-19<br>La Nouvelle Gazette: 1968/08/14-15-16-20-21<br>Lettre du service incendie de la ville de La Louvière pour le bourgmestre de La Louvière, 20/08/1968<br>Facture du 13/12/1968 de l'entreprise de bâtiments Charles Yernaux à la Louvière |
| 13065    | 1968-08-13 | 19:21:11.2 | LA LOUVIERE          | seismic bulletin of UCC, DOU and LUX                                                                                                                                                                                                                                                                                                                                                                                                                                                                                |
| 607      | 1968-09-23 | 04:08:12.6 | MORLANWELZ-MARIEMONT | seismic bulletin of UCC, DOU, WRM and LUX<br>Official macroseismic survey of the Royal Observatory of Belgium<br>Ahorner, L. (1972). Erdbebenchronik für die Rheinlande 1964-70. Decheniana, 125, Heft ½, 259-283.                                                                                                                                                                                                                                                                                                  |
| 608      | 1968-09-23 | 05:47:16.0 | HAINÉ-SAINT-PIERRE   | seismic bulletin of UCC, DOU, WRM and LUX<br>Official macroseismic survey of the Royal Observatory of Belgium                                                                                                                                                                                                                                                                                                                                                                                                       |
| 611      | 1970-01-16 | 23:34:59.1 | FONTAINE-L'EVEQUE    | seismic bulletin of stations UCC, DOU, WRM, LUX and GIP<br>Ahorner, L. (1972). Erdbebenchronik für die Rheinlande 1964-70. Decheniana, 125, Heft ½, 259-283.                                                                                                                                                                                                                                                                                                                                                        |
| 612      | 1970-11-03 | 08:45:59.6 | MARCHIENNE-AU-PONT   | seismic bulletin of stations UCC, DOU and LUX<br>Official macroseismic survey of the Royal Observatory of Belgium                                                                                                                                                                                                                                                                                                                                                                                                   |
| 613      | 1970-11-03 | 12:07:33.4 | MARCHIENNE-AU-PONT   | seismic bulletin of stations UCC and DOU<br>seismic bulletin of stations UCC, DOU and LUX                                                                                                                                                                                                                                                                                                                                                                                                                           |
| 614      | 1970-12-20 | 13:48:34.1 | LA LOUVIERE          | seismic bulletin of stations UCC and DOU                                                                                                                                                                                                                                                                                                                                                                                                                                                                            |
| 627      | 1976-10-24 | 20:33:28.2 | GIVRY                | seismic bulletin of stations UCC and DOU<br>Official macroseismic survey of the Royal Observatory of Belgium                                                                                                                                                                                                                                                                                                                                                                                                        |

## 4. Sources on the Hainaut Earthquakes

(records, scientific papers, bulletins, macroseismic inquiries and press papers)

| ID_EARTH | DATE       | TIME       | REGION    | SOURCE                                                                                                            |
|----------|------------|------------|-----------|-------------------------------------------------------------------------------------------------------------------|
| 641      | 1982-09-14 | 19:24:34.7 | CARNIERES | seismic bulletin of stations UCC, DOU and MEM<br>Official macroseismic survey of the Royal Observatory of Belgium |
| 642      | 1982-09-14 | 19:29:09.5 | CARNIERES | seismic bulletin of stations UCC, DOU and MEM                                                                     |
| 648      | 1983-08-04 | 07:08:26.3 | CHARLEROI | seismic bulletin of stations UCC, DOU and MEM<br>Official macroseismic survey of the Royal Observatory of Belgium |
| 649      | 1983-08-09 | 01:32:36.8 | CHARLEROI | seismic bulletin of stations UCC, DOU and MEM<br>Official macroseismic survey of the Royal Observatory of Belgium |
