# Supplementary material for: The damaging character of shallow 20th century earthquakes in the Hainaut coal area (Belgium)
Source: Copernicus journal article supplement (doi:10.5194/se-2021-74), 2021-07-13
Supplement: Supplementary file 1 [file se-2021-74-supplement.zip › 449_1911-04-12_CUESMES.csv]

Imin	Imax	lat	lon	Commune	d_epi	azimuth
2	3	50.4136	3.8622	PATURAGES	5.04907819648	234.457445898
3	3	50.4222	3.8467	WASMES	5.57183877085	249.212565687
2	3	50.4342	3.8292	HORNU	6.48294476024	264.323517996
2	2	50.5325	3.9411	MASNUY-SAINT-JEAN	10.3979483123	8.27214661943
2	2	50.5331	3.8847	ERBAUT	10.6550012862	346.414793654
3	3	50.4414	3.9664	HYON	3.29985117577	87.2771026209
3	4	50.4431	3.8653	QUAREGNON	3.90099324851	275.092485127
3	3	50.4458	3.8478	WASMUEL	5.16914446227	277.197806141
3	3	50.4494	3.8878	FLENU	2.51491746183	294.580389764
3	3	50.4733	3.9594	NIMY	4.6421828492	37.0502175091
2	3	50.4668	3.81185	TERTRE	8.23899165884	291.254750144
3	3	50.4693	3.88895	LE LONG CORON (GHLIN)	3.93512953168	325.931277388
3	3	50.4186	3.90303	CRACHET (FRAMERIES)	2.66845523827	206.870593194
3	3	50.4017	3.93218	NOIRCHAIN	4.34742949565	168.510508992
3	3	50.3902	3.88777	EUGIES	5.99457898301	202.479020788
3	3	50.4251	3.9893	SPIENNES	5.19527252936	108.577435303
3	3	50.464	4.01556	SAINT-ANTOINE (HAVRE)	7.29300673626	68.4900937913
3	3	50.4781	3.9025	GHLIN	4.4165946267	343.664878022
3	3	50.4203	3.9447	CIPLY	2.80753868182	141.29985087
3	3	50.4494	3.8878	JEMAPPES	2.51491746183	294.580389764
4	4	50.4381	3.92	CUESMES	0.21135127801	180.0
3	4	50.455	3.948	MONS	2.59603124556	49.9929969829
