# Supplementary material for: The damaging character of shallow 20th century earthquakes in the Hainaut coal area (Belgium)
Source: Copernicus journal article supplement (doi:10.5194/se-2021-74), 2021-07-13
Supplement: Supplementary file 1 [file se-2021-74-supplement.zip › 465_1911-06-01_RANSART.csv]

Imin	Imax	lat	lon	Commune	d_epi	azimuth
3	3	50.61	4.338	NIVELLES	19.7890645456	334.126325459
3	3	50.723	4.61	WAVRE	32.1729540924	19.2219612442
4	4	50.3894	4.5139	BOUFFIOULX	7.75336048864	150.371189403
4	4	50.3917	4.4686	COUILLET	6.51386326315	174.612803673
4	4	50.4075	4.5886	AISEAU	10.2883303701	117.305882852
4	4	50.4175	4.5453	PONT-DE-LOUP	7.05682803618	120.78429435
4	4	50.4194	4.6239	FALISOLLE	12.1319354491	106.231077653
4	4	50.4289	4.5558	FARCIENNES	7.19900666165	108.991219176
4	4	50.4289	4.5731	ROSELIES	8.37044222658	106.240758274
4	4	50.4303	4.5239	PIRONCHAMPS	5.04066060756	115.744148573
4	4	50.4325	4.6158	TAMINES	11.2375197757	99.9155099315
4	4	50.4386	4.5872	MOIGNELEE	9.12393274047	97.9401972216
4	4	50.4403	4.7297	FRANIERE	19.1875691721	93.1197258704
4	4	50.4456	4.6758	HAM-SUR-SAMBRE	15.3355659778	91.745748721
4	4	50.4483	4.6372	AUVELAIS	12.5871525232	90.7925033592
4	4	50.4506	4.3519	SOUVRET	7.67796982163	270.539740194
6	6	50.4506	4.4294	JUMET	2.17435500951	271.770788989
4	4	50.4561	4.7061	MORNIMONT	17.4911201451	87.68182988
4	4	50.4669	4.5981	KEUMIEE	9.98527213385	79.0949577365
4	4	50.4669	4.6697	JEMEPPE-SUR-SAMBRE	15.0093372342	82.72395768
4	4	50.4669	4.6978	MOUSTIER-SUR-SAMBRE	16.990887517	83.5559458935
4	4	50.4722	4.5903	WANFERCEE-BAULET	9.57619105184	75.0056198737
5	5	50.4828	4.5511	FLEURUS	7.4261947567	60.5377682641
5	5	50.4922	4.4075	VIESVILLE	5.99394536299	321.571534223
4	4	50.4994	4.64	BALATRE	13.9092369213	66.6600644234
4	4	50.5028	4.6167	BOIGNEE	12.5787384021	62.1044481738
4	4	50.5042	4.4769	MELLET	6.14730045898	11.2467744522
4	4	50.5042	4.5514	SAINT-AMAND	8.85681713437	47.0639445841
4	4	50.5089	4.3964	LIBERCHIES	7.95657787276	325.457336373
4	4	50.5133	4.5767	LIGNY	10.8714896067	49.5871288799
4	4	50.5228	4.5317	WAGNELEE	9.56416888479	32.1158449272
4	4	50.5236	4.6022	SOMBREFFE	12.9951596664	50.8939320169
4	4	50.5261	4.4789	VILLERS-PERWIN	8.57084808648	8.99613982683
4	4	50.5453	4.5325	MARBAIS	11.7831967704	25.8567263247
4	4	50.6078	5.3181	VERLAINE	63.325613935	73.5763225732
5	5	50.3981	4.4806	MONTIGNIES-SUR-SAMBRE	5.95591999248	165.763580005
5	5	50.4003	4.4489	MARCINELLE	5.58447786911	188.124206967
5	5	50.405	4.527	CHATELET	6.9081719383	136.409953371
5	5	50.4144	4.4272	DAMPREMY	4.59489927979	210.489257604
5	5	50.415	4.431	CHARLEROI	4.40492528547	207.900420125
5	5	50.4236	4.4867	GILLY	3.49602171214	147.130158255
5	5	50.424	4.531	CHATELINEAU	5.81443864395	119.801585059
5	5	50.4319	4.4492	LODELINSART	2.15462011102	200.863580421
4	4	50.4778	4.5194	WANGENIES	5.22984283106	53.7276475312
5	5	50.485	4.4928	HEPPIGNIES	4.53663490957	30.8724738949
5	5	50.4892	4.4728	WAYAUX	4.45421750329	11.7670196357
5	5	50.4903	4.4289	THIMEON	4.99712487755	333.790801739
5	5	50.5319	4.4481	FRASNES-LEZ-GOSSELIES	9.1494875155	354.708890895
5	6	50.4414	4.3922	ROUX	4.90998131781	258.790965017
5	6	50.4564	4.3808	COURCELLES	5.66962124235	277.24408062
6	6	50.4569	4.5533	LAMBUSART	6.67039306537	83.3565519513
6	6	50.4639	4.4742	RANSART	1.84597383551	33.1059247338
6	6	50.4653	4.4292	GOSSELIES	2.77135802686	307.899698136
