# Supplementary material for: The damaging character of shallow 20th century earthquakes in the Hainaut coal area (Belgium)
Source: Copernicus journal article supplement (doi:10.5194/se-2021-74), 2021-07-13
Supplement: Supplementary file 1 [file se-2021-74-supplement.zip › 466_1911-06-03_GOSSELIES.csv]

Imin	Imax	lat	lon	Commune	d_epi	azimuth
0	0	50.4506	4.4294	JUMET	1.79820464559	234.452629264
0	0	50.4828	4.5511	FLEURUS	7.6122507861	70.4992759146
0	0	50.4922	4.4075	VIESVILLE	4.68308857643	319.910237948
5	5	50.3981	4.4806	MONTIGNIES-SUR-SAMBRE	7.22073039081	162.463341925
0	0	50.4003	4.4489	MARCINELLE	6.64132934671	180.674733135
4	4	50.415	4.431	CHARLEROI	5.18448720153	195.098570999
0	0	50.4236	4.4867	GILLY	4.81575095176	147.209753038
4	4	50.424	4.531	CHATELINEAU	7.01029645734	124.805415359
0	0	50.4319	4.4492	LODELINSART	3.12629435989	181.041788147
0	0	50.485	4.4928	HEPPIGNIES	4.11892855423	47.5165785478
0	0	50.4892	4.4728	WAYAUX	3.6290636367	26.477701995
0	0	50.4903	4.4289	THIMEON	3.6883397253	336.04833524
0	0	50.5319	4.4481	FRASNES-LEZ-GOSSELIES	7.99919207607	359.035045035
6	6	50.4639	4.4742	RANSART	1.77227329108	75.8214702406
7	7	50.4653	4.4292	GOSSELIES	1.590236223	291.769168235
0	0	50.4067	4.3961	MARCHIENNE-AU-PONT	7.05818463824	212.879488263
