# Supplementary material for: The damaging character of shallow 20th century earthquakes in the Hainaut coal area (Belgium)
Source: Copernicus journal article supplement (doi:10.5194/se-2021-74), 2021-07-13
Supplement: Supplementary file 1 [file se-2021-74-supplement.zip › 476_1920-01-17_HORNU.csv]

Imin	Imax	lat	lon	Commune	d_epi	azimuth
0	0	50.4136	3.8622	PATURAGES	4.19715940561	134.384986031
5	5	50.4222	3.8467	WASMES	2.74217159852	136.214909503
6	6	50.4342	3.8292	HORNU	0.918394582212	134.624832223
6	6	50.445	3.803	BOUSSU	1.32953115764	294.735995041
0	0	50.4494	3.8878	FLENU	4.92819201763	77.7240865232
0	0	50.4494	3.8878	JEMAPPES	4.92819201763	77.7240865232
0	0	50.455	3.948	MONS	9.24343717503	79.5509881164
0	0	50.4308	3.7675	HAININ	3.8677705408	254.677475531
0	0	50.447	3.821	SAINT-GHISLAIN	0.781896552129	5.21203121748
0	0	50.407	3.83	PETIT-WASMES	3.73898221301	169.03972185
0	0	50.429	3.739	THULIN	5.88349476846	258.027596437
0	0	50.3967	3.7803	DOUR	5.5821536217	210.377081171
