# Supplementary material for: The damaging character of shallow 20th century earthquakes in the Hainaut coal area (Belgium)
Source: Copernicus journal article supplement (doi:10.5194/se-2021-74), 2021-07-13
Supplement: Supplementary file 1 [file se-2021-74-supplement.zip › 488_1931-05-09_HOUDENG-AIMERIES.csv]

Imin	Imax	lat	lon	Commune	d_epi	azimuth
0	0	50.4781	4.1903	LA LOUVIERE	2.86832448072	94.2101304948
4	5	50.4831	4.1511	HOUDENG-AIMERIES	0.353566810337	12.7568029109
0	0	50.4839	4.1564	HOUDENG-GOEGNIES	0.62813265543	46.3147234234
0	0	50.4747	4.1242	STREPY-BRACQUEGNIES	1.92392919787	252.165324277
0	0	50.471	4.15	BOIS-DU-LUC	1.00114393754	180.0
