# Supplementary material for: The damaging character of shallow 20th century earthquakes in the Hainaut coal area (Belgium)
Source: Copernicus journal article supplement (doi:10.5194/se-2021-74), 2021-07-13
Supplement: Supplementary file 1 [file se-2021-74-supplement.zip › 505_1936-11-05_GOUY-LEZ-PIETON.csv]

Imin	Imax	lat	lon	Commune	d_epi	azimuth
4	5	50.4697	4.33	TRAZEGNIES	2.13009940464	90.8860978583
4	5	50.4953	4.2867	GODARVILLE	2.96842391581	341.462819828
4	5	50.4414	4.2981	PIETON	3.18426212148	182.429312384
4	5	50.4833	4.3167	GOUY-LEZ-PIETON	1.89580974657	38.6973789705
4	5	50.4706	4.2858	CHAPELLE-LEZ-HERLAIMONT	1.0103207104	273.793255218
