# Supplementary material for: The damaging character of shallow 20th century earthquakes in the Hainaut coal area (Belgium)
Source: Copernicus journal article supplement (doi:10.5194/se-2021-74), 2021-07-13
Supplement: Supplementary file 1 [file se-2021-74-supplement.zip › 517_1940-01-07_LA LOUVIERE.csv]

Imin	Imax	lat	lon	Commune	d_epi	azimuth
3	3	50.4128	4.1681	BINCHE	6.3642197972	181.215937106
3	3	50.4356	4.1456	PERONNES-LEZ-BINCHE	4.20066929751	204.373108066
3	3	50.4233	4.1919	RESSAIX	5.42269726702	163.321632961
4	4	50.4781	4.1903	LA LOUVIERE	1.69956332873	57.9763497651
3	3	50.5039	4.2353	MANAGE	5.97468100974	50.8390198781
4	4	50.4831	4.1511	HOUDENG-AIMERIES	1.98075882003	317.372688519
4	4	50.4839	4.1564	HOUDENG-GOEGNIES	1.82283640129	328.026523838
3	4	50.4558	4.2061	HAINE-SAINT-PIERRE	3.01089327553	121.62884155
3	4	50.4747	4.2386	LA HESTRE	4.89795597217	83.8459846998
3	4	50.4906	4.2283	FAYT-LEZ-MANAGE	4.73018591693	61.0014804073
3	4	50.4558	4.2442	MORLANWELZ-MARIEMONT	5.50026480061	106.66072998
3	4	50.4553	4.1897	HAINE-SAINT-PAUL	2.15186688713	139.447559813
5	5	50.4525	4.16	SAINT-VAAST	2.07212615157	200.044052758
2	3	50.5711	4.1822	ECAUSSINNES-LALAING	11.2795033609	4.39455359622
2	3	50.5717	4.1778	ECAUSSINNES-D'ENGHIEN	11.3265307367	2.79629908866
3	3	50.4422	4.2561	CARNIERES	6.85193292399	116.795178839
3	3	50.4649	4.2839	BASCOUP	8.106568705	93.9690297438
