# Supplementary material for: The damaging character of shallow 20th century earthquakes in the Hainaut coal area (Belgium)
Source: Copernicus journal article supplement (doi:10.5194/se-2021-74), 2021-07-13
Supplement: Supplementary file 1 [file se-2021-74-supplement.zip › 518_1940-01-07_LA LOUVIERE.csv]

Imin	Imax	lat	lon	Commune	d_epi	azimuth
0	0	50.4831	4.1511	HOUDENG-AIMERIES	3.76461707129	292.792001083
0	0	50.4747	4.2386	LA HESTRE	2.7896762786	79.1833134537
0	0	50.4553	4.1897	HAINE-SAINT-PAUL	1.79129943782	204.100933789
0	0	50.4128	4.1681	BINCHE	6.75427435096	199.615490093
0	0	50.5039	4.2353	MANAGE	4.52729116151	33.5839630415
0	0	50.4906	4.2283	FAYT-LEZ-MANAGE	3.04727858627	41.2264293923
0	0	50.4781	4.1903	LA LOUVIERE	1.13402175801	322.615875218
