# Supplementary material for: The damaging character of shallow 20th century earthquakes in the Hainaut coal area (Belgium)
Source: Copernicus journal article supplement (doi:10.5194/se-2021-74), 2021-07-13
Supplement: Supplementary file 1 [file se-2021-74-supplement.zip › 519_1940-01-09_LA LOUVIERE.csv]

Imin	Imax	lat	lon	Commune	d_epi	azimuth
4	5	50.4781	4.1903	LA LOUVIERE	1.45632880926	98.3368080789
4	4	50.4831	4.1511	HOUDENG-AIMERIES	1.38508011579	284.423665081
4	4	50.4839	4.1564	HOUDENG-GOEGNIES	1.05828812516	294.206007905
3	3	50.4128	4.1681	BINCHE	7.47638863206	181.035036016
3	3	50.4649	4.2839	BASCOUP	8.25846211248	101.691389246
0	0	50.470591	4.147706	Charbonnage-Bois-du-Luc	1.89736381962	236.529778605
0	0	50.468325	4.127189	Charbonnage-Bracquegnies	3.30493619889	246.877742435
0	0	50.462307	4.096242	Charbonnage-Maurage	5.59393782351	249.428930681
0	0	50.415071	4.197836	Charbonnage-Ressaix	7.48827808584	164.679900335
0	0	50.463016	4.25957	Charbonnage-Mariemont	6.63349137052	106.512798813
