# Supplementary material for: The damaging character of shallow 20th century earthquakes in the Hainaut coal area (Belgium)
Source: Copernicus journal article supplement (doi:10.5194/se-2021-74), 2021-07-13
Supplement: Supplementary file 1 [file se-2021-74-supplement.zip › 534_1949-04-03_HAVRE-BOUSSOIT.csv]

Imin	Imax	lat	lon	Commune	d_epi	azimuth
3	3	50.3103	4.1308	ERQUELINNES	17.0395403637	167.738843473
3	3	50.3669	3.9394	QUEVY-LE-PETIT	14.3918132206	224.033794134
2	2	50.3714	3.8794	SARS-LA-BRUYERE	17.33253504	235.423391022
2	2	50.375	4.2344	MONT-SAINTE-GENEVIEVE	14.4852025331	130.689399067
2	2	50.3778	3.6714	MARCHIPONT	30.4450324074	252.679866683
2	2	50.3892	4.2106	BUVRINNES	12.1719798362	130.267444026
3	3	50.3903	3.8883	EUGIES	15.6743336731	240.427553479
2	2	50.3906	4.4058	MONT-SUR-MARCHIENNE	24.4049065834	108.315150125
2	2	50.4067	4.3961	MARCHIENNE-AU-PONT	23.2280688505	104.666483387
3	3	50.4106	4.3819	MONCEAU-SUR-SAMBRE	22.141597289	104.253502549
3	3	50.4136	3.8622	PATURAGES	16.3115331994	251.636967472
3	3	50.415	4.431	CHARLEROI	25.4335376941	101.215391005
3	3	50.4222	3.8467	WASMES	17.0981559058	255.853746822
2	2	50.445	3.803	BOUSSU	19.7433222524	265.258790564
2	3	50.447	3.821	SAINT-GHISLAIN	18.4506889182	265.604643934
2	2	50.4506	4.3519	SOUVRET	19.3376350428	92.9947991243
3	3	50.4697	4.33	TRAZEGNIES	17.7832780544	86.4250180102
3	3	50.4847	4.2561	BELLECOURT	12.7998581755	77.5366783396
2	2	50.4867	4.3289	GOUY-LEZ-PIETON	17.9171251366	80.3622624664
3	3	50.4922	4.4075	VIESVILLE	23.5219648827	81.1147747778
3	3	50.5461	4.1828	MARCHE-LEZ-ECAUSSINNES	12.0383228878	37.2486643808
3	3	50.5528	4.3172	PETIT-ROEULX-LEZ-NIVELLES	19.7410395595	58.3802961758
3	3	50.5636	3.9439	MONTIGNIES-LEZ-LENS	15.0335163895	320.099990458
3	3	50.5711	4.1822	ECAUSSINNES-LALAING	14.3275649302	30.3532397454
3	3	50.5717	4.1778	ECAUSSINNES-D'ENGHIEN	14.2304548898	29.134904586
2	2	50.5944	4.4658	BAISY-THY	31.1752684627	61.194291092
2	2	50.5964	3.8544	BRUGELETTE	22.0479745825	313.57339451
2	2	50.6025	4.2761	BORNIVAL	21.0853933921	41.1795002303
2	2	50.6086	4.0436	HORRUES	16.7304017882	351.140662468
2	2	50.61	4.338	NIVELLES	24.7587203059	47.5285988504
3	3	50.6128	4.1375	BRAINE-LE-COMTE	17.4793679803	13.4642536701
2	2	50.6492	3.5911	SILLY	40.5385513481	301.465352725
3	3	50.6492	3.8481	MESLIN-L'EVEQUE	26.7027893262	322.105000898
3	3	50.6511	4.265	ITTRE	24.9755199234	31.5916883939
2	2	50.6831	4.3717	BRAINE-L'ALLEUD	32.2945998485	39.6702138861
4	4	50.3325	4.3531	GOZEE	24.0464822851	126.037691785
4	4	50.355	4.1722	MERBES-SAINTE-MARIE	13.3932203455	150.664966456
4	4	50.3594	3.9469	QUEVY-LE-GRAND	14.6541172907	220.265372033
4	4	50.38	4.1522	VELLEREILLE-LES-BRAYEUX	10.2723349338	150.004178158
3	3	50.3869	3.9419	BOUGNIES	12.7449506582	230.409461004
3	3	50.4106	3.8942	FRAMERIES	14.2984978983	247.470412487
3	3	50.4289	4.2328	MONT-SAINTE-ALDEGONDE	11.3917809554	107.620027051
3	3	50.4383	4.32	FORCHIES-LA-MARCHE	17.2161958901	97.967373094
3	3	50.4414	4.2981	PIETON	15.6277383886	97.5238680447
3	3	50.4431	3.8653	QUAREGNON	15.363864499	263.054478903
4	4	50.4706	4.2858	CHAPELLE-LEZ-HERLAIMONT	14.6595834936	85.3071566775
3	3	50.4953	4.2867	GODARVILLE	15.1885296767	74.9373667611
3	3	50.5114	4.3628	PONT-A-CELLES	20.8690755808	73.9898765932
4	4	50.5131	4.0161	CASTEAU	7.4468545958	322.509140427
3	3	50.5131	4.0161	CHAUSSEE-NOTRE-DAME-LOUVIGNIES	7.4468545958	322.509140427
4	4	50.5219	4.2119	FAMILLEUREUX	11.6199081134	53.6092096812
3	3	50.5272	4.3631	OBAIX	21.4342302972	69.4798398269
3	3	50.5286	4.1542	MIGNAULT	9.27106884869	34.5756082689
4	4	50.5331	3.9125	JURBISE	14.4004379168	304.44419334
4	4	50.5369	3.9594	MASNUY-SAINT-PIERRE	12.0993261879	315.038043335
3	3	50.5372	4.3669	BUZET	22.0932804177	67.0158390102
3	3	50.7022	4.145	BIERGHES	27.3328946056	9.67172971633
4	4	50.3511	4.1203	PEISSANT	12.4478752793	166.678178573
4	5	50.3611	4.0758	CROIX-LEZ-ROUVEROY	11.0053862387	181.556108249
4	4	50.37	4.1111	FAUROEULX	10.2524661932	167.536977065
3	3	50.3786	4.3797	MONTIGNY-LE-TILLEUL	23.1444670513	112.915201495
4	4	50.38	4.03	GIVRY	9.5822113337	201.786661063
4	4	50.3956	3.9878	HARVENG	9.70775668052	222.479847128
4	4	50.3978	4.3322	LEERNES	19.2095976132	111.014156936
4	4	50.4019	4.0578	VELLEREILLE-LE-SEC	6.6525978758	193.724371924
4	4	50.4028	3.9586	ASQUILLIES	10.718588684	233.632435899
4	4	50.4033	4.2056	EPINOIS	10.9279384482	125.202543889
4	4	50.4081	4.2703	ANDERLUES	14.7014648988	113.049043113
4	4	50.4131	4.1519	WAUDREZ	7.30137748121	135.576789462
4	4	50.4233	4.1919	RESSAIX	8.93605268843	117.140758655
4	4	50.4422	4.2561	CARNIERES	12.662851736	98.9280905844
4	5	50.4494	3.8878	JEMAPPES	13.7003528018	265.13684159
4	4	50.4747	4.2386	LA HESTRE	11.3784454311	81.6762449077
4	4	50.4781	3.9025	GHLIN	12.7615806771	279.145991977
5	5	50.4831	4.1511	HOUDENG-AIMERIES	5.66396112823	62.9928318631
4	5	50.4906	4.0194	SAINT-DENIS	5.4855951531	308.377054671
4	4	50.4906	4.2283	FAYT-LEZ-MANAGE	11.0639152683	72.0247400739
4	4	50.5028	4.1094	LE ROEULX	5.198228321	23.6563609368
4	4	50.5028	4.2178	BOIS-D'HAINE	10.8778961886	63.9911348482
4	4	50.5039	4.2353	MANAGE	12.0559491728	66.045334271
4	4	50.5628	4.2517	FELUY	16.7062058744	46.737680794
4	4	50.586	4.072	SOIGNIES	14.027606866	357.685236244
4	4	50.5892	3.88	CAMBRON-CASTEAU	20.191592987	315.457553451
4	4	50.5997	3.9406	LOMBISE	18.4171374412	327.595856325
5	5	50.4119	4.1058	ESTINNES-AU-VAL	5.65578105814	161.079731694
4	5	50.4119	4.3222	FONTAINE-L'EVEQUE	18.0198474409	107.179540732
4	5	50.4203	3.9447	CIPLY	10.5775580124	245.375320731
5	5	50.4258	3.9875	SPIENNES	7.59258902661	239.96566312
5	5	50.4356	4.1456	PERONNES-LEZ-BINCHE	5.39230843443	120.196354332
5	5	50.4414	3.9664	HYON	8.32930920962	255.660797915
4	5	50.4494	3.8878	FLENU	13.7003528018	265.13684159
5	5	50.455	3.948	MONS	9.39021305676	266.655238665
5	5	50.4553	4.1897	HAINE-SAINT-PAUL	7.80763502326	93.7972367575
5	5	50.4558	4.2061	HAINE-SAINT-PIERRE	8.9668537201	92.9380055998
4	5	50.462	4.254	MORLANWELZ-MARIEMONT	12.3573661302	88.9013269058
5	5	50.4733	3.9594	NIMY	8.68939950762	279.849497395
5	5	50.4733	4.0933	THIEU	1.75513726826	32.5435514335
5	6	50.4781	4.1903	LA LOUVIERE	8.0855305192	75.5383024691
5	5	50.4794	4.0611	GOTTIGNIES	2.54115720109	328.134976572
5	5	50.4839	4.1564	HOUDENG-GOEGNIES	6.04029290725	63.8575455733
5	5	50.5153	4.0497	THIEUSIES	6.51649398983	340.74397724
5	6	50.3836	4.0831	HAULCHIN	8.50137579606	178.513865514
5	6	50.3972	4.0978	ESTINNES-AU-MONT	7.0992800049	169.730574246
5	6	50.4044	4.0194	HARMIGNIES	7.53595884575	214.86794609
5	6	50.4272	3.9608	MESVIN	9.21989021837	246.73441106
6	6	50.4294	4.0406	VILLERS-SAINT-GHISLAIN	4.40668771627	219.442311436
6	6	50.4311	4.1075	BRAY	3.76169049741	148.705763217
5	6	50.4381	3.92	CUESMES	11.6222952326	257.962416266
6	7	50.4475	4.1467	TRIVIERES	4.93680918554	106.333231391
6	6	50.4525	4.16	SAINT-VAAST	5.74212729839	98.3233279931
6	6	50.4556	4.1025	MAURAGE	1.67106946446	107.022634922
6	6	50.4747	4.0081	OBOURG	5.36028566121	287.789393253
6	6	50.4747	4.1242	STREPY-BRACQUEGNIES	3.53860373011	62.4600621647
6	6	50.4794	4.0611	VILLE-SUR-HAINE	2.54115720109	328.134976572
6	7	50.4381	4.0072	SAINT-SYMPHORIEN	5.71580940158	244.80111987
7	7	50.4603	4.0833	BOUSSOIT	0.236694420505	81.8936318635
7	7	50.4664	4.0467	HAVRE	2.46930484957	286.769591619
2	2	50.6	3.85	ATTRE	22.5496074335	313.768894838
3	3	50.3408	4.0161	VILLERS-SIRE-NICOLE-FR	14.0161656824	198.938088303
3	3	50.4053	3.8758	LA BOUVERIE	15.7327318674	247.32611159
3	3	50.4458	3.8478	WASMUEL	16.5663092511	264.618143199
2	3	50.6833	4.4667	ARGENTEUIL-OHAIN	36.9794435832	47.650799186
2	2	50.3167	4.3	FONTAINE-VALMONT	22.3355142516	135.449506811
4	5	50.4128	4.1681	BINCHE	8.16959623924	129.957725973
2	2	50.6333	3.8833	GIBECQ	23.7910252758	324.200893705
2	2	50.9	4.6667	HERENT	64.150389193	40.0447177813
4	4	50.4003	4.4489	MARCINELLE	27.0399618409	104.074728872
3	3	50.3239	4.165	MERBES-LE-CHATEAU	16.3013425005	158.202619127
2	3	50.5986	4.2894	MONSTREUX	21.4046350895	43.8400034621
2	2	51.1667	4.4639	MORTSEL	83.1420190605	18.8429153201
2	2	50.466	4.864	NAMUR	55.671550178	89.0107795899
3	4	50.5333	4.4167	REVES	25.2434652566	71.0253628374
2	2	50.398	4.481	MONTIGNIES-SUR-SAMBRE	29.3160985006	103.45193816
2	2	50.412	3.969	NOUVELLES	9.52357801378	235.942011779
