# Supplementary material for: The damaging character of shallow 20th century earthquakes in the Hainaut coal area (Belgium)
Source: Copernicus journal article supplement (doi:10.5194/se-2021-74), 2021-07-13
Supplement: Supplementary file 1 [file se-2021-74-supplement.zip › 534_ROB_official_report.pdf]

# Royal Observatory of Belgium Official Macroseismic Inquiry

**HAVRE-BOUSSOIT**

1949-04-03 12:33:40

Magnitude  $M_w=4.1$

50.46°N 4.08°E 2.2 km

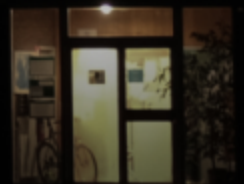



# Official Inquiries

|                                | Country | Latitude | Longitude | Epicentral Distance | Imin | Imax |
|--------------------------------|---------|----------|-----------|---------------------|------|------|
| ANDERLUES                      | BE      | 50.408   | 4.27      | 14.7                | 4    | 4    |
| ASQUILLIES                     | BE      | 50.403   | 3.959     | 10.7                | 4    | 4    |
| ATTRE                          | BE      | 50.608   | 3.84      | 22.5                | 2    | 2    |
| BAISY-THY                      | BE      | 50.594   | 4.466     | 31.2                | 2    | 2    |
| BELLECOURT                     | BE      | 50.485   | 4.256     | 12.8                | 3    | 3    |
| BINCHE                         | BE      | 50.413   | 4.168     | 8.2                 | 4    | 5    |
| BOIS-D'HAINE                   | BE      | 50.503   | 4.218     | 10.9                | 4    | 4    |
| BOUGNIES                       | BE      | 50.387   | 3.942     | 12.7                | 3    | 3    |
| BOUSSOIT                       | BE      | 50.46    | 4.083     | 0.2                 | 7    | 7    |
| BRAINE-LE-COMTE                | BE      | 50.613   | 4.138     | 17.5                | 3    | 3    |
| BRAY                           | BE      | 50.431   | 4.108     | 3.8                 | 6    | 6    |
| BUVRINNES                      | BE      | 50.389   | 4.211     | 12.2                | 2    | 2    |
| BUZET                          | BE      | 50.537   | 4.367     | 22.1                | 3    | 3    |
| CAMBRON-CASTEAU                | BE      | 50.589   | 3.88      | 20.2                | 4    | 4    |
| CARNIERES                      | BE      | 50.442   | 4.256     | 12.7                | 4    | 4    |
| CASTEAU                        | BE      | 50.513   | 4.016     | 7.4                 | 4    | 4    |
| CHAPELLE-LEZ-HERLAIMONT        | BE      | 50.471   | 4.286     | 14.7                | 4    | 4    |
| CHARLEROI                      | BE      | 50.415   | 4.431     | 25.4                | 3    | 3    |
| CHAUSSÉE-NOTRE-DAME-LOUVIGNIES | BE      | 50.513   | 4.016     | 7.4                 | 3    | 3    |
| CIPLY                          | BE      | 50.42    | 3.945     | 10.6                | 4    | 5    |
| CROIX-LEZ-ROUVEROY             | BE      | 50.361   | 4.076     | 11                  | 4    | 5    |
| ECAUSSINNES-D'ENGHIEN          | BE      | 50.572   | 4.178     | 14.2                | 3    | 3    |
| ECAUSSINNES-LALAING            | BE      | 50.571   | 4.182     | 14.3                | 3    | 3    |
| EPINOIS                        | BE      | 50.403   | 4.206     | 10.9                | 4    | 4    |
| ERQUELINNES                    | BE      | 50.31    | 4.131     | 17                  | 3    | 3    |
| ESTINNES-AU-MONT               | BE      | 50.397   | 4.098     | 7.1                 | 5    | 6    |
| ESTINNES-AU-VAL                | BE      | 50.412   | 4.106     | 5.7                 | 5    | 5    |
| EUGIES                         | BE      | 50.39    | 3.888     | 15.7                | 3    | 3    |
| FAMILLEUREUX                   | BE      | 50.522   | 4.212     | 11.6                | 4    | 4    |
| FAUROEULX                      | BE      | 50.37    | 4.111     | 10.3                | 4    | 4    |
| FAYT-LEZ-MANAGE                | BE      | 50.491   | 4.228     | 11.1                | 4    | 4    |
| FELUY                          | BE      | 50.563   | 4.252     | 16.7                | 4    | 4    |
| FLENU                          | BE      | 50.449   | 3.888     | 13.7                | 4    | 5    |
| FONTAINE-L'EVEQUE              | BE      | 50.412   | 4.322     | 18                  | 4    | 5    |
| FORCHIES-LA-MARCHE             | BE      | 50.438   | 4.32      | 17.2                | 3    | 3    |
| FRAMERIES                      | BE      | 50.411   | 3.894     | 14.3                | 3    | 3    |
| GHLIN                          | BE      | 50.478   | 3.902     | 12.8                | 4    | 4    |
| GIBECQ                         | BE      | 50.639   | 3.889     | 23.8                | 2    | 2    |
| GIVRY                          | BE      | 50.38    | 4.03      | 9.6                 | 4    | 4    |
| GODARVILLE                     | BE      | 50.495   | 4.287     | 15.2                | 3    | 3    |
| GOTTIGNIES                     | BE      | 50.479   | 4.061     | 2.5                 | 5    | 5    |
| GOUY-LEZ-PIETON                | BE      | 50.487   | 4.329     | 17.9                | 2    | 2    |
| GOZEE                          | BE      | 50.332   | 4.353     | 24                  | 4    | 4    |
| HAINE-SAINT-PAUL               | BE      | 50.455   | 4.19      | 7.8                 | 5    | 5    |
| HAINE-SAINT-PIERRE             | BE      | 50.456   | 4.206     | 9                   | 5    | 5    |
| HARMIGNIES                     | BE      | 50.404   | 4.019     | 7.5                 | 5    | 6    |
| HARVENG                        | BE      | 50.396   | 3.988     | 9.7                 | 4    | 4    |
| HAULCHIN                       | BE      | 50.384   | 4.083     | 8.5                 | 5    | 6    |
| HAVRE                          | BE      | 50.466   | 4.047     | 2.5                 | 7    | 7    |
| HORRUES                        | BE      | 50.609   | 4.044     | 16.7                | 2    | 2    |
| HOUDENG-AIMERIES               | BE      | 50.483   | 4.151     | 5.7                 | 5    | 5    |
| HOUDENG-GOEGNIES               | BE      | 50.484   | 4.156     | 6                   | 5    | 5    |
| HYON                           | BE      | 50.441   | 3.966     | 8.3                 | 5    | 5    |
| ITTRE                          | BE      | 50.651   | 4.265     | 25                  | 3    | 3    |

|                           | Country | Latitude | Longitude | Epicentral Distance | Imin | Imax |
|---------------------------|---------|----------|-----------|---------------------|------|------|
| JEMAPPES                  | BE      | 50.449   | 3.888     | 13.7                | 4    | 5    |
| JURBISE                   | BE      | 50.533   | 3.912     | 14.4                | 4    | 4    |
| LA HESTRE                 | BE      | 50.475   | 4.239     | 11.4                | 4    | 4    |
| LA LOUVIERE               | BE      | 50.478   | 4.19      | 8.1                 | 5    | 6    |
| LE ROEULX                 | BE      | 50.503   | 4.109     | 5.2                 | 4    | 4    |
| LEERNES                   | BE      | 50.398   | 4.332     | 19.2                | 4    | 4    |
| LOMBISE                   | BE      | 50.6     | 3.941     | 18.4                | 4    | 4    |
| MANAGE                    | BE      | 50.504   | 4.235     | 12.1                | 4    | 4    |
| MARCHE-LEZ-ECAUSSINNES    | BE      | 50.546   | 4.183     | 12                  | 3    | 3    |
| MARCHIENNE-AU-PONT        | BE      | 50.407   | 4.396     | 23.2                | 2    | 2    |
| MASNUY-SAINT-PIERRE       | BE      | 50.537   | 3.959     | 12.1                | 4    | 4    |
| MAURAGE                   | BE      | 50.456   | 4.102     | 1.7                 | 6    | 6    |
| MERBES-LE-CHATEAU         | BE      | 50.324   | 4.165     | 16.3                | 3    | 3    |
| MERBES-SAINTE-MARIE       | BE      | 50.355   | 4.172     | 13.4                | 4    | 4    |
| MESLIN-L'EVEQUE           | BE      | 50.649   | 3.848     | 26.7                | 3    | 3    |
| MESVIN                    | BE      | 50.427   | 3.961     | 9.2                 | 5    | 6    |
| MIGNAULT                  | BE      | 50.529   | 4.154     | 9.3                 | 3    | 3    |
| MONCEAU-SUR-SAMBRE        | BE      | 50.411   | 4.382     | 22.1                | 3    | 3    |
| MONS                      | BE      | 50.455   | 3.948     | 9.4                 | 5    | 5    |
| MONSTREUX                 | BE      | 50.599   | 4.289     | 21.4                | 2    | 3    |
| MONT-SAINTE-ALDEGONDE     | BE      | 50.429   | 4.233     | 11.4                | 3    | 3    |
| MONT-SAINTE-GENEVIEVE     | BE      | 50.375   | 4.234     | 14.5                | 2    | 2    |
| MONT-SUR-MARCHIENNE       | BE      | 50.391   | 4.406     | 24.4                | 2    | 2    |
| MONTIGNIES-LEZ-LENS       | BE      | 50.564   | 3.944     | 15                  | 3    | 3    |
| MONTIGNIES-SUR-SAMBRE     | BE      | 50.398   | 4.481     | 29.3                | 2    | 2    |
| MORLANWELZ-MARIEMONT      | BE      | 50.456   | 4.244     | 12.4                | 4    | 5    |
| NIMY                      | BE      | 50.473   | 3.959     | 8.7                 | 5    | 5    |
| NIVELLES                  | BE      | 50.61    | 4.338     | 24.8                | 2    | 2    |
| NOUVELLES                 | BE      | 50.412   | 3.969     | 9.5                 | 2    | 2    |
| OBAIX                     | BE      | 50.527   | 4.363     | 21.4                | 3    | 3    |
| OBOURG                    | BE      | 50.475   | 4.008     | 5.4                 | 6    | 6    |
| PATURAGES                 | BE      | 50.414   | 3.862     | 16.3                | 3    | 3    |
| PEISSANT                  | BE      | 50.351   | 4.12      | 12.4                | 4    | 4    |
| PERONNES-LEZ-BINCHE       | BE      | 50.436   | 4.146     | 5.4                 | 5    | 5    |
| PETIT-ROEULX-LEZ-NIVELLES | BE      | 50.553   | 4.317     | 19.7                | 3    | 3    |
| PONT-A-CELLES             | BE      | 50.511   | 4.363     | 20.9                | 3    | 3    |
| QUEVY-LE-GRAND            | BE      | 50.359   | 3.947     | 14.7                | 4    | 4    |
| QUEVY-LE-PETIT            | BE      | 50.367   | 3.939     | 14.4                | 3    | 3    |
| RESSAIX                   | BE      | 50.423   | 4.192     | 8.9                 | 4    | 4    |
| REVES                     | BE      | 50.538   | 4.416     | 25.2                | 3    | 4    |
| SAINT-DENIS               | BE      | 50.491   | 4.019     | 5.5                 | 4    | 5    |
| SAINT-GHISLAIN            | BE      | 50.447   | 3.821     | 18.5                | 2    | 3    |
| SAINT-SYMPHORIEN          | BE      | 50.438   | 4.007     | 5.7                 | 6    | 7    |
| SAINT-VAAST               | BE      | 50.452   | 4.16      | 5.7                 | 6    | 6    |
| SARS-LA-BRUYERE           | BE      | 50.371   | 3.879     | 17.3                | 2    | 2    |
| SILLY                     | BE      | 50.649   | 3.591     | 40.5                | 2    | 2    |
| SOIGNIES                  | BE      | 50.586   | 4.072     | 14                  | 4    | 4    |
| SOUVRET                   | BE      | 50.451   | 4.352     | 19.3                | 2    | 2    |
| SPIENNES                  | BE      | 50.426   | 3.988     | 7.6                 | 5    | 5    |
| STREPY-BRACQUEGNIES       | BE      | 50.475   | 4.124     | 3.5                 | 6    | 6    |
| THIEU                     | BE      | 50.473   | 4.093     | 1.8                 | 5    | 5    |
| THIEUSIES                 | BE      | 50.515   | 4.05      | 6.5                 | 5    | 5    |
| TRAZEGNIES                | BE      | 50.47    | 4.33      | 17.8                | 3    | 3    |
| TRIVIERES                 | BE      | 50.448   | 4.147     | 4.9                 | 6    | 7    |
| VELLEREILLE-LE-SEC        | BE      | 50.402   | 4.058     | 6.7                 | 4    | 4    |
| VELLEREILLE-LES-BRAYEUX   | BE      | 50.38    | 4.152     | 10.3                | 4    | 4    |
| VIESVILLE                 | BE      | 50.492   | 4.408     | 23.5                | 3    | 3    |
| VILLE-SUR-HAINE           | BE      | 50.479   | 4.061     | 2.5                 | 6    | 6    |
| VILLERS-SAINT-GHISLAIN    | BE      | 50.429   | 4.041     | 4.4                 | 6    | 6    |
| WASMES                    | BE      | 50.422   | 3.847     | 17.1                | 3    | 3    |

WAUDREZ

| Country | Latitude | Longitude | Epicentral Distance | Imin | Imax |
|---------|----------|-----------|---------------------|------|------|
| BE      | 50.413   | 4.152     | 7.3                 | 4    | 4    |



# Additional Intensities from other sources

|            | Imin | Imax | Latitude | Longitude | Commune                | Epicentral Distance |
|------------|------|------|----------|-----------|------------------------|---------------------|
| <b>121</b> | 2    | 3    | 50.683   | 4.467     | ARGENTEUIL-OHAIN       | 37.0                |
| <b>56</b>  | 3    | 3    | 50.702   | 4.145     | BIERGHERS              | 27.3                |
| <b>34</b>  | 2    | 2    | 50.683   | 4.372     | BRAINE-L'ALLEUD        | 32.3                |
| <b>26</b>  | 2    | 2    | 50.596   | 3.854     | BRUGELETTE             | 22.0                |
| <b>107</b> | 5    | 6    | 50.438   | 3.920     | CUESMES                | 11.6                |
| <b>122</b> | 2    | 2    | 50.317   | 4.300     | FONTAINE-VALMONT       | 22.3                |
| <b>125</b> | 2    | 2    | 50.900   | 4.667     | HERENT                 | 64.2                |
| <b>4</b>   | 2    | 2    | 50.378   | 3.671     | MARCHIPONT             | 30.4                |
| <b>126</b> | 4    | 4    | 50.400   | 4.449     | MARCINELLE             | 27.0                |
| <b>60</b>  | 3    | 3    | 50.379   | 4.380     | MONTIGNY-LE-TILLEUL    | 23.1                |
| <b>129</b> | 2    | 2    | 51.167   | 4.464     | MORTSEL                | 83.1                |
| <b>130</b> | 2    | 2    | 50.466   | 4.864     | NAMUR                  | 55.7                |
| <b>43</b>  | 3    | 3    | 50.441   | 4.298     | PIETON                 | 15.6                |
| <b>44</b>  | 3    | 3    | 50.443   | 3.865     | QUAREGNON              | 15.4                |
| <b>118</b> | 3    | 3    | 50.341   | 4.016     | VILLERS-SIRE-NICOLE-FR | 14.0                |

# Individual Formulaires

## Official inquiry for ANDERLUES (BE)

Location: 50.408°N 4.27°E, at 14.7 km from the epicentre.

Imin: 4 - Imax: 4

### 1

☒ **Yes** | ☐ **No** - A small number of inhabitants, especially those on the upper floors of the houses, noticed a tremor accompanied by a noise comparable to that produced by a heavy car-truck launched at full speed.

Remark:

☒ **Yes** | ☐ **No** - The trembling of movable objects?

### 2. A large number of people have observed

☐ **Yes** | ☒ **No** - The shock of glasses or crockery placed very close together?

☐ **Yes** | ☒ **No** - The shivering of windows and doors?

☐ **Yes** | ☒ **No** - The creaking of floors?

☐ **Yes** | ☒ **No** - The rustle of ceilings?

☒ **Yes** | ☐ **No** - A loud rumbling sound accompanied the shaking?

☐ **Yes** | ☒ **No** - A number of sleepers woke up?

Note: **Les chiens ont également aboyé**

### 3

☐ **Yes** | ☒ **No** - The tremor was perceived by people outdoors?

☒ **Yes** | ☐ **No** - Inside the houses, everyone was aware of it due to the shaking of the whole construction?

☐ **Yes** | ☒ **No** - It was as if a heavy vehicle, thrown at full speed, had bumped into the house or a heavy object had overturned in one of the rooms.

☒ **Yes** | ☐ **No** - We swayed with the chairs, beds, etc...

☒ **Yes** | ☐ **No** - Freely suspended objects swayed?

☐ **Yes** | ☒ **No** - Light objects have been moved?

☐ **Yes** | ☒ **No** - Objects placed on top of furniture have fallen down?

☐ **Yes** | ☒ **No** - Doors and windows knocked?

☐ **Yes** | ☒ **No** - Windows broke?

☐ **Yes** | ☒ **No** - All the sleepers woke up?

☐ **Yes** | ☒ **No** - A few frightened people came out of the houses?

Remark:

### 4

☐ **Yes** | ☒ **No** - Frames have fallen off the walls?

☐ **Yes** | ☒ **No** - Dishes have broken?

☐ **Yes** | ☒ **No** - Furniture has been moved?

☐ **Yes** | ☒ **No** - Light furniture has been knocked over?

☐ **Yes** | ☒ **No** - Small fragments of plaster have fallen from ceilings and walls?

☐ **Yes** | ☒ **No** - Large numbers of people have left their homes in a hurry?

☒ **Yes** | ☐ **No** - Some people had the feeling that they were going to fall?

Remark:

### 5. In houses:

☐ **Yes** | ☒ **No** - Heavy pieces of furniture have been knocked over?

☐ **Yes** | ☒ **No** - Plastered ceiling have fallen down?

☐ **Yes** | ☒ **No** - Chimneys have collapsed?

☐ **Yes** | ☒ **No** - Walls were cracked?

☐ **Yes** | ☒ **No** - Landslides have occurred along the banks or embankments.

Remark: **La secousse a été spécialement remarqué par Lambert Jules rue de la Victoire n°1 a Anderlues**

Additional comments:

## Official inquiry for ASQUILLIES (BE)

Location: 50.403°N 3.959°E, at 10.7 km from the epicentre.

**Imin: 4 - Imax: 4**

---

### 1

☐ Yes | ☒ **No** - A small number of inhabitants, especially those on the upper floors of the houses, noticed a tremor accompanied by a noise comparable to that produced by a heavy car-truck launched at full speed.

Remark:

☐ Yes | ☒ **No** - The trembling of movable objects?

### 2. A large number of people have observed

☐ Yes | ☒ **No** - The shock of glasses or crockery placed very close together?

☒ **Yes** | ☐ No - The shivering of windows and doors?

☐ Yes | ☒ **No** - The creaking of floors?

☐ Yes | ☒ **No** - The rustle of ceilings?

☒ **Yes** | ☐ No - A loud rumbling sound accompanied the shaking?

☐ Yes | ☒ **No** - A number of sleepers woke up?

Note:

### 3

☐ Yes | ☒ **No** - The tremor was perceived by people outdoors?

☒ **Yes** | ☐ No - Inside the houses, everyone was aware of it due to the shaking of the whole construction?

☒ **Yes** | ☐ No - It was as if a heavy vehicle, thrown at full speed, had bumped into the house or a heavy object had overturned in one of the rooms.

☐ Yes | ☒ **No** - We swayed with the chairs, beds, etc...

☐ Yes | ☒ **No** - Freely suspended objects swayed?

☐ Yes | ☒ **No** - Light objects have been moved?

☐ Yes | ☒ **No** - Objects placed on top of furniture have fallen down?

☐ Yes | ☒ **No** - Doors and windows knocked?

☐ Yes | ☒ **No** - Windows broke?

☐ Yes | ☒ **No** - All the sleepers woke up?

☒ **Yes** | ☐ No - A few frightened people came out of the houses?

Remark:

### 4

☐ Yes | ☒ **No** - Frames have fallen off the walls?

☐ Yes | ☒ **No** - Dishes have broken?

☐ Yes | ☒ **No** - Furniture has been moved?

☐ Yes | ☒ **No** - Light furniture has been knocked over?

☐ Yes | ☒ **No** - Small fragments of plaster have fallen from ceilings and walls?

☐ Yes | ☒ **No** - Large numbers of people have left their homes in a hurry?

☐ Yes | ☒ **No** - Some people had the feeling that they were going to fall?

Remark:

### 5. In houses:

☐ Yes | ☒ **No** - Heavy pieces of furniture have been knocked over?

☐ Yes | ☒ **No** - Plastered ceiling have fallen down?

☐ Yes | ☒ **No** - Chimneys have collapsed?

☐ Yes | ☒ **No** - Walls were cracked?

☐ Yes | ☒ **No** - Landslides have occurred along the banks or embankments.

Remark:

Additional comments:

## Official inquiry for ATTRE (BE)

Location: 50.608°N 3.84°E, at 22.5 km from the epicentre.

**Imin: 2 - Imax: 2**

### 1

☒ **Yes** | ☐ No - A small number of inhabitants, especially those on the upper floors of the houses, noticed a tremor accompanied by a noise comparable to that produced by a heavy car-truck launched at full speed.

Remark:

☒ **Yes** | ☐ No - The trembling of movable objects?

### 2. A large number of people have observed

☒ **Yes** | ☐ No - The shock of glasses or crockery placed very close together?

☒ **Yes** | ☐ No - The shivering of windows and doors?

☒ **Yes** | ☐ No - The creaking of floors?

☒ **Yes** | ☐ No - The rustle of ceilings?

☒ **Yes** | ☐ No - A loud rumbling sound accompanied the shaking?

☒ **Yes** | ☐ No - A number of sleepers woke up?

Note:

### 3

☐ Yes | ☒ **No** - The tremor was perceived by people outdoors?

☐ Yes | ☒ **No** - Inside the houses, everyone was aware of it due to the shaking of the whole construction?

☐ Yes | ☒ **No** - It was as if a heavy vehicle, thrown at full speed, had bumped into the house or a heavy object had overturned in one of the rooms.

☐ Yes | ☒ **No** - We swayed with the chairs, beds, etc...

☐ Yes | ☒ **No** - Freely suspended objects swayed?

☐ Yes | ☒ **No** - Light objects have been moved?

☐ Yes | ☒ **No** - Objects placed on top of furniture have fallen down?

☐ Yes | ☒ **No** - Doors and windows knocked?

☐ Yes | ☒ **No** - Windows broke?

☐ Yes | ☒ **No** - All the sleepers woke up?

☐ Yes | ☒ **No** - A few frightened people came out of the houses?

Remark:

### 4

☐ Yes | ☒ **No** - Frames have fallen off the walls?

☐ Yes | ☒ **No** - Dishes have broken?

☐ Yes | ☒ **No** - Furniture has been moved?

☐ Yes | ☒ **No** - Light furniture has been knocked over?

☐ Yes | ☒ **No** - Small fragments of plaster have fallen from ceilings and walls?

☐ Yes | ☒ **No** - Large numbers of people have left their homes in a hurry?

☐ Yes | ☒ **No** - Some people had the feeling that they were going to fall?

Remark:

### 5. In houses:

☐ Yes | ☒ **No** - Heavy pieces of furniture have been knocked over?

☐ Yes | ☒ **No** - Plastered ceiling have fallen down?

☐ Yes | ☒ **No** - Chimneys have collapsed?

☐ Yes | ☒ **No** - Walls were cracked?

☐ Yes | ☒ **No** - Landslides have occurred along the banks or embankments.

Remark:

Additional comments: **Ces constatations ont été faites par le Bourgmestre le 14 avril à 6H15 ainsi que par Me Dugauquier Gabrielle à la même heure**

## Official inquiry for BAISY-THY (BE)

Location: 50.594°N 4.466°E, at 31.2 km from the epicentre.

**Imin: 2 - Imax: 2**

### 1

☒ **Yes** | ☐ **No** - A small number of inhabitants, especially those on the upper floors of the houses, noticed a tremor accompanied by a noise comparable to that produced by a heavy car-truck launched at full speed.

Remark:

☐ Yes | ☒ **No** - The trembling of movable objects?

### 2. A large number of people have observed

☐ Yes | ☒ **No** - The shock of glasses or crockery placed very close together?

☐ Yes | ☒ **No** - The shivering of windows and doors?

☐ Yes | ☒ **No** - The creaking of floors?

☐ Yes | ☒ **No** - The rustle of ceilings?

☐ Yes | ☒ **No** - A loud rumbling sound accompanied the shaking?

☐ Yes | ☒ **No** - A number of sleepers woke up?

Note:

### 3

☐ Yes | ☒ **No** - The tremor was perceived by people outdoors?

☐ Yes | ☒ **No** - Inside the houses, everyone was aware of it due to the shaking of the whole construction?

☐ Yes | ☒ **No** - It was as if a heavy vehicle, thrown at full speed, had bumped into the house or a heavy object had overturned in one of the rooms.

☐ Yes | ☒ **No** - We swayed with the chairs, beds, etc...

☐ Yes | ☒ **No** - Freely suspended objects swayed?

☐ Yes | ☒ **No** - Light objects have been moved?

☐ Yes | ☒ **No** - Objects placed on top of furniture have fallen down?

☐ Yes | ☒ **No** - Doors and windows knocked?

☐ Yes | ☒ **No** - Windows broke?

☐ Yes | ☒ **No** - All the sleepers woke up?

☐ Yes | ☒ **No** - A few frightened people came out of the houses?

Remark:

### 4

☐ Yes | ☒ **No** - Frames have fallen off the walls?

☐ Yes | ☒ **No** - Dishes have broken?

☐ Yes | ☒ **No** - Furniture has been moved?

☐ Yes | ☒ **No** - Light furniture has been knocked over?

☐ Yes | ☒ **No** - Small fragments of plaster have fallen from ceilings and walls?

☐ Yes | ☒ **No** - Large numbers of people have left their homes in a hurry?

☐ Yes | ☒ **No** - Some people had the feeling that they were going to fall?

Remark:

### 5. In houses:

☐ Yes | ☒ **No** - Heavy pieces of furniture have been knocked over?

☐ Yes | ☒ **No** - Plastered ceiling have fallen down?

☐ Yes | ☒ **No** - Chimneys have collapsed?

☐ Yes | ☒ **No** - Walls were cracked?

☐ Yes | ☒ **No** - Landslides have occurred along the banks or embankments.

Remark:

Additional comments: **L'ingénieur Fern. de Looze affirme avoir ressenti un fort tremblement dans sa maison de campagne a Baisy Thy au hameau Tangissart mais que sa famille dans la pièce n'a rien senti.**

## Official inquiry for BELLECOURT (BE)

Location: 50.485°N 4.256°E, at 12.8 km from the epicentre.

**Imin: 3 - Imax: 3**

---

### 1

☒ **Yes** | ☐ **No** - A small number of inhabitants, especially those on the upper floors of the houses, noticed a tremor accompanied by a noise comparable to that produced by a heavy car-truck launched at full speed.

Remark:

☐ Yes | ☒ **No** - The trembling of movable objects?

### 2. A large number of people have observed

☐ Yes | ☒ **No** - The shock of glasses or crockery placed very close together?

☐ Yes | ☒ **No** - The shivering of windows and doors?

☐ Yes | ☒ **No** - The creaking of floors?

☐ Yes | ☒ **No** - The rustle of ceilings?

☐ Yes | ☒ **No** - A loud rumbling sound accompanied the shaking?

☐ Yes | ☒ **No** - A number of sleepers woke up?

Note:

### 3

☐ Yes | ☒ **No** - The tremor was perceived by people outdoors?

☐ Yes | ☒ **No** - Inside the houses, everyone was aware of it due to the shaking of the whole construction?

☐ Yes | ☒ **No** - It was as if a heavy vehicle, thrown at full speed, had bumped into the house or a heavy object had overturned in one of the rooms.

☒ **Yes** | ☐ **No** - We swayed with the chairs, beds, etc...

☐ Yes | ☒ **No** - Freely suspended objects swayed?

☐ Yes | ☒ **No** - Light objects have been moved?

☐ Yes | ☒ **No** - Objects placed on top of furniture have fallen down?

☐ Yes | ☒ **No** - Doors and windows knocked?

☐ Yes | ☒ **No** - Windows broke?

☐ Yes | ☒ **No** - All the sleepers woke up?

☒ **Yes** | ☐ **No** - A few frightened people came out of the houses?

Remark:

### 4

☐ Yes | ☒ **No** - Frames have fallen off the walls?

☐ Yes | ☒ **No** - Dishes have broken?

☐ Yes | ☒ **No** - Furniture has been moved?

☐ Yes | ☒ **No** - Light furniture has been knocked over?

☐ Yes | ☒ **No** - Small fragments of plaster have fallen from ceilings and walls?

☐ Yes | ☒ **No** - Large numbers of people have left their homes in a hurry?

☐ Yes | ☒ **No** - Some people had the feeling that they were going to fall?

Remark:

### 5. In houses:

☐ Yes | ☒ **No** - Heavy pieces of furniture have been knocked over?

☐ Yes | ☒ **No** - Plastered ceiling have fallen down?

☐ Yes | ☒ **No** - Chimneys have collapsed?

☐ Yes | ☒ **No** - Walls were cracked?

☐ Yes | ☒ **No** - Landslides have occurred along the banks or embankments.

Remark:

Additional comments:

## Official inquiry for BINCHE (BE)

Location: 50.413°N 4.168°E, at 8.2 km from the epicentre.

**Imin: 4 - Imax: 5**

### 1

☒ **Yes** | ☐ No - A small number of inhabitants, especially those on the upper floors of the houses, noticed a tremor accompanied by a noise comparable to that produced by a heavy car-truck launched at full speed.

Remark:

☒ **Yes** | ☐ No - The trembling of movable objects?

### 2. A large number of people have observed

☒ **Yes** | ☐ No - The shock of glasses or crockery placed very close together?

☒ **Yes** | ☐ No - The shivering of windows and doors?

☐ Yes | ☒ **No** - The creaking of floors?

☐ Yes | ☒ **No** - The rustle of ceilings?

☐ Yes | ☒ **No** - A loud rumbling sound accompanied the shaking?

☒ **Yes** | ☐ No - A number of sleepers woke up?

Note:

### 3

☒ **Yes** | ☐ No - The tremor was perceived by people outdoors?

☒ **Yes** | ☐ No - Inside the houses, everyone was aware of it due to the shaking of the whole construction?

☒ **Yes** | ☐ No - It was as if a heavy vehicle, thrown at full speed, had bumped into the house or a heavy object had overturned in one of the rooms.

☐ Yes | ☒ **No** - We swayed with the chairs, beds, etc...

☐ Yes | ☒ **No** - Freely suspended objects swayed?

☐ Yes | ☒ **No** - Light objects have been moved?

☐ Yes | ☒ **No** - Objects placed on top of furniture have fallen down?

☐ Yes | ☒ **No** - Doors and windows knocked?

☐ Yes | ☒ **No** - Windows broke?

☐ Yes | ☒ **No** - All the sleepers woke up?

☐ Yes | ☒ **No** - A few frightened people came out of the houses?

Remark:

### 4

☐ Yes | ☒ **No** - Frames have fallen off the walls?

☐ Yes | ☒ **No** - Dishes have broken?

☐ Yes | ☒ **No** - Furniture has been moved?

☐ Yes | ☒ **No** - Light furniture has been knocked over?

☐ Yes | ☒ **No** - Small fragments of plaster have fallen from ceilings and walls?

☐ Yes | ☒ **No** - Large numbers of people have left their homes in a hurry?

☐ Yes | ☒ **No** - Some people had the feeling that they were going to fall?

Remark:

### 5. In houses:

☐ Yes | ☒ **No** - Heavy pieces of furniture have been knocked over?

☐ Yes | ☒ **No** - Plastered ceiling have fallen down?

☐ Yes | ☒ **No** - Chimneys have collapsed?

☐ Yes | ☒ **No** - Walls were cracked?

☐ Yes | ☒ **No** - Landslides have occurred along the banks or embankments.

Remark:

Additional comments: **Mr Gustave, fossoyeur, affirme que trois tuiles se sont arrachées de son toit durant la secousse.**

# Official inquiry for BOIS-D'HAINE (BE)

Location: 50.503°N 4.218°E, at 10.9 km from the epicentre.

**Imin: 4 - Imax: 4**

## 1

☐ Yes | ☒ **No** - A small number of inhabitants, especially those on the upper floors of the houses, noticed a tremor accompanied by a noise comparable to that produced by a heavy car-truck launched at full speed.

Remark:

☒ **Yes** | ☐ No - The trembling of movable objects?

## 2. A large number of people have observed

☒ **Yes** | ☐ No - The shock of glasses or crockery placed very close together?

☒ **Yes** | ☐ No - The shivering of windows and doors?

☒ **Yes** | ☐ No - The creaking of floors?

☒ **Yes** | ☐ No - The rustle of ceilings?

☒ **Yes** | ☐ No - A loud rumbling sound accompanied the shaking?

☐ Yes | ☒ **No** - A number of sleepers woke up?

Note:

## 3

☐ Yes | ☒ **No** - The tremor was perceived by people outdoors?

☒ **Yes** | ☐ No - Inside the houses, everyone was aware of it due to the shaking of the whole construction?

☒ **Yes** | ☐ No - It was as if a heavy vehicle, thrown at full speed, had bumped into the house or a heavy object had overturned in one of the rooms.

☒ **Yes** | ☐ No - We swayed with the chairs, beds, etc...

☒ **Yes** | ☐ No - Freely suspended objects swayed?

☐ Yes | ☒ **No** - Light objects have been moved?

☐ Yes | ☒ **No** - Objects placed on top of furniture have fallen down?

☒ **Yes** | ☐ No - Doors and windows knocked?

☐ Yes | ☒ **No** - Windows broke?

☐ Yes | ☒ **No** - All the sleepers woke up?

☒ **Yes** | ☐ No - A few frightened people came out of the houses?

Remark:

## 4

☐ Yes | ☒ **No** - Frames have fallen off the walls?

☐ Yes | ☒ **No** - Dishes have broken?

☐ Yes | ☒ **No** - Furniture has been moved?

☐ Yes | ☒ **No** - Light furniture has been knocked over?

☐ Yes | ☒ **No** - Small fragments of plaster have fallen from ceilings and walls?

☐ Yes | ☒ **No** - Large numbers of people have left their homes in a hurry?

☐ Yes | ☒ **No** - Some people had the feeling that they were going to fall?

Remark:

## 5. In houses:

☐ Yes | ☒ **No** - Heavy pieces of furniture have been knocked over?

☐ Yes | ☒ **No** - Plastered ceiling have fallen down?

☐ Yes | ☒ **No** - Chimneys have collapsed?

☐ Yes | ☒ **No** - Walls were cracked?

☐ Yes | ☒ **No** - Landslides have occurred along the banks or embankments.

Remark:

Additional comments:

## Official inquiry for BOUGNIES (BE)

Location: 50.387°N 3.942°E, at 12.7 km from the epicentre.

**Imin: 3 - Imax: 3**

---

### 1

☐ Yes | ☒ **No** - A small number of inhabitants, especially those on the upper floors of the houses, noticed a tremor accompanied by a noise comparable to that produced by a heavy car-truck launched at full speed.

Remark:

☐ Yes | ☒ **No** - The trembling of movable objects?

### 2. A large number of people have observed

☐ Yes | ☒ **No** - The shock of glasses or crockery placed very close together?

☐ Yes | ☒ **No** - The shivering of windows and doors?

☐ Yes | ☒ **No** - The creaking of floors?

☐ Yes | ☒ **No** - The rustle of ceilings?

☐ Yes | ☒ **No** - A loud rumbling sound accompanied the shaking?

☐ Yes | ☒ **No** - A number of sleepers woke up?

Note:

### 3

☐ Yes | ☒ **No** - The tremor was perceived by people outdoors?

☒ **Yes** | ☐ No - Inside the houses, everyone was aware of it due to the shaking of the whole construction?

☒ **Yes** | ☐ No - It was as if a heavy vehicle, thrown at full speed, had bumped into the house or a heavy object had overturned in one of the rooms.

☐ Yes | ☒ **No** - We swayed with the chairs, beds, etc...

☐ Yes | ☒ **No** - Freely suspended objects swayed?

☐ Yes | ☒ **No** - Light objects have been moved?

☐ Yes | ☒ **No** - Objects placed on top of furniture have fallen down?

☐ Yes | ☒ **No** - Doors and windows knocked?

☐ Yes | ☒ **No** - Windows broke?

☐ Yes | ☒ **No** - All the sleepers woke up?

☐ Yes | ☒ **No** - A few frightened people came out of the houses?

Remark:

### 4

☐ Yes | ☒ **No** - Frames have fallen off the walls?

☐ Yes | ☒ **No** - Dishes have broken?

☐ Yes | ☒ **No** - Furniture has been moved?

☐ Yes | ☒ **No** - Light furniture has been knocked over?

☐ Yes | ☒ **No** - Small fragments of plaster have fallen from ceilings and walls?

☐ Yes | ☒ **No** - Large numbers of people have left their homes in a hurry?

☐ Yes | ☒ **No** - Some people had the feeling that they were going to fall?

Remark:

### 5. In houses:

☐ Yes | ☒ **No** - Heavy pieces of furniture have been knocked over?

☐ Yes | ☒ **No** - Plastered ceiling have fallen down?

☐ Yes | ☒ **No** - Chimneys have collapsed?

☐ Yes | ☒ **No** - Walls were cracked?

☐ Yes | ☒ **No** - Landslides have occurred along the banks or embankments.

Remark:

Additional comments:

## Official inquiry for BOUSSOIT (BE)

Location: 50.46°N 4.083°E, at 0.2 km from the epicentre.

**Imin: 7 - Imax: 7**

### 1

☐ Yes | ☒ **No** - A small number of inhabitants, especially those on the upper floors of the houses, noticed a tremor accompanied by a noise comparable to that produced by a heavy car-truck launched at full speed.

Remark:

☐ Yes | ☒ **No** - The trembling of movable objects?

### 2. A large number of people have observed

☐ Yes | ☒ **No** - The shock of glasses or crockery placed very close together?

☐ Yes | ☒ **No** - The shivering of windows and doors?

☐ Yes | ☒ **No** - The creaking of floors?

☐ Yes | ☒ **No** - The rustle of ceilings?

☐ Yes | ☒ **No** - A loud rumbling sound accompanied the shaking?

☐ Yes | ☒ **No** - A number of sleepers woke up?

Note:

### 3

☒ **Yes** | ☐ No - The tremor was perceived by people outdoors?

☒ **Yes** | ☐ No - Inside the houses, everyone was aware of it due to the shaking of the whole construction?

☒ **Yes** | ☐ No - It was as if a heavy vehicle, thrown at full speed, had bumped into the house or a heavy object had overturned in one of the rooms.

☒ **Yes** | ☐ No - We swayed with the chairs, beds, etc...

☒ **Yes** | ☐ No - Freely suspended objects swayed?

☒ **Yes** | ☐ No - Light objects have been moved?

☒ **Yes** | ☐ No - Objects placed on top of furniture have fallen down?

☒ **Yes** | ☐ No - Doors and windows knocked?

☒ **Yes** | ☐ No - Windows broke?

☒ **Yes** | ☐ No - All the sleepers woke up?

☒ **Yes** | ☐ No - A few frightened people came out of the houses?

Remark:

### 4

☒ **Yes** | ☐ No - Frames have fallen off the walls?

☒ **Yes** | ☐ No - Dishes have broken?

☒ **Yes** | ☐ No - Furniture has been moved?

☒ **Yes** | ☐ No - Light furniture has been knocked over?

☒ **Yes** | ☐ No - Small fragments of plaster have fallen from ceilings and walls?

☒ **Yes** | ☐ No - Large numbers of people have left their homes in a hurry?

☒ **Yes** | ☐ No - Some people had the feeling that they were going to fall?

Remark:

### 5. In houses:

☒ **Yes** | ☐ No - Heavy pieces of furniture have been knocked over?

☒ **Yes** | ☐ No - Plastered ceiling have fallen down?

☒ **Yes** | ☐ No - Chimneys have collapsed?

☒ **Yes** | ☐ No - Walls were cracked?

☒ **Yes** | ☐ No - Landslides have occurred along the banks or embankments.

Remark: **70à80% des cheminées se sont écroulées et des murs ont été lézardés**

Additional comments:

## Official inquiry for BRAINE-LE-COMTE (BE)

Location: 50.613°N 4.138°E, at 17.5 km from the epicentre.

**Imin: 3 - Imax: 3**

### 1

☒ **Yes** | ☐ **No** - A small number of inhabitants, especially those on the upper floors of the houses, noticed a tremor accompanied by a noise comparable to that produced by a heavy car-truck launched at full speed.

Remark:

☐ Yes | ☒ **No** - The trembling of movable objects?

### 2. A large number of people have observed

☐ Yes | ☒ **No** - The shock of glasses or crockery placed very close together?

☐ Yes | ☒ **No** - The shivering of windows and doors?

☐ Yes | ☒ **No** - The creaking of floors?

☐ Yes | ☒ **No** - The rustle of ceilings?

☐ Yes | ☒ **No** - A loud rumbling sound accompanied the shaking?

☐ Yes | ☒ **No** - A number of sleepers woke up?

Note:

### 3

☐ Yes | ☒ **No** - The tremor was perceived by people outdoors?

☐ Yes | ☒ **No** - Inside the houses, everyone was aware of it due to the shaking of the whole construction?

☐ Yes | ☒ **No** - It was as if a heavy vehicle, thrown at full speed, had bumped into the house or a heavy object had overturned in one of the rooms.

☐ Yes | ☒ **No** - We swayed with the chairs, beds, etc...

☐ Yes | ☒ **No** - Freely suspended objects swayed?

☐ Yes | ☒ **No** - Light objects have been moved?

☐ Yes | ☒ **No** - Objects placed on top of furniture have fallen down?

☐ Yes | ☒ **No** - Doors and windows knocked?

☐ Yes | ☒ **No** - Windows broke?

☐ Yes | ☒ **No** - All the sleepers woke up?

☐ Yes | ☒ **No** - A few frightened people came out of the houses?

Remark:

### 4

☐ Yes | ☒ **No** - Frames have fallen off the walls?

☐ Yes | ☒ **No** - Dishes have broken?

☐ Yes | ☒ **No** - Furniture has been moved?

☐ Yes | ☒ **No** - Light furniture has been knocked over?

☐ Yes | ☒ **No** - Small fragments of plaster have fallen from ceilings and walls?

☐ Yes | ☒ **No** - Large numbers of people have left their homes in a hurry?

☐ Yes | ☒ **No** - Some people had the feeling that they were going to fall?

Remark:

### 5. In houses:

☐ Yes | ☒ **No** - Heavy pieces of furniture have been knocked over?

☐ Yes | ☒ **No** - Plastered ceiling have fallen down?

☐ Yes | ☒ **No** - Chimneys have collapsed?

☐ Yes | ☒ **No** - Walls were cracked?

☐ Yes | ☒ **No** - Landslides have occurred along the banks or embankments.

Remark:

Additional comments:

## Official inquiry for BRAY (BE)

Location: 50.431°N 4.108°E, at 3.8 km from the epicentre.

**Imin: 6 - Imax: 6**

---

### 1

☐ Yes | ☒ **No** - A small number of inhabitants, especially those on the upper floors of the houses, noticed a tremor accompanied by a noise comparable to that produced by a heavy car-truck launched at full speed.

Remark:

☐ Yes | ☒ **No** - The trembling of movable objects?

### 2. A large number of people have observed

☐ Yes | ☒ **No** - The shock of glasses or crockery placed very close together?

☐ Yes | ☒ **No** - The shivering of windows and doors?

☐ Yes | ☒ **No** - The creaking of floors?

☐ Yes | ☒ **No** - The rustle of ceilings?

☐ Yes | ☒ **No** - A loud rumbling sound accompanied the shaking?

☐ Yes | ☒ **No** - A number of sleepers woke up?

Note:

### 3

☒ **Yes** | ☐ No - The tremor was perceived by people outdoors?

☒ **Yes** | ☐ No - Inside the houses, everyone was aware of it due to the shaking of the whole construction?

☒ **Yes** | ☐ No - It was as if a heavy vehicle, thrown at full speed, had bumped into the house or a heavy object had overturned in one of the rooms.

☒ **Yes** | ☐ No - We swayed with the chairs, beds, etc...

☒ **Yes** | ☐ No - Freely suspended objects swayed?

☒ **Yes** | ☐ No - Light objects have been moved?

☒ **Yes** | ☐ No - Objects placed on top of furniture have fallen down?

☒ **Yes** | ☐ No - Doors and windows knocked?

☒ **Yes** | ☐ No - Windows broke?

☒ **Yes** | ☐ No - All the sleepers woke up?

☒ **Yes** | ☐ No - A few frightened people came out of the houses?

Remark:

### 4

☒ **Yes** | ☐ No - Frames have fallen off the walls?

☒ **Yes** | ☐ No - Dishes have broken?

☒ **Yes** | ☐ No - Furniture has been moved?

☒ **Yes** | ☐ No - Light furniture has been knocked over?

☒ **Yes** | ☐ No - Small fragments of plaster have fallen from ceilings and walls?

☒ **Yes** | ☐ No - Large numbers of people have left their homes in a hurry?

☐ Yes | ☒ **No** - Some people had the feeling that they were going to fall?

Remark:

### 5. In houses:

☐ Yes | ☒ **No** - Heavy pieces of furniture have been knocked over?

☐ Yes | ☒ **No** - Plastered ceiling have fallen down?

☒ **Yes** | ☐ No - Chimneys have collapsed?

☒ **Yes** | ☐ No - Walls were cracked?

☐ Yes | ☒ **No** - Landslides have occurred along the banks or embankments.

Remark:

Additional comments:

## Official inquiry for BUVRINNES (BE)

Location: 50.389°N 4.211°E, at 12.2 km from the epicentre.

**Imin: 2 - Imax: 2**

### 1

☒ **Yes** | ☐ **No** - A small number of inhabitants, especially those on the upper floors of the houses, noticed a tremor accompanied by a noise comparable to that produced by a heavy car-truck launched at full speed.

Remark:

☐ Yes | ☒ **No** - The trembling of movable objects?

### 2. A large number of people have observed

☐ Yes | ☒ **No** - The shock of glasses or crockery placed very close together?

☐ Yes | ☒ **No** - The shivering of windows and doors?

☐ Yes | ☒ **No** - The creaking of floors?

☐ Yes | ☒ **No** - The rustle of ceilings?

☐ Yes | ☒ **No** - A loud rumbling sound accompanied the shaking?

☐ Yes | ☒ **No** - A number of sleepers woke up?

Note:

### 3

☐ Yes | ☒ **No** - The tremor was perceived by people outdoors?

☐ Yes | ☒ **No** - Inside the houses, everyone was aware of it due to the shaking of the whole construction?

☐ Yes | ☒ **No** - It was as if a heavy vehicle, thrown at full speed, had bumped into the house or a heavy object had overturned in one of the rooms.

☐ Yes | ☒ **No** - We swayed with the chairs, beds, etc...

☐ Yes | ☒ **No** - Freely suspended objects swayed?

☐ Yes | ☒ **No** - Light objects have been moved?

☐ Yes | ☒ **No** - Objects placed on top of furniture have fallen down?

☐ Yes | ☒ **No** - Doors and windows knocked?

☐ Yes | ☒ **No** - Windows broke?

☐ Yes | ☒ **No** - All the sleepers woke up?

☐ Yes | ☒ **No** - A few frightened people came out of the houses?

Remark:

### 4

☐ Yes | ☒ **No** - Frames have fallen off the walls?

☐ Yes | ☒ **No** - Dishes have broken?

☐ Yes | ☒ **No** - Furniture has been moved?

☐ Yes | ☒ **No** - Light furniture has been knocked over?

☐ Yes | ☒ **No** - Small fragments of plaster have fallen from ceilings and walls?

☐ Yes | ☒ **No** - Large numbers of people have left their homes in a hurry?

☐ Yes | ☒ **No** - Some people had the feeling that they were going to fall?

Remark:

### 5. In houses:

☐ Yes | ☒ **No** - Heavy pieces of furniture have been knocked over?

☐ Yes | ☒ **No** - Plastered ceiling have fallen down?

☐ Yes | ☒ **No** - Chimneys have collapsed?

☐ Yes | ☒ **No** - Walls were cracked?

☐ Yes | ☒ **No** - Landslides have occurred along the banks or embankments.

Remark:

Additional comments:

## Official inquiry for BUZET (BE)

Location: 50.537°N 4.367°E, at 22.1 km from the epicentre.

Imin: 3 - Imax: 3

### 1

☒ **Yes** | ☐ **No** - A small number of inhabitants, especially those on the upper floors of the houses, noticed a tremor accompanied by a noise comparable to that produced by a heavy car-truck launched at full speed.

Remark: **Un petit nombre d'habitants, particulièrement ceux qui se trouvaient aux étages supérieurs des maisons, ont remarqué uniquement un ébranlement**

☐ **Yes** | ☒ **No** - The trembling of movable objects?

### 2. A large number of people have observed

☐ **Yes** | ☒ **No** - The shock of glasses or crockery placed very close together?

☒ **Yes** | ☐ **No** - The shivering of windows and doors?

☐ **Yes** | ☒ **No** - The creaking of floors?

☐ **Yes** | ☒ **No** - The rustle of ceilings?

☐ **Yes** | ☒ **No** - A loud rumbling sound accompanied the shaking?

☐ **Yes** | ☒ **No** - A number of sleepers woke up?

Note:

### 3

☐ **Yes** | ☒ **No** - The tremor was perceived by people outdoors?

☐ **Yes** | ☒ **No** - Inside the houses, everyone was aware of it due to the shaking of the whole construction?

☐ **Yes** | ☒ **No** - It was as if a heavy vehicle, thrown at full speed, had bumped into the house or a heavy object had overturned in one of the rooms.

☐ **Yes** | ☒ **No** - We swayed with the chairs, beds, etc...

☐ **Yes** | ☒ **No** - Freely suspended objects swayed?

☐ **Yes** | ☒ **No** - Light objects have been moved?

☐ **Yes** | ☒ **No** - Objects placed on top of furniture have fallen down?

☐ **Yes** | ☒ **No** - Doors and windows knocked?

☐ **Yes** | ☒ **No** - Windows broke?

☐ **Yes** | ☒ **No** - All the sleepers woke up?

☐ **Yes** | ☒ **No** - A few frightened people came out of the houses?

Remark:

### 4

☐ **Yes** | ☒ **No** - Frames have fallen off the walls?

☐ **Yes** | ☒ **No** - Dishes have broken?

☐ **Yes** | ☒ **No** - Furniture has been moved?

☐ **Yes** | ☒ **No** - Light furniture has been knocked over?

☐ **Yes** | ☒ **No** - Small fragments of plaster have fallen from ceilings and walls?

☐ **Yes** | ☒ **No** - Large numbers of people have left their homes in a hurry?

☐ **Yes** | ☒ **No** - Some people had the feeling that they were going to fall?

Remark:

### 5. In houses:

☐ **Yes** | ☒ **No** - Heavy pieces of furniture have been knocked over?

☐ **Yes** | ☒ **No** - Plastered ceiling have fallen down?

☐ **Yes** | ☒ **No** - Chimneys have collapsed?

☐ **Yes** | ☒ **No** - Walls were cracked?

☐ **Yes** | ☒ **No** - Landslides have occurred along the banks or embankments.

Remark:

Additional comments:

## Official inquiry for CAMBRON-CASTEAU (BE)

Location: 50.589°N 3.88°E, at 20.2 km from the epicentre.

**Imin: 4 - Imax: 4**

---

### 1

☐ Yes | ☒ **No** - A small number of inhabitants, especially those on the upper floors of the houses, noticed a tremor accompanied by a noise comparable to that produced by a heavy car-truck launched at full speed.

Remark:

☐ Yes | ☒ **No** - The trembling of movable objects?

### 2. A large number of people have observed

☐ Yes | ☒ **No** - The shock of glasses or crockery placed very close together?

☐ Yes | ☒ **No** - The shivering of windows and doors?

☐ Yes | ☒ **No** - The creaking of floors?

☐ Yes | ☒ **No** - The rustle of ceilings?

☐ Yes | ☒ **No** - A loud rumbling sound accompanied the shaking?

☐ Yes | ☒ **No** - A number of sleepers woke up?

Note:

### 3

☐ Yes | ☒ **No** - The tremor was perceived by people outdoors?

☐ Yes | ☒ **No** - Inside the houses, everyone was aware of it due to the shaking of the whole construction?

☐ Yes | ☒ **No** - It was as if a heavy vehicle, thrown at full speed, had bumped into the house or a heavy object had overturned in one of the rooms.

☐ Yes | ☒ **No** - We swayed with the chairs, beds, etc...

☐ Yes | ☒ **No** - Freely suspended objects swayed?

☐ Yes | ☒ **No** - Light objects have been moved?

☐ Yes | ☒ **No** - Objects placed on top of furniture have fallen down?

☐ Yes | ☒ **No** - Doors and windows knocked?

☐ Yes | ☒ **No** - Windows broke?

☐ Yes | ☒ **No** - All the sleepers woke up?

☐ Yes | ☒ **No** - A few frightened people came out of the houses?

Remark:

### 4

☒ **Yes** | ☐ No - Frames have fallen off the walls?

☒ **Yes** | ☐ No - Dishes have broken?

☒ **Yes** | ☐ No - Furniture has been moved?

☒ **Yes** | ☐ No - Light furniture has been knocked over?

☒ **Yes** | ☐ No - Small fragments of plaster have fallen from ceilings and walls?

☒ **Yes** | ☐ No - Large numbers of people have left their homes in a hurry?

☒ **Yes** | ☐ No - Some people had the feeling that they were going to fall?

Remark:

### 5. In houses:

☒ **Yes** | ☐ No - Heavy pieces of furniture have been knocked over?

☒ **Yes** | ☐ No - Plastered ceiling have fallen down?

☒ **Yes** | ☐ No - Chimneys have collapsed?

☒ **Yes** | ☐ No - Walls were cracked?

☒ **Yes** | ☐ No - Landslides have occurred along the banks or embankments.

Remark:

Additional comments:

## Official inquiry for CARNIERES (BE)

Location: 50.442°N 4.256°E, at 12.7 km from the epicentre.

**Imin: 4 - Imax: 4**

### 1

☐ Yes | ☒ **No** - A small number of inhabitants, especially those on the upper floors of the houses, noticed a tremor accompanied by a noise comparable to that produced by a heavy car-truck launched at full speed.

Remark:

☒ **Yes** | ☐ No - The trembling of movable objects?

### 2. A large number of people have observed

☒ **Yes** | ☐ No - The shock of glasses or crockery placed very close together?

☒ **Yes** | ☐ No - The shivering of windows and doors?

☒ **Yes** | ☐ No - The creaking of floors?

☒ **Yes** | ☐ No - The rustle of ceilings?

☒ **Yes** | ☐ No - A loud rumbling sound accompanied the shaking?

☒ **Yes** | ☐ No - A number of sleepers woke up?

Note:

### 3

☐ Yes | ☒ **No** - The tremor was perceived by people outdoors?

☒ **Yes** | ☐ No - Inside the houses, everyone was aware of it due to the shaking of the whole construction?

☒ **Yes** | ☐ No - It was as if a heavy vehicle, thrown at full speed, had bumped into the house or a heavy object had overturned in one of the rooms.

☒ **Yes** | ☐ No - We swayed with the chairs, beds, etc...

☒ **Yes** | ☐ No - Freely suspended objects swayed?

☐ Yes | ☒ **No** - Light objects have been moved?

☐ Yes | ☒ **No** - Objects placed on top of furniture have fallen down?

☐ Yes | ☒ **No** - Doors and windows knocked?

☐ Yes | ☒ **No** - Windows broke?

☐ Yes | ☒ **No** - All the sleepers woke up?

☒ **Yes** | ☐ No - A few frightened people came out of the houses?

Remark:

### 4

☐ Yes | ☒ **No** - Frames have fallen off the walls?

☐ Yes | ☒ **No** - Dishes have broken?

☐ Yes | ☒ **No** - Furniture has been moved?

☐ Yes | ☒ **No** - Light furniture has been knocked over?

☐ Yes | ☒ **No** - Small fragments of plaster have fallen from ceilings and walls?

☒ **Yes** | ☐ No - Large numbers of people have left their homes in a hurry?

☒ **Yes** | ☐ No - Some people had the feeling that they were going to fall?

Remark:

### 5. In houses:

☐ Yes | ☒ **No** - Heavy pieces of furniture have been knocked over?

☐ Yes | ☒ **No** - Plastered ceiling have fallen down?

☐ Yes | ☒ **No** - Chimneys have collapsed?

☐ Yes | ☒ **No** - Walls were cracked?

☐ Yes | ☒ **No** - Landslides have occurred along the banks or embankments.

Remark:

Additional comments: **Certaines personnes ont perçu les tremblements comme suit: 1 seul vers 13H30 2 dont 1 vers 13H30 et l'autre un peu avant 14H00**

## Official inquiry for CASTEAU (BE)

Location: 50.513°N 4.016°E, at 7.4 km from the epicentre.

**Imin: 4 - Imax: 4**

### 1

☒ **Yes** | ☐ **No** - A small number of inhabitants, especially those on the upper floors of the houses, noticed a tremor accompanied by a noise comparable to that produced by a heavy car-truck launched at full speed.

Remark:

☐ Yes | ☒ **No** - The trembling of movable objects?

### 2. A large number of people have observed

☐ Yes | ☒ **No** - The shock of glasses or crockery placed very close together?

☒ **Yes** | ☐ **No** - The shivering of windows and doors?

☐ Yes | ☒ **No** - The creaking of floors?

☐ Yes | ☒ **No** - The rustle of ceilings?

☒ **Yes** | ☐ **No** - A loud rumbling sound accompanied the shaking?

☐ Yes | ☒ **No** - A number of sleepers woke up?

Note:

### 3

☐ Yes | ☒ **No** - The tremor was perceived by people outdoors?

☐ Yes | ☒ **No** - Inside the houses, everyone was aware of it due to the shaking of the whole construction?

☐ Yes | ☒ **No** - It was as if a heavy vehicle, thrown at full speed, had bumped into the house or a heavy object had overturned in one of the rooms.

☐ Yes | ☒ **No** - We swayed with the chairs, beds, etc...

☐ Yes | ☒ **No** - Freely suspended objects swayed?

☐ Yes | ☒ **No** - Light objects have been moved?

☐ Yes | ☒ **No** - Objects placed on top of furniture have fallen down?

☒ **Yes** | ☐ **No** - Doors and windows knocked?

☐ Yes | ☒ **No** - Windows broke?

☐ Yes | ☒ **No** - All the sleepers woke up?

☒ **Yes** | ☐ **No** - A few frightened people came out of the houses?

Remark:

### 4

☐ Yes | ☒ **No** - Frames have fallen off the walls?

☐ Yes | ☒ **No** - Dishes have broken?

☐ Yes | ☒ **No** - Furniture has been moved?

☐ Yes | ☒ **No** - Light furniture has been knocked over?

☐ Yes | ☒ **No** - Small fragments of plaster have fallen from ceilings and walls?

☐ Yes | ☒ **No** - Large numbers of people have left their homes in a hurry?

☐ Yes | ☒ **No** - Some people had the feeling that they were going to fall?

Remark:

### 5. In houses:

☐ Yes | ☒ **No** - Heavy pieces of furniture have been knocked over?

☐ Yes | ☒ **No** - Plastered ceiling have fallen down?

☐ Yes | ☒ **No** - Chimneys have collapsed?

☐ Yes | ☒ **No** - Walls were cracked?

☐ Yes | ☒ **No** - Landslides have occurred along the banks or embankments.

Remark:

Additional comments: **Beaucoup de personnes supposèrent à ce moment qu'il s'agissait du déplacement d'air provoqué par une explosion à distance ( bombe,mine, dépôt de munitions,etc)**

# Official inquiry for CHAPELLE-LEZ-HERLAIMONT (BE)

Location: 50.471°N 4.286°E, at 14.7 km from the epicentre.

**Imin: 4 - Imax: 4**

## 1

☒ **Yes** | ☐ **No** - A small number of inhabitants, especially those on the upper floors of the houses, noticed a tremor accompanied by a noise comparable to that produced by a heavy car-truck launched at full speed.

Remark:

☒ **Yes** | ☐ **No** - The trembling of movable objects?

## 2. A large number of people have observed

☐ **Yes** | ☒ **No** - The shock of glasses or crockery placed very close together?

☐ **Yes** | ☒ **No** - The shivering of windows and doors?

☐ **Yes** | ☒ **No** - The creaking of floors?

☐ **Yes** | ☒ **No** - The rustle of ceilings?

☐ **Yes** | ☒ **No** - A loud rumbling sound accompanied the shaking?

☐ **Yes** | ☒ **No** - A number of sleepers woke up?

Note:

## 3

☐ **Yes** | ☒ **No** - The tremor was perceived by people outdoors?

☐ **Yes** | ☒ **No** - Inside the houses, everyone was aware of it due to the shaking of the whole construction?

☐ **Yes** | ☒ **No** - It was as if a heavy vehicle, thrown at full speed, had bumped into the house or a heavy object had overturned in one of the rooms.

☐ **Yes** | ☒ **No** - We swayed with the chairs, beds, etc...

☐ **Yes** | ☒ **No** - Freely suspended objects swayed?

☐ **Yes** | ☒ **No** - Light objects have been moved?

☐ **Yes** | ☒ **No** - Objects placed on top of furniture have fallen down?

☐ **Yes** | ☒ **No** - Doors and windows knocked?

☐ **Yes** | ☒ **No** - Windows broke?

☐ **Yes** | ☒ **No** - All the sleepers woke up?

☐ **Yes** | ☒ **No** - A few frightened people came out of the houses?

Remark:

## 4

☐ **Yes** | ☒ **No** - Frames have fallen off the walls?

☐ **Yes** | ☒ **No** - Dishes have broken?

☐ **Yes** | ☒ **No** - Furniture has been moved?

☐ **Yes** | ☒ **No** - Light furniture has been knocked over?

☐ **Yes** | ☒ **No** - Small fragments of plaster have fallen from ceilings and walls?

☐ **Yes** | ☒ **No** - Large numbers of people have left their homes in a hurry?

☐ **Yes** | ☒ **No** - Some people had the feeling that they were going to fall?

Remark:

## 5. In houses:

☐ **Yes** | ☒ **No** - Heavy pieces of furniture have been knocked over?

☐ **Yes** | ☒ **No** - Plastered ceiling have fallen down?

☐ **Yes** | ☒ **No** - Chimneys have collapsed?

☐ **Yes** | ☒ **No** - Walls were cracked?

☐ **Yes** | ☒ **No** - Landslides have occurred along the banks or embankments.

Remark:

Additional comments:

## Official inquiry for CHARLEROI (BE)

Location: 50.415°N 4.431°E, at 25.4 km from the epicentre.

**Imin: 3 - Imax: 3**

### 1

☒ **Yes** | ☐ **No** - A small number of inhabitants, especially those on the upper floors of the houses, noticed a tremor accompanied by a noise comparable to that produced by a heavy car-truck launched at full speed.

Remark: **Un petit nombre d'habitants, ont remarqué un bruit comparables à celui que produit un auto-camion montant une rue en pente et changeant de vitesse.**

☒ **Yes** | ☐ **No** - The trembling of movable objects?

### 2. A large number of people have observed

☒ **Yes** | ☐ **No** - The shock of glasses or crockery placed very close together?

☐ **Yes** | ☒ **No** - The shivering of windows and doors?

☐ **Yes** | ☒ **No** - The creaking of floors?

☐ **Yes** | ☒ **No** - The rustle of ceilings?

☐ **Yes** | ☒ **No** - A loud rumbling sound accompanied the shaking?

☐ **Yes** | ☒ **No** - A number of sleepers woke up?

Note:

### 3

☐ **Yes** | ☒ **No** - The tremor was perceived by people outdoors?

☐ **Yes** | ☒ **No** - Inside the houses, everyone was aware of it due to the shaking of the whole construction?

☐ **Yes** | ☒ **No** - It was as if a heavy vehicle, thrown at full speed, had bumped into the house or a heavy object had overturned in one of the rooms.

☐ **Yes** | ☒ **No** - We swayed with the chairs, beds, etc...

☐ **Yes** | ☒ **No** - Freely suspended objects swayed?

☐ **Yes** | ☒ **No** - Light objects have been moved?

☐ **Yes** | ☒ **No** - Objects placed on top of furniture have fallen down?

☐ **Yes** | ☒ **No** - Doors and windows knocked?

☐ **Yes** | ☒ **No** - Windows broke?

☐ **Yes** | ☒ **No** - All the sleepers woke up?

☐ **Yes** | ☒ **No** - A few frightened people came out of the houses?

Remark:

### 4

☐ **Yes** | ☒ **No** - Frames have fallen off the walls?

☐ **Yes** | ☒ **No** - Dishes have broken?

☐ **Yes** | ☒ **No** - Furniture has been moved?

☐ **Yes** | ☒ **No** - Light furniture has been knocked over?

☐ **Yes** | ☒ **No** - Small fragments of plaster have fallen from ceilings and walls?

☐ **Yes** | ☒ **No** - Large numbers of people have left their homes in a hurry?

☐ **Yes** | ☒ **No** - Some people had the feeling that they were going to fall?

Remark:

### 5. In houses:

☐ **Yes** | ☒ **No** - Heavy pieces of furniture have been knocked over?

☐ **Yes** | ☒ **No** - Plastered ceiling have fallen down?

☐ **Yes** | ☒ **No** - Chimneys have collapsed?

☐ **Yes** | ☒ **No** - Walls were cracked?

☐ **Yes** | ☒ **No** - Landslides have occurred along the banks or embankments.

Remark:

Additional comments:

# Official inquiry for CHAUSSEE-NOTRE-DAME-LOUVIGNIES (BE)

Location: 50.513°N 4.016°E, at 7.4 km from the epicentre.

**Imin: 3 - Imax: 3**

## 1

☒ **Yes** | ☐ **No** - A small number of inhabitants, especially those on the upper floors of the houses, noticed a tremor accompanied by a noise comparable to that produced by a heavy car-truck launched at full speed.

Remark:

☐ Yes | ☒ **No** - The trembling of movable objects?

## 2. A large number of people have observed

☐ Yes | ☒ **No** - The shock of glasses or crockery placed very close together?

☐ Yes | ☒ **No** - The shivering of windows and doors?

☐ Yes | ☒ **No** - The creaking of floors?

☐ Yes | ☒ **No** - The rustle of ceilings?

☐ Yes | ☒ **No** - A loud rumbling sound accompanied the shaking?

☐ Yes | ☒ **No** - A number of sleepers woke up?

Note:

## 3

☐ Yes | ☒ **No** - The tremor was perceived by people outdoors?

☐ Yes | ☒ **No** - Inside the houses, everyone was aware of it due to the shaking of the whole construction?

☐ Yes | ☒ **No** - It was as if a heavy vehicle, thrown at full speed, had bumped into the house or a heavy object had overturned in one of the rooms.

☐ Yes | ☒ **No** - We swayed with the chairs, beds, etc...

☐ Yes | ☒ **No** - Freely suspended objects swayed?

☐ Yes | ☒ **No** - Light objects have been moved?

☐ Yes | ☒ **No** - Objects placed on top of furniture have fallen down?

☒ **Yes** | ☐ **No** - Doors and windows knocked?

☐ Yes | ☒ **No** - Windows broke?

☐ Yes | ☒ **No** - All the sleepers woke up?

☒ **Yes** | ☐ **No** - A few frightened people came out of the houses?

Remark:

## 4

☐ Yes | ☒ **No** - Frames have fallen off the walls?

☐ Yes | ☒ **No** - Dishes have broken?

☐ Yes | ☒ **No** - Furniture has been moved?

☐ Yes | ☒ **No** - Light furniture has been knocked over?

☐ Yes | ☒ **No** - Small fragments of plaster have fallen from ceilings and walls?

☐ Yes | ☒ **No** - Large numbers of people have left their homes in a hurry?

☐ Yes | ☒ **No** - Some people had the feeling that they were going to fall?

Remark:

## 5. In houses:

☐ Yes | ☒ **No** - Heavy pieces of furniture have been knocked over?

☐ Yes | ☒ **No** - Plastered ceiling have fallen down?

☐ Yes | ☒ **No** - Chimneys have collapsed?

☐ Yes | ☒ **No** - Walls were cracked?

☐ Yes | ☒ **No** - Landslides have occurred along the banks or embankments.

Remark:

Additional comments:

## Official inquiry for CIPLY (BE)

Location: 50.42°N 3.945°E, at 10.6 km from the epicentre.

**Imin: 4 - Imax: 5**

---

### 1

☐ Yes | ☒ **No** - A small number of inhabitants, especially those on the upper floors of the houses, noticed a tremor accompanied by a noise comparable to that produced by a heavy car-truck launched at full speed.

Remark:

☐ Yes | ☒ **No** - The trembling of movable objects?

### 2. A large number of people have observed

☐ Yes | ☒ **No** - The shock of glasses or crockery placed very close together?

☐ Yes | ☒ **No** - The shivering of windows and doors?

☐ Yes | ☒ **No** - The creaking of floors?

☐ Yes | ☒ **No** - The rustle of ceilings?

☐ Yes | ☒ **No** - A loud rumbling sound accompanied the shaking?

☐ Yes | ☒ **No** - A number of sleepers woke up?

Note:

### 3

☒ **Yes** | ☐ No - The tremor was perceived by people outdoors?

☒ **Yes** | ☐ No - Inside the houses, everyone was aware of it due to the shaking of the whole construction?

☒ **Yes** | ☐ No - It was as if a heavy vehicle, thrown at full speed, had bumped into the house or a heavy object had overturned in one of the rooms.

☒ **Yes** | ☐ No - We swayed with the chairs, beds, etc...

☒ **Yes** | ☐ No - Freely suspended objects swayed?

☒ **Yes** | ☐ No - Light objects have been moved?

☒ **Yes** | ☐ No - Objects placed on top of furniture have fallen down?

☒ **Yes** | ☐ No - Doors and windows knocked?

☒ **Yes** | ☐ No - Windows broke?

☒ **Yes** | ☐ No - All the sleepers woke up?

☒ **Yes** | ☐ No - A few frightened people came out of the houses?

Remark:

### 4

☐ Yes | ☒ **No** - Frames have fallen off the walls?

☐ Yes | ☒ **No** - Dishes have broken?

☐ Yes | ☒ **No** - Furniture has been moved?

☐ Yes | ☒ **No** - Light furniture has been knocked over?

☐ Yes | ☒ **No** - Small fragments of plaster have fallen from ceilings and walls?

☐ Yes | ☒ **No** - Large numbers of people have left their homes in a hurry?

☐ Yes | ☒ **No** - Some people had the feeling that they were going to fall?

Remark:

### 5. In houses:

☐ Yes | ☒ **No** - Heavy pieces of furniture have been knocked over?

☐ Yes | ☒ **No** - Plastered ceiling have fallen down?

☐ Yes | ☒ **No** - Chimneys have collapsed?

☐ Yes | ☒ **No** - Walls were cracked?

☐ Yes | ☒ **No** - Landslides have occurred along the banks or embankments.

Remark:

Additional comments:

## Official inquiry for CROIX-LEZ-ROUVEROY (BE)

Location: 50.361°N 4.076°E, at 11.0 km from the epicentre.

**Imin: 4 - Imax: 5**

**1**

☐ Yes | ☒ **No** - A small number of inhabitants, especially those on the upper floors of the houses, noticed a tremor accompanied by a noise comparable to that produced by a heavy car-truck launched at full speed.

Remark:

☐ Yes | ☒ **No** - The trembling of movable objects?

### **2. A large number of people have observed**

☐ Yes | ☒ **No** - The shock of glasses or crockery placed very close together?

☐ Yes | ☒ **No** - The shivering of windows and doors?

☐ Yes | ☒ **No** - The creaking of floors?

☐ Yes | ☒ **No** - The rustle of ceilings?

☐ Yes | ☒ **No** - A loud rumbling sound accompanied the shaking?

☐ Yes | ☒ **No** - A number of sleepers woke up?

Note:

**3**

☒ **Yes** | ☐ No - The tremor was perceived by people outdoors?

☒ **Yes** | ☐ No - Inside the houses, everyone was aware of it due to the shaking of the whole construction?

☐ Yes | ☒ **No** - It was as if a heavy vehicle, thrown at full speed, had bumped into the house or a heavy object had overturned in one of the rooms.

☒ **Yes** | ☐ No - We swayed with the chairs, beds, etc...

☒ **Yes** | ☐ No - Freely suspended objects swayed?

☐ Yes | ☒ **No** - Light objects have been moved?

☐ Yes | ☒ **No** - Objects placed on top of furniture have fallen down?

☒ **Yes** | ☐ No - Doors and windows knocked?

☐ Yes | ☒ **No** - Windows broke?

☒ **Yes** | ☐ No - All the sleepers woke up?

☒ **Yes** | ☐ No - A few frightened people came out of the houses?

Remark: **On a eu l'impression qu'un orage était pas loin. Certaines personnes dont le bourgmestre attendait une troisième secousse.**

**4**

☐ Yes | ☒ **No** - Frames have fallen off the walls?

☐ Yes | ☒ **No** - Dishes have broken?

☐ Yes | ☒ **No** - Furniture has been moved?

☐ Yes | ☒ **No** - Light furniture has been knocked over?

☐ Yes | ☒ **No** - Small fragments of plaster have fallen from ceilings and walls?

☐ Yes | ☒ **No** - Large numbers of people have left their homes in a hurry?

☐ Yes | ☒ **No** - Some people had the feeling that they were going to fall?

Remark:

### **5. In houses:**

☐ Yes | ☒ **No** - Heavy pieces of furniture have been knocked over?

☐ Yes | ☒ **No** - Plastered ceiling have fallen down?

☐ Yes | ☒ **No** - Chimneys have collapsed?

☐ Yes | ☒ **No** - Walls were cracked?

☐ Yes | ☒ **No** - Landslides have occurred along the banks or embankments.

Remark:

Additional comments: **le petit village limitrophe français Villers-Sire-Nicole a aussi ressenti la secousse**

# Official inquiry for ECAUSSINNES-D'ENGHIEN (BE)

Location: 50.572°N 4.178°E, at 14.2 km from the epicentre.

**Imin: 3 - Imax: 3**

## 1

☒ **Yes** | ☐ **No** - A small number of inhabitants, especially those on the upper floors of the houses, noticed a tremor accompanied by a noise comparable to that produced by a heavy car-truck launched at full speed.

Remark:

☐ Yes | ☒ **No** - The trembling of movable objects?

## 2. A large number of people have observed

☐ Yes | ☒ **No** - The shock of glasses or crockery placed very close together?

☐ Yes | ☒ **No** - The shivering of windows and doors?

☐ Yes | ☒ **No** - The creaking of floors?

☐ Yes | ☒ **No** - The rustle of ceilings?

☐ Yes | ☒ **No** - A loud rumbling sound accompanied the shaking?

☐ Yes | ☒ **No** - A number of sleepers woke up?

Note:

## 3

☐ Yes | ☒ **No** - The tremor was perceived by people outdoors?

☐ Yes | ☒ **No** - Inside the houses, everyone was aware of it due to the shaking of the whole construction?

☐ Yes | ☒ **No** - It was as if a heavy vehicle, thrown at full speed, had bumped into the house or a heavy object had overturned in one of the rooms.

☐ Yes | ☒ **No** - We swayed with the chairs, beds, etc...

☐ Yes | ☒ **No** - Freely suspended objects swayed?

☐ Yes | ☒ **No** - Light objects have been moved?

☐ Yes | ☒ **No** - Objects placed on top of furniture have fallen down?

☐ Yes | ☒ **No** - Doors and windows knocked?

☐ Yes | ☒ **No** - Windows broke?

☐ Yes | ☒ **No** - All the sleepers woke up?

☐ Yes | ☒ **No** - A few frightened people came out of the houses?

Remark:

## 4

☐ Yes | ☒ **No** - Frames have fallen off the walls?

☐ Yes | ☒ **No** - Dishes have broken?

☐ Yes | ☒ **No** - Furniture has been moved?

☐ Yes | ☒ **No** - Light furniture has been knocked over?

☐ Yes | ☒ **No** - Small fragments of plaster have fallen from ceilings and walls?

☐ Yes | ☒ **No** - Large numbers of people have left their homes in a hurry?

☐ Yes | ☒ **No** - Some people had the feeling that they were going to fall?

Remark:

## 5. In houses:

☐ Yes | ☒ **No** - Heavy pieces of furniture have been knocked over?

☐ Yes | ☒ **No** - Plastered ceiling have fallen down?

☐ Yes | ☒ **No** - Chimneys have collapsed?

☐ Yes | ☒ **No** - Walls were cracked?

☐ Yes | ☒ **No** - Landslides have occurred along the banks or embankments.

Remark:

Additional comments:

## Official inquiry for ECAUSSINNES-LALAING (BE)

Location: 50.571°N 4.182°E, at 14.3 km from the epicentre.

**Imin: 3 - Imax: 3**

### 1

☒ **Yes** | ☐ No - A small number of inhabitants, especially those on the upper floors of the houses, noticed a tremor accompanied by a noise comparable to that produced by a heavy car-truck launched at full speed.

Remark:

☒ **Yes** | ☐ No - The trembling of movable objects?

### 2. A large number of people have observed

☒ **Yes** | ☐ No - The shock of glasses or crockery placed very close together?

☒ **Yes** | ☐ No - The shivering of windows and doors?

☐ Yes | ☒ **No** - The creaking of floors?

☐ Yes | ☒ **No** - The rustle of ceilings?

☒ **Yes** | ☐ No - A loud rumbling sound accompanied the shaking?

☒ **Yes** | ☐ No - A number of sleepers woke up?

Note:

### 3

☐ Yes | ☒ **No** - The tremor was perceived by people outdoors?

☐ Yes | ☒ **No** - Inside the houses, everyone was aware of it due to the shaking of the whole construction?

☐ Yes | ☒ **No** - It was as if a heavy vehicle, thrown at full speed, had bumped into the house or a heavy object had overturned in one of the rooms.

☐ Yes | ☒ **No** - We swayed with the chairs, beds, etc...

☐ Yes | ☒ **No** - Freely suspended objects swayed?

☐ Yes | ☒ **No** - Light objects have been moved?

☐ Yes | ☒ **No** - Objects placed on top of furniture have fallen down?

☐ Yes | ☒ **No** - Doors and windows knocked?

☐ Yes | ☒ **No** - Windows broke?

☐ Yes | ☒ **No** - All the sleepers woke up?

☐ Yes | ☒ **No** - A few frightened people came out of the houses?

Remark:

### 4

☐ Yes | ☒ **No** - Frames have fallen off the walls?

☐ Yes | ☒ **No** - Dishes have broken?

☐ Yes | ☒ **No** - Furniture has been moved?

☐ Yes | ☒ **No** - Light furniture has been knocked over?

☐ Yes | ☒ **No** - Small fragments of plaster have fallen from ceilings and walls?

☐ Yes | ☒ **No** - Large numbers of people have left their homes in a hurry?

☐ Yes | ☒ **No** - Some people had the feeling that they were going to fall?

Remark:

### 5. In houses:

☐ Yes | ☒ **No** - Heavy pieces of furniture have been knocked over?

☐ Yes | ☒ **No** - Plastered ceiling have fallen down?

☐ Yes | ☒ **No** - Chimneys have collapsed?

☐ Yes | ☒ **No** - Walls were cracked?

☐ Yes | ☒ **No** - Landslides have occurred along the banks or embankments.

Remark:

Additional comments: **les tremblements n'ont été ressentis que par un très petit nombre de personnes et très faiblement.**

## Official inquiry for EPINOIS (BE)

Location: 50.403°N 4.206°E, at 10.9 km from the epicentre.

**Imin: 4 - Imax: 4**

---

### 1

☐ Yes | ☒ **No** - A small number of inhabitants, especially those on the upper floors of the houses, noticed a tremor accompanied by a noise comparable to that produced by a heavy car-truck launched at full speed.

Remark:

☒ **Yes** | ☐ No - The trembling of movable objects?

### 2. A large number of people have observed

☒ **Yes** | ☐ No - The shock of glasses or crockery placed very close together?

☒ **Yes** | ☐ No - The shivering of windows and doors?

☒ **Yes** | ☐ No - The creaking of floors?

☒ **Yes** | ☐ No - The rustle of ceilings?

☒ **Yes** | ☐ No - A loud rumbling sound accompanied the shaking?

☒ **Yes** | ☐ No - A number of sleepers woke up?

Note:

### 3

☐ Yes | ☒ **No** - The tremor was perceived by people outdoors?

☐ Yes | ☒ **No** - Inside the houses, everyone was aware of it due to the shaking of the whole construction?

☐ Yes | ☒ **No** - It was as if a heavy vehicle, thrown at full speed, had bumped into the house or a heavy object had overturned in one of the rooms.

☐ Yes | ☒ **No** - We swayed with the chairs, beds, etc...

☐ Yes | ☒ **No** - Freely suspended objects swayed?

☐ Yes | ☒ **No** - Light objects have been moved?

☐ Yes | ☒ **No** - Objects placed on top of furniture have fallen down?

☐ Yes | ☒ **No** - Doors and windows knocked?

☐ Yes | ☒ **No** - Windows broke?

☐ Yes | ☒ **No** - All the sleepers woke up?

☐ Yes | ☒ **No** - A few frightened people came out of the houses?

Remark:

### 4

☐ Yes | ☒ **No** - Frames have fallen off the walls?

☐ Yes | ☒ **No** - Dishes have broken?

☐ Yes | ☒ **No** - Furniture has been moved?

☐ Yes | ☒ **No** - Light furniture has been knocked over?

☐ Yes | ☒ **No** - Small fragments of plaster have fallen from ceilings and walls?

☐ Yes | ☒ **No** - Large numbers of people have left their homes in a hurry?

☐ Yes | ☒ **No** - Some people had the feeling that they were going to fall?

Remark:

### 5. In houses:

☐ Yes | ☒ **No** - Heavy pieces of furniture have been knocked over?

☐ Yes | ☒ **No** - Plastered ceiling have fallen down?

☐ Yes | ☒ **No** - Chimneys have collapsed?

☐ Yes | ☒ **No** - Walls were cracked?

☐ Yes | ☒ **No** - Landslides have occurred along the banks or embankments.

Remark:

Additional comments:

## Official inquiry for ERQUELINNES (BE)

Location: 50.31°N 4.131°E, at 17.0 km from the epicentre.

**Imin: 3 - Imax: 3**

### 1

☒ **Yes** | ☐ **No** - A small number of inhabitants, especially those on the upper floors of the houses, noticed a tremor accompanied by a noise comparable to that produced by a heavy car-truck launched at full speed.

Remark:

☐ Yes | ☒ **No** - The trembling of movable objects?

### 2. A large number of people have observed

☐ Yes | ☒ **No** - The shock of glasses or crockery placed very close together?

☐ Yes | ☒ **No** - The shivering of windows and doors?

☐ Yes | ☒ **No** - The creaking of floors?

☐ Yes | ☒ **No** - The rustle of ceilings?

☐ Yes | ☒ **No** - A loud rumbling sound accompanied the shaking?

☐ Yes | ☒ **No** - A number of sleepers woke up?

Note:

### 3

☐ Yes | ☒ **No** - The tremor was perceived by people outdoors?

☐ Yes | ☒ **No** - Inside the houses, everyone was aware of it due to the shaking of the whole construction?

☐ Yes | ☒ **No** - It was as if a heavy vehicle, thrown at full speed, had bumped into the house or a heavy object had overturned in one of the rooms.

☐ Yes | ☒ **No** - We swayed with the chairs, beds, etc...

☐ Yes | ☒ **No** - Freely suspended objects swayed?

☐ Yes | ☒ **No** - Light objects have been moved?

☐ Yes | ☒ **No** - Objects placed on top of furniture have fallen down?

☐ Yes | ☒ **No** - Doors and windows knocked?

☐ Yes | ☒ **No** - Windows broke?

☐ Yes | ☒ **No** - All the sleepers woke up?

☐ Yes | ☒ **No** - A few frightened people came out of the houses?

Remark:

### 4

☐ Yes | ☒ **No** - Frames have fallen off the walls?

☐ Yes | ☒ **No** - Dishes have broken?

☐ Yes | ☒ **No** - Furniture has been moved?

☐ Yes | ☒ **No** - Light furniture has been knocked over?

☐ Yes | ☒ **No** - Small fragments of plaster have fallen from ceilings and walls?

☐ Yes | ☒ **No** - Large numbers of people have left their homes in a hurry?

☐ Yes | ☒ **No** - Some people had the feeling that they were going to fall?

Remark:

### 5. In houses:

☐ Yes | ☒ **No** - Heavy pieces of furniture have been knocked over?

☐ Yes | ☒ **No** - Plastered ceiling have fallen down?

☐ Yes | ☒ **No** - Chimneys have collapsed?

☐ Yes | ☒ **No** - Walls were cracked?

☐ Yes | ☒ **No** - Landslides have occurred along the banks or embankments.

Remark:

Additional comments: **un étalage interieur d'un maroquinier s'est effondré.**

## Official inquiry for ESTINNES-AU-MONT (BE)

Location: 50.397°N 4.098°E, at 7.1 km from the epicentre.

**Imin: 5 - Imax: 6**

### 1

☐ Yes | ☒ **No** - A small number of inhabitants, especially those on the upper floors of the houses, noticed a tremor accompanied by a noise comparable to that produced by a heavy car-truck launched at full speed.

Remark:

☐ Yes | ☒ **No** - The trembling of movable objects?

### 2. A large number of people have observed

☐ Yes | ☒ **No** - The shock of glasses or crockery placed very close together?

☐ Yes | ☒ **No** - The shivering of windows and doors?

☐ Yes | ☒ **No** - The creaking of floors?

☐ Yes | ☒ **No** - The rustle of ceilings?

☐ Yes | ☒ **No** - A loud rumbling sound accompanied the shaking?

☐ Yes | ☒ **No** - A number of sleepers woke up?

Note:

### 3

☒ **Yes** | ☐ No - The tremor was perceived by people outdoors?

☒ **Yes** | ☐ No - Inside the houses, everyone was aware of it due to the shaking of the whole construction?

☒ **Yes** | ☐ No - It was as if a heavy vehicle, thrown at full speed, had bumped into the house or a heavy object had overturned in one of the rooms.

☒ **Yes** | ☐ No - We swayed with the chairs, beds, etc...

☒ **Yes** | ☐ No - Freely suspended objects swayed?

☒ **Yes** | ☐ No - Light objects have been moved?

☒ **Yes** | ☐ No - Objects placed on top of furniture have fallen down?

☒ **Yes** | ☐ No - Doors and windows knocked?

☒ **Yes** | ☐ No - Windows broke?

☒ **Yes** | ☐ No - All the sleepers woke up?

☒ **Yes** | ☐ No - A few frightened people came out of the houses?

Remark:

### 4

☐ Yes | ☒ **No** - Frames have fallen off the walls?

☐ Yes | ☒ **No** - Dishes have broken?

☐ Yes | ☒ **No** - Furniture has been moved?

☐ Yes | ☒ **No** - Light furniture has been knocked over?

☒ **Yes** | ☐ No - Small fragments of plaster have fallen from ceilings and walls?

☐ Yes | ☒ **No** - Large numbers of people have left their homes in a hurry?

☐ Yes | ☒ **No** - Some people had the feeling that they were going to fall?

Remark:

### 5. In houses:

☐ Yes | ☒ **No** - Heavy pieces of furniture have been knocked over?

☐ Yes | ☒ **No** - Plastered ceiling have fallen down?

☒ **Yes** | ☐ No - Chimneys have collapsed?

☐ Yes | ☒ **No** - Walls were cracked?

☐ Yes | ☒ **No** - Landslides have occurred along the banks or embankments.

Remark:

Additional comments:

## Official inquiry for ESTINNES-AU-VAL (BE)

Location: 50.412°N 4.106°E, at 5.7 km from the epicentre.

**Imin: 5 - Imax: 5**

---

### 1

☒ **Yes** | ☐ **No** - A small number of inhabitants, especially those on the upper floors of the houses, noticed a tremor accompanied by a noise comparable to that produced by a heavy car-truck launched at full speed.

Remark:

☐ **Yes** | ☒ **No** - The trembling of movable objects?

### 2. A large number of people have observed

☐ **Yes** | ☒ **No** - The shock of glasses or crockery placed very close together?

☐ **Yes** | ☒ **No** - The shivering of windows and doors?

☐ **Yes** | ☒ **No** - The creaking of floors?

☐ **Yes** | ☒ **No** - The rustle of ceilings?

☒ **Yes** | ☐ **No** - A loud rumbling sound accompanied the shaking?

☒ **Yes** | ☐ **No** - A number of sleepers woke up?

Note:

### 3

☒ **Yes** | ☐ **No** - The tremor was perceived by people outdoors?

☒ **Yes** | ☐ **No** - Inside the houses, everyone was aware of it due to the shaking of the whole construction?

☒ **Yes** | ☐ **No** - It was as if a heavy vehicle, thrown at full speed, had bumped into the house or a heavy object had overturned in one of the rooms.

☐ **Yes** | ☒ **No** - We swayed with the chairs, beds, etc...

☐ **Yes** | ☒ **No** - Freely suspended objects swayed?

☐ **Yes** | ☒ **No** - Light objects have been moved?

☐ **Yes** | ☒ **No** - Objects placed on top of furniture have fallen down?

☐ **Yes** | ☒ **No** - Doors and windows knocked?

☐ **Yes** | ☒ **No** - Windows broke?

☐ **Yes** | ☒ **No** - All the sleepers woke up?

☒ **Yes** | ☐ **No** - A few frightened people came out of the houses?

Remark:

### 4

☐ **Yes** | ☒ **No** - Frames have fallen off the walls?

☐ **Yes** | ☒ **No** - Dishes have broken?

☐ **Yes** | ☒ **No** - Furniture has been moved?

☐ **Yes** | ☒ **No** - Light furniture has been knocked over?

☒ **Yes** | ☐ **No** - Small fragments of plaster have fallen from ceilings and walls?

☐ **Yes** | ☒ **No** - Large numbers of people have left their homes in a hurry?

☐ **Yes** | ☒ **No** - Some people had the feeling that they were going to fall?

Remark:

### 5. In houses:

☐ **Yes** | ☒ **No** - Heavy pieces of furniture have been knocked over?

☐ **Yes** | ☒ **No** - Plastered ceiling have fallen down?

☐ **Yes** | ☒ **No** - Chimneys have collapsed?

☐ **Yes** | ☒ **No** - Walls were cracked?

☐ **Yes** | ☒ **No** - Landslides have occurred along the banks or embankments.

Remark:

Additional comments:

## Official inquiry for EUGIES (BE)

Location: 50.39°N 3.888°E, at 15.7 km from the epicentre.

**Imin: 3 - Imax: 3**

### 1

☒ **Yes** | ☐ **No** - A small number of inhabitants, especially those on the upper floors of the houses, noticed a tremor accompanied by a noise comparable to that produced by a heavy car-truck launched at full speed.

Remark:

☐ Yes | ☒ **No** - The trembling of movable objects?

### 2. A large number of people have observed

☐ Yes | ☒ **No** - The shock of glasses or crockery placed very close together?

☐ Yes | ☒ **No** - The shivering of windows and doors?

☐ Yes | ☒ **No** - The creaking of floors?

☐ Yes | ☒ **No** - The rustle of ceilings?

☐ Yes | ☒ **No** - A loud rumbling sound accompanied the shaking?

☐ Yes | ☒ **No** - A number of sleepers woke up?

Note:

### 3

☐ Yes | ☒ **No** - The tremor was perceived by people outdoors?

☐ Yes | ☒ **No** - Inside the houses, everyone was aware of it due to the shaking of the whole construction?

☐ Yes | ☒ **No** - It was as if a heavy vehicle, thrown at full speed, had bumped into the house or a heavy object had overturned in one of the rooms.

☐ Yes | ☒ **No** - We swayed with the chairs, beds, etc...

☐ Yes | ☒ **No** - Freely suspended objects swayed?

☐ Yes | ☒ **No** - Light objects have been moved?

☐ Yes | ☒ **No** - Objects placed on top of furniture have fallen down?

☐ Yes | ☒ **No** - Doors and windows knocked?

☐ Yes | ☒ **No** - Windows broke?

☐ Yes | ☒ **No** - All the sleepers woke up?

☐ Yes | ☒ **No** - A few frightened people came out of the houses?

Remark:

### 4

☐ Yes | ☒ **No** - Frames have fallen off the walls?

☐ Yes | ☒ **No** - Dishes have broken?

☐ Yes | ☒ **No** - Furniture has been moved?

☐ Yes | ☒ **No** - Light furniture has been knocked over?

☐ Yes | ☒ **No** - Small fragments of plaster have fallen from ceilings and walls?

☐ Yes | ☒ **No** - Large numbers of people have left their homes in a hurry?

☐ Yes | ☒ **No** - Some people had the feeling that they were going to fall?

Remark:

### 5. In houses:

☐ Yes | ☒ **No** - Heavy pieces of furniture have been knocked over?

☐ Yes | ☒ **No** - Plastered ceiling have fallen down?

☐ Yes | ☒ **No** - Chimneys have collapsed?

☐ Yes | ☒ **No** - Walls were cracked?

☐ Yes | ☒ **No** - Landslides have occurred along the banks or embankments.

Remark:

Additional comments:

# Official inquiry for FAMILLEUREUX (BE)

Location: 50.522°N 4.212°E, at 11.6 km from the epicentre.

**Imin: 4 - Imax: 4**

## 1

☒ **Yes** | ☐ **No** - A small number of inhabitants, especially those on the upper floors of the houses, noticed a tremor accompanied by a noise comparable to that produced by a heavy car-truck launched at full speed.

Remark:

☐ Yes | ☒ **No** - The trembling of movable objects?

## 2. A large number of people have observed

☐ Yes | ☒ **No** - The shock of glasses or crockery placed very close together?

☐ Yes | ☒ **No** - The shivering of windows and doors?

☐ Yes | ☒ **No** - The creaking of floors?

☐ Yes | ☒ **No** - The rustle of ceilings?

☐ Yes | ☒ **No** - A loud rumbling sound accompanied the shaking?

☐ Yes | ☒ **No** - A number of sleepers woke up?

Note:

## 3

☐ Yes | ☒ **No** - The tremor was perceived by people outdoors?

☒ **Yes** | ☐ **No** - Inside the houses, everyone was aware of it due to the shaking of the whole construction?

☒ **Yes** | ☐ **No** - It was as if a heavy vehicle, thrown at full speed, had bumped into the house or a heavy object had overturned in one of the rooms.

☐ Yes | ☒ **No** - We swayed with the chairs, beds, etc...

☐ Yes | ☒ **No** - Freely suspended objects swayed?

☐ Yes | ☒ **No** - Light objects have been moved?

☐ Yes | ☒ **No** - Objects placed on top of furniture have fallen down?

☐ Yes | ☒ **No** - Doors and windows knocked?

☐ Yes | ☒ **No** - Windows broke?

☐ Yes | ☒ **No** - All the sleepers woke up?

☐ Yes | ☒ **No** - A few frightened people came out of the houses?

Remark:

## 4

☐ Yes | ☒ **No** - Frames have fallen off the walls?

☐ Yes | ☒ **No** - Dishes have broken?

☐ Yes | ☒ **No** - Furniture has been moved?

☐ Yes | ☒ **No** - Light furniture has been knocked over?

☐ Yes | ☒ **No** - Small fragments of plaster have fallen from ceilings and walls?

☐ Yes | ☒ **No** - Large numbers of people have left their homes in a hurry?

☐ Yes | ☒ **No** - Some people had the feeling that they were going to fall?

Remark:

## 5. In houses:

☐ Yes | ☒ **No** - Heavy pieces of furniture have been knocked over?

☐ Yes | ☒ **No** - Plastered ceiling have fallen down?

☐ Yes | ☒ **No** - Chimneys have collapsed?

☐ Yes | ☒ **No** - Walls were cracked?

☐ Yes | ☒ **No** - Landslides have occurred along the banks or embankments.

Remark:

Additional comments:

## Official inquiry for FAUROEULX (BE)

Location: 50.37°N 4.111°E, at 10.3 km from the epicentre.

**Imin: 4 - Imax: 4**

### 1

☒ **Yes** | ☐ No - A small number of inhabitants, especially those on the upper floors of the houses, noticed a tremor accompanied by a noise comparable to that produced by a heavy car-truck launched at full speed.

Remark:

☒ **Yes** | ☐ No - The trembling of movable objects?

### 2. A large number of people have observed

☒ **Yes** | ☐ No - The shock of glasses or crockery placed very close together?

☒ **Yes** | ☐ No - The shivering of windows and doors?

☒ **Yes** | ☐ No - The creaking of floors?

☐ Yes | ☒ **No** - The rustle of ceilings?

☐ Yes | ☒ **No** - A loud rumbling sound accompanied the shaking?

☐ Yes | ☒ **No** - A number of sleepers woke up?

Note:

### 3

☐ Yes | ☒ **No** - The tremor was perceived by people outdoors?

☐ Yes | ☒ **No** - Inside the houses, everyone was aware of it due to the shaking of the whole construction?

☒ **Yes** | ☐ No - It was as if a heavy vehicle, thrown at full speed, had bumped into the house or a heavy object had overturned in one of the rooms.

☒ **Yes** | ☐ No - We swayed with the chairs, beds, etc...

☐ Yes | ☒ **No** - Freely suspended objects swayed?

☐ Yes | ☒ **No** - Light objects have been moved?

☐ Yes | ☒ **No** - Objects placed on top of furniture have fallen down?

☐ Yes | ☒ **No** - Doors and windows knocked?

☐ Yes | ☒ **No** - Windows broke?

☐ Yes | ☒ **No** - All the sleepers woke up?

☐ Yes | ☒ **No** - A few frightened people came out of the houses?

Remark:

### 4

☐ Yes | ☒ **No** - Frames have fallen off the walls?

☐ Yes | ☒ **No** - Dishes have broken?

☐ Yes | ☒ **No** - Furniture has been moved?

☐ Yes | ☒ **No** - Light furniture has been knocked over?

☐ Yes | ☒ **No** - Small fragments of plaster have fallen from ceilings and walls?

☐ Yes | ☒ **No** - Large numbers of people have left their homes in a hurry?

☐ Yes | ☒ **No** - Some people had the feeling that they were going to fall?

Remark:

### 5. In houses:

☐ Yes | ☒ **No** - Heavy pieces of furniture have been knocked over?

☐ Yes | ☒ **No** - Plastered ceiling have fallen down?

☐ Yes | ☒ **No** - Chimneys have collapsed?

☐ Yes | ☒ **No** - Walls were cracked?

☐ Yes | ☒ **No** - Landslides have occurred along the banks or embankments.

Remark:

Additional comments:

## Official inquiry for FAYT-LEZ-MANAGE (BE)

Location: 50.491°N 4.228°E, at 11.1 km from the epicentre.

**Imin: 4 - Imax: 4**

---

**1**

☒ **Yes** | ☐ No - A small number of inhabitants, especially those on the upper floors of the houses, noticed a tremor accompanied by a noise comparable to that produced by a heavy car-truck launched at full speed.

Remark:

☒ **Yes** | ☐ No - The trembling of movable objects?

**2. A large number of people have observed**

☒ **Yes** | ☐ No - The shock of glasses or crockery placed very close together?

☒ **Yes** | ☐ No - The shivering of windows and doors?

☒ **Yes** | ☐ No - The creaking of floors?

☒ **Yes** | ☐ No - The rustle of ceilings?

☒ **Yes** | ☐ No - A loud rumbling sound accompanied the shaking?

☒ **Yes** | ☐ No - A number of sleepers woke up?

Note:

**3**

☒ **Yes** | ☐ No - The tremor was perceived by people outdoors?

☒ **Yes** | ☐ No - Inside the houses, everyone was aware of it due to the shaking of the whole construction?

☒ **Yes** | ☐ No - It was as if a heavy vehicle, thrown at full speed, had bumped into the house or a heavy object had overturned in one of the rooms.

☒ **Yes** | ☐ No - We swayed with the chairs, beds, etc...

☒ **Yes** | ☐ No - Freely suspended objects swayed?

☒ **Yes** | ☐ No - Light objects have been moved?

☒ **Yes** | ☐ No - Objects placed on top of furniture have fallen down?

☒ **Yes** | ☐ No - Doors and windows knocked?

☐ Yes | ☒ **No** - Windows broke?

☒ **Yes** | ☐ No - All the sleepers woke up?

☒ **Yes** | ☐ No - A few frightened people came out of the houses?

Remark:

**4**

☒ **Yes** | ☐ No - Frames have fallen off the walls?

☒ **Yes** | ☐ No - Dishes have broken?

☒ **Yes** | ☐ No - Furniture has been moved?

☒ **Yes** | ☐ No - Light furniture has been knocked over?

☒ **Yes** | ☐ No - Small fragments of plaster have fallen from ceilings and walls?

☒ **Yes** | ☐ No - Large numbers of people have left their homes in a hurry?

☒ **Yes** | ☐ No - Some people had the feeling that they were going to fall?

Remark:

**5. In houses:**

☐ Yes | ☒ **No** - Heavy pieces of furniture have been knocked over?

☐ Yes | ☒ **No** - Plastered ceiling have fallen down?

☐ Yes | ☒ **No** - Chimneys have collapsed?

☐ Yes | ☒ **No** - Walls were cracked?

☐ Yes | ☒ **No** - Landslides have occurred along the banks or embankments.

Remark:

Additional comments:

## Official inquiry for FELUY (BE)

Location: 50.563°N 4.252°E, at 16.7 km from the epicentre.

**Imin: 4 - Imax: 4**

### 1

☒ **Yes** | ☐ No - A small number of inhabitants, especially those on the upper floors of the houses, noticed a tremor accompanied by a noise comparable to that produced by a heavy car-truck launched at full speed.

Remark:

☐ Yes | ☒ **No** - The trembling of movable objects?

### 2. A large number of people have observed

☒ **Yes** | ☐ No - The shock of glasses or crockery placed very close together?

☒ **Yes** | ☐ No - The shivering of windows and doors?

☐ Yes | ☒ **No** - The creaking of floors?

☐ Yes | ☒ **No** - The rustle of ceilings?

☐ Yes | ☒ **No** - A loud rumbling sound accompanied the shaking?

☒ **Yes** | ☐ No - A number of sleepers woke up?

Note:

### 3

☐ Yes | ☒ **No** - The tremor was perceived by people outdoors?

☐ Yes | ☒ **No** - Inside the houses, everyone was aware of it due to the shaking of the whole construction?

☐ Yes | ☒ **No** - It was as if a heavy vehicle, thrown at full speed, had bumped into the house or a heavy object had overturned in one of the rooms.

☐ Yes | ☒ **No** - We swayed with the chairs, beds, etc...

☐ Yes | ☒ **No** - Freely suspended objects swayed?

☒ **Yes** | ☐ No - Light objects have been moved?

☒ **Yes** | ☐ No - Objects placed on top of furniture have fallen down?

☐ Yes | ☒ **No** - Doors and windows knocked?

☐ Yes | ☒ **No** - Windows broke?

☐ Yes | ☒ **No** - All the sleepers woke up?

☒ **Yes** | ☐ No - A few frightened people came out of the houses?

Remark: *Quelques personnes effrayées sont sorties des habitations croyant a un accident de roulage*

### 4

☐ Yes | ☒ **No** - Frames have fallen off the walls?

☐ Yes | ☒ **No** - Dishes have broken?

☐ Yes | ☒ **No** - Furniture has been moved?

☐ Yes | ☒ **No** - Light furniture has been knocked over?

☐ Yes | ☒ **No** - Small fragments of plaster have fallen from ceilings and walls?

☐ Yes | ☒ **No** - Large numbers of people have left their homes in a hurry?

☐ Yes | ☒ **No** - Some people had the feeling that they were going to fall?

Remark:

### 5. In houses:

☐ Yes | ☒ **No** - Heavy pieces of furniture have been knocked over?

☐ Yes | ☒ **No** - Plastered ceiling have fallen down?

☐ Yes | ☒ **No** - Chimneys have collapsed?

☐ Yes | ☒ **No** - Walls were cracked?

☐ Yes | ☒ **No** - Landslides have occurred along the banks or embankments.

Remark:

Additional comments: *chez le marchand de tabac, les paquets de cigarettes sont tombés par terre*

## Official inquiry for FLENU (BE)

Location: 50.449°N 3.888°E, at 13.7 km from the epicentre.

**Imin: 4 - Imax: 5**

### 1

☐ Yes | ☒ **No** - A small number of inhabitants, especially those on the upper floors of the houses, noticed a tremor accompanied by a noise comparable to that produced by a heavy car-truck launched at full speed.

Remark:

☒ **Yes** | ☐ No - The trembling of movable objects?

### 2. A large number of people have observed

☐ Yes | ☒ **No** - The shock of glasses or crockery placed very close together?

☒ **Yes** | ☐ No - The shivering of windows and doors?

☐ Yes | ☒ **No** - The creaking of floors?

☐ Yes | ☒ **No** - The rustle of ceilings?

☒ **Yes** | ☐ No - A loud rumbling sound accompanied the shaking?

☐ Yes | ☒ **No** - A number of sleepers woke up?

Note:

### 3

☒ **Yes** | ☐ No - The tremor was perceived by people outdoors?

☒ **Yes** | ☐ No - Inside the houses, everyone was aware of it due to the shaking of the whole construction?

☐ Yes | ☒ **No** - It was as if a heavy vehicle, thrown at full speed, had bumped into the house or a heavy object had overturned in one of the rooms.

☒ **Yes** | ☐ No - We swayed with the chairs, beds, etc...

☐ Yes | ☒ **No** - Freely suspended objects swayed?

☐ Yes | ☒ **No** - Light objects have been moved?

☐ Yes | ☒ **No** - Objects placed on top of furniture have fallen down?

☒ **Yes** | ☐ No - Doors and windows knocked?

☐ Yes | ☒ **No** - Windows broke?

☐ Yes | ☒ **No** - All the sleepers woke up?

☒ **Yes** | ☐ No - A few frightened people came out of the houses?

Remark:

### 4

☐ Yes | ☒ **No** - Frames have fallen off the walls?

☐ Yes | ☒ **No** - Dishes have broken?

☐ Yes | ☒ **No** - Furniture has been moved?

☐ Yes | ☒ **No** - Light furniture has been knocked over?

☐ Yes | ☒ **No** - Small fragments of plaster have fallen from ceilings and walls?

☒ **Yes** | ☐ No - Large numbers of people have left their homes in a hurry?

☐ Yes | ☒ **No** - Some people had the feeling that they were going to fall?

Remark:

### 5. In houses:

☐ Yes | ☒ **No** - Heavy pieces of furniture have been knocked over?

☐ Yes | ☒ **No** - Plastered ceiling have fallen down?

☐ Yes | ☒ **No** - Chimneys have collapsed?

☐ Yes | ☒ **No** - Walls were cracked?

☐ Yes | ☒ **No** - Landslides have occurred along the banks or embankments.

Remark:

Additional comments: **Les secousses de 13H27 et de 13H33 ont été ressentie à Flenu. La première était accompagnée d'un grondement sourd semblable au tonnerre lointain. la secousse s'est prolongée après la cessation de ce bruit. La seconde secousse a été plus violente. Le bourgmestre affirme avoir quitté son siège et de s'être précipité dans le jardin croyant sa vie en danger mais la secousse avait déjà cessé entre temps. Aucun dégât a été recensé exépté le radiateur à gaz qui s'est éteint au moment de la secousse.**

## Official inquiry for FONTAINE-L'EVEQUE (BE)

Location: 50.412°N 4.322°E, at 18.0 km from the epicentre.

**Imin: 4 - Imax: 5**

---

**1**

☒ **Yes** | ☐ No - A small number of inhabitants, especially those on the upper floors of the houses, noticed a tremor accompanied by a noise comparable to that produced by a heavy car-truck launched at full speed.

Remark:

☒ **Yes** | ☐ No - The trembling of movable objects?

**2. A large number of people have observed**

☒ **Yes** | ☐ No - The shock of glasses or crockery placed very close together?

☒ **Yes** | ☐ No - The shivering of windows and doors?

☒ **Yes** | ☐ No - The creaking of floors?

☒ **Yes** | ☐ No - The rustle of ceilings?

☒ **Yes** | ☐ No - A loud rumbling sound accompanied the shaking?

☒ **Yes** | ☐ No - A number of sleepers woke up?

Note:

**3**

☒ **Yes** | ☐ No - The tremor was perceived by people outdoors?

☒ **Yes** | ☐ No - Inside the houses, everyone was aware of it due to the shaking of the whole construction?

☒ **Yes** | ☐ No - It was as if a heavy vehicle, thrown at full speed, had bumped into the house or a heavy object had overturned in one of the rooms.

☒ **Yes** | ☐ No - We swayed with the chairs, beds, etc...

☒ **Yes** | ☐ No - Freely suspended objects swayed?

☒ **Yes** | ☐ No - Light objects have been moved?

☒ **Yes** | ☐ No - Objects placed on top of furniture have fallen down?

☒ **Yes** | ☐ No - Doors and windows knocked?

☒ **Yes** | ☐ No - Windows broke?

☒ **Yes** | ☐ No - All the sleepers woke up?

☒ **Yes** | ☐ No - A few frightened people came out of the houses?

Remark:

**4**

☒ **Yes** | ☐ No - Frames have fallen off the walls?

☒ **Yes** | ☐ No - Dishes have broken?

☒ **Yes** | ☐ No - Furniture has been moved?

☒ **Yes** | ☐ No - Light furniture has been knocked over?

☒ **Yes** | ☐ No - Small fragments of plaster have fallen from ceilings and walls?

☒ **Yes** | ☐ No - Large numbers of people have left their homes in a hurry?

☒ **Yes** | ☐ No - Some people had the feeling that they were going to fall?

Remark:

**5. In houses:**

☐ Yes | ☒ **No** - Heavy pieces of furniture have been knocked over?

☐ Yes | ☒ **No** - Plastered ceiling have fallen down?

☐ Yes | ☒ **No** - Chimneys have collapsed?

☐ Yes | ☒ **No** - Walls were cracked?

☐ Yes | ☒ **No** - Landslides have occurred along the banks or embankments.

Remark:

Additional comments:

## Official inquiry for FORCHIES-LA-MARCHE (BE)

Location: 50.438°N 4.32°E, at 17.2 km from the epicentre.

**Imin: 3 - Imax: 3**

---

### 1

☒ **Yes** | ☐ **No** - A small number of inhabitants, especially those on the upper floors of the houses, noticed a tremor accompanied by a noise comparable to that produced by a heavy car-truck launched at full speed.

Remark:

☐ **Yes** | ☒ **No** - The trembling of movable objects?

### 2. A large number of people have observed

☐ **Yes** | ☒ **No** - The shock of glasses or crockery placed very close together?

☐ **Yes** | ☒ **No** - The shivering of windows and doors?

☐ **Yes** | ☒ **No** - The creaking of floors?

☐ **Yes** | ☒ **No** - The rustle of ceilings?

☐ **Yes** | ☒ **No** - A loud rumbling sound accompanied the shaking?

☐ **Yes** | ☒ **No** - A number of sleepers woke up?

Note:

### 3

☐ **Yes** | ☒ **No** - The tremor was perceived by people outdoors?

☐ **Yes** | ☒ **No** - Inside the houses, everyone was aware of it due to the shaking of the whole construction?

☐ **Yes** | ☒ **No** - It was as if a heavy vehicle, thrown at full speed, had bumped into the house or a heavy object had overturned in one of the rooms.

☐ **Yes** | ☒ **No** - We swayed with the chairs, beds, etc...

☐ **Yes** | ☒ **No** - Freely suspended objects swayed?

☐ **Yes** | ☒ **No** - Light objects have been moved?

☐ **Yes** | ☒ **No** - Objects placed on top of furniture have fallen down?

☐ **Yes** | ☒ **No** - Doors and windows knocked?

☐ **Yes** | ☒ **No** - Windows broke?

☐ **Yes** | ☒ **No** - All the sleepers woke up?

☐ **Yes** | ☒ **No** - A few frightened people came out of the houses?

Remark:

### 4

☐ **Yes** | ☒ **No** - Frames have fallen off the walls?

☐ **Yes** | ☒ **No** - Dishes have broken?

☐ **Yes** | ☒ **No** - Furniture has been moved?

☐ **Yes** | ☒ **No** - Light furniture has been knocked over?

☐ **Yes** | ☒ **No** - Small fragments of plaster have fallen from ceilings and walls?

☐ **Yes** | ☒ **No** - Large numbers of people have left their homes in a hurry?

☐ **Yes** | ☒ **No** - Some people had the feeling that they were going to fall?

Remark:

### 5. In houses:

☐ **Yes** | ☒ **No** - Heavy pieces of furniture have been knocked over?

☐ **Yes** | ☒ **No** - Plastered ceiling have fallen down?

☐ **Yes** | ☒ **No** - Chimneys have collapsed?

☐ **Yes** | ☒ **No** - Walls were cracked?

☐ **Yes** | ☒ **No** - Landslides have occurred along the banks or embankments.

Remark:

Additional comments:

## Official inquiry for FRAMERIES (BE)

Location: 50.411°N 3.894°E, at 14.3 km from the epicentre.

**Imin: 3 - Imax: 3**

### 1

☐ Yes | ☒ **No** - A small number of inhabitants, especially those on the upper floors of the houses, noticed a tremor accompanied by a noise comparable to that produced by a heavy car-truck launched at full speed.

Remark:

☒ **Yes** | ☐ No - The trembling of movable objects?

### 2. A large number of people have observed

☐ Yes | ☒ **No** - The shock of glasses or crockery placed very close together?

☐ Yes | ☒ **No** - The shivering of windows and doors?

☐ Yes | ☒ **No** - The creaking of floors?

☐ Yes | ☒ **No** - The rustle of ceilings?

☐ Yes | ☒ **No** - A loud rumbling sound accompanied the shaking?

☐ Yes | ☒ **No** - A number of sleepers woke up?

Note:

### 3

☐ Yes | ☒ **No** - The tremor was perceived by people outdoors?

☐ Yes | ☒ **No** - Inside the houses, everyone was aware of it due to the shaking of the whole construction?

☐ Yes | ☒ **No** - It was as if a heavy vehicle, thrown at full speed, had bumped into the house or a heavy object had overturned in one of the rooms.

☐ Yes | ☒ **No** - We swayed with the chairs, beds, etc...

☒ **Yes** | ☐ No - Freely suspended objects swayed?

☒ **Yes** | ☐ No - Light objects have been moved?

☐ Yes | ☒ **No** - Objects placed on top of furniture have fallen down?

☐ Yes | ☒ **No** - Doors and windows knocked?

☐ Yes | ☒ **No** - Windows broke?

☐ Yes | ☒ **No** - All the sleepers woke up?

☐ Yes | ☒ **No** - A few frightened people came out of the houses?

Remark:

### 4

☐ Yes | ☒ **No** - Frames have fallen off the walls?

☐ Yes | ☒ **No** - Dishes have broken?

☐ Yes | ☒ **No** - Furniture has been moved?

☐ Yes | ☒ **No** - Light furniture has been knocked over?

☐ Yes | ☒ **No** - Small fragments of plaster have fallen from ceilings and walls?

☐ Yes | ☒ **No** - Large numbers of people have left their homes in a hurry?

☐ Yes | ☒ **No** - Some people had the feeling that they were going to fall?

Remark:

### 5. In houses:

☐ Yes | ☒ **No** - Heavy pieces of furniture have been knocked over?

☐ Yes | ☒ **No** - Plastered ceiling have fallen down?

☐ Yes | ☒ **No** - Chimneys have collapsed?

☐ Yes | ☒ **No** - Walls were cracked?

☐ Yes | ☒ **No** - Landslides have occurred along the banks or embankments.

Remark:

Additional comments:

# Official inquiry for GHLIN (BE)

Location: 50.478°N 3.902°E, at 12.8 km from the epicentre.

**Imin: 4 - Imax: 4**

## 1

☒ **Yes** | ☐ **No** - A small number of inhabitants, especially those on the upper floors of the houses, noticed a tremor accompanied by a noise comparable to that produced by a heavy car-truck launched at full speed.

Remark:

☒ **Yes** | ☐ **No** - The trembling of movable objects?

## 2. A large number of people have observed

☒ **Yes** | ☐ **No** - The shock of glasses or crockery placed very close together?

☒ **Yes** | ☐ **No** - The shivering of windows and doors?

☒ **Yes** | ☐ **No** - The creaking of floors?

☒ **Yes** | ☐ **No** - The rustle of ceilings?

☒ **Yes** | ☐ **No** - A loud rumbling sound accompanied the shaking?

☒ **Yes** | ☐ **No** - A number of sleepers woke up?

Note:

## 3

☐ **Yes** | ☒ **No** - The tremor was perceived by people outdoors?

☐ **Yes** | ☒ **No** - Inside the houses, everyone was aware of it due to the shaking of the whole construction?

☐ **Yes** | ☒ **No** - It was as if a heavy vehicle, thrown at full speed, had bumped into the house or a heavy object had overturned in one of the rooms.

☐ **Yes** | ☒ **No** - We swayed with the chairs, beds, etc...

☐ **Yes** | ☒ **No** - Freely suspended objects swayed?

☐ **Yes** | ☒ **No** - Light objects have been moved?

☐ **Yes** | ☒ **No** - Objects placed on top of furniture have fallen down?

☐ **Yes** | ☒ **No** - Doors and windows knocked?

☐ **Yes** | ☒ **No** - Windows broke?

☐ **Yes** | ☒ **No** - All the sleepers woke up?

☐ **Yes** | ☒ **No** - A few frightened people came out of the houses?

Remark:

## 4

☐ **Yes** | ☒ **No** - Frames have fallen off the walls?

☐ **Yes** | ☒ **No** - Dishes have broken?

☐ **Yes** | ☒ **No** - Furniture has been moved?

☐ **Yes** | ☒ **No** - Light furniture has been knocked over?

☐ **Yes** | ☒ **No** - Small fragments of plaster have fallen from ceilings and walls?

☐ **Yes** | ☒ **No** - Large numbers of people have left their homes in a hurry?

☐ **Yes** | ☒ **No** - Some people had the feeling that they were going to fall?

Remark:

## 5. In houses:

☐ **Yes** | ☒ **No** - Heavy pieces of furniture have been knocked over?

☐ **Yes** | ☒ **No** - Plastered ceiling have fallen down?

☐ **Yes** | ☒ **No** - Chimneys have collapsed?

☐ **Yes** | ☒ **No** - Walls were cracked?

☐ **Yes** | ☒ **No** - Landslides have occurred along the banks or embankments.

Remark:

Additional comments:

# Official inquiry for GIBECQ (BE)

Location: 50.639°N 3.889°E, at 23.8 km from the epicentre.

**Imin: 2 - Imax: 2**

## 1

☒ **Yes** | ☐ **No** - A small number of inhabitants, especially those on the upper floors of the houses, noticed a tremor accompanied by a noise comparable to that produced by a heavy car-truck launched at full speed.

Remark:

☐ Yes | ☒ **No** - The trembling of movable objects?

## 2. A large number of people have observed

☐ Yes | ☒ **No** - The shock of glasses or crockery placed very close together?

☐ Yes | ☒ **No** - The shivering of windows and doors?

☐ Yes | ☒ **No** - The creaking of floors?

☐ Yes | ☒ **No** - The rustle of ceilings?

☐ Yes | ☒ **No** - A loud rumbling sound accompanied the shaking?

☐ Yes | ☒ **No** - A number of sleepers woke up?

Note:

## 3

☐ Yes | ☒ **No** - The tremor was perceived by people outdoors?

☐ Yes | ☒ **No** - Inside the houses, everyone was aware of it due to the shaking of the whole construction?

☐ Yes | ☒ **No** - It was as if a heavy vehicle, thrown at full speed, had bumped into the house or a heavy object had overturned in one of the rooms.

☐ Yes | ☒ **No** - We swayed with the chairs, beds, etc...

☐ Yes | ☒ **No** - Freely suspended objects swayed?

☐ Yes | ☒ **No** - Light objects have been moved?

☐ Yes | ☒ **No** - Objects placed on top of furniture have fallen down?

☐ Yes | ☒ **No** - Doors and windows knocked?

☐ Yes | ☒ **No** - Windows broke?

☐ Yes | ☒ **No** - All the sleepers woke up?

☐ Yes | ☒ **No** - A few frightened people came out of the houses?

Remark:

## 4

☐ Yes | ☒ **No** - Frames have fallen off the walls?

☐ Yes | ☒ **No** - Dishes have broken?

☐ Yes | ☒ **No** - Furniture has been moved?

☐ Yes | ☒ **No** - Light furniture has been knocked over?

☐ Yes | ☒ **No** - Small fragments of plaster have fallen from ceilings and walls?

☐ Yes | ☒ **No** - Large numbers of people have left their homes in a hurry?

☐ Yes | ☒ **No** - Some people had the feeling that they were going to fall?

Remark:

## 5. In houses:

☐ Yes | ☒ **No** - Heavy pieces of furniture have been knocked over?

☐ Yes | ☒ **No** - Plastered ceiling have fallen down?

☐ Yes | ☒ **No** - Chimneys have collapsed?

☐ Yes | ☒ **No** - Walls were cracked?

☐ Yes | ☒ **No** - Landslides have occurred along the banks or embankments.

Remark:

Additional comments:

## Official inquiry for GIVRY (BE)

Location: 50.38°N 4.03°E, at 9.6 km from the epicentre.

**Imin: 4 - Imax: 4**

### 1

☒ **Yes** | ☐ **No** - A small number of inhabitants, especially those on the upper floors of the houses, noticed a tremor accompanied by a noise comparable to that produced by a heavy car-truck launched at full speed.

Remark:

☒ **Yes** | ☐ **No** - The trembling of movable objects?

### 2. A large number of people have observed

☒ **Yes** | ☐ **No** - The shock of glasses or crockery placed very close together?

☒ **Yes** | ☐ **No** - The shivering of windows and doors?

☒ **Yes** | ☐ **No** - The creaking of floors?

☒ **Yes** | ☐ **No** - The rustle of ceilings?

☒ **Yes** | ☐ **No** - A loud rumbling sound accompanied the shaking?

☒ **Yes** | ☐ **No** - A number of sleepers woke up?

Note:

### 3

☐ **Yes** | ☒ **No** - The tremor was perceived by people outdoors?

☐ **Yes** | ☒ **No** - Inside the houses, everyone was aware of it due to the shaking of the whole construction?

☐ **Yes** | ☒ **No** - It was as if a heavy vehicle, thrown at full speed, had bumped into the house or a heavy object had overturned in one of the rooms.

☐ **Yes** | ☒ **No** - We swayed with the chairs, beds, etc...

☐ **Yes** | ☒ **No** - Freely suspended objects swayed?

☐ **Yes** | ☒ **No** - Light objects have been moved?

☐ **Yes** | ☒ **No** - Objects placed on top of furniture have fallen down?

☐ **Yes** | ☒ **No** - Doors and windows knocked?

☐ **Yes** | ☒ **No** - Windows broke?

☐ **Yes** | ☒ **No** - All the sleepers woke up?

☐ **Yes** | ☒ **No** - A few frightened people came out of the houses?

Remark: **secousse assez sensible, mais n'ayant rien occasionné de grave**

### 4

☐ **Yes** | ☒ **No** - Frames have fallen off the walls?

☐ **Yes** | ☒ **No** - Dishes have broken?

☐ **Yes** | ☒ **No** - Furniture has been moved?

☐ **Yes** | ☒ **No** - Light furniture has been knocked over?

☐ **Yes** | ☒ **No** - Small fragments of plaster have fallen from ceilings and walls?

☐ **Yes** | ☒ **No** - Large numbers of people have left their homes in a hurry?

☐ **Yes** | ☒ **No** - Some people had the feeling that they were going to fall?

Remark:

### 5. In houses:

☐ **Yes** | ☒ **No** - Heavy pieces of furniture have been knocked over?

☐ **Yes** | ☒ **No** - Plastered ceiling have fallen down?

☐ **Yes** | ☒ **No** - Chimneys have collapsed?

☐ **Yes** | ☒ **No** - Walls were cracked?

☐ **Yes** | ☒ **No** - Landslides have occurred along the banks or embankments.

Remark:

Additional comments:

# Official inquiry for GODARVILLE (BE)

Location: 50.495°N 4.287°E, at 15.2 km from the epicentre.

**Imin: 3 - Imax: 3**

## 1

☒ **Yes** | ☐ **No** - A small number of inhabitants, especially those on the upper floors of the houses, noticed a tremor accompanied by a noise comparable to that produced by a heavy car-truck launched at full speed.

Remark:

☐ **Yes** | ☒ **No** - The trembling of movable objects?

## 2. A large number of people have observed

☐ **Yes** | ☒ **No** - The shock of glasses or crockery placed very close together?

☐ **Yes** | ☒ **No** - The shivering of windows and doors?

☐ **Yes** | ☒ **No** - The creaking of floors?

☐ **Yes** | ☒ **No** - The rustle of ceilings?

☐ **Yes** | ☒ **No** - A loud rumbling sound accompanied the shaking?

☐ **Yes** | ☒ **No** - A number of sleepers woke up?

Note:

## 3

☒ **Yes** | ☐ **No** - The tremor was perceived by people outdoors?

☒ **Yes** | ☐ **No** - Inside the houses, everyone was aware of it due to the shaking of the whole construction?

☒ **Yes** | ☐ **No** - It was as if a heavy vehicle, thrown at full speed, had bumped into the house or a heavy object had overturned in one of the rooms.

☒ **Yes** | ☐ **No** - We swayed with the chairs, beds, etc...

☒ **Yes** | ☐ **No** - Freely suspended objects swayed?

☐ **Yes** | ☒ **No** - Light objects have been moved?

☐ **Yes** | ☒ **No** - Objects placed on top of furniture have fallen down?

☒ **Yes** | ☐ **No** - Doors and windows knocked?

☐ **Yes** | ☒ **No** - Windows broke?

☐ **Yes** | ☒ **No** - All the sleepers woke up?

☒ **Yes** | ☐ **No** - A few frightened people came out of the houses?

Remark:

## 4

☐ **Yes** | ☒ **No** - Frames have fallen off the walls?

☐ **Yes** | ☒ **No** - Dishes have broken?

☐ **Yes** | ☒ **No** - Furniture has been moved?

☐ **Yes** | ☒ **No** - Light furniture has been knocked over?

☐ **Yes** | ☒ **No** - Small fragments of plaster have fallen from ceilings and walls?

☐ **Yes** | ☒ **No** - Large numbers of people have left their homes in a hurry?

☐ **Yes** | ☒ **No** - Some people had the feeling that they were going to fall?

Remark:

## 5. In houses:

☐ **Yes** | ☒ **No** - Heavy pieces of furniture have been knocked over?

☐ **Yes** | ☒ **No** - Plastered ceiling have fallen down?

☐ **Yes** | ☒ **No** - Chimneys have collapsed?

☐ **Yes** | ☒ **No** - Walls were cracked?

☐ **Yes** | ☒ **No** - Landslides have occurred along the banks or embankments.

Remark:

Additional comments:

## Official inquiry for GOTTIGNIES (BE)

Location: 50.479°N 4.061°E, at 2.5 km from the epicentre.

**Imin: 5 - Imax: 5**

---

### 1

☐ Yes | ☒ **No** - A small number of inhabitants, especially those on the upper floors of the houses, noticed a tremor accompanied by a noise comparable to that produced by a heavy car-truck launched at full speed.

Remark:

☒ **Yes** | ☐ No - The trembling of movable objects?

### 2. A large number of people have observed

☒ **Yes** | ☐ No - The shock of glasses or crockery placed very close together?

☒ **Yes** | ☐ No - The shivering of windows and doors?

☒ **Yes** | ☐ No - The creaking of floors?

☒ **Yes** | ☐ No - The rustle of ceilings?

☒ **Yes** | ☐ No - A loud rumbling sound accompanied the shaking?

☐ Yes | ☒ **No** - A number of sleepers woke up?

Note:

### 3

☐ Yes | ☒ **No** - The tremor was perceived by people outdoors?

☒ **Yes** | ☐ No - Inside the houses, everyone was aware of it due to the shaking of the whole construction?

☒ **Yes** | ☐ No - It was as if a heavy vehicle, thrown at full speed, had bumped into the house or a heavy object had overturned in one of the rooms.

☐ Yes | ☒ **No** - We swayed with the chairs, beds, etc...

☐ Yes | ☒ **No** - Freely suspended objects swayed?

☒ **Yes** | ☐ No - Light objects have been moved?

☐ Yes | ☒ **No** - Objects placed on top of furniture have fallen down?

☒ **Yes** | ☐ No - Doors and windows knocked?

☐ Yes | ☒ **No** - Windows broke?

☐ Yes | ☒ **No** - All the sleepers woke up?

☒ **Yes** | ☐ No - A few frightened people came out of the houses?

Remark:

### 4

☐ Yes | ☒ **No** - Frames have fallen off the walls?

☐ Yes | ☒ **No** - Dishes have broken?

☐ Yes | ☒ **No** - Furniture has been moved?

☐ Yes | ☒ **No** - Light furniture has been knocked over?

☒ **Yes** | ☐ No - Small fragments of plaster have fallen from ceilings and walls?

☐ Yes | ☒ **No** - Large numbers of people have left their homes in a hurry?

☐ Yes | ☒ **No** - Some people had the feeling that they were going to fall?

Remark:

### 5. In houses:

☐ Yes | ☒ **No** - Heavy pieces of furniture have been knocked over?

☐ Yes | ☒ **No** - Plastered ceiling have fallen down?

☐ Yes | ☒ **No** - Chimneys have collapsed?

☐ Yes | ☒ **No** - Walls were cracked?

☐ Yes | ☒ **No** - Landslides have occurred along the banks or embankments.

Remark:

Additional comments:

## Official inquiry for GOUY-LEZ-PIETON (BE)

Location: 50.487°N 4.329°E, at 17.9 km from the epicentre.

**Imin: 2 - Imax: 2**

### 1

☒ **Yes** | ☐ **No** - A small number of inhabitants, especially those on the upper floors of the houses, noticed a tremor accompanied by a noise comparable to that produced by a heavy car-truck launched at full speed.

Remark:

☐ Yes | ☒ **No** - The trembling of movable objects?

### 2. A large number of people have observed

☐ Yes | ☒ **No** - The shock of glasses or crockery placed very close together?

☐ Yes | ☒ **No** - The shivering of windows and doors?

☐ Yes | ☒ **No** - The creaking of floors?

☐ Yes | ☒ **No** - The rustle of ceilings?

☐ Yes | ☒ **No** - A loud rumbling sound accompanied the shaking?

☐ Yes | ☒ **No** - A number of sleepers woke up?

Note:

### 3

☐ Yes | ☒ **No** - The tremor was perceived by people outdoors?

☐ Yes | ☒ **No** - Inside the houses, everyone was aware of it due to the shaking of the whole construction?

☐ Yes | ☒ **No** - It was as if a heavy vehicle, thrown at full speed, had bumped into the house or a heavy object had overturned in one of the rooms.

☐ Yes | ☒ **No** - We swayed with the chairs, beds, etc...

☐ Yes | ☒ **No** - Freely suspended objects swayed?

☐ Yes | ☒ **No** - Light objects have been moved?

☐ Yes | ☒ **No** - Objects placed on top of furniture have fallen down?

☐ Yes | ☒ **No** - Doors and windows knocked?

☐ Yes | ☒ **No** - Windows broke?

☐ Yes | ☒ **No** - All the sleepers woke up?

☐ Yes | ☒ **No** - A few frightened people came out of the houses?

Remark:

### 4

☐ Yes | ☒ **No** - Frames have fallen off the walls?

☐ Yes | ☒ **No** - Dishes have broken?

☐ Yes | ☒ **No** - Furniture has been moved?

☐ Yes | ☒ **No** - Light furniture has been knocked over?

☐ Yes | ☒ **No** - Small fragments of plaster have fallen from ceilings and walls?

☐ Yes | ☒ **No** - Large numbers of people have left their homes in a hurry?

☐ Yes | ☒ **No** - Some people had the feeling that they were going to fall?

Remark:

### 5. In houses:

☐ Yes | ☒ **No** - Heavy pieces of furniture have been knocked over?

☐ Yes | ☒ **No** - Plastered ceiling have fallen down?

☐ Yes | ☒ **No** - Chimneys have collapsed?

☐ Yes | ☒ **No** - Walls were cracked?

☐ Yes | ☒ **No** - Landslides have occurred along the banks or embankments.

Remark:

Additional comments:

## Official inquiry for GOZEE (BE)

Location: 50.332°N 4.353°E, at 24.0 km from the epicentre.

**Imin: 4 - Imax: 4**

---

### 1

☐ Yes | ☒ **No** - A small number of inhabitants, especially those on the upper floors of the houses, noticed a tremor accompanied by a noise comparable to that produced by a heavy car-truck launched at full speed.

Remark:

☒ **Yes** | ☐ No - The trembling of movable objects?

### 2. A large number of people have observed

☒ **Yes** | ☐ No - The shock of glasses or crockery placed very close together?

☐ Yes | ☒ **No** - The shivering of windows and doors?

☐ Yes | ☒ **No** - The creaking of floors?

☐ Yes | ☒ **No** - The rustle of ceilings?

☒ **Yes** | ☐ No - A loud rumbling sound accompanied the shaking?

☐ Yes | ☒ **No** - A number of sleepers woke up?

Note:

### 3

☐ Yes | ☒ **No** - The tremor was perceived by people outdoors?

☐ Yes | ☒ **No** - Inside the houses, everyone was aware of it due to the shaking of the whole construction?

☒ **Yes** | ☐ No - It was as if a heavy vehicle, thrown at full speed, had bumped into the house or a heavy object had overturned in one of the rooms.

☒ **Yes** | ☐ No - We swayed with the chairs, beds, etc...

☐ Yes | ☒ **No** - Freely suspended objects swayed?

☐ Yes | ☒ **No** - Light objects have been moved?

☐ Yes | ☒ **No** - Objects placed on top of furniture have fallen down?

☐ Yes | ☒ **No** - Doors and windows knocked?

☐ Yes | ☒ **No** - Windows broke?

☐ Yes | ☒ **No** - All the sleepers woke up?

☐ Yes | ☒ **No** - A few frightened people came out of the houses?

Remark:

### 4

☐ Yes | ☒ **No** - Frames have fallen off the walls?

☐ Yes | ☒ **No** - Dishes have broken?

☐ Yes | ☒ **No** - Furniture has been moved?

☐ Yes | ☒ **No** - Light furniture has been knocked over?

☐ Yes | ☒ **No** - Small fragments of plaster have fallen from ceilings and walls?

☐ Yes | ☒ **No** - Large numbers of people have left their homes in a hurry?

☐ Yes | ☒ **No** - Some people had the feeling that they were going to fall?

Remark:

### 5. In houses:

☐ Yes | ☒ **No** - Heavy pieces of furniture have been knocked over?

☐ Yes | ☒ **No** - Plastered ceiling have fallen down?

☐ Yes | ☒ **No** - Chimneys have collapsed?

☐ Yes | ☒ **No** - Walls were cracked?

☐ Yes | ☒ **No** - Landslides have occurred along the banks or embankments.

Remark:

Additional comments:

## Official inquiry for HAINE-SAINT-PAUL (BE)

Location: 50.455°N 4.19°E, at 7.8 km from the epicentre.

**Imin: 5 - Imax: 5**

---

### 1

☒ **Yes** | ☐ No - A small number of inhabitants, especially those on the upper floors of the houses, noticed a tremor accompanied by a noise comparable to that produced by a heavy car-truck launched at full speed.

Remark:

☒ **Yes** | ☐ No - The trembling of movable objects?

### 2. A large number of people have observed

☒ **Yes** | ☐ No - The shock of glasses or crockery placed very close together?

☒ **Yes** | ☐ No - The shivering of windows and doors?

☒ **Yes** | ☐ No - The creaking of floors?

☒ **Yes** | ☐ No - The rustle of ceilings?

☒ **Yes** | ☐ No - A loud rumbling sound accompanied the shaking?

☒ **Yes** | ☐ No - A number of sleepers woke up?

Note:

### 3

☒ **Yes** | ☐ No - The tremor was perceived by people outdoors?

☒ **Yes** | ☐ No - Inside the houses, everyone was aware of it due to the shaking of the whole construction?

☒ **Yes** | ☐ No - It was as if a heavy vehicle, thrown at full speed, had bumped into the house or a heavy object had overturned in one of the rooms.

☒ **Yes** | ☐ No - We swayed with the chairs, beds, etc...

☒ **Yes** | ☐ No - Freely suspended objects swayed?

☒ **Yes** | ☐ No - Light objects have been moved?

☒ **Yes** | ☐ No - Objects placed on top of furniture have fallen down?

☒ **Yes** | ☐ No - Doors and windows knocked?

☒ **Yes** | ☐ No - Windows broke?

☒ **Yes** | ☐ No - All the sleepers woke up?

☒ **Yes** | ☐ No - A few frightened people came out of the houses?

Remark:

### 4

☒ **Yes** | ☐ No - Frames have fallen off the walls?

☒ **Yes** | ☐ No - Dishes have broken?

☒ **Yes** | ☐ No - Furniture has been moved?

☒ **Yes** | ☐ No - Light furniture has been knocked over?

☒ **Yes** | ☐ No - Small fragments of plaster have fallen from ceilings and walls?

☒ **Yes** | ☐ No - Large numbers of people have left their homes in a hurry?

☒ **Yes** | ☐ No - Some people had the feeling that they were going to fall?

Remark:

### 5. In houses:

☐ Yes | ☒ **No** - Heavy pieces of furniture have been knocked over?

☐ Yes | ☒ **No** - Plastered ceiling have fallen down?

☐ Yes | ☒ **No** - Chimneys have collapsed?

☐ Yes | ☒ **No** - Walls were cracked?

☐ Yes | ☒ **No** - Landslides have occurred along the banks or embankments.

Remark:

Additional comments:

## Official inquiry for HAINE-SAINT-PIERRE (BE)

Location: 50.456°N 4.206°E, at 9.0 km from the epicentre.

Imin: 5 - Imax: 5

### 1

☒ **Yes** | ☐ No - A small number of inhabitants, especially those on the upper floors of the houses, noticed a tremor accompanied by a noise comparable to that produced by a heavy car-truck launched at full speed.

Remark: **même au rez-de-chaussée (3/4/49 a 13H33)**

☒ **Yes** | ☐ No - The trembling of movable objects?

### 2. A large number of people have observed

☐ Yes | ☒ **No** - The shock of glasses or crockery placed very close together?

☐ Yes | ☒ **No** - The shivering of windows and doors?

☐ Yes | ☒ **No** - The creaking of floors?

☐ Yes | ☒ **No** - The rustle of ceilings?

☒ **Yes** | ☐ No - A loud rumbling sound accompanied the shaking?

☐ Yes | ☒ **No** - A number of sleepers woke up?

Note:

### 3

☒ **Yes** | ☐ No - The tremor was perceived by people outdoors?

☒ **Yes** | ☐ No - Inside the houses, everyone was aware of it due to the shaking of the whole construction?

☒ **Yes** | ☐ No - It was as if a heavy vehicle, thrown at full speed, had bumped into the house or a heavy object had overturned in one of the rooms.

☒ **Yes** | ☐ No - We swayed with the chairs, beds, etc...

☒ **Yes** | ☐ No - Freely suspended objects swayed?

☒ **Yes** | ☐ No - Light objects have been moved?

☒ **Yes** | ☐ No - Objects placed on top of furniture have fallen down?

☒ **Yes** | ☐ No - Doors and windows knocked?

☐ Yes | ☒ **No** - Windows broke?

☐ Yes | ☒ **No** - All the sleepers woke up?

☒ **Yes** | ☐ No - A few frightened people came out of the houses?

Remark:

### 4

☐ Yes | ☒ **No** - Frames have fallen off the walls?

☐ Yes | ☒ **No** - Dishes have broken?

☐ Yes | ☒ **No** - Furniture has been moved?

☐ Yes | ☒ **No** - Light furniture has been knocked over?

☐ Yes | ☒ **No** - Small fragments of plaster have fallen from ceilings and walls?

☒ **Yes** | ☐ No - Large numbers of people have left their homes in a hurry?

☒ **Yes** | ☐ No - Some people had the feeling that they were going to fall?

Remark:

### 5. In houses:

☐ Yes | ☒ **No** - Heavy pieces of furniture have been knocked over?

☐ Yes | ☒ **No** - Plastered ceiling have fallen down?

☒ **Yes** | ☐ No - Chimneys have collapsed?

☐ Yes | ☒ **No** - Walls were cracked?

☐ Yes | ☒ **No** - Landslides have occurred along the banks or embankments.

Remark:

Additional comments: **d'une manière générale, les phénomènes relatés dans la lettre sont bien, d'une façon générale, ceux ressentis à Haine-St-Pierre vers 13H33**

## Official inquiry for HARMIGNIES (BE)

Location: 50.404°N 4.019°E, at 7.5 km from the epicentre.

**Imin: 5 - Imax: 6**

### 1

☐ Yes | ☒ **No** - A small number of inhabitants, especially those on the upper floors of the houses, noticed a tremor accompanied by a noise comparable to that produced by a heavy car-truck launched at full speed.

Remark:

☒ **Yes** | ☐ No - The trembling of movable objects?

### 2. A large number of people have observed

☒ **Yes** | ☐ No - The shock of glasses or crockery placed very close together?

☒ **Yes** | ☐ No - The shivering of windows and doors?

☒ **Yes** | ☐ No - The creaking of floors?

☒ **Yes** | ☐ No - The rustle of ceilings?

☒ **Yes** | ☐ No - A loud rumbling sound accompanied the shaking?

☒ **Yes** | ☐ No - A number of sleepers woke up?

Note:

### 3

☒ **Yes** | ☐ No - The tremor was perceived by people outdoors?

☒ **Yes** | ☐ No - Inside the houses, everyone was aware of it due to the shaking of the whole construction?

☒ **Yes** | ☐ No - It was as if a heavy vehicle, thrown at full speed, had bumped into the house or a heavy object had overturned in one of the rooms.

☒ **Yes** | ☐ No - We swayed with the chairs, beds, etc...

☒ **Yes** | ☐ No - Freely suspended objects swayed?

☒ **Yes** | ☐ No - Light objects have been moved?

☒ **Yes** | ☐ No - Objects placed on top of furniture have fallen down?

☒ **Yes** | ☐ No - Doors and windows knocked?

☒ **Yes** | ☐ No - Windows broke?

☒ **Yes** | ☐ No - All the sleepers woke up?

☒ **Yes** | ☐ No - A few frightened people came out of the houses?

Remark:

### 4

☐ Yes | ☒ **No** - Frames have fallen off the walls?

☐ Yes | ☒ **No** - Dishes have broken?

☐ Yes | ☒ **No** - Furniture has been moved?

☐ Yes | ☒ **No** - Light furniture has been knocked over?

☐ Yes | ☒ **No** - Small fragments of plaster have fallen from ceilings and walls?

☒ **Yes** | ☐ No - Large numbers of people have left their homes in a hurry?

☒ **Yes** | ☐ No - Some people had the feeling that they were going to fall?

Remark:

### 5. In houses:

☐ Yes | ☒ **No** - Heavy pieces of furniture have been knocked over?

☐ Yes | ☒ **No** - Plastered ceiling have fallen down?

☒ **Yes** | ☐ No - Chimneys have collapsed?

☐ Yes | ☒ **No** - Walls were cracked?

☐ Yes | ☒ **No** - Landslides have occurred along the banks or embankments.

Remark:

Additional comments:

## Official inquiry for HARVENG (BE)

Location: 50.396°N 3.988°E, at 9.7 km from the epicentre.

**Imin: 4 - Imax: 4**

---

### 1

☐ Yes | ☒ **No** - A small number of inhabitants, especially those on the upper floors of the houses, noticed a tremor accompanied by a noise comparable to that produced by a heavy car-truck launched at full speed.

Remark:

☐ Yes | ☒ **No** - The trembling of movable objects?

### 2. A large number of people have observed

☐ Yes | ☒ **No** - The shock of glasses or crockery placed very close together?

☒ **Yes** | ☐ **No** - The shivering of windows and doors?

☐ Yes | ☒ **No** - The creaking of floors?

☐ Yes | ☒ **No** - The rustle of ceilings?

☐ Yes | ☒ **No** - A loud rumbling sound accompanied the shaking?

☐ Yes | ☒ **No** - A number of sleepers woke up?

Note:

### 3

☐ Yes | ☒ **No** - The tremor was perceived by people outdoors?

☒ **Yes** | ☐ **No** - Inside the houses, everyone was aware of it due to the shaking of the whole construction?

☒ **Yes** | ☐ **No** - It was as if a heavy vehicle, thrown at full speed, had bumped into the house or a heavy object had overturned in one of the rooms.

☐ Yes | ☒ **No** - We swayed with the chairs, beds, etc...

☐ Yes | ☒ **No** - Freely suspended objects swayed?

☐ Yes | ☒ **No** - Light objects have been moved?

☐ Yes | ☒ **No** - Objects placed on top of furniture have fallen down?

☐ Yes | ☒ **No** - Doors and windows knocked?

☐ Yes | ☒ **No** - Windows broke?

☐ Yes | ☒ **No** - All the sleepers woke up?

☒ **Yes** | ☐ **No** - A few frightened people came out of the houses?

Remark:

### 4

☐ Yes | ☒ **No** - Frames have fallen off the walls?

☐ Yes | ☒ **No** - Dishes have broken?

☐ Yes | ☒ **No** - Furniture has been moved?

☐ Yes | ☒ **No** - Light furniture has been knocked over?

☐ Yes | ☒ **No** - Small fragments of plaster have fallen from ceilings and walls?

☐ Yes | ☒ **No** - Large numbers of people have left their homes in a hurry?

☐ Yes | ☒ **No** - Some people had the feeling that they were going to fall?

Remark:

### 5. In houses:

☐ Yes | ☒ **No** - Heavy pieces of furniture have been knocked over?

☐ Yes | ☒ **No** - Plastered ceiling have fallen down?

☐ Yes | ☒ **No** - Chimneys have collapsed?

☐ Yes | ☒ **No** - Walls were cracked?

☐ Yes | ☒ **No** - Landslides have occurred along the banks or embankments.

Remark:

Additional comments:

## Official inquiry for HAULCHIN (BE)

Location: 50.384°N 4.083°E, at 8.5 km from the epicentre.

**Imin: 5 - Imax: 6**

---

### 1

☒ **Yes** | ☐ No - A small number of inhabitants, especially those on the upper floors of the houses, noticed a tremor accompanied by a noise comparable to that produced by a heavy car-truck launched at full speed.

Remark:

☒ **Yes** | ☐ No - The trembling of movable objects?

### 2. A large number of people have observed

☒ **Yes** | ☐ No - The shock of glasses or crockery placed very close together?

☒ **Yes** | ☐ No - The shivering of windows and doors?

☒ **Yes** | ☐ No - The creaking of floors?

☒ **Yes** | ☐ No - The rustle of ceilings?

☒ **Yes** | ☐ No - A loud rumbling sound accompanied the shaking?

☒ **Yes** | ☐ No - A number of sleepers woke up?

Note:

### 3

☐ Yes | ☒ **No** - The tremor was perceived by people outdoors?

☒ **Yes** | ☐ No - Inside the houses, everyone was aware of it due to the shaking of the whole construction?

☒ **Yes** | ☐ No - It was as if a heavy vehicle, thrown at full speed, had bumped into the house or a heavy object had overturned in one of the rooms.

☒ **Yes** | ☐ No - We swayed with the chairs, beds, etc...

☒ **Yes** | ☐ No - Freely suspended objects swayed?

☒ **Yes** | ☐ No - Light objects have been moved?

☒ **Yes** | ☐ No - Objects placed on top of furniture have fallen down?

☒ **Yes** | ☐ No - Doors and windows knocked?

☐ Yes | ☒ **No** - Windows broke?

☒ **Yes** | ☐ No - All the sleepers woke up?

☒ **Yes** | ☐ No - A few frightened people came out of the houses?

Remark:

### 4

☐ Yes | ☒ **No** - Frames have fallen off the walls?

☐ Yes | ☒ **No** - Dishes have broken?

☐ Yes | ☒ **No** - Furniture has been moved?

☐ Yes | ☒ **No** - Light furniture has been knocked over?

☐ Yes | ☒ **No** - Small fragments of plaster have fallen from ceilings and walls?

☒ **Yes** | ☐ No - Large numbers of people have left their homes in a hurry?

☒ **Yes** | ☐ No - Some people had the feeling that they were going to fall?

Remark:

### 5. In houses:

☐ Yes | ☒ **No** - Heavy pieces of furniture have been knocked over?

☐ Yes | ☒ **No** - Plastered ceiling have fallen down?

☒ **Yes** | ☐ No - Chimneys have collapsed?

☐ Yes | ☒ **No** - Walls were cracked?

☐ Yes | ☒ **No** - Landslides have occurred along the banks or embankments.

Remark:

Additional comments:

## Official inquiry for HAVRE (BE)

Location: 50.466°N 4.047°E, at 2.5 km from the epicentre.

**Imin: 7 - Imax: 7**

### 1

☐ Yes | ☒ **No** - A small number of inhabitants, especially those on the upper floors of the houses, noticed a tremor accompanied by a noise comparable to that produced by a heavy car-truck launched at full speed.

Remark:

☐ Yes | ☒ **No** - The trembling of movable objects?

### 2. A large number of people have observed

☐ Yes | ☒ **No** - The shock of glasses or crockery placed very close together?

☐ Yes | ☒ **No** - The shivering of windows and doors?

☐ Yes | ☒ **No** - The creaking of floors?

☐ Yes | ☒ **No** - The rustle of ceilings?

☐ Yes | ☒ **No** - A loud rumbling sound accompanied the shaking?

☐ Yes | ☒ **No** - A number of sleepers woke up?

Note:

### 3

☒ **Yes** | ☐ No - The tremor was perceived by people outdoors?

☒ **Yes** | ☐ No - Inside the houses, everyone was aware of it due to the shaking of the whole construction?

☒ **Yes** | ☐ No - It was as if a heavy vehicle, thrown at full speed, had bumped into the house or a heavy object had overturned in one of the rooms.

☒ **Yes** | ☐ No - We swayed with the chairs, beds, etc...

☒ **Yes** | ☐ No - Freely suspended objects swayed?

☒ **Yes** | ☐ No - Light objects have been moved?

☒ **Yes** | ☐ No - Objects placed on top of furniture have fallen down?

☒ **Yes** | ☐ No - Doors and windows knocked?

☒ **Yes** | ☐ No - Windows broke?

☒ **Yes** | ☐ No - All the sleepers woke up?

☐ Yes | ☒ **No** - A few frightened people came out of the houses?

Remark:

### 4

☐ Yes | ☒ **No** - Frames have fallen off the walls?

☐ Yes | ☒ **No** - Dishes have broken?

☐ Yes | ☒ **No** - Furniture has been moved?

☐ Yes | ☒ **No** - Light furniture has been knocked over?

☒ **Yes** | ☐ No - Small fragments of plaster have fallen from ceilings and walls?

☒ **Yes** | ☐ No - Large numbers of people have left their homes in a hurry?

☒ **Yes** | ☐ No - Some people had the feeling that they were going to fall?

Remark:

### 5. In houses:

☐ Yes | ☒ **No** - Heavy pieces of furniture have been knocked over?

☒ **Yes** | ☐ No - Plastered ceiling have fallen down?

☒ **Yes** | ☐ No - Chimneys have collapsed?

☒ **Yes** | ☐ No - Walls were cracked?

☐ Yes | ☒ **No** - Landslides have occurred along the banks or embankments.

Remark:

Additional comments: **une personne a été blessée au pied par la chute de matériaux**

## Official inquiry for HORRUES (BE)

Location: 50.609°N 4.044°E, at 16.7 km from the epicentre.

**Imin: 2 - Imax: 2**

### 1

☒ **Yes** | ☐ **No** - A small number of inhabitants, especially those on the upper floors of the houses, noticed a tremor accompanied by a noise comparable to that produced by a heavy car-truck launched at full speed.

Remark:

☐ Yes | ☒ **No** - The trembling of movable objects?

### 2. A large number of people have observed

☐ Yes | ☒ **No** - The shock of glasses or crockery placed very close together?

☐ Yes | ☒ **No** - The shivering of windows and doors?

☐ Yes | ☒ **No** - The creaking of floors?

☐ Yes | ☒ **No** - The rustle of ceilings?

☐ Yes | ☒ **No** - A loud rumbling sound accompanied the shaking?

☐ Yes | ☒ **No** - A number of sleepers woke up?

Note:

### 3

☐ Yes | ☒ **No** - The tremor was perceived by people outdoors?

☐ Yes | ☒ **No** - Inside the houses, everyone was aware of it due to the shaking of the whole construction?

☐ Yes | ☒ **No** - It was as if a heavy vehicle, thrown at full speed, had bumped into the house or a heavy object had overturned in one of the rooms.

☐ Yes | ☒ **No** - We swayed with the chairs, beds, etc...

☐ Yes | ☒ **No** - Freely suspended objects swayed?

☐ Yes | ☒ **No** - Light objects have been moved?

☐ Yes | ☒ **No** - Objects placed on top of furniture have fallen down?

☐ Yes | ☒ **No** - Doors and windows knocked?

☐ Yes | ☒ **No** - Windows broke?

☐ Yes | ☒ **No** - All the sleepers woke up?

☐ Yes | ☒ **No** - A few frightened people came out of the houses?

Remark:

### 4

☐ Yes | ☒ **No** - Frames have fallen off the walls?

☐ Yes | ☒ **No** - Dishes have broken?

☐ Yes | ☒ **No** - Furniture has been moved?

☐ Yes | ☒ **No** - Light furniture has been knocked over?

☐ Yes | ☒ **No** - Small fragments of plaster have fallen from ceilings and walls?

☐ Yes | ☒ **No** - Large numbers of people have left their homes in a hurry?

☐ Yes | ☒ **No** - Some people had the feeling that they were going to fall?

Remark:

### 5. In houses:

☐ Yes | ☒ **No** - Heavy pieces of furniture have been knocked over?

☐ Yes | ☒ **No** - Plastered ceiling have fallen down?

☐ Yes | ☒ **No** - Chimneys have collapsed?

☐ Yes | ☒ **No** - Walls were cracked?

☐ Yes | ☒ **No** - Landslides have occurred along the banks or embankments.

Remark:

Additional comments: **les tremblement de terre du 3 avril 1949 ont été remarqué par un petit nombre d'habitants. Aucun dégât n'a été signalé, la secousse ayant été très faible.**

## Official inquiry for HOUDENG-AIMERIES (BE)

Location: 50.483°N 4.151°E, at 5.7 km from the epicentre.

**Imin: 5 - Imax: 5**

### 1

☐ Yes | ☒ **No** - A small number of inhabitants, especially those on the upper floors of the houses, noticed a tremor accompanied by a noise comparable to that produced by a heavy car-truck launched at full speed.

Remark:

☒ **Yes** | ☐ No - The trembling of movable objects?

### 2. A large number of people have observed

☒ **Yes** | ☐ No - The shock of glasses or crockery placed very close together?

☒ **Yes** | ☐ No - The shivering of windows and doors?

☒ **Yes** | ☐ No - The creaking of floors?

☒ **Yes** | ☐ No - The rustle of ceilings?

☒ **Yes** | ☐ No - A loud rumbling sound accompanied the shaking?

☒ **Yes** | ☐ No - A number of sleepers woke up?

Note:

### 3

☐ Yes | ☒ **No** - The tremor was perceived by people outdoors?

☒ **Yes** | ☐ No - Inside the houses, everyone was aware of it due to the shaking of the whole construction?

☒ **Yes** | ☐ No - It was as if a heavy vehicle, thrown at full speed, had bumped into the house or a heavy object had overturned in one of the rooms.

☒ **Yes** | ☐ No - We swayed with the chairs, beds, etc...

☒ **Yes** | ☐ No - Freely suspended objects swayed?

☐ Yes | ☒ **No** - Light objects have been moved?

☐ Yes | ☒ **No** - Objects placed on top of furniture have fallen down?

☒ **Yes** | ☐ No - Doors and windows knocked?

☐ Yes | ☒ **No** - Windows broke?

☐ Yes | ☒ **No** - All the sleepers woke up?

☒ **Yes** | ☐ No - A few frightened people came out of the houses?

Remark:

### 4

☐ Yes | ☒ **No** - Frames have fallen off the walls?

☐ Yes | ☒ **No** - Dishes have broken?

☐ Yes | ☒ **No** - Furniture has been moved?

☐ Yes | ☒ **No** - Light furniture has been knocked over?

☐ Yes | ☒ **No** - Small fragments of plaster have fallen from ceilings and walls?

☐ Yes | ☒ **No** - Large numbers of people have left their homes in a hurry?

☒ **Yes** | ☐ No - Some people had the feeling that they were going to fall?

Remark: *il y a eu de très léger déplacement de cadres.*

### 5. In houses:

☐ Yes | ☒ **No** - Heavy pieces of furniture have been knocked over?

☐ Yes | ☒ **No** - Plastered ceiling have fallen down?

☐ Yes | ☒ **No** - Chimneys have collapsed?

☐ Yes | ☒ **No** - Walls were cracked?

☐ Yes | ☒ **No** - Landslides have occurred along the banks or embankments.

Remark:

Additional comments:

## Official inquiry for HOUDENG-GOEGNIES (BE)

Location: 50.484°N 4.156°E, at 6.0 km from the epicentre.

Imin: 5 - Imax: 5

### 1

☒ **Yes** | ☐ No - A small number of inhabitants, especially those on the upper floors of the houses, noticed a tremor accompanied by a noise comparable to that produced by a heavy car-truck launched at full speed.

Remark:

☒ **Yes** | ☐ No - The trembling of movable objects?

### 2. A large number of people have observed

☐ Yes | ☒ **No** - The shock of glasses or crockery placed very close together?

☒ **Yes** | ☐ No - The shivering of windows and doors?

☐ Yes | ☒ **No** - The creaking of floors?

☐ Yes | ☒ **No** - The rustle of ceilings?

☐ Yes | ☒ **No** - A loud rumbling sound accompanied the shaking?

☐ Yes | ☒ **No** - A number of sleepers woke up?

Note: ***un cheminée a été en partie démolie et trois carreaux ont été brisé par une chute de briques.***

### 3

☒ **Yes** | ☐ No - The tremor was perceived by people outdoors?

☒ **Yes** | ☐ No - Inside the houses, everyone was aware of it due to the shaking of the whole construction?

☒ **Yes** | ☐ No - It was as if a heavy vehicle, thrown at full speed, had bumped into the house or a heavy object had overturned in one of the rooms.

☐ Yes | ☒ **No** - We swayed with the chairs, beds, etc...

☐ Yes | ☒ **No** - Freely suspended objects swayed?

☐ Yes | ☒ **No** - Light objects have been moved?

☐ Yes | ☒ **No** - Objects placed on top of furniture have fallen down?

☐ Yes | ☒ **No** - Doors and windows knocked?

☐ Yes | ☒ **No** - Windows broke?

☐ Yes | ☒ **No** - All the sleepers woke up?

☒ **Yes** | ☐ No - A few frightened people came out of the houses?

Remark:

### 4

☐ Yes | ☒ **No** - Frames have fallen off the walls?

☐ Yes | ☒ **No** - Dishes have broken?

☐ Yes | ☒ **No** - Furniture has been moved?

☐ Yes | ☒ **No** - Light furniture has been knocked over?

☐ Yes | ☒ **No** - Small fragments of plaster have fallen from ceilings and walls?

☐ Yes | ☒ **No** - Large numbers of people have left their homes in a hurry?

☐ Yes | ☒ **No** - Some people had the feeling that they were going to fall?

Remark:

### 5. In houses:

☐ Yes | ☒ **No** - Heavy pieces of furniture have been knocked over?

☐ Yes | ☒ **No** - Plastered ceiling have fallen down?

☒ **Yes** | ☐ No - Chimneys have collapsed?

☐ Yes | ☒ **No** - Walls were cracked?

☐ Yes | ☒ **No** - Landslides have occurred along the banks or embankments.

Remark:

Additional comments:

## Official inquiry for HYON (BE)

Location: 50.441°N 3.966°E, at 8.3 km from the epicentre.

**Imin: 5 - Imax: 5**

---

### 1

☐ Yes | ☒ **No** - A small number of inhabitants, especially those on the upper floors of the houses, noticed a tremor accompanied by a noise comparable to that produced by a heavy car-truck launched at full speed.

Remark:

☒ **Yes** | ☐ No - The trembling of movable objects?

### 2. A large number of people have observed

☒ **Yes** | ☐ No - The shock of glasses or crockery placed very close together?

☒ **Yes** | ☐ No - The shivering of windows and doors?

☐ Yes | ☒ **No** - The creaking of floors?

☐ Yes | ☒ **No** - The rustle of ceilings?

☒ **Yes** | ☐ No - A loud rumbling sound accompanied the shaking?

☐ Yes | ☒ **No** - A number of sleepers woke up?

Note:

### 3

☐ Yes | ☒ **No** - The tremor was perceived by people outdoors?

☒ **Yes** | ☐ No - Inside the houses, everyone was aware of it due to the shaking of the whole construction?

☒ **Yes** | ☐ No - It was as if a heavy vehicle, thrown at full speed, had bumped into the house or a heavy object had overturned in one of the rooms.

☒ **Yes** | ☐ No - We swayed with the chairs, beds, etc...

☒ **Yes** | ☐ No - Freely suspended objects swayed?

☒ **Yes** | ☐ No - Light objects have been moved?

☐ Yes | ☒ **No** - Objects placed on top of furniture have fallen down?

☐ Yes | ☒ **No** - Doors and windows knocked?

☐ Yes | ☒ **No** - Windows broke?

☐ Yes | ☒ **No** - All the sleepers woke up?

☐ Yes | ☒ **No** - A few frightened people came out of the houses?

Remark:

### 4

☐ Yes | ☒ **No** - Frames have fallen off the walls?

☐ Yes | ☒ **No** - Dishes have broken?

☐ Yes | ☒ **No** - Furniture has been moved?

☐ Yes | ☒ **No** - Light furniture has been knocked over?

☐ Yes | ☒ **No** - Small fragments of plaster have fallen from ceilings and walls?

☐ Yes | ☒ **No** - Large numbers of people have left their homes in a hurry?

☐ Yes | ☒ **No** - Some people had the feeling that they were going to fall?

Remark:

### 5. In houses:

☐ Yes | ☒ **No** - Heavy pieces of furniture have been knocked over?

☐ Yes | ☒ **No** - Plastered ceiling have fallen down?

☒ **Yes** | ☐ No - Chimneys have collapsed?

☐ Yes | ☒ **No** - Walls were cracked?

☐ Yes | ☒ **No** - Landslides have occurred along the banks or embankments.

Remark:

Additional comments:

## Official inquiry for ITTRE (BE)

Location: 50.651°N 4.265°E, at 25.0 km from the epicentre.

**Imin: 3 - Imax: 3**

---

### 1

☒ **Yes** | ☐ **No** - A small number of inhabitants, especially those on the upper floors of the houses, noticed a tremor accompanied by a noise comparable to that produced by a heavy car-truck launched at full speed.

Remark:

☐ Yes | ☒ **No** - The trembling of movable objects?

### 2. A large number of people have observed

☐ Yes | ☒ **No** - The shock of glasses or crockery placed very close together?

☐ Yes | ☒ **No** - The shivering of windows and doors?

☐ Yes | ☒ **No** - The creaking of floors?

☐ Yes | ☒ **No** - The rustle of ceilings?

☐ Yes | ☒ **No** - A loud rumbling sound accompanied the shaking?

☐ Yes | ☒ **No** - A number of sleepers woke up?

Note:

### 3

☐ Yes | ☒ **No** - The tremor was perceived by people outdoors?

☐ Yes | ☒ **No** - Inside the houses, everyone was aware of it due to the shaking of the whole construction?

☐ Yes | ☒ **No** - It was as if a heavy vehicle, thrown at full speed, had bumped into the house or a heavy object had overturned in one of the rooms.

☐ Yes | ☒ **No** - We swayed with the chairs, beds, etc...

☐ Yes | ☒ **No** - Freely suspended objects swayed?

☐ Yes | ☒ **No** - Light objects have been moved?

☐ Yes | ☒ **No** - Objects placed on top of furniture have fallen down?

☐ Yes | ☒ **No** - Doors and windows knocked?

☐ Yes | ☒ **No** - Windows broke?

☐ Yes | ☒ **No** - All the sleepers woke up?

☐ Yes | ☒ **No** - A few frightened people came out of the houses?

Remark:

### 4

☐ Yes | ☒ **No** - Frames have fallen off the walls?

☐ Yes | ☒ **No** - Dishes have broken?

☐ Yes | ☒ **No** - Furniture has been moved?

☐ Yes | ☒ **No** - Light furniture has been knocked over?

☐ Yes | ☒ **No** - Small fragments of plaster have fallen from ceilings and walls?

☐ Yes | ☒ **No** - Large numbers of people have left their homes in a hurry?

☐ Yes | ☒ **No** - Some people had the feeling that they were going to fall?

Remark:

### 5. In houses:

☐ Yes | ☒ **No** - Heavy pieces of furniture have been knocked over?

☐ Yes | ☒ **No** - Plastered ceiling have fallen down?

☐ Yes | ☒ **No** - Chimneys have collapsed?

☐ Yes | ☒ **No** - Walls were cracked?

☐ Yes | ☒ **No** - Landslides have occurred along the banks or embankments.

Remark:

Additional comments:

## Official inquiry for JEMAPPES (BE)

Location: 50.449°N 3.888°E, at 13.7 km from the epicentre.

**Imin: 4 - Imax: 5**

### 1

☒ **Yes** | ☐ No - A small number of inhabitants, especially those on the upper floors of the houses, noticed a tremor accompanied by a noise comparable to that produced by a heavy car-truck launched at full speed.

Remark:

☒ **Yes** | ☐ No - The trembling of movable objects?

### 2. A large number of people have observed

☒ **Yes** | ☐ No - The shock of glasses or crockery placed very close together?

☒ **Yes** | ☐ No - The shivering of windows and doors?

☒ **Yes** | ☐ No - The creaking of floors?

☒ **Yes** | ☐ No - The rustle of ceilings?

☒ **Yes** | ☐ No - A loud rumbling sound accompanied the shaking?

☐ Yes | ☒ **No** - A number of sleepers woke up?

Note:

### 3

☐ Yes | ☒ **No** - The tremor was perceived by people outdoors?

☒ **Yes** | ☐ No - Inside the houses, everyone was aware of it due to the shaking of the whole construction?

☒ **Yes** | ☐ No - It was as if a heavy vehicle, thrown at full speed, had bumped into the house or a heavy object had overturned in one of the rooms.

☒ **Yes** | ☐ No - We swayed with the chairs, beds, etc...

☒ **Yes** | ☐ No - Freely suspended objects swayed?

☐ Yes | ☒ **No** - Light objects have been moved?

☐ Yes | ☒ **No** - Objects placed on top of furniture have fallen down?

☐ Yes | ☒ **No** - Doors and windows knocked?

☐ Yes | ☒ **No** - Windows broke?

☐ Yes | ☒ **No** - All the sleepers woke up?

☒ **Yes** | ☐ No - A few frightened people came out of the houses?

Remark: **beaucoup de personnes effrayées sont sorties des habitations**

### 4

☐ Yes | ☒ **No** - Frames have fallen off the walls?

☐ Yes | ☒ **No** - Dishes have broken?

☐ Yes | ☒ **No** - Furniture has been moved?

☐ Yes | ☒ **No** - Light furniture has been knocked over?

☐ Yes | ☒ **No** - Small fragments of plaster have fallen from ceilings and walls?

☐ Yes | ☒ **No** - Large numbers of people have left their homes in a hurry?

☐ Yes | ☒ **No** - Some people had the feeling that they were going to fall?

Remark:

### 5. In houses:

☐ Yes | ☒ **No** - Heavy pieces of furniture have been knocked over?

☐ Yes | ☒ **No** - Plastered ceiling have fallen down?

☐ Yes | ☒ **No** - Chimneys have collapsed?

☐ Yes | ☒ **No** - Walls were cracked?

☐ Yes | ☒ **No** - Landslides have occurred along the banks or embankments.

Remark:

Additional comments: **seul deux tremblement ont été ressenti: un a 13H23 et l'autre a 13H33**

## Official inquiry for JURBISE (BE)

Location: 50.533°N 3.912°E, at 14.4 km from the epicentre.

Imin: 4 - Imax: 4

1

☒ **Yes** | ☐ No - A small number of inhabitants, especially those on the upper floors of the houses, noticed a tremor accompanied by a noise comparable to that produced by a heavy car-truck launched at full speed.

Remark: **Un petit nombre d'habitants ont remarqué un ébranlement accompagné d'un bruit comparables à celui que produit un lourd auto-camion lancé à toute vitesse.**

☒ **Yes** | ☐ No - The trembling of movable objects?

### 2. A large number of people have observed

☐ Yes | ☒ **No** - The shock of glasses or crockery placed very close together?

☒ **Yes** | ☐ No - The shivering of windows and doors?

☐ Yes | ☒ **No** - The creaking of floors?

☐ Yes | ☒ **No** - The rustle of ceilings?

☐ Yes | ☒ **No** - A loud rumbling sound accompanied the shaking?

☐ Yes | ☒ **No** - A number of sleepers woke up?

Note:

3

☒ **Yes** | ☐ No - The tremor was perceived by people outdoors?

☐ Yes | ☒ **No** - Inside the houses, everyone was aware of it due to the shaking of the whole construction?

☒ **Yes** | ☐ No - It was as if a heavy vehicle, thrown at full speed, had bumped into the house or a heavy object had overturned in one of the rooms.

☐ Yes | ☒ **No** - We swayed with the chairs, beds, etc...

☐ Yes | ☒ **No** - Freely suspended objects swayed?

☐ Yes | ☒ **No** - Light objects have been moved?

☐ Yes | ☒ **No** - Objects placed on top of furniture have fallen down?

☐ Yes | ☒ **No** - Doors and windows knocked?

☐ Yes | ☒ **No** - Windows broke?

☐ Yes | ☒ **No** - All the sleepers woke up?

☐ Yes | ☒ **No** - A few frightened people came out of the houses?

Remark: **On a eu l'impression qu'un objet lourd s'était renversé dans une des pièces.**

4

☐ Yes | ☒ **No** - Frames have fallen off the walls?

☐ Yes | ☒ **No** - Dishes have broken?

☐ Yes | ☒ **No** - Furniture has been moved?

☐ Yes | ☒ **No** - Light furniture has been knocked over?

☐ Yes | ☒ **No** - Small fragments of plaster have fallen from ceilings and walls?

☐ Yes | ☒ **No** - Large numbers of people have left their homes in a hurry?

☐ Yes | ☒ **No** - Some people had the feeling that they were going to fall?

Remark:

### 5. In houses:

☐ Yes | ☒ **No** - Heavy pieces of furniture have been knocked over?

☐ Yes | ☒ **No** - Plastered ceiling have fallen down?

☐ Yes | ☒ **No** - Chimneys have collapsed?

☐ Yes | ☒ **No** - Walls were cracked?

☐ Yes | ☒ **No** - Landslides have occurred along the banks or embankments.

Remark:

Additional comments:

## Official inquiry for LA HESTRE (BE)

Location: 50.475°N 4.239°E, at 11.4 km from the epicentre.

**Imin: 4 - Imax: 4**

---

### 1

☐ Yes | ☒ **No** - A small number of inhabitants, especially those on the upper floors of the houses, noticed a tremor accompanied by a noise comparable to that produced by a heavy car-truck launched at full speed.

Remark:

☐ Yes | ☒ **No** - The trembling of movable objects?

### 2. A large number of people have observed

☐ Yes | ☒ **No** - The shock of glasses or crockery placed very close together?

☐ Yes | ☒ **No** - The shivering of windows and doors?

☐ Yes | ☒ **No** - The creaking of floors?

☐ Yes | ☒ **No** - The rustle of ceilings?

☐ Yes | ☒ **No** - A loud rumbling sound accompanied the shaking?

☐ Yes | ☒ **No** - A number of sleepers woke up?

Note:

### 3

☒ **Yes** | ☐ No - The tremor was perceived by people outdoors?

☒ **Yes** | ☐ No - Inside the houses, everyone was aware of it due to the shaking of the whole construction?

☐ Yes | ☒ **No** - It was as if a heavy vehicle, thrown at full speed, had bumped into the house or a heavy object had overturned in one of the rooms.

☒ **Yes** | ☐ No - We swayed with the chairs, beds, etc...

☒ **Yes** | ☐ No - Freely suspended objects swayed?

☐ Yes | ☒ **No** - Light objects have been moved?

☐ Yes | ☒ **No** - Objects placed on top of furniture have fallen down?

☐ Yes | ☒ **No** - Doors and windows knocked?

☐ Yes | ☒ **No** - Windows broke?

☐ Yes | ☒ **No** - All the sleepers woke up?

☒ **Yes** | ☐ No - A few frightened people came out of the houses?

Remark:

### 4

☐ Yes | ☒ **No** - Frames have fallen off the walls?

☐ Yes | ☒ **No** - Dishes have broken?

☐ Yes | ☒ **No** - Furniture has been moved?

☐ Yes | ☒ **No** - Light furniture has been knocked over?

☐ Yes | ☒ **No** - Small fragments of plaster have fallen from ceilings and walls?

☐ Yes | ☒ **No** - Large numbers of people have left their homes in a hurry?

☐ Yes | ☒ **No** - Some people had the feeling that they were going to fall?

Remark:

### 5. In houses:

☐ Yes | ☒ **No** - Heavy pieces of furniture have been knocked over?

☐ Yes | ☒ **No** - Plastered ceiling have fallen down?

☐ Yes | ☒ **No** - Chimneys have collapsed?

☐ Yes | ☒ **No** - Walls were cracked?

☐ Yes | ☒ **No** - Landslides have occurred along the banks or embankments.

Remark:

Additional comments:

## Official inquiry for LA LOUVIERE (BE)

Location: 50.478°N 4.19°E, at 8.1 km from the epicentre.

Imin: 5 - Imax: 6

### 1

☒ **Yes** | ☐ No - A small number of inhabitants, especially those on the upper floors of the houses, noticed a tremor accompanied by a noise comparable to that produced by a heavy car-truck launched at full speed.

Remark: **un grand nombre d'habitants ont remarqué l'ébranlement. l'ébranlement et l'intensité du bruit était plus faible du côté Sud-ouest**

☒ **Yes** | ☐ No - The trembling of movable objects?

### 2. A large number of people have observed

☒ **Yes** | ☐ No - The shock of glasses or crockery placed very close together?

☒ **Yes** | ☐ No - The shivering of windows and doors?

☒ **Yes** | ☐ No - The creaking of floors?

☒ **Yes** | ☐ No - The rustle of ceilings?

☒ **Yes** | ☐ No - A loud rumbling sound accompanied the shaking?

☒ **Yes** | ☐ No - A number of sleepers woke up?

Note: **plus faiblement du côté Sud-Ouest**

### 3

☒ **Yes** | ☐ No - The tremor was perceived by people outdoors?

☒ **Yes** | ☐ No - Inside the houses, everyone was aware of it due to the shaking of the whole construction?

☒ **Yes** | ☐ No - It was as if a heavy vehicle, thrown at full speed, had bumped into the house or a heavy object had overturned in one of the rooms.

☒ **Yes** | ☐ No - We swayed with the chairs, beds, etc...

☒ **Yes** | ☐ No - Freely suspended objects swayed?

☒ **Yes** | ☐ No - Light objects have been moved?

☒ **Yes** | ☐ No - Objects placed on top of furniture have fallen down?

☒ **Yes** | ☐ No - Doors and windows knocked?

☒ **Yes** | ☐ No - Windows broke?

☒ **Yes** | ☐ No - All the sleepers woke up?

☒ **Yes** | ☐ No - A few frightened people came out of the houses?

Remark: **ces phénomènes était plus important du côté Nord-Ouest**

### 4

☒ **Yes** | ☐ No - Frames have fallen off the walls?

☒ **Yes** | ☐ No - Dishes have broken?

☒ **Yes** | ☐ No - Furniture has been moved?

☒ **Yes** | ☐ No - Light furniture has been knocked over?

☒ **Yes** | ☐ No - Small fragments of plaster have fallen from ceilings and walls?

☒ **Yes** | ☐ No - Large numbers of people have left their homes in a hurry?

☒ **Yes** | ☐ No - Some people had the feeling that they were going to fall?

Remark: **spécialement du côté Nord-Ouest mais très peu de dégâts**

### 5. In houses:

☐ Yes | ☒ **No** - Heavy pieces of furniture have been knocked over?

☒ **Yes** | ☐ No - Plastered ceiling have fallen down?

☒ **Yes** | ☐ No - Chimneys have collapsed?

☐ Yes | ☒ **No** - Walls were cracked?

☐ Yes | ☒ **No** - Landslides have occurred along the banks or embankments.

Remark: **très peu de dégâts**

Additional comments:

## Official inquiry for LE ROEULX (BE)

Location: 50.503°N 4.109°E, at 5.2 km from the epicentre.

**Imin: 4 - Imax: 4**

### 1

☒ **Yes** | ☐ **No** - A small number of inhabitants, especially those on the upper floors of the houses, noticed a tremor accompanied by a noise comparable to that produced by a heavy car-truck launched at full speed.

Remark:

☐ **Yes** | ☒ **No** - The trembling of movable objects?

### 2. A large number of people have observed

☐ **Yes** | ☒ **No** - The shock of glasses or crockery placed very close together?

☐ **Yes** | ☒ **No** - The shivering of windows and doors?

☐ **Yes** | ☒ **No** - The creaking of floors?

☐ **Yes** | ☒ **No** - The rustle of ceilings?

☒ **Yes** | ☐ **No** - A loud rumbling sound accompanied the shaking?

☐ **Yes** | ☒ **No** - A number of sleepers woke up?

Note:

### 3

☐ **Yes** | ☒ **No** - The tremor was perceived by people outdoors?

☒ **Yes** | ☐ **No** - Inside the houses, everyone was aware of it due to the shaking of the whole construction?

☒ **Yes** | ☐ **No** - It was as if a heavy vehicle, thrown at full speed, had bumped into the house or a heavy object had overturned in one of the rooms.

☒ **Yes** | ☐ **No** - We swayed with the chairs, beds, etc...

☒ **Yes** | ☐ **No** - Freely suspended objects swayed?

☐ **Yes** | ☒ **No** - Light objects have been moved?

☐ **Yes** | ☒ **No** - Objects placed on top of furniture have fallen down?

☐ **Yes** | ☒ **No** - Doors and windows knocked?

☐ **Yes** | ☒ **No** - Windows broke?

☐ **Yes** | ☒ **No** - All the sleepers woke up?

☐ **Yes** | ☒ **No** - A few frightened people came out of the houses?

Remark:

### 4

☐ **Yes** | ☒ **No** - Frames have fallen off the walls?

☐ **Yes** | ☒ **No** - Dishes have broken?

☐ **Yes** | ☒ **No** - Furniture has been moved?

☐ **Yes** | ☒ **No** - Light furniture has been knocked over?

☐ **Yes** | ☒ **No** - Small fragments of plaster have fallen from ceilings and walls?

☐ **Yes** | ☒ **No** - Large numbers of people have left their homes in a hurry?

☐ **Yes** | ☒ **No** - Some people had the feeling that they were going to fall?

Remark:

### 5. In houses:

☐ **Yes** | ☒ **No** - Heavy pieces of furniture have been knocked over?

☐ **Yes** | ☒ **No** - Plastered ceiling have fallen down?

☐ **Yes** | ☒ **No** - Chimneys have collapsed?

☐ **Yes** | ☒ **No** - Walls were cracked?

☐ **Yes** | ☒ **No** - Landslides have occurred along the banks or embankments.

Remark:

Additional comments:

## Official inquiry for LEERNES (BE)

Location: 50.398°N 4.332°E, at 19.2 km from the epicentre.

**Imin: 4 - Imax: 4**

### 1

☒ **Yes** | ☐ No - A small number of inhabitants, especially those on the upper floors of the houses, noticed a tremor accompanied by a noise comparable to that produced by a heavy car-truck launched at full speed.

Remark:

☒ **Yes** | ☐ No - The trembling of movable objects?

### 2. A large number of people have observed

☒ **Yes** | ☐ No - The shock of glasses or crockery placed very close together?

☒ **Yes** | ☐ No - The shivering of windows and doors?

☐ Yes | ☒ **No** - The creaking of floors?

☐ Yes | ☒ **No** - The rustle of ceilings?

☐ Yes | ☒ **No** - A loud rumbling sound accompanied the shaking?

☐ Yes | ☒ **No** - A number of sleepers woke up?

Note:

### 3

☐ Yes | ☒ **No** - The tremor was perceived by people outdoors?

☐ Yes | ☒ **No** - Inside the houses, everyone was aware of it due to the shaking of the whole construction?

☐ Yes | ☒ **No** - It was as if a heavy vehicle, thrown at full speed, had bumped into the house or a heavy object had overturned in one of the rooms.

☒ **Yes** | ☐ No - We swayed with the chairs, beds, etc...

☐ Yes | ☒ **No** - Freely suspended objects swayed?

☐ Yes | ☒ **No** - Light objects have been moved?

☐ Yes | ☒ **No** - Objects placed on top of furniture have fallen down?

☐ Yes | ☒ **No** - Doors and windows knocked?

☐ Yes | ☒ **No** - Windows broke?

☐ Yes | ☒ **No** - All the sleepers woke up?

☒ **Yes** | ☐ No - A few frightened people came out of the houses?

Remark:

### 4

☐ Yes | ☒ **No** - Frames have fallen off the walls?

☐ Yes | ☒ **No** - Dishes have broken?

☐ Yes | ☒ **No** - Furniture has been moved?

☐ Yes | ☒ **No** - Light furniture has been knocked over?

☐ Yes | ☒ **No** - Small fragments of plaster have fallen from ceilings and walls?

☐ Yes | ☒ **No** - Large numbers of people have left their homes in a hurry?

☐ Yes | ☒ **No** - Some people had the feeling that they were going to fall?

Remark:

### 5. In houses:

☐ Yes | ☒ **No** - Heavy pieces of furniture have been knocked over?

☐ Yes | ☒ **No** - Plastered ceiling have fallen down?

☐ Yes | ☒ **No** - Chimneys have collapsed?

☐ Yes | ☒ **No** - Walls were cracked?

☐ Yes | ☒ **No** - Landslides have occurred along the banks or embankments.

Remark:

Additional comments:

## Official inquiry for LOMBISE (BE)

Location: 50.6°N 3.941°E, at 18.4 km from the epicentre.

**Imin: 4 - Imax: 4**

---

### 1

☐ Yes | ☒ **No** - A small number of inhabitants, especially those on the upper floors of the houses, noticed a tremor accompanied by a noise comparable to that produced by a heavy car-truck launched at full speed.

Remark:

☐ Yes | ☒ **No** - The trembling of movable objects?

### 2. A large number of people have observed

☐ Yes | ☒ **No** - The shock of glasses or crockery placed very close together?

☒ **Yes** | ☐ **No** - The shivering of windows and doors?

☒ **Yes** | ☐ **No** - The creaking of floors?

☒ **Yes** | ☐ **No** - The rustle of ceilings?

☐ Yes | ☒ **No** - A loud rumbling sound accompanied the shaking?

☐ Yes | ☒ **No** - A number of sleepers woke up?

Note:

### 3

☐ Yes | ☒ **No** - The tremor was perceived by people outdoors?

☐ Yes | ☒ **No** - Inside the houses, everyone was aware of it due to the shaking of the whole construction?

☐ Yes | ☒ **No** - It was as if a heavy vehicle, thrown at full speed, had bumped into the house or a heavy object had overturned in one of the rooms.

☒ **Yes** | ☐ **No** - We swayed with the chairs, beds, etc...

☐ Yes | ☒ **No** - Freely suspended objects swayed?

☐ Yes | ☒ **No** - Light objects have been moved?

☐ Yes | ☒ **No** - Objects placed on top of furniture have fallen down?

☒ **Yes** | ☐ **No** - Doors and windows knocked?

☐ Yes | ☒ **No** - Windows broke?

☐ Yes | ☒ **No** - All the sleepers woke up?

☐ Yes | ☒ **No** - A few frightened people came out of the houses?

Remark:

### 4

☐ Yes | ☒ **No** - Frames have fallen off the walls?

☐ Yes | ☒ **No** - Dishes have broken?

☐ Yes | ☒ **No** - Furniture has been moved?

☐ Yes | ☒ **No** - Light furniture has been knocked over?

☐ Yes | ☒ **No** - Small fragments of plaster have fallen from ceilings and walls?

☐ Yes | ☒ **No** - Large numbers of people have left their homes in a hurry?

☐ Yes | ☒ **No** - Some people had the feeling that they were going to fall?

Remark:

### 5. In houses:

☐ Yes | ☒ **No** - Heavy pieces of furniture have been knocked over?

☐ Yes | ☒ **No** - Plastered ceiling have fallen down?

☐ Yes | ☒ **No** - Chimneys have collapsed?

☐ Yes | ☒ **No** - Walls were cracked?

☐ Yes | ☒ **No** - Landslides have occurred along the banks or embankments.

Remark:

Additional comments:

## Official inquiry for MANAGE (BE)

Location: 50.504°N 4.235°E, at 12.1 km from the epicentre.

**Imin: 4 - Imax: 4**

### 1

☒ **Yes** | ☐ **No** - A small number of inhabitants, especially those on the upper floors of the houses, noticed a tremor accompanied by a noise comparable to that produced by a heavy car-truck launched at full speed.

Remark:

☒ **Yes** | ☐ **No** - The trembling of movable objects?

### 2. A large number of people have observed

☒ **Yes** | ☐ **No** - The shock of glasses or crockery placed very close together?

☐ **Yes** | ☒ **No** - The shivering of windows and doors?

☐ **Yes** | ☒ **No** - The creaking of floors?

☐ **Yes** | ☒ **No** - The rustle of ceilings?

☐ **Yes** | ☒ **No** - A loud rumbling sound accompanied the shaking?

☐ **Yes** | ☒ **No** - A number of sleepers woke up?

Note:

### 3

☐ **Yes** | ☒ **No** - The tremor was perceived by people outdoors?

☐ **Yes** | ☒ **No** - Inside the houses, everyone was aware of it due to the shaking of the whole construction?

☐ **Yes** | ☒ **No** - It was as if a heavy vehicle, thrown at full speed, had bumped into the house or a heavy object had overturned in one of the rooms.

☒ **Yes** | ☐ **No** - We swayed with the chairs, beds, etc...

☒ **Yes** | ☐ **No** - Freely suspended objects swayed?

☐ **Yes** | ☒ **No** - Light objects have been moved?

☐ **Yes** | ☒ **No** - Objects placed on top of furniture have fallen down?

☐ **Yes** | ☒ **No** - Doors and windows knocked?

☐ **Yes** | ☒ **No** - Windows broke?

☐ **Yes** | ☒ **No** - All the sleepers woke up?

☐ **Yes** | ☒ **No** - A few frightened people came out of the houses?

Remark:

### 4

☐ **Yes** | ☒ **No** - Frames have fallen off the walls?

☐ **Yes** | ☒ **No** - Dishes have broken?

☐ **Yes** | ☒ **No** - Furniture has been moved?

☐ **Yes** | ☒ **No** - Light furniture has been knocked over?

☐ **Yes** | ☒ **No** - Small fragments of plaster have fallen from ceilings and walls?

☐ **Yes** | ☒ **No** - Large numbers of people have left their homes in a hurry?

☐ **Yes** | ☒ **No** - Some people had the feeling that they were going to fall?

Remark:

### 5. In houses:

☐ **Yes** | ☒ **No** - Heavy pieces of furniture have been knocked over?

☐ **Yes** | ☒ **No** - Plastered ceiling have fallen down?

☐ **Yes** | ☒ **No** - Chimneys have collapsed?

☐ **Yes** | ☒ **No** - Walls were cracked?

☐ **Yes** | ☒ **No** - Landslides have occurred along the banks or embankments.

Remark:

Additional comments:

## Official inquiry for MARCHE-LEZ-ECAUSSINNES (BE)

Location: 50.546°N 4.183°E, at 12.0 km from the epicentre.

**Imin: 3 - Imax: 3**

### 1

☒ **Yes** | ☐ **No** - A small number of inhabitants, especially those on the upper floors of the houses, noticed a tremor accompanied by a noise comparable to that produced by a heavy car-truck launched at full speed.

Remark:

☐ Yes | ☒ **No** - The trembling of movable objects?

### 2. A large number of people have observed

☐ Yes | ☒ **No** - The shock of glasses or crockery placed very close together?

☐ Yes | ☒ **No** - The shivering of windows and doors?

☐ Yes | ☒ **No** - The creaking of floors?

☐ Yes | ☒ **No** - The rustle of ceilings?

☐ Yes | ☒ **No** - A loud rumbling sound accompanied the shaking?

☐ Yes | ☒ **No** - A number of sleepers woke up?

Note:

### 3

☐ Yes | ☒ **No** - The tremor was perceived by people outdoors?

☐ Yes | ☒ **No** - Inside the houses, everyone was aware of it due to the shaking of the whole construction?

☐ Yes | ☒ **No** - It was as if a heavy vehicle, thrown at full speed, had bumped into the house or a heavy object had overturned in one of the rooms.

☐ Yes | ☒ **No** - We swayed with the chairs, beds, etc...

☐ Yes | ☒ **No** - Freely suspended objects swayed?

☐ Yes | ☒ **No** - Light objects have been moved?

☐ Yes | ☒ **No** - Objects placed on top of furniture have fallen down?

☐ Yes | ☒ **No** - Doors and windows knocked?

☐ Yes | ☒ **No** - Windows broke?

☐ Yes | ☒ **No** - All the sleepers woke up?

☐ Yes | ☒ **No** - A few frightened people came out of the houses?

Remark:

### 4

☐ Yes | ☒ **No** - Frames have fallen off the walls?

☐ Yes | ☒ **No** - Dishes have broken?

☐ Yes | ☒ **No** - Furniture has been moved?

☐ Yes | ☒ **No** - Light furniture has been knocked over?

☐ Yes | ☒ **No** - Small fragments of plaster have fallen from ceilings and walls?

☐ Yes | ☒ **No** - Large numbers of people have left their homes in a hurry?

☐ Yes | ☒ **No** - Some people had the feeling that they were going to fall?

Remark:

### 5. In houses:

☐ Yes | ☒ **No** - Heavy pieces of furniture have been knocked over?

☐ Yes | ☒ **No** - Plastered ceiling have fallen down?

☐ Yes | ☒ **No** - Chimneys have collapsed?

☐ Yes | ☒ **No** - Walls were cracked?

☐ Yes | ☒ **No** - Landslides have occurred along the banks or embankments.

Remark:

Additional comments:

## Official inquiry for MARCHIENNE-AU-PONT (BE)

Location: 50.407°N 4.396°E, at 23.2 km from the epicentre.

Imin: 2 - Imax: 2

### 1

☒ **Yes** | ☐ **No** - A small number of inhabitants, especially those on the upper floors of the houses, noticed a tremor accompanied by a noise comparable to that produced by a heavy car-truck launched at full speed.

Remark: **. Un petit nombre d'habitants, particulièrement ceux qui se trouvaient aux étages supérieurs des maisons, ont remarqué un ébranlement.**

☐ Yes | ☒ **No** - The trembling of movable objects?

### 2. A large number of people have observed

☐ Yes | ☒ **No** - The shock of glasses or crockery placed very close together?

☐ Yes | ☒ **No** - The shivering of windows and doors?

☐ Yes | ☒ **No** - The creaking of floors?

☐ Yes | ☒ **No** - The rustle of ceilings?

☐ Yes | ☒ **No** - A loud rumbling sound accompanied the shaking?

☐ Yes | ☒ **No** - A number of sleepers woke up?

Note:

### 3

☐ Yes | ☒ **No** - The tremor was perceived by people outdoors?

☐ Yes | ☒ **No** - Inside the houses, everyone was aware of it due to the shaking of the whole construction?

☐ Yes | ☒ **No** - It was as if a heavy vehicle, thrown at full speed, had bumped into the house or a heavy object had overturned in one of the rooms.

☐ Yes | ☒ **No** - We swayed with the chairs, beds, etc...

☐ Yes | ☒ **No** - Freely suspended objects swayed?

☐ Yes | ☒ **No** - Light objects have been moved?

☐ Yes | ☒ **No** - Objects placed on top of furniture have fallen down?

☐ Yes | ☒ **No** - Doors and windows knocked?

☐ Yes | ☒ **No** - Windows broke?

☐ Yes | ☒ **No** - All the sleepers woke up?

☐ Yes | ☒ **No** - A few frightened people came out of the houses?

Remark:

### 4

☐ Yes | ☒ **No** - Frames have fallen off the walls?

☐ Yes | ☒ **No** - Dishes have broken?

☐ Yes | ☒ **No** - Furniture has been moved?

☐ Yes | ☒ **No** - Light furniture has been knocked over?

☐ Yes | ☒ **No** - Small fragments of plaster have fallen from ceilings and walls?

☐ Yes | ☒ **No** - Large numbers of people have left their homes in a hurry?

☐ Yes | ☒ **No** - Some people had the feeling that they were going to fall?

Remark:

### 5. In houses:

☐ Yes | ☒ **No** - Heavy pieces of furniture have been knocked over?

☐ Yes | ☒ **No** - Plastered ceiling have fallen down?

☐ Yes | ☒ **No** - Chimneys have collapsed?

☐ Yes | ☒ **No** - Walls were cracked?

☐ Yes | ☒ **No** - Landslides have occurred along the banks or embankments.

Remark:

Additional comments:

## Official inquiry for MASNUY-SAINT-PIERRE (BE)

Location: 50.537°N 3.959°E, at 12.1 km from the epicentre.

**Imin: 4 - Imax: 4**

### 1

☒ **Yes** | ☐ **No** - A small number of inhabitants, especially those on the upper floors of the houses, noticed a tremor accompanied by a noise comparable to that produced by a heavy car-truck launched at full speed.

Remark:

☒ **Yes** | ☐ **No** - The trembling of movable objects?

### 2. A large number of people have observed

☐ **Yes** | ☒ **No** - The shock of glasses or crockery placed very close together?

☐ **Yes** | ☒ **No** - The shivering of windows and doors?

☐ **Yes** | ☒ **No** - The creaking of floors?

☐ **Yes** | ☒ **No** - The rustle of ceilings?

☒ **Yes** | ☐ **No** - A loud rumbling sound accompanied the shaking?

☐ **Yes** | ☒ **No** - A number of sleepers woke up?

Note:

### 3

☐ **Yes** | ☒ **No** - The tremor was perceived by people outdoors?

☐ **Yes** | ☒ **No** - Inside the houses, everyone was aware of it due to the shaking of the whole construction?

☒ **Yes** | ☐ **No** - It was as if a heavy vehicle, thrown at full speed, had bumped into the house or a heavy object had overturned in one of the rooms.

☒ **Yes** | ☐ **No** - We swayed with the chairs, beds, etc...

☒ **Yes** | ☐ **No** - Freely suspended objects swayed?

☐ **Yes** | ☒ **No** - Light objects have been moved?

☐ **Yes** | ☒ **No** - Objects placed on top of furniture have fallen down?

☐ **Yes** | ☒ **No** - Doors and windows knocked?

☐ **Yes** | ☒ **No** - Windows broke?

☐ **Yes** | ☒ **No** - All the sleepers woke up?

☐ **Yes** | ☒ **No** - A few frightened people came out of the houses?

Remark:

### 4

☐ **Yes** | ☒ **No** - Frames have fallen off the walls?

☐ **Yes** | ☒ **No** - Dishes have broken?

☐ **Yes** | ☒ **No** - Furniture has been moved?

☐ **Yes** | ☒ **No** - Light furniture has been knocked over?

☐ **Yes** | ☒ **No** - Small fragments of plaster have fallen from ceilings and walls?

☐ **Yes** | ☒ **No** - Large numbers of people have left their homes in a hurry?

☐ **Yes** | ☒ **No** - Some people had the feeling that they were going to fall?

Remark:

### 5. In houses:

☐ **Yes** | ☒ **No** - Heavy pieces of furniture have been knocked over?

☐ **Yes** | ☒ **No** - Plastered ceiling have fallen down?

☐ **Yes** | ☒ **No** - Chimneys have collapsed?

☐ **Yes** | ☒ **No** - Walls were cracked?

☐ **Yes** | ☒ **No** - Landslides have occurred along the banks or embankments.

Remark:

Additional comments:

## Official inquiry for MAURAGE (BE)

Location: 50.456°N 4.102°E, at 1.7 km from the epicentre.

**Imin: 6 - Imax: 6**

### 1

☐ Yes | ☒ **No** - A small number of inhabitants, especially those on the upper floors of the houses, noticed a tremor accompanied by a noise comparable to that produced by a heavy car-truck launched at full speed.

Remark:

☐ Yes | ☒ **No** - The trembling of movable objects?

### 2. A large number of people have observed

☐ Yes | ☒ **No** - The shock of glasses or crockery placed very close together?

☐ Yes | ☒ **No** - The shivering of windows and doors?

☐ Yes | ☒ **No** - The creaking of floors?

☐ Yes | ☒ **No** - The rustle of ceilings?

☐ Yes | ☒ **No** - A loud rumbling sound accompanied the shaking?

☐ Yes | ☒ **No** - A number of sleepers woke up?

Note:

### 3

☒ **Yes** | ☐ No - The tremor was perceived by people outdoors?

☒ **Yes** | ☐ No - Inside the houses, everyone was aware of it due to the shaking of the whole construction?

☒ **Yes** | ☐ No - It was as if a heavy vehicle, thrown at full speed, had bumped into the house or a heavy object had overturned in one of the rooms.

☒ **Yes** | ☐ No - We swayed with the chairs, beds, etc...

☒ **Yes** | ☐ No - Freely suspended objects swayed?

☒ **Yes** | ☐ No - Light objects have been moved?

☒ **Yes** | ☐ No - Objects placed on top of furniture have fallen down?

☒ **Yes** | ☐ No - Doors and windows knocked?

☒ **Yes** | ☐ No - Windows broke?

☒ **Yes** | ☐ No - All the sleepers woke up?

☒ **Yes** | ☐ No - A few frightened people came out of the houses?

Remark:

### 4

☒ **Yes** | ☐ No - Frames have fallen off the walls?

☒ **Yes** | ☐ No - Dishes have broken?

☒ **Yes** | ☐ No - Furniture has been moved?

☒ **Yes** | ☐ No - Light furniture has been knocked over?

☒ **Yes** | ☐ No - Small fragments of plaster have fallen from ceilings and walls?

☒ **Yes** | ☐ No - Large numbers of people have left their homes in a hurry?

☒ **Yes** | ☐ No - Some people had the feeling that they were going to fall?

Remark:

### 5. In houses:

☒ **Yes** | ☐ No - Heavy pieces of furniture have been knocked over?

☒ **Yes** | ☐ No - Plastered ceiling have fallen down?

☒ **Yes** | ☐ No - Chimneys have collapsed?

☒ **Yes** | ☐ No - Walls were cracked?

☒ **Yes** | ☐ No - Landslides have occurred along the banks or embankments.

Remark:

Additional comments: **la secousse la plus importante a eu lieu à 13H33. d'autre secousse ont été constatées également la nuit suivante vers : 22H35, 2H15 et 4H30**

## Official inquiry for MERBES-LE-CHATEAU (BE)

Location: 50.324°N 4.165°E, at 16.3 km from the epicentre.

**Imin: 3 - Imax: 3**

---

### 1

☐ Yes | ☒ **No** - A small number of inhabitants, especially those on the upper floors of the houses, noticed a tremor accompanied by a noise comparable to that produced by a heavy car-truck launched at full speed.

Remark:

☐ Yes | ☒ **No** - The trembling of movable objects?

### 2. A large number of people have observed

☐ Yes | ☒ **No** - The shock of glasses or crockery placed very close together?

☐ Yes | ☒ **No** - The shivering of windows and doors?

☐ Yes | ☒ **No** - The creaking of floors?

☐ Yes | ☒ **No** - The rustle of ceilings?

☐ Yes | ☒ **No** - A loud rumbling sound accompanied the shaking?

☐ Yes | ☒ **No** - A number of sleepers woke up?

Note:

### 3

☐ Yes | ☒ **No** - The tremor was perceived by people outdoors?

☐ Yes | ☒ **No** - Inside the houses, everyone was aware of it due to the shaking of the whole construction?

☐ Yes | ☒ **No** - It was as if a heavy vehicle, thrown at full speed, had bumped into the house or a heavy object had overturned in one of the rooms.

☒ **Yes** | ☐ **No** - We swayed with the chairs, beds, etc...

☐ Yes | ☒ **No** - Freely suspended objects swayed?

☐ Yes | ☒ **No** - Light objects have been moved?

☐ Yes | ☒ **No** - Objects placed on top of furniture have fallen down?

☐ Yes | ☒ **No** - Doors and windows knocked?

☐ Yes | ☒ **No** - Windows broke?

☐ Yes | ☒ **No** - All the sleepers woke up?

☐ Yes | ☒ **No** - A few frightened people came out of the houses?

Remark:

### 4

☐ Yes | ☒ **No** - Frames have fallen off the walls?

☐ Yes | ☒ **No** - Dishes have broken?

☐ Yes | ☒ **No** - Furniture has been moved?

☐ Yes | ☒ **No** - Light furniture has been knocked over?

☐ Yes | ☒ **No** - Small fragments of plaster have fallen from ceilings and walls?

☐ Yes | ☒ **No** - Large numbers of people have left their homes in a hurry?

☐ Yes | ☒ **No** - Some people had the feeling that they were going to fall?

Remark:

### 5. In houses:

☐ Yes | ☒ **No** - Heavy pieces of furniture have been knocked over?

☐ Yes | ☒ **No** - Plastered ceiling have fallen down?

☐ Yes | ☒ **No** - Chimneys have collapsed?

☐ Yes | ☒ **No** - Walls were cracked?

☐ Yes | ☒ **No** - Landslides have occurred along the banks or embankments.

Remark:

Additional comments:

## Official inquiry for MERBES-SAINTE-MARIE (BE)

Location: 50.355°N 4.172°E, at 13.4 km from the epicentre.

**Imin: 4 - Imax: 4**

### 1

☒ **Yes** | ☐ **No** - A small number of inhabitants, especially those on the upper floors of the houses, noticed a tremor accompanied by a noise comparable to that produced by a heavy car-truck launched at full speed.

Remark:

☒ **Yes** | ☐ **No** - The trembling of movable objects?

### 2. A large number of people have observed

☐ **Yes** | ☒ **No** - The shock of glasses or crockery placed very close together?

☐ **Yes** | ☒ **No** - The shivering of windows and doors?

☐ **Yes** | ☒ **No** - The creaking of floors?

☐ **Yes** | ☒ **No** - The rustle of ceilings?

☐ **Yes** | ☒ **No** - A loud rumbling sound accompanied the shaking?

☐ **Yes** | ☒ **No** - A number of sleepers woke up?

Note:

### 3

☐ **Yes** | ☒ **No** - The tremor was perceived by people outdoors?

☒ **Yes** | ☐ **No** - Inside the houses, everyone was aware of it due to the shaking of the whole construction?

☐ **Yes** | ☒ **No** - It was as if a heavy vehicle, thrown at full speed, had bumped into the house or a heavy object had overturned in one of the rooms.

☐ **Yes** | ☒ **No** - We swayed with the chairs, beds, etc...

☐ **Yes** | ☒ **No** - Freely suspended objects swayed?

☐ **Yes** | ☒ **No** - Light objects have been moved?

☐ **Yes** | ☒ **No** - Objects placed on top of furniture have fallen down?

☐ **Yes** | ☒ **No** - Doors and windows knocked?

☐ **Yes** | ☒ **No** - Windows broke?

☐ **Yes** | ☒ **No** - All the sleepers woke up?

☐ **Yes** | ☒ **No** - A few frightened people came out of the houses?

Remark:

### 4

☐ **Yes** | ☒ **No** - Frames have fallen off the walls?

☐ **Yes** | ☒ **No** - Dishes have broken?

☐ **Yes** | ☒ **No** - Furniture has been moved?

☐ **Yes** | ☒ **No** - Light furniture has been knocked over?

☐ **Yes** | ☒ **No** - Small fragments of plaster have fallen from ceilings and walls?

☐ **Yes** | ☒ **No** - Large numbers of people have left their homes in a hurry?

☐ **Yes** | ☒ **No** - Some people had the feeling that they were going to fall?

Remark:

### 5. In houses:

☐ **Yes** | ☒ **No** - Heavy pieces of furniture have been knocked over?

☐ **Yes** | ☒ **No** - Plastered ceiling have fallen down?

☐ **Yes** | ☒ **No** - Chimneys have collapsed?

☐ **Yes** | ☒ **No** - Walls were cracked?

☐ **Yes** | ☒ **No** - Landslides have occurred along the banks or embankments.

Remark:

Additional comments:

## Official inquiry for MESLIN-L'EVEQUE (BE)

Location: 50.649°N 3.848°E, at 26.7 km from the epicentre.

**Imin: 3 - Imax: 3**

### 1

☒ **Yes** | ☐ **No** - A small number of inhabitants, especially those on the upper floors of the houses, noticed a tremor accompanied by a noise comparable to that produced by a heavy car-truck launched at full speed.

Remark:

☐ Yes | ☒ **No** - The trembling of movable objects?

### 2. A large number of people have observed

☐ Yes | ☒ **No** - The shock of glasses or crockery placed very close together?

☐ Yes | ☒ **No** - The shivering of windows and doors?

☐ Yes | ☒ **No** - The creaking of floors?

☐ Yes | ☒ **No** - The rustle of ceilings?

☐ Yes | ☒ **No** - A loud rumbling sound accompanied the shaking?

☐ Yes | ☒ **No** - A number of sleepers woke up?

Note:

### 3

☐ Yes | ☒ **No** - The tremor was perceived by people outdoors?

☐ Yes | ☒ **No** - Inside the houses, everyone was aware of it due to the shaking of the whole construction?

☐ Yes | ☒ **No** - It was as if a heavy vehicle, thrown at full speed, had bumped into the house or a heavy object had overturned in one of the rooms.

☐ Yes | ☒ **No** - We swayed with the chairs, beds, etc...

☐ Yes | ☒ **No** - Freely suspended objects swayed?

☐ Yes | ☒ **No** - Light objects have been moved?

☐ Yes | ☒ **No** - Objects placed on top of furniture have fallen down?

☐ Yes | ☒ **No** - Doors and windows knocked?

☐ Yes | ☒ **No** - Windows broke?

☐ Yes | ☒ **No** - All the sleepers woke up?

☐ Yes | ☒ **No** - A few frightened people came out of the houses?

Remark:

### 4

☐ Yes | ☒ **No** - Frames have fallen off the walls?

☐ Yes | ☒ **No** - Dishes have broken?

☐ Yes | ☒ **No** - Furniture has been moved?

☐ Yes | ☒ **No** - Light furniture has been knocked over?

☐ Yes | ☒ **No** - Small fragments of plaster have fallen from ceilings and walls?

☐ Yes | ☒ **No** - Large numbers of people have left their homes in a hurry?

☐ Yes | ☒ **No** - Some people had the feeling that they were going to fall?

Remark:

### 5. In houses:

☐ Yes | ☒ **No** - Heavy pieces of furniture have been knocked over?

☐ Yes | ☒ **No** - Plastered ceiling have fallen down?

☐ Yes | ☒ **No** - Chimneys have collapsed?

☐ Yes | ☒ **No** - Walls were cracked?

☐ Yes | ☒ **No** - Landslides have occurred along the banks or embankments.

Remark:

Additional comments:

## Official inquiry for MESVIN (BE)

Location: 50.427°N 3.961°E, at 9.2 km from the epicentre.

**Imin: 5 - Imax: 6**

---

### 1

☒ **Yes** | ☐ No - A small number of inhabitants, especially those on the upper floors of the houses, noticed a tremor accompanied by a noise comparable to that produced by a heavy car-truck launched at full speed.

Remark:

☒ **Yes** | ☐ No - The trembling of movable objects?

### 2. A large number of people have observed

☒ **Yes** | ☐ No - The shock of glasses or crockery placed very close together?

☒ **Yes** | ☐ No - The shivering of windows and doors?

☒ **Yes** | ☐ No - The creaking of floors?

☒ **Yes** | ☐ No - The rustle of ceilings?

☒ **Yes** | ☐ No - A loud rumbling sound accompanied the shaking?

☒ **Yes** | ☐ No - A number of sleepers woke up?

Note:

### 3

☐ Yes | ☒ **No** - The tremor was perceived by people outdoors?

☒ **Yes** | ☐ No - Inside the houses, everyone was aware of it due to the shaking of the whole construction?

☒ **Yes** | ☐ No - It was as if a heavy vehicle, thrown at full speed, had bumped into the house or a heavy object had overturned in one of the rooms.

☒ **Yes** | ☐ No - We swayed with the chairs, beds, etc...

☒ **Yes** | ☐ No - Freely suspended objects swayed?

☒ **Yes** | ☐ No - Light objects have been moved?

☒ **Yes** | ☐ No - Objects placed on top of furniture have fallen down?

☒ **Yes** | ☐ No - Doors and windows knocked?

☒ **Yes** | ☐ No - Windows broke?

☒ **Yes** | ☐ No - All the sleepers woke up?

☒ **Yes** | ☐ No - A few frightened people came out of the houses?

Remark:

### 4

☒ **Yes** | ☐ No - Frames have fallen off the walls?

☒ **Yes** | ☐ No - Dishes have broken?

☒ **Yes** | ☐ No - Furniture has been moved?

☒ **Yes** | ☐ No - Light furniture has been knocked over?

☐ Yes | ☒ **No** - Small fragments of plaster have fallen from ceilings and walls?

☒ **Yes** | ☐ No - Large numbers of people have left their homes in a hurry?

☒ **Yes** | ☐ No - Some people had the feeling that they were going to fall?

Remark:

### 5. In houses:

☐ Yes | ☒ **No** - Heavy pieces of furniture have been knocked over?

☐ Yes | ☒ **No** - Plastered ceiling have fallen down?

☒ **Yes** | ☐ No - Chimneys have collapsed?

☒ **Yes** | ☐ No - Walls were cracked?

☒ **Yes** | ☐ No - Landslides have occurred along the banks or embankments.

Remark:

Additional comments:

## Official inquiry for MIGNAULT (BE)

Location: 50.529°N 4.154°E, at 9.3 km from the epicentre.

Imin: 3 - Imax: 3

### 1

☒ **Yes** | ☐ **No** - A small number of inhabitants, especially those on the upper floors of the houses, noticed a tremor accompanied by a noise comparable to that produced by a heavy car-truck launched at full speed.

Remark: **Un petit nombre d'habitants ont remarqué un ébranlement accompagné d'un bruit comparables à celui que produit un lourd auto-camion lancé à toute vitesse**

☐ Yes | ☒ **No** - The trembling of movable objects?

### 2. A large number of people have observed

☐ Yes | ☒ **No** - The shock of glasses or crockery placed very close together?

☐ Yes | ☒ **No** - The shivering of windows and doors?

☐ Yes | ☒ **No** - The creaking of floors?

☐ Yes | ☒ **No** - The rustle of ceilings?

☒ **Yes** | ☐ **No** - A loud rumbling sound accompanied the shaking?

☐ Yes | ☒ **No** - A number of sleepers woke up?

Note:

### 3

☒ **Yes** | ☐ **No** - The tremor was perceived by people outdoors?

☒ **Yes** | ☐ **No** - Inside the houses, everyone was aware of it due to the shaking of the whole construction?

☒ **Yes** | ☐ **No** - It was as if a heavy vehicle, thrown at full speed, had bumped into the house or a heavy object had overturned in one of the rooms.

☐ Yes | ☒ **No** - We swayed with the chairs, beds, etc...

☐ Yes | ☒ **No** - Freely suspended objects swayed?

☐ Yes | ☒ **No** - Light objects have been moved?

☐ Yes | ☒ **No** - Objects placed on top of furniture have fallen down?

☐ Yes | ☒ **No** - Doors and windows knocked?

☐ Yes | ☒ **No** - Windows broke?

☐ Yes | ☒ **No** - All the sleepers woke up?

☐ Yes | ☒ **No** - A few frightened people came out of the houses?

Remark:

### 4

☐ Yes | ☒ **No** - Frames have fallen off the walls?

☐ Yes | ☒ **No** - Dishes have broken?

☐ Yes | ☒ **No** - Furniture has been moved?

☐ Yes | ☒ **No** - Light furniture has been knocked over?

☐ Yes | ☒ **No** - Small fragments of plaster have fallen from ceilings and walls?

☐ Yes | ☒ **No** - Large numbers of people have left their homes in a hurry?

☐ Yes | ☒ **No** - Some people had the feeling that they were going to fall?

Remark:

### 5. In houses:

☐ Yes | ☒ **No** - Heavy pieces of furniture have been knocked over?

☐ Yes | ☒ **No** - Plastered ceiling have fallen down?

☐ Yes | ☒ **No** - Chimneys have collapsed?

☐ Yes | ☒ **No** - Walls were cracked?

☐ Yes | ☒ **No** - Landslides have occurred along the banks or embankments.

Remark:

Additional comments:

## Official inquiry for MONCEAU-SUR-SAMBRE (BE)

Location: 50.411°N 4.382°E, at 22.1 km from the epicentre.

**Imin: 3 - Imax: 3**

---

### 1

☒ **Yes** | ☐ **No** - A small number of inhabitants, especially those on the upper floors of the houses, noticed a tremor accompanied by a noise comparable to that produced by a heavy car-truck launched at full speed.

Remark:

☐ Yes | ☒ **No** - The trembling of movable objects?

### 2. A large number of people have observed

☐ Yes | ☒ **No** - The shock of glasses or crockery placed very close together?

☐ Yes | ☒ **No** - The shivering of windows and doors?

☐ Yes | ☒ **No** - The creaking of floors?

☐ Yes | ☒ **No** - The rustle of ceilings?

☐ Yes | ☒ **No** - A loud rumbling sound accompanied the shaking?

☐ Yes | ☒ **No** - A number of sleepers woke up?

Note:

### 3

☐ Yes | ☒ **No** - The tremor was perceived by people outdoors?

☐ Yes | ☒ **No** - Inside the houses, everyone was aware of it due to the shaking of the whole construction?

☐ Yes | ☒ **No** - It was as if a heavy vehicle, thrown at full speed, had bumped into the house or a heavy object had overturned in one of the rooms.

☐ Yes | ☒ **No** - We swayed with the chairs, beds, etc...

☐ Yes | ☒ **No** - Freely suspended objects swayed?

☐ Yes | ☒ **No** - Light objects have been moved?

☐ Yes | ☒ **No** - Objects placed on top of furniture have fallen down?

☐ Yes | ☒ **No** - Doors and windows knocked?

☐ Yes | ☒ **No** - Windows broke?

☐ Yes | ☒ **No** - All the sleepers woke up?

☐ Yes | ☒ **No** - A few frightened people came out of the houses?

Remark:

### 4

☐ Yes | ☒ **No** - Frames have fallen off the walls?

☐ Yes | ☒ **No** - Dishes have broken?

☐ Yes | ☒ **No** - Furniture has been moved?

☐ Yes | ☒ **No** - Light furniture has been knocked over?

☐ Yes | ☒ **No** - Small fragments of plaster have fallen from ceilings and walls?

☐ Yes | ☒ **No** - Large numbers of people have left their homes in a hurry?

☐ Yes | ☒ **No** - Some people had the feeling that they were going to fall?

Remark:

### 5. In houses:

☐ Yes | ☒ **No** - Heavy pieces of furniture have been knocked over?

☐ Yes | ☒ **No** - Plastered ceiling have fallen down?

☐ Yes | ☒ **No** - Chimneys have collapsed?

☐ Yes | ☒ **No** - Walls were cracked?

☐ Yes | ☒ **No** - Landslides have occurred along the banks or embankments.

Remark:

Additional comments:

## Official inquiry for MONS (BE)

Location: 50.455°N 3.948°E, at 9.4 km from the epicentre.

Imin: 5 - Imax: 5

### 1

☒ **Yes** | ☐ No - A small number of inhabitants, especially those on the upper floors of the houses, noticed a tremor accompanied by a noise comparable to that produced by a heavy car-truck launched at full speed.

Remark: **un ébranlement accompagné d'un bruit comparables à celui que produit un lourd auto-camion lancé à toute vitesse.**

☐ Yes | ☒ **No** - The trembling of movable objects?

### 2. A large number of people have observed

☒ **Yes** | ☐ No - The shock of glasses or crockery placed very close together?

☒ **Yes** | ☐ No - The shivering of windows and doors?

☐ Yes | ☒ **No** - The creaking of floors?

☐ Yes | ☒ **No** - The rustle of ceilings?

☒ **Yes** | ☐ No - A loud rumbling sound accompanied the shaking?

☐ Yes | ☒ **No** - A number of sleepers woke up?

Note:

### 3

☒ **Yes** | ☐ No - The tremor was perceived by people outdoors?

☒ **Yes** | ☐ No - Inside the houses, everyone was aware of it due to the shaking of the whole construction?

☐ Yes | ☒ **No** - It was as if a heavy vehicle, thrown at full speed, had bumped into the house or a heavy object had overturned in one of the rooms.

☒ **Yes** | ☐ No - We swayed with the chairs, beds, etc...

☒ **Yes** | ☐ No - Freely suspended objects swayed?

☐ Yes | ☒ **No** - Light objects have been moved?

☐ Yes | ☒ **No** - Objects placed on top of furniture have fallen down?

☒ **Yes** | ☐ No - Doors and windows knocked?

☐ Yes | ☒ **No** - Windows broke?

☐ Yes | ☒ **No** - All the sleepers woke up?

☒ **Yes** | ☐ No - A few frightened people came out of the houses?

Remark: **De nombreuses personnes effrayées sont sorties des habitations?**

### 4

☐ Yes | ☒ **No** - Frames have fallen off the walls?

☐ Yes | ☒ **No** - Dishes have broken?

☐ Yes | ☒ **No** - Furniture has been moved?

☐ Yes | ☒ **No** - Light furniture has been knocked over?

☐ Yes | ☒ **No** - Small fragments of plaster have fallen from ceilings and walls?

☐ Yes | ☒ **No** - Large numbers of people have left their homes in a hurry?

☐ Yes | ☒ **No** - Some people had the feeling that they were going to fall?

Remark:

### 5. In houses:

☐ Yes | ☒ **No** - Heavy pieces of furniture have been knocked over?

☐ Yes | ☒ **No** - Plastered ceiling have fallen down?

☒ **Yes** | ☐ No - Chimneys have collapsed?

☐ Yes | ☒ **No** - Walls were cracked?

☐ Yes | ☒ **No** - Landslides have occurred along the banks or embankments.

Remark:

Additional comments:

## Official inquiry for MONSTREUX (BE)

Location: 50.599°N 4.289°E, at 21.4 km from the epicentre.

**Imin: 2 - Imax: 3**

### 1

☐ Yes | ☒ **No** - A small number of inhabitants, especially those on the upper floors of the houses, noticed a tremor accompanied by a noise comparable to that produced by a heavy car-truck launched at full speed.

Remark:

☐ Yes | ☒ **No** - The trembling of movable objects?

### 2. A large number of people have observed

☐ Yes | ☒ **No** - The shock of glasses or crockery placed very close together?

☐ Yes | ☒ **No** - The shivering of windows and doors?

☐ Yes | ☒ **No** - The creaking of floors?

☐ Yes | ☒ **No** - The rustle of ceilings?

☐ Yes | ☒ **No** - A loud rumbling sound accompanied the shaking?

☐ Yes | ☒ **No** - A number of sleepers woke up?

Note:

### 3

☐ Yes | ☒ **No** - The tremor was perceived by people outdoors?

☒ **Yes** | ☐ **No** - Inside the houses, everyone was aware of it due to the shaking of the whole construction?

☐ Yes | ☒ **No** - It was as if a heavy vehicle, thrown at full speed, had bumped into the house or a heavy object had overturned in one of the rooms.

☐ Yes | ☒ **No** - We swayed with the chairs, beds, etc...

☐ Yes | ☒ **No** - Freely suspended objects swayed?

☐ Yes | ☒ **No** - Light objects have been moved?

☐ Yes | ☒ **No** - Objects placed on top of furniture have fallen down?

☐ Yes | ☒ **No** - Doors and windows knocked?

☐ Yes | ☒ **No** - Windows broke?

☐ Yes | ☒ **No** - All the sleepers woke up?

☐ Yes | ☒ **No** - A few frightened people came out of the houses?

Remark:

### 4

☐ Yes | ☒ **No** - Frames have fallen off the walls?

☐ Yes | ☒ **No** - Dishes have broken?

☐ Yes | ☒ **No** - Furniture has been moved?

☐ Yes | ☒ **No** - Light furniture has been knocked over?

☐ Yes | ☒ **No** - Small fragments of plaster have fallen from ceilings and walls?

☐ Yes | ☒ **No** - Large numbers of people have left their homes in a hurry?

☐ Yes | ☒ **No** - Some people had the feeling that they were going to fall?

Remark:

### 5. In houses:

☐ Yes | ☒ **No** - Heavy pieces of furniture have been knocked over?

☐ Yes | ☒ **No** - Plastered ceiling have fallen down?

☐ Yes | ☒ **No** - Chimneys have collapsed?

☐ Yes | ☒ **No** - Walls were cracked?

☐ Yes | ☒ **No** - Landslides have occurred along the banks or embankments.

Remark:

Additional comments: **Constatations faites dans quelques habitations seulement se trouvant au sud de Monstreux. Ailleurs néant.**

## Official inquiry for MONT-SAINTE-ALDEGONDE (BE)

Location: 50.429°N 4.233°E, at 11.4 km from the epicentre.

**Imin: 3 - Imax: 3**

### 1

☒ **Yes** | ☐ **No** - A small number of inhabitants, especially those on the upper floors of the houses, noticed a tremor accompanied by a noise comparable to that produced by a heavy car-truck launched at full speed.

Remark:

☐ **Yes** | ☒ **No** - The trembling of movable objects?

### 2. A large number of people have observed

☐ **Yes** | ☒ **No** - The shock of glasses or crockery placed very close together?

☐ **Yes** | ☒ **No** - The shivering of windows and doors?

☐ **Yes** | ☒ **No** - The creaking of floors?

☐ **Yes** | ☒ **No** - The rustle of ceilings?

☐ **Yes** | ☒ **No** - A loud rumbling sound accompanied the shaking?

☐ **Yes** | ☒ **No** - A number of sleepers woke up?

Note:

### 3

☐ **Yes** | ☒ **No** - The tremor was perceived by people outdoors?

☒ **Yes** | ☐ **No** - Inside the houses, everyone was aware of it due to the shaking of the whole construction?

☐ **Yes** | ☒ **No** - It was as if a heavy vehicle, thrown at full speed, had bumped into the house or a heavy object had overturned in one of the rooms.

☐ **Yes** | ☒ **No** - We swayed with the chairs, beds, etc...

☐ **Yes** | ☒ **No** - Freely suspended objects swayed?

☐ **Yes** | ☒ **No** - Light objects have been moved?

☐ **Yes** | ☒ **No** - Objects placed on top of furniture have fallen down?

☐ **Yes** | ☒ **No** - Doors and windows knocked?

☐ **Yes** | ☒ **No** - Windows broke?

☐ **Yes** | ☒ **No** - All the sleepers woke up?

☐ **Yes** | ☒ **No** - A few frightened people came out of the houses?

Remark:

### 4

☐ **Yes** | ☒ **No** - Frames have fallen off the walls?

☐ **Yes** | ☒ **No** - Dishes have broken?

☐ **Yes** | ☒ **No** - Furniture has been moved?

☐ **Yes** | ☒ **No** - Light furniture has been knocked over?

☐ **Yes** | ☒ **No** - Small fragments of plaster have fallen from ceilings and walls?

☐ **Yes** | ☒ **No** - Large numbers of people have left their homes in a hurry?

☐ **Yes** | ☒ **No** - Some people had the feeling that they were going to fall?

Remark:

### 5. In houses:

☐ **Yes** | ☒ **No** - Heavy pieces of furniture have been knocked over?

☐ **Yes** | ☒ **No** - Plastered ceiling have fallen down?

☐ **Yes** | ☒ **No** - Chimneys have collapsed?

☐ **Yes** | ☒ **No** - Walls were cracked?

☐ **Yes** | ☒ **No** - Landslides have occurred along the banks or embankments.

Remark:

Additional comments:

## Official inquiry for MONT-SAINTE-GENEVIEVE (BE)

Location: 50.375°N 4.234°E, at 14.5 km from the epicentre.

**Imin: 2 - Imax: 2**

### 1

☒ **Yes** | ☐ **No** - A small number of inhabitants, especially those on the upper floors of the houses, noticed a tremor accompanied by a noise comparable to that produced by a heavy car-truck launched at full speed.

Remark:

☐ Yes | ☒ **No** - The trembling of movable objects?

### 2. A large number of people have observed

☐ Yes | ☒ **No** - The shock of glasses or crockery placed very close together?

☐ Yes | ☒ **No** - The shivering of windows and doors?

☐ Yes | ☒ **No** - The creaking of floors?

☐ Yes | ☒ **No** - The rustle of ceilings?

☐ Yes | ☒ **No** - A loud rumbling sound accompanied the shaking?

☐ Yes | ☒ **No** - A number of sleepers woke up?

Note:

### 3

☐ Yes | ☒ **No** - The tremor was perceived by people outdoors?

☐ Yes | ☒ **No** - Inside the houses, everyone was aware of it due to the shaking of the whole construction?

☐ Yes | ☒ **No** - It was as if a heavy vehicle, thrown at full speed, had bumped into the house or a heavy object had overturned in one of the rooms.

☐ Yes | ☒ **No** - We swayed with the chairs, beds, etc...

☐ Yes | ☒ **No** - Freely suspended objects swayed?

☐ Yes | ☒ **No** - Light objects have been moved?

☐ Yes | ☒ **No** - Objects placed on top of furniture have fallen down?

☐ Yes | ☒ **No** - Doors and windows knocked?

☐ Yes | ☒ **No** - Windows broke?

☐ Yes | ☒ **No** - All the sleepers woke up?

☐ Yes | ☒ **No** - A few frightened people came out of the houses?

Remark:

### 4

☐ Yes | ☒ **No** - Frames have fallen off the walls?

☐ Yes | ☒ **No** - Dishes have broken?

☐ Yes | ☒ **No** - Furniture has been moved?

☐ Yes | ☒ **No** - Light furniture has been knocked over?

☐ Yes | ☒ **No** - Small fragments of plaster have fallen from ceilings and walls?

☐ Yes | ☒ **No** - Large numbers of people have left their homes in a hurry?

☐ Yes | ☒ **No** - Some people had the feeling that they were going to fall?

Remark:

### 5. In houses:

☐ Yes | ☒ **No** - Heavy pieces of furniture have been knocked over?

☐ Yes | ☒ **No** - Plastered ceiling have fallen down?

☐ Yes | ☒ **No** - Chimneys have collapsed?

☐ Yes | ☒ **No** - Walls were cracked?

☐ Yes | ☒ **No** - Landslides have occurred along the banks or embankments.

Remark:

Additional comments:

## Official inquiry for MONT-SUR-MARCHIENNE (BE)

Location: 50.391°N 4.406°E, at 24.4 km from the epicentre.

**Imin: 2 - Imax: 2**

---

### 1

☐ Yes | ☒ **No** - A small number of inhabitants, especially those on the upper floors of the houses, noticed a tremor accompanied by a noise comparable to that produced by a heavy car-truck launched at full speed.

Remark:

☒ **Yes** | ☐ No - The trembling of movable objects?

### 2. A large number of people have observed

☒ **Yes** | ☐ No - The shock of glasses or crockery placed very close together?

☐ Yes | ☒ **No** - The shivering of windows and doors?

☐ Yes | ☒ **No** - The creaking of floors?

☐ Yes | ☒ **No** - The rustle of ceilings?

☐ Yes | ☒ **No** - A loud rumbling sound accompanied the shaking?

☐ Yes | ☒ **No** - A number of sleepers woke up?

Note:

### 3

☐ Yes | ☒ **No** - The tremor was perceived by people outdoors?

☐ Yes | ☒ **No** - Inside the houses, everyone was aware of it due to the shaking of the whole construction?

☐ Yes | ☒ **No** - It was as if a heavy vehicle, thrown at full speed, had bumped into the house or a heavy object had overturned in one of the rooms.

☐ Yes | ☒ **No** - We swayed with the chairs, beds, etc...

☐ Yes | ☒ **No** - Freely suspended objects swayed?

☐ Yes | ☒ **No** - Light objects have been moved?

☐ Yes | ☒ **No** - Objects placed on top of furniture have fallen down?

☐ Yes | ☒ **No** - Doors and windows knocked?

☐ Yes | ☒ **No** - Windows broke?

☐ Yes | ☒ **No** - All the sleepers woke up?

☐ Yes | ☒ **No** - A few frightened people came out of the houses?

Remark:

### 4

☐ Yes | ☒ **No** - Frames have fallen off the walls?

☐ Yes | ☒ **No** - Dishes have broken?

☐ Yes | ☒ **No** - Furniture has been moved?

☐ Yes | ☒ **No** - Light furniture has been knocked over?

☐ Yes | ☒ **No** - Small fragments of plaster have fallen from ceilings and walls?

☐ Yes | ☒ **No** - Large numbers of people have left their homes in a hurry?

☐ Yes | ☒ **No** - Some people had the feeling that they were going to fall?

Remark:

### 5. In houses:

☐ Yes | ☒ **No** - Heavy pieces of furniture have been knocked over?

☐ Yes | ☒ **No** - Plastered ceiling have fallen down?

☐ Yes | ☒ **No** - Chimneys have collapsed?

☐ Yes | ☒ **No** - Walls were cracked?

☐ Yes | ☒ **No** - Landslides have occurred along the banks or embankments.

Remark:

Additional comments:

## Official inquiry for MONTIGNIES-LEZ-LENS (BE)

Location: 50.564°N 3.944°E, at 15.0 km from the epicentre.

**Imin: 3 - Imax: 3**

---

**1**

☒ **Yes** | ☐ **No** - A small number of inhabitants, especially those on the upper floors of the houses, noticed a tremor accompanied by a noise comparable to that produced by a heavy car-truck launched at full speed.

Remark:

☐ **Yes** | ☒ **No** - The trembling of movable objects?

**2. A large number of people have observed**

☐ **Yes** | ☒ **No** - The shock of glasses or crockery placed very close together?

☐ **Yes** | ☒ **No** - The shivering of windows and doors?

☐ **Yes** | ☒ **No** - The creaking of floors?

☐ **Yes** | ☒ **No** - The rustle of ceilings?

☐ **Yes** | ☒ **No** - A loud rumbling sound accompanied the shaking?

☐ **Yes** | ☒ **No** - A number of sleepers woke up?

Note:

**3**

☐ **Yes** | ☒ **No** - The tremor was perceived by people outdoors?

☐ **Yes** | ☒ **No** - Inside the houses, everyone was aware of it due to the shaking of the whole construction?

☐ **Yes** | ☒ **No** - It was as if a heavy vehicle, thrown at full speed, had bumped into the house or a heavy object had overturned in one of the rooms.

☐ **Yes** | ☒ **No** - We swayed with the chairs, beds, etc...

☐ **Yes** | ☒ **No** - Freely suspended objects swayed?

☐ **Yes** | ☒ **No** - Light objects have been moved?

☐ **Yes** | ☒ **No** - Objects placed on top of furniture have fallen down?

☐ **Yes** | ☒ **No** - Doors and windows knocked?

☐ **Yes** | ☒ **No** - Windows broke?

☐ **Yes** | ☒ **No** - All the sleepers woke up?

☐ **Yes** | ☒ **No** - A few frightened people came out of the houses?

Remark:

**4**

☐ **Yes** | ☒ **No** - Frames have fallen off the walls?

☐ **Yes** | ☒ **No** - Dishes have broken?

☐ **Yes** | ☒ **No** - Furniture has been moved?

☐ **Yes** | ☒ **No** - Light furniture has been knocked over?

☐ **Yes** | ☒ **No** - Small fragments of plaster have fallen from ceilings and walls?

☐ **Yes** | ☒ **No** - Large numbers of people have left their homes in a hurry?

☐ **Yes** | ☒ **No** - Some people had the feeling that they were going to fall?

Remark:

**5. In houses:**

☐ **Yes** | ☒ **No** - Heavy pieces of furniture have been knocked over?

☐ **Yes** | ☒ **No** - Plastered ceiling have fallen down?

☐ **Yes** | ☒ **No** - Chimneys have collapsed?

☐ **Yes** | ☒ **No** - Walls were cracked?

☐ **Yes** | ☒ **No** - Landslides have occurred along the banks or embankments.

Remark:

Additional comments:

# Official inquiry for MONTIGNIES-SUR-SAMBRE (BE)

Location: 50.398°N 4.481°E, at 29.3 km from the epicentre.

**Imin: 2 - Imax: 2**

## 1

☒ **Yes** | ☐ **No** - A small number of inhabitants, especially those on the upper floors of the houses, noticed a tremor accompanied by a noise comparable to that produced by a heavy car-truck launched at full speed.

Remark:

☐ Yes | ☒ **No** - The trembling of movable objects?

## 2. A large number of people have observed

☐ Yes | ☒ **No** - The shock of glasses or crockery placed very close together?

☐ Yes | ☒ **No** - The shivering of windows and doors?

☐ Yes | ☒ **No** - The creaking of floors?

☐ Yes | ☒ **No** - The rustle of ceilings?

☐ Yes | ☒ **No** - A loud rumbling sound accompanied the shaking?

☐ Yes | ☒ **No** - A number of sleepers woke up?

Note:

## 3

☐ Yes | ☒ **No** - The tremor was perceived by people outdoors?

☐ Yes | ☒ **No** - Inside the houses, everyone was aware of it due to the shaking of the whole construction?

☐ Yes | ☒ **No** - It was as if a heavy vehicle, thrown at full speed, had bumped into the house or a heavy object had overturned in one of the rooms.

☐ Yes | ☒ **No** - We swayed with the chairs, beds, etc...

☐ Yes | ☒ **No** - Freely suspended objects swayed?

☐ Yes | ☒ **No** - Light objects have been moved?

☐ Yes | ☒ **No** - Objects placed on top of furniture have fallen down?

☐ Yes | ☒ **No** - Doors and windows knocked?

☐ Yes | ☒ **No** - Windows broke?

☐ Yes | ☒ **No** - All the sleepers woke up?

☐ Yes | ☒ **No** - A few frightened people came out of the houses?

Remark:

## 4

☐ Yes | ☒ **No** - Frames have fallen off the walls?

☐ Yes | ☒ **No** - Dishes have broken?

☐ Yes | ☒ **No** - Furniture has been moved?

☐ Yes | ☒ **No** - Light furniture has been knocked over?

☐ Yes | ☒ **No** - Small fragments of plaster have fallen from ceilings and walls?

☐ Yes | ☒ **No** - Large numbers of people have left their homes in a hurry?

☐ Yes | ☒ **No** - Some people had the feeling that they were going to fall?

Remark:

## 5. In houses:

☐ Yes | ☒ **No** - Heavy pieces of furniture have been knocked over?

☐ Yes | ☒ **No** - Plastered ceiling have fallen down?

☐ Yes | ☒ **No** - Chimneys have collapsed?

☐ Yes | ☒ **No** - Walls were cracked?

☐ Yes | ☒ **No** - Landslides have occurred along the banks or embankments.

Remark:

Additional comments:

## Official inquiry for MORLANWELZ-MARIEMONT (BE)

Location: 50.456°N 4.244°E, at 12.4 km from the epicentre.

**Imin: 4 - Imax: 5**

### 1

☐ Yes | ☒ **No** - A small number of inhabitants, especially those on the upper floors of the houses, noticed a tremor accompanied by a noise comparable to that produced by a heavy car-truck launched at full speed.

Remark:

☒ **Yes** | ☐ No - The trembling of movable objects?

### 2. A large number of people have observed

☒ **Yes** | ☐ No - The shock of glasses or crockery placed very close together?

☒ **Yes** | ☐ No - The shivering of windows and doors?

☒ **Yes** | ☐ No - The creaking of floors?

☐ Yes | ☒ **No** - The rustle of ceilings?

☒ **Yes** | ☐ No - A loud rumbling sound accompanied the shaking?

☒ **Yes** | ☐ No - A number of sleepers woke up?

Note:

### 3

☐ Yes | ☒ **No** - The tremor was perceived by people outdoors?

☒ **Yes** | ☐ No - Inside the houses, everyone was aware of it due to the shaking of the whole construction?

☒ **Yes** | ☐ No - It was as if a heavy vehicle, thrown at full speed, had bumped into the house or a heavy object had overturned in one of the rooms.

☒ **Yes** | ☐ No - We swayed with the chairs, beds, etc...

☒ **Yes** | ☐ No - Freely suspended objects swayed?

☒ **Yes** | ☐ No - Light objects have been moved?

☐ Yes | ☒ **No** - Objects placed on top of furniture have fallen down?

☒ **Yes** | ☐ No - Doors and windows knocked?

☐ Yes | ☒ **No** - Windows broke?

☒ **Yes** | ☐ No - All the sleepers woke up?

☐ Yes | ☒ **No** - A few frightened people came out of the houses?

Remark:

### 4

☐ Yes | ☒ **No** - Frames have fallen off the walls?

☐ Yes | ☒ **No** - Dishes have broken?

☒ **Yes** | ☐ No - Furniture has been moved?

☐ Yes | ☒ **No** - Light furniture has been knocked over?

☒ **Yes** | ☐ No - Small fragments of plaster have fallen from ceilings and walls?

☒ **Yes** | ☐ No - Large numbers of people have left their homes in a hurry?

☐ Yes | ☒ **No** - Some people had the feeling that they were going to fall?

Remark:

### 5. In houses:

☐ Yes | ☒ **No** - Heavy pieces of furniture have been knocked over?

☒ **Yes** | ☐ No - Plastered ceiling have fallen down?

☐ Yes | ☒ **No** - Chimneys have collapsed?

☐ Yes | ☒ **No** - Walls were cracked?

☐ Yes | ☒ **No** - Landslides have occurred along the banks or embankments.

Remark: **une cheminée s'est effondré également**

Additional comments:

## Official inquiry for NIMY (BE)

Location: 50.473°N 3.959°E, at 8.7 km from the epicentre.

Imin: 5 - Imax: 5

---

### 1

☐ Yes | ☒ **No** - A small number of inhabitants, especially those on the upper floors of the houses, noticed a tremor accompanied by a noise comparable to that produced by a heavy car-truck launched at full speed.

Remark:

☒ **Yes** | ☐ No - The trembling of movable objects?

### 2. A large number of people have observed

☒ **Yes** | ☐ No - The shock of glasses or crockery placed very close together?

☒ **Yes** | ☐ No - The shivering of windows and doors?

☐ Yes | ☒ **No** - The creaking of floors?

☐ Yes | ☒ **No** - The rustle of ceilings?

☒ **Yes** | ☐ No - A loud rumbling sound accompanied the shaking?

☐ Yes | ☒ **No** - A number of sleepers woke up?

Note:

### 3

☒ **Yes** | ☐ No - The tremor was perceived by people outdoors?

☒ **Yes** | ☐ No - Inside the houses, everyone was aware of it due to the shaking of the whole construction?

☐ Yes | ☒ **No** - It was as if a heavy vehicle, thrown at full speed, had bumped into the house or a heavy object had overturned in one of the rooms.

☒ **Yes** | ☐ No - We swayed with the chairs, beds, etc...

☐ Yes | ☒ **No** - Freely suspended objects swayed?

☐ Yes | ☒ **No** - Light objects have been moved?

☐ Yes | ☒ **No** - Objects placed on top of furniture have fallen down?

☐ Yes | ☒ **No** - Doors and windows knocked?

☐ Yes | ☒ **No** - Windows broke?

☐ Yes | ☒ **No** - All the sleepers woke up?

☒ **Yes** | ☐ No - A few frightened people came out of the houses?

Remark:

### 4

☐ Yes | ☒ **No** - Frames have fallen off the walls?

☐ Yes | ☒ **No** - Dishes have broken?

☐ Yes | ☒ **No** - Furniture has been moved?

☐ Yes | ☒ **No** - Light furniture has been knocked over?

☐ Yes | ☒ **No** - Small fragments of plaster have fallen from ceilings and walls?

☐ Yes | ☒ **No** - Large numbers of people have left their homes in a hurry?

☐ Yes | ☒ **No** - Some people had the feeling that they were going to fall?

Remark:

### 5. In houses:

☐ Yes | ☒ **No** - Heavy pieces of furniture have been knocked over?

☐ Yes | ☒ **No** - Plastered ceiling have fallen down?

☐ Yes | ☒ **No** - Chimneys have collapsed?

☐ Yes | ☒ **No** - Walls were cracked?

☐ Yes | ☒ **No** - Landslides have occurred along the banks or embankments.

Remark: **1 cheminée s'est écroulée**

Additional comments:

## Official inquiry for NIVELLES (BE)

Location: 50.61°N 4.338°E, at 24.8 km from the epicentre.

**Imin: 2 - Imax: 2**

### 1

☒ **Yes** | ☐ **No** - A small number of inhabitants, especially those on the upper floors of the houses, noticed a tremor accompanied by a noise comparable to that produced by a heavy car-truck launched at full speed.

Remark: **deux personnes se trouvant au rez-de-chaussée de leur maisons au 69 boulevard Charles Vanpée et 29, avenue Général Jacques ont ressenti un bruit comparable à celui que produit un lourd auto-camion lancé à toute vitesse**

☐ Yes | ☒ **No** - The trembling of movable objects?

### 2. A large number of people have observed

☐ Yes | ☒ **No** - The shock of glasses or crockery placed very close together?

☐ Yes | ☒ **No** - The shivering of windows and doors?

☐ Yes | ☒ **No** - The creaking of floors?

☐ Yes | ☒ **No** - The rustle of ceilings?

☐ Yes | ☒ **No** - A loud rumbling sound accompanied the shaking?

☐ Yes | ☒ **No** - A number of sleepers woke up?

Note:

### 3

☐ Yes | ☒ **No** - The tremor was perceived by people outdoors?

☐ Yes | ☒ **No** - Inside the houses, everyone was aware of it due to the shaking of the whole construction?

☐ Yes | ☒ **No** - It was as if a heavy vehicle, thrown at full speed, had bumped into the house or a heavy object had overturned in one of the rooms.

☐ Yes | ☒ **No** - We swayed with the chairs, beds, etc...

☐ Yes | ☒ **No** - Freely suspended objects swayed?

☐ Yes | ☒ **No** - Light objects have been moved?

☐ Yes | ☒ **No** - Objects placed on top of furniture have fallen down?

☐ Yes | ☒ **No** - Doors and windows knocked?

☐ Yes | ☒ **No** - Windows broke?

☐ Yes | ☒ **No** - All the sleepers woke up?

☐ Yes | ☒ **No** - A few frightened people came out of the houses?

Remark:

### 4

☐ Yes | ☒ **No** - Frames have fallen off the walls?

☐ Yes | ☒ **No** - Dishes have broken?

☐ Yes | ☒ **No** - Furniture has been moved?

☐ Yes | ☒ **No** - Light furniture has been knocked over?

☐ Yes | ☒ **No** - Small fragments of plaster have fallen from ceilings and walls?

☐ Yes | ☒ **No** - Large numbers of people have left their homes in a hurry?

☐ Yes | ☒ **No** - Some people had the feeling that they were going to fall?

Remark:

### 5. In houses:

☐ Yes | ☒ **No** - Heavy pieces of furniture have been knocked over?

☐ Yes | ☒ **No** - Plastered ceiling have fallen down?

☐ Yes | ☒ **No** - Chimneys have collapsed?

☐ Yes | ☒ **No** - Walls were cracked?

☐ Yes | ☒ **No** - Landslides have occurred along the banks or embankments.

Remark:

Additional comments:

## Official inquiry for NOUVELLES (BE)

Location: 50.412°N 3.969°E, at 9.5 km from the epicentre.

**Imin: 2 - Imax: 2**

### 1

☒ **Yes** | ☐ **No** - A small number of inhabitants, especially those on the upper floors of the houses, noticed a tremor accompanied by a noise comparable to that produced by a heavy car-truck launched at full speed.

Remark:

☐ Yes | ☒ **No** - The trembling of movable objects?

### 2. A large number of people have observed

☐ Yes | ☒ **No** - The shock of glasses or crockery placed very close together?

☐ Yes | ☒ **No** - The shivering of windows and doors?

☐ Yes | ☒ **No** - The creaking of floors?

☐ Yes | ☒ **No** - The rustle of ceilings?

☐ Yes | ☒ **No** - A loud rumbling sound accompanied the shaking?

☐ Yes | ☒ **No** - A number of sleepers woke up?

Note:

### 3

☐ Yes | ☒ **No** - The tremor was perceived by people outdoors?

☐ Yes | ☒ **No** - Inside the houses, everyone was aware of it due to the shaking of the whole construction?

☐ Yes | ☒ **No** - It was as if a heavy vehicle, thrown at full speed, had bumped into the house or a heavy object had overturned in one of the rooms.

☐ Yes | ☒ **No** - We swayed with the chairs, beds, etc...

☐ Yes | ☒ **No** - Freely suspended objects swayed?

☐ Yes | ☒ **No** - Light objects have been moved?

☐ Yes | ☒ **No** - Objects placed on top of furniture have fallen down?

☐ Yes | ☒ **No** - Doors and windows knocked?

☐ Yes | ☒ **No** - Windows broke?

☐ Yes | ☒ **No** - All the sleepers woke up?

☐ Yes | ☒ **No** - A few frightened people came out of the houses?

Remark:

### 4

☐ Yes | ☒ **No** - Frames have fallen off the walls?

☐ Yes | ☒ **No** - Dishes have broken?

☐ Yes | ☒ **No** - Furniture has been moved?

☐ Yes | ☒ **No** - Light furniture has been knocked over?

☐ Yes | ☒ **No** - Small fragments of plaster have fallen from ceilings and walls?

☐ Yes | ☒ **No** - Large numbers of people have left their homes in a hurry?

☐ Yes | ☒ **No** - Some people had the feeling that they were going to fall?

Remark:

### 5. In houses:

☐ Yes | ☒ **No** - Heavy pieces of furniture have been knocked over?

☐ Yes | ☒ **No** - Plastered ceiling have fallen down?

☐ Yes | ☒ **No** - Chimneys have collapsed?

☐ Yes | ☒ **No** - Walls were cracked?

☐ Yes | ☒ **No** - Landslides have occurred along the banks or embankments.

Remark:

Additional comments:

## Official inquiry for OBAIX (BE)

Location: 50.527°N 4.363°E, at 21.4 km from the epicentre.

**Imin: 3 - Imax: 3**

---

### 1

☐ Yes | ☒ **No** - A small number of inhabitants, especially those on the upper floors of the houses, noticed a tremor accompanied by a noise comparable to that produced by a heavy car-truck launched at full speed.

Remark:

☐ Yes | ☒ **No** - The trembling of movable objects?

### 2. A large number of people have observed

☐ Yes | ☒ **No** - The shock of glasses or crockery placed very close together?

☐ Yes | ☒ **No** - The shivering of windows and doors?

☐ Yes | ☒ **No** - The creaking of floors?

☐ Yes | ☒ **No** - The rustle of ceilings?

☐ Yes | ☒ **No** - A loud rumbling sound accompanied the shaking?

☐ Yes | ☒ **No** - A number of sleepers woke up?

Note:

### 3

☐ Yes | ☒ **No** - The tremor was perceived by people outdoors?

☐ Yes | ☒ **No** - Inside the houses, everyone was aware of it due to the shaking of the whole construction?

☐ Yes | ☒ **No** - It was as if a heavy vehicle, thrown at full speed, had bumped into the house or a heavy object had overturned in one of the rooms.

☐ Yes | ☒ **No** - We swayed with the chairs, beds, etc...

☐ Yes | ☒ **No** - Freely suspended objects swayed?

☐ Yes | ☒ **No** - Light objects have been moved?

☐ Yes | ☒ **No** - Objects placed on top of furniture have fallen down?

☒ **Yes** | ☐ **No** - Doors and windows knocked?

☐ Yes | ☒ **No** - Windows broke?

☐ Yes | ☒ **No** - All the sleepers woke up?

☐ Yes | ☒ **No** - A few frightened people came out of the houses?

Remark:

### 4

☐ Yes | ☒ **No** - Frames have fallen off the walls?

☐ Yes | ☒ **No** - Dishes have broken?

☐ Yes | ☒ **No** - Furniture has been moved?

☐ Yes | ☒ **No** - Light furniture has been knocked over?

☐ Yes | ☒ **No** - Small fragments of plaster have fallen from ceilings and walls?

☐ Yes | ☒ **No** - Large numbers of people have left their homes in a hurry?

☐ Yes | ☒ **No** - Some people had the feeling that they were going to fall?

Remark: **un crucifix est tombé**

### 5. In houses:

☐ Yes | ☒ **No** - Heavy pieces of furniture have been knocked over?

☐ Yes | ☒ **No** - Plastered ceiling have fallen down?

☐ Yes | ☒ **No** - Chimneys have collapsed?

☐ Yes | ☒ **No** - Walls were cracked?

☐ Yes | ☒ **No** - Landslides have occurred along the banks or embankments.

Remark:

Additional comments:

# Official inquiry for OBOURG (BE)

Location: 50.475°N 4.008°E, at 5.4 km from the epicentre.

**Imin: 6 - Imax: 6**

## 1

☒ **Yes** | ☐ No - A small number of inhabitants, especially those on the upper floors of the houses, noticed a tremor accompanied by a noise comparable to that produced by a heavy car-truck launched at full speed.

Remark:

☒ **Yes** | ☐ No - The trembling of movable objects?

## 2. A large number of people have observed

☒ **Yes** | ☐ No - The shock of glasses or crockery placed very close together?

☒ **Yes** | ☐ No - The shivering of windows and doors?

☒ **Yes** | ☐ No - The creaking of floors?

☒ **Yes** | ☐ No - The rustle of ceilings?

☒ **Yes** | ☐ No - A loud rumbling sound accompanied the shaking?

☒ **Yes** | ☐ No - A number of sleepers woke up?

Note:

## 3

☒ **Yes** | ☐ No - The tremor was perceived by people outdoors?

☒ **Yes** | ☐ No - Inside the houses, everyone was aware of it due to the shaking of the whole construction?

☒ **Yes** | ☐ No - It was as if a heavy vehicle, thrown at full speed, had bumped into the house or a heavy object had overturned in one of the rooms.

☒ **Yes** | ☐ No - We swayed with the chairs, beds, etc...

☒ **Yes** | ☐ No - Freely suspended objects swayed?

☒ **Yes** | ☐ No - Light objects have been moved?

☒ **Yes** | ☐ No - Objects placed on top of furniture have fallen down?

☒ **Yes** | ☐ No - Doors and windows knocked?

☒ **Yes** | ☐ No - Windows broke?

☐ Yes | ☒ **No** - All the sleepers woke up?

☒ **Yes** | ☐ No - A few frightened people came out of the houses?

Remark:

## 4

☐ Yes | ☒ **No** - Frames have fallen off the walls?

☒ **Yes** | ☐ No - Dishes have broken?

☐ Yes | ☒ **No** - Furniture has been moved?

☒ **Yes** | ☐ No - Light furniture has been knocked over?

☒ **Yes** | ☐ No - Small fragments of plaster have fallen from ceilings and walls?

☒ **Yes** | ☐ No - Large numbers of people have left their homes in a hurry?

☒ **Yes** | ☐ No - Some people had the feeling that they were going to fall?

Remark:

## 5. In houses:

☐ Yes | ☒ **No** - Heavy pieces of furniture have been knocked over?

☒ **Yes** | ☐ No - Plastered ceiling have fallen down?

☒ **Yes** | ☐ No - Chimneys have collapsed?

☐ Yes | ☒ **No** - Walls were cracked?

☐ Yes | ☒ **No** - Landslides have occurred along the banks or embankments.

Remark:

Additional comments:

## Official inquiry for PATURAGES (BE)

Location: 50.414°N 3.862°E, at 16.3 km from the epicentre.

Imin: 3 - Imax: 3

### 1

☐ Yes | ☒ **No** - A small number of inhabitants, especially those on the upper floors of the houses, noticed a tremor accompanied by a noise comparable to that produced by a heavy car-truck launched at full speed.

Remark:

☐ Yes | ☒ **No** - The trembling of movable objects?

### 2. A large number of people have observed

☐ Yes | ☒ **No** - The shock of glasses or crockery placed very close together?

☐ Yes | ☒ **No** - The shivering of windows and doors?

☐ Yes | ☒ **No** - The creaking of floors?

☐ Yes | ☒ **No** - The rustle of ceilings?

☐ Yes | ☒ **No** - A loud rumbling sound accompanied the shaking?

☐ Yes | ☒ **No** - A number of sleepers woke up?

Note:

### 3

☐ Yes | ☒ **No** - The tremor was perceived by people outdoors?

☐ Yes | ☒ **No** - Inside the houses, everyone was aware of it due to the shaking of the whole construction?

☐ Yes | ☒ **No** - It was as if a heavy vehicle, thrown at full speed, had bumped into the house or a heavy object had overturned in one of the rooms.

☒ **Yes** | ☐ **No** - We swayed with the chairs, beds, etc...

☐ Yes | ☒ **No** - Freely suspended objects swayed?

☐ Yes | ☒ **No** - Light objects have been moved?

☐ Yes | ☒ **No** - Objects placed on top of furniture have fallen down?

☐ Yes | ☒ **No** - Doors and windows knocked?

☐ Yes | ☒ **No** - Windows broke?

☐ Yes | ☒ **No** - All the sleepers woke up?

☐ Yes | ☒ **No** - A few frightened people came out of the houses?

Remark: **les époux descamps Leon domicilié à rue de colfontaine 117 ont ressenti une secousse vers 13H30 environ. il ont eu l'impression qu'un camion lourd passait dans la rue et il ont oscillés pendant 1/2 minute dans leurs fauteils**

### 4

☐ Yes | ☒ **No** - Frames have fallen off the walls?

☐ Yes | ☒ **No** - Dishes have broken?

☐ Yes | ☒ **No** - Furniture has been moved?

☐ Yes | ☒ **No** - Light furniture has been knocked over?

☐ Yes | ☒ **No** - Small fragments of plaster have fallen from ceilings and walls?

☐ Yes | ☒ **No** - Large numbers of people have left their homes in a hurry?

☐ Yes | ☒ **No** - Some people had the feeling that they were going to fall?

Remark:

### 5. In houses:

☐ Yes | ☒ **No** - Heavy pieces of furniture have been knocked over?

☐ Yes | ☒ **No** - Plastered ceiling have fallen down?

☐ Yes | ☒ **No** - Chimneys have collapsed?

☐ Yes | ☒ **No** - Walls were cracked?

☐ Yes | ☒ **No** - Landslides have occurred along the banks or embankments.

Remark:

Additional comments:

## Official inquiry for PEISSANT (BE)

Location: 50.351°N 4.12°E, at 12.4 km from the epicentre.

**Imin: 4 - Imax: 4**

### 1

☐ Yes | ☒ **No** - A small number of inhabitants, especially those on the upper floors of the houses, noticed a tremor accompanied by a noise comparable to that produced by a heavy car-truck launched at full speed.

Remark:

☒ **Yes** | ☐ No - The trembling of movable objects?

### 2. A large number of people have observed

☒ **Yes** | ☐ No - The shock of glasses or crockery placed very close together?

☒ **Yes** | ☐ No - The shivering of windows and doors?

☐ Yes | ☒ **No** - The creaking of floors?

☐ Yes | ☒ **No** - The rustle of ceilings?

☒ **Yes** | ☐ No - A loud rumbling sound accompanied the shaking?

☒ **Yes** | ☐ No - A number of sleepers woke up?

Note:

### 3

☐ Yes | ☒ **No** - The tremor was perceived by people outdoors?

☐ Yes | ☒ **No** - Inside the houses, everyone was aware of it due to the shaking of the whole construction?

☐ Yes | ☒ **No** - It was as if a heavy vehicle, thrown at full speed, had bumped into the house or a heavy object had overturned in one of the rooms.

☐ Yes | ☒ **No** - We swayed with the chairs, beds, etc...

☒ **Yes** | ☐ No - Freely suspended objects swayed?

☐ Yes | ☒ **No** - Light objects have been moved?

☐ Yes | ☒ **No** - Objects placed on top of furniture have fallen down?

☐ Yes | ☒ **No** - Doors and windows knocked?

☐ Yes | ☒ **No** - Windows broke?

☐ Yes | ☒ **No** - All the sleepers woke up?

☐ Yes | ☒ **No** - A few frightened people came out of the houses?

Remark:

### 4

☐ Yes | ☒ **No** - Frames have fallen off the walls?

☐ Yes | ☒ **No** - Dishes have broken?

☐ Yes | ☒ **No** - Furniture has been moved?

☐ Yes | ☒ **No** - Light furniture has been knocked over?

☐ Yes | ☒ **No** - Small fragments of plaster have fallen from ceilings and walls?

☐ Yes | ☒ **No** - Large numbers of people have left their homes in a hurry?

☐ Yes | ☒ **No** - Some people had the feeling that they were going to fall?

Remark:

### 5. In houses:

☐ Yes | ☒ **No** - Heavy pieces of furniture have been knocked over?

☐ Yes | ☒ **No** - Plastered ceiling have fallen down?

☐ Yes | ☒ **No** - Chimneys have collapsed?

☐ Yes | ☒ **No** - Walls were cracked?

☐ Yes | ☒ **No** - Landslides have occurred along the banks or embankments.

Remark:

Additional comments:

## Official inquiry for PERONNES-LEZ-BINCHE (BE)

Location: 50.436°N 4.146°E, at 5.4 km from the epicentre.

Imin: 5 - Imax: 5

1

☒ **Yes** | ☐ No - A small number of inhabitants, especially those on the upper floors of the houses, noticed a tremor accompanied by a noise comparable to that produced by a heavy car-truck launched at full speed.

Remark:

☒ **Yes** | ☐ No - The trembling of movable objects?

### 2. A large number of people have observed

☒ **Yes** | ☐ No - The shock of glasses or crockery placed very close together?

☒ **Yes** | ☐ No - The shivering of windows and doors?

☒ **Yes** | ☐ No - The creaking of floors?

☒ **Yes** | ☐ No - The rustle of ceilings?

☒ **Yes** | ☐ No - A loud rumbling sound accompanied the shaking?

☒ **Yes** | ☐ No - A number of sleepers woke up?

Note:

3

☐ Yes | ☒ **No** - The tremor was perceived by people outdoors?

☒ **Yes** | ☐ No - Inside the houses, everyone was aware of it due to the shaking of the whole construction?

☒ **Yes** | ☐ No - It was as if a heavy vehicle, thrown at full speed, had bumped into the house or a heavy object had overturned in one of the rooms.

☒ **Yes** | ☐ No - We swayed with the chairs, beds, etc...

☒ **Yes** | ☐ No - Freely suspended objects swayed?

☒ **Yes** | ☐ No - Light objects have been moved?

☐ Yes | ☒ **No** - Objects placed on top of furniture have fallen down?

☐ Yes | ☒ **No** - Doors and windows knocked?

☒ **Yes** | ☐ No - Windows broke?

☐ Yes | ☒ **No** - All the sleepers woke up?

☒ **Yes** | ☐ No - A few frightened people came out of the houses?

Remark: **une vitre s'est brisée**

4

☒ **Yes** | ☐ No - Frames have fallen off the walls?

☐ Yes | ☒ **No** - Dishes have broken?

☐ Yes | ☒ **No** - Furniture has been moved?

☐ Yes | ☒ **No** - Light furniture has been knocked over?

☒ **Yes** | ☐ No - Small fragments of plaster have fallen from ceilings and walls?

☒ **Yes** | ☐ No - Large numbers of people have left their homes in a hurry?

☒ **Yes** | ☐ No - Some people had the feeling that they were going to fall?

Remark: **un cadre est tombe du mur**

### 5. In houses:

☐ Yes | ☒ **No** - Heavy pieces of furniture have been knocked over?

☐ Yes | ☒ **No** - Plastered ceiling have fallen down?

☐ Yes | ☒ **No** - Chimneys have collapsed?

☐ Yes | ☒ **No** - Walls were cracked?

☐ Yes | ☒ **No** - Landslides have occurred along the banks or embankments.

Remark: **une cheminée a été endommagée**

Additional comments: **les personnes se trouvant à l'exterieur des batiments n'ont pas ou peu ressenti les secousses par apport à ceux qui étaient à l'interieur.**

# Official inquiry for PETIT-ROEULX-LEZ-NIVELLES (BE)

Location: 50.553°N 4.317°E, at 19.7 km from the epicentre.

**Imin: 3 - Imax: 3**

## 1

☒ **Yes** | ☐ **No** - A small number of inhabitants, especially those on the upper floors of the houses, noticed a tremor accompanied by a noise comparable to that produced by a heavy car-truck launched at full speed.

Remark:

☐ Yes | ☒ **No** - The trembling of movable objects?

## 2. A large number of people have observed

☐ Yes | ☒ **No** - The shock of glasses or crockery placed very close together?

☐ Yes | ☒ **No** - The shivering of windows and doors?

☐ Yes | ☒ **No** - The creaking of floors?

☐ Yes | ☒ **No** - The rustle of ceilings?

☐ Yes | ☒ **No** - A loud rumbling sound accompanied the shaking?

☐ Yes | ☒ **No** - A number of sleepers woke up?

Note:

## 3

☐ Yes | ☒ **No** - The tremor was perceived by people outdoors?

☐ Yes | ☒ **No** - Inside the houses, everyone was aware of it due to the shaking of the whole construction?

☐ Yes | ☒ **No** - It was as if a heavy vehicle, thrown at full speed, had bumped into the house or a heavy object had overturned in one of the rooms.

☒ **Yes** | ☐ **No** - We swayed with the chairs, beds, etc...

☐ Yes | ☒ **No** - Freely suspended objects swayed?

☐ Yes | ☒ **No** - Light objects have been moved?

☐ Yes | ☒ **No** - Objects placed on top of furniture have fallen down?

☐ Yes | ☒ **No** - Doors and windows knocked?

☐ Yes | ☒ **No** - Windows broke?

☐ Yes | ☒ **No** - All the sleepers woke up?

☐ Yes | ☒ **No** - A few frightened people came out of the houses?

Remark:

## 4

☐ Yes | ☒ **No** - Frames have fallen off the walls?

☐ Yes | ☒ **No** - Dishes have broken?

☐ Yes | ☒ **No** - Furniture has been moved?

☐ Yes | ☒ **No** - Light furniture has been knocked over?

☐ Yes | ☒ **No** - Small fragments of plaster have fallen from ceilings and walls?

☐ Yes | ☒ **No** - Large numbers of people have left their homes in a hurry?

☐ Yes | ☒ **No** - Some people had the feeling that they were going to fall?

Remark:

## 5. In houses:

☐ Yes | ☒ **No** - Heavy pieces of furniture have been knocked over?

☐ Yes | ☒ **No** - Plastered ceiling have fallen down?

☐ Yes | ☒ **No** - Chimneys have collapsed?

☐ Yes | ☒ **No** - Walls were cracked?

☐ Yes | ☒ **No** - Landslides have occurred along the banks or embankments.

Remark:

Additional comments:

## Official inquiry for PONT-A-CELLES (BE)

Location: 50.511°N 4.363°E, at 20.9 km from the epicentre.

**Imin: 3 - Imax: 3**

---

### 1

☒ **Yes** | ☐ **No** - A small number of inhabitants, especially those on the upper floors of the houses, noticed a tremor accompanied by a noise comparable to that produced by a heavy car-truck launched at full speed.

Remark:

☐ **Yes** | ☒ **No** - The trembling of movable objects?

### 2. A large number of people have observed

☐ **Yes** | ☒ **No** - The shock of glasses or crockery placed very close together?

☐ **Yes** | ☒ **No** - The shivering of windows and doors?

☐ **Yes** | ☒ **No** - The creaking of floors?

☐ **Yes** | ☒ **No** - The rustle of ceilings?

☐ **Yes** | ☒ **No** - A loud rumbling sound accompanied the shaking?

☐ **Yes** | ☒ **No** - A number of sleepers woke up?

Note:

### 3

☐ **Yes** | ☒ **No** - The tremor was perceived by people outdoors?

☐ **Yes** | ☒ **No** - Inside the houses, everyone was aware of it due to the shaking of the whole construction?

☒ **Yes** | ☐ **No** - It was as if a heavy vehicle, thrown at full speed, had bumped into the house or a heavy object had overturned in one of the rooms.

☒ **Yes** | ☐ **No** - We swayed with the chairs, beds, etc...

☐ **Yes** | ☒ **No** - Freely suspended objects swayed?

☐ **Yes** | ☒ **No** - Light objects have been moved?

☐ **Yes** | ☒ **No** - Objects placed on top of furniture have fallen down?

☐ **Yes** | ☒ **No** - Doors and windows knocked?

☐ **Yes** | ☒ **No** - Windows broke?

☐ **Yes** | ☒ **No** - All the sleepers woke up?

☐ **Yes** | ☒ **No** - A few frightened people came out of the houses?

Remark:

### 4

☐ **Yes** | ☒ **No** - Frames have fallen off the walls?

☐ **Yes** | ☒ **No** - Dishes have broken?

☐ **Yes** | ☒ **No** - Furniture has been moved?

☐ **Yes** | ☒ **No** - Light furniture has been knocked over?

☐ **Yes** | ☒ **No** - Small fragments of plaster have fallen from ceilings and walls?

☐ **Yes** | ☒ **No** - Large numbers of people have left their homes in a hurry?

☒ **Yes** | ☐ **No** - Some people had the feeling that they were going to fall?

Remark:

### 5. In houses:

☐ **Yes** | ☒ **No** - Heavy pieces of furniture have been knocked over?

☐ **Yes** | ☒ **No** - Plastered ceiling have fallen down?

☐ **Yes** | ☒ **No** - Chimneys have collapsed?

☐ **Yes** | ☒ **No** - Walls were cracked?

☐ **Yes** | ☒ **No** - Landslides have occurred along the banks or embankments.

Remark:

Additional comments:

## Official inquiry for QUEVY-LE-GRAND (BE)

Location: 50.359°N 3.947°E, at 14.7 km from the epicentre.

**Imin: 4 - Imax: 4**

### 1

☒ **Yes** | ☐ **No** - A small number of inhabitants, especially those on the upper floors of the houses, noticed a tremor accompanied by a noise comparable to that produced by a heavy car-truck launched at full speed.

Remark:

☒ **Yes** | ☐ **No** - The trembling of movable objects?

### 2. A large number of people have observed

☒ **Yes** | ☐ **No** - The shock of glasses or crockery placed very close together?

☒ **Yes** | ☐ **No** - The shivering of windows and doors?

☒ **Yes** | ☐ **No** - The creaking of floors?

☒ **Yes** | ☐ **No** - The rustle of ceilings?

☒ **Yes** | ☐ **No** - A loud rumbling sound accompanied the shaking?

☐ **Yes** | ☒ **No** - A number of sleepers woke up?

Note:

### 3

☐ **Yes** | ☒ **No** - The tremor was perceived by people outdoors?

☐ **Yes** | ☒ **No** - Inside the houses, everyone was aware of it due to the shaking of the whole construction?

☐ **Yes** | ☒ **No** - It was as if a heavy vehicle, thrown at full speed, had bumped into the house or a heavy object had overturned in one of the rooms.

☐ **Yes** | ☒ **No** - We swayed with the chairs, beds, etc...

☐ **Yes** | ☒ **No** - Freely suspended objects swayed?

☐ **Yes** | ☒ **No** - Light objects have been moved?

☐ **Yes** | ☒ **No** - Objects placed on top of furniture have fallen down?

☐ **Yes** | ☒ **No** - Doors and windows knocked?

☐ **Yes** | ☒ **No** - Windows broke?

☐ **Yes** | ☒ **No** - All the sleepers woke up?

☐ **Yes** | ☒ **No** - A few frightened people came out of the houses?

Remark:

### 4

☐ **Yes** | ☒ **No** - Frames have fallen off the walls?

☐ **Yes** | ☒ **No** - Dishes have broken?

☐ **Yes** | ☒ **No** - Furniture has been moved?

☐ **Yes** | ☒ **No** - Light furniture has been knocked over?

☐ **Yes** | ☒ **No** - Small fragments of plaster have fallen from ceilings and walls?

☐ **Yes** | ☒ **No** - Large numbers of people have left their homes in a hurry?

☐ **Yes** | ☒ **No** - Some people had the feeling that they were going to fall?

Remark:

### 5. In houses:

☐ **Yes** | ☒ **No** - Heavy pieces of furniture have been knocked over?

☐ **Yes** | ☒ **No** - Plastered ceiling have fallen down?

☐ **Yes** | ☒ **No** - Chimneys have collapsed?

☐ **Yes** | ☒ **No** - Walls were cracked?

☐ **Yes** | ☒ **No** - Landslides have occurred along the banks or embankments.

Remark:

Additional comments:

## Official inquiry for QUEVY-LE-PETIT (BE)

Location: 50.367°N 3.939°E, at 14.4 km from the epicentre.

**Imin: 3 - Imax: 3**

### 1

☒ **Yes** | ☐ **No** - A small number of inhabitants, especially those on the upper floors of the houses, noticed a tremor accompanied by a noise comparable to that produced by a heavy car-truck launched at full speed.

Remark: **un très petit nombre d'habitants ont remarqué un léger ebranlement**

☐ Yes | ☒ **No** - The trembling of movable objects?

### 2. A large number of people have observed

☐ Yes | ☒ **No** - The shock of glasses or crockery placed very close together?

☐ Yes | ☒ **No** - The shivering of windows and doors?

☐ Yes | ☒ **No** - The creaking of floors?

☐ Yes | ☒ **No** - The rustle of ceilings?

☐ Yes | ☒ **No** - A loud rumbling sound accompanied the shaking?

☐ Yes | ☒ **No** - A number of sleepers woke up?

Note:

### 3

☐ Yes | ☒ **No** - The tremor was perceived by people outdoors?

☐ Yes | ☒ **No** - Inside the houses, everyone was aware of it due to the shaking of the whole construction?

☐ Yes | ☒ **No** - It was as if a heavy vehicle, thrown at full speed, had bumped into the house or a heavy object had overturned in one of the rooms.

☐ Yes | ☒ **No** - We swayed with the chairs, beds, etc...

☐ Yes | ☒ **No** - Freely suspended objects swayed?

☐ Yes | ☒ **No** - Light objects have been moved?

☐ Yes | ☒ **No** - Objects placed on top of furniture have fallen down?

☐ Yes | ☒ **No** - Doors and windows knocked?

☐ Yes | ☒ **No** - Windows broke?

☐ Yes | ☒ **No** - All the sleepers woke up?

☐ Yes | ☒ **No** - A few frightened people came out of the houses?

Remark:

### 4

☐ Yes | ☒ **No** - Frames have fallen off the walls?

☐ Yes | ☒ **No** - Dishes have broken?

☐ Yes | ☒ **No** - Furniture has been moved?

☐ Yes | ☒ **No** - Light furniture has been knocked over?

☐ Yes | ☒ **No** - Small fragments of plaster have fallen from ceilings and walls?

☐ Yes | ☒ **No** - Large numbers of people have left their homes in a hurry?

☐ Yes | ☒ **No** - Some people had the feeling that they were going to fall?

Remark:

### 5. In houses:

☐ Yes | ☒ **No** - Heavy pieces of furniture have been knocked over?

☐ Yes | ☒ **No** - Plastered ceiling have fallen down?

☐ Yes | ☒ **No** - Chimneys have collapsed?

☐ Yes | ☒ **No** - Walls were cracked?

☐ Yes | ☒ **No** - Landslides have occurred along the banks or embankments.

Remark:

Additional comments:

## Official inquiry for RESSAIX (BE)

Location: 50.423°N 4.192°E, at 8.9 km from the epicentre.

**Imin: 4 - Imax: 4**

---

### 1

☐ Yes | ☒ **No** - A small number of inhabitants, especially those on the upper floors of the houses, noticed a tremor accompanied by a noise comparable to that produced by a heavy car-truck launched at full speed.

Remark:

☐ Yes | ☒ **No** - The trembling of movable objects?

### 2. A large number of people have observed

☐ Yes | ☒ **No** - The shock of glasses or crockery placed very close together?

☐ Yes | ☒ **No** - The shivering of windows and doors?

☐ Yes | ☒ **No** - The creaking of floors?

☐ Yes | ☒ **No** - The rustle of ceilings?

☐ Yes | ☒ **No** - A loud rumbling sound accompanied the shaking?

☐ Yes | ☒ **No** - A number of sleepers woke up?

Note:

### 3

☒ **Yes** | ☐ No - The tremor was perceived by people outdoors?

☒ **Yes** | ☐ No - Inside the houses, everyone was aware of it due to the shaking of the whole construction?

☒ **Yes** | ☐ No - It was as if a heavy vehicle, thrown at full speed, had bumped into the house or a heavy object had overturned in one of the rooms.

☒ **Yes** | ☐ No - We swayed with the chairs, beds, etc...

☒ **Yes** | ☐ No - Freely suspended objects swayed?

☒ **Yes** | ☐ No - Light objects have been moved?

☒ **Yes** | ☐ No - Objects placed on top of furniture have fallen down?

☒ **Yes** | ☐ No - Doors and windows knocked?

☒ **Yes** | ☐ No - Windows broke?

☒ **Yes** | ☐ No - All the sleepers woke up?

☒ **Yes** | ☐ No - A few frightened people came out of the houses?

Remark:

### 4

☐ Yes | ☒ **No** - Frames have fallen off the walls?

☐ Yes | ☒ **No** - Dishes have broken?

☐ Yes | ☒ **No** - Furniture has been moved?

☐ Yes | ☒ **No** - Light furniture has been knocked over?

☐ Yes | ☒ **No** - Small fragments of plaster have fallen from ceilings and walls?

☐ Yes | ☒ **No** - Large numbers of people have left their homes in a hurry?

☐ Yes | ☒ **No** - Some people had the feeling that they were going to fall?

Remark:

### 5. In houses:

☐ Yes | ☒ **No** - Heavy pieces of furniture have been knocked over?

☐ Yes | ☒ **No** - Plastered ceiling have fallen down?

☐ Yes | ☒ **No** - Chimneys have collapsed?

☐ Yes | ☒ **No** - Walls were cracked?

☐ Yes | ☒ **No** - Landslides have occurred along the banks or embankments.

Remark:

Additional comments:

## Official inquiry for REVES (BE)

Location: 50.538°N 4.416°E, at 25.2 km from the epicentre.

**Imin: 3 - Imax: 4**

---

### 1

☒ **Yes** | ☐ **No** - A small number of inhabitants, especially those on the upper floors of the houses, noticed a tremor accompanied by a noise comparable to that produced by a heavy car-truck launched at full speed.

Remark:

☒ **Yes** | ☐ **No** - The trembling of movable objects?

### 2. A large number of people have observed

☐ **Yes** | ☒ **No** - The shock of glasses or crockery placed very close together?

☐ **Yes** | ☒ **No** - The shivering of windows and doors?

☐ **Yes** | ☒ **No** - The creaking of floors?

☐ **Yes** | ☒ **No** - The rustle of ceilings?

☒ **Yes** | ☐ **No** - A loud rumbling sound accompanied the shaking?

☐ **Yes** | ☒ **No** - A number of sleepers woke up?

Note:

### 3

☐ **Yes** | ☒ **No** - The tremor was perceived by people outdoors?

☐ **Yes** | ☒ **No** - Inside the houses, everyone was aware of it due to the shaking of the whole construction?

☐ **Yes** | ☒ **No** - It was as if a heavy vehicle, thrown at full speed, had bumped into the house or a heavy object had overturned in one of the rooms.

☒ **Yes** | ☐ **No** - We swayed with the chairs, beds, etc...

☐ **Yes** | ☒ **No** - Freely suspended objects swayed?

☐ **Yes** | ☒ **No** - Light objects have been moved?

☐ **Yes** | ☒ **No** - Objects placed on top of furniture have fallen down?

☐ **Yes** | ☒ **No** - Doors and windows knocked?

☐ **Yes** | ☒ **No** - Windows broke?

☐ **Yes** | ☒ **No** - All the sleepers woke up?

☐ **Yes** | ☒ **No** - A few frightened people came out of the houses?

Remark:

### 4

☐ **Yes** | ☒ **No** - Frames have fallen off the walls?

☐ **Yes** | ☒ **No** - Dishes have broken?

☐ **Yes** | ☒ **No** - Furniture has been moved?

☐ **Yes** | ☒ **No** - Light furniture has been knocked over?

☐ **Yes** | ☒ **No** - Small fragments of plaster have fallen from ceilings and walls?

☐ **Yes** | ☒ **No** - Large numbers of people have left their homes in a hurry?

☐ **Yes** | ☒ **No** - Some people had the feeling that they were going to fall?

Remark:

### 5. In houses:

☐ **Yes** | ☒ **No** - Heavy pieces of furniture have been knocked over?

☐ **Yes** | ☒ **No** - Plastered ceiling have fallen down?

☐ **Yes** | ☒ **No** - Chimneys have collapsed?

☐ **Yes** | ☒ **No** - Walls were cracked?

☐ **Yes** | ☒ **No** - Landslides have occurred along the banks or embankments.

Remark:

Additional comments:

## Official inquiry for SAINT-DENIS (BE)

Location: 50.491°N 4.019°E, at 5.5 km from the epicentre.

**Imin: 4 - Imax: 5**

### 1

☐ Yes | ☒ **No** - A small number of inhabitants, especially those on the upper floors of the houses, noticed a tremor accompanied by a noise comparable to that produced by a heavy car-truck launched at full speed.

Remark:

☒ **Yes** | ☐ No - The trembling of movable objects?

### 2. A large number of people have observed

☒ **Yes** | ☐ No - The shock of glasses or crockery placed very close together?

☒ **Yes** | ☐ No - The shivering of windows and doors?

☒ **Yes** | ☐ No - The creaking of floors?

☒ **Yes** | ☐ No - The rustle of ceilings?

☒ **Yes** | ☐ No - A loud rumbling sound accompanied the shaking?

☐ Yes | ☒ **No** - A number of sleepers woke up?

Note:

### 3

☐ Yes | ☒ **No** - The tremor was perceived by people outdoors?

☒ **Yes** | ☐ No - Inside the houses, everyone was aware of it due to the shaking of the whole construction?

☒ **Yes** | ☐ No - It was as if a heavy vehicle, thrown at full speed, had bumped into the house or a heavy object had overturned in one of the rooms.

☐ Yes | ☒ **No** - We swayed with the chairs, beds, etc...

☒ **Yes** | ☐ No - Freely suspended objects swayed?

☒ **Yes** | ☐ No - Light objects have been moved?

☐ Yes | ☒ **No** - Objects placed on top of furniture have fallen down?

☒ **Yes** | ☐ No - Doors and windows knocked?

☐ Yes | ☒ **No** - Windows broke?

☐ Yes | ☒ **No** - All the sleepers woke up?

☒ **Yes** | ☐ No - A few frightened people came out of the houses?

Remark:

### 4

☐ Yes | ☒ **No** - Frames have fallen off the walls?

☐ Yes | ☒ **No** - Dishes have broken?

☐ Yes | ☒ **No** - Furniture has been moved?

☐ Yes | ☒ **No** - Light furniture has been knocked over?

☐ Yes | ☒ **No** - Small fragments of plaster have fallen from ceilings and walls?

☐ Yes | ☒ **No** - Large numbers of people have left their homes in a hurry?

☐ Yes | ☒ **No** - Some people had the feeling that they were going to fall?

Remark:

### 5. In houses:

☐ Yes | ☒ **No** - Heavy pieces of furniture have been knocked over?

☐ Yes | ☒ **No** - Plastered ceiling have fallen down?

☐ Yes | ☒ **No** - Chimneys have collapsed?

☐ Yes | ☒ **No** - Walls were cracked?

☐ Yes | ☒ **No** - Landslides have occurred along the banks or embankments.

Remark:

Additional comments:

## Official inquiry for SAINT-GHISLAIN (BE)

Location: 50.447°N 3.821°E, at 18.5 km from the epicentre.

**Imin: 2 - Imax: 3**

### 1

☒ **Yes** | ☐ **No** - A small number of inhabitants, especially those on the upper floors of the houses, noticed a tremor accompanied by a noise comparable to that produced by a heavy car-truck launched at full speed.

Remark: **toutes les personnes qui ont constaté le tremblement se trouvait à l'étage supérieur des maisons**

☐ Yes | ☒ **No** - The trembling of movable objects?

### 2. A large number of people have observed

☐ Yes | ☒ **No** - The shock of glasses or crockery placed very close together?

☐ Yes | ☒ **No** - The shivering of windows and doors?

☐ Yes | ☒ **No** - The creaking of floors?

☐ Yes | ☒ **No** - The rustle of ceilings?

☐ Yes | ☒ **No** - A loud rumbling sound accompanied the shaking?

☐ Yes | ☒ **No** - A number of sleepers woke up?

Note:

### 3

☐ Yes | ☒ **No** - The tremor was perceived by people outdoors?

☐ Yes | ☒ **No** - Inside the houses, everyone was aware of it due to the shaking of the whole construction?

☐ Yes | ☒ **No** - It was as if a heavy vehicle, thrown at full speed, had bumped into the house or a heavy object had overturned in one of the rooms.

☐ Yes | ☒ **No** - We swayed with the chairs, beds, etc...

☐ Yes | ☒ **No** - Freely suspended objects swayed?

☐ Yes | ☒ **No** - Light objects have been moved?

☐ Yes | ☒ **No** - Objects placed on top of furniture have fallen down?

☐ Yes | ☒ **No** - Doors and windows knocked?

☐ Yes | ☒ **No** - Windows broke?

☐ Yes | ☒ **No** - All the sleepers woke up?

☐ Yes | ☒ **No** - A few frightened people came out of the houses?

Remark:

### 4

☐ Yes | ☒ **No** - Frames have fallen off the walls?

☐ Yes | ☒ **No** - Dishes have broken?

☐ Yes | ☒ **No** - Furniture has been moved?

☐ Yes | ☒ **No** - Light furniture has been knocked over?

☐ Yes | ☒ **No** - Small fragments of plaster have fallen from ceilings and walls?

☐ Yes | ☒ **No** - Large numbers of people have left their homes in a hurry?

☐ Yes | ☒ **No** - Some people had the feeling that they were going to fall?

Remark:

### 5. In houses:

☐ Yes | ☒ **No** - Heavy pieces of furniture have been knocked over?

☐ Yes | ☒ **No** - Plastered ceiling have fallen down?

☐ Yes | ☒ **No** - Chimneys have collapsed?

☐ Yes | ☒ **No** - Walls were cracked?

☐ Yes | ☒ **No** - Landslides have occurred along the banks or embankments.

Remark:

Additional comments:

## Official inquiry for SAINT-SYMPHORIEN (BE)

Location: 50.438°N 4.007°E, at 5.7 km from the epicentre.

**Imin: 6 - Imax: 7**

### 1

☐ Yes | ☒ **No** - A small number of inhabitants, especially those on the upper floors of the houses, noticed a tremor accompanied by a noise comparable to that produced by a heavy car-truck launched at full speed.

Remark:

☒ **Yes** | ☐ No - The trembling of movable objects?

### 2. A large number of people have observed

☒ **Yes** | ☐ No - The shock of glasses or crockery placed very close together?

☒ **Yes** | ☐ No - The shivering of windows and doors?

☒ **Yes** | ☐ No - The creaking of floors?

☒ **Yes** | ☐ No - The rustle of ceilings?

☒ **Yes** | ☐ No - A loud rumbling sound accompanied the shaking?

☐ Yes | ☒ **No** - A number of sleepers woke up?

Note:

### 3

☐ Yes | ☒ **No** - The tremor was perceived by people outdoors?

☒ **Yes** | ☐ No - Inside the houses, everyone was aware of it due to the shaking of the whole construction?

☐ Yes | ☒ **No** - It was as if a heavy vehicle, thrown at full speed, had bumped into the house or a heavy object had overturned in one of the rooms.

☒ **Yes** | ☐ No - We swayed with the chairs, beds, etc...

☐ Yes | ☒ **No** - Freely suspended objects swayed?

☐ Yes | ☒ **No** - Light objects have been moved?

☐ Yes | ☒ **No** - Objects placed on top of furniture have fallen down?

☒ **Yes** | ☐ No - Doors and windows knocked?

☐ Yes | ☒ **No** - Windows broke?

☐ Yes | ☒ **No** - All the sleepers woke up?

☐ Yes | ☒ **No** - A few frightened people came out of the houses?

Remark:

### 4

☒ **Yes** | ☐ No - Frames have fallen off the walls?

☐ Yes | ☒ **No** - Dishes have broken?

☐ Yes | ☒ **No** - Furniture has been moved?

☐ Yes | ☒ **No** - Light furniture has been knocked over?

☐ Yes | ☒ **No** - Small fragments of plaster have fallen from ceilings and walls?

☒ **Yes** | ☐ No - Large numbers of people have left their homes in a hurry?

☐ Yes | ☒ **No** - Some people had the feeling that they were going to fall?

Remark:

### 5. In houses:

☐ Yes | ☒ **No** - Heavy pieces of furniture have been knocked over?

☐ Yes | ☒ **No** - Plastered ceiling have fallen down?

☐ Yes | ☒ **No** - Chimneys have collapsed?

☐ Yes | ☒ **No** - Walls were cracked?

☐ Yes | ☒ **No** - Landslides have occurred along the banks or embankments.

Remark: **50 à 60 cheminées ont été endommagées**

Additional comments:

## Official inquiry for SAINT-VAAST (BE)

Location: 50.452°N 4.16°E, at 5.7 km from the epicentre.

Imin: 6 - Imax: 6

### 1

☒ **Yes** | ☐ No - A small number of inhabitants, especially those on the upper floors of the houses, noticed a tremor accompanied by a noise comparable to that produced by a heavy car-truck launched at full speed.

Remark: **un grand nombres l'ont ressenti.**

☒ **Yes** | ☐ No - The trembling of movable objects?

### 2. A large number of people have observed

☒ **Yes** | ☐ No - The shock of glasses or crockery placed very close together?

☒ **Yes** | ☐ No - The shivering of windows and doors?

☒ **Yes** | ☐ No - The creaking of floors?

☒ **Yes** | ☐ No - The rustle of ceilings?

☒ **Yes** | ☐ No - A loud rumbling sound accompanied the shaking?

☒ **Yes** | ☐ No - A number of sleepers woke up?

Note:

### 3

☒ **Yes** | ☐ No - The tremor was perceived by people outdoors?

☒ **Yes** | ☐ No - Inside the houses, everyone was aware of it due to the shaking of the whole construction?

☒ **Yes** | ☐ No - It was as if a heavy vehicle, thrown at full speed, had bumped into the house or a heavy object had overturned in one of the rooms.

☒ **Yes** | ☐ No - We swayed with the chairs, beds, etc...

☒ **Yes** | ☐ No - Freely suspended objects swayed?

☒ **Yes** | ☐ No - Light objects have been moved?

☒ **Yes** | ☐ No - Objects placed on top of furniture have fallen down?

☐ Yes | ☒ **No** - Doors and windows knocked?

☒ **Yes** | ☐ No - Windows broke?

☒ **Yes** | ☐ No - All the sleepers woke up?

☒ **Yes** | ☐ No - A few frightened people came out of the houses?

Remark:

### 4

☒ **Yes** | ☐ No - Frames have fallen off the walls?

☒ **Yes** | ☐ No - Dishes have broken?

☐ Yes | ☒ **No** - Furniture has been moved?

☐ Yes | ☒ **No** - Light furniture has been knocked over?

☒ **Yes** | ☐ No - Small fragments of plaster have fallen from ceilings and walls?

☒ **Yes** | ☐ No - Large numbers of people have left their homes in a hurry?

☒ **Yes** | ☐ No - Some people had the feeling that they were going to fall?

Remark:

### 5. In houses:

☐ Yes | ☒ **No** - Heavy pieces of furniture have been knocked over?

☐ Yes | ☒ **No** - Plastered ceiling have fallen down?

☒ **Yes** | ☐ No - Chimneys have collapsed?

☒ **Yes** | ☐ No - Walls were cracked?

☐ Yes | ☒ **No** - Landslides have occurred along the banks or embankments.

Remark:

Additional comments: **le coq surmontant le clocher de l'église historique de St Vaast est tombé un linteau de fenêtre en pierre bleue situé au 2ème étage d'une habitation s'est brisé et est tombé sur la voie publique**

## Official inquiry for SARS-LA-BRUYERE (BE)

Location: 50.371°N 3.879°E, at 17.3 km from the epicentre.

Imin: 2 - Imax: 2

### 1

☐ Yes | ☒ **No** - A small number of inhabitants, especially those on the upper floors of the houses, noticed a tremor accompanied by a noise comparable to that produced by a heavy car-truck launched at full speed.

Remark: **peu de personnes remarqué un ébranlement accompagné par un bruit d'orage lointain**

☐ Yes | ☒ **No** - The trembling of movable objects?

### 2. A large number of people have observed

☐ Yes | ☒ **No** - The shock of glasses or crockery placed very close together?

☐ Yes | ☒ **No** - The shivering of windows and doors?

☐ Yes | ☒ **No** - The creaking of floors?

☐ Yes | ☒ **No** - The rustle of ceilings?

☐ Yes | ☒ **No** - A loud rumbling sound accompanied the shaking?

☐ Yes | ☒ **No** - A number of sleepers woke up?

Note:

### 3

☐ Yes | ☒ **No** - The tremor was perceived by people outdoors?

☐ Yes | ☒ **No** - Inside the houses, everyone was aware of it due to the shaking of the whole construction?

☐ Yes | ☒ **No** - It was as if a heavy vehicle, thrown at full speed, had bumped into the house or a heavy object had overturned in one of the rooms.

☒ **Yes** | ☐ **No** - We swayed with the chairs, beds, etc...

☐ Yes | ☒ **No** - Freely suspended objects swayed?

☐ Yes | ☒ **No** - Light objects have been moved?

☐ Yes | ☒ **No** - Objects placed on top of furniture have fallen down?

☐ Yes | ☒ **No** - Doors and windows knocked?

☐ Yes | ☒ **No** - Windows broke?

☐ Yes | ☒ **No** - All the sleepers woke up?

☐ Yes | ☒ **No** - A few frightened people came out of the houses?

Remark:

### 4

☐ Yes | ☒ **No** - Frames have fallen off the walls?

☐ Yes | ☒ **No** - Dishes have broken?

☐ Yes | ☒ **No** - Furniture has been moved?

☐ Yes | ☒ **No** - Light furniture has been knocked over?

☐ Yes | ☒ **No** - Small fragments of plaster have fallen from ceilings and walls?

☐ Yes | ☒ **No** - Large numbers of people have left their homes in a hurry?

☐ Yes | ☒ **No** - Some people had the feeling that they were going to fall?

Remark:

### 5. In houses:

☐ Yes | ☒ **No** - Heavy pieces of furniture have been knocked over?

☐ Yes | ☒ **No** - Plastered ceiling have fallen down?

☐ Yes | ☒ **No** - Chimneys have collapsed?

☐ Yes | ☒ **No** - Walls were cracked?

☐ Yes | ☒ **No** - Landslides have occurred along the banks or embankments.

Remark:

Additional comments: **le séisme a été à peine ressenti dans la commune et par peu de personnes.**

## Official inquiry for SILLY (BE)

Location: 50.649°N 3.591°E, at 40.5 km from the epicentre.

**Imin: 2 - Imax: 2**

---

### 1

☒ **Yes** | ☐ **No** - A small number of inhabitants, especially those on the upper floors of the houses, noticed a tremor accompanied by a noise comparable to that produced by a heavy car-truck launched at full speed.

Remark:

☐ Yes | ☒ **No** - The trembling of movable objects?

### 2. A large number of people have observed

☐ Yes | ☒ **No** - The shock of glasses or crockery placed very close together?

☐ Yes | ☒ **No** - The shivering of windows and doors?

☐ Yes | ☒ **No** - The creaking of floors?

☐ Yes | ☒ **No** - The rustle of ceilings?

☐ Yes | ☒ **No** - A loud rumbling sound accompanied the shaking?

☐ Yes | ☒ **No** - A number of sleepers woke up?

Note:

### 3

☐ Yes | ☒ **No** - The tremor was perceived by people outdoors?

☐ Yes | ☒ **No** - Inside the houses, everyone was aware of it due to the shaking of the whole construction?

☐ Yes | ☒ **No** - It was as if a heavy vehicle, thrown at full speed, had bumped into the house or a heavy object had overturned in one of the rooms.

☐ Yes | ☒ **No** - We swayed with the chairs, beds, etc...

☐ Yes | ☒ **No** - Freely suspended objects swayed?

☐ Yes | ☒ **No** - Light objects have been moved?

☐ Yes | ☒ **No** - Objects placed on top of furniture have fallen down?

☐ Yes | ☒ **No** - Doors and windows knocked?

☐ Yes | ☒ **No** - Windows broke?

☐ Yes | ☒ **No** - All the sleepers woke up?

☐ Yes | ☒ **No** - A few frightened people came out of the houses?

Remark:

### 4

☐ Yes | ☒ **No** - Frames have fallen off the walls?

☐ Yes | ☒ **No** - Dishes have broken?

☐ Yes | ☒ **No** - Furniture has been moved?

☐ Yes | ☒ **No** - Light furniture has been knocked over?

☐ Yes | ☒ **No** - Small fragments of plaster have fallen from ceilings and walls?

☐ Yes | ☒ **No** - Large numbers of people have left their homes in a hurry?

☐ Yes | ☒ **No** - Some people had the feeling that they were going to fall?

Remark:

### 5. In houses:

☐ Yes | ☒ **No** - Heavy pieces of furniture have been knocked over?

☐ Yes | ☒ **No** - Plastered ceiling have fallen down?

☐ Yes | ☒ **No** - Chimneys have collapsed?

☐ Yes | ☒ **No** - Walls were cracked?

☐ Yes | ☒ **No** - Landslides have occurred along the banks or embankments.

Remark:

Additional comments:

## Official inquiry for SOIGNIES (BE)

Location: 50.586°N 4.072°E, at 14.0 km from the epicentre.

**Imin: 4 - Imax: 4**

### 1

☐ Yes | ☒ **No** - A small number of inhabitants, especially those on the upper floors of the houses, noticed a tremor accompanied by a noise comparable to that produced by a heavy car-truck launched at full speed.

Remark:

☒ **Yes** | ☐ No - The trembling of movable objects?

### 2. A large number of people have observed

☒ **Yes** | ☐ No - The shock of glasses or crockery placed very close together?

☒ **Yes** | ☐ No - The shivering of windows and doors?

☒ **Yes** | ☐ No - The creaking of floors?

☒ **Yes** | ☐ No - The rustle of ceilings?

☒ **Yes** | ☐ No - A loud rumbling sound accompanied the shaking?

☒ **Yes** | ☐ No - A number of sleepers woke up?

Note:

### 3

☐ Yes | ☒ **No** - The tremor was perceived by people outdoors?

☐ Yes | ☒ **No** - Inside the houses, everyone was aware of it due to the shaking of the whole construction?

☐ Yes | ☒ **No** - It was as if a heavy vehicle, thrown at full speed, had bumped into the house or a heavy object had overturned in one of the rooms.

☒ **Yes** | ☐ No - We swayed with the chairs, beds, etc...

☐ Yes | ☒ **No** - Freely suspended objects swayed?

☐ Yes | ☒ **No** - Light objects have been moved?

☐ Yes | ☒ **No** - Objects placed on top of furniture have fallen down?

☐ Yes | ☒ **No** - Doors and windows knocked?

☐ Yes | ☒ **No** - Windows broke?

☐ Yes | ☒ **No** - All the sleepers woke up?

☐ Yes | ☒ **No** - A few frightened people came out of the houses?

Remark:

### 4

☐ Yes | ☒ **No** - Frames have fallen off the walls?

☐ Yes | ☒ **No** - Dishes have broken?

☐ Yes | ☒ **No** - Furniture has been moved?

☐ Yes | ☒ **No** - Light furniture has been knocked over?

☐ Yes | ☒ **No** - Small fragments of plaster have fallen from ceilings and walls?

☐ Yes | ☒ **No** - Large numbers of people have left their homes in a hurry?

☐ Yes | ☒ **No** - Some people had the feeling that they were going to fall?

Remark:

### 5. In houses:

☐ Yes | ☒ **No** - Heavy pieces of furniture have been knocked over?

☐ Yes | ☒ **No** - Plastered ceiling have fallen down?

☐ Yes | ☒ **No** - Chimneys have collapsed?

☐ Yes | ☒ **No** - Walls were cracked?

☐ Yes | ☒ **No** - Landslides have occurred along the banks or embankments.

Remark:

Additional comments:

## Official inquiry for SOUVRET (BE)

Location: 50.451°N 4.352°E, at 19.3 km from the epicentre.

**Imin: 2 - Imax: 2**

### 1

☒ **Yes** | ☐ **No** - A small number of inhabitants, especially those on the upper floors of the houses, noticed a tremor accompanied by a noise comparable to that produced by a heavy car-truck launched at full speed.

Remark: **oui, une seule secousse**

☐ Yes | ☒ **No** - The trembling of movable objects?

### 2. A large number of people have observed

☐ Yes | ☒ **No** - The shock of glasses or crockery placed very close together?

☐ Yes | ☒ **No** - The shivering of windows and doors?

☐ Yes | ☒ **No** - The creaking of floors?

☐ Yes | ☒ **No** - The rustle of ceilings?

☐ Yes | ☒ **No** - A loud rumbling sound accompanied the shaking?

☐ Yes | ☒ **No** - A number of sleepers woke up?

Note:

### 3

☐ Yes | ☒ **No** - The tremor was perceived by people outdoors?

☐ Yes | ☒ **No** - Inside the houses, everyone was aware of it due to the shaking of the whole construction?

☐ Yes | ☒ **No** - It was as if a heavy vehicle, thrown at full speed, had bumped into the house or a heavy object had overturned in one of the rooms.

☐ Yes | ☒ **No** - We swayed with the chairs, beds, etc...

☐ Yes | ☒ **No** - Freely suspended objects swayed?

☐ Yes | ☒ **No** - Light objects have been moved?

☐ Yes | ☒ **No** - Objects placed on top of furniture have fallen down?

☐ Yes | ☒ **No** - Doors and windows knocked?

☐ Yes | ☒ **No** - Windows broke?

☐ Yes | ☒ **No** - All the sleepers woke up?

☐ Yes | ☒ **No** - A few frightened people came out of the houses?

Remark:

### 4

☐ Yes | ☒ **No** - Frames have fallen off the walls?

☐ Yes | ☒ **No** - Dishes have broken?

☐ Yes | ☒ **No** - Furniture has been moved?

☐ Yes | ☒ **No** - Light furniture has been knocked over?

☐ Yes | ☒ **No** - Small fragments of plaster have fallen from ceilings and walls?

☐ Yes | ☒ **No** - Large numbers of people have left their homes in a hurry?

☐ Yes | ☒ **No** - Some people had the feeling that they were going to fall?

Remark:

### 5. In houses:

☐ Yes | ☒ **No** - Heavy pieces of furniture have been knocked over?

☐ Yes | ☒ **No** - Plastered ceiling have fallen down?

☐ Yes | ☒ **No** - Chimneys have collapsed?

☐ Yes | ☒ **No** - Walls were cracked?

☐ Yes | ☒ **No** - Landslides have occurred along the banks or embankments.

Remark:

Additional comments:

## Official inquiry for SPIENNES (BE)

Location: 50.426°N 3.988°E, at 7.6 km from the epicentre.

**Imin: 5 - Imax: 5**

---

### 1

☐ Yes | ☒ **No** - A small number of inhabitants, especially those on the upper floors of the houses, noticed a tremor accompanied by a noise comparable to that produced by a heavy car-truck launched at full speed.

Remark:

☒ **Yes** | ☐ No - The trembling of movable objects?

### 2. A large number of people have observed

☒ **Yes** | ☐ No - The shock of glasses or crockery placed very close together?

☒ **Yes** | ☐ No - The shivering of windows and doors?

☐ Yes | ☒ **No** - The creaking of floors?

☐ Yes | ☒ **No** - The rustle of ceilings?

☒ **Yes** | ☐ No - A loud rumbling sound accompanied the shaking?

☐ Yes | ☒ **No** - A number of sleepers woke up?

Note:

### 3

☒ **Yes** | ☐ No - The tremor was perceived by people outdoors?

☒ **Yes** | ☐ No - Inside the houses, everyone was aware of it due to the shaking of the whole construction?

☐ Yes | ☒ **No** - It was as if a heavy vehicle, thrown at full speed, had bumped into the house or a heavy object had overturned in one of the rooms.

☒ **Yes** | ☐ No - We swayed with the chairs, beds, etc...

☐ Yes | ☒ **No** - Freely suspended objects swayed?

☐ Yes | ☒ **No** - Light objects have been moved?

☐ Yes | ☒ **No** - Objects placed on top of furniture have fallen down?

☐ Yes | ☒ **No** - Doors and windows knocked?

☐ Yes | ☒ **No** - Windows broke?

☐ Yes | ☒ **No** - All the sleepers woke up?

☒ **Yes** | ☐ No - A few frightened people came out of the houses?

Remark:

### 4

☐ Yes | ☒ **No** - Frames have fallen off the walls?

☐ Yes | ☒ **No** - Dishes have broken?

☐ Yes | ☒ **No** - Furniture has been moved?

☐ Yes | ☒ **No** - Light furniture has been knocked over?

☐ Yes | ☒ **No** - Small fragments of plaster have fallen from ceilings and walls?

☒ **Yes** | ☐ No - Large numbers of people have left their homes in a hurry?

☐ Yes | ☒ **No** - Some people had the feeling that they were going to fall?

Remark:

### 5. In houses:

☐ Yes | ☒ **No** - Heavy pieces of furniture have been knocked over?

☐ Yes | ☒ **No** - Plastered ceiling have fallen down?

☒ **Yes** | ☐ No - Chimneys have collapsed?

☐ Yes | ☒ **No** - Walls were cracked?

☐ Yes | ☒ **No** - Landslides have occurred along the banks or embankments.

Remark:

Additional comments:

## Official inquiry for STREPY-BRACQUEGNIES (BE)

Location: 50.475°N 4.124°E, at 3.5 km from the epicentre.

**Imin: 6 - Imax: 6**

### 1

☐ Yes | ☒ **No** - A small number of inhabitants, especially those on the upper floors of the houses, noticed a tremor accompanied by a noise comparable to that produced by a heavy car-truck launched at full speed.

Remark:

☒ **Yes** | ☐ No - The trembling of movable objects?

### 2. A large number of people have observed

☒ **Yes** | ☐ No - The shock of glasses or crockery placed very close together?

☒ **Yes** | ☐ No - The shivering of windows and doors?

☒ **Yes** | ☐ No - The creaking of floors?

☒ **Yes** | ☐ No - The rustle of ceilings?

☒ **Yes** | ☐ No - A loud rumbling sound accompanied the shaking?

☒ **Yes** | ☐ No - A number of sleepers woke up?

Note:

### 3

☒ **Yes** | ☐ No - The tremor was perceived by people outdoors?

☒ **Yes** | ☐ No - Inside the houses, everyone was aware of it due to the shaking of the whole construction?

☒ **Yes** | ☐ No - It was as if a heavy vehicle, thrown at full speed, had bumped into the house or a heavy object had overturned in one of the rooms.

☒ **Yes** | ☐ No - We swayed with the chairs, beds, etc...

☒ **Yes** | ☐ No - Freely suspended objects swayed?

☒ **Yes** | ☐ No - Light objects have been moved?

☒ **Yes** | ☐ No - Objects placed on top of furniture have fallen down?

☒ **Yes** | ☐ No - Doors and windows knocked?

☐ Yes | ☒ **No** - Windows broke?

☐ Yes | ☒ **No** - All the sleepers woke up?

☒ **Yes** | ☐ No - A few frightened people came out of the houses?

Remark: **sur tout le territoire, tous les habitants effrayés sont sortis des habitations**

### 4

☐ Yes | ☒ **No** - Frames have fallen off the walls?

☐ Yes | ☒ **No** - Dishes have broken?

☐ Yes | ☒ **No** - Furniture has been moved?

☐ Yes | ☒ **No** - Light furniture has been knocked over?

☐ Yes | ☒ **No** - Small fragments of plaster have fallen from ceilings and walls?

☒ **Yes** | ☐ No - Large numbers of people have left their homes in a hurry?

☒ **Yes** | ☐ No - Some people had the feeling that they were going to fall?

Remark:

### 5. In houses:

☐ Yes | ☒ **No** - Heavy pieces of furniture have been knocked over?

☐ Yes | ☒ **No** - Plastered ceiling have fallen down?

☒ **Yes** | ☐ No - Chimneys have collapsed?

☐ Yes | ☒ **No** - Walls were cracked?

☐ Yes | ☒ **No** - Landslides have occurred along the banks or embankments.

Remark:

Additional comments:

## Official inquiry for THIEU (BE)

Location: 50.473°N 4.093°E, at 1.8 km from the epicentre.

**Imin: 5 - Imax: 5**

### 1

☐ Yes | ☒ **No** - A small number of inhabitants, especially those on the upper floors of the houses, noticed a tremor accompanied by a noise comparable to that produced by a heavy car-truck launched at full speed.

Remark:

☒ **Yes** | ☐ No - The trembling of movable objects?

### 2. A large number of people have observed

☒ **Yes** | ☐ No - The shock of glasses or crockery placed very close together?

☒ **Yes** | ☐ No - The shivering of windows and doors?

☒ **Yes** | ☐ No - The creaking of floors?

☒ **Yes** | ☐ No - The rustle of ceilings?

☒ **Yes** | ☐ No - A loud rumbling sound accompanied the shaking?

☒ **Yes** | ☐ No - A number of sleepers woke up?

Note:

### 3

☒ **Yes** | ☐ No - The tremor was perceived by people outdoors?

☒ **Yes** | ☐ No - Inside the houses, everyone was aware of it due to the shaking of the whole construction?

☒ **Yes** | ☐ No - It was as if a heavy vehicle, thrown at full speed, had bumped into the house or a heavy object had overturned in one of the rooms.

☒ **Yes** | ☐ No - We swayed with the chairs, beds, etc...

☒ **Yes** | ☐ No - Freely suspended objects swayed?

☒ **Yes** | ☐ No - Light objects have been moved?

☐ Yes | ☒ **No** - Objects placed on top of furniture have fallen down?

☒ **Yes** | ☐ No - Doors and windows knocked?

☐ Yes | ☒ **No** - Windows broke?

☐ Yes | ☒ **No** - All the sleepers woke up?

☒ **Yes** | ☐ No - A few frightened people came out of the houses?

Remark:

### 4

☐ Yes | ☒ **No** - Frames have fallen off the walls?

☐ Yes | ☒ **No** - Dishes have broken?

☐ Yes | ☒ **No** - Furniture has been moved?

☐ Yes | ☒ **No** - Light furniture has been knocked over?

☐ Yes | ☒ **No** - Small fragments of plaster have fallen from ceilings and walls?

☐ Yes | ☒ **No** - Large numbers of people have left their homes in a hurry?

☐ Yes | ☒ **No** - Some people had the feeling that they were going to fall?

Remark:

### 5. In houses:

☐ Yes | ☒ **No** - Heavy pieces of furniture have been knocked over?

☐ Yes | ☒ **No** - Plastered ceiling have fallen down?

☒ **Yes** | ☐ No - Chimneys have collapsed?

☐ Yes | ☒ **No** - Walls were cracked?

☐ Yes | ☒ **No** - Landslides have occurred along the banks or embankments.

Remark:

Additional comments:

## Official inquiry for THIEUSIES (BE)

Location: 50.515°N 4.05°E, at 6.5 km from the epicentre.

**Imin: 5 - Imax: 5**

### 1

☐ Yes | ☒ **No** - A small number of inhabitants, especially those on the upper floors of the houses, noticed a tremor accompanied by a noise comparable to that produced by a heavy car-truck launched at full speed.

Remark:

☒ **Yes** | ☐ No - The trembling of movable objects?

### 2. A large number of people have observed

☒ **Yes** | ☐ No - The shock of glasses or crockery placed very close together?

☒ **Yes** | ☐ No - The shivering of windows and doors?

☒ **Yes** | ☐ No - The creaking of floors?

☒ **Yes** | ☐ No - The rustle of ceilings?

☒ **Yes** | ☐ No - A loud rumbling sound accompanied the shaking?

☒ **Yes** | ☐ No - A number of sleepers woke up?

Note:

### 3

☐ Yes | ☒ **No** - The tremor was perceived by people outdoors?

☒ **Yes** | ☐ No - Inside the houses, everyone was aware of it due to the shaking of the whole construction?

☒ **Yes** | ☐ No - It was as if a heavy vehicle, thrown at full speed, had bumped into the house or a heavy object had overturned in one of the rooms.

☒ **Yes** | ☐ No - We swayed with the chairs, beds, etc...

☒ **Yes** | ☐ No - Freely suspended objects swayed?

☒ **Yes** | ☐ No - Light objects have been moved?

☐ Yes | ☒ **No** - Objects placed on top of furniture have fallen down?

☒ **Yes** | ☐ No - Doors and windows knocked?

☐ Yes | ☒ **No** - Windows broke?

☒ **Yes** | ☐ No - All the sleepers woke up?

☒ **Yes** | ☐ No - A few frightened people came out of the houses?

Remark:

### 4

☐ Yes | ☒ **No** - Frames have fallen off the walls?

☐ Yes | ☒ **No** - Dishes have broken?

☐ Yes | ☒ **No** - Furniture has been moved?

☐ Yes | ☒ **No** - Light furniture has been knocked over?

☒ **Yes** | ☐ No - Small fragments of plaster have fallen from ceilings and walls?

☒ **Yes** | ☐ No - Large numbers of people have left their homes in a hurry?

☒ **Yes** | ☐ No - Some people had the feeling that they were going to fall?

Remark:

### 5. In houses:

☐ Yes | ☒ **No** - Heavy pieces of furniture have been knocked over?

☐ Yes | ☒ **No** - Plastered ceiling have fallen down?

☐ Yes | ☒ **No** - Chimneys have collapsed?

☐ Yes | ☒ **No** - Walls were cracked?

☐ Yes | ☒ **No** - Landslides have occurred along the banks or embankments.

Remark:

Additional comments:

## Official inquiry for TRAZEGNIES (BE)

Location: 50.47°N 4.33°E, at 17.8 km from the epicentre.

**Imin: 3 - Imax: 3**

---

### 1

☐ Yes | ☒ **No** - A small number of inhabitants, especially those on the upper floors of the houses, noticed a tremor accompanied by a noise comparable to that produced by a heavy car-truck launched at full speed.

Remark:

☐ Yes | ☒ **No** - The trembling of movable objects?

### 2. A large number of people have observed

☐ Yes | ☒ **No** - The shock of glasses or crockery placed very close together?

☐ Yes | ☒ **No** - The shivering of windows and doors?

☐ Yes | ☒ **No** - The creaking of floors?

☐ Yes | ☒ **No** - The rustle of ceilings?

☐ Yes | ☒ **No** - A loud rumbling sound accompanied the shaking?

☐ Yes | ☒ **No** - A number of sleepers woke up?

Note:

### 3

☐ Yes | ☒ **No** - The tremor was perceived by people outdoors?

☐ Yes | ☒ **No** - Inside the houses, everyone was aware of it due to the shaking of the whole construction?

☐ Yes | ☒ **No** - It was as if a heavy vehicle, thrown at full speed, had bumped into the house or a heavy object had overturned in one of the rooms.

☒ **Yes** | ☐ No - We swayed with the chairs, beds, etc...

☐ Yes | ☒ **No** - Freely suspended objects swayed?

☐ Yes | ☒ **No** - Light objects have been moved?

☐ Yes | ☒ **No** - Objects placed on top of furniture have fallen down?

☐ Yes | ☒ **No** - Doors and windows knocked?

☐ Yes | ☒ **No** - Windows broke?

☒ **Yes** | ☐ No - All the sleepers woke up?

☐ Yes | ☒ **No** - A few frightened people came out of the houses?

Remark:

### 4

☐ Yes | ☒ **No** - Frames have fallen off the walls?

☐ Yes | ☒ **No** - Dishes have broken?

☐ Yes | ☒ **No** - Furniture has been moved?

☐ Yes | ☒ **No** - Light furniture has been knocked over?

☐ Yes | ☒ **No** - Small fragments of plaster have fallen from ceilings and walls?

☐ Yes | ☒ **No** - Large numbers of people have left their homes in a hurry?

☐ Yes | ☒ **No** - Some people had the feeling that they were going to fall?

Remark:

### 5. In houses:

☐ Yes | ☒ **No** - Heavy pieces of furniture have been knocked over?

☐ Yes | ☒ **No** - Plastered ceiling have fallen down?

☐ Yes | ☒ **No** - Chimneys have collapsed?

☐ Yes | ☒ **No** - Walls were cracked?

☐ Yes | ☒ **No** - Landslides have occurred along the banks or embankments.

Remark:

Additional comments:

# Official inquiry for TRIVIERES (BE)

Location: 50.448°N 4.147°E, at 4.9 km from the epicentre.

**Imin: 6 - Imax: 7**

## 1

☐ Yes | ☒ **No** - A small number of inhabitants, especially those on the upper floors of the houses, noticed a tremor accompanied by a noise comparable to that produced by a heavy car-truck launched at full speed.

Remark:

☒ **Yes** | ☐ No - The trembling of movable objects?

## 2. A large number of people have observed

☒ **Yes** | ☐ No - The shock of glasses or crockery placed very close together?

☒ **Yes** | ☐ No - The shivering of windows and doors?

☒ **Yes** | ☐ No - The creaking of floors?

☒ **Yes** | ☐ No - The rustle of ceilings?

☒ **Yes** | ☐ No - A loud rumbling sound accompanied the shaking?

☒ **Yes** | ☐ No - A number of sleepers woke up?

Note:

## 3

☐ Yes | ☒ **No** - The tremor was perceived by people outdoors?

☐ Yes | ☒ **No** - Inside the houses, everyone was aware of it due to the shaking of the whole construction?

☐ Yes | ☒ **No** - It was as if a heavy vehicle, thrown at full speed, had bumped into the house or a heavy object had overturned in one of the rooms.

☐ Yes | ☒ **No** - We swayed with the chairs, beds, etc...

☐ Yes | ☒ **No** - Freely suspended objects swayed?

☐ Yes | ☒ **No** - Light objects have been moved?

☐ Yes | ☒ **No** - Objects placed on top of furniture have fallen down?

☐ Yes | ☒ **No** - Doors and windows knocked?

☐ Yes | ☒ **No** - Windows broke?

☐ Yes | ☒ **No** - All the sleepers woke up?

☐ Yes | ☒ **No** - A few frightened people came out of the houses?

Remark:

## 4

☐ Yes | ☒ **No** - Frames have fallen off the walls?

☐ Yes | ☒ **No** - Dishes have broken?

☐ Yes | ☒ **No** - Furniture has been moved?

☐ Yes | ☒ **No** - Light furniture has been knocked over?

☐ Yes | ☒ **No** - Small fragments of plaster have fallen from ceilings and walls?

☐ Yes | ☒ **No** - Large numbers of people have left their homes in a hurry?

☐ Yes | ☒ **No** - Some people had the feeling that they were going to fall?

Remark:

## 5. In houses:

☐ Yes | ☒ **No** - Heavy pieces of furniture have been knocked over?

☒ **Yes** | ☐ No - Plastered ceiling have fallen down?

☒ **Yes** | ☐ No - Chimneys have collapsed?

☒ **Yes** | ☐ No - Walls were cracked?

☐ Yes | ☒ **No** - Landslides have occurred along the banks or embankments.

Remark:

Additional comments: **un bruit très fort semblable à l'eclatement d'une bombe se faisait entendre en même temps que les animaux (poules, chiens,vaches,...) pris de frayeur. les habitants sortirent dehors pour constater les éventuels dégâts. plusieurs cheminées s'écroulèrent, quelques murs eurent des lézardes et quelques plafonds s'effondrèrent**

## Official inquiry for VELLEREILLE-LE-SEC (BE)

Location: 50.402°N 4.058°E, at 6.7 km from the epicentre.

**Imin: 4 - Imax: 4**

### 1

☐ Yes | ☒ **No** - A small number of inhabitants, especially those on the upper floors of the houses, noticed a tremor accompanied by a noise comparable to that produced by a heavy car-truck launched at full speed.

Remark:

☒ **Yes** | ☐ No - The trembling of movable objects?

### 2. A large number of people have observed

☒ **Yes** | ☐ No - The shock of glasses or crockery placed very close together?

☒ **Yes** | ☐ No - The shivering of windows and doors?

☐ Yes | ☒ **No** - The creaking of floors?

☐ Yes | ☒ **No** - The rustle of ceilings?

☒ **Yes** | ☐ No - A loud rumbling sound accompanied the shaking?

☒ **Yes** | ☐ No - A number of sleepers woke up?

Note:

### 3

☒ **Yes** | ☐ No - The tremor was perceived by people outdoors?

☒ **Yes** | ☐ No - Inside the houses, everyone was aware of it due to the shaking of the whole construction?

☒ **Yes** | ☐ No - It was as if a heavy vehicle, thrown at full speed, had bumped into the house or a heavy object had overturned in one of the rooms.

☐ Yes | ☒ **No** - We swayed with the chairs, beds, etc...

☐ Yes | ☒ **No** - Freely suspended objects swayed?

☐ Yes | ☒ **No** - Light objects have been moved?

☐ Yes | ☒ **No** - Objects placed on top of furniture have fallen down?

☐ Yes | ☒ **No** - Doors and windows knocked?

☐ Yes | ☒ **No** - Windows broke?

☐ Yes | ☒ **No** - All the sleepers woke up?

☐ Yes | ☒ **No** - A few frightened people came out of the houses?

Remark:

### 4

☐ Yes | ☒ **No** - Frames have fallen off the walls?

☐ Yes | ☒ **No** - Dishes have broken?

☐ Yes | ☒ **No** - Furniture has been moved?

☐ Yes | ☒ **No** - Light furniture has been knocked over?

☐ Yes | ☒ **No** - Small fragments of plaster have fallen from ceilings and walls?

☒ **Yes** | ☐ No - Large numbers of people have left their homes in a hurry?

☐ Yes | ☒ **No** - Some people had the feeling that they were going to fall?

Remark:

### 5. In houses:

☐ Yes | ☒ **No** - Heavy pieces of furniture have been knocked over?

☐ Yes | ☒ **No** - Plastered ceiling have fallen down?

☐ Yes | ☒ **No** - Chimneys have collapsed?

☐ Yes | ☒ **No** - Walls were cracked?

☐ Yes | ☒ **No** - Landslides have occurred along the banks or embankments.

Remark:

Additional comments:

# Official inquiry for VELLEREILLE-LES-BRAYEUX (BE)

Location: 50.38°N 4.152°E, at 10.3 km from the epicentre.

**Imin: 4 - Imax: 4**

## 1

☐ Yes | ☒ **No** - A small number of inhabitants, especially those on the upper floors of the houses, noticed a tremor accompanied by a noise comparable to that produced by a heavy car-truck launched at full speed.

Remark:

☒ **Yes** | ☐ No - The trembling of movable objects?

## 2. A large number of people have observed

☒ **Yes** | ☐ No - The shock of glasses or crockery placed very close together?

☐ Yes | ☒ **No** - The shivering of windows and doors?

☐ Yes | ☒ **No** - The creaking of floors?

☐ Yes | ☒ **No** - The rustle of ceilings?

☐ Yes | ☒ **No** - A loud rumbling sound accompanied the shaking?

☐ Yes | ☒ **No** - A number of sleepers woke up?

Note:

## 3

☐ Yes | ☒ **No** - The tremor was perceived by people outdoors?

☐ Yes | ☒ **No** - Inside the houses, everyone was aware of it due to the shaking of the whole construction?

☐ Yes | ☒ **No** - It was as if a heavy vehicle, thrown at full speed, had bumped into the house or a heavy object had overturned in one of the rooms.

☒ **Yes** | ☐ No - We swayed with the chairs, beds, etc...

☐ Yes | ☒ **No** - Freely suspended objects swayed?

☐ Yes | ☒ **No** - Light objects have been moved?

☐ Yes | ☒ **No** - Objects placed on top of furniture have fallen down?

☐ Yes | ☒ **No** - Doors and windows knocked?

☐ Yes | ☒ **No** - Windows broke?

☒ **Yes** | ☐ No - All the sleepers woke up?

☐ Yes | ☒ **No** - A few frightened people came out of the houses?

Remark:

## 4

☐ Yes | ☒ **No** - Frames have fallen off the walls?

☐ Yes | ☒ **No** - Dishes have broken?

☐ Yes | ☒ **No** - Furniture has been moved?

☐ Yes | ☒ **No** - Light furniture has been knocked over?

☐ Yes | ☒ **No** - Small fragments of plaster have fallen from ceilings and walls?

☐ Yes | ☒ **No** - Large numbers of people have left their homes in a hurry?

☐ Yes | ☒ **No** - Some people had the feeling that they were going to fall?

Remark:

## 5. In houses:

☐ Yes | ☒ **No** - Heavy pieces of furniture have been knocked over?

☐ Yes | ☒ **No** - Plastered ceiling have fallen down?

☐ Yes | ☒ **No** - Chimneys have collapsed?

☐ Yes | ☒ **No** - Walls were cracked?

☐ Yes | ☒ **No** - Landslides have occurred along the banks or embankments.

Remark:

Additional comments:

## Official inquiry for VIESVILLE (BE)

Location: 50.492°N 4.408°E, at 23.5 km from the epicentre.

**Imin: 3 - Imax: 3**

### 1

☒ **Yes** | ☐ **No** - A small number of inhabitants, especially those on the upper floors of the houses, noticed a tremor accompanied by a noise comparable to that produced by a heavy car-truck launched at full speed.

Remark:

☐ Yes | ☒ **No** - The trembling of movable objects?

### 2. A large number of people have observed

☐ Yes | ☒ **No** - The shock of glasses or crockery placed very close together?

☐ Yes | ☒ **No** - The shivering of windows and doors?

☐ Yes | ☒ **No** - The creaking of floors?

☐ Yes | ☒ **No** - The rustle of ceilings?

☐ Yes | ☒ **No** - A loud rumbling sound accompanied the shaking?

☐ Yes | ☒ **No** - A number of sleepers woke up?

Note:

### 3

☐ Yes | ☒ **No** - The tremor was perceived by people outdoors?

☐ Yes | ☒ **No** - Inside the houses, everyone was aware of it due to the shaking of the whole construction?

☐ Yes | ☒ **No** - It was as if a heavy vehicle, thrown at full speed, had bumped into the house or a heavy object had overturned in one of the rooms.

☐ Yes | ☒ **No** - We swayed with the chairs, beds, etc...

☐ Yes | ☒ **No** - Freely suspended objects swayed?

☐ Yes | ☒ **No** - Light objects have been moved?

☐ Yes | ☒ **No** - Objects placed on top of furniture have fallen down?

☐ Yes | ☒ **No** - Doors and windows knocked?

☐ Yes | ☒ **No** - Windows broke?

☐ Yes | ☒ **No** - All the sleepers woke up?

☐ Yes | ☒ **No** - A few frightened people came out of the houses?

Remark:

### 4

☐ Yes | ☒ **No** - Frames have fallen off the walls?

☐ Yes | ☒ **No** - Dishes have broken?

☐ Yes | ☒ **No** - Furniture has been moved?

☐ Yes | ☒ **No** - Light furniture has been knocked over?

☐ Yes | ☒ **No** - Small fragments of plaster have fallen from ceilings and walls?

☐ Yes | ☒ **No** - Large numbers of people have left their homes in a hurry?

☐ Yes | ☒ **No** - Some people had the feeling that they were going to fall?

Remark:

### 5. In houses:

☐ Yes | ☒ **No** - Heavy pieces of furniture have been knocked over?

☐ Yes | ☒ **No** - Plastered ceiling have fallen down?

☐ Yes | ☒ **No** - Chimneys have collapsed?

☐ Yes | ☒ **No** - Walls were cracked?

☐ Yes | ☒ **No** - Landslides have occurred along the banks or embankments.

Remark:

Additional comments:

## Official inquiry for VILLE-SUR-HAINE (BE)

Location: 50.479°N 4.061°E, at 2.5 km from the epicentre.

**Imin: 6 - Imax: 6**

**1**

☐ Yes | ☒ **No** - A small number of inhabitants, especially those on the upper floors of the houses, noticed a tremor accompanied by a noise comparable to that produced by a heavy car-truck launched at full speed.

Remark:

☒ **Yes** | ☐ No - The trembling of movable objects?

**2. A large number of people have observed**

☒ **Yes** | ☐ No - The shock of glasses or crockery placed very close together?

☒ **Yes** | ☐ No - The shivering of windows and doors?

☒ **Yes** | ☐ No - The creaking of floors?

☒ **Yes** | ☐ No - The rustle of ceilings?

☒ **Yes** | ☐ No - A loud rumbling sound accompanied the shaking?

☒ **Yes** | ☐ No - A number of sleepers woke up?

Note: **tout le monde a remarqué**

**3**

☒ **Yes** | ☐ No - The tremor was perceived by people outdoors?

☒ **Yes** | ☐ No - Inside the houses, everyone was aware of it due to the shaking of the whole construction?

☐ Yes | ☒ **No** - It was as if a heavy vehicle, thrown at full speed, had bumped into the house or a heavy object had overturned in one of the rooms.

☐ Yes | ☒ **No** - We swayed with the chairs, beds, etc...

☐ Yes | ☒ **No** - Freely suspended objects swayed?

☐ Yes | ☒ **No** - Light objects have been moved?

☐ Yes | ☒ **No** - Objects placed on top of furniture have fallen down?

☒ **Yes** | ☐ No - Doors and windows knocked?

☒ **Yes** | ☐ No - Windows broke?

☐ Yes | ☒ **No** - All the sleepers woke up?

☐ Yes | ☒ **No** - A few frightened people came out of the houses?

Remark:

**4**

☒ **Yes** | ☐ No - Frames have fallen off the walls?

☐ Yes | ☒ **No** - Dishes have broken?

☐ Yes | ☒ **No** - Furniture has been moved?

☐ Yes | ☒ **No** - Light furniture has been knocked over?

☐ Yes | ☒ **No** - Small fragments of plaster have fallen from ceilings and walls?

☒ **Yes** | ☐ No - Large numbers of people have left their homes in a hurry?

☐ Yes | ☒ **No** - Some people had the feeling that they were going to fall?

Remark:

**5. In houses:**

☐ Yes | ☒ **No** - Heavy pieces of furniture have been knocked over?

☒ **Yes** | ☐ No - Plastered ceiling have fallen down?

☒ **Yes** | ☐ No - Chimneys have collapsed?

☒ **Yes** | ☐ No - Walls were cracked?

☐ Yes | ☒ **No** - Landslides have occurred along the banks or embankments.

Remark:

Additional comments:

## Official inquiry for VILLERS-SAINT-GHISLAIN (BE)

Location: 50.429°N 4.041°E, at 4.4 km from the epicentre.

**Imin: 6 - Imax: 6**

---

### 1

☐ Yes | ☒ **No** - A small number of inhabitants, especially those on the upper floors of the houses, noticed a tremor accompanied by a noise comparable to that produced by a heavy car-truck launched at full speed.

Remark:

☒ **Yes** | ☐ No - The trembling of movable objects?

### 2. A large number of people have observed

☒ **Yes** | ☐ No - The shock of glasses or crockery placed very close together?

☒ **Yes** | ☐ No - The shivering of windows and doors?

☒ **Yes** | ☐ No - The creaking of floors?

☒ **Yes** | ☐ No - The rustle of ceilings?

☒ **Yes** | ☐ No - A loud rumbling sound accompanied the shaking?

☒ **Yes** | ☐ No - A number of sleepers woke up?

Note:

### 3

☐ Yes | ☒ **No** - The tremor was perceived by people outdoors?

☒ **Yes** | ☐ No - Inside the houses, everyone was aware of it due to the shaking of the whole construction?

☒ **Yes** | ☐ No - It was as if a heavy vehicle, thrown at full speed, had bumped into the house or a heavy object had overturned in one of the rooms.

☒ **Yes** | ☐ No - We swayed with the chairs, beds, etc...

☒ **Yes** | ☐ No - Freely suspended objects swayed?

☒ **Yes** | ☐ No - Light objects have been moved?

☒ **Yes** | ☐ No - Objects placed on top of furniture have fallen down?

☒ **Yes** | ☐ No - Doors and windows knocked?

☐ Yes | ☒ **No** - Windows broke?

☐ Yes | ☒ **No** - All the sleepers woke up?

☒ **Yes** | ☐ No - A few frightened people came out of the houses?

Remark:

### 4

☒ **Yes** | ☐ No - Frames have fallen off the walls?

☒ **Yes** | ☐ No - Dishes have broken?

☐ Yes | ☒ **No** - Furniture has been moved?

☐ Yes | ☒ **No** - Light furniture has been knocked over?

☒ **Yes** | ☐ No - Small fragments of plaster have fallen from ceilings and walls?

☒ **Yes** | ☐ No - Large numbers of people have left their homes in a hurry?

☒ **Yes** | ☐ No - Some people had the feeling that they were going to fall?

Remark:

### 5. In houses:

☐ Yes | ☒ **No** - Heavy pieces of furniture have been knocked over?

☐ Yes | ☒ **No** - Plastered ceiling have fallen down?

☒ **Yes** | ☐ No - Chimneys have collapsed?

☒ **Yes** | ☐ No - Walls were cracked?

☐ Yes | ☒ **No** - Landslides have occurred along the banks or embankments.

Remark:

Additional comments:

## Official inquiry for WASMES (BE)

Location: 50.422°N 3.847°E, at 17.1 km from the epicentre.

**Imin: 3 - Imax: 3**

---

### 1

☒ **Yes** | ☐ **No** - A small number of inhabitants, especially those on the upper floors of the houses, noticed a tremor accompanied by a noise comparable to that produced by a heavy car-truck launched at full speed.

Remark:

☐ Yes | ☒ **No** - The trembling of movable objects?

### 2. A large number of people have observed

☐ Yes | ☒ **No** - The shock of glasses or crockery placed very close together?

☐ Yes | ☒ **No** - The shivering of windows and doors?

☐ Yes | ☒ **No** - The creaking of floors?

☐ Yes | ☒ **No** - The rustle of ceilings?

☐ Yes | ☒ **No** - A loud rumbling sound accompanied the shaking?

☐ Yes | ☒ **No** - A number of sleepers woke up?

Note:

### 3

☐ Yes | ☒ **No** - The tremor was perceived by people outdoors?

☐ Yes | ☒ **No** - Inside the houses, everyone was aware of it due to the shaking of the whole construction?

☐ Yes | ☒ **No** - It was as if a heavy vehicle, thrown at full speed, had bumped into the house or a heavy object had overturned in one of the rooms.

☐ Yes | ☒ **No** - We swayed with the chairs, beds, etc...

☐ Yes | ☒ **No** - Freely suspended objects swayed?

☐ Yes | ☒ **No** - Light objects have been moved?

☐ Yes | ☒ **No** - Objects placed on top of furniture have fallen down?

☐ Yes | ☒ **No** - Doors and windows knocked?

☐ Yes | ☒ **No** - Windows broke?

☐ Yes | ☒ **No** - All the sleepers woke up?

☐ Yes | ☒ **No** - A few frightened people came out of the houses?

Remark:

### 4

☐ Yes | ☒ **No** - Frames have fallen off the walls?

☐ Yes | ☒ **No** - Dishes have broken?

☐ Yes | ☒ **No** - Furniture has been moved?

☐ Yes | ☒ **No** - Light furniture has been knocked over?

☐ Yes | ☒ **No** - Small fragments of plaster have fallen from ceilings and walls?

☐ Yes | ☒ **No** - Large numbers of people have left their homes in a hurry?

☐ Yes | ☒ **No** - Some people had the feeling that they were going to fall?

Remark:

### 5. In houses:

☐ Yes | ☒ **No** - Heavy pieces of furniture have been knocked over?

☐ Yes | ☒ **No** - Plastered ceiling have fallen down?

☐ Yes | ☒ **No** - Chimneys have collapsed?

☐ Yes | ☒ **No** - Walls were cracked?

☐ Yes | ☒ **No** - Landslides have occurred along the banks or embankments.

Remark:

Additional comments:

# Official inquiry for WAUDREZ (BE)

Location: 50.413°N 4.152°E, at 7.3 km from the epicentre.

**Imin: 4 - Imax: 4**

## 1

☐ Yes | ☒ **No** - A small number of inhabitants, especially those on the upper floors of the houses, noticed a tremor accompanied by a noise comparable to that produced by a heavy car-truck launched at full speed.

Remark:

☐ Yes | ☒ **No** - The trembling of movable objects?

## 2. A large number of people have observed

☐ Yes | ☒ **No** - The shock of glasses or crockery placed very close together?

☐ Yes | ☒ **No** - The shivering of windows and doors?

☐ Yes | ☒ **No** - The creaking of floors?

☐ Yes | ☒ **No** - The rustle of ceilings?

☐ Yes | ☒ **No** - A loud rumbling sound accompanied the shaking?

☐ Yes | ☒ **No** - A number of sleepers woke up?

Note:

## 3

☒ **Yes** | ☐ No - The tremor was perceived by people outdoors?

☒ **Yes** | ☐ No - Inside the houses, everyone was aware of it due to the shaking of the whole construction?

☒ **Yes** | ☐ No - It was as if a heavy vehicle, thrown at full speed, had bumped into the house or a heavy object had overturned in one of the rooms.

☒ **Yes** | ☐ No - We swayed with the chairs, beds, etc...

☒ **Yes** | ☐ No - Freely suspended objects swayed?

☒ **Yes** | ☐ No - Light objects have been moved?

☒ **Yes** | ☐ No - Objects placed on top of furniture have fallen down?

☒ **Yes** | ☐ No - Doors and windows knocked?

☒ **Yes** | ☐ No - Windows broke?

☒ **Yes** | ☐ No - All the sleepers woke up?

☒ **Yes** | ☐ No - A few frightened people came out of the houses?

Remark:

## 4

☐ Yes | ☒ **No** - Frames have fallen off the walls?

☐ Yes | ☒ **No** - Dishes have broken?

☐ Yes | ☒ **No** - Furniture has been moved?

☐ Yes | ☒ **No** - Light furniture has been knocked over?

☐ Yes | ☒ **No** - Small fragments of plaster have fallen from ceilings and walls?

☐ Yes | ☒ **No** - Large numbers of people have left their homes in a hurry?

☐ Yes | ☒ **No** - Some people had the feeling that they were going to fall?

Remark:

## 5. In houses:

☐ Yes | ☒ **No** - Heavy pieces of furniture have been knocked over?

☐ Yes | ☒ **No** - Plastered ceiling have fallen down?

☐ Yes | ☒ **No** - Chimneys have collapsed?

☐ Yes | ☒ **No** - Walls were cracked?

☐ Yes | ☒ **No** - Landslides have occurred along the banks or embankments.

Remark:

Additional comments:
