# Supplementary material for: The damaging character of shallow 20th century earthquakes in the Hainaut coal area (Belgium)
Source: Copernicus journal article supplement (doi:10.5194/se-2021-74), 2021-07-13
Supplement: Supplementary file 1 [file se-2021-74-supplement.zip › 538_1949-04-14_HAVRE-BOUSSOIT.csv]

Imin	Imax	lat	lon	Commune	d_epi	azimuth
0	0	50.4831	4.1511	HOUDENG-AIMERIES	6.3048503993	65.9171171804
0	0	50.4356	4.1456	PERONNES-LEZ-BINCHE	6.01667833485	116.785939295
4	4	50.4414	3.9664	HYON	7.64337396718	254.33432908
4	4	50.455	3.948	MONS	8.68143106093	266.373783373
4	4	50.4781	4.1903	LA LOUVIERE	8.77490561697	76.6888714016
0	0	50.47	4.15	BOIS-DU-LUC	5.78804615814	78.8887818598
0	0	50.4839	4.1564	HOUDENG-GOEGNIES	6.68505114924	66.5327087637
0	0	50.3836	4.0831	HAULCHIN	8.54936037727	173.743404866
0	0	50.4525	4.16	SAINT-VAAST	6.44556719013	97.4022577093
4	4	50.4747	4.1242	STREPY-BRACQUEGNIES	4.18112764289	66.9567282208
5	5	50.4794	4.0611	VILLE-SUR-HAINE	2.24861875507	343.683745888
5	5	50.4664	4.0467	HAVRE	1.80108140768	293.292131612
4	4	50.4128	4.1681	BINCHE	8.72584986313	126.954450881
4	4	50.4311	4.1075	BRAY	4.17490420173	140.341398268
0	0	50.4475	4.1467	TRIVIERES	5.62180461789	104.290328113
