# Supplementary material for: The damaging character of shallow 20th century earthquakes in the Hainaut coal area (Belgium)
Source: Copernicus journal article supplement (doi:10.5194/se-2021-74), 2021-07-13
Supplement: Supplementary file 1 [file se-2021-74-supplement.zip › 539_1949-04-14_HAVRE.csv]

Imin	Imax	lat	lon	Commune	d_epi	azimuth
0	0	50.4781	3.9025	GHLIN	11.3616578679	280.26807369
0	0	50.4831	4.1511	HOUDENG-AIMERIES	6.95915189712	68.2960859347
0	0	50.4356	4.1456	PERONNES-LEZ-BINCHE	6.65829031159	114.023794304
0	0	50.4414	3.9664	HYON	6.96231278313	252.748114709
4	5	50.455	3.948	MONS	7.97288904652	266.0429793
0	0	50.4733	3.9594	NIMY	7.29415320044	281.741231962
4	5	50.4781	4.1903	LA LOUVIERE	9.4673234173	77.6709294091
0	0	50.47	4.15	BOIS-DU-LUC	6.48626439938	80.090380769
0	0	50.4839	4.1564	HOUDENG-GOEGNIES	7.34184145218	68.7326804956
0	0	50.3836	4.0831	HAULCHIN	8.65562387736	169.058079087
5	5	50.4294	4.0406	VILLERS-SAINT-GHISLAIN	3.67223287284	202.047586431
0	0	50.4525	4.16	SAINT-VAAST	7.15033363816	96.6618373436
5	5	50.4747	4.0081	OBOURG	4.03134353331	293.95008907
5	6	50.4747	4.1242	STREPY-BRACQUEGNIES	4.84252961015	70.2399812893
5	6	50.4311	4.1075	BRAY	4.66030198572	133.597516853
6	6	50.4794	4.0611	VILLE-SUR-HAINE	2.15943178845	2.07208863243
5	5	50.4381	4.0072	SAINT-SYMPHORIEN	4.47194629162	237.012578981
6	6	50.4664	4.0467	HAVRE	1.18264593538	307.016592807
0	0	50.4128	4.1681	BINCHE	9.30312189474	124.316911394
0	0	50.4106	3.8942	FRAMERIES	12.9981731163	245.054864458
0	0	50.49	3.963	MAISIERES	7.65178303111	295.894405032
