# Supplementary material for: The damaging character of shallow 20th century earthquakes in the Hainaut coal area (Belgium)
Source: Copernicus journal article supplement (doi:10.5194/se-2021-74), 2021-07-13
Supplement: Supplementary file 1 [file se-2021-74-supplement.zip › 547_1952-10-21_QUAREGNON.csv]

Imin	Imax	lat	lon	Commune	d_epi	azimuth
3	3	50.4222	3.8467	WASMES	2.52035676848	249.876382592
2	2	50.4733	3.9594	NIMY	7.41615917296	49.4675206468
3	3	50.4053	3.8758	LA BOUVERIE	2.7637242962	186.202140892
4	4	50.4136	3.8622	PATURAGES	2.21995904778	214.74475771
2	2	50.4847	3.8356	BAUDOUR	6.85310592982	332.62471478
3	3	50.3931	3.9194	GENLY	4.96906529301	145.678848467
3	3	50.4342	3.8292	HORNU	3.63950761816	277.394885824
4	4	50.4381	3.92	CUESMES	2.98134126713	72.3935497404
3	3	50.4414	3.9664	HYON	6.2679692397	78.2943073595
3	3	50.445	3.803	BOUSSU	5.71912795569	286.992502559
4	4	50.4494	3.8878	JEMAPPES	2.22801177616	14.3976824812
3	4	50.455	3.948	MONS	5.573737616	60.0441463099
3	4	50.4106	3.8942	FRAMERIES	2.3823107849	154.931659024
3	3	50.4203	3.9447	CIPLY	4.72259492649	103.182448302
4	4	50.4431	3.8653	QUAREGNON	1.79280156569	324.377264341
3	3	50.4494	3.8878	FLENU	2.22801177616	14.3976824812
2	3	50.5892	3.88	CAMBRON-CASTEAU	17.7092281641	0.0
3	3	50.5	3.7833	ERBISOEUL	10.3813467023	318.633078736
3	3	50.557	3.902	LENS	14.2132882073	6.29725920353
3	3	50.427	3.961	MESVIN	5.76524252224	93.2871109096
3	3	50.412	3.969	NOUVELLES	6.63438363685	107.531553498
