# Supplementary material for: The damaging character of shallow 20th century earthquakes in the Hainaut coal area (Belgium)
Source: Copernicus journal article supplement (doi:10.5194/se-2021-74), 2021-07-13
Supplement: Supplementary file 1 [file se-2021-74-supplement.zip › 547_ROB_official_report.pdf]

# Royal Observatory of Belgium Official Macroseismic Inquiry

## QUAREGNON

1952-10-21 21:15:--

Magnitude  $M_w=3.1$

50.43°N 3.88°E [2.9] km

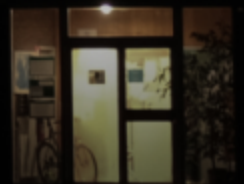



# Official Inquiries

|                    | Country | Latitude | Longitude | Epicentral Distance | Imin | Imax |
|--------------------|---------|----------|-----------|---------------------|------|------|
| <b>BOUSSU</b>      | BE      | 50.445   | 3.803     | 5.7                 | 3    | 3    |
| <b>CIPLY</b>       | BE      | 50.42    | 3.945     | 4.7                 | 3    | 3    |
| <b>CUESMES</b>     | BE      | 50.438   | 3.92      | 3                   | 4    | 4    |
| <b>ERBISOEUL</b>   | BE      | 50.515   | 3.898     | 10.4                | 3    | 3    |
| <b>FLENU</b>       | BE      | 50.449   | 3.888     | 2.2                 | 3    | 3    |
| <b>FRAMERIES</b>   | BE      | 50.411   | 3.894     | 2.4                 | 3    | 4    |
| <b>GENLY</b>       | BE      | 50.393   | 3.919     | 5                   | 3    | 3    |
| <b>HORNU</b>       | BE      | 50.434   | 3.829     | 3.6                 | 3    | 3    |
| <b>HYON</b>        | BE      | 50.441   | 3.966     | 6.3                 | 3    | 3    |
| <b>JEMAPPES</b>    | BE      | 50.449   | 3.888     | 2.2                 | 4    | 4    |
| <b>LA BOUVERIE</b> | BE      | 50.405   | 3.876     | 2.8                 | 3    | 3    |
| <b>LENS</b>        | BE      | 50.557   | 3.902     | 14.2                | 3    | 3    |
| <b>MESVIN</b>      | BE      | 50.427   | 3.961     | 5.8                 | 3    | 3    |
| <b>MONS</b>        | BE      | 50.455   | 3.948     | 5.6                 | 3    | 4    |
| <b>NIMY</b>        | BE      | 50.473   | 3.959     | 7.4                 | 2    | 2    |
| <b>NOUVELLES</b>   | BE      | 50.412   | 3.969     | 6.6                 | 3    | 3    |
| <b>PATURAGES</b>   | BE      | 50.414   | 3.862     | 2.2                 | 4    | 4    |
| <b>QUAREGNON</b>   | BE      | 50.443   | 3.865     | 1.8                 | 4    | 4    |
| <b>WASMES</b>      | BE      | 50.422   | 3.847     | 2.5                 | 3    | 3    |



# Additional Intensities from other sources

# Individual Formulaires

## Official inquiry for BOUSSU (BE)

Location: 50.445°N 3.803°E, at 5.7 km from the epicentre.

Imin: 3 - Imax: 3

### Did some residents perceive

- ☐ Yes | ☒ **No** - Light vibrations?  
☒ **Yes** | ☐ No - A characteristic noise: rumbling or rolling?

### Did many residents perceive

- ☐ Yes | ☒ **No** - A clear shaking of the building?  
☐ Yes | ☒ **No** - A loud rumble?

### Have we witnessed

- ☐ Yes | ☒ **No** - The oscillation of chandeliers or freely suspended objects?  
☐ Yes | ☒ **No** - Swinging chairs or beds?  
☐ Yes | ☒ **No** - Cracking ceilings?  
☐ Yes | ☒ **No** - Sleepers waking up?

### Has it been witnessed or later observed

- ☒ **Yes** | ☐ No - The shivering of windows and doors?  
☐ Yes | ☒ **No** - The shaking of movable objects (tables, vases, knick-knacks, ...)?

### Has it been witnessed or later observed

- ☒ **Yes** | ☐ No - The clattering of glasses and dishes in buffets?  
☐ Yes | ☒ **No** - The swaying of frames hanging on the wall?  
☐ Yes | ☒ **No** - The creaking of floors?  
☐ Yes | ☒ **No** - Small fragments of plaster falling from ceilings?  
☐ Yes | ☒ **No** - A confusion of the inhabitants (people leaving the house).

### Has it been observed

- ☐ Yes | ☒ **No** - Moving knick-knacks?  
☐ Yes | ☒ **No** - Moving light objects?  
 Which ones?:  
☐ Yes | ☒ **No** - The falling of frames hanging on the wall?  
☐ Yes | ☒ **No** - The falling of light objects placed on polished furniture or marble  
☐ Yes | ☒ **No** - Cracked or broken windows?  
☐ Yes | ☒ **No** - Broken crockery?  
☐ Yes | ☒ **No** - Light objects (vases, flower pots, etc.) spilled?  
☐ Yes | ☒ **No** - Has light furniture moved?  
☐ Yes | ☒ **No** - Has heavy furniture (chests, stoves, ...) vibrated?  
☐ Yes | ☒ **No** - Did bells tinkle?  
☐ Yes | ☒ **No** - Did heavy furniture move?  
☐ Yes | ☒ **No** - Did light furniture tip over?  
☐ Yes | ☒ **No** - Have doors been moved on their hinges?

### Has it been observed

- ☐ Yes | ☒ **No** - Falling pieces of plaster from the ceilings?  
☐ Yes | ☒ **No** - Cracks in wall plaster?  
☐ Yes | ☒ **No** - An exceptional fall of a chimney in poor condition?  
☐ Yes | ☒ **No** - An exceptional fall of some bricks?  
☐ Yes | ☒ **No** - Have there been several damaged chimneys?

How many?:

- ☐ Yes | ☒ **No** - Have there been several chimneys overturned?

How many?:

% for the municipality?:

- ☐ Yes | ☒ **No** - Have there been any falls of façade ornaments?

How important?:

- ☐ Yes | ☒ **No** - Have there been deep cracks in the brick walls?  
☐ Yes | ☒ **No** - Have there been deep cracks in the concrete walls?  
☐ Yes | ☒ **No** - Have there been landslides along the banks or slopes?

Importance:

ADDITIONAL COMMENTS: **Aucune réaction ne s'est manifestée dans la commune, à notre connaissance, en ce qui concerne les tremblements de terre des 21 et 22 octobre. Un des employés a enregistré une forte secousse, peu de temps après s'être mis au lit, vers 22H00. Cela s'est présenté comme un gros choc(porte claquant fort), tout a fait anormal, qui l'a fortement intrigué, avec tremblement de tous les objets se trouvant dans la chambre. Il avait attribué ce tremblement à un tassement minier, comme il s'en produit fréquemment dans nos communes boraines.**

## Official inquiry for CIPLY (BE)

Location: 50.42°N 3.945°E, at 4.7 km from the epicentre.

**Imin: 3 - Imax: 3**

### Did some residents perceive

- ☒ **Yes** | ☐ **No** - Light vibrations?  
☐ **Yes** | ☒ **No** - A characteristic noise: rumbling or rolling?

### Did many residents perceive

- ☐ **Yes** | ☒ **No** - A clear shaking of the building?  
☐ **Yes** | ☒ **No** - A loud rumble?

### Have we witnessed

- ☒ **Yes** | ☐ **No** - The oscillation of chandeliers or freely suspended objects?  
☐ **Yes** | ☒ **No** - Swinging chairs or beds?  
☐ **Yes** | ☒ **No** - Cracking ceilings?  
☐ **Yes** | ☒ **No** - Sleepers waking up?

### Has it been witnessed or later observed

- ☐ **Yes** | ☒ **No** - The shivering of windows and doors?  
☐ **Yes** | ☒ **No** - The shaking of movable objects (tables, vases, knick-knacks, ...)?

### Has it been witnessed or later observed

- ☐ **Yes** | ☒ **No** - The clattering of glasses and dishes in buffets?  
☐ **Yes** | ☒ **No** - The swaying of frames hanging on the wall?  
☐ **Yes** | ☒ **No** - The creaking of floors?  
☐ **Yes** | ☒ **No** - Small fragments of plaster falling from ceilings?  
☐ **Yes** | ☒ **No** - A confusion of the inhabitants (people leaving the house).

### Has it been observed

- ☐ **Yes** | ☒ **No** - Moving knick-knacks?  
☐ **Yes** | ☒ **No** - Moving light objects?  
 Which ones?:  
☐ **Yes** | ☒ **No** - The falling of frames hanging on the wall?  
☐ **Yes** | ☒ **No** - The falling of light objects placed on polished furniture or marble  
☐ **Yes** | ☒ **No** - Cracked or broken windows?  
☐ **Yes** | ☒ **No** - Broken crockery?  
☐ **Yes** | ☒ **No** - Light objects (vases, flower pots, etc.) spilled?  
☐ **Yes** | ☒ **No** - Has light furniture moved?  
☐ **Yes** | ☒ **No** - Has heavy furniture (chests, stoves, ...) vibrated?  
☐ **Yes** | ☒ **No** - Did bells tinkle?  
☐ **Yes** | ☒ **No** - Did heavy furniture move?  
☐ **Yes** | ☒ **No** - Did light furniture tip over?  
☐ **Yes** | ☒ **No** - Have doors been moved on their hinges?

### Has it been observed

- ☐ **Yes** | ☒ **No** - Falling pieces of plaster from the ceilings?  
☐ **Yes** | ☒ **No** - Cracks in wall plaster?  
☐ **Yes** | ☒ **No** - An exceptional fall of a chimney in poor condition?  
☐ **Yes** | ☒ **No** - An exceptional fall of some bricks?  
☐ **Yes** | ☒ **No** - Have there been several damaged chimneys?

How many?:

- ☐ **Yes** | ☒ **No** - Have there been several chimneys overturned?

How many?:

% for the municipality?:

- ☐ **Yes** | ☒ **No** - Have there been any falls of façade ornaments?

How important?:

- ☐ **Yes** | ☒ **No** - Have there been deep cracks in the brick walls?  
☐ **Yes** | ☒ **No** - Have there been deep cracks in the concrete walls?  
☐ **Yes** | ☒ **No** - Have there been landslides along the banks or slopes?

Importance:

ADDITIONAL COMMENTS:

## Official inquiry for CUESMES (BE)

Location: 50.438°N 3.92°E, at 3.0 km from the epicentre.

**Imin: 4 - Imax: 4**

### Did some residents perceive

- ☐ Yes | ☒ **No** - Light vibrations?  
☐ Yes | ☒ **No** - A characteristic noise: rumbling or rolling?

### Did many residents perceive

- ☐ Yes | ☒ **No** - A clear shaking of the building?  
☒ **Yes** | ☐ No - A loud rumble?

### Have we witnessed

- ☐ Yes | ☒ **No** - The oscillation of chandeliers or freely suspended objects?  
☐ Yes | ☒ **No** - Swinging chairs or beds?  
☐ Yes | ☒ **No** - Cracking ceilings?  
☐ Yes | ☒ **No** - Sleepers waking up?

### Has it been witnessed or later observed

- ☒ **Yes** | ☐ No - The shivering of windows and doors?  
☐ Yes | ☒ **No** - The shaking of movable objects (tables, vases, knick-knacks, ...)?

### Has it been witnessed or later observed

- ☐ Yes | ☒ **No** - The clattering of glasses and dishes in buffets?  
☐ Yes | ☒ **No** - The swaying of frames hanging on the wall?  
☐ Yes | ☒ **No** - The creaking of floors?  
☐ Yes | ☒ **No** - Small fragments of plaster falling from ceilings?  
☐ Yes | ☒ **No** - A confusion of the inhabitants (people leaving the house).

### Has it been observed

- ☐ Yes | ☒ **No** - Moving knick-knacks?  
☐ Yes | ☒ **No** - Moving light objects?

Which ones?:

- ☐ Yes | ☒ **No** - The falling of frames hanging on the wall?  
☐ Yes | ☒ **No** - The falling of light objects placed on polished furniture or marble  
☐ Yes | ☒ **No** - Cracked or broken windows?  
☐ Yes | ☒ **No** - Broken crockery?  
☐ Yes | ☒ **No** - Light objects (vases, flower pots, etc.) spilled?  
☐ Yes | ☒ **No** - Has light furniture moved?  
☐ Yes | ☒ **No** - Has heavy furniture (chests, stoves, ...) vibrated?  
☐ Yes | ☒ **No** - Did bells tinkle?  
☐ Yes | ☒ **No** - Did heavy furniture move?  
☐ Yes | ☒ **No** - Did light furniture tip over?  
☐ Yes | ☒ **No** - Have doors been moved on their hinges?

### Has it been observed

- ☐ Yes | ☒ **No** - Falling pieces of plaster from the ceilings?  
☐ Yes | ☒ **No** - Cracks in wall plaster?  
☐ Yes | ☒ **No** - An exceptional fall of a chimney in poor condition?  
☐ Yes | ☒ **No** - An exceptional fall of some bricks?  
☐ Yes | ☒ **No** - Have there been several damaged chimneys?

How many?:

- ☐ Yes | ☒ **No** - Have there been several chimneys overturned?

How many?:

% for the municipality?:

- ☐ Yes | ☒ **No** - Have there been any falls of façade ornaments?

How important?:

- ☐ Yes | ☒ **No** - Have there been deep cracks in the brick walls?  
☐ Yes | ☒ **No** - Have there been deep cracks in the concrete walls?  
☐ Yes | ☒ **No** - Have there been landslides along the banks or slopes?

Importance:

ADDITIONAL COMMENTS: **les nombreux habitants qui ressentirent la vibrations entendirent également une forte déflagration.**

## Official inquiry for ERBISOEUL (BE)

Location: 50.515°N 3.898°E, at 10.4 km from the epicentre.

**Imin: 3 - Imax: 3**

### Did some residents perceive

- ☒ **Yes** | ☐ No - Light vibrations?  
☐ Yes | ☒ **No** - A characteristic noise: rumbling or rolling?

### Did many residents perceive

- ☐ Yes | ☒ **No** - A clear shaking of the building?  
☐ Yes | ☒ **No** - A loud rumble?

### Have we witnessed

- ☐ Yes | ☒ **No** - The oscillation of chandeliers or freely suspended objects?  
☐ Yes | ☒ **No** - Swinging chairs or beds?  
☐ Yes | ☒ **No** - Cracking ceilings?  
☐ Yes | ☒ **No** - Sleepers waking up?

### Has it been witnessed or later observed

- ☒ **Yes** | ☐ No - The shivering of windows and doors?  
☐ Yes | ☒ **No** - The shaking of movable objects (tables, vases, knick-knacks, ...)?

### Has it been witnessed or later observed

- ☒ **Yes** | ☐ No - The clattering of glasses and dishes in buffets?  
☐ Yes | ☒ **No** - The swaying of frames hanging on the wall?  
☐ Yes | ☒ **No** - The creaking of floors?  
☐ Yes | ☒ **No** - Small fragments of plaster falling from ceilings?  
☐ Yes | ☒ **No** - A confusion of the inhabitants (people leaving the house).

### Has it been observed

- ☐ Yes | ☒ **No** - Moving knick-knacks?  
☐ Yes | ☒ **No** - Moving light objects?  
 Which ones?:  
☐ Yes | ☒ **No** - The falling of frames hanging on the wall?  
☐ Yes | ☒ **No** - The falling of light objects placed on polished furniture or marble  
☐ Yes | ☒ **No** - Cracked or broken windows?  
☐ Yes | ☒ **No** - Broken crockery?  
☐ Yes | ☒ **No** - Light objects (vases, flower pots, etc.) spilled?  
☐ Yes | ☒ **No** - Has light furniture moved?  
☐ Yes | ☒ **No** - Has heavy furniture (chests, stoves, ...) vibrated?  
☐ Yes | ☒ **No** - Did bells tinkle?  
☐ Yes | ☒ **No** - Did heavy furniture move?  
☐ Yes | ☒ **No** - Did light furniture tip over?  
☐ Yes | ☒ **No** - Have doors been moved on their hinges?

### Has it been observed

- ☐ Yes | ☒ **No** - Falling pieces of plaster from the ceilings?  
☐ Yes | ☒ **No** - Cracks in wall plaster?  
☐ Yes | ☒ **No** - An exceptional fall of a chimney in poor condition?  
☐ Yes | ☒ **No** - An exceptional fall of some bricks?  
☐ Yes | ☒ **No** - Have there been several damaged chimneys?

How many?:

- ☐ Yes | ☒ **No** - Have there been several chimneys overturned?

How many?:

% for the municipality?:

- ☐ Yes | ☒ **No** - Have there been any falls of façade ornaments?

How important?:

- ☐ Yes | ☒ **No** - Have there been deep cracks in the brick walls?  
☐ Yes | ☒ **No** - Have there been deep cracks in the concrete walls?  
☐ Yes | ☒ **No** - Have there been landslides along the banks or slopes?

Importance:

ADDITIONAL COMMENTS:

## Official inquiry for FLENU (BE)

Location: 50.449°N 3.888°E, at 2.2 km from the epicentre.

**Imin: 3 - Imax: 3**

### Did some residents perceive

- ☒ **Yes** | ☐ No - Light vibrations?  
☒ **Yes** | ☐ No - A characteristic noise: rumbling or rolling?

### Did many residents perceive

- ☐ Yes | ☒ **No** - A clear shaking of the building?  
☐ Yes | ☒ **No** - A loud rumble?

### Have we witnessed

- ☐ Yes | ☒ **No** - The oscillation of chandeliers or freely suspended objects?  
☐ Yes | ☒ **No** - Swinging chairs or beds?  
☐ Yes | ☒ **No** - Cracking ceilings?  
☐ Yes | ☒ **No** - Sleepers waking up?

### Has it been witnessed or later observed

- ☒ **Yes** | ☐ No - The shivering of windows and doors?  
☒ **Yes** | ☐ No - The shaking of movable objects (tables, vases, knick-knacks, ...)?

### Has it been witnessed or later observed

- ☐ Yes | ☒ **No** - The clattering of glasses and dishes in buffets?  
☐ Yes | ☒ **No** - The swaying of frames hanging on the wall?  
☐ Yes | ☒ **No** - The creaking of floors?  
☐ Yes | ☒ **No** - Small fragments of plaster falling from ceilings?  
☐ Yes | ☒ **No** - A confusion of the inhabitants (people leaving the house).

### Has it been observed

- ☐ Yes | ☒ **No** - Moving knick-knacks?  
☐ Yes | ☒ **No** - Moving light objects?  
 Which ones?:  
☐ Yes | ☒ **No** - The falling of frames hanging on the wall?  
☐ Yes | ☒ **No** - The falling of light objects placed on polished furniture or marble  
☐ Yes | ☒ **No** - Cracked or broken windows?  
☐ Yes | ☒ **No** - Broken crockery?  
☐ Yes | ☒ **No** - Light objects (vases, flower pots, etc.) spilled?  
☐ Yes | ☒ **No** - Has light furniture moved?  
☐ Yes | ☒ **No** - Has heavy furniture (chests, stoves, ...) vibrated?  
☐ Yes | ☒ **No** - Did bells tinkle?  
☐ Yes | ☒ **No** - Did heavy furniture move?  
☐ Yes | ☒ **No** - Did light furniture tip over?  
☐ Yes | ☒ **No** - Have doors been moved on their hinges?

### Has it been observed

- ☐ Yes | ☒ **No** - Falling pieces of plaster from the ceilings?  
☐ Yes | ☒ **No** - Cracks in wall plaster?  
☐ Yes | ☒ **No** - An exceptional fall of a chimney in poor condition?  
☐ Yes | ☒ **No** - An exceptional fall of some bricks?  
☐ Yes | ☒ **No** - Have there been several damaged chimneys?

How many?:

- ☐ Yes | ☒ **No** - Have there been several chimneys overturned?

How many?:

% for the municipality?:

- ☐ Yes | ☒ **No** - Have there been any falls of façade ornaments?

How important?:

- ☐ Yes | ☒ **No** - Have there been deep cracks in the brick walls?  
☐ Yes | ☒ **No** - Have there been deep cracks in the concrete walls?  
☐ Yes | ☒ **No** - Have there been landslides along the banks or slopes?

Importance:

ADDITIONAL COMMENTS:

## Official inquiry for FRAMERIES (BE)

Location: 50.411°N 3.894°E, at 2.4 km from the epicentre.

**Imin: 3 - Imax: 4**

### Did some residents perceive

- ☒ **Yes** | ☐ No - Light vibrations?  
☒ **Yes** | ☐ No - A characteristic noise: rumbling or rolling?

### Did many residents perceive

- ☐ Yes | ☒ **No** - A clear shaking of the building?  
☐ Yes | ☒ **No** - A loud rumble?

### Have we witnessed

- ☒ **Yes** | ☐ No - The oscillation of chandeliers or freely suspended objects?  
☒ **Yes** | ☐ No - Swinging chairs or beds?  
☒ **Yes** | ☐ No - Cracking ceilings?  
☒ **Yes** | ☐ No - Sleepers waking up?

### Has it been witnessed or later observed

- ☒ **Yes** | ☐ No - The shivering of windows and doors?  
☒ **Yes** | ☐ No - The shaking of movable objects (tables, vases, knick-knacks, ...)?

### Has it been witnessed or later observed

- ☐ Yes | ☒ **No** - The clattering of glasses and dishes in buffets?  
☐ Yes | ☒ **No** - The swaying of frames hanging on the wall?  
☐ Yes | ☒ **No** - The creaking of floors?  
☐ Yes | ☒ **No** - Small fragments of plaster falling from ceilings?  
☐ Yes | ☒ **No** - A confusion of the inhabitants (people leaving the house).

### Has it been observed

- ☐ Yes | ☒ **No** - Moving knick-knacks?  
☐ Yes | ☒ **No** - Moving light objects?  
 Which ones?:  
☐ Yes | ☒ **No** - The falling of frames hanging on the wall?  
☐ Yes | ☒ **No** - The falling of light objects placed on polished furniture or marble  
☐ Yes | ☒ **No** - Cracked or broken windows?  
☐ Yes | ☒ **No** - Broken crockery?  
☐ Yes | ☒ **No** - Light objects (vases, flower pots, etc.) spilled?  
☐ Yes | ☒ **No** - Has light furniture moved?  
☐ Yes | ☒ **No** - Has heavy furniture (chests, stoves, ...) vibrated?  
☐ Yes | ☒ **No** - Did bells tinkle?  
☐ Yes | ☒ **No** - Did heavy furniture move?  
☐ Yes | ☒ **No** - Did light furniture tip over?  
☐ Yes | ☒ **No** - Have doors been moved on their hinges?

### Has it been observed

- ☐ Yes | ☒ **No** - Falling pieces of plaster from the ceilings?  
☐ Yes | ☒ **No** - Cracks in wall plaster?  
☐ Yes | ☒ **No** - An exceptional fall of a chimney in poor condition?  
☐ Yes | ☒ **No** - An exceptional fall of some bricks?  
☐ Yes | ☒ **No** - Have there been several damaged chimneys?

How many?:

- ☐ Yes | ☒ **No** - Have there been several chimneys overturned?

How many?:

% for the municipality?:

- ☐ Yes | ☒ **No** - Have there been any falls of façade ornaments?

How important?:

- ☐ Yes | ☒ **No** - Have there been deep cracks in the brick walls?  
☐ Yes | ☒ **No** - Have there been deep cracks in the concrete walls?  
☐ Yes | ☒ **No** - Have there been landslides along the banks or slopes?

Importance:

ADDITIONAL COMMENTS:

## Official inquiry for GENLY (BE)

Location: 50.393°N 3.919°E, at 5.0 km from the epicentre.

**Imin: 3 - Imax: 3**

### Did some residents perceive

- ☒ **Yes** | ☐ No - Light vibrations?  
☒ **Yes** | ☐ No - A characteristic noise: rumbling or rolling?

### Did many residents perceive

- ☒ **Yes** | ☐ No - A clear shaking of the building?  
☐ Yes | ☒ **No** - A loud rumble?

### Have we witnessed

- ☒ **Yes** | ☐ No - The oscillation of chandeliers or freely suspended objects?  
☐ Yes | ☒ **No** - Swinging chairs or beds?  
☐ Yes | ☒ **No** - Cracking ceilings?  
☐ Yes | ☒ **No** - Sleepers waking up?

### Has it been witnessed or later observed

- ☒ **Yes** | ☐ No - The shivering of windows and doors?  
☐ Yes | ☒ **No** - The shaking of movable objects (tables, vases, knick-knacks, ...)?

### Has it been witnessed or later observed

- ☐ Yes | ☒ **No** - The clattering of glasses and dishes in buffets?  
☐ Yes | ☒ **No** - The swaying of frames hanging on the wall?  
☐ Yes | ☒ **No** - The creaking of floors?  
☐ Yes | ☒ **No** - Small fragments of plaster falling from ceilings?  
☐ Yes | ☒ **No** - A confusion of the inhabitants (people leaving the house).

### Has it been observed

- ☐ Yes | ☒ **No** - Moving knick-knacks?  
☐ Yes | ☒ **No** - Moving light objects?  
 Which ones?:  
☐ Yes | ☒ **No** - The falling of frames hanging on the wall?  
☐ Yes | ☒ **No** - The falling of light objects placed on polished furniture or marble  
☐ Yes | ☒ **No** - Cracked or broken windows?  
☐ Yes | ☒ **No** - Broken crockery?  
☐ Yes | ☒ **No** - Light objects (vases, flower pots, etc.) spilled?  
☐ Yes | ☒ **No** - Has light furniture moved?  
☐ Yes | ☒ **No** - Has heavy furniture (chests, stoves, ...) vibrated?  
☐ Yes | ☒ **No** - Did bells tinkle?  
☐ Yes | ☒ **No** - Did heavy furniture move?  
☐ Yes | ☒ **No** - Did light furniture tip over?  
☐ Yes | ☒ **No** - Have doors been moved on their hinges?

### Has it been observed

- ☐ Yes | ☒ **No** - Falling pieces of plaster from the ceilings?  
☐ Yes | ☒ **No** - Cracks in wall plaster?  
☐ Yes | ☒ **No** - An exceptional fall of a chimney in poor condition?  
☐ Yes | ☒ **No** - An exceptional fall of some bricks?  
☐ Yes | ☒ **No** - Have there been several damaged chimneys?

How many?:

- ☐ Yes | ☒ **No** - Have there been several chimneys overturned?

How many?:

% for the municipality?:

- ☐ Yes | ☒ **No** - Have there been any falls of façade ornaments?

How important?:

- ☐ Yes | ☒ **No** - Have there been deep cracks in the brick walls?  
☐ Yes | ☒ **No** - Have there been deep cracks in the concrete walls?  
☐ Yes | ☒ **No** - Have there been landslides along the banks or slopes?

Importance:

ADDITIONAL COMMENTS:

## Official inquiry for HORNU (BE)

Location: 50.434°N 3.829°E, at 3.6 km from the epicentre.

**Imin: 3 - Imax: 3**

### Did some residents perceive

- ☒ **Yes** | ☐ No - Light vibrations?  
☒ **Yes** | ☐ No - A characteristic noise: rumbling or rolling?

### Did many residents perceive

- ☐ Yes | ☒ **No** - A clear shaking of the building?  
☐ Yes | ☒ **No** - A loud rumble?

### Have we witnessed

- ☐ Yes | ☒ **No** - The oscillation of chandeliers or freely suspended objects?  
☒ **Yes** | ☐ No - Swinging chairs or beds?  
☐ Yes | ☒ **No** - Cracking ceilings?  
☐ Yes | ☒ **No** - Sleepers waking up?

### Has it been witnessed or later observed

- ☐ Yes | ☒ **No** - The shivering of windows and doors?  
☐ Yes | ☒ **No** - The shaking of movable objects (tables, vases, knick-knacks, ...)?

### Has it been witnessed or later observed

- ☐ Yes | ☒ **No** - The clattering of glasses and dishes in buffets?  
☐ Yes | ☒ **No** - The swaying of frames hanging on the wall?  
☐ Yes | ☒ **No** - The creaking of floors?  
☐ Yes | ☒ **No** - Small fragments of plaster falling from ceilings?  
☐ Yes | ☒ **No** - A confusion of the inhabitants (people leaving the house).

### Has it been observed

- ☐ Yes | ☒ **No** - Moving knick-knacks?  
☐ Yes | ☒ **No** - Moving light objects?  
 Which ones?:  
☐ Yes | ☒ **No** - The falling of frames hanging on the wall?  
☐ Yes | ☒ **No** - The falling of light objects placed on polished furniture or marble  
☐ Yes | ☒ **No** - Cracked or broken windows?  
☐ Yes | ☒ **No** - Broken crockery?  
☐ Yes | ☒ **No** - Light objects (vases, flower pots, etc.) spilled?  
☐ Yes | ☒ **No** - Has light furniture moved?  
☐ Yes | ☒ **No** - Has heavy furniture (chests, stoves, ...) vibrated?  
☐ Yes | ☒ **No** - Did bells tinkle?  
☐ Yes | ☒ **No** - Did heavy furniture move?  
☐ Yes | ☒ **No** - Did light furniture tip over?  
☐ Yes | ☒ **No** - Have doors been moved on their hinges?

### Has it been observed

- ☐ Yes | ☒ **No** - Falling pieces of plaster from the ceilings?  
☐ Yes | ☒ **No** - Cracks in wall plaster?  
☐ Yes | ☒ **No** - An exceptional fall of a chimney in poor condition?  
☐ Yes | ☒ **No** - An exceptional fall of some bricks?  
☐ Yes | ☒ **No** - Have there been several damaged chimneys?

How many?:

- ☐ Yes | ☒ **No** - Have there been several chimneys overturned?

How many?:

% for the municipality?:

- ☐ Yes | ☒ **No** - Have there been any falls of façade ornaments?

How important?:

- ☐ Yes | ☒ **No** - Have there been deep cracks in the brick walls?  
☐ Yes | ☒ **No** - Have there been deep cracks in the concrete walls?  
☐ Yes | ☒ **No** - Have there been landslides along the banks or slopes?

Importance:

ADDITIONAL COMMENTS:

## Official inquiry for HYON (BE)

Location: 50.441°N 3.966°E, at 6.3 km from the epicentre.

**Imin: 3 - Imax: 3**

### Did some residents perceive

- ☒ **Yes** | ☐ No - Light vibrations?  
☐ Yes | ☒ **No** - A characteristic noise: rumbling or rolling?

### Did many residents perceive

- ☐ Yes | ☒ **No** - A clear shaking of the building?  
☐ Yes | ☒ **No** - A loud rumble?

### Have we witnessed

- ☐ Yes | ☒ **No** - The oscillation of chandeliers or freely suspended objects?  
☒ **Yes** | ☐ No - Swinging chairs or beds?  
☐ Yes | ☒ **No** - Cracking ceilings?  
☐ Yes | ☒ **No** - Sleepers waking up?

### Has it been witnessed or later observed

- ☐ Yes | ☒ **No** - The shivering of windows and doors?  
☐ Yes | ☒ **No** - The shaking of movable objects (tables, vases, knick-knacks, ...)?

### Has it been witnessed or later observed

- ☐ Yes | ☒ **No** - The clattering of glasses and dishes in buffets?  
☐ Yes | ☒ **No** - The swaying of frames hanging on the wall?  
☐ Yes | ☒ **No** - The creaking of floors?  
☐ Yes | ☒ **No** - Small fragments of plaster falling from ceilings?  
☐ Yes | ☒ **No** - A confusion of the inhabitants (people leaving the house).

### Has it been observed

- ☐ Yes | ☒ **No** - Moving knick-knacks?  
☐ Yes | ☒ **No** - Moving light objects?  
 Which ones?:  
☐ Yes | ☒ **No** - The falling of frames hanging on the wall?  
☐ Yes | ☒ **No** - The falling of light objects placed on polished furniture or marble  
☐ Yes | ☒ **No** - Cracked or broken windows?  
☐ Yes | ☒ **No** - Broken crockery?  
☐ Yes | ☒ **No** - Light objects (vases, flower pots, etc.) spilled?  
☐ Yes | ☒ **No** - Has light furniture moved?  
☐ Yes | ☒ **No** - Has heavy furniture (chests, stoves, ...) vibrated?  
☐ Yes | ☒ **No** - Did bells tinkle?  
☐ Yes | ☒ **No** - Did heavy furniture move?  
☐ Yes | ☒ **No** - Did light furniture tip over?  
☐ Yes | ☒ **No** - Have doors been moved on their hinges?

### Has it been observed

- ☐ Yes | ☒ **No** - Falling pieces of plaster from the ceilings?  
☐ Yes | ☒ **No** - Cracks in wall plaster?  
☐ Yes | ☒ **No** - An exceptional fall of a chimney in poor condition?  
☐ Yes | ☒ **No** - An exceptional fall of some bricks?  
☐ Yes | ☒ **No** - Have there been several damaged chimneys?

How many?:

- ☐ Yes | ☒ **No** - Have there been several chimneys overturned?

How many?:

% for the municipality?:

- ☐ Yes | ☒ **No** - Have there been any falls of façade ornaments?

How important?:

- ☐ Yes | ☒ **No** - Have there been deep cracks in the brick walls?  
☐ Yes | ☒ **No** - Have there been deep cracks in the concrete walls?  
☐ Yes | ☒ **No** - Have there been landslides along the banks or slopes?

Importance:

ADDITIONAL COMMENTS:

## Official inquiry for JEMAPPES (BE)

Location: 50.449°N 3.888°E, at 2.2 km from the epicentre.

**Imin: 4 - Imax: 4**

### Did some residents perceive

- ☒ **Yes** | ☐ No - Light vibrations?  
☒ **Yes** | ☐ No - A characteristic noise: rumbling or rolling?

### Did many residents perceive

- ☒ **Yes** | ☐ No - A clear shaking of the building?  
☐ Yes | ☒ **No** - A loud rumble?

### Have we witnessed

- ☐ Yes | ☒ **No** - The oscillation of chandeliers or freely suspended objects?  
☐ Yes | ☒ **No** - Swinging chairs or beds?  
☐ Yes | ☒ **No** - Cracking ceilings?  
☒ **Yes** | ☐ No - Sleepers waking up?

### Has it been witnessed or later observed

- ☒ **Yes** | ☐ No - The shivering of windows and doors?  
☐ Yes | ☒ **No** - The shaking of movable objects (tables, vases, knick-knacks, ...)?

### Has it been witnessed or later observed

- ☐ Yes | ☒ **No** - The clattering of glasses and dishes in buffets?  
☐ Yes | ☒ **No** - The swaying of frames hanging on the wall?  
☐ Yes | ☒ **No** - The creaking of floors?  
☐ Yes | ☒ **No** - Small fragments of plaster falling from ceilings?  
☐ Yes | ☒ **No** - A confusion of the inhabitants (people leaving the house).

### Has it been observed

- ☐ Yes | ☒ **No** - Moving knick-knacks?  
☐ Yes | ☒ **No** - Moving light objects?  
 Which ones?:  
☐ Yes | ☒ **No** - The falling of frames hanging on the wall?  
☐ Yes | ☒ **No** - The falling of light objects placed on polished furniture or marble  
☐ Yes | ☒ **No** - Cracked or broken windows?  
☐ Yes | ☒ **No** - Broken crockery?  
☐ Yes | ☒ **No** - Light objects (vases, flower pots, etc.) spilled?  
☐ Yes | ☒ **No** - Has light furniture moved?  
☐ Yes | ☒ **No** - Has heavy furniture (chests, stoves, ...) vibrated?  
☐ Yes | ☒ **No** - Did bells tinkle?  
☐ Yes | ☒ **No** - Did heavy furniture move?  
☐ Yes | ☒ **No** - Did light furniture tip over?  
☐ Yes | ☒ **No** - Have doors been moved on their hinges?

### Has it been observed

- ☐ Yes | ☒ **No** - Falling pieces of plaster from the ceilings?  
☐ Yes | ☒ **No** - Cracks in wall plaster?  
☐ Yes | ☒ **No** - An exceptional fall of a chimney in poor condition?  
☐ Yes | ☒ **No** - An exceptional fall of some bricks?  
☐ Yes | ☒ **No** - Have there been several damaged chimneys?

How many?:

- ☐ Yes | ☒ **No** - Have there been several chimneys overturned?

How many?:

% for the municipality?:

- ☐ Yes | ☒ **No** - Have there been any falls of façade ornaments?

How important?:

- ☐ Yes | ☒ **No** - Have there been deep cracks in the brick walls?  
☐ Yes | ☒ **No** - Have there been deep cracks in the concrete walls?  
☐ Yes | ☒ **No** - Have there been landslides along the banks or slopes?

Importance:

ADDITIONAL COMMENTS:

## Official inquiry for LA BOUVERIE (BE)

Location: 50.405°N 3.876°E, at 2.8 km from the epicentre.

**Imin: 3 - Imax: 3**

### Did some residents perceive

☒ **Yes** | ☐ No - Light vibrations?

☒ **Yes** | ☐ No - A characteristic noise: rumbling or rolling?

### Did many residents perceive

☐ Yes | ☒ **No** - A clear shaking of the building?

☐ Yes | ☒ **No** - A loud rumble?

### Have we witnessed

☐ Yes | ☒ **No** - The oscillation of chandeliers or freely suspended objects?

☒ **Yes** | ☐ No - Swinging chairs or beds?

☐ Yes | ☒ **No** - Cracking ceilings?

☒ **Yes** | ☐ No - Sleepers waking up?

### Has it been witnessed or later observed

☒ **Yes** | ☐ No - The shivering of windows and doors?

☐ Yes | ☒ **No** - The shaking of movable objects (tables, vases, knick-knacks, ...)?

### Has it been witnessed or later observed

☐ Yes | ☒ **No** - The clattering of glasses and dishes in buffets?

☐ Yes | ☒ **No** - The swaying of frames hanging on the wall?

☐ Yes | ☒ **No** - The creaking of floors?

☐ Yes | ☒ **No** - Small fragments of plaster falling from ceilings?

☒ **Yes** | ☐ No - A confusion of the inhabitants (people leaving the house).

### Has it been observed

☐ Yes | ☒ **No** - Moving knick-knacks?

☐ Yes | ☒ **No** - Moving light objects?

Which ones?:

☐ Yes | ☒ **No** - The falling of frames hanging on the wall?

☐ Yes | ☒ **No** - The falling of light objects placed on polished furniture or marble

☐ Yes | ☒ **No** - Cracked or broken windows?

☐ Yes | ☒ **No** - Broken crockery?

☐ Yes | ☒ **No** - Light objects (vases, flower pots, etc.) spilled?

☐ Yes | ☒ **No** - Has light furniture moved?

☐ Yes | ☒ **No** - Has heavy furniture (chests, stoves, ...) vibrated?

☐ Yes | ☒ **No** - Did bells tinkle?

☐ Yes | ☒ **No** - Did heavy furniture move?

☐ Yes | ☒ **No** - Did light furniture tip over?

☐ Yes | ☒ **No** - Have doors been moved on their hinges?

### Has it been observed

☐ Yes | ☒ **No** - Falling pieces of plaster from the ceilings?

☐ Yes | ☒ **No** - Cracks in wall plaster?

☐ Yes | ☒ **No** - An exceptional fall of a chimney in poor condition?

☐ Yes | ☒ **No** - An exceptional fall of some bricks?

☐ Yes | ☒ **No** - Have there been several damaged chimneys?

How many?:

☐ Yes | ☒ **No** - Have there been several chimneys overturned?

How many?:

% for the municipality?:

☐ Yes | ☒ **No** - Have there been any falls of façade ornaments?

How important?:

☐ Yes | ☒ **No** - Have there been deep cracks in the brick walls?

☐ Yes | ☒ **No** - Have there been deep cracks in the concrete walls?

☐ Yes | ☒ **No** - Have there been landslides along the banks or slopes?

Importance:

ADDITIONAL COMMENTS:

## Official inquiry for LENS (BE)

Location: 50.557°N 3.902°E, at 14.2 km from the epicentre.

**Imin: 3 - Imax: 3**

### Did some residents perceive

- ☐ Yes | ☒ **No** - Light vibrations?  
☒ **Yes** | ☐ No - A characteristic noise: rumbling or rolling?

### Did many residents perceive

- ☐ Yes | ☒ **No** - A clear shaking of the building?  
☐ Yes | ☒ **No** - A loud rumble?

### Have we witnessed

- ☐ Yes | ☒ **No** - The oscillation of chandeliers or freely suspended objects?  
☐ Yes | ☒ **No** - Swinging chairs or beds?  
☐ Yes | ☒ **No** - Cracking ceilings?  
☒ **Yes** | ☐ No - Sleepers waking up?

### Has it been witnessed or later observed

- ☒ **Yes** | ☐ No - The shivering of windows and doors?  
☐ Yes | ☒ **No** - The shaking of movable objects (tables, vases, knick-knacks, ...)?

### Has it been witnessed or later observed

- ☐ Yes | ☒ **No** - The clattering of glasses and dishes in buffets?  
☐ Yes | ☒ **No** - The swaying of frames hanging on the wall?  
☐ Yes | ☒ **No** - The creaking of floors?  
☐ Yes | ☒ **No** - Small fragments of plaster falling from ceilings?  
☒ **Yes** | ☐ No - A confusion of the inhabitants (people leaving the house).

### Has it been observed

- ☐ Yes | ☒ **No** - Moving knick-knacks?  
☐ Yes | ☒ **No** - Moving light objects?  
 Which ones?:  
☐ Yes | ☒ **No** - The falling of frames hanging on the wall?  
☐ Yes | ☒ **No** - The falling of light objects placed on polished furniture or marble  
☐ Yes | ☒ **No** - Cracked or broken windows?  
☐ Yes | ☒ **No** - Broken crockery?  
☐ Yes | ☒ **No** - Light objects (vases, flower pots, etc.) spilled?  
☐ Yes | ☒ **No** - Has light furniture moved?  
☐ Yes | ☒ **No** - Has heavy furniture (chests, stoves, ...) vibrated?  
☐ Yes | ☒ **No** - Did bells tinkle?  
☐ Yes | ☒ **No** - Did heavy furniture move?  
☐ Yes | ☒ **No** - Did light furniture tip over?  
☐ Yes | ☒ **No** - Have doors been moved on their hinges?

### Has it been observed

- ☐ Yes | ☒ **No** - Falling pieces of plaster from the ceilings?  
☐ Yes | ☒ **No** - Cracks in wall plaster?  
☐ Yes | ☒ **No** - An exceptional fall of a chimney in poor condition?  
☐ Yes | ☒ **No** - An exceptional fall of some bricks?  
☐ Yes | ☒ **No** - Have there been several damaged chimneys?

How many?:

- ☐ Yes | ☒ **No** - Have there been several chimneys overturned?

How many?:

% for the municipality?:

- ☐ Yes | ☒ **No** - Have there been any falls of façade ornaments?

How important?:

- ☐ Yes | ☒ **No** - Have there been deep cracks in the brick walls?  
☐ Yes | ☒ **No** - Have there been deep cracks in the concrete walls?  
☐ Yes | ☒ **No** - Have there been landslides along the banks or slopes?

Importance:

ADDITIONAL COMMENTS:

## Official inquiry for MESVIN (BE)

Location: 50.427°N 3.961°E, at 5.8 km from the epicentre.

**Imin: 3 - Imax: 3**

### Did some residents perceive

☒ **Yes** | ☐ No - Light vibrations?

☒ **Yes** | ☐ No - A characteristic noise: rumbling or rolling?

### Did many residents perceive

☐ Yes | ☒ **No** - A clear shaking of the building?

☐ Yes | ☒ **No** - A loud rumble?

### Have we witnessed

☐ Yes | ☒ **No** - The oscillation of chandeliers or freely suspended objects?

☒ **Yes** | ☐ No - Swinging chairs or beds?

☐ Yes | ☒ **No** - Cracking ceilings?

☐ Yes | ☒ **No** - Sleepers waking up?

### Has it been witnessed or later observed

☒ **Yes** | ☐ No - The shivering of windows and doors?

☒ **Yes** | ☐ No - The shaking of movable objects (tables, vases, knick-knacks, ...)?

### Has it been witnessed or later observed

☐ Yes | ☒ **No** - The clattering of glasses and dishes in buffets?

☐ Yes | ☒ **No** - The swaying of frames hanging on the wall?

☐ Yes | ☒ **No** - The creaking of floors?

☐ Yes | ☒ **No** - Small fragments of plaster falling from ceilings?

☐ Yes | ☒ **No** - A confusion of the inhabitants (people leaving the house).

### Has it been observed

☐ Yes | ☒ **No** - Moving knick-knacks?

☐ Yes | ☒ **No** - Moving light objects?

Which ones?:

☐ Yes | ☒ **No** - The falling of frames hanging on the wall?

☐ Yes | ☒ **No** - The falling of light objects placed on polished furniture or marble

☐ Yes | ☒ **No** - Cracked or broken windows?

☐ Yes | ☒ **No** - Broken crockery?

☐ Yes | ☒ **No** - Light objects (vases, flower pots, etc.) spilled?

☐ Yes | ☒ **No** - Has light furniture moved?

☐ Yes | ☒ **No** - Has heavy furniture (chests, stoves, ...) vibrated?

☐ Yes | ☒ **No** - Did bells tinkle?

☐ Yes | ☒ **No** - Did heavy furniture move?

☐ Yes | ☒ **No** - Did light furniture tip over?

☐ Yes | ☒ **No** - Have doors been moved on their hinges?

### Has it been observed

☐ Yes | ☒ **No** - Falling pieces of plaster from the ceilings?

☐ Yes | ☒ **No** - Cracks in wall plaster?

☐ Yes | ☒ **No** - An exceptional fall of a chimney in poor condition?

☐ Yes | ☒ **No** - An exceptional fall of some bricks?

☐ Yes | ☒ **No** - Have there been several damaged chimneys?

How many?:

☐ Yes | ☒ **No** - Have there been several chimneys overturned?

How many?:

% for the municipality?:

☐ Yes | ☒ **No** - Have there been any falls of façade ornaments?

How important?:

☐ Yes | ☒ **No** - Have there been deep cracks in the brick walls?

☐ Yes | ☒ **No** - Have there been deep cracks in the concrete walls?

☐ Yes | ☒ **No** - Have there been landslides along the banks or slopes?

Importance:

ADDITIONAL COMMENTS:

## Official inquiry for MONS (BE)

Location: 50.455°N 3.948°E, at 5.6 km from the epicentre.

**Imin: 3 - Imax: 4**

### Did some residents perceive

- ☐ Yes | ☒ **No** - Light vibrations?  
☒ **Yes** | ☐ No - A characteristic noise: rumbling or rolling?

### Did many residents perceive

- ☒ **Yes** | ☐ No - A clear shaking of the building?  
☒ **Yes** | ☐ No - A loud rumble?

### Have we witnessed

- ☐ Yes | ☒ **No** - The oscillation of chandeliers or freely suspended objects?  
☐ Yes | ☒ **No** - Swinging chairs or beds?  
☐ Yes | ☒ **No** - Cracking ceilings?  
☒ **Yes** | ☐ No - Sleepers waking up?

### Has it been witnessed or later observed

- ☒ **Yes** | ☐ No - The shivering of windows and doors?  
☒ **Yes** | ☐ No - The shaking of movable objects (tables, vases, knick-knacks, ...)?

### Has it been witnessed or later observed

- ☒ **Yes** | ☐ No - The clattering of glasses and dishes in buffets?  
☐ Yes | ☒ **No** - The swaying of frames hanging on the wall?  
☐ Yes | ☒ **No** - The creaking of floors?  
☐ Yes | ☒ **No** - Small fragments of plaster falling from ceilings?  
☐ Yes | ☒ **No** - A confusion of the inhabitants (people leaving the house).

### Has it been observed

- ☐ Yes | ☒ **No** - Moving knick-knacks?  
☐ Yes | ☒ **No** - Moving light objects?  
 Which ones?:  
☐ Yes | ☒ **No** - The falling of frames hanging on the wall?  
☐ Yes | ☒ **No** - The falling of light objects placed on polished furniture or marble  
☐ Yes | ☒ **No** - Cracked or broken windows?  
☐ Yes | ☒ **No** - Broken crockery?  
☐ Yes | ☒ **No** - Light objects (vases, flower pots, etc.) spilled?  
☐ Yes | ☒ **No** - Has light furniture moved?  
☐ Yes | ☒ **No** - Has heavy furniture (chests, stoves, ...) vibrated?  
☐ Yes | ☒ **No** - Did bells tinkle?  
☐ Yes | ☒ **No** - Did heavy furniture move?  
☐ Yes | ☒ **No** - Did light furniture tip over?  
☐ Yes | ☒ **No** - Have doors been moved on their hinges?

### Has it been observed

- ☐ Yes | ☒ **No** - Falling pieces of plaster from the ceilings?  
☐ Yes | ☒ **No** - Cracks in wall plaster?  
☐ Yes | ☒ **No** - An exceptional fall of a chimney in poor condition?  
☐ Yes | ☒ **No** - An exceptional fall of some bricks?  
☐ Yes | ☒ **No** - Have there been several damaged chimneys?

How many?:

- ☐ Yes | ☒ **No** - Have there been several chimneys overturned?

How many?:

% for the municipality?:

- ☐ Yes | ☒ **No** - Have there been any falls of façade ornaments?

How important?:

- ☐ Yes | ☒ **No** - Have there been deep cracks in the brick walls?  
☐ Yes | ☒ **No** - Have there been deep cracks in the concrete walls?  
☐ Yes | ☒ **No** - Have there been landslides along the banks or slopes?

Importance:

ADDITIONAL COMMENTS:

## Official inquiry for NIMY (BE)

Location: 50.473°N 3.959°E, at 7.4 km from the epicentre.

**Imin: 2 - Imax: 2**

### Did some residents perceive

- ☐ Yes | ☒ **No** - Light vibrations?  
☒ **Yes** | ☐ No - A characteristic noise: rumbling or rolling?

### Did many residents perceive

- ☐ Yes | ☒ **No** - A clear shaking of the building?  
☐ Yes | ☒ **No** - A loud rumble?

### Have we witnessed

- ☐ Yes | ☒ **No** - The oscillation of chandeliers or freely suspended objects?  
☐ Yes | ☒ **No** - Swinging chairs or beds?  
☐ Yes | ☒ **No** - Cracking ceilings?  
☐ Yes | ☒ **No** - Sleepers waking up?

### Has it been witnessed or later observed

- ☐ Yes | ☒ **No** - The shivering of windows and doors?  
☐ Yes | ☒ **No** - The shaking of movable objects (tables, vases, knick-knacks, ...)?

### Has it been witnessed or later observed

- ☐ Yes | ☒ **No** - The clattering of glasses and dishes in buffets?  
☐ Yes | ☒ **No** - The swaying of frames hanging on the wall?  
☐ Yes | ☒ **No** - The creaking of floors?  
☐ Yes | ☒ **No** - Small fragments of plaster falling from ceilings?  
☐ Yes | ☒ **No** - A confusion of the inhabitants (people leaving the house).

### Has it been observed

- ☐ Yes | ☒ **No** - Moving knick-knacks?  
☐ Yes | ☒ **No** - Moving light objects?  
 Which ones?:  
☐ Yes | ☒ **No** - The falling of frames hanging on the wall?  
☐ Yes | ☒ **No** - The falling of light objects placed on polished furniture or marble  
☐ Yes | ☒ **No** - Cracked or broken windows?  
☐ Yes | ☒ **No** - Broken crockery?  
☐ Yes | ☒ **No** - Light objects (vases, flower pots, etc.) spilled?  
☐ Yes | ☒ **No** - Has light furniture moved?  
☐ Yes | ☒ **No** - Has heavy furniture (chests, stoves, ...) vibrated?  
☐ Yes | ☒ **No** - Did bells tinkle?  
☐ Yes | ☒ **No** - Did heavy furniture move?  
☐ Yes | ☒ **No** - Did light furniture tip over?  
☐ Yes | ☒ **No** - Have doors been moved on their hinges?

### Has it been observed

- ☐ Yes | ☒ **No** - Falling pieces of plaster from the ceilings?  
☐ Yes | ☒ **No** - Cracks in wall plaster?  
☐ Yes | ☒ **No** - An exceptional fall of a chimney in poor condition?  
☐ Yes | ☒ **No** - An exceptional fall of some bricks?  
☐ Yes | ☒ **No** - Have there been several damaged chimneys?

How many?:

- ☐ Yes | ☒ **No** - Have there been several chimneys overturned?

How many?:

% for the municipality?:

- ☐ Yes | ☒ **No** - Have there been any falls of façade ornaments?

How important?:

- ☐ Yes | ☒ **No** - Have there been deep cracks in the brick walls?  
☐ Yes | ☒ **No** - Have there been deep cracks in the concrete walls?  
☐ Yes | ☒ **No** - Have there been landslides along the banks or slopes?

Importance:

ADDITIONAL COMMENTS:

## Official inquiry for NOUVELLES (BE)

Location: 50.412°N 3.969°E, at 6.6 km from the epicentre.

**Imin: 3 - Imax: 3**

### Did some residents perceive

- ☒ **Yes** | ☐ No - Light vibrations?  
☒ **Yes** | ☐ No - A characteristic noise: rumbling or rolling?

### Did many residents perceive

- ☐ Yes | ☒ **No** - A clear shaking of the building?  
☐ Yes | ☒ **No** - A loud rumble?

### Have we witnessed

- ☒ **Yes** | ☐ No - The oscillation of chandeliers or freely suspended objects?  
☒ **Yes** | ☐ No - Swinging chairs or beds?  
☐ Yes | ☒ **No** - Cracking ceilings?  
☐ Yes | ☒ **No** - Sleepers waking up?

### Has it been witnessed or later observed

- ☒ **Yes** | ☐ No - The shivering of windows and doors?  
☒ **Yes** | ☐ No - The shaking of movable objects (tables, vases, knick-knacks, ...)?

### Has it been witnessed or later observed

- ☐ Yes | ☒ **No** - The clattering of glasses and dishes in buffets?  
☐ Yes | ☒ **No** - The swaying of frames hanging on the wall?  
☐ Yes | ☒ **No** - The creaking of floors?  
☐ Yes | ☒ **No** - Small fragments of plaster falling from ceilings?  
☐ Yes | ☒ **No** - A confusion of the inhabitants (people leaving the house).

### Has it been observed

- ☐ Yes | ☒ **No** - Moving knick-knacks?  
☐ Yes | ☒ **No** - Moving light objects?  
 Which ones?:  
☐ Yes | ☒ **No** - The falling of frames hanging on the wall?  
☐ Yes | ☒ **No** - The falling of light objects placed on polished furniture or marble  
☐ Yes | ☒ **No** - Cracked or broken windows?  
☐ Yes | ☒ **No** - Broken crockery?  
☐ Yes | ☒ **No** - Light objects (vases, flower pots, etc.) spilled?  
☐ Yes | ☒ **No** - Has light furniture moved?  
☐ Yes | ☒ **No** - Has heavy furniture (chests, stoves, ...) vibrated?  
☐ Yes | ☒ **No** - Did bells tinkle?  
☐ Yes | ☒ **No** - Did heavy furniture move?  
☐ Yes | ☒ **No** - Did light furniture tip over?  
☐ Yes | ☒ **No** - Have doors been moved on their hinges?

### Has it been observed

- ☐ Yes | ☒ **No** - Falling pieces of plaster from the ceilings?  
☐ Yes | ☒ **No** - Cracks in wall plaster?  
☐ Yes | ☒ **No** - An exceptional fall of a chimney in poor condition?  
☐ Yes | ☒ **No** - An exceptional fall of some bricks?  
☐ Yes | ☒ **No** - Have there been several damaged chimneys?

How many?:

- ☐ Yes | ☒ **No** - Have there been several chimneys overturned?

How many?:

% for the municipality?:

- ☐ Yes | ☒ **No** - Have there been any falls of façade ornaments?

How important?:

- ☐ Yes | ☒ **No** - Have there been deep cracks in the brick walls?  
☐ Yes | ☒ **No** - Have there been deep cracks in the concrete walls?  
☐ Yes | ☒ **No** - Have there been landslides along the banks or slopes?

Importance:

ADDITIONAL COMMENTS:

## Official inquiry for PATURAGES (BE)

Location: 50.414°N 3.862°E, at 2.2 km from the epicentre.

**Imin: 4 - Imax: 4**

### Did some residents perceive

- ☒ **Yes** | ☐ No - Light vibrations?  
☐ Yes | ☒ **No** - A characteristic noise: rumbling or rolling?

### Did many residents perceive

- ☐ Yes | ☒ **No** - A clear shaking of the building?  
☐ Yes | ☒ **No** - A loud rumble?

### Have we witnessed

- ☐ Yes | ☒ **No** - The oscillation of chandeliers or freely suspended objects?  
☐ Yes | ☒ **No** - Swinging chairs or beds?  
☒ **Yes** | ☐ No - Cracking ceilings?  
☒ **Yes** | ☐ No - Sleepers waking up?

### Has it been witnessed or later observed

- ☒ **Yes** | ☐ No - The shivering of windows and doors?  
☐ Yes | ☒ **No** - The shaking of movable objects (tables, vases, knick-knacks, ...)?

### Has it been witnessed or later observed

- ☒ **Yes** | ☐ No - The clattering of glasses and dishes in buffets?  
☐ Yes | ☒ **No** - The swaying of frames hanging on the wall?  
☐ Yes | ☒ **No** - The creaking of floors?  
☐ Yes | ☒ **No** - Small fragments of plaster falling from ceilings?  
☐ Yes | ☒ **No** - A confusion of the inhabitants (people leaving the house).

### Has it been observed

- ☐ Yes | ☒ **No** - Moving knick-knacks?  
☐ Yes | ☒ **No** - Moving light objects?  
 Which ones?:  
☐ Yes | ☒ **No** - The falling of frames hanging on the wall?  
☐ Yes | ☒ **No** - The falling of light objects placed on polished furniture or marble  
☐ Yes | ☒ **No** - Cracked or broken windows?  
☐ Yes | ☒ **No** - Broken crockery?  
☐ Yes | ☒ **No** - Light objects (vases, flower pots, etc.) spilled?  
☐ Yes | ☒ **No** - Has light furniture moved?  
☐ Yes | ☒ **No** - Has heavy furniture (chests, stoves, ...) vibrated?  
☐ Yes | ☒ **No** - Did bells tinkle?  
☐ Yes | ☒ **No** - Did heavy furniture move?  
☐ Yes | ☒ **No** - Did light furniture tip over?  
☐ Yes | ☒ **No** - Have doors been moved on their hinges?

### Has it been observed

- ☐ Yes | ☒ **No** - Falling pieces of plaster from the ceilings?  
☐ Yes | ☒ **No** - Cracks in wall plaster?  
☐ Yes | ☒ **No** - An exceptional fall of a chimney in poor condition?  
☐ Yes | ☒ **No** - An exceptional fall of some bricks?  
☐ Yes | ☒ **No** - Have there been several damaged chimneys?

How many?:

- ☐ Yes | ☒ **No** - Have there been several chimneys overturned?

How many?:

% for the municipality?:

- ☐ Yes | ☒ **No** - Have there been any falls of façade ornaments?

How important?:

- ☐ Yes | ☒ **No** - Have there been deep cracks in the brick walls?  
☐ Yes | ☒ **No** - Have there been deep cracks in the concrete walls?  
☐ Yes | ☒ **No** - Have there been landslides along the banks or slopes?

Importance:

ADDITIONAL COMMENTS:

## Official inquiry for QUAREGNON (BE)

Location: 50.443°N 3.865°E, at 1.8 km from the epicentre.

**Imin: 4 - Imax: 4**

### Did some residents perceive

- ☒ **Yes** | ☐ No - Light vibrations?  
☒ **Yes** | ☐ No - A characteristic noise: rumbling or rolling?

### Did many residents perceive

- ☐ Yes | ☒ **No** - A clear shaking of the building?  
☐ Yes | ☒ **No** - A loud rumble?

### Have we witnessed

- ☐ Yes | ☒ **No** - The oscillation of chandeliers or freely suspended objects?  
☐ Yes | ☒ **No** - Swinging chairs or beds?  
☐ Yes | ☒ **No** - Cracking ceilings?  
☒ **Yes** | ☐ No - Sleepers waking up?

### Has it been witnessed or later observed

- ☐ Yes | ☒ **No** - The shivering of windows and doors?  
☐ Yes | ☒ **No** - The shaking of movable objects (tables, vases, knick-knacks, ...)?

### Has it been witnessed or later observed

- ☐ Yes | ☒ **No** - The clattering of glasses and dishes in buffets?  
☐ Yes | ☒ **No** - The swaying of frames hanging on the wall?  
☐ Yes | ☒ **No** - The creaking of floors?  
☐ Yes | ☒ **No** - Small fragments of plaster falling from ceilings?  
☒ **Yes** | ☐ No - A confusion of the inhabitants (people leaving the house).

### Has it been observed

- ☐ Yes | ☒ **No** - Moving knick-knacks?  
☐ Yes | ☒ **No** - Moving light objects?  
 Which ones?:  
☐ Yes | ☒ **No** - The falling of frames hanging on the wall?  
☐ Yes | ☒ **No** - The falling of light objects placed on polished furniture or marble  
☐ Yes | ☒ **No** - Cracked or broken windows?  
☐ Yes | ☒ **No** - Broken crockery?  
☐ Yes | ☒ **No** - Light objects (vases, flower pots, etc.) spilled?  
☐ Yes | ☒ **No** - Has light furniture moved?  
☐ Yes | ☒ **No** - Has heavy furniture (chests, stoves, ...) vibrated?  
☐ Yes | ☒ **No** - Did bells tinkle?  
☐ Yes | ☒ **No** - Did heavy furniture move?  
☐ Yes | ☒ **No** - Did light furniture tip over?  
☐ Yes | ☒ **No** - Have doors been moved on their hinges?

### Has it been observed

- ☐ Yes | ☒ **No** - Falling pieces of plaster from the ceilings?  
☐ Yes | ☒ **No** - Cracks in wall plaster?  
☐ Yes | ☒ **No** - An exceptional fall of a chimney in poor condition?  
☒ **Yes** | ☐ No - An exceptional fall of some bricks?  
☐ Yes | ☒ **No** - Have there been several damaged chimneys?

How many?:

- ☐ Yes | ☒ **No** - Have there been several chimneys overturned?

How many?:

% for the municipality?:

- ☐ Yes | ☒ **No** - Have there been any falls of façade ornaments?

How important?:

- ☐ Yes | ☒ **No** - Have there been deep cracks in the brick walls?  
☐ Yes | ☒ **No** - Have there been deep cracks in the concrete walls?  
☐ Yes | ☒ **No** - Have there been landslides along the banks or slopes?

Importance:

ADDITIONAL COMMENTS:

## Official inquiry for WASMES (BE)

Location: 50.422°N 3.847°E, at 2.5 km from the epicentre.

**Imin: 3 - Imax: 3**

### Did some residents perceive

- ☐ Yes | ☒ **No** - Light vibrations?  
☐ Yes | ☒ **No** - A characteristic noise: rumbling or rolling?

### Did many residents perceive

- ☐ Yes | ☒ **No** - A clear shaking of the building?  
☐ Yes | ☒ **No** - A loud rumble?

### Have we witnessed

- ☐ Yes | ☒ **No** - The oscillation of chandeliers or freely suspended objects?  
☐ Yes | ☒ **No** - Swinging chairs or beds?  
☐ Yes | ☒ **No** - Cracking ceilings?  
☐ Yes | ☒ **No** - Sleepers waking up?

### Has it been witnessed or later observed

- ☒ **Yes** | ☐ No - The shivering of windows and doors?  
☒ **Yes** | ☐ No - The shaking of movable objects (tables, vases, knick-knacks, ...)?

### Has it been witnessed or later observed

- ☐ Yes | ☒ **No** - The clattering of glasses and dishes in buffets?  
☐ Yes | ☒ **No** - The swaying of frames hanging on the wall?  
☐ Yes | ☒ **No** - The creaking of floors?  
☐ Yes | ☒ **No** - Small fragments of plaster falling from ceilings?  
☐ Yes | ☒ **No** - A confusion of the inhabitants (people leaving the house).

### Has it been observed

- ☐ Yes | ☒ **No** - Moving knick-knacks?  
☐ Yes | ☒ **No** - Moving light objects?

Which ones?:

- ☐ Yes | ☒ **No** - The falling of frames hanging on the wall?  
☐ Yes | ☒ **No** - The falling of light objects placed on polished furniture or marble  
☐ Yes | ☒ **No** - Cracked or broken windows?  
☐ Yes | ☒ **No** - Broken crockery?  
☐ Yes | ☒ **No** - Light objects (vases, flower pots, etc.) spilled?  
☐ Yes | ☒ **No** - Has light furniture moved?  
☐ Yes | ☒ **No** - Has heavy furniture (chests, stoves, ...) vibrated?  
☐ Yes | ☒ **No** - Did bells tinkle?  
☐ Yes | ☒ **No** - Did heavy furniture move?  
☐ Yes | ☒ **No** - Did light furniture tip over?  
☐ Yes | ☒ **No** - Have doors been moved on their hinges?

### Has it been observed

- ☐ Yes | ☒ **No** - Falling pieces of plaster from the ceilings?  
☐ Yes | ☒ **No** - Cracks in wall plaster?  
☐ Yes | ☒ **No** - An exceptional fall of a chimney in poor condition?  
☐ Yes | ☒ **No** - An exceptional fall of some bricks?  
☐ Yes | ☒ **No** - Have there been several damaged chimneys?

How many?:

- ☐ Yes | ☒ **No** - Have there been several chimneys overturned?

How many?:

% for the municipality?:

- ☐ Yes | ☒ **No** - Have there been any falls of façade ornaments?

How important?:

- ☐ Yes | ☒ **No** - Have there been deep cracks in the brick walls?  
☐ Yes | ☒ **No** - Have there been deep cracks in the concrete walls?  
☐ Yes | ☒ **No** - Have there been landslides along the banks or slopes?

Importance:

ADDITIONAL COMMENTS:
