# Supplementary material for: The damaging character of shallow 20th century earthquakes in the Hainaut coal area (Belgium)
Source: Copernicus journal article supplement (doi:10.5194/se-2021-74), 2021-07-13
Supplement: Supplementary file 1 [file se-2021-74-supplement.zip › 548_1952-10-22_FRAMERIES.csv]

Imin	Imax	lat	lon	Commune	d_epi	azimuth
2	2	50.4053	3.8758	LA BOUVERIE	2.37333364426	226.459751829
3	3	50.4136	3.8622	PATURAGES	2.77932227195	255.172957087
3	3	50.3931	3.9194	GENLY	3.29479925586	155.247628592
3	3	50.4381	3.92	CUESMES	2.46441173213	35.2078557144
4	4	50.455	3.948	MONS	5.17556008772	41.1958972449
3	3	50.4106	3.8942	FRAMERIES	1.12395832784	201.51922932
3	3	50.4203	3.9447	CIPLY	3.17695932138	89.3809215455
2	3	50.557	3.902	LENS	15.2403306303	0.532832453618
3	3	50.427	3.961	MESVIN	4.40428138048	79.7932858587
3	3	50.412	3.969	NOUVELLES	4.98427379214	100.258190589
3	4	50.4431	3.8653	QUAREGNON	3.56110355223	316.19757543
