# Supplementary material for: The damaging character of shallow 20th century earthquakes in the Hainaut coal area (Belgium)
Source: Copernicus journal article supplement (doi:10.5194/se-2021-74), 2021-07-13
Supplement: Supplementary file 1 [file se-2021-74-supplement.zip › 548_ROB_official_report.pdf]

# Royal Observatory of Belgium Official Macroseismic Inquiry

## FRAMERIES

1952-10-22 07:--:--

Magnitude  $M_w=2.8$

50.42°N 3.9°E [3.0] km

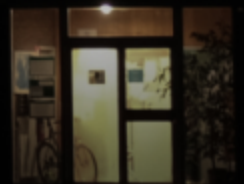



# Official Inquiries

|                    | Country | Latitude | Longitude | Epicentral Distance | Imin | Imax |
|--------------------|---------|----------|-----------|---------------------|------|------|
| <b>CIPLY</b>       | BE      | 50.42    | 3.945     | 3.2                 | 3    | 3    |
| <b>CUESMES</b>     | BE      | 50.438   | 3.92      | 2.5                 | 3    | 3    |
| <b>FRAMERIES</b>   | BE      | 50.411   | 3.894     | 1.1                 | 3    | 3    |
| <b>GENLY</b>       | BE      | 50.393   | 3.919     | 3.3                 | 3    | 3    |
| <b>LA BOUVERIE</b> | BE      | 50.405   | 3.876     | 2.4                 | 2    | 2    |
| <b>LENS</b>        | BE      | 50.557   | 3.902     | 15.2                | 2    | 3    |
| <b>MESVIN</b>      | BE      | 50.427   | 3.961     | 4.4                 | 3    | 3    |
| <b>MONS</b>        | BE      | 50.455   | 3.948     | 5.2                 | 4    | 4    |
| <b>NOUVELLES</b>   | BE      | 50.412   | 3.969     | 5                   | 3    | 3    |
| <b>PATURAGES</b>   | BE      | 50.414   | 3.862     | 2.8                 | 3    | 3    |
| <b>QUAREGNON</b>   | BE      | 50.443   | 3.865     | 3.6                 | 3    | 4    |



# Additional Intensities from other sources

# Individual Formulaires

## Official inquiry for CIPLY (BE)

Location: 50.42°N 3.945°E, at 3.2 km from the epicentre.

**Imin: 3 - Imax: 3**

### Did some residents perceive

- ☒ **Yes** | ☐ No - Light vibrations?  
☐ Yes | ☒ **No** - A characteristic noise: rumbling or rolling?

### Did many residents perceive

- ☐ Yes | ☒ **No** - A clear shaking of the building?  
☐ Yes | ☒ **No** - A loud rumble?

### Have we witnessed

- ☒ **Yes** | ☐ No - The oscillation of chandeliers or freely suspended objects?  
☐ Yes | ☒ **No** - Swinging chairs or beds?  
☐ Yes | ☒ **No** - Cracking ceilings?  
☐ Yes | ☒ **No** - Sleepers waking up?

### Has it been witnessed or later observed

- ☐ Yes | ☒ **No** - The shivering of windows and doors?  
☒ **Yes** | ☐ No - The shaking of movable objects (tables, vases, knick-knacks, ...)?

### Has it been witnessed or later observed

- ☐ Yes | ☒ **No** - The clattering of glasses and dishes in buffets?  
☐ Yes | ☒ **No** - The swaying of frames hanging on the wall?  
☐ Yes | ☒ **No** - The creaking of floors?  
☐ Yes | ☒ **No** - Small fragments of plaster falling from ceilings?  
☐ Yes | ☒ **No** - A confusion of the inhabitants (people leaving the house).

### Has it been observed

- ☐ Yes | ☒ **No** - Moving knick-knacks?  
☐ Yes | ☒ **No** - Moving light objects?  
 Which ones?:  
☐ Yes | ☒ **No** - The falling of frames hanging on the wall?  
☐ Yes | ☒ **No** - The falling of light objects placed on polished furniture or marble  
☐ Yes | ☒ **No** - Cracked or broken windows?  
☐ Yes | ☒ **No** - Broken crockery?  
☐ Yes | ☒ **No** - Light objects (vases, flower pots, etc.) spilled?  
☐ Yes | ☒ **No** - Has light furniture moved?  
☐ Yes | ☒ **No** - Has heavy furniture (chests, stoves, ...) vibrated?  
☐ Yes | ☒ **No** - Did bells tinkle?  
☐ Yes | ☒ **No** - Did heavy furniture move?  
☐ Yes | ☒ **No** - Did light furniture tip over?  
☐ Yes | ☒ **No** - Have doors been moved on their hinges?

### Has it been observed

- ☐ Yes | ☒ **No** - Falling pieces of plaster from the ceilings?  
☐ Yes | ☒ **No** - Cracks in wall plaster?  
☐ Yes | ☒ **No** - An exceptional fall of a chimney in poor condition?  
☐ Yes | ☒ **No** - An exceptional fall of some bricks?  
☐ Yes | ☒ **No** - Have there been several damaged chimneys?

How many?:

- ☐ Yes | ☒ **No** - Have there been several chimneys overturned?

How many?:

% for the municipality?:

- ☐ Yes | ☒ **No** - Have there been any falls of façade ornaments?

How important?:

- ☐ Yes | ☒ **No** - Have there been deep cracks in the brick walls?  
☐ Yes | ☒ **No** - Have there been deep cracks in the concrete walls?  
☐ Yes | ☒ **No** - Have there been landslides along the banks or slopes?

Importance:

ADDITIONAL COMMENTS:

## Official inquiry for CUESMES (BE)

Location: 50.438°N 3.92°E, at 2.5 km from the epicentre.

**Imin: 3 - Imax: 3**

### Did some residents perceive

- ☐ Yes | ☒ **No** - Light vibrations?  
☒ **Yes** | ☐ No - A characteristic noise: rumbling or rolling?

### Did many residents perceive

- ☐ Yes | ☒ **No** - A clear shaking of the building?  
☒ **Yes** | ☐ No - A loud rumble?

### Have we witnessed

- ☐ Yes | ☒ **No** - The oscillation of chandeliers or freely suspended objects?  
☐ Yes | ☒ **No** - Swinging chairs or beds?  
☐ Yes | ☒ **No** - Cracking ceilings?  
☐ Yes | ☒ **No** - Sleepers waking up?

### Has it been witnessed or later observed

- ☒ **Yes** | ☐ No - The shivering of windows and doors?  
☐ Yes | ☒ **No** - The shaking of movable objects (tables, vases, knick-knacks, ...)?

### Has it been witnessed or later observed

- ☐ Yes | ☒ **No** - The clattering of glasses and dishes in buffets?  
☐ Yes | ☒ **No** - The swaying of frames hanging on the wall?  
☐ Yes | ☒ **No** - The creaking of floors?  
☐ Yes | ☒ **No** - Small fragments of plaster falling from ceilings?  
☐ Yes | ☒ **No** - A confusion of the inhabitants (people leaving the house).

### Has it been observed

- ☐ Yes | ☒ **No** - Moving knick-knacks?  
☐ Yes | ☒ **No** - Moving light objects?

Which ones?:

- ☐ Yes | ☒ **No** - The falling of frames hanging on the wall?  
☐ Yes | ☒ **No** - The falling of light objects placed on polished furniture or marble  
☐ Yes | ☒ **No** - Cracked or broken windows?  
☐ Yes | ☒ **No** - Broken crockery?  
☐ Yes | ☒ **No** - Light objects (vases, flower pots, etc.) spilled?  
☐ Yes | ☒ **No** - Has light furniture moved?  
☐ Yes | ☒ **No** - Has heavy furniture (chests, stoves, ...) vibrated?  
☐ Yes | ☒ **No** - Did bells tinkle?  
☐ Yes | ☒ **No** - Did heavy furniture move?  
☐ Yes | ☒ **No** - Did light furniture tip over?  
☐ Yes | ☒ **No** - Have doors been moved on their hinges?

### Has it been observed

- ☐ Yes | ☒ **No** - Falling pieces of plaster from the ceilings?  
☐ Yes | ☒ **No** - Cracks in wall plaster?  
☐ Yes | ☒ **No** - An exceptional fall of a chimney in poor condition?  
☐ Yes | ☒ **No** - An exceptional fall of some bricks?  
☐ Yes | ☒ **No** - Have there been several damaged chimneys?

How many?:

- ☐ Yes | ☒ **No** - Have there been several chimneys overturned?

How many?:

% for the municipality?:

- ☐ Yes | ☒ **No** - Have there been any falls of façade ornaments?

How important?:

- ☐ Yes | ☒ **No** - Have there been deep cracks in the brick walls?  
☐ Yes | ☒ **No** - Have there been deep cracks in the concrete walls?  
☐ Yes | ☒ **No** - Have there been landslides along the banks or slopes?

Importance:

ADDITIONAL COMMENTS: **les habitants qui ressentirent la vibration entendirent également une forte déflagration.**

## Official inquiry for FRAMERIES (BE)

Location: 50.411°N 3.894°E, at 1.1 km from the epicentre.

**Imin: 3 - Imax: 3**

### Did some residents perceive

- ☒ **Yes** | ☐ No - Light vibrations?  
☐ Yes | ☒ **No** - A characteristic noise: rumbling or rolling?

### Did many residents perceive

- ☐ Yes | ☒ **No** - A clear shaking of the building?  
☐ Yes | ☒ **No** - A loud rumble?

### Have we witnessed

- ☐ Yes | ☒ **No** - The oscillation of chandeliers or freely suspended objects?  
☐ Yes | ☒ **No** - Swinging chairs or beds?  
☐ Yes | ☒ **No** - Cracking ceilings?  
☒ **Yes** | ☐ No - Sleepers waking up?

### Has it been witnessed or later observed

- ☒ **Yes** | ☐ No - The shivering of windows and doors?  
☐ Yes | ☒ **No** - The shaking of movable objects (tables, vases, knick-knacks, ...)?

### Has it been witnessed or later observed

- ☐ Yes | ☒ **No** - The clattering of glasses and dishes in buffets?  
☐ Yes | ☒ **No** - The swaying of frames hanging on the wall?  
☐ Yes | ☒ **No** - The creaking of floors?  
☐ Yes | ☒ **No** - Small fragments of plaster falling from ceilings?  
☐ Yes | ☒ **No** - A confusion of the inhabitants (people leaving the house).

### Has it been observed

- ☐ Yes | ☒ **No** - Moving knick-knacks?  
☐ Yes | ☒ **No** - Moving light objects?  
 Which ones?:  
☐ Yes | ☒ **No** - The falling of frames hanging on the wall?  
☐ Yes | ☒ **No** - The falling of light objects placed on polished furniture or marble  
☐ Yes | ☒ **No** - Cracked or broken windows?  
☐ Yes | ☒ **No** - Broken crockery?  
☐ Yes | ☒ **No** - Light objects (vases, flower pots, etc.) spilled?  
☐ Yes | ☒ **No** - Has light furniture moved?  
☐ Yes | ☒ **No** - Has heavy furniture (chests, stoves, ...) vibrated?  
☐ Yes | ☒ **No** - Did bells tinkle?  
☐ Yes | ☒ **No** - Did heavy furniture move?  
☐ Yes | ☒ **No** - Did light furniture tip over?  
☐ Yes | ☒ **No** - Have doors been moved on their hinges?

### Has it been observed

- ☐ Yes | ☒ **No** - Falling pieces of plaster from the ceilings?  
☐ Yes | ☒ **No** - Cracks in wall plaster?  
☐ Yes | ☒ **No** - An exceptional fall of a chimney in poor condition?  
☐ Yes | ☒ **No** - An exceptional fall of some bricks?  
☐ Yes | ☒ **No** - Have there been several damaged chimneys?

How many?:

- ☐ Yes | ☒ **No** - Have there been several chimneys overturned?

How many?:

% for the municipality?:

- ☐ Yes | ☒ **No** - Have there been any falls of façade ornaments?

How important?:

- ☐ Yes | ☒ **No** - Have there been deep cracks in the brick walls?  
☐ Yes | ☒ **No** - Have there been deep cracks in the concrete walls?  
☐ Yes | ☒ **No** - Have there been landslides along the banks or slopes?

Importance:

ADDITIONAL COMMENTS:

## Official inquiry for GENLY (BE)

Location: 50.393°N 3.919°E, at 3.3 km from the epicentre.

**Imin: 3 - Imax: 3**

### Did some residents perceive

- ☐ Yes | ☒ **No** - Light vibrations?  
☒ **Yes** | ☐ No - A characteristic noise: rumbling or rolling?

### Did many residents perceive

- ☐ Yes | ☒ **No** - A clear shaking of the building?  
☐ Yes | ☒ **No** - A loud rumble?

### Have we witnessed

- ☐ Yes | ☒ **No** - The oscillation of chandeliers or freely suspended objects?  
☐ Yes | ☒ **No** - Swinging chairs or beds?  
☐ Yes | ☒ **No** - Cracking ceilings?  
☐ Yes | ☒ **No** - Sleepers waking up?

### Has it been witnessed or later observed

- ☒ **Yes** | ☐ No - The shivering of windows and doors?  
☐ Yes | ☒ **No** - The shaking of movable objects (tables, vases, knick-knacks, ...)?

### Has it been witnessed or later observed

- ☐ Yes | ☒ **No** - The clattering of glasses and dishes in buffets?  
☐ Yes | ☒ **No** - The swaying of frames hanging on the wall?  
☐ Yes | ☒ **No** - The creaking of floors?  
☐ Yes | ☒ **No** - Small fragments of plaster falling from ceilings?  
☐ Yes | ☒ **No** - A confusion of the inhabitants (people leaving the house).

### Has it been observed

- ☐ Yes | ☒ **No** - Moving knick-knacks?  
☐ Yes | ☒ **No** - Moving light objects?  
 Which ones?:  
☐ Yes | ☒ **No** - The falling of frames hanging on the wall?  
☐ Yes | ☒ **No** - The falling of light objects placed on polished furniture or marble  
☐ Yes | ☒ **No** - Cracked or broken windows?  
☐ Yes | ☒ **No** - Broken crockery?  
☐ Yes | ☒ **No** - Light objects (vases, flower pots, etc.) spilled?  
☐ Yes | ☒ **No** - Has light furniture moved?  
☐ Yes | ☒ **No** - Has heavy furniture (chests, stoves, ...) vibrated?  
☐ Yes | ☒ **No** - Did bells tinkle?  
☐ Yes | ☒ **No** - Did heavy furniture move?  
☐ Yes | ☒ **No** - Did light furniture tip over?  
☐ Yes | ☒ **No** - Have doors been moved on their hinges?

### Has it been observed

- ☐ Yes | ☒ **No** - Falling pieces of plaster from the ceilings?  
☐ Yes | ☒ **No** - Cracks in wall plaster?  
☐ Yes | ☒ **No** - An exceptional fall of a chimney in poor condition?  
☐ Yes | ☒ **No** - An exceptional fall of some bricks?  
☐ Yes | ☒ **No** - Have there been several damaged chimneys?

How many?:

- ☐ Yes | ☒ **No** - Have there been several chimneys overturned?

How many?:

% for the municipality?:

- ☐ Yes | ☒ **No** - Have there been any falls of façade ornaments?

How important?:

- ☐ Yes | ☒ **No** - Have there been deep cracks in the brick walls?  
☐ Yes | ☒ **No** - Have there been deep cracks in the concrete walls?  
☐ Yes | ☒ **No** - Have there been landslides along the banks or slopes?

Importance:

ADDITIONAL COMMENTS:

## Official inquiry for LA BOUVERIE (BE)

Location: 50.405°N 3.876°E, at 2.4 km from the epicentre.

**Imin: 2 - Imax: 2**

### Did some residents perceive

- ☒ **Yes** | ☐ **No** - Light vibrations?  
☐ **Yes** | ☒ **No** - A characteristic noise: rumbling or rolling?

### Did many residents perceive

- ☐ **Yes** | ☒ **No** - A clear shaking of the building?  
☐ **Yes** | ☒ **No** - A loud rumble?

### Have we witnessed

- ☐ **Yes** | ☒ **No** - The oscillation of chandeliers or freely suspended objects?  
☐ **Yes** | ☒ **No** - Swinging chairs or beds?  
☐ **Yes** | ☒ **No** - Cracking ceilings?  
☐ **Yes** | ☒ **No** - Sleepers waking up?

### Has it been witnessed or later observed

- ☐ **Yes** | ☒ **No** - The shivering of windows and doors?  
☐ **Yes** | ☒ **No** - The shaking of movable objects (tables, vases, knick-knacks, ...)?

### Has it been witnessed or later observed

- ☐ **Yes** | ☒ **No** - The clattering of glasses and dishes in buffets?  
☐ **Yes** | ☒ **No** - The swaying of frames hanging on the wall?  
☐ **Yes** | ☒ **No** - The creaking of floors?  
☐ **Yes** | ☒ **No** - Small fragments of plaster falling from ceilings?  
☐ **Yes** | ☒ **No** - A confusion of the inhabitants (people leaving the house).

### Has it been observed

- ☐ **Yes** | ☒ **No** - Moving knick-knacks?  
☐ **Yes** | ☒ **No** - Moving light objects?  
 Which ones?:  
☐ **Yes** | ☒ **No** - The falling of frames hanging on the wall?  
☐ **Yes** | ☒ **No** - The falling of light objects placed on polished furniture or marble  
☐ **Yes** | ☒ **No** - Cracked or broken windows?  
☐ **Yes** | ☒ **No** - Broken crockery?  
☐ **Yes** | ☒ **No** - Light objects (vases, flower pots, etc.) spilled?  
☐ **Yes** | ☒ **No** - Has light furniture moved?  
☐ **Yes** | ☒ **No** - Has heavy furniture (chests, stoves, ...) vibrated?  
☐ **Yes** | ☒ **No** - Did bells tinkle?  
☐ **Yes** | ☒ **No** - Did heavy furniture move?  
☐ **Yes** | ☒ **No** - Did light furniture tip over?  
☐ **Yes** | ☒ **No** - Have doors been moved on their hinges?

### Has it been observed

- ☐ **Yes** | ☒ **No** - Falling pieces of plaster from the ceilings?  
☐ **Yes** | ☒ **No** - Cracks in wall plaster?  
☐ **Yes** | ☒ **No** - An exceptional fall of a chimney in poor condition?  
☐ **Yes** | ☒ **No** - An exceptional fall of some bricks?  
☐ **Yes** | ☒ **No** - Have there been several damaged chimneys?

How many?:

- ☐ **Yes** | ☒ **No** - Have there been several chimneys overturned?

How many?:

% for the municipality?:

- ☐ **Yes** | ☒ **No** - Have there been any falls of façade ornaments?

How important?:

- ☐ **Yes** | ☒ **No** - Have there been deep cracks in the brick walls?  
☐ **Yes** | ☒ **No** - Have there been deep cracks in the concrete walls?  
☐ **Yes** | ☒ **No** - Have there been landslides along the banks or slopes?

Importance:

ADDITIONAL COMMENTS:

## Official inquiry for LENS (BE)

Location: 50.557°N 3.902°E, at 15.2 km from the epicentre.

**Imin: 2 - Imax: 3**

### Did some residents perceive

- ☐ Yes | ☒ **No** - Light vibrations?  
☐ Yes | ☒ **No** - A characteristic noise: rumbling or rolling?

### Did many residents perceive

- ☐ Yes | ☒ **No** - A clear shaking of the building?  
☐ Yes | ☒ **No** - A loud rumble?

### Have we witnessed

- ☐ Yes | ☒ **No** - The oscillation of chandeliers or freely suspended objects?  
☐ Yes | ☒ **No** - Swinging chairs or beds?  
☐ Yes | ☒ **No** - Cracking ceilings?  
☒ **Yes** | ☐ No - Sleepers waking up?

### Has it been witnessed or later observed

- ☐ Yes | ☒ **No** - The shivering of windows and doors?  
☐ Yes | ☒ **No** - The shaking of movable objects (tables, vases, knick-knacks, ...)?

### Has it been witnessed or later observed

- ☐ Yes | ☒ **No** - The clattering of glasses and dishes in buffets?  
☐ Yes | ☒ **No** - The swaying of frames hanging on the wall?  
☐ Yes | ☒ **No** - The creaking of floors?  
☐ Yes | ☒ **No** - Small fragments of plaster falling from ceilings?  
☒ **Yes** | ☐ No - A confusion of the inhabitants (people leaving the house).

### Has it been observed

- ☐ Yes | ☒ **No** - Moving knick-knacks?  
☐ Yes | ☒ **No** - Moving light objects?  
 Which ones?:  
☐ Yes | ☒ **No** - The falling of frames hanging on the wall?  
☐ Yes | ☒ **No** - The falling of light objects placed on polished furniture or marble  
☐ Yes | ☒ **No** - Cracked or broken windows?  
☐ Yes | ☒ **No** - Broken crockery?  
☐ Yes | ☒ **No** - Light objects (vases, flower pots, etc.) spilled?  
☐ Yes | ☒ **No** - Has light furniture moved?  
☐ Yes | ☒ **No** - Has heavy furniture (chests, stoves, ...) vibrated?  
☐ Yes | ☒ **No** - Did bells tinkle?  
☐ Yes | ☒ **No** - Did heavy furniture move?  
☐ Yes | ☒ **No** - Did light furniture tip over?  
☐ Yes | ☒ **No** - Have doors been moved on their hinges?

### Has it been observed

- ☐ Yes | ☒ **No** - Falling pieces of plaster from the ceilings?  
☐ Yes | ☒ **No** - Cracks in wall plaster?  
☐ Yes | ☒ **No** - An exceptional fall of a chimney in poor condition?  
☐ Yes | ☒ **No** - An exceptional fall of some bricks?  
☐ Yes | ☒ **No** - Have there been several damaged chimneys?

How many?:

- ☐ Yes | ☒ **No** - Have there been several chimneys overturned?

How many?:

% for the municipality?:

- ☐ Yes | ☒ **No** - Have there been any falls of façade ornaments?

How important?:

- ☐ Yes | ☒ **No** - Have there been deep cracks in the brick walls?  
☐ Yes | ☒ **No** - Have there been deep cracks in the concrete walls?  
☐ Yes | ☒ **No** - Have there been landslides along the banks or slopes?

Importance:

ADDITIONAL COMMENTS:

## Official inquiry for MESVIN (BE)

Location: 50.427°N 3.961°E, at 4.4 km from the epicentre.

**Imin: 3 - Imax: 3**

### Did some residents perceive

- ☒ **Yes** | ☐ No - Light vibrations?  
☒ **Yes** | ☐ No - A characteristic noise: rumbling or rolling?

### Did many residents perceive

- ☐ Yes | ☒ **No** - A clear shaking of the building?  
☐ Yes | ☒ **No** - A loud rumble?

### Have we witnessed

- ☒ **Yes** | ☐ No - The oscillation of chandeliers or freely suspended objects?  
☒ **Yes** | ☐ No - Swinging chairs or beds?  
☐ Yes | ☒ **No** - Cracking ceilings?  
☐ Yes | ☒ **No** - Sleepers waking up?

### Has it been witnessed or later observed

- ☒ **Yes** | ☐ No - The shivering of windows and doors?  
☒ **Yes** | ☐ No - The shaking of movable objects (tables, vases, knick-knacks, ...)?

### Has it been witnessed or later observed

- ☐ Yes | ☒ **No** - The clattering of glasses and dishes in buffets?  
☐ Yes | ☒ **No** - The swaying of frames hanging on the wall?  
☐ Yes | ☒ **No** - The creaking of floors?  
☐ Yes | ☒ **No** - Small fragments of plaster falling from ceilings?  
☐ Yes | ☒ **No** - A confusion of the inhabitants (people leaving the house).

### Has it been observed

- ☐ Yes | ☒ **No** - Moving knick-knacks?  
☐ Yes | ☒ **No** - Moving light objects?  
 Which ones?:  
☐ Yes | ☒ **No** - The falling of frames hanging on the wall?  
☐ Yes | ☒ **No** - The falling of light objects placed on polished furniture or marble  
☐ Yes | ☒ **No** - Cracked or broken windows?  
☐ Yes | ☒ **No** - Broken crockery?  
☐ Yes | ☒ **No** - Light objects (vases, flower pots, etc.) spilled?  
☐ Yes | ☒ **No** - Has light furniture moved?  
☐ Yes | ☒ **No** - Has heavy furniture (chests, stoves, ...) vibrated?  
☐ Yes | ☒ **No** - Did bells tinkle?  
☐ Yes | ☒ **No** - Did heavy furniture move?  
☐ Yes | ☒ **No** - Did light furniture tip over?  
☐ Yes | ☒ **No** - Have doors been moved on their hinges?

### Has it been observed

- ☐ Yes | ☒ **No** - Falling pieces of plaster from the ceilings?  
☐ Yes | ☒ **No** - Cracks in wall plaster?  
☐ Yes | ☒ **No** - An exceptional fall of a chimney in poor condition?  
☐ Yes | ☒ **No** - An exceptional fall of some bricks?  
☐ Yes | ☒ **No** - Have there been several damaged chimneys?

How many?:

- ☐ Yes | ☒ **No** - Have there been several chimneys overturned?

How many?:

% for the municipality?:

- ☐ Yes | ☒ **No** - Have there been any falls of façade ornaments?

How important?:

- ☐ Yes | ☒ **No** - Have there been deep cracks in the brick walls?  
☐ Yes | ☒ **No** - Have there been deep cracks in the concrete walls?  
☐ Yes | ☒ **No** - Have there been landslides along the banks or slopes?

Importance:

ADDITIONAL COMMENTS:

## Official inquiry for MONS (BE)

Location: 50.455°N 3.948°E, at 5.2 km from the epicentre.

**Imin: 4 - Imax: 4**

### Did some residents perceive

- ☐ Yes | ☒ **No** - Light vibrations?  
☒ **Yes** | ☐ No - A characteristic noise: rumbling or rolling?

### Did many residents perceive

- ☒ **Yes** | ☐ No - A clear shaking of the building?  
☒ **Yes** | ☐ No - A loud rumble?

### Have we witnessed

- ☐ Yes | ☒ **No** - The oscillation of chandeliers or freely suspended objects?  
☐ Yes | ☒ **No** - Swinging chairs or beds?  
☐ Yes | ☒ **No** - Cracking ceilings?  
☒ **Yes** | ☐ No - Sleepers waking up?

### Has it been witnessed or later observed

- ☐ Yes | ☒ **No** - The shivering of windows and doors?  
☒ **Yes** | ☐ No - The shaking of movable objects (tables, vases, knick-knacks, ...)?

### Has it been witnessed or later observed

- ☒ **Yes** | ☐ No - The clattering of glasses and dishes in buffets?  
☐ Yes | ☒ **No** - The swaying of frames hanging on the wall?  
☐ Yes | ☒ **No** - The creaking of floors?  
☐ Yes | ☒ **No** - Small fragments of plaster falling from ceilings?  
☐ Yes | ☒ **No** - A confusion of the inhabitants (people leaving the house).

### Has it been observed

- ☐ Yes | ☒ **No** - Moving knick-knacks?  
☐ Yes | ☒ **No** - Moving light objects?  
 Which ones?:  
☐ Yes | ☒ **No** - The falling of frames hanging on the wall?  
☐ Yes | ☒ **No** - The falling of light objects placed on polished furniture or marble  
☐ Yes | ☒ **No** - Cracked or broken windows?  
☐ Yes | ☒ **No** - Broken crockery?  
☐ Yes | ☒ **No** - Light objects (vases, flower pots, etc.) spilled?  
☐ Yes | ☒ **No** - Has light furniture moved?  
☒ **Yes** | ☐ No - Has heavy furniture (chests, stoves, ...) vibrated?  
☐ Yes | ☒ **No** - Did bells tinkle?  
☐ Yes | ☒ **No** - Did heavy furniture move?  
☐ Yes | ☒ **No** - Did light furniture tip over?  
☐ Yes | ☒ **No** - Have doors been moved on their hinges?

### Has it been observed

- ☐ Yes | ☒ **No** - Falling pieces of plaster from the ceilings?  
☐ Yes | ☒ **No** - Cracks in wall plaster?  
☐ Yes | ☒ **No** - An exceptional fall of a chimney in poor condition?  
☐ Yes | ☒ **No** - An exceptional fall of some bricks?  
☐ Yes | ☒ **No** - Have there been several damaged chimneys?

How many?:

- ☐ Yes | ☒ **No** - Have there been several chimneys overturned?

How many?:

% for the municipality?:

- ☐ Yes | ☒ **No** - Have there been any falls of façade ornaments?

How important?:

- ☐ Yes | ☒ **No** - Have there been deep cracks in the brick walls?  
☐ Yes | ☒ **No** - Have there been deep cracks in the concrete walls?  
☐ Yes | ☒ **No** - Have there been landslides along the banks or slopes?

Importance:

ADDITIONAL COMMENTS:

## Official inquiry for NOUVELLES (BE)

Location: 50.412°N 3.969°E, at 5.0 km from the epicentre.

**Imin: 3 - Imax: 3**

### Did some residents perceive

- ☒ **Yes** | ☐ No - Light vibrations?  
☒ **Yes** | ☐ No - A characteristic noise: rumbling or rolling?

### Did many residents perceive

- ☐ Yes | ☒ **No** - A clear shaking of the building?  
☐ Yes | ☒ **No** - A loud rumble?

### Have we witnessed

- ☒ **Yes** | ☐ No - The oscillation of chandeliers or freely suspended objects?  
☒ **Yes** | ☐ No - Swinging chairs or beds?  
☐ Yes | ☒ **No** - Cracking ceilings?  
☐ Yes | ☒ **No** - Sleepers waking up?

### Has it been witnessed or later observed

- ☒ **Yes** | ☐ No - The shivering of windows and doors?  
☒ **Yes** | ☐ No - The shaking of movable objects (tables, vases, knick-knacks, ...)?

### Has it been witnessed or later observed

- ☐ Yes | ☒ **No** - The clattering of glasses and dishes in buffets?  
☐ Yes | ☒ **No** - The swaying of frames hanging on the wall?  
☐ Yes | ☒ **No** - The creaking of floors?  
☐ Yes | ☒ **No** - Small fragments of plaster falling from ceilings?  
☐ Yes | ☒ **No** - A confusion of the inhabitants (people leaving the house).

### Has it been observed

- ☐ Yes | ☒ **No** - Moving knick-knacks?  
☐ Yes | ☒ **No** - Moving light objects?  
 Which ones?:  
☐ Yes | ☒ **No** - The falling of frames hanging on the wall?  
☐ Yes | ☒ **No** - The falling of light objects placed on polished furniture or marble  
☐ Yes | ☒ **No** - Cracked or broken windows?  
☐ Yes | ☒ **No** - Broken crockery?  
☐ Yes | ☒ **No** - Light objects (vases, flower pots, etc.) spilled?  
☐ Yes | ☒ **No** - Has light furniture moved?  
☐ Yes | ☒ **No** - Has heavy furniture (chests, stoves, ...) vibrated?  
☐ Yes | ☒ **No** - Did bells tinkle?  
☐ Yes | ☒ **No** - Did heavy furniture move?  
☐ Yes | ☒ **No** - Did light furniture tip over?  
☐ Yes | ☒ **No** - Have doors been moved on their hinges?

### Has it been observed

- ☐ Yes | ☒ **No** - Falling pieces of plaster from the ceilings?  
☐ Yes | ☒ **No** - Cracks in wall plaster?  
☐ Yes | ☒ **No** - An exceptional fall of a chimney in poor condition?  
☐ Yes | ☒ **No** - An exceptional fall of some bricks?  
☐ Yes | ☒ **No** - Have there been several damaged chimneys?

How many?:

- ☐ Yes | ☒ **No** - Have there been several chimneys overturned?

How many?:

% for the municipality?:

- ☐ Yes | ☒ **No** - Have there been any falls of façade ornaments?

How important?:

- ☐ Yes | ☒ **No** - Have there been deep cracks in the brick walls?  
☐ Yes | ☒ **No** - Have there been deep cracks in the concrete walls?  
☐ Yes | ☒ **No** - Have there been landslides along the banks or slopes?

Importance:

ADDITIONAL COMMENTS:

## Official inquiry for PATURAGES (BE)

Location: 50.414°N 3.862°E, at 2.8 km from the epicentre.

**Imin: 3 - Imax: 3**

### Did some residents perceive

- ☒ **Yes** | ☐ **No** - Light vibrations?  
☐ **Yes** | ☒ **No** - A characteristic noise: rumbling or rolling?

### Did many residents perceive

- ☐ **Yes** | ☒ **No** - A clear shaking of the building?  
☐ **Yes** | ☒ **No** - A loud rumble?

### Have we witnessed

- ☐ **Yes** | ☒ **No** - The oscillation of chandeliers or freely suspended objects?  
☐ **Yes** | ☒ **No** - Swinging chairs or beds?  
☐ **Yes** | ☒ **No** - Cracking ceilings?  
☐ **Yes** | ☒ **No** - Sleepers waking up?

### Has it been witnessed or later observed

- ☒ **Yes** | ☐ **No** - The shivering of windows and doors?  
☐ **Yes** | ☒ **No** - The shaking of movable objects (tables, vases, knick-knacks, ...)?

### Has it been witnessed or later observed

- ☐ **Yes** | ☒ **No** - The clattering of glasses and dishes in buffets?  
☐ **Yes** | ☒ **No** - The swaying of frames hanging on the wall?  
☐ **Yes** | ☒ **No** - The creaking of floors?  
☐ **Yes** | ☒ **No** - Small fragments of plaster falling from ceilings?  
☐ **Yes** | ☒ **No** - A confusion of the inhabitants (people leaving the house).

### Has it been observed

- ☐ **Yes** | ☒ **No** - Moving knick-knacks?  
☐ **Yes** | ☒ **No** - Moving light objects?  
 Which ones?:  
☐ **Yes** | ☒ **No** - The falling of frames hanging on the wall?  
☐ **Yes** | ☒ **No** - The falling of light objects placed on polished furniture or marble  
☐ **Yes** | ☒ **No** - Cracked or broken windows?  
☐ **Yes** | ☒ **No** - Broken crockery?  
☐ **Yes** | ☒ **No** - Light objects (vases, flower pots, etc.) spilled?  
☐ **Yes** | ☒ **No** - Has light furniture moved?  
☐ **Yes** | ☒ **No** - Has heavy furniture (chests, stoves, ...) vibrated?  
☐ **Yes** | ☒ **No** - Did bells tinkle?  
☐ **Yes** | ☒ **No** - Did heavy furniture move?  
☐ **Yes** | ☒ **No** - Did light furniture tip over?  
☐ **Yes** | ☒ **No** - Have doors been moved on their hinges?

### Has it been observed

- ☐ **Yes** | ☒ **No** - Falling pieces of plaster from the ceilings?  
☐ **Yes** | ☒ **No** - Cracks in wall plaster?  
☐ **Yes** | ☒ **No** - An exceptional fall of a chimney in poor condition?  
☐ **Yes** | ☒ **No** - An exceptional fall of some bricks?  
☐ **Yes** | ☒ **No** - Have there been several damaged chimneys?

How many?:

- ☐ **Yes** | ☒ **No** - Have there been several chimneys overturned?

How many?:

% for the municipality?:

- ☐ **Yes** | ☒ **No** - Have there been any falls of façade ornaments?

How important?:

- ☐ **Yes** | ☒ **No** - Have there been deep cracks in the brick walls?  
☐ **Yes** | ☒ **No** - Have there been deep cracks in the concrete walls?  
☐ **Yes** | ☒ **No** - Have there been landslides along the banks or slopes?

Importance:

ADDITIONAL COMMENTS:

## Official inquiry for QUAREGNON (BE)

Location: 50.443°N 3.865°E, at 3.6 km from the epicentre.

**Imin: 3 - Imax: 4**

### Did some residents perceive

- ☒ **Yes** | ☐ No - Light vibrations?  
☒ **Yes** | ☐ No - A characteristic noise: rumbling or rolling?

### Did many residents perceive

- ☒ **Yes** | ☐ No - A clear shaking of the building?  
☐ Yes | ☒ **No** - A loud rumble?

### Have we witnessed

- ☐ Yes | ☒ **No** - The oscillation of chandeliers or freely suspended objects?  
☐ Yes | ☒ **No** - Swinging chairs or beds?  
☐ Yes | ☒ **No** - Cracking ceilings?  
☒ **Yes** | ☐ No - Sleepers waking up?

### Has it been witnessed or later observed

- ☐ Yes | ☒ **No** - The shivering of windows and doors?  
☐ Yes | ☒ **No** - The shaking of movable objects (tables, vases, knick-knacks, ...)?

### Has it been witnessed or later observed

- ☐ Yes | ☒ **No** - The clattering of glasses and dishes in buffets?  
☐ Yes | ☒ **No** - The swaying of frames hanging on the wall?  
☐ Yes | ☒ **No** - The creaking of floors?  
☐ Yes | ☒ **No** - Small fragments of plaster falling from ceilings?  
☒ **Yes** | ☐ No - A confusion of the inhabitants (people leaving the house).

### Has it been observed

- ☐ Yes | ☒ **No** - Moving knick-knacks?  
☐ Yes | ☒ **No** - Moving light objects?  
 Which ones?:  
☐ Yes | ☒ **No** - The falling of frames hanging on the wall?  
☐ Yes | ☒ **No** - The falling of light objects placed on polished furniture or marble  
☐ Yes | ☒ **No** - Cracked or broken windows?  
☐ Yes | ☒ **No** - Broken crockery?  
☐ Yes | ☒ **No** - Light objects (vases, flower pots, etc.) spilled?  
☐ Yes | ☒ **No** - Has light furniture moved?  
☐ Yes | ☒ **No** - Has heavy furniture (chests, stoves, ...) vibrated?  
☐ Yes | ☒ **No** - Did bells tinkle?  
☐ Yes | ☒ **No** - Did heavy furniture move?  
☐ Yes | ☒ **No** - Did light furniture tip over?  
☐ Yes | ☒ **No** - Have doors been moved on their hinges?

### Has it been observed

- ☐ Yes | ☒ **No** - Falling pieces of plaster from the ceilings?  
☐ Yes | ☒ **No** - Cracks in wall plaster?  
☐ Yes | ☒ **No** - An exceptional fall of a chimney in poor condition?  
☒ **Yes** | ☐ No - An exceptional fall of some bricks?  
☐ Yes | ☒ **No** - Have there been several damaged chimneys?

How many?:

- ☐ Yes | ☒ **No** - Have there been several chimneys overturned?

How many?:

% for the municipality?:

- ☐ Yes | ☒ **No** - Have there been any falls of façade ornaments?

How important?:

- ☐ Yes | ☒ **No** - Have there been deep cracks in the brick walls?  
☐ Yes | ☒ **No** - Have there been deep cracks in the concrete walls?  
☐ Yes | ☒ **No** - Have there been landslides along the banks or slopes?

Importance:

ADDITIONAL COMMENTS:
