# Supplementary material for: The damaging character of shallow 20th century earthquakes in the Hainaut coal area (Belgium)
Source: Copernicus journal article supplement (doi:10.5194/se-2021-74), 2021-07-13
Supplement: Supplementary file 1 [file se-2021-74-supplement.zip › 549_1952-10-27_QUAREGNON.csv]

Imin	Imax	lat	lon	Commune	d_epi	azimuth
4	4	50.4011	3.8225	WARQUIGNIES	4.66183470569	226.420704239
3	4	50.4028	3.9586	ASQUILLIES	6.9863721718	115.628948686
4	4	50.4308	3.7675	HAININ	7.28354289241	270.739559619
3	3	50.3956	3.9878	HARVENG	9.20615823369	114.514945382
4	4	50.4222	3.8467	WASMES	1.86926739517	242.352709545
4	4	50.447	3.821	SAINT-GHISLAIN	3.96151838461	298.531465926
2	2	50.4664	4.0467	HAVRE	13.1874600118	72.0510771365
3	3	50.4747	4.0081	OBOURG	10.9963777467	63.063217717
3	3	50.5997	3.9406	LOMBISE	19.5301113441	14.8291338507
4	4	50.4733	3.9594	NIMY	7.96955826291	52.7817253533
5	5	50.4053	3.8758	LA BOUVERIE	2.77830763596	171.46519635
3	3	50.4272	3.9608	MESVIN	6.45942977804	92.7287958543
5	5	50.4136	3.8622	PATURAGES	1.9066469852	196.904653149
3	3	50.4258	3.9875	SPIENNES	8.36230458645	93.157459214
3	3	50.4381	4.0072	SAINT-SYMPHORIEN	9.78936453332	84.6660837333
4	4	50.4675	3.8119	TERTRE	5.86768229018	315.331671051
4	5	50.4847	3.8356	BAUDOUR	6.55677241886	338.139046827
4	4	50.3903	3.8883	EUGIES	4.60371356041	163.579751041
4	4	50.3931	3.9194	GENLY	5.40169837758	139.434616145
4	4	50.4017	3.9331	NOIRCHAIN	5.47940902161	125.041435293
5	5	50.4342	3.8292	HORNU	2.93629176196	279.171037993
5	5	50.4381	3.92	CUESMES	3.66489518559	75.7485183977
3	4	50.4414	3.9664	HYON	6.96521763565	79.4729109521
5	5	50.445	3.803	BOUSSU	5.04386601745	289.343781272
4	5	50.4458	3.8478	WASMUEL	2.36143327669	318.105298631
5	5	50.4494	3.8878	JEMAPPES	2.50119518365	30.3617541528
4	4	50.455	3.948	MONS	6.1994984108	63.3176480828
3	4	50.4106	3.8942	FRAMERIES	2.75951088322	141.436840863
4	4	50.4203	3.9447	CIPLY	5.41684755628	101.461014972
5	5	50.4431	3.8653	QUAREGNON	1.49497776691	347.095718625
5	5	50.4494	3.8878	FLENU	2.50119518365	30.3617541528
2	2	50.4781	3.9025	GHLIN	5.82713938955	23.3216741741
3	3	50.3611	4.0758	CROIX-LEZ-ROUVEROY	16.5191182406	117.563601578
3	4	50.3967	3.7803	DOUR	7.37372895338	239.878975643
4	4	50.4033	3.7539	ELOUGES	8.76994385048	250.249486483
3	3	50.4742	3.6525	HARCHIES	16.2107023766	287.739756854
2	2	50.4822	3.7647	HAUTRAGE	9.46761474427	307.87005797
2	2	50.5292	3.8583	HERCHIES	11.0660444346	355.700628038
3	3	50.5572	3.9025	LENS	14.3362488402	9.2444410574
3	3	50.4611	3.7131	POMMEROEUL	11.6693491158	287.305554236
3	3	50.3714	3.8794	SARS-LA-BRUYERE	6.55264623169	174.142447587
2	2	50.4131	4.1519	WAUDREZ	20.1217561084	95.2521190721
2	2	50.4794	4.0611	GOTTIGNIES	14.6417029471	67.88299753
3	3	50.4906	4.0194	SAINT-DENIS	12.569263058	57.5096412445
3	3	50.4833	3.7833	VILLEROT	8.54755708468	313.952822945
