# Supplementary material for: The damaging character of shallow 20th century earthquakes in the Hainaut coal area (Belgium)
Source: Copernicus journal article supplement (doi:10.5194/se-2021-74), 2021-07-13
Supplement: Supplementary file 1 [file se-2021-74-supplement.zip › 549_ROB_official_report.pdf]

# Royal Observatory of Belgium Official Macroseismic Inquiry

## QUAREGNON

1952-10-27 06:11:--

Magnitude  $M_w=3.5$

50.43°N 3.87°E 3.5 km

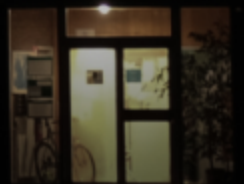



# Official Inquiries

|                           | Country | Latitude | Longitude | Epicentral Distance | Imin | Imax |
|---------------------------|---------|----------|-----------|---------------------|------|------|
| <b>ASQUILLIES</b>         | BE      | 50.403   | 3.959     | 7                   | 3    | 4    |
| <b>BAUDOUR</b>            | BE      | 50.485   | 3.836     | 6.6                 | 4    | 5    |
| <b>BOUSSU</b>             | BE      | 50.445   | 3.803     | 5                   | 5    | 5    |
| <b>CIPLY</b>              | BE      | 50.42    | 3.945     | 5.4                 | 4    | 4    |
| <b>CROIX-LEZ-ROUVEROY</b> | BE      | 50.361   | 4.076     | 16.5                | 3    | 3    |
| <b>CUESMES</b>            | BE      | 50.438   | 3.92      | 3.7                 | 5    | 5    |
| <b>DOUR</b>               | BE      | 50.397   | 3.78      | 7.4                 | 3    | 4    |
| <b>ELOUGES</b>            | BE      | 50.403   | 3.754     | 8.8                 | 4    | 4    |
| <b>EUGIES</b>             | BE      | 50.39    | 3.888     | 4.6                 | 4    | 4    |
| <b>FLENU</b>              | BE      | 50.449   | 3.888     | 2.5                 | 5    | 5    |
| <b>FRAMERIES</b>          | BE      | 50.411   | 3.894     | 2.8                 | 3    | 4    |
| <b>GENLY</b>              | BE      | 50.393   | 3.919     | 5.4                 | 4    | 4    |
| <b>GHLIN</b>              | BE      | 50.478   | 3.902     | 5.8                 | 2    | 2    |
| <b>GOTTIGNIES</b>         | BE      | 50.479   | 4.061     | 14.6                | 2    | 2    |
| <b>HAININ</b>             | BE      | 50.431   | 3.768     | 7.3                 | 4    | 4    |
| <b>HARCHIES</b>           | BE      | 50.474   | 3.652     | 16.2                | 3    | 3    |
| <b>HARVENG</b>            | BE      | 50.396   | 3.988     | 9.2                 | 3    | 3    |
| <b>HAUTRAGE</b>           | BE      | 50.482   | 3.765     | 9.5                 | 2    | 2    |
| <b>HAVRE</b>              | BE      | 50.466   | 4.047     | 13.2                | 2    | 2    |
| <b>HERCHIES</b>           | BE      | 50.529   | 3.858     | 11.1                | 2    | 2    |
| <b>HORNU</b>              | BE      | 50.434   | 3.829     | 2.9                 | 5    | 5    |
| <b>HYON</b>               | BE      | 50.441   | 3.966     | 7                   | 3    | 4    |
| <b>JEMAPPES</b>           | BE      | 50.449   | 3.888     | 2.5                 | 5    | 5    |
| <b>LA BOUVERIE</b>        | BE      | 50.405   | 3.876     | 2.8                 | 5    | 5    |
| <b>NIMY</b>               | BE      | 50.473   | 3.959     | 8                   | 4    | 4    |
| <b>NOIRCHAIN</b>          | BE      | 50.402   | 3.933     | 5.5                 | 4    | 4    |
| <b>OBOURG</b>             | BE      | 50.475   | 4.008     | 11                  | 3    | 3    |
| <b>PATURAGES</b>          | BE      | 50.414   | 3.862     | 1.9                 | 5    | 5    |
| <b>POMMEROEUL</b>         | BE      | 50.461   | 3.713     | 11.7                | 3    | 3    |
| <b>QUAREGNON</b>          | BE      | 50.443   | 3.865     | 1.5                 | 5    | 5    |
| <b>SAINT-DENIS</b>        | BE      | 50.491   | 4.019     | 12.6                | 3    | 3    |
| <b>SAINT-GHISLAIN</b>     | BE      | 50.447   | 3.821     | 4                   | 4    | 4    |
| <b>SAINT-SYMPHORIEN</b>   | BE      | 50.438   | 4.007     | 9.8                 | 3    | 3    |
| <b>SARS-LA-BRUYERE</b>    | BE      | 50.371   | 3.879     | 6.6                 | 3    | 3    |
| <b>SPIENNES</b>           | BE      | 50.426   | 3.988     | 8.4                 | 3    | 3    |
| <b>TERTRE</b>             | BE      | 50.468   | 3.812     | 5.9                 | 4    | 4    |
| <b>VILLEROT</b>           | BE      | 50.486   | 3.792     | 8.5                 | 3    | 3    |
| <b>WARQUIGNIES</b>        | BE      | 50.401   | 3.822     | 4.7                 | 4    | 4    |
| <b>WASMES</b>             | BE      | 50.422   | 3.847     | 1.9                 | 4    | 4    |
| <b>WASMUEL</b>            | BE      | 50.446   | 3.848     | 2.4                 | 4    | 5    |
| <b>WAUDREZ</b>            | BE      | 50.413   | 4.152     | 20.1                | 2    | 2    |



# Additional Intensities from other sources

|           | <b>Imin</b> | <b>Imax</b> | <b>Latitude</b> | <b>Longitude</b> | <b>Commune</b> | <b>Epicentral Distance</b> |
|-----------|-------------|-------------|-----------------|------------------|----------------|----------------------------|
| <b>11</b> | 3           | 3           | 50.427          | 3.961            | MESVIN         | 6.5                        |
| <b>26</b> | 4           | 4           | 50.455          | 3.948            | MONS           | 6.2                        |

# Individual Formulaires

## Official inquiry for ASQUILLIES (BE)

Location: 50.403°N 3.959°E, at 7.0 km from the epicentre.

**Imin: 3 - Imax: 4**

### Did some residents perceive

- ☐ Yes | ☒ **No** - Light vibrations?  
☐ Yes | ☒ **No** - A characteristic noise: rumbling or rolling?

### Did many residents perceive

- ☒ **Yes** | ☐ No - A clear shaking of the building?  
☒ **Yes** | ☐ No - A loud rumble?

### Have we witnessed

- ☐ Yes | ☒ **No** - The oscillation of chandeliers or freely suspended objects?  
☐ Yes | ☒ **No** - Swinging chairs or beds?  
☐ Yes | ☒ **No** - Cracking ceilings?  
☐ Yes | ☒ **No** - Sleepers waking up?

### Has it been witnessed or later observed

- ☐ Yes | ☒ **No** - The shivering of windows and doors?  
☐ Yes | ☒ **No** - The shaking of movable objects (tables, vases, knick-knacks, ...)?

### Has it been witnessed or later observed

- ☐ Yes | ☒ **No** - The clattering of glasses and dishes in buffets?  
☐ Yes | ☒ **No** - The swaying of frames hanging on the wall?  
☐ Yes | ☒ **No** - The creaking of floors?  
☐ Yes | ☒ **No** - Small fragments of plaster falling from ceilings?  
☐ Yes | ☒ **No** - A confusion of the inhabitants (people leaving the house).

### Has it been observed

- ☐ Yes | ☒ **No** - Moving knick-knacks?  
☐ Yes | ☒ **No** - Moving light objects?  
 Which ones?:  
☐ Yes | ☒ **No** - The falling of frames hanging on the wall?  
☐ Yes | ☒ **No** - The falling of light objects placed on polished furniture or marble  
☐ Yes | ☒ **No** - Cracked or broken windows?  
☐ Yes | ☒ **No** - Broken crockery?  
☐ Yes | ☒ **No** - Light objects (vases, flower pots, etc.) spilled?  
☐ Yes | ☒ **No** - Has light furniture moved?  
☐ Yes | ☒ **No** - Has heavy furniture (chests, stoves, ...) vibrated?  
☐ Yes | ☒ **No** - Did bells tinkle?  
☐ Yes | ☒ **No** - Did heavy furniture move?  
☐ Yes | ☒ **No** - Did light furniture tip over?  
☐ Yes | ☒ **No** - Have doors been moved on their hinges?

### Has it been observed

- ☐ Yes | ☒ **No** - Falling pieces of plaster from the ceilings?  
☐ Yes | ☒ **No** - Cracks in wall plaster?  
☐ Yes | ☒ **No** - An exceptional fall of a chimney in poor condition?  
☐ Yes | ☒ **No** - An exceptional fall of some bricks?  
☐ Yes | ☒ **No** - Have there been several damaged chimneys?

How many?:

- ☐ Yes | ☒ **No** - Have there been several chimneys overturned?

How many?:

% for the municipality?:

- ☐ Yes | ☒ **No** - Have there been any falls of façade ornaments?

How important?:

- ☐ Yes | ☒ **No** - Have there been deep cracks in the brick walls?  
☐ Yes | ☒ **No** - Have there been deep cracks in the concrete walls?  
☐ Yes | ☒ **No** - Have there been landslides along the banks or slopes?

Importance:

ADDITIONAL COMMENTS:

## Official inquiry for BAUDOUR (BE)

Location: 50.485°N 3.836°E, at 6.6 km from the epicentre.

**Imin: 4 - Imax: 5**

### Did some residents perceive

- ☐ Yes | ☒ **No** - Light vibrations?  
☐ Yes | ☒ **No** - A characteristic noise: rumbling or rolling?

### Did many residents perceive

- ☒ **Yes** | ☐ No - A clear shaking of the building?  
☒ **Yes** | ☐ No - A loud rumble?

### Have we witnessed

- ☒ **Yes** | ☐ No - The oscillation of chandeliers or freely suspended objects?  
☒ **Yes** | ☐ No - Swinging chairs or beds?  
☐ Yes | ☒ **No** - Cracking ceilings?  
☒ **Yes** | ☐ No - Sleepers waking up?

### Has it been witnessed or later observed

- ☐ Yes | ☒ **No** - The shivering of windows and doors?  
☐ Yes | ☒ **No** - The shaking of movable objects (tables, vases, knick-knacks, ...)?

### Has it been witnessed or later observed

- ☒ **Yes** | ☐ No - The clattering of glasses and dishes in buffets?  
☒ **Yes** | ☐ No - The swaying of frames hanging on the wall?  
☒ **Yes** | ☐ No - The creaking of floors?  
☒ **Yes** | ☐ No - Small fragments of plaster falling from ceilings?  
☒ **Yes** | ☐ No - A confusion of the inhabitants (people leaving the house).

### Has it been observed

- ☐ Yes | ☒ **No** - Moving knick-knacks?  
☐ Yes | ☒ **No** - Moving light objects?  
 Which ones?:  
☐ Yes | ☒ **No** - The falling of frames hanging on the wall?  
☐ Yes | ☒ **No** - The falling of light objects placed on polished furniture or marble  
☐ Yes | ☒ **No** - Cracked or broken windows?  
☐ Yes | ☒ **No** - Broken crockery?  
☐ Yes | ☒ **No** - Light objects (vases, flower pots, etc.) spilled?  
☐ Yes | ☒ **No** - Has light furniture moved?  
☒ **Yes** | ☐ No - Has heavy furniture (chests, stoves, ...) vibrated?  
☐ Yes | ☒ **No** - Did bells tinkle?  
☐ Yes | ☒ **No** - Did heavy furniture move?  
☐ Yes | ☒ **No** - Did light furniture tip over?  
☐ Yes | ☒ **No** - Have doors been moved on their hinges?

### Has it been observed

- ☐ Yes | ☒ **No** - Falling pieces of plaster from the ceilings?  
☐ Yes | ☒ **No** - Cracks in wall plaster?  
☐ Yes | ☒ **No** - An exceptional fall of a chimney in poor condition?  
☒ **Yes** | ☐ No - An exceptional fall of some bricks?  
☐ Yes | ☒ **No** - Have there been several damaged chimneys?

How many?:

- ☐ Yes | ☒ **No** - Have there been several chimneys overturned?

How many?:

% for the municipality?:

- ☐ Yes | ☒ **No** - Have there been any falls of façade ornaments?

How important?:

- ☐ Yes | ☒ **No** - Have there been deep cracks in the brick walls?  
☐ Yes | ☒ **No** - Have there been deep cracks in the concrete walls?  
☐ Yes | ☒ **No** - Have there been landslides along the banks or slopes?

Importance:

ADDITIONAL COMMENTS:

## Official inquiry for BOUSSU (BE)

Location: 50.445°N 3.803°E, at 5.0 km from the epicentre.

**Imin: 5 - Imax: 5**

### Did some residents perceive

- ☒ **Yes** | ☐ No - Light vibrations?  
☒ **Yes** | ☐ No - A characteristic noise: rumbling or rolling?

### Did many residents perceive

- ☐ Yes | ☒ **No** - A clear shaking of the building?  
☒ **Yes** | ☐ No - A loud rumble?

### Have we witnessed

- ☒ **Yes** | ☐ No - The oscillation of chandeliers or freely suspended objects?  
☐ Yes | ☒ **No** - Swinging chairs or beds?  
☐ Yes | ☒ **No** - Cracking ceilings?  
☐ Yes | ☒ **No** - Sleepers waking up?

### Has it been witnessed or later observed

- ☒ **Yes** | ☐ No - The shivering of windows and doors?  
☒ **Yes** | ☐ No - The shaking of movable objects (tables, vases, knick-knacks, ...)?

### Has it been witnessed or later observed

- ☒ **Yes** | ☐ No - The clattering of glasses and dishes in buffets?  
☐ Yes | ☒ **No** - The swaying of frames hanging on the wall?  
☐ Yes | ☒ **No** - The creaking of floors?  
☐ Yes | ☒ **No** - Small fragments of plaster falling from ceilings?  
☒ **Yes** | ☐ No - A confusion of the inhabitants (people leaving the house).

### Has it been observed

- ☐ Yes | ☒ **No** - Moving knick-knacks?  
☐ Yes | ☒ **No** - Moving light objects?  
 Which ones?:  
☐ Yes | ☒ **No** - The falling of frames hanging on the wall?  
☐ Yes | ☒ **No** - The falling of light objects placed on polished furniture or marble  
☐ Yes | ☒ **No** - Cracked or broken windows?  
☐ Yes | ☒ **No** - Broken crockery?  
☐ Yes | ☒ **No** - Light objects (vases, flower pots, etc.) spilled?  
☐ Yes | ☒ **No** - Has light furniture moved?  
☐ Yes | ☒ **No** - Has heavy furniture (chests, stoves, ...) vibrated?  
☐ Yes | ☒ **No** - Did bells tinkle?  
☐ Yes | ☒ **No** - Did heavy furniture move?  
☐ Yes | ☒ **No** - Did light furniture tip over?  
☐ Yes | ☒ **No** - Have doors been moved on their hinges?

### Has it been observed

- ☐ Yes | ☒ **No** - Falling pieces of plaster from the ceilings?  
☐ Yes | ☒ **No** - Cracks in wall plaster?  
☒ **Yes** | ☐ No - An exceptional fall of a chimney in poor condition?  
☐ Yes | ☒ **No** - An exceptional fall of some bricks?  
☐ Yes | ☒ **No** - Have there been several damaged chimneys?

How many?:

- ☐ Yes | ☒ **No** - Have there been several chimneys overturned?

How many?:

% for the municipality?:

- ☐ Yes | ☒ **No** - Have there been any falls of façade ornaments?

How important?:

- ☐ Yes | ☒ **No** - Have there been deep cracks in the brick walls?  
☐ Yes | ☒ **No** - Have there been deep cracks in the concrete walls?  
☐ Yes | ☒ **No** - Have there been landslides along the banks or slopes?

Importance:

ADDITIONAL COMMENTS:

## Official inquiry for CIPLY (BE)

Location: 50.42°N 3.945°E, at 5.4 km from the epicentre.

**Imin: 4 - Imax: 4**

### Did some residents perceive

- ☒ **Yes** | ☐ No - Light vibrations?  
☒ **Yes** | ☐ No - A characteristic noise: rumbling or rolling?

### Did many residents perceive

- ☐ Yes | ☒ **No** - A clear shaking of the building?  
☒ **Yes** | ☐ No - A loud rumble?

### Have we witnessed

- ☐ Yes | ☒ **No** - The oscillation of chandeliers or freely suspended objects?  
☐ Yes | ☒ **No** - Swinging chairs or beds?  
☐ Yes | ☒ **No** - Cracking ceilings?  
☒ **Yes** | ☐ No - Sleepers waking up?

### Has it been witnessed or later observed

- ☐ Yes | ☒ **No** - The shivering of windows and doors?  
☒ **Yes** | ☐ No - The shaking of movable objects (tables, vases, knick-knacks, ...)?

### Has it been witnessed or later observed

- ☐ Yes | ☒ **No** - The clattering of glasses and dishes in buffets?  
☐ Yes | ☒ **No** - The swaying of frames hanging on the wall?  
☐ Yes | ☒ **No** - The creaking of floors?  
☐ Yes | ☒ **No** - Small fragments of plaster falling from ceilings?  
☒ **Yes** | ☐ No - A confusion of the inhabitants (people leaving the house).

### Has it been observed

- ☐ Yes | ☒ **No** - Moving knick-knacks?  
☐ Yes | ☒ **No** - Moving light objects?  
 Which ones?:  
☐ Yes | ☒ **No** - The falling of frames hanging on the wall?  
☐ Yes | ☒ **No** - The falling of light objects placed on polished furniture or marble  
☐ Yes | ☒ **No** - Cracked or broken windows?  
☐ Yes | ☒ **No** - Broken crockery?  
☐ Yes | ☒ **No** - Light objects (vases, flower pots, etc.) spilled?  
☐ Yes | ☒ **No** - Has light furniture moved?  
☐ Yes | ☒ **No** - Has heavy furniture (chests, stoves, ...) vibrated?  
☐ Yes | ☒ **No** - Did bells tinkle?  
☐ Yes | ☒ **No** - Did heavy furniture move?  
☐ Yes | ☒ **No** - Did light furniture tip over?  
☐ Yes | ☒ **No** - Have doors been moved on their hinges?

### Has it been observed

- ☐ Yes | ☒ **No** - Falling pieces of plaster from the ceilings?  
☐ Yes | ☒ **No** - Cracks in wall plaster?  
☐ Yes | ☒ **No** - An exceptional fall of a chimney in poor condition?  
☐ Yes | ☒ **No** - An exceptional fall of some bricks?  
☐ Yes | ☒ **No** - Have there been several damaged chimneys?

How many?:

- ☐ Yes | ☒ **No** - Have there been several chimneys overturned?

How many?:

% for the municipality?:

- ☐ Yes | ☒ **No** - Have there been any falls of façade ornaments?

How important?:

- ☐ Yes | ☒ **No** - Have there been deep cracks in the brick walls?  
☐ Yes | ☒ **No** - Have there been deep cracks in the concrete walls?  
☐ Yes | ☒ **No** - Have there been landslides along the banks or slopes?

Importance:

ADDITIONAL COMMENTS:

## Official inquiry for CROIX-LEZ-ROUVEROY (BE)

Location: 50.361°N 4.076°E, at 16.5 km from the epicentre.

**Imin: 3 - Imax: 3**

### Did some residents perceive

- ☐ Yes | ☒ **No** - Light vibrations?  
☒ **Yes** | ☐ No - A characteristic noise: rumbling or rolling?

### Did many residents perceive

- ☒ **Yes** | ☐ No - A clear shaking of the building?  
☐ Yes | ☒ **No** - A loud rumble?

### Have we witnessed

- ☐ Yes | ☒ **No** - The oscillation of chandeliers or freely suspended objects?  
☐ Yes | ☒ **No** - Swinging chairs or beds?  
☐ Yes | ☒ **No** - Cracking ceilings?  
☐ Yes | ☒ **No** - Sleepers waking up?

### Has it been witnessed or later observed

- ☐ Yes | ☒ **No** - The shivering of windows and doors?  
☐ Yes | ☒ **No** - The shaking of movable objects (tables, vases, knick-knacks, ...)?

### Has it been witnessed or later observed

- ☐ Yes | ☒ **No** - The clattering of glasses and dishes in buffets?  
☐ Yes | ☒ **No** - The swaying of frames hanging on the wall?  
☐ Yes | ☒ **No** - The creaking of floors?  
☐ Yes | ☒ **No** - Small fragments of plaster falling from ceilings?  
☐ Yes | ☒ **No** - A confusion of the inhabitants (people leaving the house).

### Has it been observed

- ☐ Yes | ☒ **No** - Moving knick-knacks?  
☐ Yes | ☒ **No** - Moving light objects?

Which ones?:

- ☐ Yes | ☒ **No** - The falling of frames hanging on the wall?  
☐ Yes | ☒ **No** - The falling of light objects placed on polished furniture or marble  
☐ Yes | ☒ **No** - Cracked or broken windows?  
☐ Yes | ☒ **No** - Broken crockery?  
☐ Yes | ☒ **No** - Light objects (vases, flower pots, etc.) spilled?  
☐ Yes | ☒ **No** - Has light furniture moved?  
☐ Yes | ☒ **No** - Has heavy furniture (chests, stoves, ...) vibrated?  
☐ Yes | ☒ **No** - Did bells tinkle?  
☐ Yes | ☒ **No** - Did heavy furniture move?  
☐ Yes | ☒ **No** - Did light furniture tip over?  
☐ Yes | ☒ **No** - Have doors been moved on their hinges?

### Has it been observed

- ☐ Yes | ☒ **No** - Falling pieces of plaster from the ceilings?  
☐ Yes | ☒ **No** - Cracks in wall plaster?  
☐ Yes | ☒ **No** - An exceptional fall of a chimney in poor condition?  
☐ Yes | ☒ **No** - An exceptional fall of some bricks?  
☐ Yes | ☒ **No** - Have there been several damaged chimneys?

How many?:

- ☐ Yes | ☒ **No** - Have there been several chimneys overturned?

How many?:

% for the municipality?:

- ☐ Yes | ☒ **No** - Have there been any falls of façade ornaments?

How important?:

- ☐ Yes | ☒ **No** - Have there been deep cracks in the brick walls?  
☐ Yes | ☒ **No** - Have there been deep cracks in the concrete walls?  
☐ Yes | ☒ **No** - Have there been landslides along the banks or slopes?

Importance:

ADDITIONAL COMMENTS:

## Official inquiry for CUESMES (BE)

Location: 50.438°N 3.92°E, at 3.7 km from the epicentre.

**Imin: 5 - Imax: 5**

### Did some residents perceive

- ☒ **Yes** | ☐ No - Light vibrations?  
☒ **Yes** | ☐ No - A characteristic noise: rumbling or rolling?

### Did many residents perceive

- ☐ Yes | ☒ **No** - A clear shaking of the building?  
☐ Yes | ☒ **No** - A loud rumble?

### Have we witnessed

- ☐ Yes | ☒ **No** - The oscillation of chandeliers or freely suspended objects?  
☐ Yes | ☒ **No** - Swinging chairs or beds?  
☐ Yes | ☒ **No** - Cracking ceilings?  
☒ **Yes** | ☐ No - Sleepers waking up?

### Has it been witnessed or later observed

- ☒ **Yes** | ☐ No - The shivering of windows and doors?  
☒ **Yes** | ☐ No - The shaking of movable objects (tables, vases, knick-knacks, ...)?

### Has it been witnessed or later observed

- ☐ Yes | ☒ **No** - The clattering of glasses and dishes in buffets?  
☐ Yes | ☒ **No** - The swaying of frames hanging on the wall?  
☐ Yes | ☒ **No** - The creaking of floors?  
☐ Yes | ☒ **No** - Small fragments of plaster falling from ceilings?  
☐ Yes | ☒ **No** - A confusion of the inhabitants (people leaving the house).

### Has it been observed

- ☐ Yes | ☒ **No** - Moving knick-knacks?  
☐ Yes | ☒ **No** - Moving light objects?  
 Which ones?:  
☐ Yes | ☒ **No** - The falling of frames hanging on the wall?  
☐ Yes | ☒ **No** - The falling of light objects placed on polished furniture or marble  
☐ Yes | ☒ **No** - Cracked or broken windows?  
☒ **Yes** | ☐ No - Broken crockery?  
☐ Yes | ☒ **No** - Light objects (vases, flower pots, etc.) spilled?  
☐ Yes | ☒ **No** - Has light furniture moved?  
☐ Yes | ☒ **No** - Has heavy furniture (chests, stoves, ...) vibrated?  
☐ Yes | ☒ **No** - Did bells tinkle?  
☐ Yes | ☒ **No** - Did heavy furniture move?  
☐ Yes | ☒ **No** - Did light furniture tip over?  
☐ Yes | ☒ **No** - Have doors been moved on their hinges?

### Has it been observed

- ☐ Yes | ☒ **No** - Falling pieces of plaster from the ceilings?  
☐ Yes | ☒ **No** - Cracks in wall plaster?  
☐ Yes | ☒ **No** - An exceptional fall of a chimney in poor condition?  
☒ **Yes** | ☐ No - An exceptional fall of some bricks?  
☐ Yes | ☒ **No** - Have there been several damaged chimneys?

How many?:

- ☐ Yes | ☒ **No** - Have there been several chimneys overturned?

How many?:

% for the municipality?:

- ☐ Yes | ☒ **No** - Have there been any falls of façade ornaments?

How important?:

- ☐ Yes | ☒ **No** - Have there been deep cracks in the brick walls?  
☐ Yes | ☒ **No** - Have there been deep cracks in the concrete walls?  
☐ Yes | ☒ **No** - Have there been landslides along the banks or slopes?

Importance:

ADDITIONAL COMMENTS: **violente secousse qui a secoué la commune de Cuesmes à 7H11. Les personnes se trouvant sur la rue ont eu l'impression d'une formidable explosion alors que le sol tremblait sous leur pied. Quelques vieilles cheminées ont perdu quelques briques. On enregistre la chute et bris de vaisselle à l'intérieur des maisons. On signale également quelques carreaux cassés.**

## Official inquiry for DOUR (BE)

Location: 50.397°N 3.78°E, at 7.4 km from the epicentre.

**Imin: 3 - Imax: 4**

### Did some residents perceive

- ☐ Yes | ☒ **No** - Light vibrations?  
☒ **Yes** | ☐ No - A characteristic noise: rumbling or rolling?

### Did many residents perceive

- ☐ Yes | ☒ **No** - A clear shaking of the building?  
☐ Yes | ☒ **No** - A loud rumble?

### Have we witnessed

- ☐ Yes | ☒ **No** - The oscillation of chandeliers or freely suspended objects?  
☐ Yes | ☒ **No** - Swinging chairs or beds?  
☐ Yes | ☒ **No** - Cracking ceilings?  
☒ **Yes** | ☐ No - Sleepers waking up?

### Has it been witnessed or later observed

- ☐ Yes | ☒ **No** - The shivering of windows and doors?  
☐ Yes | ☒ **No** - The shaking of movable objects (tables, vases, knick-knacks, ...)?

### Has it been witnessed or later observed

- ☐ Yes | ☒ **No** - The clattering of glasses and dishes in buffets?  
☐ Yes | ☒ **No** - The swaying of frames hanging on the wall?  
☐ Yes | ☒ **No** - The creaking of floors?  
☐ Yes | ☒ **No** - Small fragments of plaster falling from ceilings?  
☐ Yes | ☒ **No** - A confusion of the inhabitants (people leaving the house).

### Has it been observed

- ☐ Yes | ☒ **No** - Moving knick-knacks?  
☐ Yes | ☒ **No** - Moving light objects?  
 Which ones?:  
☐ Yes | ☒ **No** - The falling of frames hanging on the wall?  
☐ Yes | ☒ **No** - The falling of light objects placed on polished furniture or marble  
☐ Yes | ☒ **No** - Cracked or broken windows?  
☐ Yes | ☒ **No** - Broken crockery?  
☐ Yes | ☒ **No** - Light objects (vases, flower pots, etc.) spilled?  
☐ Yes | ☒ **No** - Has light furniture moved?  
☐ Yes | ☒ **No** - Has heavy furniture (chests, stoves, ...) vibrated?  
☐ Yes | ☒ **No** - Did bells tinkle?  
☐ Yes | ☒ **No** - Did heavy furniture move?  
☐ Yes | ☒ **No** - Did light furniture tip over?  
☐ Yes | ☒ **No** - Have doors been moved on their hinges?

### Has it been observed

- ☐ Yes | ☒ **No** - Falling pieces of plaster from the ceilings?  
☐ Yes | ☒ **No** - Cracks in wall plaster?  
☐ Yes | ☒ **No** - An exceptional fall of a chimney in poor condition?  
☐ Yes | ☒ **No** - An exceptional fall of some bricks?  
☐ Yes | ☒ **No** - Have there been several damaged chimneys?

How many?:

- ☐ Yes | ☒ **No** - Have there been several chimneys overturned?

How many?:

% for the municipality?:

- ☐ Yes | ☒ **No** - Have there been any falls of façade ornaments?

How important?:

- ☐ Yes | ☒ **No** - Have there been deep cracks in the brick walls?  
☐ Yes | ☒ **No** - Have there been deep cracks in the concrete walls?  
☐ Yes | ☒ **No** - Have there been landslides along the banks or slopes?

Importance:

ADDITIONAL COMMENTS: **les personnes ont entendu un bruit lourd, comme le passage d'un gros camion sur la rue.**

## Official inquiry for ELOUGES (BE)

Location: 50.403°N 3.754°E, at 8.8 km from the epicentre.

**Imin: 4 - Imax: 4**

### Did some residents perceive

- ☐ Yes | ☒ **No** - Light vibrations?  
☐ Yes | ☒ **No** - A characteristic noise: rumbling or rolling?

### Did many residents perceive

- ☒ **Yes** | ☐ No - A clear shaking of the building?  
☐ Yes | ☒ **No** - A loud rumble?

### Have we witnessed

- ☐ Yes | ☒ **No** - The oscillation of chandeliers or freely suspended objects?  
☒ **Yes** | ☐ No - Swinging chairs or beds?  
☒ **Yes** | ☐ No - Cracking ceilings?  
☒ **Yes** | ☐ No - Sleepers waking up?

### Has it been witnessed or later observed

- ☒ **Yes** | ☐ No - The shivering of windows and doors?  
☒ **Yes** | ☐ No - The shaking of movable objects (tables, vases, knick-knacks, ...)?

### Has it been witnessed or later observed

- ☒ **Yes** | ☐ No - The clattering of glasses and dishes in buffets?  
☐ Yes | ☒ **No** - The swaying of frames hanging on the wall?  
☐ Yes | ☒ **No** - The creaking of floors?  
☐ Yes | ☒ **No** - Small fragments of plaster falling from ceilings?  
☒ **Yes** | ☐ No - A confusion of the inhabitants (people leaving the house).

### Has it been observed

- ☐ Yes | ☒ **No** - Moving knick-knacks?  
☐ Yes | ☒ **No** - Moving light objects?  
 Which ones?:  
☐ Yes | ☒ **No** - The falling of frames hanging on the wall?  
☐ Yes | ☒ **No** - The falling of light objects placed on polished furniture or marble  
☐ Yes | ☒ **No** - Cracked or broken windows?  
☐ Yes | ☒ **No** - Broken crockery?  
☐ Yes | ☒ **No** - Light objects (vases, flower pots, etc.) spilled?  
☐ Yes | ☒ **No** - Has light furniture moved?  
☐ Yes | ☒ **No** - Has heavy furniture (chests, stoves, ...) vibrated?  
☐ Yes | ☒ **No** - Did bells tinkle?  
☐ Yes | ☒ **No** - Did heavy furniture move?  
☐ Yes | ☒ **No** - Did light furniture tip over?  
☐ Yes | ☒ **No** - Have doors been moved on their hinges?

### Has it been observed

- ☐ Yes | ☒ **No** - Falling pieces of plaster from the ceilings?  
☐ Yes | ☒ **No** - Cracks in wall plaster?  
☐ Yes | ☒ **No** - An exceptional fall of a chimney in poor condition?  
☒ **Yes** | ☐ No - An exceptional fall of some bricks?  
☐ Yes | ☒ **No** - Have there been several damaged chimneys?

How many?:

- ☐ Yes | ☒ **No** - Have there been several chimneys overturned?

How many?:

% for the municipality?:

- ☐ Yes | ☒ **No** - Have there been any falls of façade ornaments?

How important?:

- ☐ Yes | ☒ **No** - Have there been deep cracks in the brick walls?  
☐ Yes | ☒ **No** - Have there been deep cracks in the concrete walls?  
☐ Yes | ☒ **No** - Have there been landslides along the banks or slopes?

Importance:

ADDITIONAL COMMENTS: **une seconde secousse, beaucoup plus faible, a été ressentie à 7H36 par une personne lorsqu'elle se trouvait couchée, mais bien éveillée, dans son lit. Le lendemain, au cours d'un entretien avec une personne de Dour, elle a eu confirmation de cette seconde secousse beaucoup plus faible que celle qui eut lieu 25 minutes plus tôt**

## Official inquiry for EUGIES (BE)

Location: 50.39°N 3.888°E, at 4.6 km from the epicentre.

**Imin: 4 - Imax: 4**

### Did some residents perceive

- ☐ Yes | ☒ **No** - Light vibrations?  
☐ Yes | ☒ **No** - A characteristic noise: rumbling or rolling?

### Did many residents perceive

- ☐ Yes | ☒ **No** - A clear shaking of the building?  
☒ **Yes** | ☐ No - A loud rumble?

### Have we witnessed

- ☐ Yes | ☒ **No** - The oscillation of chandeliers or freely suspended objects?  
☐ Yes | ☒ **No** - Swinging chairs or beds?  
☐ Yes | ☒ **No** - Cracking ceilings?  
☒ **Yes** | ☐ No - Sleepers waking up?

### Has it been witnessed or later observed

- ☐ Yes | ☒ **No** - The shivering of windows and doors?  
☒ **Yes** | ☐ No - The shaking of movable objects (tables, vases, knick-knacks, ...)?

### Has it been witnessed or later observed

- ☐ Yes | ☒ **No** - The clattering of glasses and dishes in buffets?  
☐ Yes | ☒ **No** - The swaying of frames hanging on the wall?  
☐ Yes | ☒ **No** - The creaking of floors?  
☐ Yes | ☒ **No** - Small fragments of plaster falling from ceilings?  
☒ **Yes** | ☐ No - A confusion of the inhabitants (people leaving the house).

### Has it been observed

- ☒ **Yes** | ☐ No - Moving knick-knacks?  
☐ Yes | ☒ **No** - Moving light objects?

Which ones?:

- ☐ Yes | ☒ **No** - The falling of frames hanging on the wall?  
☐ Yes | ☒ **No** - The falling of light objects placed on polished furniture or marble  
☐ Yes | ☒ **No** - Cracked or broken windows?  
☐ Yes | ☒ **No** - Broken crockery?  
☒ **Yes** | ☐ No - Light objects (vases, flower pots, etc.) spilled?  
☐ Yes | ☒ **No** - Has light furniture moved?  
☐ Yes | ☒ **No** - Has heavy furniture (chests, stoves, ...) vibrated?  
☐ Yes | ☒ **No** - Did bells tinkle?  
☐ Yes | ☒ **No** - Did heavy furniture move?  
☐ Yes | ☒ **No** - Did light furniture tip over?  
☐ Yes | ☒ **No** - Have doors been moved on their hinges?

### Has it been observed

- ☐ Yes | ☒ **No** - Falling pieces of plaster from the ceilings?  
☐ Yes | ☒ **No** - Cracks in wall plaster?  
☐ Yes | ☒ **No** - An exceptional fall of a chimney in poor condition?  
☐ Yes | ☒ **No** - An exceptional fall of some bricks?  
☐ Yes | ☒ **No** - Have there been several damaged chimneys?

How many?:

- ☐ Yes | ☒ **No** - Have there been several chimneys overturned?

How many?:

% for the municipality?:

- ☐ Yes | ☒ **No** - Have there been any falls of façade ornaments?

How important?:

- ☐ Yes | ☒ **No** - Have there been deep cracks in the brick walls?  
☐ Yes | ☒ **No** - Have there been deep cracks in the concrete walls?  
☐ Yes | ☒ **No** - Have there been landslides along the banks or slopes?

Importance:

ADDITIONAL COMMENTS:

## Official inquiry for FLENU (BE)

Location: 50.449°N 3.888°E, at 2.5 km from the epicentre.

**Imin: 5 - Imax: 5**

### Did some residents perceive

- ☐ Yes | ☒ **No** - Light vibrations?  
☐ Yes | ☒ **No** - A characteristic noise: rumbling or rolling?

### Did many residents perceive

- ☐ Yes | ☒ **No** - A clear shaking of the building?  
☒ **Yes** | ☐ No - A loud rumble?

### Have we witnessed

- ☒ **Yes** | ☐ No - The oscillation of chandeliers or freely suspended objects?  
☒ **Yes** | ☐ No - Swinging chairs or beds?  
☒ **Yes** | ☐ No - Cracking ceilings?  
☒ **Yes** | ☐ No - Sleepers waking up?

### Has it been witnessed or later observed

- ☒ **Yes** | ☐ No - The shivering of windows and doors?  
☐ Yes | ☒ **No** - The shaking of movable objects (tables, vases, knick-knacks, ...)?

### Has it been witnessed or later observed

- ☐ Yes | ☒ **No** - The clattering of glasses and dishes in buffets?  
☐ Yes | ☒ **No** - The swaying of frames hanging on the wall?  
☐ Yes | ☒ **No** - The creaking of floors?  
☐ Yes | ☒ **No** - Small fragments of plaster falling from ceilings?  
☒ **Yes** | ☐ No - A confusion of the inhabitants (people leaving the house).

### Has it been observed

- ☐ Yes | ☒ **No** - Moving knick-knacks?  
☐ Yes | ☒ **No** - Moving light objects?  
 Which ones?:  
☐ Yes | ☒ **No** - The falling of frames hanging on the wall?  
☐ Yes | ☒ **No** - The falling of light objects placed on polished furniture or marble  
☐ Yes | ☒ **No** - Cracked or broken windows?  
☐ Yes | ☒ **No** - Broken crockery?  
☐ Yes | ☒ **No** - Light objects (vases, flower pots, etc.) spilled?  
☐ Yes | ☒ **No** - Has light furniture moved?  
☐ Yes | ☒ **No** - Has heavy furniture (chests, stoves, ...) vibrated?  
☐ Yes | ☒ **No** - Did bells tinkle?  
☐ Yes | ☒ **No** - Did heavy furniture move?  
☐ Yes | ☒ **No** - Did light furniture tip over?  
☐ Yes | ☒ **No** - Have doors been moved on their hinges?

### Has it been observed

- ☐ Yes | ☒ **No** - Falling pieces of plaster from the ceilings?  
☐ Yes | ☒ **No** - Cracks in wall plaster?  
☒ **Yes** | ☐ No - An exceptional fall of a chimney in poor condition?  
☐ Yes | ☒ **No** - An exceptional fall of some bricks?  
☐ Yes | ☒ **No** - Have there been several damaged chimneys?

How many?:

- ☐ Yes | ☒ **No** - Have there been several chimneys overturned?

How many?:

% for the municipality?:

- ☐ Yes | ☒ **No** - Have there been any falls of façade ornaments?

How important?:

- ☐ Yes | ☒ **No** - Have there been deep cracks in the brick walls?  
☐ Yes | ☒ **No** - Have there been deep cracks in the concrete walls?  
☐ Yes | ☒ **No** - Have there been landslides along the banks or slopes?

Importance:

ADDITIONAL COMMENTS: **le choc initial a été suivi de 3 ou 4 craquements.**

## Official inquiry for FRAMERIES (BE)

Location: 50.411°N 3.894°E, at 2.8 km from the epicentre.

**Imin: 3 - Imax: 4**

### Did some residents perceive

- ☐ Yes | ☒ **No** - Light vibrations?  
☐ Yes | ☒ **No** - A characteristic noise: rumbling or rolling?

### Did many residents perceive

- ☒ **Yes** | ☐ **No** - A clear shaking of the building?  
☐ Yes | ☒ **No** - A loud rumble?

### Have we witnessed

- ☒ **Yes** | ☐ **No** - The oscillation of chandeliers or freely suspended objects?  
☒ **Yes** | ☐ **No** - Swinging chairs or beds?  
☐ Yes | ☒ **No** - Cracking ceilings?  
☐ Yes | ☒ **No** - Sleepers waking up?

### Has it been witnessed or later observed

- ☐ Yes | ☒ **No** - The shivering of windows and doors?  
☐ Yes | ☒ **No** - The shaking of movable objects (tables, vases, knick-knacks, ...)?

### Has it been witnessed or later observed

- ☐ Yes | ☒ **No** - The clattering of glasses and dishes in buffets?  
☐ Yes | ☒ **No** - The swaying of frames hanging on the wall?  
☐ Yes | ☒ **No** - The creaking of floors?  
☐ Yes | ☒ **No** - Small fragments of plaster falling from ceilings?  
☐ Yes | ☒ **No** - A confusion of the inhabitants (people leaving the house).

### Has it been observed

- ☐ Yes | ☒ **No** - Moving knick-knacks?  
☐ Yes | ☒ **No** - Moving light objects?  
 Which ones?:  
☐ Yes | ☒ **No** - The falling of frames hanging on the wall?  
☐ Yes | ☒ **No** - The falling of light objects placed on polished furniture or marble  
☐ Yes | ☒ **No** - Cracked or broken windows?  
☐ Yes | ☒ **No** - Broken crockery?  
☐ Yes | ☒ **No** - Light objects (vases, flower pots, etc.) spilled?  
☐ Yes | ☒ **No** - Has light furniture moved?  
☐ Yes | ☒ **No** - Has heavy furniture (chests, stoves, ...) vibrated?  
☐ Yes | ☒ **No** - Did bells tinkle?  
☐ Yes | ☒ **No** - Did heavy furniture move?  
☐ Yes | ☒ **No** - Did light furniture tip over?  
☐ Yes | ☒ **No** - Have doors been moved on their hinges?

### Has it been observed

- ☐ Yes | ☒ **No** - Falling pieces of plaster from the ceilings?  
☐ Yes | ☒ **No** - Cracks in wall plaster?  
☐ Yes | ☒ **No** - An exceptional fall of a chimney in poor condition?  
☐ Yes | ☒ **No** - An exceptional fall of some bricks?  
☐ Yes | ☒ **No** - Have there been several damaged chimneys?

How many?:

- ☐ Yes | ☒ **No** - Have there been several chimneys overturned?

How many?:

% for the municipality?:

- ☐ Yes | ☒ **No** - Have there been any falls of façade ornaments?

How important?:

- ☐ Yes | ☒ **No** - Have there been deep cracks in the brick walls?  
☐ Yes | ☒ **No** - Have there been deep cracks in the concrete walls?  
☐ Yes | ☒ **No** - Have there been landslides along the banks or slopes?

Importance:

ADDITIONAL COMMENTS:

## Official inquiry for GENLY (BE)

Location: 50.393°N 3.919°E, at 5.4 km from the epicentre.

**Imin: 4 - Imax: 4**

### Did some residents perceive

- ☐ Yes | ☒ **No** - Light vibrations?  
☒ **Yes** | ☐ No - A characteristic noise: rumbling or rolling?

### Did many residents perceive

- ☒ **Yes** | ☐ No - A clear shaking of the building?  
☐ Yes | ☒ **No** - A loud rumble?

### Have we witnessed

- ☐ Yes | ☒ **No** - The oscillation of chandeliers or freely suspended objects?  
☒ **Yes** | ☐ No - Swinging chairs or beds?  
☐ Yes | ☒ **No** - Cracking ceilings?  
☒ **Yes** | ☐ No - Sleepers waking up?

### Has it been witnessed or later observed

- ☒ **Yes** | ☐ No - The shivering of windows and doors?  
☒ **Yes** | ☐ No - The shaking of movable objects (tables, vases, knick-knacks, ...)?

### Has it been witnessed or later observed

- ☐ Yes | ☒ **No** - The clattering of glasses and dishes in buffets?  
☐ Yes | ☒ **No** - The swaying of frames hanging on the wall?  
☐ Yes | ☒ **No** - The creaking of floors?  
☐ Yes | ☒ **No** - Small fragments of plaster falling from ceilings?  
☐ Yes | ☒ **No** - A confusion of the inhabitants (people leaving the house).

### Has it been observed

- ☐ Yes | ☒ **No** - Moving knick-knacks?  
☐ Yes | ☒ **No** - Moving light objects?  
 Which ones?:  
☐ Yes | ☒ **No** - The falling of frames hanging on the wall?  
☐ Yes | ☒ **No** - The falling of light objects placed on polished furniture or marble  
☐ Yes | ☒ **No** - Cracked or broken windows?  
☐ Yes | ☒ **No** - Broken crockery?  
☐ Yes | ☒ **No** - Light objects (vases, flower pots, etc.) spilled?  
☐ Yes | ☒ **No** - Has light furniture moved?  
☒ **Yes** | ☐ No - Has heavy furniture (chests, stoves, ...) vibrated?  
☐ Yes | ☒ **No** - Did bells tinkle?  
☐ Yes | ☒ **No** - Did heavy furniture move?  
☐ Yes | ☒ **No** - Did light furniture tip over?  
☐ Yes | ☒ **No** - Have doors been moved on their hinges?

### Has it been observed

- ☐ Yes | ☒ **No** - Falling pieces of plaster from the ceilings?  
☐ Yes | ☒ **No** - Cracks in wall plaster?  
☐ Yes | ☒ **No** - An exceptional fall of a chimney in poor condition?  
☐ Yes | ☒ **No** - An exceptional fall of some bricks?  
☐ Yes | ☒ **No** - Have there been several damaged chimneys?

How many?:

- ☐ Yes | ☒ **No** - Have there been several chimneys overturned?

How many?:

% for the municipality?:

- ☐ Yes | ☒ **No** - Have there been any falls of façade ornaments?

How important?:

- ☐ Yes | ☒ **No** - Have there been deep cracks in the brick walls?  
☐ Yes | ☒ **No** - Have there been deep cracks in the concrete walls?  
☐ Yes | ☒ **No** - Have there been landslides along the banks or slopes?

Importance:

ADDITIONAL COMMENTS:

## Official inquiry for GHLIN (BE)

Location: 50.478°N 3.902°E, at 5.8 km from the epicentre.

**Imin: 2 - Imax: 2**

### Did some residents perceive

- ☒ **Yes** | ☐ **No** - Light vibrations?  
☐ **Yes** | ☒ **No** - A characteristic noise: rumbling or rolling?

### Did many residents perceive

- ☐ **Yes** | ☒ **No** - A clear shaking of the building?  
☐ **Yes** | ☒ **No** - A loud rumble?

### Have we witnessed

- ☐ **Yes** | ☒ **No** - The oscillation of chandeliers or freely suspended objects?  
☐ **Yes** | ☒ **No** - Swinging chairs or beds?  
☐ **Yes** | ☒ **No** - Cracking ceilings?  
☐ **Yes** | ☒ **No** - Sleepers waking up?

### Has it been witnessed or later observed

- ☐ **Yes** | ☒ **No** - The shivering of windows and doors?  
☐ **Yes** | ☒ **No** - The shaking of movable objects (tables, vases, knick-knacks, ...)?

### Has it been witnessed or later observed

- ☐ **Yes** | ☒ **No** - The clattering of glasses and dishes in buffets?  
☐ **Yes** | ☒ **No** - The swaying of frames hanging on the wall?  
☐ **Yes** | ☒ **No** - The creaking of floors?  
☐ **Yes** | ☒ **No** - Small fragments of plaster falling from ceilings?  
☐ **Yes** | ☒ **No** - A confusion of the inhabitants (people leaving the house).

### Has it been observed

- ☐ **Yes** | ☒ **No** - Moving knick-knacks?  
☐ **Yes** | ☒ **No** - Moving light objects?  
 Which ones?:  
☐ **Yes** | ☒ **No** - The falling of frames hanging on the wall?  
☐ **Yes** | ☒ **No** - The falling of light objects placed on polished furniture or marble  
☐ **Yes** | ☒ **No** - Cracked or broken windows?  
☐ **Yes** | ☒ **No** - Broken crockery?  
☐ **Yes** | ☒ **No** - Light objects (vases, flower pots, etc.) spilled?  
☐ **Yes** | ☒ **No** - Has light furniture moved?  
☐ **Yes** | ☒ **No** - Has heavy furniture (chests, stoves, ...) vibrated?  
☐ **Yes** | ☒ **No** - Did bells tinkle?  
☐ **Yes** | ☒ **No** - Did heavy furniture move?  
☐ **Yes** | ☒ **No** - Did light furniture tip over?  
☐ **Yes** | ☒ **No** - Have doors been moved on their hinges?

### Has it been observed

- ☐ **Yes** | ☒ **No** - Falling pieces of plaster from the ceilings?  
☐ **Yes** | ☒ **No** - Cracks in wall plaster?  
☐ **Yes** | ☒ **No** - An exceptional fall of a chimney in poor condition?  
☐ **Yes** | ☒ **No** - An exceptional fall of some bricks?  
☐ **Yes** | ☒ **No** - Have there been several damaged chimneys?

How many?:

- ☐ **Yes** | ☒ **No** - Have there been several chimneys overturned?

How many?:

% for the municipality?:

- ☐ **Yes** | ☒ **No** - Have there been any falls of façade ornaments?

How important?:

- ☐ **Yes** | ☒ **No** - Have there been deep cracks in the brick walls?  
☐ **Yes** | ☒ **No** - Have there been deep cracks in the concrete walls?  
☐ **Yes** | ☒ **No** - Have there been landslides along the banks or slopes?

Importance:

ADDITIONAL COMMENTS:

## Official inquiry for GOTTIGNIES (BE)

Location: 50.479°N 4.061°E, at 14.6 km from the epicentre.

**Imin: 2 - Imax: 2**

### Did some residents perceive

- ☒ **Yes** | ☐ **No** - Light vibrations?  
☐ **Yes** | ☒ **No** - A characteristic noise: rumbling or rolling?

### Did many residents perceive

- ☐ **Yes** | ☒ **No** - A clear shaking of the building?  
☐ **Yes** | ☒ **No** - A loud rumble?

### Have we witnessed

- ☐ **Yes** | ☒ **No** - The oscillation of chandeliers or freely suspended objects?  
☐ **Yes** | ☒ **No** - Swinging chairs or beds?  
☐ **Yes** | ☒ **No** - Cracking ceilings?  
☐ **Yes** | ☒ **No** - Sleepers waking up?

### Has it been witnessed or later observed

- ☐ **Yes** | ☒ **No** - The shivering of windows and doors?  
☐ **Yes** | ☒ **No** - The shaking of movable objects (tables, vases, knick-knacks, ...)?

### Has it been witnessed or later observed

- ☐ **Yes** | ☒ **No** - The clattering of glasses and dishes in buffets?  
☐ **Yes** | ☒ **No** - The swaying of frames hanging on the wall?  
☐ **Yes** | ☒ **No** - The creaking of floors?  
☐ **Yes** | ☒ **No** - Small fragments of plaster falling from ceilings?  
☐ **Yes** | ☒ **No** - A confusion of the inhabitants (people leaving the house).

### Has it been observed

- ☐ **Yes** | ☒ **No** - Moving knick-knacks?  
☐ **Yes** | ☒ **No** - Moving light objects?  
 Which ones?:  
☐ **Yes** | ☒ **No** - The falling of frames hanging on the wall?  
☐ **Yes** | ☒ **No** - The falling of light objects placed on polished furniture or marble  
☐ **Yes** | ☒ **No** - Cracked or broken windows?  
☐ **Yes** | ☒ **No** - Broken crockery?  
☐ **Yes** | ☒ **No** - Light objects (vases, flower pots, etc.) spilled?  
☐ **Yes** | ☒ **No** - Has light furniture moved?  
☐ **Yes** | ☒ **No** - Has heavy furniture (chests, stoves, ...) vibrated?  
☐ **Yes** | ☒ **No** - Did bells tinkle?  
☐ **Yes** | ☒ **No** - Did heavy furniture move?  
☐ **Yes** | ☒ **No** - Did light furniture tip over?  
☐ **Yes** | ☒ **No** - Have doors been moved on their hinges?

### Has it been observed

- ☐ **Yes** | ☒ **No** - Falling pieces of plaster from the ceilings?  
☐ **Yes** | ☒ **No** - Cracks in wall plaster?  
☐ **Yes** | ☒ **No** - An exceptional fall of a chimney in poor condition?  
☐ **Yes** | ☒ **No** - An exceptional fall of some bricks?  
☐ **Yes** | ☒ **No** - Have there been several damaged chimneys?

How many?:

- ☐ **Yes** | ☒ **No** - Have there been several chimneys overturned?

How many?:

% for the municipality?:

- ☐ **Yes** | ☒ **No** - Have there been any falls of façade ornaments?

How important?:

- ☐ **Yes** | ☒ **No** - Have there been deep cracks in the brick walls?  
☐ **Yes** | ☒ **No** - Have there been deep cracks in the concrete walls?  
☐ **Yes** | ☒ **No** - Have there been landslides along the banks or slopes?

Importance:

ADDITIONAL COMMENTS:

## Official inquiry for HAININ (BE)

Location: 50.431°N 3.768°E, at 7.3 km from the epicentre.

**Imin: 4 - Imax: 4**

### Did some residents perceive

- ☐ Yes | ☒ **No** - Light vibrations?  
☒ **Yes** | ☐ No - A characteristic noise: rumbling or rolling?

### Did many residents perceive

- ☐ Yes | ☒ **No** - A clear shaking of the building?  
☒ **Yes** | ☐ No - A loud rumble?

### Have we witnessed

- ☒ **Yes** | ☐ No - The oscillation of chandeliers or freely suspended objects?  
☒ **Yes** | ☐ No - Swinging chairs or beds?  
☐ Yes | ☒ **No** - Cracking ceilings?  
☐ Yes | ☒ **No** - Sleepers waking up?

### Has it been witnessed or later observed

- ☐ Yes | ☒ **No** - The shivering of windows and doors?  
☒ **Yes** | ☐ No - The shaking of movable objects (tables, vases, knick-knacks, ...)?

### Has it been witnessed or later observed

- ☒ **Yes** | ☐ No - The clattering of glasses and dishes in buffets?  
☒ **Yes** | ☐ No - The swaying of frames hanging on the wall?  
☐ Yes | ☒ **No** - The creaking of floors?  
☐ Yes | ☒ **No** - Small fragments of plaster falling from ceilings?  
☐ Yes | ☒ **No** - A confusion of the inhabitants (people leaving the house).

### Has it been observed

- ☒ **Yes** | ☐ No - Moving knick-knacks?  
☐ Yes | ☒ **No** - Moving light objects?

Which ones?:

- ☐ Yes | ☒ **No** - The falling of frames hanging on the wall?  
☐ Yes | ☒ **No** - The falling of light objects placed on polished furniture or marble  
☐ Yes | ☒ **No** - Cracked or broken windows?  
☐ Yes | ☒ **No** - Broken crockery?  
☐ Yes | ☒ **No** - Light objects (vases, flower pots, etc.) spilled?  
☐ Yes | ☒ **No** - Has light furniture moved?  
☐ Yes | ☒ **No** - Has heavy furniture (chests, stoves, ...) vibrated?  
☐ Yes | ☒ **No** - Did bells tinkle?  
☐ Yes | ☒ **No** - Did heavy furniture move?  
☐ Yes | ☒ **No** - Did light furniture tip over?  
☐ Yes | ☒ **No** - Have doors been moved on their hinges?

### Has it been observed

- ☐ Yes | ☒ **No** - Falling pieces of plaster from the ceilings?  
☐ Yes | ☒ **No** - Cracks in wall plaster?  
☐ Yes | ☒ **No** - An exceptional fall of a chimney in poor condition?  
☐ Yes | ☒ **No** - An exceptional fall of some bricks?  
☐ Yes | ☒ **No** - Have there been several damaged chimneys?

How many?:

- ☐ Yes | ☒ **No** - Have there been several chimneys overturned?

How many?:

% for the municipality?:

- ☐ Yes | ☒ **No** - Have there been any falls of façade ornaments?

How important?:

- ☐ Yes | ☒ **No** - Have there been deep cracks in the brick walls?  
☐ Yes | ☒ **No** - Have there been deep cracks in the concrete walls?  
☐ Yes | ☒ **No** - Have there been landslides along the banks or slopes?

Importance:

ADDITIONAL COMMENTS:

## Official inquiry for HARCHIES (BE)

Location: 50.474°N 3.652°E, at 16.2 km from the epicentre.

**Imin: 3 - Imax: 3**

### Did some residents perceive

- ☒ **Yes** | ☐ No - Light vibrations?  
☒ **Yes** | ☐ No - A characteristic noise: rumbling or rolling?

### Did many residents perceive

- ☐ Yes | ☒ **No** - A clear shaking of the building?  
☐ Yes | ☒ **No** - A loud rumble?

### Have we witnessed

- ☐ Yes | ☒ **No** - The oscillation of chandeliers or freely suspended objects?  
☐ Yes | ☒ **No** - Swinging chairs or beds?  
☐ Yes | ☒ **No** - Cracking ceilings?  
☐ Yes | ☒ **No** - Sleepers waking up?

### Has it been witnessed or later observed

- ☐ Yes | ☒ **No** - The shivering of windows and doors?  
☐ Yes | ☒ **No** - The shaking of movable objects (tables, vases, knick-knacks, ...)?

### Has it been witnessed or later observed

- ☐ Yes | ☒ **No** - The clattering of glasses and dishes in buffets?  
☐ Yes | ☒ **No** - The swaying of frames hanging on the wall?  
☐ Yes | ☒ **No** - The creaking of floors?  
☐ Yes | ☒ **No** - Small fragments of plaster falling from ceilings?  
☐ Yes | ☒ **No** - A confusion of the inhabitants (people leaving the house).

### Has it been observed

- ☐ Yes | ☒ **No** - Moving knick-knacks?  
☐ Yes | ☒ **No** - Moving light objects?  
 Which ones?:  
☐ Yes | ☒ **No** - The falling of frames hanging on the wall?  
☐ Yes | ☒ **No** - The falling of light objects placed on polished furniture or marble  
☐ Yes | ☒ **No** - Cracked or broken windows?  
☐ Yes | ☒ **No** - Broken crockery?  
☐ Yes | ☒ **No** - Light objects (vases, flower pots, etc.) spilled?  
☐ Yes | ☒ **No** - Has light furniture moved?  
☐ Yes | ☒ **No** - Has heavy furniture (chests, stoves, ...) vibrated?  
☐ Yes | ☒ **No** - Did bells tinkle?  
☐ Yes | ☒ **No** - Did heavy furniture move?  
☐ Yes | ☒ **No** - Did light furniture tip over?  
☐ Yes | ☒ **No** - Have doors been moved on their hinges?

### Has it been observed

- ☐ Yes | ☒ **No** - Falling pieces of plaster from the ceilings?  
☐ Yes | ☒ **No** - Cracks in wall plaster?  
☐ Yes | ☒ **No** - An exceptional fall of a chimney in poor condition?  
☐ Yes | ☒ **No** - An exceptional fall of some bricks?  
☐ Yes | ☒ **No** - Have there been several damaged chimneys?

How many?:

- ☐ Yes | ☒ **No** - Have there been several chimneys overturned?

How many?:

% for the municipality?:

- ☐ Yes | ☒ **No** - Have there been any falls of façade ornaments?

How important?:

- ☐ Yes | ☒ **No** - Have there been deep cracks in the brick walls?  
☐ Yes | ☒ **No** - Have there been deep cracks in the concrete walls?  
☐ Yes | ☒ **No** - Have there been landslides along the banks or slopes?

Importance:

ADDITIONAL COMMENTS:

## Official inquiry for HARVENG (BE)

Location: 50.396°N 3.988°E, at 9.2 km from the epicentre.

**Imin: 3 - Imax: 3**

### Did some residents perceive

- ☐ Yes | ☒ **No** - Light vibrations?  
☐ Yes | ☒ **No** - A characteristic noise: rumbling or rolling?

### Did many residents perceive

- ☒ **Yes** | ☐ No - A clear shaking of the building?  
☒ **Yes** | ☐ No - A loud rumble?

### Have we witnessed

- ☐ Yes | ☒ **No** - The oscillation of chandeliers or freely suspended objects?  
☐ Yes | ☒ **No** - Swinging chairs or beds?  
☐ Yes | ☒ **No** - Cracking ceilings?  
☐ Yes | ☒ **No** - Sleepers waking up?

### Has it been witnessed or later observed

- ☐ Yes | ☒ **No** - The shivering of windows and doors?  
☐ Yes | ☒ **No** - The shaking of movable objects (tables, vases, knick-knacks, ...)?

### Has it been witnessed or later observed

- ☐ Yes | ☒ **No** - The clattering of glasses and dishes in buffets?  
☐ Yes | ☒ **No** - The swaying of frames hanging on the wall?  
☐ Yes | ☒ **No** - The creaking of floors?  
☐ Yes | ☒ **No** - Small fragments of plaster falling from ceilings?  
☐ Yes | ☒ **No** - A confusion of the inhabitants (people leaving the house).

### Has it been observed

- ☐ Yes | ☒ **No** - Moving knick-knacks?  
☐ Yes | ☒ **No** - Moving light objects?

Which ones?:

- ☐ Yes | ☒ **No** - The falling of frames hanging on the wall?  
☐ Yes | ☒ **No** - The falling of light objects placed on polished furniture or marble  
☐ Yes | ☒ **No** - Cracked or broken windows?  
☐ Yes | ☒ **No** - Broken crockery?  
☐ Yes | ☒ **No** - Light objects (vases, flower pots, etc.) spilled?  
☐ Yes | ☒ **No** - Has light furniture moved?  
☐ Yes | ☒ **No** - Has heavy furniture (chests, stoves, ...) vibrated?  
☐ Yes | ☒ **No** - Did bells tinkle?  
☐ Yes | ☒ **No** - Did heavy furniture move?  
☐ Yes | ☒ **No** - Did light furniture tip over?  
☐ Yes | ☒ **No** - Have doors been moved on their hinges?

### Has it been observed

- ☐ Yes | ☒ **No** - Falling pieces of plaster from the ceilings?  
☐ Yes | ☒ **No** - Cracks in wall plaster?  
☐ Yes | ☒ **No** - An exceptional fall of a chimney in poor condition?  
☐ Yes | ☒ **No** - An exceptional fall of some bricks?  
☐ Yes | ☒ **No** - Have there been several damaged chimneys?

How many?:

- ☐ Yes | ☒ **No** - Have there been several chimneys overturned?

How many?:

% for the municipality?:

- ☐ Yes | ☒ **No** - Have there been any falls of façade ornaments?

How important?:

- ☐ Yes | ☒ **No** - Have there been deep cracks in the brick walls?  
☐ Yes | ☒ **No** - Have there been deep cracks in the concrete walls?  
☐ Yes | ☒ **No** - Have there been landslides along the banks or slopes?

Importance:

ADDITIONAL COMMENTS:

## Official inquiry for HAUTRAGE (BE)

Location: 50.482°N 3.765°E, at 9.5 km from the epicentre.

**Imin: 2 - Imax: 2**

### Did some residents perceive

- ☒ **Yes** | ☐ **No** - Light vibrations?  
☐ **Yes** | ☒ **No** - A characteristic noise: rumbling or rolling?

### Did many residents perceive

- ☐ **Yes** | ☒ **No** - A clear shaking of the building?  
☐ **Yes** | ☒ **No** - A loud rumble?

### Have we witnessed

- ☐ **Yes** | ☒ **No** - The oscillation of chandeliers or freely suspended objects?  
☐ **Yes** | ☒ **No** - Swinging chairs or beds?  
☐ **Yes** | ☒ **No** - Cracking ceilings?  
☐ **Yes** | ☒ **No** - Sleepers waking up?

### Has it been witnessed or later observed

- ☐ **Yes** | ☒ **No** - The shivering of windows and doors?  
☐ **Yes** | ☒ **No** - The shaking of movable objects (tables, vases, knick-knacks, ...)?

### Has it been witnessed or later observed

- ☐ **Yes** | ☒ **No** - The clattering of glasses and dishes in buffets?  
☐ **Yes** | ☒ **No** - The swaying of frames hanging on the wall?  
☐ **Yes** | ☒ **No** - The creaking of floors?  
☐ **Yes** | ☒ **No** - Small fragments of plaster falling from ceilings?  
☐ **Yes** | ☒ **No** - A confusion of the inhabitants (people leaving the house).

### Has it been observed

- ☐ **Yes** | ☒ **No** - Moving knick-knacks?  
☐ **Yes** | ☒ **No** - Moving light objects?  
 Which ones?:  
☐ **Yes** | ☒ **No** - The falling of frames hanging on the wall?  
☐ **Yes** | ☒ **No** - The falling of light objects placed on polished furniture or marble  
☐ **Yes** | ☒ **No** - Cracked or broken windows?  
☐ **Yes** | ☒ **No** - Broken crockery?  
☐ **Yes** | ☒ **No** - Light objects (vases, flower pots, etc.) spilled?  
☐ **Yes** | ☒ **No** - Has light furniture moved?  
☐ **Yes** | ☒ **No** - Has heavy furniture (chests, stoves, ...) vibrated?  
☐ **Yes** | ☒ **No** - Did bells tinkle?  
☐ **Yes** | ☒ **No** - Did heavy furniture move?  
☐ **Yes** | ☒ **No** - Did light furniture tip over?  
☐ **Yes** | ☒ **No** - Have doors been moved on their hinges?

### Has it been observed

- ☐ **Yes** | ☒ **No** - Falling pieces of plaster from the ceilings?  
☐ **Yes** | ☒ **No** - Cracks in wall plaster?  
☐ **Yes** | ☒ **No** - An exceptional fall of a chimney in poor condition?  
☐ **Yes** | ☒ **No** - An exceptional fall of some bricks?  
☐ **Yes** | ☒ **No** - Have there been several damaged chimneys?

How many?:

- ☐ **Yes** | ☒ **No** - Have there been several chimneys overturned?

How many?:

% for the municipality?:

- ☐ **Yes** | ☒ **No** - Have there been any falls of façade ornaments?

How important?:

- ☐ **Yes** | ☒ **No** - Have there been deep cracks in the brick walls?  
☐ **Yes** | ☒ **No** - Have there been deep cracks in the concrete walls?  
☐ **Yes** | ☒ **No** - Have there been landslides along the banks or slopes?

Importance:

ADDITIONAL COMMENTS:

## Official inquiry for HAVRE (BE)

Location: 50.466°N 4.047°E, at 13.2 km from the epicentre.

**Imin: 2 - Imax: 2**

### Did some residents perceive

☒ **Yes** | ☐ **No** - Light vibrations?

☒ **Yes** | ☐ **No** - A characteristic noise: rumbling or rolling?

### Did many residents perceive

☐ **Yes** | ☒ **No** - A clear shaking of the building?

☐ **Yes** | ☒ **No** - A loud rumble?

### Have we witnessed

☐ **Yes** | ☒ **No** - The oscillation of chandeliers or freely suspended objects?

☐ **Yes** | ☒ **No** - Swinging chairs or beds?

☐ **Yes** | ☒ **No** - Cracking ceilings?

☐ **Yes** | ☒ **No** - Sleepers waking up?

### Has it been witnessed or later observed

☐ **Yes** | ☒ **No** - The shivering of windows and doors?

☐ **Yes** | ☒ **No** - The shaking of movable objects (tables, vases, knick-knacks, ...)?

### Has it been witnessed or later observed

☐ **Yes** | ☒ **No** - The clattering of glasses and dishes in buffets?

☐ **Yes** | ☒ **No** - The swaying of frames hanging on the wall?

☐ **Yes** | ☒ **No** - The creaking of floors?

☐ **Yes** | ☒ **No** - Small fragments of plaster falling from ceilings?

☐ **Yes** | ☒ **No** - A confusion of the inhabitants (people leaving the house).

### Has it been observed

☐ **Yes** | ☒ **No** - Moving knick-knacks?

☐ **Yes** | ☒ **No** - Moving light objects?

Which ones?:

☐ **Yes** | ☒ **No** - The falling of frames hanging on the wall?

☐ **Yes** | ☒ **No** - The falling of light objects placed on polished furniture or marble

☐ **Yes** | ☒ **No** - Cracked or broken windows?

☐ **Yes** | ☒ **No** - Broken crockery?

☐ **Yes** | ☒ **No** - Light objects (vases, flower pots, etc.) spilled?

☐ **Yes** | ☒ **No** - Has light furniture moved?

☐ **Yes** | ☒ **No** - Has heavy furniture (chests, stoves, ...) vibrated?

☐ **Yes** | ☒ **No** - Did bells tinkle?

☐ **Yes** | ☒ **No** - Did heavy furniture move?

☐ **Yes** | ☒ **No** - Did light furniture tip over?

☐ **Yes** | ☒ **No** - Have doors been moved on their hinges?

### Has it been observed

☐ **Yes** | ☒ **No** - Falling pieces of plaster from the ceilings?

☐ **Yes** | ☒ **No** - Cracks in wall plaster?

☐ **Yes** | ☒ **No** - An exceptional fall of a chimney in poor condition?

☐ **Yes** | ☒ **No** - An exceptional fall of some bricks?

☐ **Yes** | ☒ **No** - Have there been several damaged chimneys?

How many?:

☐ **Yes** | ☒ **No** - Have there been several chimneys overturned?

How many?:

% for the municipality?:

☐ **Yes** | ☒ **No** - Have there been any falls of façade ornaments?

How important?:

☐ **Yes** | ☒ **No** - Have there been deep cracks in the brick walls?

☐ **Yes** | ☒ **No** - Have there been deep cracks in the concrete walls?

☐ **Yes** | ☒ **No** - Have there been landslides along the banks or slopes?

Importance:

ADDITIONAL COMMENTS:

## Official inquiry for HERCHIES (BE)

Location: 50.529°N 3.858°E, at 11.1 km from the epicentre.

**Imin: 2 - Imax: 2**

### Did some residents perceive

- ☒ **Yes** | ☐ No - Light vibrations?  
☐ Yes | ☒ **No** - A characteristic noise: rumbling or rolling?

### Did many residents perceive

- ☐ Yes | ☒ **No** - A clear shaking of the building?  
☐ Yes | ☒ **No** - A loud rumble?

### Have we witnessed

- ☐ Yes | ☒ **No** - The oscillation of chandeliers or freely suspended objects?  
☒ **Yes** | ☐ No - Swinging chairs or beds?  
☐ Yes | ☒ **No** - Cracking ceilings?  
☐ Yes | ☒ **No** - Sleepers waking up?

### Has it been witnessed or later observed

- ☐ Yes | ☒ **No** - The shivering of windows and doors?  
☐ Yes | ☒ **No** - The shaking of movable objects (tables, vases, knick-knacks, ...)?

### Has it been witnessed or later observed

- ☐ Yes | ☒ **No** - The clattering of glasses and dishes in buffets?  
☐ Yes | ☒ **No** - The swaying of frames hanging on the wall?  
☐ Yes | ☒ **No** - The creaking of floors?  
☐ Yes | ☒ **No** - Small fragments of plaster falling from ceilings?  
☐ Yes | ☒ **No** - A confusion of the inhabitants (people leaving the house).

### Has it been observed

- ☐ Yes | ☒ **No** - Moving knick-knacks?  
☐ Yes | ☒ **No** - Moving light objects?  
 Which ones?:  
☐ Yes | ☒ **No** - The falling of frames hanging on the wall?  
☐ Yes | ☒ **No** - The falling of light objects placed on polished furniture or marble  
☐ Yes | ☒ **No** - Cracked or broken windows?  
☐ Yes | ☒ **No** - Broken crockery?  
☐ Yes | ☒ **No** - Light objects (vases, flower pots, etc.) spilled?  
☐ Yes | ☒ **No** - Has light furniture moved?  
☐ Yes | ☒ **No** - Has heavy furniture (chests, stoves, ...) vibrated?  
☐ Yes | ☒ **No** - Did bells tinkle?  
☐ Yes | ☒ **No** - Did heavy furniture move?  
☐ Yes | ☒ **No** - Did light furniture tip over?  
☐ Yes | ☒ **No** - Have doors been moved on their hinges?

### Has it been observed

- ☐ Yes | ☒ **No** - Falling pieces of plaster from the ceilings?  
☐ Yes | ☒ **No** - Cracks in wall plaster?  
☐ Yes | ☒ **No** - An exceptional fall of a chimney in poor condition?  
☐ Yes | ☒ **No** - An exceptional fall of some bricks?  
☐ Yes | ☒ **No** - Have there been several damaged chimneys?

How many?:

- ☐ Yes | ☒ **No** - Have there been several chimneys overturned?

How many?:

% for the municipality?:

- ☐ Yes | ☒ **No** - Have there been any falls of façade ornaments?

How important?:

- ☐ Yes | ☒ **No** - Have there been deep cracks in the brick walls?  
☐ Yes | ☒ **No** - Have there been deep cracks in the concrete walls?  
☐ Yes | ☒ **No** - Have there been landslides along the banks or slopes?

Importance:

ADDITIONAL COMMENTS:

## Official inquiry for HORNU (BE)

Location: 50.434°N 3.829°E, at 2.9 km from the epicentre.

**Imin: 5 - Imax: 5**

### Did some residents perceive

- ☐ Yes | ☒ **No** - Light vibrations?  
☒ **Yes** | ☐ No - A characteristic noise: rumbling or rolling?

### Did many residents perceive

- ☐ Yes | ☒ **No** - A clear shaking of the building?  
☒ **Yes** | ☐ No - A loud rumble?

### Have we witnessed

- ☐ Yes | ☒ **No** - The oscillation of chandeliers or freely suspended objects?  
☒ **Yes** | ☐ No - Swinging chairs or beds?  
☒ **Yes** | ☐ No - Cracking ceilings?  
☒ **Yes** | ☐ No - Sleepers waking up?

### Has it been witnessed or later observed

- ☒ **Yes** | ☐ No - The shivering of windows and doors?  
☒ **Yes** | ☐ No - The shaking of movable objects (tables, vases, knick-knacks, ...)?

### Has it been witnessed or later observed

- ☐ Yes | ☒ **No** - The clattering of glasses and dishes in buffets?  
☒ **Yes** | ☐ No - The swaying of frames hanging on the wall?  
☒ **Yes** | ☐ No - The creaking of floors?  
☐ Yes | ☒ **No** - Small fragments of plaster falling from ceilings?  
☒ **Yes** | ☐ No - A confusion of the inhabitants (people leaving the house).

### Has it been observed

- ☐ Yes | ☒ **No** - Moving knick-knacks?  
☐ Yes | ☒ **No** - Moving light objects?  
 Which ones?:  
☐ Yes | ☒ **No** - The falling of frames hanging on the wall?  
☐ Yes | ☒ **No** - The falling of light objects placed on polished furniture or marble  
☐ Yes | ☒ **No** - Cracked or broken windows?  
☐ Yes | ☒ **No** - Broken crockery?  
☐ Yes | ☒ **No** - Light objects (vases, flower pots, etc.) spilled?  
☐ Yes | ☒ **No** - Has light furniture moved?  
☒ **Yes** | ☐ No - Has heavy furniture (chests, stoves, ...) vibrated?  
☒ **Yes** | ☐ No - Did bells tinkle?  
☐ Yes | ☒ **No** - Did heavy furniture move?  
☐ Yes | ☒ **No** - Did light furniture tip over?  
☐ Yes | ☒ **No** - Have doors been moved on their hinges?

### Has it been observed

- ☐ Yes | ☒ **No** - Falling pieces of plaster from the ceilings?  
☐ Yes | ☒ **No** - Cracks in wall plaster?  
☒ **Yes** | ☐ No - An exceptional fall of a chimney in poor condition?  
☐ Yes | ☒ **No** - An exceptional fall of some bricks?  
☐ Yes | ☒ **No** - Have there been several damaged chimneys?

How many?:

- ☐ Yes | ☒ **No** - Have there been several chimneys overturned?

How many?:

% for the municipality?:

- ☐ Yes | ☒ **No** - Have there been any falls of façade ornaments?

How important?:

- ☐ Yes | ☒ **No** - Have there been deep cracks in the brick walls?  
☐ Yes | ☒ **No** - Have there been deep cracks in the concrete walls?  
☐ Yes | ☒ **No** - Have there been landslides along the banks or slopes?

Importance:

ADDITIONAL COMMENTS:

## Official inquiry for HYON (BE)

Location: 50.441°N 3.966°E, at 7.0 km from the epicentre.

**Imin: 3 - Imax: 4**

### Did some residents perceive

- ☐ Yes | ☒ **No** - Light vibrations?  
☒ **Yes** | ☐ No - A characteristic noise: rumbling or rolling?

### Did many residents perceive

- ☒ **Yes** | ☐ No - A clear shaking of the building?  
☐ Yes | ☒ **No** - A loud rumble?

### Have we witnessed

- ☐ Yes | ☒ **No** - The oscillation of chandeliers or freely suspended objects?  
☒ **Yes** | ☐ No - Swinging chairs or beds?  
☐ Yes | ☒ **No** - Cracking ceilings?  
☐ Yes | ☒ **No** - Sleepers waking up?

### Has it been witnessed or later observed

- ☐ Yes | ☒ **No** - The shivering of windows and doors?  
☒ **Yes** | ☐ No - The shaking of movable objects (tables, vases, knick-knacks, ...)?

### Has it been witnessed or later observed

- ☐ Yes | ☒ **No** - The clattering of glasses and dishes in buffets?  
☐ Yes | ☒ **No** - The swaying of frames hanging on the wall?  
☐ Yes | ☒ **No** - The creaking of floors?  
☐ Yes | ☒ **No** - Small fragments of plaster falling from ceilings?  
☐ Yes | ☒ **No** - A confusion of the inhabitants (people leaving the house).

### Has it been observed

- ☐ Yes | ☒ **No** - Moving knick-knacks?  
☐ Yes | ☒ **No** - Moving light objects?  
 Which ones?:  
☐ Yes | ☒ **No** - The falling of frames hanging on the wall?  
☐ Yes | ☒ **No** - The falling of light objects placed on polished furniture or marble  
☐ Yes | ☒ **No** - Cracked or broken windows?  
☐ Yes | ☒ **No** - Broken crockery?  
☐ Yes | ☒ **No** - Light objects (vases, flower pots, etc.) spilled?  
☐ Yes | ☒ **No** - Has light furniture moved?  
☐ Yes | ☒ **No** - Has heavy furniture (chests, stoves, ...) vibrated?  
☐ Yes | ☒ **No** - Did bells tinkle?  
☐ Yes | ☒ **No** - Did heavy furniture move?  
☐ Yes | ☒ **No** - Did light furniture tip over?  
☐ Yes | ☒ **No** - Have doors been moved on their hinges?

### Has it been observed

- ☐ Yes | ☒ **No** - Falling pieces of plaster from the ceilings?  
☐ Yes | ☒ **No** - Cracks in wall plaster?  
☐ Yes | ☒ **No** - An exceptional fall of a chimney in poor condition?  
☐ Yes | ☒ **No** - An exceptional fall of some bricks?  
☐ Yes | ☒ **No** - Have there been several damaged chimneys?

How many?:

- ☐ Yes | ☒ **No** - Have there been several chimneys overturned?

How many?:

% for the municipality?:

- ☐ Yes | ☒ **No** - Have there been any falls of façade ornaments?

How important?:

- ☐ Yes | ☒ **No** - Have there been deep cracks in the brick walls?  
☐ Yes | ☒ **No** - Have there been deep cracks in the concrete walls?  
☐ Yes | ☒ **No** - Have there been landslides along the banks or slopes?

Importance:

ADDITIONAL COMMENTS:

## Official inquiry for JEMAPPES (BE)

Location: 50.449°N 3.888°E, at 2.5 km from the epicentre.

**Imin: 5 - Imax: 5**

### Did some residents perceive

- ☐ Yes | ☒ **No** - Light vibrations?  
☒ **Yes** | ☐ No - A characteristic noise: rumbling or rolling?

### Did many residents perceive

- ☐ Yes | ☒ **No** - A clear shaking of the building?  
☐ Yes | ☒ **No** - A loud rumble?

### Have we witnessed

- ☐ Yes | ☒ **No** - The oscillation of chandeliers or freely suspended objects?  
☐ Yes | ☒ **No** - Swinging chairs or beds?  
☐ Yes | ☒ **No** - Cracking ceilings?  
☒ **Yes** | ☐ No - Sleepers waking up?

### Has it been witnessed or later observed

- ☐ Yes | ☒ **No** - The shivering of windows and doors?  
☒ **Yes** | ☐ No - The shaking of movable objects (tables, vases, knick-knacks, ...)?

### Has it been witnessed or later observed

- ☒ **Yes** | ☐ No - The clattering of glasses and dishes in buffets?  
☐ Yes | ☒ **No** - The swaying of frames hanging on the wall?  
☐ Yes | ☒ **No** - The creaking of floors?  
☐ Yes | ☒ **No** - Small fragments of plaster falling from ceilings?  
☐ Yes | ☒ **No** - A confusion of the inhabitants (people leaving the house).

### Has it been observed

- ☐ Yes | ☒ **No** - Moving knick-knacks?  
☐ Yes | ☒ **No** - Moving light objects?  
 Which ones?:  
☐ Yes | ☒ **No** - The falling of frames hanging on the wall?  
☐ Yes | ☒ **No** - The falling of light objects placed on polished furniture or marble  
☐ Yes | ☒ **No** - Cracked or broken windows?  
☐ Yes | ☒ **No** - Broken crockery?  
☐ Yes | ☒ **No** - Light objects (vases, flower pots, etc.) spilled?  
☐ Yes | ☒ **No** - Has light furniture moved?  
☐ Yes | ☒ **No** - Has heavy furniture (chests, stoves, ...) vibrated?  
☐ Yes | ☒ **No** - Did bells tinkle?  
☐ Yes | ☒ **No** - Did heavy furniture move?  
☐ Yes | ☒ **No** - Did light furniture tip over?  
☐ Yes | ☒ **No** - Have doors been moved on their hinges?

### Has it been observed

- ☐ Yes | ☒ **No** - Falling pieces of plaster from the ceilings?  
☐ Yes | ☒ **No** - Cracks in wall plaster?  
☐ Yes | ☒ **No** - An exceptional fall of a chimney in poor condition?  
☒ **Yes** | ☐ No - An exceptional fall of some bricks?  
☒ **Yes** | ☐ No - Have there been several damaged chimneys?

How many?: **2.0**

- ☐ Yes | ☒ **No** - Have there been several chimneys overturned?

How many?:

% for the municipality?:

- ☐ Yes | ☒ **No** - Have there been any falls of façade ornaments?

How important?:

- ☐ Yes | ☒ **No** - Have there been deep cracks in the brick walls?  
☐ Yes | ☒ **No** - Have there been deep cracks in the concrete walls?  
☐ Yes | ☒ **No** - Have there been landslides along the banks or slopes?

Importance:

ADDITIONAL COMMENTS: **Une forte secousse a été ressentie en tous les points de la commune le lundi 27 octobre 1952, vers 7H10. Cette secousse était plus forte que celles ressenties le 21 et 22 courant et représentait le bruit caractéristique d'un fort grondement avec roulement. Une seconde secousse plus faible a été ressentie vers 7H39, présentant le bruit d'un grondement.**

## Official inquiry for LA BOUVERIE (BE)

Location: 50.405°N 3.876°E, at 2.8 km from the epicentre.

**Imin: 5 - Imax: 5**

### Did some residents perceive

- ☐ Yes | ☒ **No** - Light vibrations?  
☐ Yes | ☒ **No** - A characteristic noise: rumbling or rolling?

### Did many residents perceive

- ☒ **Yes** | ☐ No - A clear shaking of the building?  
☒ **Yes** | ☐ No - A loud rumble?

### Have we witnessed

- ☒ **Yes** | ☐ No - The oscillation of chandeliers or freely suspended objects?  
☒ **Yes** | ☐ No - Swinging chairs or beds?  
☐ Yes | ☒ **No** - Cracking ceilings?  
☒ **Yes** | ☐ No - Sleepers waking up?

### Has it been witnessed or later observed

- ☒ **Yes** | ☐ No - The shivering of windows and doors?  
☒ **Yes** | ☐ No - The shaking of movable objects (tables, vases, knick-knacks, ...)?

### Has it been witnessed or later observed

- ☒ **Yes** | ☐ No - The clattering of glasses and dishes in buffets?  
☐ Yes | ☒ **No** - The swaying of frames hanging on the wall?  
☒ **Yes** | ☐ No - The creaking of floors?  
☒ **Yes** | ☐ No - Small fragments of plaster falling from ceilings?  
☒ **Yes** | ☐ No - A confusion of the inhabitants (people leaving the house).

### Has it been observed

- ☒ **Yes** | ☐ No - Moving knick-knacks?  
☒ **Yes** | ☐ No - Moving light objects?  
 Which ones?:  
☐ Yes | ☒ **No** - The falling of frames hanging on the wall?  
☐ Yes | ☒ **No** - The falling of light objects placed on polished furniture or marble  
☐ Yes | ☒ **No** - Cracked or broken windows?  
☐ Yes | ☒ **No** - Broken crockery?  
☐ Yes | ☒ **No** - Light objects (vases, flower pots, etc.) spilled?  
☐ Yes | ☒ **No** - Has light furniture moved?  
☒ **Yes** | ☐ No - Has heavy furniture (chests, stoves, ...) vibrated?  
☐ Yes | ☒ **No** - Did bells tinkle?  
☐ Yes | ☒ **No** - Did heavy furniture move?  
☐ Yes | ☒ **No** - Did light furniture tip over?  
☐ Yes | ☒ **No** - Have doors been moved on their hinges?

### Has it been observed

- ☒ **Yes** | ☐ No - Falling pieces of plaster from the ceilings?  
☐ Yes | ☒ **No** - Cracks in wall plaster?  
☐ Yes | ☒ **No** - An exceptional fall of a chimney in poor condition?  
☒ **Yes** | ☐ No - An exceptional fall of some bricks?  
☐ Yes | ☒ **No** - Have there been several damaged chimneys?

How many?:

- ☐ Yes | ☒ **No** - Have there been several chimneys overturned?

How many?:

% for the municipality?:

- ☐ Yes | ☒ **No** - Have there been any falls of façade ornaments?

How important?:

- ☐ Yes | ☒ **No** - Have there been deep cracks in the brick walls?  
☐ Yes | ☒ **No** - Have there been deep cracks in the concrete walls?  
☐ Yes | ☒ **No** - Have there been landslides along the banks or slopes?

Importance:

ADDITIONAL COMMENTS:

## Official inquiry for NIMY (BE)

Location: 50.473°N 3.959°E, at 8.0 km from the epicentre.

**Imin: 4 - Imax: 4**

### Did some residents perceive

- ☐ Yes | ☒ **No** - Light vibrations?  
☐ Yes | ☒ **No** - A characteristic noise: rumbling or rolling?

### Did many residents perceive

- ☐ Yes | ☒ **No** - A clear shaking of the building?  
☒ **Yes** | ☐ No - A loud rumble?

### Have we witnessed

- ☐ Yes | ☒ **No** - The oscillation of chandeliers or freely suspended objects?  
☒ **Yes** | ☐ No - Swinging chairs or beds?  
☐ Yes | ☒ **No** - Cracking ceilings?  
☐ Yes | ☒ **No** - Sleepers waking up?

### Has it been witnessed or later observed

- ☒ **Yes** | ☐ No - The shivering of windows and doors?  
☒ **Yes** | ☐ No - The shaking of movable objects (tables, vases, knick-knacks, ...)?

### Has it been witnessed or later observed

- ☐ Yes | ☒ **No** - The clattering of glasses and dishes in buffets?  
☐ Yes | ☒ **No** - The swaying of frames hanging on the wall?  
☐ Yes | ☒ **No** - The creaking of floors?  
☐ Yes | ☒ **No** - Small fragments of plaster falling from ceilings?  
☐ Yes | ☒ **No** - A confusion of the inhabitants (people leaving the house).

### Has it been observed

- ☐ Yes | ☒ **No** - Moving knick-knacks?  
☐ Yes | ☒ **No** - Moving light objects?  
 Which ones?:  
☐ Yes | ☒ **No** - The falling of frames hanging on the wall?  
☐ Yes | ☒ **No** - The falling of light objects placed on polished furniture or marble  
☐ Yes | ☒ **No** - Cracked or broken windows?  
☐ Yes | ☒ **No** - Broken crockery?  
☐ Yes | ☒ **No** - Light objects (vases, flower pots, etc.) spilled?  
☐ Yes | ☒ **No** - Has light furniture moved?  
☐ Yes | ☒ **No** - Has heavy furniture (chests, stoves, ...) vibrated?  
☐ Yes | ☒ **No** - Did bells tinkle?  
☐ Yes | ☒ **No** - Did heavy furniture move?  
☐ Yes | ☒ **No** - Did light furniture tip over?  
☐ Yes | ☒ **No** - Have doors been moved on their hinges?

### Has it been observed

- ☐ Yes | ☒ **No** - Falling pieces of plaster from the ceilings?  
☐ Yes | ☒ **No** - Cracks in wall plaster?  
☐ Yes | ☒ **No** - An exceptional fall of a chimney in poor condition?  
☐ Yes | ☒ **No** - An exceptional fall of some bricks?  
☐ Yes | ☒ **No** - Have there been several damaged chimneys?

How many?:

- ☐ Yes | ☒ **No** - Have there been several chimneys overturned?

How many?:

% for the municipality?:

- ☐ Yes | ☒ **No** - Have there been any falls of façade ornaments?

How important?:

- ☐ Yes | ☒ **No** - Have there been deep cracks in the brick walls?  
☐ Yes | ☒ **No** - Have there been deep cracks in the concrete walls?  
☐ Yes | ☒ **No** - Have there been landslides along the banks or slopes?

Importance:

ADDITIONAL COMMENTS:

## Official inquiry for NOIRCHAIN (BE)

Location: 50.402°N 3.933°E, at 5.5 km from the epicentre.

**Imin: 4 - Imax: 4**

### Did some residents perceive

- ☒ **Yes** | ☐ No - Light vibrations?  
☒ **Yes** | ☐ No - A characteristic noise: rumbling or rolling?

### Did many residents perceive

- ☐ Yes | ☒ **No** - A clear shaking of the building?  
☒ **Yes** | ☐ No - A loud rumble?

### Have we witnessed

- ☐ Yes | ☒ **No** - The oscillation of chandeliers or freely suspended objects?  
☐ Yes | ☒ **No** - Swinging chairs or beds?  
☐ Yes | ☒ **No** - Cracking ceilings?  
☒ **Yes** | ☐ No - Sleepers waking up?

### Has it been witnessed or later observed

- ☒ **Yes** | ☐ No - The shivering of windows and doors?  
☐ Yes | ☒ **No** - The shaking of movable objects (tables, vases, knick-knacks, ...)?

### Has it been witnessed or later observed

- ☐ Yes | ☒ **No** - The clattering of glasses and dishes in buffets?  
☐ Yes | ☒ **No** - The swaying of frames hanging on the wall?  
☐ Yes | ☒ **No** - The creaking of floors?  
☐ Yes | ☒ **No** - Small fragments of plaster falling from ceilings?  
☒ **Yes** | ☐ No - A confusion of the inhabitants (people leaving the house).

### Has it been observed

- ☐ Yes | ☒ **No** - Moving knick-knacks?  
☐ Yes | ☒ **No** - Moving light objects?  
 Which ones?:  
☐ Yes | ☒ **No** - The falling of frames hanging on the wall?  
☐ Yes | ☒ **No** - The falling of light objects placed on polished furniture or marble  
☐ Yes | ☒ **No** - Cracked or broken windows?  
☐ Yes | ☒ **No** - Broken crockery?  
☐ Yes | ☒ **No** - Light objects (vases, flower pots, etc.) spilled?  
☐ Yes | ☒ **No** - Has light furniture moved?  
☐ Yes | ☒ **No** - Has heavy furniture (chests, stoves, ...) vibrated?  
☐ Yes | ☒ **No** - Did bells tinkle?  
☐ Yes | ☒ **No** - Did heavy furniture move?  
☐ Yes | ☒ **No** - Did light furniture tip over?  
☐ Yes | ☒ **No** - Have doors been moved on their hinges?

### Has it been observed

- ☐ Yes | ☒ **No** - Falling pieces of plaster from the ceilings?  
☐ Yes | ☒ **No** - Cracks in wall plaster?  
☐ Yes | ☒ **No** - An exceptional fall of a chimney in poor condition?  
☐ Yes | ☒ **No** - An exceptional fall of some bricks?  
☐ Yes | ☒ **No** - Have there been several damaged chimneys?

How many?:

- ☐ Yes | ☒ **No** - Have there been several chimneys overturned?

How many?:

% for the municipality?:

- ☐ Yes | ☒ **No** - Have there been any falls of façade ornaments?

How important?:

- ☐ Yes | ☒ **No** - Have there been deep cracks in the brick walls?  
☐ Yes | ☒ **No** - Have there been deep cracks in the concrete walls?  
☐ Yes | ☒ **No** - Have there been landslides along the banks or slopes?

Importance:

ADDITIONAL COMMENTS:

## Official inquiry for OBOURG (BE)

Location: 50.475°N 4.008°E, at 11.0 km from the epicentre.

**Imin: 3 - Imax: 3**

### Did some residents perceive

☒ **Yes** | ☐ **No** - Light vibrations?

☒ **Yes** | ☐ **No** - A characteristic noise: rumbling or rolling?

### Did many residents perceive

☐ **Yes** | ☒ **No** - A clear shaking of the building?

☐ **Yes** | ☒ **No** - A loud rumble?

### Have we witnessed

☐ **Yes** | ☒ **No** - The oscillation of chandeliers or freely suspended objects?

☐ **Yes** | ☒ **No** - Swinging chairs or beds?

☐ **Yes** | ☒ **No** - Cracking ceilings?

☐ **Yes** | ☒ **No** - Sleepers waking up?

### Has it been witnessed or later observed

☒ **Yes** | ☐ **No** - The shivering of windows and doors?

☐ **Yes** | ☒ **No** - The shaking of movable objects (tables, vases, knick-knacks, ...)?

### Has it been witnessed or later observed

☐ **Yes** | ☒ **No** - The clattering of glasses and dishes in buffets?

☐ **Yes** | ☒ **No** - The swaying of frames hanging on the wall?

☐ **Yes** | ☒ **No** - The creaking of floors?

☐ **Yes** | ☒ **No** - Small fragments of plaster falling from ceilings?

☐ **Yes** | ☒ **No** - A confusion of the inhabitants (people leaving the house).

### Has it been observed

☐ **Yes** | ☒ **No** - Moving knick-knacks?

☐ **Yes** | ☒ **No** - Moving light objects?

Which ones?:

☐ **Yes** | ☒ **No** - The falling of frames hanging on the wall?

☐ **Yes** | ☒ **No** - The falling of light objects placed on polished furniture or marble

☐ **Yes** | ☒ **No** - Cracked or broken windows?

☐ **Yes** | ☒ **No** - Broken crockery?

☐ **Yes** | ☒ **No** - Light objects (vases, flower pots, etc.) spilled?

☐ **Yes** | ☒ **No** - Has light furniture moved?

☐ **Yes** | ☒ **No** - Has heavy furniture (chests, stoves, ...) vibrated?

☐ **Yes** | ☒ **No** - Did bells tinkle?

☐ **Yes** | ☒ **No** - Did heavy furniture move?

☐ **Yes** | ☒ **No** - Did light furniture tip over?

☐ **Yes** | ☒ **No** - Have doors been moved on their hinges?

### Has it been observed

☐ **Yes** | ☒ **No** - Falling pieces of plaster from the ceilings?

☐ **Yes** | ☒ **No** - Cracks in wall plaster?

☐ **Yes** | ☒ **No** - An exceptional fall of a chimney in poor condition?

☐ **Yes** | ☒ **No** - An exceptional fall of some bricks?

☐ **Yes** | ☒ **No** - Have there been several damaged chimneys?

How many?:

☐ **Yes** | ☒ **No** - Have there been several chimneys overturned?

How many?:

% for the municipality?:

☐ **Yes** | ☒ **No** - Have there been any falls of façade ornaments?

How important?:

☐ **Yes** | ☒ **No** - Have there been deep cracks in the brick walls?

☐ **Yes** | ☒ **No** - Have there been deep cracks in the concrete walls?

☐ **Yes** | ☒ **No** - Have there been landslides along the banks or slopes?

Importance:

ADDITIONAL COMMENTS:

## Official inquiry for PATURAGES (BE)

Location: 50.414°N 3.862°E, at 1.9 km from the epicentre.

Imin: 5 - Imax: 5

### Did some residents perceive

- ☐ Yes | ☒ **No** - Light vibrations?  
☐ Yes | ☒ **No** - A characteristic noise: rumbling or rolling?

### Did many residents perceive

- ☒ **Yes** | ☐ No - A clear shaking of the building?  
☒ **Yes** | ☐ No - A loud rumble?

### Have we witnessed

- ☐ Yes | ☒ **No** - The oscillation of chandeliers or freely suspended objects?  
☐ Yes | ☒ **No** - Swinging chairs or beds?  
☐ Yes | ☒ **No** - Cracking ceilings?  
☐ Yes | ☒ **No** - Sleepers waking up?

### Has it been witnessed or later observed

- ☒ **Yes** | ☐ No - The shivering of windows and doors?  
☒ **Yes** | ☐ No - The shaking of movable objects (tables, vases, knick-knacks, ...)?

### Has it been witnessed or later observed

- ☐ Yes | ☒ **No** - The clattering of glasses and dishes in buffets?  
☐ Yes | ☒ **No** - The swaying of frames hanging on the wall?  
☐ Yes | ☒ **No** - The creaking of floors?  
☐ Yes | ☒ **No** - Small fragments of plaster falling from ceilings?  
☐ Yes | ☒ **No** - A confusion of the inhabitants (people leaving the house).

### Has it been observed

- ☐ Yes | ☒ **No** - Moving knick-knacks?  
☐ Yes | ☒ **No** - Moving light objects?  
 Which ones?:  
☒ **Yes** | ☐ No - The falling of frames hanging on the wall?  
☐ Yes | ☒ **No** - The falling of light objects placed on polished furniture or marble  
☐ Yes | ☒ **No** - Cracked or broken windows?  
☐ Yes | ☒ **No** - Broken crockery?  
☐ Yes | ☒ **No** - Light objects (vases, flower pots, etc.) spilled?  
☐ Yes | ☒ **No** - Has light furniture moved?  
☒ **Yes** | ☐ No - Has heavy furniture (chests, stoves, ...) vibrated?  
☐ Yes | ☒ **No** - Did bells tinkle?  
☐ Yes | ☒ **No** - Did heavy furniture move?  
☐ Yes | ☒ **No** - Did light furniture tip over?  
☐ Yes | ☒ **No** - Have doors been moved on their hinges?

### Has it been observed

- ☐ Yes | ☒ **No** - Falling pieces of plaster from the ceilings?  
☐ Yes | ☒ **No** - Cracks in wall plaster?  
☒ **Yes** | ☐ No - An exceptional fall of a chimney in poor condition?  
☐ Yes | ☒ **No** - An exceptional fall of some bricks?  
☐ Yes | ☒ **No** - Have there been several damaged chimneys?

How many?:

- ☐ Yes | ☒ **No** - Have there been several chimneys overturned?

How many?:

% for the municipality?:

- ☐ Yes | ☒ **No** - Have there been any falls of façade ornaments?

How important?:

- ☐ Yes | ☒ **No** - Have there been deep cracks in the brick walls?  
☐ Yes | ☒ **No** - Have there been deep cracks in the concrete walls?  
☐ Yes | ☒ **No** - Have there been landslides along the banks or slopes?

Importance:

ADDITIONAL COMMENTS: ***pour la secousse de 7H11, des fils électriques aériens ont oscillés pendant 2-3 minutes. a 7H37, plusieurs personnes ont encore entendu des vibrations d'objets qui ont duré , à notre avis, environ deux secondes.***

## Official inquiry for POMMEROEUL (BE)

Location: 50.461°N 3.713°E, at 11.7 km from the epicentre.

**Imin: 3 - Imax: 3**

### Did some residents perceive

- ☐ Yes | ☒ **No** - Light vibrations?  
☒ **Yes** | ☐ No - A characteristic noise: rumbling or rolling?

### Did many residents perceive

- ☐ Yes | ☒ **No** - A clear shaking of the building?  
☐ Yes | ☒ **No** - A loud rumble?

### Have we witnessed

- ☐ Yes | ☒ **No** - The oscillation of chandeliers or freely suspended objects?  
☐ Yes | ☒ **No** - Swinging chairs or beds?  
☐ Yes | ☒ **No** - Cracking ceilings?  
☐ Yes | ☒ **No** - Sleepers waking up?

### Has it been witnessed or later observed

- ☐ Yes | ☒ **No** - The shivering of windows and doors?  
☐ Yes | ☒ **No** - The shaking of movable objects (tables, vases, knick-knacks, ...)?

### Has it been witnessed or later observed

- ☐ Yes | ☒ **No** - The clattering of glasses and dishes in buffets?  
☐ Yes | ☒ **No** - The swaying of frames hanging on the wall?  
☐ Yes | ☒ **No** - The creaking of floors?  
☐ Yes | ☒ **No** - Small fragments of plaster falling from ceilings?  
☐ Yes | ☒ **No** - A confusion of the inhabitants (people leaving the house).

### Has it been observed

- ☐ Yes | ☒ **No** - Moving knick-knacks?  
☐ Yes | ☒ **No** - Moving light objects?

Which ones?:

- ☐ Yes | ☒ **No** - The falling of frames hanging on the wall?  
☐ Yes | ☒ **No** - The falling of light objects placed on polished furniture or marble  
☐ Yes | ☒ **No** - Cracked or broken windows?  
☐ Yes | ☒ **No** - Broken crockery?  
☐ Yes | ☒ **No** - Light objects (vases, flower pots, etc.) spilled?  
☐ Yes | ☒ **No** - Has light furniture moved?  
☐ Yes | ☒ **No** - Has heavy furniture (chests, stoves, ...) vibrated?  
☐ Yes | ☒ **No** - Did bells tinkle?  
☐ Yes | ☒ **No** - Did heavy furniture move?  
☐ Yes | ☒ **No** - Did light furniture tip over?  
☐ Yes | ☒ **No** - Have doors been moved on their hinges?

### Has it been observed

- ☐ Yes | ☒ **No** - Falling pieces of plaster from the ceilings?  
☐ Yes | ☒ **No** - Cracks in wall plaster?  
☐ Yes | ☒ **No** - An exceptional fall of a chimney in poor condition?  
☐ Yes | ☒ **No** - An exceptional fall of some bricks?  
☐ Yes | ☒ **No** - Have there been several damaged chimneys?

How many?:

- ☐ Yes | ☒ **No** - Have there been several chimneys overturned?

How many?:

% for the municipality?:

- ☐ Yes | ☒ **No** - Have there been any falls of façade ornaments?

How important?:

- ☐ Yes | ☒ **No** - Have there been deep cracks in the brick walls?  
☐ Yes | ☒ **No** - Have there been deep cracks in the concrete walls?  
☐ Yes | ☒ **No** - Have there been landslides along the banks or slopes?

Importance:

ADDITIONAL COMMENTS:

## Official inquiry for QUAREGNON (BE)

Location: 50.443°N 3.865°E, at 1.5 km from the epicentre.

**Imin: 5 - Imax: 5**

### Did some residents perceive

- ☐ Yes | ☒ **No** - Light vibrations?  
☒ **Yes** | ☐ No - A characteristic noise: rumbling or rolling?

### Did many residents perceive

- ☐ Yes | ☒ **No** - A clear shaking of the building?  
☒ **Yes** | ☐ No - A loud rumble?

### Have we witnessed

- ☐ Yes | ☒ **No** - The oscillation of chandeliers or freely suspended objects?  
☐ Yes | ☒ **No** - Swinging chairs or beds?  
☒ **Yes** | ☐ No - Cracking ceilings?  
☒ **Yes** | ☐ No - Sleepers waking up?

### Has it been witnessed or later observed

- ☒ **Yes** | ☐ No - The shivering of windows and doors?  
☒ **Yes** | ☐ No - The shaking of movable objects (tables, vases, knick-knacks, ...)?

### Has it been witnessed or later observed

- ☐ Yes | ☒ **No** - The clattering of glasses and dishes in buffets?  
☐ Yes | ☒ **No** - The swaying of frames hanging on the wall?  
☐ Yes | ☒ **No** - The creaking of floors?  
☐ Yes | ☒ **No** - Small fragments of plaster falling from ceilings?  
☒ **Yes** | ☐ No - A confusion of the inhabitants (people leaving the house).

### Has it been observed

- ☐ Yes | ☒ **No** - Moving knick-knacks?  
☐ Yes | ☒ **No** - Moving light objects?  
 Which ones?:  
☐ Yes | ☒ **No** - The falling of frames hanging on the wall?  
☐ Yes | ☒ **No** - The falling of light objects placed on polished furniture or marble  
☐ Yes | ☒ **No** - Cracked or broken windows?  
☐ Yes | ☒ **No** - Broken crockery?  
☐ Yes | ☒ **No** - Light objects (vases, flower pots, etc.) spilled?  
☐ Yes | ☒ **No** - Has light furniture moved?  
☐ Yes | ☒ **No** - Has heavy furniture (chests, stoves, ...) vibrated?  
☐ Yes | ☒ **No** - Did bells tinkle?  
☐ Yes | ☒ **No** - Did heavy furniture move?  
☐ Yes | ☒ **No** - Did light furniture tip over?  
☐ Yes | ☒ **No** - Have doors been moved on their hinges?

### Has it been observed

- ☐ Yes | ☒ **No** - Falling pieces of plaster from the ceilings?  
☐ Yes | ☒ **No** - Cracks in wall plaster?  
☒ **Yes** | ☐ No - An exceptional fall of a chimney in poor condition?  
☒ **Yes** | ☐ No - An exceptional fall of some bricks?  
☐ Yes | ☒ **No** - Have there been several damaged chimneys?

How many?:

- ☐ Yes | ☒ **No** - Have there been several chimneys overturned?

How many?:

% for the municipality?:

- ☐ Yes | ☒ **No** - Have there been any falls of façade ornaments?

How important?:

- ☐ Yes | ☒ **No** - Have there been deep cracks in the brick walls?  
☐ Yes | ☒ **No** - Have there been deep cracks in the concrete walls?  
☐ Yes | ☒ **No** - Have there been landslides along the banks or slopes?

Importance:

ADDITIONAL COMMENTS:

## Official inquiry for SAINT-DENIS (BE)

Location: 50.491°N 4.019°E, at 12.6 km from the epicentre.

**Imin: 3 - Imax: 3**

### Did some residents perceive

- ☒ **Yes** | ☐ **No** - Light vibrations?  
☐ **Yes** | ☒ **No** - A characteristic noise: rumbling or rolling?

### Did many residents perceive

- ☐ **Yes** | ☒ **No** - A clear shaking of the building?  
☐ **Yes** | ☒ **No** - A loud rumble?

### Have we witnessed

- ☐ **Yes** | ☒ **No** - The oscillation of chandeliers or freely suspended objects?  
☐ **Yes** | ☒ **No** - Swinging chairs or beds?  
☐ **Yes** | ☒ **No** - Cracking ceilings?  
☐ **Yes** | ☒ **No** - Sleepers waking up?

### Has it been witnessed or later observed

- ☐ **Yes** | ☒ **No** - The shivering of windows and doors?  
☐ **Yes** | ☒ **No** - The shaking of movable objects (tables, vases, knick-knacks, ...)?

### Has it been witnessed or later observed

- ☐ **Yes** | ☒ **No** - The clattering of glasses and dishes in buffets?  
☐ **Yes** | ☒ **No** - The swaying of frames hanging on the wall?  
☐ **Yes** | ☒ **No** - The creaking of floors?  
☐ **Yes** | ☒ **No** - Small fragments of plaster falling from ceilings?  
☐ **Yes** | ☒ **No** - A confusion of the inhabitants (people leaving the house).

### Has it been observed

- ☐ **Yes** | ☒ **No** - Moving knick-knacks?  
☐ **Yes** | ☒ **No** - Moving light objects?  
 Which ones?:  
☐ **Yes** | ☒ **No** - The falling of frames hanging on the wall?  
☐ **Yes** | ☒ **No** - The falling of light objects placed on polished furniture or marble  
☐ **Yes** | ☒ **No** - Cracked or broken windows?  
☐ **Yes** | ☒ **No** - Broken crockery?  
☐ **Yes** | ☒ **No** - Light objects (vases, flower pots, etc.) spilled?  
☐ **Yes** | ☒ **No** - Has light furniture moved?  
☐ **Yes** | ☒ **No** - Has heavy furniture (chests, stoves, ...) vibrated?  
☐ **Yes** | ☒ **No** - Did bells tinkle?  
☐ **Yes** | ☒ **No** - Did heavy furniture move?  
☐ **Yes** | ☒ **No** - Did light furniture tip over?  
☐ **Yes** | ☒ **No** - Have doors been moved on their hinges?

### Has it been observed

- ☐ **Yes** | ☒ **No** - Falling pieces of plaster from the ceilings?  
☐ **Yes** | ☒ **No** - Cracks in wall plaster?  
☐ **Yes** | ☒ **No** - An exceptional fall of a chimney in poor condition?  
☐ **Yes** | ☒ **No** - An exceptional fall of some bricks?  
☐ **Yes** | ☒ **No** - Have there been several damaged chimneys?

How many?:

- ☐ **Yes** | ☒ **No** - Have there been several chimneys overturned?

How many?:

% for the municipality?:

- ☐ **Yes** | ☒ **No** - Have there been any falls of façade ornaments?

How important?:

- ☐ **Yes** | ☒ **No** - Have there been deep cracks in the brick walls?  
☐ **Yes** | ☒ **No** - Have there been deep cracks in the concrete walls?  
☐ **Yes** | ☒ **No** - Have there been landslides along the banks or slopes?

Importance:

ADDITIONAL COMMENTS:

## Official inquiry for SAINT-GHISLAIN (BE)

Location: 50.447°N 3.821°E, at 4.0 km from the epicentre.

**Imin: 4 - Imax: 4**

### Did some residents perceive

- ☒ **Yes** | ☐ No - Light vibrations?  
☒ **Yes** | ☐ No - A characteristic noise: rumbling or rolling?

### Did many residents perceive

- ☐ Yes | ☒ **No** - A clear shaking of the building?  
☐ Yes | ☒ **No** - A loud rumble?

### Have we witnessed

- ☐ Yes | ☒ **No** - The oscillation of chandeliers or freely suspended objects?  
☒ **Yes** | ☐ No - Swinging chairs or beds?  
☐ Yes | ☒ **No** - Cracking ceilings?  
☒ **Yes** | ☐ No - Sleepers waking up?

### Has it been witnessed or later observed

- ☒ **Yes** | ☐ No - The shivering of windows and doors?  
☐ Yes | ☒ **No** - The shaking of movable objects (tables, vases, knick-knacks, ...)?

### Has it been witnessed or later observed

- ☐ Yes | ☒ **No** - The clattering of glasses and dishes in buffets?  
☐ Yes | ☒ **No** - The swaying of frames hanging on the wall?  
☐ Yes | ☒ **No** - The creaking of floors?  
☐ Yes | ☒ **No** - Small fragments of plaster falling from ceilings?  
☒ **Yes** | ☐ No - A confusion of the inhabitants (people leaving the house).

### Has it been observed

- ☐ Yes | ☒ **No** - Moving knick-knacks?  
☐ Yes | ☒ **No** - Moving light objects?  
 Which ones?:  
☐ Yes | ☒ **No** - The falling of frames hanging on the wall?  
☐ Yes | ☒ **No** - The falling of light objects placed on polished furniture or marble  
☐ Yes | ☒ **No** - Cracked or broken windows?  
☐ Yes | ☒ **No** - Broken crockery?  
☐ Yes | ☒ **No** - Light objects (vases, flower pots, etc.) spilled?  
☐ Yes | ☒ **No** - Has light furniture moved?  
☐ Yes | ☒ **No** - Has heavy furniture (chests, stoves, ...) vibrated?  
☐ Yes | ☒ **No** - Did bells tinkle?  
☐ Yes | ☒ **No** - Did heavy furniture move?  
☐ Yes | ☒ **No** - Did light furniture tip over?  
☐ Yes | ☒ **No** - Have doors been moved on their hinges?

### Has it been observed

- ☐ Yes | ☒ **No** - Falling pieces of plaster from the ceilings?  
☐ Yes | ☒ **No** - Cracks in wall plaster?  
☐ Yes | ☒ **No** - An exceptional fall of a chimney in poor condition?  
☐ Yes | ☒ **No** - An exceptional fall of some bricks?  
☐ Yes | ☒ **No** - Have there been several damaged chimneys?

How many?:

- ☐ Yes | ☒ **No** - Have there been several chimneys overturned?

How many?:

% for the municipality?:

- ☐ Yes | ☒ **No** - Have there been any falls of façade ornaments?

How important?:

- ☐ Yes | ☒ **No** - Have there been deep cracks in the brick walls?  
☐ Yes | ☒ **No** - Have there been deep cracks in the concrete walls?  
☐ Yes | ☒ **No** - Have there been landslides along the banks or slopes?

Importance:

ADDITIONAL COMMENTS: **une seconde secousse a également été perçue vers 7H45 et elle présentait les même caractéristiques que la première.**

## Official inquiry for SAINT-SYMPHORIEN (BE)

Location: 50.438°N 4.007°E, at 9.8 km from the epicentre.

**Imin: 3 - Imax: 3**

### Did some residents perceive

- ☒ **Yes** | ☐ No - Light vibrations?  
☒ **Yes** | ☐ No - A characteristic noise: rumbling or rolling?

### Did many residents perceive

- ☐ Yes | ☒ **No** - A clear shaking of the building?  
☐ Yes | ☒ **No** - A loud rumble?

### Have we witnessed

- ☒ **Yes** | ☐ No - The oscillation of chandeliers or freely suspended objects?  
☐ Yes | ☒ **No** - Swinging chairs or beds?  
☐ Yes | ☒ **No** - Cracking ceilings?  
☐ Yes | ☒ **No** - Sleepers waking up?

### Has it been witnessed or later observed

- ☐ Yes | ☒ **No** - The shivering of windows and doors?  
☐ Yes | ☒ **No** - The shaking of movable objects (tables, vases, knick-knacks, ...)?

### Has it been witnessed or later observed

- ☒ **Yes** | ☐ No - The clattering of glasses and dishes in buffets?  
☐ Yes | ☒ **No** - The swaying of frames hanging on the wall?  
☐ Yes | ☒ **No** - The creaking of floors?  
☐ Yes | ☒ **No** - Small fragments of plaster falling from ceilings?  
☒ **Yes** | ☐ No - A confusion of the inhabitants (people leaving the house).

### Has it been observed

- ☒ **Yes** | ☐ No - Moving knick-knacks?  
☒ **Yes** | ☐ No - Moving light objects?

Which ones?:

- ☐ Yes | ☒ **No** - The falling of frames hanging on the wall?  
☐ Yes | ☒ **No** - The falling of light objects placed on polished furniture or marble  
☐ Yes | ☒ **No** - Cracked or broken windows?  
☐ Yes | ☒ **No** - Broken crockery?  
☐ Yes | ☒ **No** - Light objects (vases, flower pots, etc.) spilled?  
☐ Yes | ☒ **No** - Has light furniture moved?  
☐ Yes | ☒ **No** - Has heavy furniture (chests, stoves, ...) vibrated?  
☐ Yes | ☒ **No** - Did bells tinkle?  
☐ Yes | ☒ **No** - Did heavy furniture move?  
☐ Yes | ☒ **No** - Did light furniture tip over?  
☐ Yes | ☒ **No** - Have doors been moved on their hinges?

### Has it been observed

- ☐ Yes | ☒ **No** - Falling pieces of plaster from the ceilings?  
☐ Yes | ☒ **No** - Cracks in wall plaster?  
☐ Yes | ☒ **No** - An exceptional fall of a chimney in poor condition?  
☐ Yes | ☒ **No** - An exceptional fall of some bricks?  
☐ Yes | ☒ **No** - Have there been several damaged chimneys?

How many?:

- ☐ Yes | ☒ **No** - Have there been several chimneys overturned?

How many?:

% for the municipality?:

- ☐ Yes | ☒ **No** - Have there been any falls of façade ornaments?

How important?:

- ☐ Yes | ☒ **No** - Have there been deep cracks in the brick walls?  
☐ Yes | ☒ **No** - Have there been deep cracks in the concrete walls?  
☐ Yes | ☒ **No** - Have there been landslides along the banks or slopes?

Importance:

ADDITIONAL COMMENTS:

## Official inquiry for SARS-LA-BRUYERE (BE)

Location: 50.371°N 3.879°E, at 6.6 km from the epicentre.

**Imin: 3 - Imax: 3**

### Did some residents perceive

- ☒ **Yes** | ☐ No - Light vibrations?  
☒ **Yes** | ☐ No - A characteristic noise: rumbling or rolling?

### Did many residents perceive

- ☐ Yes | ☒ **No** - A clear shaking of the building?  
☐ Yes | ☒ **No** - A loud rumble?

### Have we witnessed

- ☐ Yes | ☒ **No** - The oscillation of chandeliers or freely suspended objects?  
☒ **Yes** | ☐ No - Swinging chairs or beds?  
☐ Yes | ☒ **No** - Cracking ceilings?  
☐ Yes | ☒ **No** - Sleepers waking up?

### Has it been witnessed or later observed

- ☒ **Yes** | ☐ No - The shivering of windows and doors?  
☒ **Yes** | ☐ No - The shaking of movable objects (tables, vases, knick-knacks, ...)?

### Has it been witnessed or later observed

- ☒ **Yes** | ☐ No - The clattering of glasses and dishes in buffets?  
☐ Yes | ☒ **No** - The swaying of frames hanging on the wall?  
☐ Yes | ☒ **No** - The creaking of floors?  
☐ Yes | ☒ **No** - Small fragments of plaster falling from ceilings?  
☐ Yes | ☒ **No** - A confusion of the inhabitants (people leaving the house).

### Has it been observed

- ☐ Yes | ☒ **No** - Moving knick-knacks?  
☒ **Yes** | ☐ No - Moving light objects?  
 Which ones?:  
☐ Yes | ☒ **No** - The falling of frames hanging on the wall?  
☐ Yes | ☒ **No** - The falling of light objects placed on polished furniture or marble  
☐ Yes | ☒ **No** - Cracked or broken windows?  
☐ Yes | ☒ **No** - Broken crockery?  
☐ Yes | ☒ **No** - Light objects (vases, flower pots, etc.) spilled?  
☐ Yes | ☒ **No** - Has light furniture moved?  
☐ Yes | ☒ **No** - Has heavy furniture (chests, stoves, ...) vibrated?  
☐ Yes | ☒ **No** - Did bells tinkle?  
☐ Yes | ☒ **No** - Did heavy furniture move?  
☐ Yes | ☒ **No** - Did light furniture tip over?  
☐ Yes | ☒ **No** - Have doors been moved on their hinges?

### Has it been observed

- ☐ Yes | ☒ **No** - Falling pieces of plaster from the ceilings?  
☐ Yes | ☒ **No** - Cracks in wall plaster?  
☐ Yes | ☒ **No** - An exceptional fall of a chimney in poor condition?  
☐ Yes | ☒ **No** - An exceptional fall of some bricks?  
☐ Yes | ☒ **No** - Have there been several damaged chimneys?

How many?:

- ☐ Yes | ☒ **No** - Have there been several chimneys overturned?

How many?:

% for the municipality?:

- ☐ Yes | ☒ **No** - Have there been any falls of façade ornaments?

How important?:

- ☐ Yes | ☒ **No** - Have there been deep cracks in the brick walls?  
☐ Yes | ☒ **No** - Have there been deep cracks in the concrete walls?  
☐ Yes | ☒ **No** - Have there been landslides along the banks or slopes?

Importance:

ADDITIONAL COMMENTS:

## Official inquiry for SPIENNES (BE)

Location: 50.426°N 3.988°E, at 8.4 km from the epicentre.

**Imin: 3 - Imax: 3**

### Did some residents perceive

- ☐ Yes | ☒ **No** - Light vibrations?  
☒ **Yes** | ☐ No - A characteristic noise: rumbling or rolling?

### Did many residents perceive

- ☐ Yes | ☒ **No** - A clear shaking of the building?  
☐ Yes | ☒ **No** - A loud rumble?

### Have we witnessed

- ☐ Yes | ☒ **No** - The oscillation of chandeliers or freely suspended objects?  
☐ Yes | ☒ **No** - Swinging chairs or beds?  
☐ Yes | ☒ **No** - Cracking ceilings?  
☐ Yes | ☒ **No** - Sleepers waking up?

### Has it been witnessed or later observed

- ☐ Yes | ☒ **No** - The shivering of windows and doors?  
☐ Yes | ☒ **No** - The shaking of movable objects (tables, vases, knick-knacks, ...)?

### Has it been witnessed or later observed

- ☒ **Yes** | ☐ No - The clattering of glasses and dishes in buffets?  
☐ Yes | ☒ **No** - The swaying of frames hanging on the wall?  
☐ Yes | ☒ **No** - The creaking of floors?  
☐ Yes | ☒ **No** - Small fragments of plaster falling from ceilings?  
☐ Yes | ☒ **No** - A confusion of the inhabitants (people leaving the house).

### Has it been observed

- ☒ **Yes** | ☐ No - Moving knick-knacks?  
☒ **Yes** | ☐ No - Moving light objects?

Which ones?:

- ☐ Yes | ☒ **No** - The falling of frames hanging on the wall?  
☐ Yes | ☒ **No** - The falling of light objects placed on polished furniture or marble  
☐ Yes | ☒ **No** - Cracked or broken windows?  
☐ Yes | ☒ **No** - Broken crockery?  
☐ Yes | ☒ **No** - Light objects (vases, flower pots, etc.) spilled?  
☐ Yes | ☒ **No** - Has light furniture moved?  
☐ Yes | ☒ **No** - Has heavy furniture (chests, stoves, ...) vibrated?  
☐ Yes | ☒ **No** - Did bells tinkle?  
☐ Yes | ☒ **No** - Did heavy furniture move?  
☐ Yes | ☒ **No** - Did light furniture tip over?  
☐ Yes | ☒ **No** - Have doors been moved on their hinges?

### Has it been observed

- ☐ Yes | ☒ **No** - Falling pieces of plaster from the ceilings?  
☐ Yes | ☒ **No** - Cracks in wall plaster?  
☐ Yes | ☒ **No** - An exceptional fall of a chimney in poor condition?  
☐ Yes | ☒ **No** - An exceptional fall of some bricks?  
☐ Yes | ☒ **No** - Have there been several damaged chimneys?

How many?:

- ☐ Yes | ☒ **No** - Have there been several chimneys overturned?

How many?:

% for the municipality?:

- ☐ Yes | ☒ **No** - Have there been any falls of façade ornaments?

How important?:

- ☐ Yes | ☒ **No** - Have there been deep cracks in the brick walls?  
☐ Yes | ☒ **No** - Have there been deep cracks in the concrete walls?  
☐ Yes | ☒ **No** - Have there been landslides along the banks or slopes?

Importance:

ADDITIONAL COMMENTS:

## Official inquiry for TERTRE (BE)

Location: 50.468°N 3.812°E, at 5.9 km from the epicentre.

**Imin: 4 - Imax: 4**

### Did some residents perceive

- ☐ Yes | ☒ **No** - Light vibrations?  
☐ Yes | ☒ **No** - A characteristic noise: rumbling or rolling?

### Did many residents perceive

- ☒ **Yes** | ☐ No - A clear shaking of the building?  
☒ **Yes** | ☐ No - A loud rumble?

### Have we witnessed

- ☒ **Yes** | ☐ No - The oscillation of chandeliers or freely suspended objects?  
☒ **Yes** | ☐ No - Swinging chairs or beds?  
☐ Yes | ☒ **No** - Cracking ceilings?  
☒ **Yes** | ☐ No - Sleepers waking up?

### Has it been witnessed or later observed

- ☒ **Yes** | ☐ No - The shivering of windows and doors?  
☒ **Yes** | ☐ No - The shaking of movable objects (tables, vases, knick-knacks, ...)?

### Has it been witnessed or later observed

- ☒ **Yes** | ☐ No - The clattering of glasses and dishes in buffets?  
☐ Yes | ☒ **No** - The swaying of frames hanging on the wall?  
☐ Yes | ☒ **No** - The creaking of floors?  
☐ Yes | ☒ **No** - Small fragments of plaster falling from ceilings?  
☒ **Yes** | ☐ No - A confusion of the inhabitants (people leaving the house).

### Has it been observed

- ☐ Yes | ☒ **No** - Moving knick-knacks?  
☐ Yes | ☒ **No** - Moving light objects?  
 Which ones?:  
☐ Yes | ☒ **No** - The falling of frames hanging on the wall?  
☐ Yes | ☒ **No** - The falling of light objects placed on polished furniture or marble  
☐ Yes | ☒ **No** - Cracked or broken windows?  
☐ Yes | ☒ **No** - Broken crockery?  
☐ Yes | ☒ **No** - Light objects (vases, flower pots, etc.) spilled?  
☐ Yes | ☒ **No** - Has light furniture moved?  
☐ Yes | ☒ **No** - Has heavy furniture (chests, stoves, ...) vibrated?  
☐ Yes | ☒ **No** - Did bells tinkle?  
☐ Yes | ☒ **No** - Did heavy furniture move?  
☐ Yes | ☒ **No** - Did light furniture tip over?  
☐ Yes | ☒ **No** - Have doors been moved on their hinges?

### Has it been observed

- ☐ Yes | ☒ **No** - Falling pieces of plaster from the ceilings?  
☐ Yes | ☒ **No** - Cracks in wall plaster?  
☐ Yes | ☒ **No** - An exceptional fall of a chimney in poor condition?  
☐ Yes | ☒ **No** - An exceptional fall of some bricks?  
☐ Yes | ☒ **No** - Have there been several damaged chimneys?

How many?:

- ☐ Yes | ☒ **No** - Have there been several chimneys overturned?

How many?:

% for the municipality?:

- ☐ Yes | ☒ **No** - Have there been any falls of façade ornaments?

How important?:

- ☐ Yes | ☒ **No** - Have there been deep cracks in the brick walls?  
☐ Yes | ☒ **No** - Have there been deep cracks in the concrete walls?  
☐ Yes | ☒ **No** - Have there been landslides along the banks or slopes?

Importance:

ADDITIONAL COMMENTS:

## Official inquiry for VILLEROT (BE)

Location: 50.486°N 3.792°E, at 8.5 km from the epicentre.

**Imin: 3 - Imax: 3**

### Did some residents perceive

- ☐ Yes | ☒ **No** - Light vibrations?  
☐ Yes | ☒ **No** - A characteristic noise: rumbling or rolling?

### Did many residents perceive

- ☐ Yes | ☒ **No** - A clear shaking of the building?  
☒ **Yes** | ☐ No - A loud rumble?

### Have we witnessed

- ☒ **Yes** | ☐ No - The oscillation of chandeliers or freely suspended objects?  
☒ **Yes** | ☐ No - Swinging chairs or beds?  
☐ Yes | ☒ **No** - Cracking ceilings?  
☐ Yes | ☒ **No** - Sleepers waking up?

### Has it been witnessed or later observed

- ☐ Yes | ☒ **No** - The shivering of windows and doors?  
☒ **Yes** | ☐ No - The shaking of movable objects (tables, vases, knick-knacks, ...)?

### Has it been witnessed or later observed

- ☐ Yes | ☒ **No** - The clattering of glasses and dishes in buffets?  
☐ Yes | ☒ **No** - The swaying of frames hanging on the wall?  
☐ Yes | ☒ **No** - The creaking of floors?  
☐ Yes | ☒ **No** - Small fragments of plaster falling from ceilings?  
☐ Yes | ☒ **No** - A confusion of the inhabitants (people leaving the house).

### Has it been observed

- ☐ Yes | ☒ **No** - Moving knick-knacks?  
☒ **Yes** | ☐ No - Moving light objects?

Which ones?:

- ☐ Yes | ☒ **No** - The falling of frames hanging on the wall?  
☐ Yes | ☒ **No** - The falling of light objects placed on polished furniture or marble  
☐ Yes | ☒ **No** - Cracked or broken windows?  
☐ Yes | ☒ **No** - Broken crockery?  
☐ Yes | ☒ **No** - Light objects (vases, flower pots, etc.) spilled?  
☐ Yes | ☒ **No** - Has light furniture moved?  
☐ Yes | ☒ **No** - Has heavy furniture (chests, stoves, ...) vibrated?  
☐ Yes | ☒ **No** - Did bells tinkle?  
☐ Yes | ☒ **No** - Did heavy furniture move?  
☐ Yes | ☒ **No** - Did light furniture tip over?  
☐ Yes | ☒ **No** - Have doors been moved on their hinges?

### Has it been observed

- ☐ Yes | ☒ **No** - Falling pieces of plaster from the ceilings?  
☐ Yes | ☒ **No** - Cracks in wall plaster?  
☐ Yes | ☒ **No** - An exceptional fall of a chimney in poor condition?  
☐ Yes | ☒ **No** - An exceptional fall of some bricks?  
☐ Yes | ☒ **No** - Have there been several damaged chimneys?

How many?:

- ☐ Yes | ☒ **No** - Have there been several chimneys overturned?

How many?:

% for the municipality?:

- ☐ Yes | ☒ **No** - Have there been any falls of façade ornaments?

How important?:

- ☐ Yes | ☒ **No** - Have there been deep cracks in the brick walls?  
☐ Yes | ☒ **No** - Have there been deep cracks in the concrete walls?  
☐ Yes | ☒ **No** - Have there been landslides along the banks or slopes?

Importance:

ADDITIONAL COMMENTS:

## Official inquiry for WARQUIGNIES (BE)

Location: 50.401°N 3.822°E, at 4.7 km from the epicentre.

**Imin: 4 - Imax: 4**

### Did some residents perceive

- ☒ **Yes** | ☐ No - Light vibrations?  
☒ **Yes** | ☐ No - A characteristic noise: rumbling or rolling?

### Did many residents perceive

- ☒ **Yes** | ☐ No - A clear shaking of the building?  
☐ Yes | ☒ **No** - A loud rumble?

### Have we witnessed

- ☒ **Yes** | ☐ No - The oscillation of chandeliers or freely suspended objects?  
☐ Yes | ☒ **No** - Swinging chairs or beds?  
☐ Yes | ☒ **No** - Cracking ceilings?  
☐ Yes | ☒ **No** - Sleepers waking up?

### Has it been witnessed or later observed

- ☒ **Yes** | ☐ No - The shivering of windows and doors?  
☒ **Yes** | ☐ No - The shaking of movable objects (tables, vases, knick-knacks, ...)?

### Has it been witnessed or later observed

- ☒ **Yes** | ☐ No - The clattering of glasses and dishes in buffets?  
☒ **Yes** | ☐ No - The swaying of frames hanging on the wall?  
☐ Yes | ☒ **No** - The creaking of floors?  
☒ **Yes** | ☐ No - Small fragments of plaster falling from ceilings?  
☒ **Yes** | ☐ No - A confusion of the inhabitants (people leaving the house).

### Has it been observed

- ☒ **Yes** | ☐ No - Moving knick-knacks?  
☒ **Yes** | ☐ No - Moving light objects?  
 Which ones?:  
☐ Yes | ☒ **No** - The falling of frames hanging on the wall?  
☐ Yes | ☒ **No** - The falling of light objects placed on polished furniture or marble  
☐ Yes | ☒ **No** - Cracked or broken windows?  
☐ Yes | ☒ **No** - Broken crockery?  
☐ Yes | ☒ **No** - Light objects (vases, flower pots, etc.) spilled?  
☐ Yes | ☒ **No** - Has light furniture moved?  
☒ **Yes** | ☐ No - Has heavy furniture (chests, stoves, ...) vibrated?  
☐ Yes | ☒ **No** - Did bells tinkle?  
☐ Yes | ☒ **No** - Did heavy furniture move?  
☐ Yes | ☒ **No** - Did light furniture tip over?  
☐ Yes | ☒ **No** - Have doors been moved on their hinges?

### Has it been observed

- ☐ Yes | ☒ **No** - Falling pieces of plaster from the ceilings?  
☐ Yes | ☒ **No** - Cracks in wall plaster?  
☐ Yes | ☒ **No** - An exceptional fall of a chimney in poor condition?  
☐ Yes | ☒ **No** - An exceptional fall of some bricks?  
☐ Yes | ☒ **No** - Have there been several damaged chimneys?

How many?:

- ☐ Yes | ☒ **No** - Have there been several chimneys overturned?

How many?:

% for the municipality?:

- ☐ Yes | ☒ **No** - Have there been any falls of façade ornaments?

How important?:

- ☐ Yes | ☒ **No** - Have there been deep cracks in the brick walls?  
☐ Yes | ☒ **No** - Have there been deep cracks in the concrete walls?  
☐ Yes | ☒ **No** - Have there been landslides along the banks or slopes?

Importance:

ADDITIONAL COMMENTS:

## Official inquiry for WASMES (BE)

Location: 50.422°N 3.847°E, at 1.9 km from the epicentre.

**Imin: 4 - Imax: 4**

### Did some residents perceive

- ☐ Yes | ☒ **No** - Light vibrations?  
☐ Yes | ☒ **No** - A characteristic noise: rumbling or rolling?

### Did many residents perceive

- ☐ Yes | ☒ **No** - A clear shaking of the building?  
☒ **Yes** | ☐ No - A loud rumble?

### Have we witnessed

- ☐ Yes | ☒ **No** - The oscillation of chandeliers or freely suspended objects?  
☐ Yes | ☒ **No** - Swinging chairs or beds?  
☐ Yes | ☒ **No** - Cracking ceilings?  
☒ **Yes** | ☐ No - Sleepers waking up?

### Has it been witnessed or later observed

- ☐ Yes | ☒ **No** - The shivering of windows and doors?  
☐ Yes | ☒ **No** - The shaking of movable objects (tables, vases, knick-knacks, ...)?

### Has it been witnessed or later observed

- ☐ Yes | ☒ **No** - The clattering of glasses and dishes in buffets?  
☐ Yes | ☒ **No** - The swaying of frames hanging on the wall?  
☐ Yes | ☒ **No** - The creaking of floors?  
☐ Yes | ☒ **No** - Small fragments of plaster falling from ceilings?  
☒ **Yes** | ☐ No - A confusion of the inhabitants (people leaving the house).

### Has it been observed

- ☐ Yes | ☒ **No** - Moving knick-knacks?  
☐ Yes | ☒ **No** - Moving light objects?  
 Which ones?:  
☐ Yes | ☒ **No** - The falling of frames hanging on the wall?  
☐ Yes | ☒ **No** - The falling of light objects placed on polished furniture or marble  
☐ Yes | ☒ **No** - Cracked or broken windows?  
☐ Yes | ☒ **No** - Broken crockery?  
☐ Yes | ☒ **No** - Light objects (vases, flower pots, etc.) spilled?  
☒ **Yes** | ☐ No - Has light furniture moved?  
☐ Yes | ☒ **No** - Has heavy furniture (chests, stoves, ...) vibrated?  
☐ Yes | ☒ **No** - Did bells tinkle?  
☐ Yes | ☒ **No** - Did heavy furniture move?  
☐ Yes | ☒ **No** - Did light furniture tip over?  
☐ Yes | ☒ **No** - Have doors been moved on their hinges?

### Has it been observed

- ☐ Yes | ☒ **No** - Falling pieces of plaster from the ceilings?  
☐ Yes | ☒ **No** - Cracks in wall plaster?  
☐ Yes | ☒ **No** - An exceptional fall of a chimney in poor condition?  
☒ **Yes** | ☐ No - An exceptional fall of some bricks?  
☐ Yes | ☒ **No** - Have there been several damaged chimneys?

How many?:

- ☐ Yes | ☒ **No** - Have there been several chimneys overturned?

How many?:

% for the municipality?:

- ☐ Yes | ☒ **No** - Have there been any falls of façade ornaments?

How important?:

- ☐ Yes | ☒ **No** - Have there been deep cracks in the brick walls?  
☐ Yes | ☒ **No** - Have there been deep cracks in the concrete walls?  
☐ Yes | ☒ **No** - Have there been landslides along the banks or slopes?

Importance:

ADDITIONAL COMMENTS:

## Official inquiry for WASMUEL (BE)

Location: 50.446°N 3.848°E, at 2.4 km from the epicentre.

**Imin: 4 - Imax: 5**

### Did some residents perceive

- ☐ Yes | ☒ **No** - Light vibrations?  
☒ **Yes** | ☐ No - A characteristic noise: rumbling or rolling?

### Did many residents perceive

- ☐ Yes | ☒ **No** - A clear shaking of the building?  
☒ **Yes** | ☐ No - A loud rumble?

### Have we witnessed

- ☒ **Yes** | ☐ No - The oscillation of chandeliers or freely suspended objects?  
☒ **Yes** | ☐ No - Swinging chairs or beds?  
☐ Yes | ☒ **No** - Cracking ceilings?  
☒ **Yes** | ☐ No - Sleepers waking up?

### Has it been witnessed or later observed

- ☒ **Yes** | ☐ No - The shivering of windows and doors?  
☒ **Yes** | ☐ No - The shaking of movable objects (tables, vases, knick-knacks, ...)?

### Has it been witnessed or later observed

- ☐ Yes | ☒ **No** - The clattering of glasses and dishes in buffets?  
☒ **Yes** | ☐ No - The swaying of frames hanging on the wall?  
☐ Yes | ☒ **No** - The creaking of floors?  
☐ Yes | ☒ **No** - Small fragments of plaster falling from ceilings?  
☒ **Yes** | ☐ No - A confusion of the inhabitants (people leaving the house).

### Has it been observed

- ☐ Yes | ☒ **No** - Moving knick-knacks?  
☐ Yes | ☒ **No** - Moving light objects?  
 Which ones?:  
☐ Yes | ☒ **No** - The falling of frames hanging on the wall?  
☐ Yes | ☒ **No** - The falling of light objects placed on polished furniture or marble  
☐ Yes | ☒ **No** - Cracked or broken windows?  
☐ Yes | ☒ **No** - Broken crockery?  
☐ Yes | ☒ **No** - Light objects (vases, flower pots, etc.) spilled?  
☐ Yes | ☒ **No** - Has light furniture moved?  
☐ Yes | ☒ **No** - Has heavy furniture (chests, stoves, ...) vibrated?  
☐ Yes | ☒ **No** - Did bells tinkle?  
☐ Yes | ☒ **No** - Did heavy furniture move?  
☐ Yes | ☒ **No** - Did light furniture tip over?  
☐ Yes | ☒ **No** - Have doors been moved on their hinges?

### Has it been observed

- ☒ **Yes** | ☐ No - Falling pieces of plaster from the ceilings?  
☐ Yes | ☒ **No** - Cracks in wall plaster?  
☐ Yes | ☒ **No** - An exceptional fall of a chimney in poor condition?  
☐ Yes | ☒ **No** - An exceptional fall of some bricks?  
☐ Yes | ☒ **No** - Have there been several damaged chimneys?

How many?:

- ☐ Yes | ☒ **No** - Have there been several chimneys overturned?

How many?:

% for the municipality?:

- ☐ Yes | ☒ **No** - Have there been any falls of façade ornaments?

How important?:

- ☐ Yes | ☒ **No** - Have there been deep cracks in the brick walls?  
☐ Yes | ☒ **No** - Have there been deep cracks in the concrete walls?  
☐ Yes | ☒ **No** - Have there been landslides along the banks or slopes?

Importance:

ADDITIONAL COMMENTS:

## Official inquiry for WAUDREZ (BE)

Location: 50.413°N 4.152°E, at 20.1 km from the epicentre.

**Imin: 2 - Imax: 2**

### Did some residents perceive

- ☒ **Yes** | ☐ **No** - Light vibrations?  
☐ **Yes** | ☒ **No** - A characteristic noise: rumbling or rolling?

### Did many residents perceive

- ☐ **Yes** | ☒ **No** - A clear shaking of the building?  
☐ **Yes** | ☒ **No** - A loud rumble?

### Have we witnessed

- ☐ **Yes** | ☒ **No** - The oscillation of chandeliers or freely suspended objects?  
☐ **Yes** | ☒ **No** - Swinging chairs or beds?  
☐ **Yes** | ☒ **No** - Cracking ceilings?  
☐ **Yes** | ☒ **No** - Sleepers waking up?

### Has it been witnessed or later observed

- ☐ **Yes** | ☒ **No** - The shivering of windows and doors?  
☐ **Yes** | ☒ **No** - The shaking of movable objects (tables, vases, knick-knacks, ...)?

### Has it been witnessed or later observed

- ☐ **Yes** | ☒ **No** - The clattering of glasses and dishes in buffets?  
☐ **Yes** | ☒ **No** - The swaying of frames hanging on the wall?  
☐ **Yes** | ☒ **No** - The creaking of floors?  
☐ **Yes** | ☒ **No** - Small fragments of plaster falling from ceilings?  
☐ **Yes** | ☒ **No** - A confusion of the inhabitants (people leaving the house).

### Has it been observed

- ☐ **Yes** | ☒ **No** - Moving knick-knacks?  
☐ **Yes** | ☒ **No** - Moving light objects?  
 Which ones?:  
☐ **Yes** | ☒ **No** - The falling of frames hanging on the wall?  
☐ **Yes** | ☒ **No** - The falling of light objects placed on polished furniture or marble  
☐ **Yes** | ☒ **No** - Cracked or broken windows?  
☐ **Yes** | ☒ **No** - Broken crockery?  
☐ **Yes** | ☒ **No** - Light objects (vases, flower pots, etc.) spilled?  
☐ **Yes** | ☒ **No** - Has light furniture moved?  
☐ **Yes** | ☒ **No** - Has heavy furniture (chests, stoves, ...) vibrated?  
☐ **Yes** | ☒ **No** - Did bells tinkle?  
☐ **Yes** | ☒ **No** - Did heavy furniture move?  
☐ **Yes** | ☒ **No** - Did light furniture tip over?  
☐ **Yes** | ☒ **No** - Have doors been moved on their hinges?

### Has it been observed

- ☐ **Yes** | ☒ **No** - Falling pieces of plaster from the ceilings?  
☐ **Yes** | ☒ **No** - Cracks in wall plaster?  
☐ **Yes** | ☒ **No** - An exceptional fall of a chimney in poor condition?  
☐ **Yes** | ☒ **No** - An exceptional fall of some bricks?  
☐ **Yes** | ☒ **No** - Have there been several damaged chimneys?

How many?:

- ☐ **Yes** | ☒ **No** - Have there been several chimneys overturned?

How many?:

% for the municipality?:

- ☐ **Yes** | ☒ **No** - Have there been any falls of façade ornaments?

How important?:

- ☐ **Yes** | ☒ **No** - Have there been deep cracks in the brick walls?  
☐ **Yes** | ☒ **No** - Have there been deep cracks in the concrete walls?  
☐ **Yes** | ☒ **No** - Have there been landslides along the banks or slopes?

Importance:

ADDITIONAL COMMENTS:
