# Supplementary material for: The damaging character of shallow 20th century earthquakes in the Hainaut coal area (Belgium)
Source: Copernicus journal article supplement (doi:10.5194/se-2021-74), 2021-07-13
Supplement: Supplementary file 1 [file se-2021-74-supplement.zip › 562_1954-07-10_FLENU.csv]

Imin	Imax	lat	lon	Commune	d_epi	azimuth
2	2	50.3594	3.9469	QUEVY-LE-GRAND	9.56571058074	159.580450729
2	2	50.3619	3.9856	HAVAY	10.607224011	144.954417141
2	2	50.3669	3.9394	QUEVY-LE-PETIT	8.60035100096	160.977051017
2	2	50.4011	3.8225	WARQUIGNIES	7.00427549369	231.875424741
2	2	50.4028	3.9586	ASQUILLIES	5.87082354029	134.794465503
2	2	50.4119	4.1058	ESTINNES-AU-VAL	14.9545266894	101.985485275
2	2	50.4308	3.7675	HAININ	9.46908100662	263.846634046
2	2	50.4556	4.1025	MAURAGE	14.4873904926	83.0425023516
2	2	50.5131	4.0161	CASTEAU	11.5775918477	45.3394432429
2	2	49.9817	4.9375	GEDINNE	89.9065638742	124.142141603
3	3	50.3397	3.9444	GOEGNIES-CHAUSSEE	11.5952107092	164.181204849
4	4	50.3869	3.9419	BOUGNIES	6.61503402827	153.226147906
2	2	50.3956	3.9878	HARVENG	7.95818248138	128.326846821
3	3	50.4222	3.8467	WASMES	4.2734827871	242.418467307
3	3	50.447	3.821	SAINT-GHISLAIN	5.6654547067	277.930221506
3	3	50.4664	4.0467	HAVRE	10.8245334548	74.201912788
4	4	50.4747	4.0081	OBOURG	8.59235024179	63.2639450554
3	3	50.515	3.8978	ERBISOEUL	8.34433043642	358.928503752
3	3	50.5369	3.9594	MASNUY-SAINT-PIERRE	11.5739697607	21.3364283995
3	3	50.5997	3.9406	LOMBISE	17.9967079265	9.19080021892
3	4	50.4733	3.9594	NIMY	5.61381387095	48.6894102746
4	4	50.4053	3.8758	LA BOUVERIE	4.2257195594	204.024528145
4	4	50.4125	3.9689	NOUVELLES	5.77310042172	121.970488284
4	4	50.4136	3.8622	PATURAGES	3.97979432099	222.462293395
4	4	50.4258	3.9875	SPIENNES	6.41439643476	104.222226015
4	4	50.4381	4.0072	SAINT-SYMPHORIEN	7.618495709	91.5483723286
4	4	50.4675	3.8119	TERTRE	6.96452502074	296.08882435
4	4	50.4847	3.8356	BAUDOUR	6.75532403238	317.421849478
4	5	50.3903	3.8883	EUGIES	5.59067607544	188.558813412
5	5	50.3931	3.9194	GENLY	5.39615570089	165.187933998
4	5	50.4017	3.9331	NOIRCHAIN	4.86666331583	151.082181519
5	5	50.4342	3.8292	HORNU	5.07109796845	262.717948117
5	5	50.4381	3.92	CUESMES	1.43644783055	98.453203242
5	5	50.4414	3.9664	HYON	4.71950913512	88.0834366292
5	5	50.445	3.803	BOUSSU	6.91285844899	274.652226409
5	5	50.4458	3.8478	WASMUEL	3.76373459109	279.890491921
5	5	50.4494	3.8878	JEMAPPES	1.35806259776	320.35366307
5	5	50.455	3.948	MONS	3.79575496441	63.9039536329
5	5	50.4106	3.8942	FRAMERIES	3.2962441992	187.185180253
5	5	50.4203	3.9447	CIPLY	3.85873478215	124.586688123
5	5	50.4272	3.9608	MESVIN	4.54837755385	108.219289078
5	6	50.4431	3.8653	QUAREGNON	2.48898619931	277.977033069
5	5	50.4494	3.8878	FLENU	1.35806259776	320.35366307
5	6	50.4781	3.9025	GHLIN	4.24188042404	2.39762214454
