# Supplementary material for: The damaging character of shallow 20th century earthquakes in the Hainaut coal area (Belgium)
Source: Copernicus journal article supplement (doi:10.5194/se-2021-74), 2021-07-13
Supplement: Supplementary file 1 [file se-2021-74-supplement.zip › 562_ROB_official_report.pdf]

# Royal Observatory of Belgium Official Macroseismic Inquiry

**FLENU**

1954-07-10 17:18:21

Magnitude  $M_w=3.5$

50.44°N 3.9°E 3.3 km

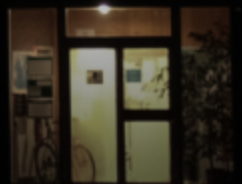



# Official Inquiries

|                            | Country | Latitude | Longitude | Epicentral Distance | Imin | Imax |
|----------------------------|---------|----------|-----------|---------------------|------|------|
| <b>ASQUILLIES</b>          | BE      | 50.403   | 3.959     | 5.9                 | 2    | 2    |
| <b>BAUDOUR</b>             | BE      | 50.485   | 3.836     | 6.8                 | 4    | 4    |
| <b>BOUGNIES</b>            | BE      | 50.387   | 3.942     | 6.6                 | 4    | 4    |
| <b>BOUSSU</b>              | BE      | 50.445   | 3.803     | 6.9                 | 5    | 5    |
| <b>CASTEAU</b>             | BE      | 50.513   | 4.016     | 11.6                | 2    | 2    |
| <b>CIPLY</b>               | BE      | 50.42    | 3.945     | 3.9                 | 5    | 5    |
| <b>CUESMES</b>             | BE      | 50.438   | 3.92      | 1.4                 | 5    | 5    |
| <b>ERBISOEUL</b>           | BE      | 50.515   | 3.898     | 8.3                 | 3    | 3    |
| <b>ESTINNES-AU-VAL</b>     | BE      | 50.412   | 4.106     | 15                  | 2    | 2    |
| <b>EUGIES</b>              | BE      | 50.39    | 3.888     | 5.6                 | 4    | 5    |
| <b>FLENU</b>               | BE      | 50.449   | 3.888     | 1.4                 | 5    | 5    |
| <b>FRAMERIES</b>           | BE      | 50.411   | 3.894     | 3.3                 | 5    | 5    |
| <b>GENLY</b>               | BE      | 50.393   | 3.919     | 5.4                 | 5    | 5    |
| <b>GHLIN</b>               | BE      | 50.478   | 3.902     | 4.2                 | 5    | 6    |
| <b>HAININ</b>              | BE      | 50.431   | 3.768     | 9.5                 | 2    | 2    |
| <b>HARVENG</b>             | BE      | 50.396   | 3.988     | 8                   | 2    | 2    |
| <b>HAVAY</b>               | BE      | 50.362   | 3.986     | 10.6                | 2    | 2    |
| <b>HAVRE</b>               | BE      | 50.466   | 4.047     | 10.8                | 3    | 3    |
| <b>HORNU</b>               | BE      | 50.434   | 3.829     | 5.1                 | 5    | 5    |
| <b>HYON</b>                | BE      | 50.441   | 3.966     | 4.7                 | 5    | 5    |
| <b>LA BOUVERIE</b>         | BE      | 50.405   | 3.876     | 4.2                 | 4    | 4    |
| <b>LOMBISE</b>             | BE      | 50.6     | 3.941     | 18                  | 3    | 3    |
| <b>MASNUY-SAINT-PIERRE</b> | BE      | 50.537   | 3.959     | 11.6                | 3    | 3    |
| <b>MAURAGE</b>             | BE      | 50.456   | 4.102     | 14.5                | 2    | 2    |
| <b>MESVIN</b>              | BE      | 50.427   | 3.961     | 4.5                 | 5    | 5    |
| <b>MONS</b>                | BE      | 50.455   | 3.948     | 3.8                 | 5    | 5    |
| <b>NIMY</b>                | BE      | 50.473   | 3.959     | 5.6                 | 3    | 4    |
| <b>NOIRCHAIN</b>           | BE      | 50.402   | 3.933     | 4.9                 | 4    | 5    |
| <b>NOUVELLES</b>           | BE      | 50.412   | 3.969     | 5.8                 | 4    | 4    |
| <b>OBOURG</b>              | BE      | 50.475   | 4.008     | 8.6                 | 4    | 4    |
| <b>PATURAGES</b>           | BE      | 50.414   | 3.862     | 4                   | 4    | 4    |
| <b>QUAREGNON</b>           | BE      | 50.443   | 3.865     | 2.5                 | 5    | 6    |
| <b>QUEVY-LE-GRAND</b>      | BE      | 50.359   | 3.947     | 9.6                 | 2    | 2    |
| <b>QUEVY-LE-PETIT</b>      | BE      | 50.367   | 3.939     | 8.6                 | 2    | 2    |
| <b>SAINT-GHISLAIN</b>      | BE      | 50.447   | 3.821     | 5.7                 | 3    | 3    |
| <b>SAINT-SYMPHORIEN</b>    | BE      | 50.438   | 4.007     | 7.6                 | 4    | 4    |
| <b>SPIENNES</b>            | BE      | 50.426   | 3.988     | 6.4                 | 4    | 4    |
| <b>TERTRE</b>              | BE      | 50.468   | 3.812     | 7                   | 4    | 4    |
| <b>WARQUIGNIES</b>         | BE      | 50.401   | 3.822     | 7                   | 2    | 2    |
| <b>WASMES</b>              | BE      | 50.422   | 3.847     | 4.3                 | 3    | 3    |
| <b>WASMUEL</b>             | BE      | 50.446   | 3.848     | 3.8                 | 5    | 5    |



# Additional Intensities from other sources

|           | <b>Imin</b> | <b>Imax</b> | <b>Latitude</b> | <b>Longitude</b> | <b>Commune</b>    | <b>Epicentral Distance</b> |
|-----------|-------------|-------------|-----------------|------------------|-------------------|----------------------------|
| <b>9</b>  | 2           | 2           | 49.982          | 4.938            | GEDINNE           | 89.9                       |
| <b>10</b> | 3           | 3           | 50.340          | 3.944            | GOEGNIES-CHAUSSEE | 11.6                       |
| <b>36</b> | 5           | 5           | 50.449          | 3.888            | JEMAPPES          | 1.4                        |

# Individual Formulaires

## Official inquiry for ASQUILLIES (BE)

Location: 50.403°N 3.959°E, at 5.9 km from the epicentre.

**Imin: 2 - Imax: 2**

### Did some residents perceive

- ☒ **Yes** | ☐ No - Light vibrations?  
☒ **Yes** | ☐ No - A characteristic noise: rumbling or rolling?

### Did many residents perceive

- ☐ Yes | ☒ **No** - A clear shaking of the building?  
☐ Yes | ☒ **No** - A loud rumble?

### Have we witnessed

- ☐ Yes | ☒ **No** - The oscillation of chandeliers or freely suspended objects?  
☐ Yes | ☒ **No** - Swinging chairs or beds?  
☐ Yes | ☒ **No** - Cracking ceilings?  
☐ Yes | ☒ **No** - Sleepers waking up?

### Has it been witnessed or later observed

- ☐ Yes | ☒ **No** - The shivering of windows and doors?  
☐ Yes | ☒ **No** - The shaking of movable objects (tables, vases, knick-knacks, ...)?

### Has it been witnessed or later observed

- ☐ Yes | ☒ **No** - The clattering of glasses and dishes in buffets?  
☐ Yes | ☒ **No** - The swaying of frames hanging on the wall?  
☐ Yes | ☒ **No** - The creaking of floors?  
☐ Yes | ☒ **No** - Small fragments of plaster falling from ceilings?  
☐ Yes | ☒ **No** - A confusion of the inhabitants (people leaving the house).

### Has it been observed

- ☐ Yes | ☒ **No** - Moving knick-knacks?  
☐ Yes | ☒ **No** - Moving light objects?  
 Which ones?:  
☐ Yes | ☒ **No** - The falling of frames hanging on the wall?  
☐ Yes | ☒ **No** - The falling of light objects placed on polished furniture or marble  
☐ Yes | ☒ **No** - Cracked or broken windows?  
☐ Yes | ☒ **No** - Broken crockery?  
☐ Yes | ☒ **No** - Light objects (vases, flower pots, etc.) spilled?  
☐ Yes | ☒ **No** - Has light furniture moved?  
☐ Yes | ☒ **No** - Has heavy furniture (chests, stoves, ...) vibrated?  
☐ Yes | ☒ **No** - Did bells tinkle?  
☐ Yes | ☒ **No** - Did heavy furniture move?  
☐ Yes | ☒ **No** - Did light furniture tip over?  
☐ Yes | ☒ **No** - Have doors been moved on their hinges?

### Has it been observed

- ☐ Yes | ☒ **No** - Falling pieces of plaster from the ceilings?  
☐ Yes | ☒ **No** - Cracks in wall plaster?  
☐ Yes | ☒ **No** - An exceptional fall of a chimney in poor condition?  
☐ Yes | ☒ **No** - An exceptional fall of some bricks?  
☐ Yes | ☒ **No** - Have there been several damaged chimneys?

How many?:

- ☐ Yes | ☒ **No** - Have there been several chimneys overturned?

How many?:

% for the municipality?:

- ☐ Yes | ☒ **No** - Have there been any falls of façade ornaments?

How important?:

- ☐ Yes | ☒ **No** - Have there been deep cracks in the brick walls?  
☐ Yes | ☒ **No** - Have there been deep cracks in the concrete walls?  
☐ Yes | ☒ **No** - Have there been landslides along the banks or slopes?

Importance:

ADDITIONAL COMMENTS:

## Official inquiry for BAUDOUR (BE)

Location: 50.485°N 3.836°E, at 6.8 km from the epicentre.

**Imin: 4 - Imax: 4**

### Did some residents perceive

- ☒ **Yes** | ☐ No - Light vibrations?  
☒ **Yes** | ☐ No - A characteristic noise: rumbling or rolling?

### Did many residents perceive

- ☒ **Yes** | ☐ No - A clear shaking of the building?  
☐ Yes | ☒ **No** - A loud rumble?

### Have we witnessed

- ☐ Yes | ☒ **No** - The oscillation of chandeliers or freely suspended objects?  
☐ Yes | ☒ **No** - Swinging chairs or beds?  
☐ Yes | ☒ **No** - Cracking ceilings?  
☒ **Yes** | ☐ No - Sleepers waking up?

### Has it been witnessed or later observed

- ☒ **Yes** | ☐ No - The shivering of windows and doors?  
☒ **Yes** | ☐ No - The shaking of movable objects (tables, vases, knick-knacks, ...)?

### Has it been witnessed or later observed

- ☒ **Yes** | ☐ No - The clattering of glasses and dishes in buffets?  
☐ Yes | ☒ **No** - The swaying of frames hanging on the wall?  
☐ Yes | ☒ **No** - The creaking of floors?  
☐ Yes | ☒ **No** - Small fragments of plaster falling from ceilings?  
☐ Yes | ☒ **No** - A confusion of the inhabitants (people leaving the house).

### Has it been observed

- ☐ Yes | ☒ **No** - Moving knick-knacks?  
☐ Yes | ☒ **No** - Moving light objects?  
 Which ones?:  
☐ Yes | ☒ **No** - The falling of frames hanging on the wall?  
☐ Yes | ☒ **No** - The falling of light objects placed on polished furniture or marble  
☐ Yes | ☒ **No** - Cracked or broken windows?  
☐ Yes | ☒ **No** - Broken crockery?  
☐ Yes | ☒ **No** - Light objects (vases, flower pots, etc.) spilled?  
☐ Yes | ☒ **No** - Has light furniture moved?  
☐ Yes | ☒ **No** - Has heavy furniture (chests, stoves, ...) vibrated?  
☐ Yes | ☒ **No** - Did bells tinkle?  
☐ Yes | ☒ **No** - Did heavy furniture move?  
☐ Yes | ☒ **No** - Did light furniture tip over?  
☐ Yes | ☒ **No** - Have doors been moved on their hinges?

### Has it been observed

- ☐ Yes | ☒ **No** - Falling pieces of plaster from the ceilings?  
☐ Yes | ☒ **No** - Cracks in wall plaster?  
☐ Yes | ☒ **No** - An exceptional fall of a chimney in poor condition?  
☐ Yes | ☒ **No** - An exceptional fall of some bricks?  
☐ Yes | ☒ **No** - Have there been several damaged chimneys?

How many?:

- ☐ Yes | ☒ **No** - Have there been several chimneys overturned?

How many?:

% for the municipality?:

- ☐ Yes | ☒ **No** - Have there been any falls of façade ornaments?

How important?:

- ☐ Yes | ☒ **No** - Have there been deep cracks in the brick walls?  
☐ Yes | ☒ **No** - Have there been deep cracks in the concrete walls?  
☐ Yes | ☒ **No** - Have there been landslides along the banks or slopes?

Importance:

ADDITIONAL COMMENTS:

## Official inquiry for BOUGNIES (BE)

Location: 50.387°N 3.942°E, at 6.6 km from the epicentre.

**Imin: 4 - Imax: 4**

### Did some residents perceive

- ☒ **Yes** | ☐ No - Light vibrations?  
☒ **Yes** | ☐ No - A characteristic noise: rumbling or rolling?

### Did many residents perceive

- ☒ **Yes** | ☐ No - A clear shaking of the building?  
☐ Yes | ☒ **No** - A loud rumble?

### Have we witnessed

- ☐ Yes | ☒ **No** - The oscillation of chandeliers or freely suspended objects?  
☐ Yes | ☒ **No** - Swinging chairs or beds?  
☐ Yes | ☒ **No** - Cracking ceilings?  
☐ Yes | ☒ **No** - Sleepers waking up?

### Has it been witnessed or later observed

- ☐ Yes | ☒ **No** - The shivering of windows and doors?  
☐ Yes | ☒ **No** - The shaking of movable objects (tables, vases, knick-knacks, ...)?

### Has it been witnessed or later observed

- ☐ Yes | ☒ **No** - The clattering of glasses and dishes in buffets?  
☐ Yes | ☒ **No** - The swaying of frames hanging on the wall?  
☐ Yes | ☒ **No** - The creaking of floors?  
☐ Yes | ☒ **No** - Small fragments of plaster falling from ceilings?  
☐ Yes | ☒ **No** - A confusion of the inhabitants (people leaving the house).

### Has it been observed

- ☐ Yes | ☒ **No** - Moving knick-knacks?  
☐ Yes | ☒ **No** - Moving light objects?  
 Which ones?:  
☐ Yes | ☒ **No** - The falling of frames hanging on the wall?  
☐ Yes | ☒ **No** - The falling of light objects placed on polished furniture or marble  
☐ Yes | ☒ **No** - Cracked or broken windows?  
☐ Yes | ☒ **No** - Broken crockery?  
☐ Yes | ☒ **No** - Light objects (vases, flower pots, etc.) spilled?  
☐ Yes | ☒ **No** - Has light furniture moved?  
☐ Yes | ☒ **No** - Has heavy furniture (chests, stoves, ...) vibrated?  
☐ Yes | ☒ **No** - Did bells tinkle?  
☐ Yes | ☒ **No** - Did heavy furniture move?  
☐ Yes | ☒ **No** - Did light furniture tip over?  
☐ Yes | ☒ **No** - Have doors been moved on their hinges?

### Has it been observed

- ☐ Yes | ☒ **No** - Falling pieces of plaster from the ceilings?  
☐ Yes | ☒ **No** - Cracks in wall plaster?  
☐ Yes | ☒ **No** - An exceptional fall of a chimney in poor condition?  
☐ Yes | ☒ **No** - An exceptional fall of some bricks?  
☐ Yes | ☒ **No** - Have there been several damaged chimneys?

How many?:

- ☐ Yes | ☒ **No** - Have there been several chimneys overturned?

How many?:

% for the municipality?:

- ☐ Yes | ☒ **No** - Have there been any falls of façade ornaments?

How important?:

- ☐ Yes | ☒ **No** - Have there been deep cracks in the brick walls?  
☐ Yes | ☒ **No** - Have there been deep cracks in the concrete walls?  
☐ Yes | ☒ **No** - Have there been landslides along the banks or slopes?

Importance:

ADDITIONAL COMMENTS:

## Official inquiry for BOUSSU (BE)

Location: 50.445°N 3.803°E, at 6.9 km from the epicentre.

**Imin: 5 - Imax: 5**

### Did some residents perceive

- ☒ **Yes** | ☐ No - Light vibrations?  
☒ **Yes** | ☐ No - A characteristic noise: rumbling or rolling?

### Did many residents perceive

- ☒ **Yes** | ☐ No - A clear shaking of the building?  
☒ **Yes** | ☐ No - A loud rumble?

### Have we witnessed

- ☐ Yes | ☒ **No** - The oscillation of chandeliers or freely suspended objects?  
☐ Yes | ☒ **No** - Swinging chairs or beds?  
☐ Yes | ☒ **No** - Cracking ceilings?  
☐ Yes | ☒ **No** - Sleepers waking up?

### Has it been witnessed or later observed

- ☐ Yes | ☒ **No** - The shivering of windows and doors?  
☐ Yes | ☒ **No** - The shaking of movable objects (tables, vases, knick-knacks, ...)?

### Has it been witnessed or later observed

- ☐ Yes | ☒ **No** - The clattering of glasses and dishes in buffets?  
☐ Yes | ☒ **No** - The swaying of frames hanging on the wall?  
☐ Yes | ☒ **No** - The creaking of floors?  
☐ Yes | ☒ **No** - Small fragments of plaster falling from ceilings?  
☒ **Yes** | ☐ No - A confusion of the inhabitants (people leaving the house).

### Has it been observed

- ☐ Yes | ☒ **No** - Moving knick-knacks?  
☐ Yes | ☒ **No** - Moving light objects?  
 Which ones?:  
☐ Yes | ☒ **No** - The falling of frames hanging on the wall?  
☐ Yes | ☒ **No** - The falling of light objects placed on polished furniture or marble  
☐ Yes | ☒ **No** - Cracked or broken windows?  
☐ Yes | ☒ **No** - Broken crockery?  
☐ Yes | ☒ **No** - Light objects (vases, flower pots, etc.) spilled?  
☐ Yes | ☒ **No** - Has light furniture moved?  
☐ Yes | ☒ **No** - Has heavy furniture (chests, stoves, ...) vibrated?  
☐ Yes | ☒ **No** - Did bells tinkle?  
☐ Yes | ☒ **No** - Did heavy furniture move?  
☐ Yes | ☒ **No** - Did light furniture tip over?  
☐ Yes | ☒ **No** - Have doors been moved on their hinges?

### Has it been observed

- ☐ Yes | ☒ **No** - Falling pieces of plaster from the ceilings?  
☐ Yes | ☒ **No** - Cracks in wall plaster?  
☐ Yes | ☒ **No** - An exceptional fall of a chimney in poor condition?  
☐ Yes | ☒ **No** - An exceptional fall of some bricks?  
☐ Yes | ☒ **No** - Have there been several damaged chimneys?

How many?:

- ☒ **Yes** | ☐ No - Have there been several chimneys overturned?

How many?: **2.0**

% for the municipality?: **2/3500**

- ☐ Yes | ☒ **No** - Have there been any falls of façade ornaments?

How important?:

- ☐ Yes | ☒ **No** - Have there been deep cracks in the brick walls?  
☐ Yes | ☒ **No** - Have there been deep cracks in the concrete walls?  
☐ Yes | ☒ **No** - Have there been landslides along the banks or slopes?

Importance:

ADDITIONAL COMMENTS:

## Official inquiry for CASTEAU (BE)

Location: 50.513°N 4.016°E, at 11.6 km from the epicentre.

**Imin: 2 - Imax: 2**

### Did some residents perceive

- ☒ **Yes** | ☐ **No** - Light vibrations?  
☐ **Yes** | ☒ **No** - A characteristic noise: rumbling or rolling?

### Did many residents perceive

- ☐ **Yes** | ☒ **No** - A clear shaking of the building?  
☐ **Yes** | ☒ **No** - A loud rumble?

### Have we witnessed

- ☐ **Yes** | ☒ **No** - The oscillation of chandeliers or freely suspended objects?  
☐ **Yes** | ☒ **No** - Swinging chairs or beds?  
☐ **Yes** | ☒ **No** - Cracking ceilings?  
☐ **Yes** | ☒ **No** - Sleepers waking up?

### Has it been witnessed or later observed

- ☐ **Yes** | ☒ **No** - The shivering of windows and doors?  
☐ **Yes** | ☒ **No** - The shaking of movable objects (tables, vases, knick-knacks, ...)?

### Has it been witnessed or later observed

- ☐ **Yes** | ☒ **No** - The clattering of glasses and dishes in buffets?  
☐ **Yes** | ☒ **No** - The swaying of frames hanging on the wall?  
☐ **Yes** | ☒ **No** - The creaking of floors?  
☐ **Yes** | ☒ **No** - Small fragments of plaster falling from ceilings?  
☐ **Yes** | ☒ **No** - A confusion of the inhabitants (people leaving the house).

### Has it been observed

- ☐ **Yes** | ☒ **No** - Moving knick-knacks?  
☐ **Yes** | ☒ **No** - Moving light objects?  
 Which ones?:  
☐ **Yes** | ☒ **No** - The falling of frames hanging on the wall?  
☐ **Yes** | ☒ **No** - The falling of light objects placed on polished furniture or marble  
☐ **Yes** | ☒ **No** - Cracked or broken windows?  
☐ **Yes** | ☒ **No** - Broken crockery?  
☐ **Yes** | ☒ **No** - Light objects (vases, flower pots, etc.) spilled?  
☐ **Yes** | ☒ **No** - Has light furniture moved?  
☐ **Yes** | ☒ **No** - Has heavy furniture (chests, stoves, ...) vibrated?  
☐ **Yes** | ☒ **No** - Did bells tinkle?  
☐ **Yes** | ☒ **No** - Did heavy furniture move?  
☐ **Yes** | ☒ **No** - Did light furniture tip over?  
☐ **Yes** | ☒ **No** - Have doors been moved on their hinges?

### Has it been observed

- ☐ **Yes** | ☒ **No** - Falling pieces of plaster from the ceilings?  
☐ **Yes** | ☒ **No** - Cracks in wall plaster?  
☐ **Yes** | ☒ **No** - An exceptional fall of a chimney in poor condition?  
☐ **Yes** | ☒ **No** - An exceptional fall of some bricks?  
☐ **Yes** | ☒ **No** - Have there been several damaged chimneys?

How many?:

- ☐ **Yes** | ☒ **No** - Have there been several chimneys overturned?

How many?:

% for the municipality?:

- ☐ **Yes** | ☒ **No** - Have there been any falls of façade ornaments?

How important?:

- ☐ **Yes** | ☒ **No** - Have there been deep cracks in the brick walls?  
☐ **Yes** | ☒ **No** - Have there been deep cracks in the concrete walls?  
☐ **Yes** | ☒ **No** - Have there been landslides along the banks or slopes?

Importance:

ADDITIONAL COMMENTS:

## Official inquiry for CIPLY (BE)

Location: 50.42°N 3.945°E, at 3.9 km from the epicentre.

**Imin: 5 - Imax: 5**

### Did some residents perceive

- ☐ Yes | ☒ **No** - Light vibrations?  
☐ Yes | ☒ **No** - A characteristic noise: rumbling or rolling?

### Did many residents perceive

- ☒ **Yes** | ☐ No - A clear shaking of the building?  
☒ **Yes** | ☐ No - A loud rumble?

### Have we witnessed

- ☒ **Yes** | ☐ No - The oscillation of chandeliers or freely suspended objects?  
☒ **Yes** | ☐ No - Swinging chairs or beds?  
☐ Yes | ☒ **No** - Cracking ceilings?  
☐ Yes | ☒ **No** - Sleepers waking up?

### Has it been witnessed or later observed

- ☒ **Yes** | ☐ No - The shivering of windows and doors?  
☒ **Yes** | ☐ No - The shaking of movable objects (tables, vases, knick-knacks, ...)?

### Has it been witnessed or later observed

- ☐ Yes | ☒ **No** - The clattering of glasses and dishes in buffets?  
☐ Yes | ☒ **No** - The swaying of frames hanging on the wall?  
☐ Yes | ☒ **No** - The creaking of floors?  
☐ Yes | ☒ **No** - Small fragments of plaster falling from ceilings?  
☒ **Yes** | ☐ No - A confusion of the inhabitants (people leaving the house).

### Has it been observed

- ☐ Yes | ☒ **No** - Moving knick-knacks?  
☐ Yes | ☒ **No** - Moving light objects?  
 Which ones?:  
☐ Yes | ☒ **No** - The falling of frames hanging on the wall?  
☐ Yes | ☒ **No** - The falling of light objects placed on polished furniture or marble  
☐ Yes | ☒ **No** - Cracked or broken windows?  
☐ Yes | ☒ **No** - Broken crockery?  
☐ Yes | ☒ **No** - Light objects (vases, flower pots, etc.) spilled?  
☐ Yes | ☒ **No** - Has light furniture moved?  
☐ Yes | ☒ **No** - Has heavy furniture (chests, stoves, ...) vibrated?  
☐ Yes | ☒ **No** - Did bells tinkle?  
☐ Yes | ☒ **No** - Did heavy furniture move?  
☐ Yes | ☒ **No** - Did light furniture tip over?  
☐ Yes | ☒ **No** - Have doors been moved on their hinges?

### Has it been observed

- ☐ Yes | ☒ **No** - Falling pieces of plaster from the ceilings?  
☐ Yes | ☒ **No** - Cracks in wall plaster?  
☒ **Yes** | ☐ No - An exceptional fall of a chimney in poor condition?  
☒ **Yes** | ☐ No - An exceptional fall of some bricks?  
☒ **Yes** | ☐ No - Have there been several damaged chimneys?

How many?: **3 ou 4**

- ☐ Yes | ☒ **No** - Have there been several chimneys overturned?

How many?:

% for the municipality?:

- ☐ Yes | ☒ **No** - Have there been any falls of façade ornaments?

How important?:

- ☐ Yes | ☒ **No** - Have there been deep cracks in the brick walls?  
☐ Yes | ☒ **No** - Have there been deep cracks in the concrete walls?  
☐ Yes | ☒ **No** - Have there been landslides along the banks or slopes?

Importance:

ADDITIONAL COMMENTS:

## Official inquiry for CUESMES (BE)

Location: 50.438°N 3.92°E, at 1.4 km from the epicentre.

**Imin: 5 - Imax: 5**

### Did some residents perceive

- ☒ **Yes** | ☐ No - Light vibrations?  
☒ **Yes** | ☐ No - A characteristic noise: rumbling or rolling?

### Did many residents perceive

- ☒ **Yes** | ☐ No - A clear shaking of the building?  
☒ **Yes** | ☐ No - A loud rumble?

### Have we witnessed

- ☒ **Yes** | ☐ No - The oscillation of chandeliers or freely suspended objects?  
☒ **Yes** | ☐ No - Swinging chairs or beds?  
☐ Yes | ☒ **No** - Cracking ceilings?  
☐ Yes | ☒ **No** - Sleepers waking up?

### Has it been witnessed or later observed

- ☒ **Yes** | ☐ No - The shivering of windows and doors?  
☒ **Yes** | ☐ No - The shaking of movable objects (tables, vases, knick-knacks, ...)?

### Has it been witnessed or later observed

- ☐ Yes | ☒ **No** - The clattering of glasses and dishes in buffets?  
☒ **Yes** | ☐ No - The swaying of frames hanging on the wall?  
☐ Yes | ☒ **No** - The creaking of floors?  
☐ Yes | ☒ **No** - Small fragments of plaster falling from ceilings?  
☒ **Yes** | ☐ No - A confusion of the inhabitants (people leaving the house).

### Has it been observed

- ☐ Yes | ☒ **No** - Moving knick-knacks?  
☐ Yes | ☒ **No** - Moving light objects?  
 Which ones?:  
☐ Yes | ☒ **No** - The falling of frames hanging on the wall?  
☐ Yes | ☒ **No** - The falling of light objects placed on polished furniture or marble  
☐ Yes | ☒ **No** - Cracked or broken windows?  
☐ Yes | ☒ **No** - Broken crockery?  
☐ Yes | ☒ **No** - Light objects (vases, flower pots, etc.) spilled?  
☐ Yes | ☒ **No** - Has light furniture moved?  
☐ Yes | ☒ **No** - Has heavy furniture (chests, stoves, ...) vibrated?  
☐ Yes | ☒ **No** - Did bells tinkle?  
☐ Yes | ☒ **No** - Did heavy furniture move?  
☐ Yes | ☒ **No** - Did light furniture tip over?  
☐ Yes | ☒ **No** - Have doors been moved on their hinges?

### Has it been observed

- ☐ Yes | ☒ **No** - Falling pieces of plaster from the ceilings?  
☐ Yes | ☒ **No** - Cracks in wall plaster?  
☒ **Yes** | ☐ No - An exceptional fall of a chimney in poor condition?  
☒ **Yes** | ☐ No - An exceptional fall of some bricks?  
☒ **Yes** | ☐ No - Have there been several damaged chimneys?

How many?: **4**

- ☐ Yes | ☒ **No** - Have there been several chimneys overturned?

How many?:

% for the municipality?:

- ☐ Yes | ☒ **No** - Have there been any falls of façade ornaments?

How important?:

- ☐ Yes | ☒ **No** - Have there been deep cracks in the brick walls?  
☐ Yes | ☒ **No** - Have there been deep cracks in the concrete walls?  
☐ Yes | ☒ **No** - Have there been landslides along the banks or slopes?

Importance:

ADDITIONAL COMMENTS:

## Official inquiry for ERBISOEUL (BE)

Location: 50.515°N 3.898°E, at 8.3 km from the epicentre.

**Imin: 3 - Imax: 3**

### Did some residents perceive

- ☐ Yes | ☒ **No** - Light vibrations?  
☒ **Yes** | ☐ No - A characteristic noise: rumbling or rolling?

### Did many residents perceive

- ☒ **Yes** | ☐ No - A clear shaking of the building?  
☐ Yes | ☒ **No** - A loud rumble?

### Have we witnessed

- ☐ Yes | ☒ **No** - The oscillation of chandeliers or freely suspended objects?  
☐ Yes | ☒ **No** - Swinging chairs or beds?  
☐ Yes | ☒ **No** - Cracking ceilings?  
☐ Yes | ☒ **No** - Sleepers waking up?

### Has it been witnessed or later observed

- ☒ **Yes** | ☐ No - The shivering of windows and doors?  
☐ Yes | ☒ **No** - The shaking of movable objects (tables, vases, knick-knacks, ...)?

### Has it been witnessed or later observed

- ☐ Yes | ☒ **No** - The clattering of glasses and dishes in buffets?  
☐ Yes | ☒ **No** - The swaying of frames hanging on the wall?  
☐ Yes | ☒ **No** - The creaking of floors?  
☐ Yes | ☒ **No** - Small fragments of plaster falling from ceilings?  
☐ Yes | ☒ **No** - A confusion of the inhabitants (people leaving the house).

### Has it been observed

- ☐ Yes | ☒ **No** - Moving knick-knacks?  
☐ Yes | ☒ **No** - Moving light objects?  
 Which ones?:  
☐ Yes | ☒ **No** - The falling of frames hanging on the wall?  
☐ Yes | ☒ **No** - The falling of light objects placed on polished furniture or marble  
☐ Yes | ☒ **No** - Cracked or broken windows?  
☐ Yes | ☒ **No** - Broken crockery?  
☐ Yes | ☒ **No** - Light objects (vases, flower pots, etc.) spilled?  
☐ Yes | ☒ **No** - Has light furniture moved?  
☐ Yes | ☒ **No** - Has heavy furniture (chests, stoves, ...) vibrated?  
☐ Yes | ☒ **No** - Did bells tinkle?  
☐ Yes | ☒ **No** - Did heavy furniture move?  
☐ Yes | ☒ **No** - Did light furniture tip over?  
☐ Yes | ☒ **No** - Have doors been moved on their hinges?

### Has it been observed

- ☐ Yes | ☒ **No** - Falling pieces of plaster from the ceilings?  
☐ Yes | ☒ **No** - Cracks in wall plaster?  
☐ Yes | ☒ **No** - An exceptional fall of a chimney in poor condition?  
☐ Yes | ☒ **No** - An exceptional fall of some bricks?  
☐ Yes | ☒ **No** - Have there been several damaged chimneys?

How many?:

- ☐ Yes | ☒ **No** - Have there been several chimneys overturned?

How many?:

% for the municipality?:

- ☐ Yes | ☒ **No** - Have there been any falls of façade ornaments?

How important?:

- ☐ Yes | ☒ **No** - Have there been deep cracks in the brick walls?  
☐ Yes | ☒ **No** - Have there been deep cracks in the concrete walls?  
☐ Yes | ☒ **No** - Have there been landslides along the banks or slopes?

Importance:

ADDITIONAL COMMENTS:

## Official inquiry for ESTINNES-AU-VAL (BE)

Location: 50.412°N 4.106°E, at 15.0 km from the epicentre.

**Imin: 2 - Imax: 2**

### Did some residents perceive

- ☒ **Yes** | ☐ **No** - Light vibrations?  
☐ **Yes** | ☒ **No** - A characteristic noise: rumbling or rolling?

### Did many residents perceive

- ☐ **Yes** | ☒ **No** - A clear shaking of the building?  
☐ **Yes** | ☒ **No** - A loud rumble?

### Have we witnessed

- ☐ **Yes** | ☒ **No** - The oscillation of chandeliers or freely suspended objects?  
☐ **Yes** | ☒ **No** - Swinging chairs or beds?  
☐ **Yes** | ☒ **No** - Cracking ceilings?  
☐ **Yes** | ☒ **No** - Sleepers waking up?

### Has it been witnessed or later observed

- ☐ **Yes** | ☒ **No** - The shivering of windows and doors?  
☐ **Yes** | ☒ **No** - The shaking of movable objects (tables, vases, knick-knacks, ...)?

### Has it been witnessed or later observed

- ☐ **Yes** | ☒ **No** - The clattering of glasses and dishes in buffets?  
☐ **Yes** | ☒ **No** - The swaying of frames hanging on the wall?  
☐ **Yes** | ☒ **No** - The creaking of floors?  
☐ **Yes** | ☒ **No** - Small fragments of plaster falling from ceilings?  
☐ **Yes** | ☒ **No** - A confusion of the inhabitants (people leaving the house).

### Has it been observed

- ☐ **Yes** | ☒ **No** - Moving knick-knacks?  
☐ **Yes** | ☒ **No** - Moving light objects?  
 Which ones?:  
☐ **Yes** | ☒ **No** - The falling of frames hanging on the wall?  
☐ **Yes** | ☒ **No** - The falling of light objects placed on polished furniture or marble  
☐ **Yes** | ☒ **No** - Cracked or broken windows?  
☐ **Yes** | ☒ **No** - Broken crockery?  
☐ **Yes** | ☒ **No** - Light objects (vases, flower pots, etc.) spilled?  
☐ **Yes** | ☒ **No** - Has light furniture moved?  
☐ **Yes** | ☒ **No** - Has heavy furniture (chests, stoves, ...) vibrated?  
☐ **Yes** | ☒ **No** - Did bells tinkle?  
☐ **Yes** | ☒ **No** - Did heavy furniture move?  
☐ **Yes** | ☒ **No** - Did light furniture tip over?  
☐ **Yes** | ☒ **No** - Have doors been moved on their hinges?

### Has it been observed

- ☐ **Yes** | ☒ **No** - Falling pieces of plaster from the ceilings?  
☐ **Yes** | ☒ **No** - Cracks in wall plaster?  
☐ **Yes** | ☒ **No** - An exceptional fall of a chimney in poor condition?  
☐ **Yes** | ☒ **No** - An exceptional fall of some bricks?  
☐ **Yes** | ☒ **No** - Have there been several damaged chimneys?

How many?:

- ☐ **Yes** | ☒ **No** - Have there been several chimneys overturned?

How many?:

% for the municipality?:

- ☐ **Yes** | ☒ **No** - Have there been any falls of façade ornaments?

How important?:

- ☐ **Yes** | ☒ **No** - Have there been deep cracks in the brick walls?  
☐ **Yes** | ☒ **No** - Have there been deep cracks in the concrete walls?  
☐ **Yes** | ☒ **No** - Have there been landslides along the banks or slopes?

Importance:

ADDITIONAL COMMENTS:

## Official inquiry for EUGIES (BE)

Location: 50.39°N 3.888°E, at 5.6 km from the epicentre.

**Imin: 4 - Imax: 5**

### Did some residents perceive

- ☐ Yes | ☒ **No** - Light vibrations?  
☐ Yes | ☒ **No** - A characteristic noise: rumbling or rolling?

### Did many residents perceive

- ☒ **Yes** | ☐ No - A clear shaking of the building?  
☐ Yes | ☒ **No** - A loud rumble?

### Have we witnessed

- ☐ Yes | ☒ **No** - The oscillation of chandeliers or freely suspended objects?  
☐ Yes | ☒ **No** - Swinging chairs or beds?  
☐ Yes | ☒ **No** - Cracking ceilings?  
☐ Yes | ☒ **No** - Sleepers waking up?

### Has it been witnessed or later observed

- ☐ Yes | ☒ **No** - The shivering of windows and doors?  
☒ **Yes** | ☐ No - The shaking of movable objects (tables, vases, knick-knacks, ...)?

### Has it been witnessed or later observed

- ☐ Yes | ☒ **No** - The clattering of glasses and dishes in buffets?  
☐ Yes | ☒ **No** - The swaying of frames hanging on the wall?  
☐ Yes | ☒ **No** - The creaking of floors?  
☐ Yes | ☒ **No** - Small fragments of plaster falling from ceilings?  
☐ Yes | ☒ **No** - A confusion of the inhabitants (people leaving the house).

### Has it been observed

- ☐ Yes | ☒ **No** - Moving knick-knacks?  
☐ Yes | ☒ **No** - Moving light objects?  
 Which ones?:  
☐ Yes | ☒ **No** - The falling of frames hanging on the wall?  
☐ Yes | ☒ **No** - The falling of light objects placed on polished furniture or marble  
☐ Yes | ☒ **No** - Cracked or broken windows?  
☐ Yes | ☒ **No** - Broken crockery?  
☐ Yes | ☒ **No** - Light objects (vases, flower pots, etc.) spilled?  
☐ Yes | ☒ **No** - Has light furniture moved?  
☐ Yes | ☒ **No** - Has heavy furniture (chests, stoves, ...) vibrated?  
☐ Yes | ☒ **No** - Did bells tinkle?  
☐ Yes | ☒ **No** - Did heavy furniture move?  
☐ Yes | ☒ **No** - Did light furniture tip over?  
☐ Yes | ☒ **No** - Have doors been moved on their hinges?

### Has it been observed

- ☐ Yes | ☒ **No** - Falling pieces of plaster from the ceilings?  
☐ Yes | ☒ **No** - Cracks in wall plaster?  
☒ **Yes** | ☐ No - An exceptional fall of a chimney in poor condition?  
☒ **Yes** | ☐ No - An exceptional fall of some bricks?  
☐ Yes | ☒ **No** - Have there been several damaged chimneys?

How many?:

- ☐ Yes | ☒ **No** - Have there been several chimneys overturned?

How many?:

% for the municipality?:

- ☐ Yes | ☒ **No** - Have there been any falls of façade ornaments?

How important?:

- ☐ Yes | ☒ **No** - Have there been deep cracks in the brick walls?  
☐ Yes | ☒ **No** - Have there been deep cracks in the concrete walls?  
☐ Yes | ☒ **No** - Have there been landslides along the banks or slopes?

Importance:

ADDITIONAL COMMENTS:

## Official inquiry for FLENU (BE)

Location: 50.449°N 3.888°E, at 1.4 km from the epicentre.

**Imin: 5 - Imax: 5**

### Did some residents perceive

- ☐ Yes | ☒ **No** - Light vibrations?  
☐ Yes | ☒ **No** - A characteristic noise: rumbling or rolling?

### Did many residents perceive

- ☒ **Yes** | ☐ No - A clear shaking of the building?  
☒ **Yes** | ☐ No - A loud rumble?

### Have we witnessed

- ☒ **Yes** | ☐ No - The oscillation of chandeliers or freely suspended objects?  
☒ **Yes** | ☐ No - Swinging chairs or beds?  
☒ **Yes** | ☐ No - Cracking ceilings?  
☒ **Yes** | ☐ No - Sleepers waking up?

### Has it been witnessed or later observed

- ☐ Yes | ☒ **No** - The shivering of windows and doors?  
☒ **Yes** | ☐ No - The shaking of movable objects (tables, vases, knick-knacks, ...)?

### Has it been witnessed or later observed

- ☐ Yes | ☒ **No** - The clattering of glasses and dishes in buffets?  
☐ Yes | ☒ **No** - The swaying of frames hanging on the wall?  
☐ Yes | ☒ **No** - The creaking of floors?  
☒ **Yes** | ☐ No - Small fragments of plaster falling from ceilings?  
☐ Yes | ☒ **No** - A confusion of the inhabitants (people leaving the house).

### Has it been observed

- ☐ Yes | ☒ **No** - Moving knick-knacks?  
☒ **Yes** | ☐ No - Moving light objects?  
 Which ones?:  
☐ Yes | ☒ **No** - The falling of frames hanging on the wall?  
☐ Yes | ☒ **No** - The falling of light objects placed on polished furniture or marble  
☐ Yes | ☒ **No** - Cracked or broken windows?  
☐ Yes | ☒ **No** - Broken crockery?  
☐ Yes | ☒ **No** - Light objects (vases, flower pots, etc.) spilled?  
☒ **Yes** | ☐ No - Has light furniture moved?  
☒ **Yes** | ☐ No - Has heavy furniture (chests, stoves, ...) vibrated?  
☐ Yes | ☒ **No** - Did bells tinkle?  
☐ Yes | ☒ **No** - Did heavy furniture move?  
☐ Yes | ☒ **No** - Did light furniture tip over?  
☐ Yes | ☒ **No** - Have doors been moved on their hinges?

### Has it been observed

- ☐ Yes | ☒ **No** - Falling pieces of plaster from the ceilings?  
☐ Yes | ☒ **No** - Cracks in wall plaster?  
☐ Yes | ☒ **No** - An exceptional fall of a chimney in poor condition?  
☐ Yes | ☒ **No** - An exceptional fall of some bricks?  
☒ **Yes** | ☐ No - Have there been several damaged chimneys?

How many?: **7**

- ☐ Yes | ☒ **No** - Have there been several chimneys overturned?

How many?:

% for the municipality?: **1/1000**

- ☐ Yes | ☒ **No** - Have there been any falls of façade ornaments?

How important?:

- ☐ Yes | ☒ **No** - Have there been deep cracks in the brick walls?  
☒ **Yes** | ☐ No - Have there been deep cracks in the concrete walls?  
☐ Yes | ☒ **No** - Have there been landslides along the banks or slopes?

Importance:

ADDITIONAL COMMENTS:

## Official inquiry for FRAMERIES (BE)

Location: 50.411°N 3.894°E, at 3.3 km from the epicentre.

**Imin: 5 - Imax: 5**

### Did some residents perceive

- ☐ Yes | ☒ **No** - Light vibrations?  
☒ **Yes** | ☐ No - A characteristic noise: rumbling or rolling?

### Did many residents perceive

- ☒ **Yes** | ☐ No - A clear shaking of the building?  
☐ Yes | ☒ **No** - A loud rumble?

### Have we witnessed

- ☒ **Yes** | ☐ No - The oscillation of chandeliers or freely suspended objects?  
☐ Yes | ☒ **No** - Swinging chairs or beds?  
☐ Yes | ☒ **No** - Cracking ceilings?  
☐ Yes | ☒ **No** - Sleepers waking up?

### Has it been witnessed or later observed

- ☒ **Yes** | ☐ No - The shivering of windows and doors?  
☐ Yes | ☒ **No** - The shaking of movable objects (tables, vases, knick-knacks, ...)?

### Has it been witnessed or later observed

- ☐ Yes | ☒ **No** - The clattering of glasses and dishes in buffets?  
☐ Yes | ☒ **No** - The swaying of frames hanging on the wall?  
☐ Yes | ☒ **No** - The creaking of floors?  
☐ Yes | ☒ **No** - Small fragments of plaster falling from ceilings?  
☒ **Yes** | ☐ No - A confusion of the inhabitants (people leaving the house).

### Has it been observed

- ☐ Yes | ☒ **No** - Moving knick-knacks?  
☐ Yes | ☒ **No** - Moving light objects?  
 Which ones?:  
☐ Yes | ☒ **No** - The falling of frames hanging on the wall?  
☐ Yes | ☒ **No** - The falling of light objects placed on polished furniture or marble  
☐ Yes | ☒ **No** - Cracked or broken windows?  
☐ Yes | ☒ **No** - Broken crockery?  
☒ **Yes** | ☐ No - Light objects (vases, flower pots, etc.) spilled?  
☐ Yes | ☒ **No** - Has light furniture moved?  
☐ Yes | ☒ **No** - Has heavy furniture (chests, stoves, ...) vibrated?  
☐ Yes | ☒ **No** - Did bells tinkle?  
☐ Yes | ☒ **No** - Did heavy furniture move?  
☐ Yes | ☒ **No** - Did light furniture tip over?  
☐ Yes | ☒ **No** - Have doors been moved on their hinges?

### Has it been observed

- ☐ Yes | ☒ **No** - Falling pieces of plaster from the ceilings?  
☐ Yes | ☒ **No** - Cracks in wall plaster?  
☐ Yes | ☒ **No** - An exceptional fall of a chimney in poor condition?  
☐ Yes | ☒ **No** - An exceptional fall of some bricks?  
☒ **Yes** | ☐ No - Have there been several damaged chimneys?

How many?: **4**

- ☒ **Yes** | ☐ No - Have there been several chimneys overturned?

How many?: **2.0**

% for the municipality?:

- ☐ Yes | ☒ **No** - Have there been any falls of façade ornaments?

How important?:

- ☐ Yes | ☒ **No** - Have there been deep cracks in the brick walls?  
☐ Yes | ☒ **No** - Have there been deep cracks in the concrete walls?  
☐ Yes | ☒ **No** - Have there been landslides along the banks or slopes?

Importance:

ADDITIONAL COMMENTS:

## Official inquiry for GENLY (BE)

Location: 50.393°N 3.919°E, at 5.4 km from the epicentre.

**Imin: 5 - Imax: 5**

### Did some residents perceive

- ☒ **Yes** | ☐ No - Light vibrations?  
☒ **Yes** | ☐ No - A characteristic noise: rumbling or rolling?

### Did many residents perceive

- ☒ **Yes** | ☐ No - A clear shaking of the building?  
☒ **Yes** | ☐ No - A loud rumble?

### Have we witnessed

- ☒ **Yes** | ☐ No - The oscillation of chandeliers or freely suspended objects?  
☐ Yes | ☒ **No** - Swinging chairs or beds?  
☒ **Yes** | ☐ No - Cracking ceilings?  
☐ Yes | ☒ **No** - Sleepers waking up?

### Has it been witnessed or later observed

- ☒ **Yes** | ☐ No - The shivering of windows and doors?  
☒ **Yes** | ☐ No - The shaking of movable objects (tables, vases, knick-knacks, ...)?

### Has it been witnessed or later observed

- ☒ **Yes** | ☐ No - The clattering of glasses and dishes in buffets?  
☒ **Yes** | ☐ No - The swaying of frames hanging on the wall?  
☐ Yes | ☒ **No** - The creaking of floors?  
☒ **Yes** | ☐ No - Small fragments of plaster falling from ceilings?  
☒ **Yes** | ☐ No - A confusion of the inhabitants (people leaving the house).

### Has it been observed

- ☒ **Yes** | ☐ No - Moving knick-knacks?  
☒ **Yes** | ☐ No - Moving light objects?  
 Which ones?:  
☒ **Yes** | ☐ No - The falling of frames hanging on the wall?  
☐ Yes | ☒ **No** - The falling of light objects placed on polished furniture or marble  
☐ Yes | ☒ **No** - Cracked or broken windows?  
☐ Yes | ☒ **No** - Broken crockery?  
☐ Yes | ☒ **No** - Light objects (vases, flower pots, etc.) spilled?  
☐ Yes | ☒ **No** - Has light furniture moved?  
☒ **Yes** | ☐ No - Has heavy furniture (chests, stoves, ...) vibrated?  
☐ Yes | ☒ **No** - Did bells tinkle?  
☐ Yes | ☒ **No** - Did heavy furniture move?  
☐ Yes | ☒ **No** - Did light furniture tip over?  
☐ Yes | ☒ **No** - Have doors been moved on their hinges?

### Has it been observed

- ☒ **Yes** | ☐ No - Falling pieces of plaster from the ceilings?  
☐ Yes | ☒ **No** - Cracks in wall plaster?  
☒ **Yes** | ☐ No - An exceptional fall of a chimney in poor condition?  
☐ Yes | ☒ **No** - An exceptional fall of some bricks?  
☐ Yes | ☒ **No** - Have there been several damaged chimneys?

How many?:

- ☐ Yes | ☒ **No** - Have there been several chimneys overturned?

How many?:

% for the municipality?:

- ☐ Yes | ☒ **No** - Have there been any falls of façade ornaments?

How important?:

- ☐ Yes | ☒ **No** - Have there been deep cracks in the brick walls?  
☐ Yes | ☒ **No** - Have there been deep cracks in the concrete walls?  
☐ Yes | ☒ **No** - Have there been landslides along the banks or slopes?

Importance:

ADDITIONAL COMMENTS:

## Official inquiry for GHLIN (BE)

Location: 50.478°N 3.902°E, at 4.2 km from the epicentre.

**Imin: 5 - Imax: 6**

### Did some residents perceive

- ☐ Yes | ☒ **No** - Light vibrations?  
☒ **Yes** | ☐ No - A characteristic noise: rumbling or rolling?

### Did many residents perceive

- ☐ Yes | ☒ **No** - A clear shaking of the building?  
☒ **Yes** | ☐ No - A loud rumble?

### Have we witnessed

- ☒ **Yes** | ☐ No - The oscillation of chandeliers or freely suspended objects?  
☒ **Yes** | ☐ No - Swinging chairs or beds?  
☒ **Yes** | ☐ No - Cracking ceilings?  
☒ **Yes** | ☐ No - Sleepers waking up?

### Has it been witnessed or later observed

- ☒ **Yes** | ☐ No - The shivering of windows and doors?  
☒ **Yes** | ☐ No - The shaking of movable objects (tables, vases, knick-knacks, ...)?

### Has it been witnessed or later observed

- ☐ Yes | ☒ **No** - The clattering of glasses and dishes in buffets?  
☒ **Yes** | ☐ No - The swaying of frames hanging on the wall?  
☐ Yes | ☒ **No** - The creaking of floors?  
☐ Yes | ☒ **No** - Small fragments of plaster falling from ceilings?  
☐ Yes | ☒ **No** - A confusion of the inhabitants (people leaving the house).

### Has it been observed

- ☐ Yes | ☒ **No** - Moving knick-knacks?  
☐ Yes | ☒ **No** - Moving light objects?  
 Which ones?:  
☐ Yes | ☒ **No** - The falling of frames hanging on the wall?  
☐ Yes | ☒ **No** - The falling of light objects placed on polished furniture or marble  
☐ Yes | ☒ **No** - Cracked or broken windows?  
☐ Yes | ☒ **No** - Broken crockery?  
☐ Yes | ☒ **No** - Light objects (vases, flower pots, etc.) spilled?  
☐ Yes | ☒ **No** - Has light furniture moved?  
☐ Yes | ☒ **No** - Has heavy furniture (chests, stoves, ...) vibrated?  
☐ Yes | ☒ **No** - Did bells tinkle?  
☐ Yes | ☒ **No** - Did heavy furniture move?  
☐ Yes | ☒ **No** - Did light furniture tip over?  
☐ Yes | ☒ **No** - Have doors been moved on their hinges?

### Has it been observed

- ☒ **Yes** | ☐ No - Falling pieces of plaster from the ceilings?  
☐ Yes | ☒ **No** - Cracks in wall plaster?  
☐ Yes | ☒ **No** - An exceptional fall of a chimney in poor condition?  
☒ **Yes** | ☐ No - An exceptional fall of some bricks?  
☒ **Yes** | ☐ No - Have there been several damaged chimneys?

How many?: **6 ou 7**

- ☐ Yes | ☒ **No** - Have there been several chimneys overturned?

How many?:

% for the municipality?:

- ☐ Yes | ☒ **No** - Have there been any falls of façade ornaments?

How important?:

- ☐ Yes | ☒ **No** - Have there been deep cracks in the brick walls?  
☐ Yes | ☒ **No** - Have there been deep cracks in the concrete walls?  
☐ Yes | ☒ **No** - Have there been landslides along the banks or slopes?

Importance:

ADDITIONAL COMMENTS:

## Official inquiry for HAININ (BE)

Location: 50.431°N 3.768°E, at 9.5 km from the epicentre.

**Imin: 2 - Imax: 2**

### Did some residents perceive

- ☒ **Yes** | ☐ No - Light vibrations?  
☒ **Yes** | ☐ No - A characteristic noise: rumbling or rolling?

### Did many residents perceive

- ☐ Yes | ☒ **No** - A clear shaking of the building?  
☐ Yes | ☒ **No** - A loud rumble?

### Have we witnessed

- ☐ Yes | ☒ **No** - The oscillation of chandeliers or freely suspended objects?  
☐ Yes | ☒ **No** - Swinging chairs or beds?  
☐ Yes | ☒ **No** - Cracking ceilings?  
☐ Yes | ☒ **No** - Sleepers waking up?

### Has it been witnessed or later observed

- ☐ Yes | ☒ **No** - The shivering of windows and doors?  
☐ Yes | ☒ **No** - The shaking of movable objects (tables, vases, knick-knacks, ...)?

### Has it been witnessed or later observed

- ☐ Yes | ☒ **No** - The clattering of glasses and dishes in buffets?  
☐ Yes | ☒ **No** - The swaying of frames hanging on the wall?  
☐ Yes | ☒ **No** - The creaking of floors?  
☐ Yes | ☒ **No** - Small fragments of plaster falling from ceilings?  
☐ Yes | ☒ **No** - A confusion of the inhabitants (people leaving the house).

### Has it been observed

- ☐ Yes | ☒ **No** - Moving knick-knacks?  
☐ Yes | ☒ **No** - Moving light objects?  
 Which ones?:  
☐ Yes | ☒ **No** - The falling of frames hanging on the wall?  
☐ Yes | ☒ **No** - The falling of light objects placed on polished furniture or marble  
☐ Yes | ☒ **No** - Cracked or broken windows?  
☐ Yes | ☒ **No** - Broken crockery?  
☐ Yes | ☒ **No** - Light objects (vases, flower pots, etc.) spilled?  
☐ Yes | ☒ **No** - Has light furniture moved?  
☐ Yes | ☒ **No** - Has heavy furniture (chests, stoves, ...) vibrated?  
☐ Yes | ☒ **No** - Did bells tinkle?  
☐ Yes | ☒ **No** - Did heavy furniture move?  
☐ Yes | ☒ **No** - Did light furniture tip over?  
☐ Yes | ☒ **No** - Have doors been moved on their hinges?

### Has it been observed

- ☐ Yes | ☒ **No** - Falling pieces of plaster from the ceilings?  
☐ Yes | ☒ **No** - Cracks in wall plaster?  
☐ Yes | ☒ **No** - An exceptional fall of a chimney in poor condition?  
☐ Yes | ☒ **No** - An exceptional fall of some bricks?  
☐ Yes | ☒ **No** - Have there been several damaged chimneys?

How many?:

- ☐ Yes | ☒ **No** - Have there been several chimneys overturned?

How many?:

% for the municipality?:

- ☐ Yes | ☒ **No** - Have there been any falls of façade ornaments?

How important?:

- ☐ Yes | ☒ **No** - Have there been deep cracks in the brick walls?  
☐ Yes | ☒ **No** - Have there been deep cracks in the concrete walls?  
☐ Yes | ☒ **No** - Have there been landslides along the banks or slopes?

Importance:

ADDITIONAL COMMENTS:

## Official inquiry for HARVENG (BE)

Location: 50.396°N 3.988°E, at 8.0 km from the epicentre.

**Imin: 2 - Imax: 2**

### Did some residents perceive

☒ **Yes** | ☐ No - Light vibrations?

☒ **Yes** | ☐ No - A characteristic noise: rumbling or rolling?

### Did many residents perceive

☐ Yes | ☒ **No** - A clear shaking of the building?

☐ Yes | ☒ **No** - A loud rumble?

### Have we witnessed

☐ Yes | ☒ **No** - The oscillation of chandeliers or freely suspended objects?

☐ Yes | ☒ **No** - Swinging chairs or beds?

☐ Yes | ☒ **No** - Cracking ceilings?

☐ Yes | ☒ **No** - Sleepers waking up?

### Has it been witnessed or later observed

☐ Yes | ☒ **No** - The shivering of windows and doors?

☐ Yes | ☒ **No** - The shaking of movable objects (tables, vases, knick-knacks, ...)?

### Has it been witnessed or later observed

☐ Yes | ☒ **No** - The clattering of glasses and dishes in buffets?

☐ Yes | ☒ **No** - The swaying of frames hanging on the wall?

☐ Yes | ☒ **No** - The creaking of floors?

☐ Yes | ☒ **No** - Small fragments of plaster falling from ceilings?

☐ Yes | ☒ **No** - A confusion of the inhabitants (people leaving the house).

### Has it been observed

☐ Yes | ☒ **No** - Moving knick-knacks?

☐ Yes | ☒ **No** - Moving light objects?

Which ones?:

☐ Yes | ☒ **No** - The falling of frames hanging on the wall?

☐ Yes | ☒ **No** - The falling of light objects placed on polished furniture or marble

☐ Yes | ☒ **No** - Cracked or broken windows?

☐ Yes | ☒ **No** - Broken crockery?

☐ Yes | ☒ **No** - Light objects (vases, flower pots, etc.) spilled?

☐ Yes | ☒ **No** - Has light furniture moved?

☐ Yes | ☒ **No** - Has heavy furniture (chests, stoves, ...) vibrated?

☐ Yes | ☒ **No** - Did bells tinkle?

☐ Yes | ☒ **No** - Did heavy furniture move?

☐ Yes | ☒ **No** - Did light furniture tip over?

☐ Yes | ☒ **No** - Have doors been moved on their hinges?

### Has it been observed

☐ Yes | ☒ **No** - Falling pieces of plaster from the ceilings?

☐ Yes | ☒ **No** - Cracks in wall plaster?

☐ Yes | ☒ **No** - An exceptional fall of a chimney in poor condition?

☐ Yes | ☒ **No** - An exceptional fall of some bricks?

☐ Yes | ☒ **No** - Have there been several damaged chimneys?

How many?:

☐ Yes | ☒ **No** - Have there been several chimneys overturned?

How many?:

% for the municipality?:

☐ Yes | ☒ **No** - Have there been any falls of façade ornaments?

How important?:

☐ Yes | ☒ **No** - Have there been deep cracks in the brick walls?

☐ Yes | ☒ **No** - Have there been deep cracks in the concrete walls?

☐ Yes | ☒ **No** - Have there been landslides along the banks or slopes?

Importance:

ADDITIONAL COMMENTS:

## Official inquiry for HAVAY (BE)

Location: 50.362°N 3.986°E, at 10.6 km from the epicentre.

**Imin: 2 - Imax: 2**

### Did some residents perceive

- ☒ **Yes** | ☐ **No** - Light vibrations?  
☐ **Yes** | ☒ **No** - A characteristic noise: rumbling or rolling?

### Did many residents perceive

- ☐ **Yes** | ☒ **No** - A clear shaking of the building?  
☐ **Yes** | ☒ **No** - A loud rumble?

### Have we witnessed

- ☐ **Yes** | ☒ **No** - The oscillation of chandeliers or freely suspended objects?  
☐ **Yes** | ☒ **No** - Swinging chairs or beds?  
☐ **Yes** | ☒ **No** - Cracking ceilings?  
☐ **Yes** | ☒ **No** - Sleepers waking up?

### Has it been witnessed or later observed

- ☐ **Yes** | ☒ **No** - The shivering of windows and doors?  
☐ **Yes** | ☒ **No** - The shaking of movable objects (tables, vases, knick-knacks, ...)?

### Has it been witnessed or later observed

- ☐ **Yes** | ☒ **No** - The clattering of glasses and dishes in buffets?  
☐ **Yes** | ☒ **No** - The swaying of frames hanging on the wall?  
☐ **Yes** | ☒ **No** - The creaking of floors?  
☐ **Yes** | ☒ **No** - Small fragments of plaster falling from ceilings?  
☐ **Yes** | ☒ **No** - A confusion of the inhabitants (people leaving the house).

### Has it been observed

- ☐ **Yes** | ☒ **No** - Moving knick-knacks?  
☐ **Yes** | ☒ **No** - Moving light objects?  
 Which ones?:  
☐ **Yes** | ☒ **No** - The falling of frames hanging on the wall?  
☐ **Yes** | ☒ **No** - The falling of light objects placed on polished furniture or marble  
☐ **Yes** | ☒ **No** - Cracked or broken windows?  
☐ **Yes** | ☒ **No** - Broken crockery?  
☐ **Yes** | ☒ **No** - Light objects (vases, flower pots, etc.) spilled?  
☐ **Yes** | ☒ **No** - Has light furniture moved?  
☐ **Yes** | ☒ **No** - Has heavy furniture (chests, stoves, ...) vibrated?  
☐ **Yes** | ☒ **No** - Did bells tinkle?  
☐ **Yes** | ☒ **No** - Did heavy furniture move?  
☐ **Yes** | ☒ **No** - Did light furniture tip over?  
☐ **Yes** | ☒ **No** - Have doors been moved on their hinges?

### Has it been observed

- ☐ **Yes** | ☒ **No** - Falling pieces of plaster from the ceilings?  
☐ **Yes** | ☒ **No** - Cracks in wall plaster?  
☐ **Yes** | ☒ **No** - An exceptional fall of a chimney in poor condition?  
☐ **Yes** | ☒ **No** - An exceptional fall of some bricks?  
☐ **Yes** | ☒ **No** - Have there been several damaged chimneys?

How many?:

- ☐ **Yes** | ☒ **No** - Have there been several chimneys overturned?

How many?:

% for the municipality?:

- ☐ **Yes** | ☒ **No** - Have there been any falls of façade ornaments?

How important?:

- ☐ **Yes** | ☒ **No** - Have there been deep cracks in the brick walls?  
☐ **Yes** | ☒ **No** - Have there been deep cracks in the concrete walls?  
☐ **Yes** | ☒ **No** - Have there been landslides along the banks or slopes?

Importance:

ADDITIONAL COMMENTS:

## Official inquiry for HAVRE (BE)

Location: 50.466°N 4.047°E, at 10.8 km from the epicentre.

**Imin: 3 - Imax: 3**

### Did some residents perceive

- ☐ Yes | ☒ **No** - Light vibrations?  
☒ **Yes** | ☐ No - A characteristic noise: rumbling or rolling?

### Did many residents perceive

- ☐ Yes | ☒ **No** - A clear shaking of the building?  
☐ Yes | ☒ **No** - A loud rumble?

### Have we witnessed

- ☒ **Yes** | ☐ No - The oscillation of chandeliers or freely suspended objects?  
☐ Yes | ☒ **No** - Swinging chairs or beds?  
☐ Yes | ☒ **No** - Cracking ceilings?  
☐ Yes | ☒ **No** - Sleepers waking up?

### Has it been witnessed or later observed

- ☒ **Yes** | ☐ No - The shivering of windows and doors?  
☐ Yes | ☒ **No** - The shaking of movable objects (tables, vases, knick-knacks, ...)?

### Has it been witnessed or later observed

- ☐ Yes | ☒ **No** - The clattering of glasses and dishes in buffets?  
☐ Yes | ☒ **No** - The swaying of frames hanging on the wall?  
☐ Yes | ☒ **No** - The creaking of floors?  
☐ Yes | ☒ **No** - Small fragments of plaster falling from ceilings?  
☐ Yes | ☒ **No** - A confusion of the inhabitants (people leaving the house).

### Has it been observed

- ☐ Yes | ☒ **No** - Moving knick-knacks?  
☐ Yes | ☒ **No** - Moving light objects?  
 Which ones?:  
☐ Yes | ☒ **No** - The falling of frames hanging on the wall?  
☐ Yes | ☒ **No** - The falling of light objects placed on polished furniture or marble  
☐ Yes | ☒ **No** - Cracked or broken windows?  
☐ Yes | ☒ **No** - Broken crockery?  
☐ Yes | ☒ **No** - Light objects (vases, flower pots, etc.) spilled?  
☐ Yes | ☒ **No** - Has light furniture moved?  
☐ Yes | ☒ **No** - Has heavy furniture (chests, stoves, ...) vibrated?  
☐ Yes | ☒ **No** - Did bells tinkle?  
☐ Yes | ☒ **No** - Did heavy furniture move?  
☐ Yes | ☒ **No** - Did light furniture tip over?  
☐ Yes | ☒ **No** - Have doors been moved on their hinges?

### Has it been observed

- ☐ Yes | ☒ **No** - Falling pieces of plaster from the ceilings?  
☐ Yes | ☒ **No** - Cracks in wall plaster?  
☐ Yes | ☒ **No** - An exceptional fall of a chimney in poor condition?  
☐ Yes | ☒ **No** - An exceptional fall of some bricks?  
☐ Yes | ☒ **No** - Have there been several damaged chimneys?

How many?:

- ☐ Yes | ☒ **No** - Have there been several chimneys overturned?

How many?:

% for the municipality?:

- ☐ Yes | ☒ **No** - Have there been any falls of façade ornaments?

How important?:

- ☐ Yes | ☒ **No** - Have there been deep cracks in the brick walls?  
☐ Yes | ☒ **No** - Have there been deep cracks in the concrete walls?  
☐ Yes | ☒ **No** - Have there been landslides along the banks or slopes?

Importance:

ADDITIONAL COMMENTS:

## Official inquiry for HORNU (BE)

Location: 50.434°N 3.829°E, at 5.1 km from the epicentre.

**Imin: 5 - Imax: 5**

### Did some residents perceive

- ☒ **Yes** | ☐ No - Light vibrations?  
☒ **Yes** | ☐ No - A characteristic noise: rumbling or rolling?

### Did many residents perceive

- ☒ **Yes** | ☐ No - A clear shaking of the building?  
☒ **Yes** | ☐ No - A loud rumble?

### Have we witnessed

- ☒ **Yes** | ☐ No - The oscillation of chandeliers or freely suspended objects?  
☐ Yes | ☒ **No** - Swinging chairs or beds?  
☐ Yes | ☒ **No** - Cracking ceilings?  
☐ Yes | ☒ **No** - Sleepers waking up?

### Has it been witnessed or later observed

- ☒ **Yes** | ☐ No - The shivering of windows and doors?  
☒ **Yes** | ☐ No - The shaking of movable objects (tables, vases, knick-knacks, ...)?

### Has it been witnessed or later observed

- ☒ **Yes** | ☐ No - The clattering of glasses and dishes in buffets?  
☒ **Yes** | ☐ No - The swaying of frames hanging on the wall?  
☒ **Yes** | ☐ No - The creaking of floors?  
☒ **Yes** | ☐ No - Small fragments of plaster falling from ceilings?  
☒ **Yes** | ☐ No - A confusion of the inhabitants (people leaving the house).

### Has it been observed

- ☐ Yes | ☒ **No** - Moving knick-knacks?  
☐ Yes | ☒ **No** - Moving light objects?  
 Which ones?:  
☐ Yes | ☒ **No** - The falling of frames hanging on the wall?  
☐ Yes | ☒ **No** - The falling of light objects placed on polished furniture or marble  
☐ Yes | ☒ **No** - Cracked or broken windows?  
☐ Yes | ☒ **No** - Broken crockery?  
☐ Yes | ☒ **No** - Light objects (vases, flower pots, etc.) spilled?  
☐ Yes | ☒ **No** - Has light furniture moved?  
☐ Yes | ☒ **No** - Has heavy furniture (chests, stoves, ...) vibrated?  
☐ Yes | ☒ **No** - Did bells tinkle?  
☐ Yes | ☒ **No** - Did heavy furniture move?  
☐ Yes | ☒ **No** - Did light furniture tip over?  
☐ Yes | ☒ **No** - Have doors been moved on their hinges?

### Has it been observed

- ☒ **Yes** | ☐ No - Falling pieces of plaster from the ceilings?  
☒ **Yes** | ☐ No - Cracks in wall plaster?  
☐ Yes | ☒ **No** - An exceptional fall of a chimney in poor condition?  
☒ **Yes** | ☐ No - An exceptional fall of some bricks?  
☐ Yes | ☒ **No** - Have there been several damaged chimneys?

How many?:

- ☐ Yes | ☒ **No** - Have there been several chimneys overturned?

How many?:

% for the municipality?:

- ☐ Yes | ☒ **No** - Have there been any falls of façade ornaments?

How important?:

- ☐ Yes | ☒ **No** - Have there been deep cracks in the brick walls?  
☐ Yes | ☒ **No** - Have there been deep cracks in the concrete walls?  
☐ Yes | ☒ **No** - Have there been landslides along the banks or slopes?

Importance:

ADDITIONAL COMMENTS:

## Official inquiry for HYON (BE)

Location: 50.441°N 3.966°E, at 4.7 km from the epicentre.

**Imin: 5 - Imax: 5**

### Did some residents perceive

- ☐ Yes | ☒ **No** - Light vibrations?  
☒ **Yes** | ☐ No - A characteristic noise: rumbling or rolling?

### Did many residents perceive

- ☐ Yes | ☒ **No** - A clear shaking of the building?  
☐ Yes | ☒ **No** - A loud rumble?

### Have we witnessed

- ☐ Yes | ☒ **No** - The oscillation of chandeliers or freely suspended objects?  
☐ Yes | ☒ **No** - Swinging chairs or beds?  
☐ Yes | ☒ **No** - Cracking ceilings?  
☐ Yes | ☒ **No** - Sleepers waking up?

### Has it been witnessed or later observed

- ☐ Yes | ☒ **No** - The shivering of windows and doors?  
☒ **Yes** | ☐ No - The shaking of movable objects (tables, vases, knick-knacks, ...)?

### Has it been witnessed or later observed

- ☐ Yes | ☒ **No** - The clattering of glasses and dishes in buffets?  
☒ **Yes** | ☐ No - The swaying of frames hanging on the wall?  
☐ Yes | ☒ **No** - The creaking of floors?  
☐ Yes | ☒ **No** - Small fragments of plaster falling from ceilings?  
☒ **Yes** | ☐ No - A confusion of the inhabitants (people leaving the house).

### Has it been observed

- ☐ Yes | ☒ **No** - Moving knick-knacks?  
☐ Yes | ☒ **No** - Moving light objects?  
 Which ones?:  
☐ Yes | ☒ **No** - The falling of frames hanging on the wall?  
☐ Yes | ☒ **No** - The falling of light objects placed on polished furniture or marble  
☐ Yes | ☒ **No** - Cracked or broken windows?  
☐ Yes | ☒ **No** - Broken crockery?  
☐ Yes | ☒ **No** - Light objects (vases, flower pots, etc.) spilled?  
☐ Yes | ☒ **No** - Has light furniture moved?  
☐ Yes | ☒ **No** - Has heavy furniture (chests, stoves, ...) vibrated?  
☐ Yes | ☒ **No** - Did bells tinkle?  
☐ Yes | ☒ **No** - Did heavy furniture move?  
☐ Yes | ☒ **No** - Did light furniture tip over?  
☐ Yes | ☒ **No** - Have doors been moved on their hinges?

### Has it been observed

- ☒ **Yes** | ☐ No - Falling pieces of plaster from the ceilings?  
☐ Yes | ☒ **No** - Cracks in wall plaster?  
☒ **Yes** | ☐ No - An exceptional fall of a chimney in poor condition?  
☒ **Yes** | ☐ No - An exceptional fall of some bricks?  
☒ **Yes** | ☐ No - Have there been several damaged chimneys?

How many?: **3**

- ☐ Yes | ☒ **No** - Have there been several chimneys overturned?

How many?:

% for the municipality?:

- ☐ Yes | ☒ **No** - Have there been any falls of façade ornaments?

How important?:

- ☐ Yes | ☒ **No** - Have there been deep cracks in the brick walls?  
☐ Yes | ☒ **No** - Have there been deep cracks in the concrete walls?  
☐ Yes | ☒ **No** - Have there been landslides along the banks or slopes?

Importance:

ADDITIONAL COMMENTS: **la secousse a été fortement ressentie dans la commune**

## Official inquiry for LA BOUVERIE (BE)

Location: 50.405°N 3.876°E, at 4.2 km from the epicentre.

**Imin: 4 - Imax: 4**

### Did some residents perceive

- ☒ **Yes** | ☐ No - Light vibrations?  
☒ **Yes** | ☐ No - A characteristic noise: rumbling or rolling?

### Did many residents perceive

- ☐ Yes | ☒ **No** - A clear shaking of the building?  
☐ Yes | ☒ **No** - A loud rumble?

### Have we witnessed

- ☐ Yes | ☒ **No** - The oscillation of chandeliers or freely suspended objects?  
☐ Yes | ☒ **No** - Swinging chairs or beds?  
☐ Yes | ☒ **No** - Cracking ceilings?  
☐ Yes | ☒ **No** - Sleepers waking up?

### Has it been witnessed or later observed

- ☒ **Yes** | ☐ No - The shivering of windows and doors?  
☐ Yes | ☒ **No** - The shaking of movable objects (tables, vases, knick-knacks, ...)?

### Has it been witnessed or later observed

- ☐ Yes | ☒ **No** - The clattering of glasses and dishes in buffets?  
☐ Yes | ☒ **No** - The swaying of frames hanging on the wall?  
☐ Yes | ☒ **No** - The creaking of floors?  
☐ Yes | ☒ **No** - Small fragments of plaster falling from ceilings?  
☒ **Yes** | ☐ No - A confusion of the inhabitants (people leaving the house).

### Has it been observed

- ☐ Yes | ☒ **No** - Moving knick-knacks?  
☐ Yes | ☒ **No** - Moving light objects?  
 Which ones?:  
☐ Yes | ☒ **No** - The falling of frames hanging on the wall?  
☐ Yes | ☒ **No** - The falling of light objects placed on polished furniture or marble  
☐ Yes | ☒ **No** - Cracked or broken windows?  
☐ Yes | ☒ **No** - Broken crockery?  
☐ Yes | ☒ **No** - Light objects (vases, flower pots, etc.) spilled?  
☐ Yes | ☒ **No** - Has light furniture moved?  
☐ Yes | ☒ **No** - Has heavy furniture (chests, stoves, ...) vibrated?  
☐ Yes | ☒ **No** - Did bells tinkle?  
☐ Yes | ☒ **No** - Did heavy furniture move?  
☐ Yes | ☒ **No** - Did light furniture tip over?  
☐ Yes | ☒ **No** - Have doors been moved on their hinges?

### Has it been observed

- ☐ Yes | ☒ **No** - Falling pieces of plaster from the ceilings?  
☐ Yes | ☒ **No** - Cracks in wall plaster?  
☐ Yes | ☒ **No** - An exceptional fall of a chimney in poor condition?  
☐ Yes | ☒ **No** - An exceptional fall of some bricks?  
☐ Yes | ☒ **No** - Have there been several damaged chimneys?

How many?:

- ☐ Yes | ☒ **No** - Have there been several chimneys overturned?

How many?:

% for the municipality?:

- ☐ Yes | ☒ **No** - Have there been any falls of façade ornaments?

How important?:

- ☐ Yes | ☒ **No** - Have there been deep cracks in the brick walls?  
☐ Yes | ☒ **No** - Have there been deep cracks in the concrete walls?  
☐ Yes | ☒ **No** - Have there been landslides along the banks or slopes?

Importance:

ADDITIONAL COMMENTS:

## Official inquiry for LOMBISE (BE)

Location: 50.6°N 3.941°E, at 18.0 km from the epicentre.

**Imin: 3 - Imax: 3**

### Did some residents perceive

- ☒ **Yes** | ☐ **No** - Light vibrations?  
☐ **Yes** | ☒ **No** - A characteristic noise: rumbling or rolling?

### Did many residents perceive

- ☐ **Yes** | ☒ **No** - A clear shaking of the building?  
☐ **Yes** | ☒ **No** - A loud rumble?

### Have we witnessed

- ☐ **Yes** | ☒ **No** - The oscillation of chandeliers or freely suspended objects?  
☐ **Yes** | ☒ **No** - Swinging chairs or beds?  
☐ **Yes** | ☒ **No** - Cracking ceilings?  
☐ **Yes** | ☒ **No** - Sleepers waking up?

### Has it been witnessed or later observed

- ☐ **Yes** | ☒ **No** - The shivering of windows and doors?  
☐ **Yes** | ☒ **No** - The shaking of movable objects (tables, vases, knick-knacks, ...)?

### Has it been witnessed or later observed

- ☐ **Yes** | ☒ **No** - The clattering of glasses and dishes in buffets?  
☐ **Yes** | ☒ **No** - The swaying of frames hanging on the wall?  
☐ **Yes** | ☒ **No** - The creaking of floors?  
☐ **Yes** | ☒ **No** - Small fragments of plaster falling from ceilings?  
☐ **Yes** | ☒ **No** - A confusion of the inhabitants (people leaving the house).

### Has it been observed

- ☐ **Yes** | ☒ **No** - Moving knick-knacks?  
☐ **Yes** | ☒ **No** - Moving light objects?

Which ones?:

- ☐ **Yes** | ☒ **No** - The falling of frames hanging on the wall?  
☐ **Yes** | ☒ **No** - The falling of light objects placed on polished furniture or marble  
☐ **Yes** | ☒ **No** - Cracked or broken windows?  
☐ **Yes** | ☒ **No** - Broken crockery?  
☐ **Yes** | ☒ **No** - Light objects (vases, flower pots, etc.) spilled?  
☐ **Yes** | ☒ **No** - Has light furniture moved?  
☐ **Yes** | ☒ **No** - Has heavy furniture (chests, stoves, ...) vibrated?  
☐ **Yes** | ☒ **No** - Did bells tinkle?  
☐ **Yes** | ☒ **No** - Did heavy furniture move?  
☐ **Yes** | ☒ **No** - Did light furniture tip over?  
☐ **Yes** | ☒ **No** - Have doors been moved on their hinges?

### Has it been observed

- ☐ **Yes** | ☒ **No** - Falling pieces of plaster from the ceilings?  
☐ **Yes** | ☒ **No** - Cracks in wall plaster?  
☐ **Yes** | ☒ **No** - An exceptional fall of a chimney in poor condition?  
☐ **Yes** | ☒ **No** - An exceptional fall of some bricks?  
☐ **Yes** | ☒ **No** - Have there been several damaged chimneys?

How many?:

- ☐ **Yes** | ☒ **No** - Have there been several chimneys overturned?

How many?:

% for the municipality?:

- ☐ **Yes** | ☒ **No** - Have there been any falls of façade ornaments?

How important?:

- ☐ **Yes** | ☒ **No** - Have there been deep cracks in the brick walls?  
☐ **Yes** | ☒ **No** - Have there been deep cracks in the concrete walls?  
☐ **Yes** | ☒ **No** - Have there been landslides along the banks or slopes?

Importance:

ADDITIONAL COMMENTS: **un bruit ressemblant à une explosion a été perçu**

## Official inquiry for MASNUY-SAINT-PIERRE (BE)

Location: 50.537°N 3.959°E, at 11.6 km from the epicentre.

**Imin: 3 - Imax: 3**

### Did some residents perceive

- ☒ **Yes** | ☐ No - Light vibrations?  
☐ Yes | ☒ **No** - A characteristic noise: rumbling or rolling?

### Did many residents perceive

- ☐ Yes | ☒ **No** - A clear shaking of the building?  
☐ Yes | ☒ **No** - A loud rumble?

### Have we witnessed

- ☒ **Yes** | ☐ No - The oscillation of chandeliers or freely suspended objects?  
☐ Yes | ☒ **No** - Swinging chairs or beds?  
☐ Yes | ☒ **No** - Cracking ceilings?  
☐ Yes | ☒ **No** - Sleepers waking up?

### Has it been witnessed or later observed

- ☐ Yes | ☒ **No** - The shivering of windows and doors?  
☐ Yes | ☒ **No** - The shaking of movable objects (tables, vases, knick-knacks, ...)?

### Has it been witnessed or later observed

- ☐ Yes | ☒ **No** - The clattering of glasses and dishes in buffets?  
☐ Yes | ☒ **No** - The swaying of frames hanging on the wall?  
☐ Yes | ☒ **No** - The creaking of floors?  
☐ Yes | ☒ **No** - Small fragments of plaster falling from ceilings?  
☐ Yes | ☒ **No** - A confusion of the inhabitants (people leaving the house).

### Has it been observed

- ☐ Yes | ☒ **No** - Moving knick-knacks?  
☒ **Yes** | ☐ No - Moving light objects?  
 Which ones?: *chute d'un rouleau de "balamur" debout*  
☐ Yes | ☒ **No** - The falling of frames hanging on the wall?  
☐ Yes | ☒ **No** - The falling of light objects placed on polished furniture or marble  
☐ Yes | ☒ **No** - Cracked or broken windows?  
☐ Yes | ☒ **No** - Broken crockery?  
☐ Yes | ☒ **No** - Light objects (vases, flower pots, etc.) spilled?  
☐ Yes | ☒ **No** - Has light furniture moved?  
☐ Yes | ☒ **No** - Has heavy furniture (chests, stoves, ...) vibrated?  
☐ Yes | ☒ **No** - Did bells tinkle?  
☐ Yes | ☒ **No** - Did heavy furniture move?  
☐ Yes | ☒ **No** - Did light furniture tip over?  
☐ Yes | ☒ **No** - Have doors been moved on their hinges?

### Has it been observed

- ☐ Yes | ☒ **No** - Falling pieces of plaster from the ceilings?  
☐ Yes | ☒ **No** - Cracks in wall plaster?  
☐ Yes | ☒ **No** - An exceptional fall of a chimney in poor condition?  
☐ Yes | ☒ **No** - An exceptional fall of some bricks?  
☐ Yes | ☒ **No** - Have there been several damaged chimneys?

How many?:

- ☐ Yes | ☒ **No** - Have there been several chimneys overturned?

How many?:

% for the municipality?:

- ☐ Yes | ☒ **No** - Have there been any falls of façade ornaments?

How important?:

- ☐ Yes | ☒ **No** - Have there been deep cracks in the brick walls?  
☐ Yes | ☒ **No** - Have there been deep cracks in the concrete walls?  
☐ Yes | ☒ **No** - Have there been landslides along the banks or slopes?

Importance:

ADDITIONAL COMMENTS:

## Official inquiry for MAURAGE (BE)

Location: 50.456°N 4.102°E, at 14.5 km from the epicentre.

**Imin: 2 - Imax: 2**

### Did some residents perceive

- ☒ **Yes** | ☐ **No** - Light vibrations?  
☐ **Yes** | ☒ **No** - A characteristic noise: rumbling or rolling?

### Did many residents perceive

- ☐ **Yes** | ☒ **No** - A clear shaking of the building?  
☐ **Yes** | ☒ **No** - A loud rumble?

### Have we witnessed

- ☐ **Yes** | ☒ **No** - The oscillation of chandeliers or freely suspended objects?  
☐ **Yes** | ☒ **No** - Swinging chairs or beds?  
☐ **Yes** | ☒ **No** - Cracking ceilings?  
☐ **Yes** | ☒ **No** - Sleepers waking up?

### Has it been witnessed or later observed

- ☐ **Yes** | ☒ **No** - The shivering of windows and doors?  
☐ **Yes** | ☒ **No** - The shaking of movable objects (tables, vases, knick-knacks, ...)?

### Has it been witnessed or later observed

- ☐ **Yes** | ☒ **No** - The clattering of glasses and dishes in buffets?  
☐ **Yes** | ☒ **No** - The swaying of frames hanging on the wall?  
☐ **Yes** | ☒ **No** - The creaking of floors?  
☐ **Yes** | ☒ **No** - Small fragments of plaster falling from ceilings?  
☐ **Yes** | ☒ **No** - A confusion of the inhabitants (people leaving the house).

### Has it been observed

- ☐ **Yes** | ☒ **No** - Moving knick-knacks?  
☐ **Yes** | ☒ **No** - Moving light objects?  
 Which ones?:  
☐ **Yes** | ☒ **No** - The falling of frames hanging on the wall?  
☐ **Yes** | ☒ **No** - The falling of light objects placed on polished furniture or marble  
☐ **Yes** | ☒ **No** - Cracked or broken windows?  
☐ **Yes** | ☒ **No** - Broken crockery?  
☐ **Yes** | ☒ **No** - Light objects (vases, flower pots, etc.) spilled?  
☐ **Yes** | ☒ **No** - Has light furniture moved?  
☐ **Yes** | ☒ **No** - Has heavy furniture (chests, stoves, ...) vibrated?  
☐ **Yes** | ☒ **No** - Did bells tinkle?  
☐ **Yes** | ☒ **No** - Did heavy furniture move?  
☐ **Yes** | ☒ **No** - Did light furniture tip over?  
☐ **Yes** | ☒ **No** - Have doors been moved on their hinges?

### Has it been observed

- ☐ **Yes** | ☒ **No** - Falling pieces of plaster from the ceilings?  
☐ **Yes** | ☒ **No** - Cracks in wall plaster?  
☐ **Yes** | ☒ **No** - An exceptional fall of a chimney in poor condition?  
☐ **Yes** | ☒ **No** - An exceptional fall of some bricks?  
☐ **Yes** | ☒ **No** - Have there been several damaged chimneys?

How many?:

- ☐ **Yes** | ☒ **No** - Have there been several chimneys overturned?

How many?:

% for the municipality?:

- ☐ **Yes** | ☒ **No** - Have there been any falls of façade ornaments?

How important?:

- ☐ **Yes** | ☒ **No** - Have there been deep cracks in the brick walls?  
☐ **Yes** | ☒ **No** - Have there been deep cracks in the concrete walls?  
☐ **Yes** | ☒ **No** - Have there been landslides along the banks or slopes?

Importance:

ADDITIONAL COMMENTS:

## Official inquiry for MESVIN (BE)

Location: 50.427°N 3.961°E, at 4.5 km from the epicentre.

**Imin: 5 - Imax: 5**

### Did some residents perceive

- ☐ Yes | ☒ **No** - Light vibrations?  
☒ **Yes** | ☐ No - A characteristic noise: rumbling or rolling?

### Did many residents perceive

- ☒ **Yes** | ☐ No - A clear shaking of the building?  
☐ Yes | ☒ **No** - A loud rumble?

### Have we witnessed

- ☒ **Yes** | ☐ No - The oscillation of chandeliers or freely suspended objects?  
☒ **Yes** | ☐ No - Swinging chairs or beds?  
☐ Yes | ☒ **No** - Cracking ceilings?  
☐ Yes | ☒ **No** - Sleepers waking up?

### Has it been witnessed or later observed

- ☒ **Yes** | ☐ No - The shivering of windows and doors?  
☒ **Yes** | ☐ No - The shaking of movable objects (tables, vases, knick-knacks, ...)?

### Has it been witnessed or later observed

- ☒ **Yes** | ☐ No - The clattering of glasses and dishes in buffets?  
☒ **Yes** | ☐ No - The swaying of frames hanging on the wall?  
☐ Yes | ☒ **No** - The creaking of floors?  
☒ **Yes** | ☐ No - Small fragments of plaster falling from ceilings?  
☒ **Yes** | ☐ No - A confusion of the inhabitants (people leaving the house).

### Has it been observed

- ☐ Yes | ☒ **No** - Moving knick-knacks?  
☐ Yes | ☒ **No** - Moving light objects?  
 Which ones?:  
☐ Yes | ☒ **No** - The falling of frames hanging on the wall?  
☐ Yes | ☒ **No** - The falling of light objects placed on polished furniture or marble  
☐ Yes | ☒ **No** - Cracked or broken windows?  
☐ Yes | ☒ **No** - Broken crockery?  
☐ Yes | ☒ **No** - Light objects (vases, flower pots, etc.) spilled?  
☐ Yes | ☒ **No** - Has light furniture moved?  
☐ Yes | ☒ **No** - Has heavy furniture (chests, stoves, ...) vibrated?  
☐ Yes | ☒ **No** - Did bells tinkle?  
☐ Yes | ☒ **No** - Did heavy furniture move?  
☐ Yes | ☒ **No** - Did light furniture tip over?  
☐ Yes | ☒ **No** - Have doors been moved on their hinges?

### Has it been observed

- ☒ **Yes** | ☐ No - Falling pieces of plaster from the ceilings?  
☐ Yes | ☒ **No** - Cracks in wall plaster?  
☒ **Yes** | ☐ No - An exceptional fall of a chimney in poor condition?  
☒ **Yes** | ☐ No - An exceptional fall of some bricks?  
☒ **Yes** | ☐ No - Have there been several damaged chimneys?

How many?: **4**

- ☐ Yes | ☒ **No** - Have there been several chimneys overturned?

How many?:

% for the municipality?:

- ☐ Yes | ☒ **No** - Have there been any falls of façade ornaments?

How important?:

- ☐ Yes | ☒ **No** - Have there been deep cracks in the brick walls?  
☐ Yes | ☒ **No** - Have there been deep cracks in the concrete walls?  
☐ Yes | ☒ **No** - Have there been landslides along the banks or slopes?

Importance:

ADDITIONAL COMMENTS:

## Official inquiry for MONS (BE)

Location: 50.455°N 3.948°E, at 3.8 km from the epicentre.

**Imin: 5 - Imax: 5**

### Did some residents perceive

- ☐ Yes | ☒ **No** - Light vibrations?  
☒ **Yes** | ☐ No - A characteristic noise: rumbling or rolling?

### Did many residents perceive

- ☒ **Yes** | ☐ No - A clear shaking of the building?  
☒ **Yes** | ☐ No - A loud rumble?

### Have we witnessed

- ☒ **Yes** | ☐ No - The oscillation of chandeliers or freely suspended objects?  
☒ **Yes** | ☐ No - Swinging chairs or beds?  
☒ **Yes** | ☐ No - Cracking ceilings?  
☐ Yes | ☒ **No** - Sleepers waking up?

### Has it been witnessed or later observed

- ☒ **Yes** | ☐ No - The shivering of windows and doors?  
☒ **Yes** | ☐ No - The shaking of movable objects (tables, vases, knick-knacks, ...)?

### Has it been witnessed or later observed

- ☒ **Yes** | ☐ No - The clattering of glasses and dishes in buffets?  
☒ **Yes** | ☐ No - The swaying of frames hanging on the wall?  
☒ **Yes** | ☐ No - The creaking of floors?  
☒ **Yes** | ☐ No - Small fragments of plaster falling from ceilings?  
☒ **Yes** | ☐ No - A confusion of the inhabitants (people leaving the house).

### Has it been observed

- ☐ Yes | ☒ **No** - Moving knick-knacks?  
☐ Yes | ☒ **No** - Moving light objects?  
 Which ones?:  
☐ Yes | ☒ **No** - The falling of frames hanging on the wall?  
☐ Yes | ☒ **No** - The falling of light objects placed on polished furniture or marble  
☒ **Yes** | ☐ No - Cracked or broken windows?  
☒ **Yes** | ☐ No - Broken crockery?  
☐ Yes | ☒ **No** - Light objects (vases, flower pots, etc.) spilled?  
☐ Yes | ☒ **No** - Has light furniture moved?  
☒ **Yes** | ☐ No - Has heavy furniture (chests, stoves, ...) vibrated?  
☐ Yes | ☒ **No** - Did bells tinkle?  
☐ Yes | ☒ **No** - Did heavy furniture move?  
☐ Yes | ☒ **No** - Did light furniture tip over?  
☐ Yes | ☒ **No** - Have doors been moved on their hinges?

### Has it been observed

- ☒ **Yes** | ☐ No - Falling pieces of plaster from the ceilings?  
☒ **Yes** | ☐ No - Cracks in wall plaster?  
☐ Yes | ☒ **No** - An exceptional fall of a chimney in poor condition?  
☒ **Yes** | ☐ No - An exceptional fall of some bricks?  
☒ **Yes** | ☐ No - Have there been several damaged chimneys?

How many?: **1**

- ☐ Yes | ☒ **No** - Have there been several chimneys overturned?

How many?:

% for the municipality?:

- ☐ Yes | ☒ **No** - Have there been any falls of façade ornaments?

How important?:

- ☐ Yes | ☒ **No** - Have there been deep cracks in the brick walls?  
☐ Yes | ☒ **No** - Have there been deep cracks in the concrete walls?  
☐ Yes | ☒ **No** - Have there been landslides along the banks or slopes?

Importance:

ADDITIONAL COMMENTS:

## Official inquiry for NIMY (BE)

Location: 50.473°N 3.959°E, at 5.6 km from the epicentre.

**Imin: 3 - Imax: 4**

---

### Did some residents perceive

- ☐ Yes | ☒ **No** - Light vibrations?  
☐ Yes | ☒ **No** - A characteristic noise: rumbling or rolling?

### Did many residents perceive

- ☐ Yes | ☒ **No** - A clear shaking of the building?  
☒ **Yes** | ☐ No - A loud rumble?

### Have we witnessed

- ☐ Yes | ☒ **No** - The oscillation of chandeliers or freely suspended objects?  
☐ Yes | ☒ **No** - Swinging chairs or beds?  
☐ Yes | ☒ **No** - Cracking ceilings?  
☐ Yes | ☒ **No** - Sleepers waking up?

### Has it been witnessed or later observed

- ☒ **Yes** | ☐ No - The shivering of windows and doors?  
☐ Yes | ☒ **No** - The shaking of movable objects (tables, vases, knick-knacks, ...)?

### Has it been witnessed or later observed

- ☐ Yes | ☒ **No** - The clattering of glasses and dishes in buffets?  
☐ Yes | ☒ **No** - The swaying of frames hanging on the wall?  
☐ Yes | ☒ **No** - The creaking of floors?  
☐ Yes | ☒ **No** - Small fragments of plaster falling from ceilings?  
☒ **Yes** | ☐ No - A confusion of the inhabitants (people leaving the house).

### Has it been observed

- ☐ Yes | ☒ **No** - Moving knick-knacks?  
☐ Yes | ☒ **No** - Moving light objects?  
 Which ones?:  
☐ Yes | ☒ **No** - The falling of frames hanging on the wall?  
☐ Yes | ☒ **No** - The falling of light objects placed on polished furniture or marble  
☐ Yes | ☒ **No** - Cracked or broken windows?  
☐ Yes | ☒ **No** - Broken crockery?  
☐ Yes | ☒ **No** - Light objects (vases, flower pots, etc.) spilled?  
☐ Yes | ☒ **No** - Has light furniture moved?  
☐ Yes | ☒ **No** - Has heavy furniture (chests, stoves, ...) vibrated?  
☐ Yes | ☒ **No** - Did bells tinkle?  
☐ Yes | ☒ **No** - Did heavy furniture move?  
☐ Yes | ☒ **No** - Did light furniture tip over?  
☐ Yes | ☒ **No** - Have doors been moved on their hinges?

### Has it been observed

- ☐ Yes | ☒ **No** - Falling pieces of plaster from the ceilings?  
☐ Yes | ☒ **No** - Cracks in wall plaster?  
☐ Yes | ☒ **No** - An exceptional fall of a chimney in poor condition?  
☐ Yes | ☒ **No** - An exceptional fall of some bricks?  
☐ Yes | ☒ **No** - Have there been several damaged chimneys?

How many?:

- ☐ Yes | ☒ **No** - Have there been several chimneys overturned?

How many?:

% for the municipality?:

- ☐ Yes | ☒ **No** - Have there been any falls of façade ornaments?

How important?:

- ☐ Yes | ☒ **No** - Have there been deep cracks in the brick walls?  
☐ Yes | ☒ **No** - Have there been deep cracks in the concrete walls?  
☐ Yes | ☒ **No** - Have there been landslides along the banks or slopes?

Importance:

ADDITIONAL COMMENTS:

## Official inquiry for NOIRCHAIN (BE)

Location: 50.402°N 3.933°E, at 4.9 km from the epicentre.

**Imin: 4 - Imax: 5**

### Did some residents perceive

- ☒ **Yes** | ☐ No - Light vibrations?  
☒ **Yes** | ☐ No - A characteristic noise: rumbling or rolling?

### Did many residents perceive

- ☐ Yes | ☒ **No** - A clear shaking of the building?  
☐ Yes | ☒ **No** - A loud rumble?

### Have we witnessed

- ☐ Yes | ☒ **No** - The oscillation of chandeliers or freely suspended objects?  
☐ Yes | ☒ **No** - Swinging chairs or beds?  
☐ Yes | ☒ **No** - Cracking ceilings?  
☐ Yes | ☒ **No** - Sleepers waking up?

### Has it been witnessed or later observed

- ☐ Yes | ☒ **No** - The shivering of windows and doors?  
☒ **Yes** | ☐ No - The shaking of movable objects (tables, vases, knick-knacks, ...)?

### Has it been witnessed or later observed

- ☐ Yes | ☒ **No** - The clattering of glasses and dishes in buffets?  
☐ Yes | ☒ **No** - The swaying of frames hanging on the wall?  
☐ Yes | ☒ **No** - The creaking of floors?  
☐ Yes | ☒ **No** - Small fragments of plaster falling from ceilings?  
☒ **Yes** | ☐ No - A confusion of the inhabitants (people leaving the house).

### Has it been observed

- ☐ Yes | ☒ **No** - Moving knick-knacks?  
☐ Yes | ☒ **No** - Moving light objects?  
 Which ones?:  
☐ Yes | ☒ **No** - The falling of frames hanging on the wall?  
☐ Yes | ☒ **No** - The falling of light objects placed on polished furniture or marble  
☐ Yes | ☒ **No** - Cracked or broken windows?  
☐ Yes | ☒ **No** - Broken crockery?  
☐ Yes | ☒ **No** - Light objects (vases, flower pots, etc.) spilled?  
☐ Yes | ☒ **No** - Has light furniture moved?  
☐ Yes | ☒ **No** - Has heavy furniture (chests, stoves, ...) vibrated?  
☐ Yes | ☒ **No** - Did bells tinkle?  
☐ Yes | ☒ **No** - Did heavy furniture move?  
☐ Yes | ☒ **No** - Did light furniture tip over?  
☐ Yes | ☒ **No** - Have doors been moved on their hinges?

### Has it been observed

- ☐ Yes | ☒ **No** - Falling pieces of plaster from the ceilings?  
☐ Yes | ☒ **No** - Cracks in wall plaster?  
☒ **Yes** | ☐ No - An exceptional fall of a chimney in poor condition?  
☒ **Yes** | ☐ No - An exceptional fall of some bricks?  
☒ **Yes** | ☐ No - Have there been several damaged chimneys?

How many?: **1**

- ☐ Yes | ☒ **No** - Have there been several chimneys overturned?

How many?:

% for the municipality?:

- ☐ Yes | ☒ **No** - Have there been any falls of façade ornaments?

How important?:

- ☐ Yes | ☒ **No** - Have there been deep cracks in the brick walls?  
☐ Yes | ☒ **No** - Have there been deep cracks in the concrete walls?  
☐ Yes | ☒ **No** - Have there been landslides along the banks or slopes?

Importance:

ADDITIONAL COMMENTS:

## Official inquiry for NOUVELLES (BE)

Location: 50.412°N 3.969°E, at 5.8 km from the epicentre.

**Imin: 4 - Imax: 4**

### Did some residents perceive

- ☐ Yes | ☒ **No** - Light vibrations?  
☐ Yes | ☒ **No** - A characteristic noise: rumbling or rolling?

### Did many residents perceive

- ☒ **Yes** | ☐ No - A clear shaking of the building?  
☐ Yes | ☒ **No** - A loud rumble?

### Have we witnessed

- ☐ Yes | ☒ **No** - The oscillation of chandeliers or freely suspended objects?  
☐ Yes | ☒ **No** - Swinging chairs or beds?  
☐ Yes | ☒ **No** - Cracking ceilings?  
☐ Yes | ☒ **No** - Sleepers waking up?

### Has it been witnessed or later observed

- ☒ **Yes** | ☐ No - The shivering of windows and doors?  
☒ **Yes** | ☐ No - The shaking of movable objects (tables, vases, knick-knacks, ...)?

### Has it been witnessed or later observed

- ☐ Yes | ☒ **No** - The clattering of glasses and dishes in buffets?  
☐ Yes | ☒ **No** - The swaying of frames hanging on the wall?  
☐ Yes | ☒ **No** - The creaking of floors?  
☐ Yes | ☒ **No** - Small fragments of plaster falling from ceilings?  
☒ **Yes** | ☐ No - A confusion of the inhabitants (people leaving the house).

### Has it been observed

- ☐ Yes | ☒ **No** - Moving knick-knacks?  
☐ Yes | ☒ **No** - Moving light objects?  
 Which ones?:  
☐ Yes | ☒ **No** - The falling of frames hanging on the wall?  
☐ Yes | ☒ **No** - The falling of light objects placed on polished furniture or marble  
☐ Yes | ☒ **No** - Cracked or broken windows?  
☐ Yes | ☒ **No** - Broken crockery?  
☐ Yes | ☒ **No** - Light objects (vases, flower pots, etc.) spilled?  
☐ Yes | ☒ **No** - Has light furniture moved?  
☐ Yes | ☒ **No** - Has heavy furniture (chests, stoves, ...) vibrated?  
☐ Yes | ☒ **No** - Did bells tinkle?  
☐ Yes | ☒ **No** - Did heavy furniture move?  
☐ Yes | ☒ **No** - Did light furniture tip over?  
☐ Yes | ☒ **No** - Have doors been moved on their hinges?

### Has it been observed

- ☐ Yes | ☒ **No** - Falling pieces of plaster from the ceilings?  
☐ Yes | ☒ **No** - Cracks in wall plaster?  
☐ Yes | ☒ **No** - An exceptional fall of a chimney in poor condition?  
☐ Yes | ☒ **No** - An exceptional fall of some bricks?  
☐ Yes | ☒ **No** - Have there been several damaged chimneys?

How many?:

- ☐ Yes | ☒ **No** - Have there been several chimneys overturned?

How many?:

% for the municipality?:

- ☐ Yes | ☒ **No** - Have there been any falls of façade ornaments?

How important?:

- ☐ Yes | ☒ **No** - Have there been deep cracks in the brick walls?  
☐ Yes | ☒ **No** - Have there been deep cracks in the concrete walls?  
☐ Yes | ☒ **No** - Have there been landslides along the banks or slopes?

Importance:

ADDITIONAL COMMENTS:

## Official inquiry for OBOURG (BE)

Location: 50.475°N 4.008°E, at 8.6 km from the epicentre.

**Imin: 4 - Imax: 4**

### Did some residents perceive

☒ **Yes** | ☐ No - Light vibrations?

☒ **Yes** | ☐ No - A characteristic noise: rumbling or rolling?

### Did many residents perceive

☐ Yes | ☒ **No** - A clear shaking of the building?

☒ **Yes** | ☐ No - A loud rumble?

### Have we witnessed

☐ Yes | ☒ **No** - The oscillation of chandeliers or freely suspended objects?

☐ Yes | ☒ **No** - Swinging chairs or beds?

☐ Yes | ☒ **No** - Cracking ceilings?

☐ Yes | ☒ **No** - Sleepers waking up?

### Has it been witnessed or later observed

☒ **Yes** | ☐ No - The shivering of windows and doors?

☒ **Yes** | ☐ No - The shaking of movable objects (tables, vases, knick-knacks, ...)?

### Has it been witnessed or later observed

☐ Yes | ☒ **No** - The clattering of glasses and dishes in buffets?

☐ Yes | ☒ **No** - The swaying of frames hanging on the wall?

☐ Yes | ☒ **No** - The creaking of floors?

☐ Yes | ☒ **No** - Small fragments of plaster falling from ceilings?

☐ Yes | ☒ **No** - A confusion of the inhabitants (people leaving the house).

### Has it been observed

☐ Yes | ☒ **No** - Moving knick-knacks?

☐ Yes | ☒ **No** - Moving light objects?

Which ones?:

☐ Yes | ☒ **No** - The falling of frames hanging on the wall?

☐ Yes | ☒ **No** - The falling of light objects placed on polished furniture or marble

☐ Yes | ☒ **No** - Cracked or broken windows?

☐ Yes | ☒ **No** - Broken crockery?

☐ Yes | ☒ **No** - Light objects (vases, flower pots, etc.) spilled?

☐ Yes | ☒ **No** - Has light furniture moved?

☐ Yes | ☒ **No** - Has heavy furniture (chests, stoves, ...) vibrated?

☐ Yes | ☒ **No** - Did bells tinkle?

☐ Yes | ☒ **No** - Did heavy furniture move?

☐ Yes | ☒ **No** - Did light furniture tip over?

☐ Yes | ☒ **No** - Have doors been moved on their hinges?

### Has it been observed

☐ Yes | ☒ **No** - Falling pieces of plaster from the ceilings?

☐ Yes | ☒ **No** - Cracks in wall plaster?

☐ Yes | ☒ **No** - An exceptional fall of a chimney in poor condition?

☐ Yes | ☒ **No** - An exceptional fall of some bricks?

☐ Yes | ☒ **No** - Have there been several damaged chimneys?

How many?:

☐ Yes | ☒ **No** - Have there been several chimneys overturned?

How many?:

% for the municipality?:

☐ Yes | ☒ **No** - Have there been any falls of façade ornaments?

How important?:

☐ Yes | ☒ **No** - Have there been deep cracks in the brick walls?

☐ Yes | ☒ **No** - Have there been deep cracks in the concrete walls?

☐ Yes | ☒ **No** - Have there been landslides along the banks or slopes?

Importance:

ADDITIONAL COMMENTS:

## Official inquiry for PATURAGES (BE)

Location: 50.414°N 3.862°E, at 4.0 km from the epicentre.

**Imin: 4 - Imax: 4**

### Did some residents perceive

- ☒ **Yes** | ☐ No - Light vibrations?  
☒ **Yes** | ☐ No - A characteristic noise: rumbling or rolling?

### Did many residents perceive

- ☐ Yes | ☒ **No** - A clear shaking of the building?  
☐ Yes | ☒ **No** - A loud rumble?

### Have we witnessed

- ☒ **Yes** | ☐ No - The oscillation of chandeliers or freely suspended objects?  
☐ Yes | ☒ **No** - Swinging chairs or beds?  
☐ Yes | ☒ **No** - Cracking ceilings?  
☐ Yes | ☒ **No** - Sleepers waking up?

### Has it been witnessed or later observed

- ☒ **Yes** | ☐ No - The shivering of windows and doors?  
☐ Yes | ☒ **No** - The shaking of movable objects (tables, vases, knick-knacks, ...)?

### Has it been witnessed or later observed

- ☐ Yes | ☒ **No** - The clattering of glasses and dishes in buffets?  
☐ Yes | ☒ **No** - The swaying of frames hanging on the wall?  
☐ Yes | ☒ **No** - The creaking of floors?  
☐ Yes | ☒ **No** - Small fragments of plaster falling from ceilings?  
☒ **Yes** | ☐ No - A confusion of the inhabitants (people leaving the house).

### Has it been observed

- ☐ Yes | ☒ **No** - Moving knick-knacks?  
☐ Yes | ☒ **No** - Moving light objects?  
 Which ones?:  
☐ Yes | ☒ **No** - The falling of frames hanging on the wall?  
☐ Yes | ☒ **No** - The falling of light objects placed on polished furniture or marble  
☐ Yes | ☒ **No** - Cracked or broken windows?  
☐ Yes | ☒ **No** - Broken crockery?  
☐ Yes | ☒ **No** - Light objects (vases, flower pots, etc.) spilled?  
☐ Yes | ☒ **No** - Has light furniture moved?  
☐ Yes | ☒ **No** - Has heavy furniture (chests, stoves, ...) vibrated?  
☐ Yes | ☒ **No** - Did bells tinkle?  
☐ Yes | ☒ **No** - Did heavy furniture move?  
☐ Yes | ☒ **No** - Did light furniture tip over?  
☐ Yes | ☒ **No** - Have doors been moved on their hinges?

### Has it been observed

- ☐ Yes | ☒ **No** - Falling pieces of plaster from the ceilings?  
☐ Yes | ☒ **No** - Cracks in wall plaster?  
☐ Yes | ☒ **No** - An exceptional fall of a chimney in poor condition?  
☐ Yes | ☒ **No** - An exceptional fall of some bricks?  
☐ Yes | ☒ **No** - Have there been several damaged chimneys?

How many?:

- ☐ Yes | ☒ **No** - Have there been several chimneys overturned?

How many?:

% for the municipality?:

- ☐ Yes | ☒ **No** - Have there been any falls of façade ornaments?

How important?:

- ☐ Yes | ☒ **No** - Have there been deep cracks in the brick walls?  
☐ Yes | ☒ **No** - Have there been deep cracks in the concrete walls?  
☐ Yes | ☒ **No** - Have there been landslides along the banks or slopes?

Importance:

ADDITIONAL COMMENTS:

## Official inquiry for QUAREGNON (BE)

Location: 50.443°N 3.865°E, at 2.5 km from the epicentre.

**Imin: 5 - Imax: 6**

### Did some residents perceive

- ☒ **Yes** | ☐ No - Light vibrations?  
☒ **Yes** | ☐ No - A characteristic noise: rumbling or rolling?

### Did many residents perceive

- ☒ **Yes** | ☐ No - A clear shaking of the building?  
☒ **Yes** | ☐ No - A loud rumble?

### Have we witnessed

- ☒ **Yes** | ☐ No - The oscillation of chandeliers or freely suspended objects?  
☒ **Yes** | ☐ No - Swinging chairs or beds?  
☐ Yes | ☒ **No** - Cracking ceilings?  
☒ **Yes** | ☐ No - Sleepers waking up?

### Has it been witnessed or later observed

- ☒ **Yes** | ☐ No - The shivering of windows and doors?  
☒ **Yes** | ☐ No - The shaking of movable objects (tables, vases, knick-knacks, ...)?

### Has it been witnessed or later observed

- ☐ Yes | ☒ **No** - The clattering of glasses and dishes in buffets?  
☒ **Yes** | ☐ No - The swaying of frames hanging on the wall?  
☐ Yes | ☒ **No** - The creaking of floors?  
☐ Yes | ☒ **No** - Small fragments of plaster falling from ceilings?  
☒ **Yes** | ☐ No - A confusion of the inhabitants (people leaving the house).

### Has it been observed

- ☐ Yes | ☒ **No** - Moving knick-knacks?  
☐ Yes | ☒ **No** - Moving light objects?  
 Which ones?:  
☐ Yes | ☒ **No** - The falling of frames hanging on the wall?  
☐ Yes | ☒ **No** - The falling of light objects placed on polished furniture or marble  
☒ **Yes** | ☐ No - Cracked or broken windows?  
☐ Yes | ☒ **No** - Broken crockery?  
☐ Yes | ☒ **No** - Light objects (vases, flower pots, etc.) spilled?  
☐ Yes | ☒ **No** - Has light furniture moved?  
☒ **Yes** | ☐ No - Has heavy furniture (chests, stoves, ...) vibrated?  
☐ Yes | ☒ **No** - Did bells tinkle?  
☐ Yes | ☒ **No** - Did heavy furniture move?  
☐ Yes | ☒ **No** - Did light furniture tip over?  
☐ Yes | ☒ **No** - Have doors been moved on their hinges?

### Has it been observed

- ☐ Yes | ☒ **No** - Falling pieces of plaster from the ceilings?  
☐ Yes | ☒ **No** - Cracks in wall plaster?  
☒ **Yes** | ☐ No - An exceptional fall of a chimney in poor condition?  
☒ **Yes** | ☐ No - An exceptional fall of some bricks?  
☒ **Yes** | ☐ No - Have there been several damaged chimneys?

How many?: **25**

- ☐ Yes | ☒ **No** - Have there been several chimneys overturned?

How many?:

% for the municipality?:

- ☐ Yes | ☒ **No** - Have there been any falls of façade ornaments?

How important?:

- ☐ Yes | ☒ **No** - Have there been deep cracks in the brick walls?  
☐ Yes | ☒ **No** - Have there been deep cracks in the concrete walls?  
☐ Yes | ☒ **No** - Have there been landslides along the banks or slopes?

Importance:

ADDITIONAL COMMENTS:

## Official inquiry for QUEVY-LE-GRAND (BE)

Location: 50.359°N 3.947°E, at 9.6 km from the epicentre.

**Imin: 2 - Imax: 2**

### Did some residents perceive

- ☐ Yes | ☒ **No** - Light vibrations?  
☒ **Yes** | ☐ No - A characteristic noise: rumbling or rolling?

### Did many residents perceive

- ☐ Yes | ☒ **No** - A clear shaking of the building?  
☐ Yes | ☒ **No** - A loud rumble?

### Have we witnessed

- ☐ Yes | ☒ **No** - The oscillation of chandeliers or freely suspended objects?  
☐ Yes | ☒ **No** - Swinging chairs or beds?  
☐ Yes | ☒ **No** - Cracking ceilings?  
☐ Yes | ☒ **No** - Sleepers waking up?

### Has it been witnessed or later observed

- ☐ Yes | ☒ **No** - The shivering of windows and doors?  
☐ Yes | ☒ **No** - The shaking of movable objects (tables, vases, knick-knacks, ...)?

### Has it been witnessed or later observed

- ☐ Yes | ☒ **No** - The clattering of glasses and dishes in buffets?  
☐ Yes | ☒ **No** - The swaying of frames hanging on the wall?  
☐ Yes | ☒ **No** - The creaking of floors?  
☐ Yes | ☒ **No** - Small fragments of plaster falling from ceilings?  
☐ Yes | ☒ **No** - A confusion of the inhabitants (people leaving the house).

### Has it been observed

- ☐ Yes | ☒ **No** - Moving knick-knacks?  
☐ Yes | ☒ **No** - Moving light objects?

Which ones?:

- ☐ Yes | ☒ **No** - The falling of frames hanging on the wall?  
☐ Yes | ☒ **No** - The falling of light objects placed on polished furniture or marble  
☐ Yes | ☒ **No** - Cracked or broken windows?  
☐ Yes | ☒ **No** - Broken crockery?  
☐ Yes | ☒ **No** - Light objects (vases, flower pots, etc.) spilled?  
☐ Yes | ☒ **No** - Has light furniture moved?  
☐ Yes | ☒ **No** - Has heavy furniture (chests, stoves, ...) vibrated?  
☐ Yes | ☒ **No** - Did bells tinkle?  
☐ Yes | ☒ **No** - Did heavy furniture move?  
☐ Yes | ☒ **No** - Did light furniture tip over?  
☐ Yes | ☒ **No** - Have doors been moved on their hinges?

### Has it been observed

- ☐ Yes | ☒ **No** - Falling pieces of plaster from the ceilings?  
☐ Yes | ☒ **No** - Cracks in wall plaster?  
☐ Yes | ☒ **No** - An exceptional fall of a chimney in poor condition?  
☐ Yes | ☒ **No** - An exceptional fall of some bricks?  
☐ Yes | ☒ **No** - Have there been several damaged chimneys?

How many?:

- ☐ Yes | ☒ **No** - Have there been several chimneys overturned?

How many?:

% for the municipality?:

- ☐ Yes | ☒ **No** - Have there been any falls of façade ornaments?

How important?:

- ☐ Yes | ☒ **No** - Have there been deep cracks in the brick walls?  
☐ Yes | ☒ **No** - Have there been deep cracks in the concrete walls?  
☐ Yes | ☒ **No** - Have there been landslides along the banks or slopes?

Importance:

ADDITIONAL COMMENTS:

## Official inquiry for QUEVY-LE-PETIT (BE)

Location: 50.367°N 3.939°E, at 8.6 km from the epicentre.

**Imin: 2 - Imax: 2**

### Did some residents perceive

- ☒ **Yes** | ☐ **No** - Light vibrations?  
☐ **Yes** | ☒ **No** - A characteristic noise: rumbling or rolling?

### Did many residents perceive

- ☐ **Yes** | ☒ **No** - A clear shaking of the building?  
☐ **Yes** | ☒ **No** - A loud rumble?

### Have we witnessed

- ☐ **Yes** | ☒ **No** - The oscillation of chandeliers or freely suspended objects?  
☐ **Yes** | ☒ **No** - Swinging chairs or beds?  
☐ **Yes** | ☒ **No** - Cracking ceilings?  
☐ **Yes** | ☒ **No** - Sleepers waking up?

### Has it been witnessed or later observed

- ☐ **Yes** | ☒ **No** - The shivering of windows and doors?  
☐ **Yes** | ☒ **No** - The shaking of movable objects (tables, vases, knick-knacks, ...)?

### Has it been witnessed or later observed

- ☐ **Yes** | ☒ **No** - The clattering of glasses and dishes in buffets?  
☐ **Yes** | ☒ **No** - The swaying of frames hanging on the wall?  
☐ **Yes** | ☒ **No** - The creaking of floors?  
☐ **Yes** | ☒ **No** - Small fragments of plaster falling from ceilings?  
☐ **Yes** | ☒ **No** - A confusion of the inhabitants (people leaving the house).

### Has it been observed

- ☐ **Yes** | ☒ **No** - Moving knick-knacks?  
☐ **Yes** | ☒ **No** - Moving light objects?  
 Which ones?:  
☐ **Yes** | ☒ **No** - The falling of frames hanging on the wall?  
☐ **Yes** | ☒ **No** - The falling of light objects placed on polished furniture or marble  
☐ **Yes** | ☒ **No** - Cracked or broken windows?  
☐ **Yes** | ☒ **No** - Broken crockery?  
☐ **Yes** | ☒ **No** - Light objects (vases, flower pots, etc.) spilled?  
☐ **Yes** | ☒ **No** - Has light furniture moved?  
☐ **Yes** | ☒ **No** - Has heavy furniture (chests, stoves, ...) vibrated?  
☐ **Yes** | ☒ **No** - Did bells tinkle?  
☐ **Yes** | ☒ **No** - Did heavy furniture move?  
☐ **Yes** | ☒ **No** - Did light furniture tip over?  
☐ **Yes** | ☒ **No** - Have doors been moved on their hinges?

### Has it been observed

- ☐ **Yes** | ☒ **No** - Falling pieces of plaster from the ceilings?  
☐ **Yes** | ☒ **No** - Cracks in wall plaster?  
☐ **Yes** | ☒ **No** - An exceptional fall of a chimney in poor condition?  
☐ **Yes** | ☒ **No** - An exceptional fall of some bricks?  
☐ **Yes** | ☒ **No** - Have there been several damaged chimneys?

How many?:

- ☐ **Yes** | ☒ **No** - Have there been several chimneys overturned?

How many?:

% for the municipality?:

- ☐ **Yes** | ☒ **No** - Have there been any falls of façade ornaments?

How important?:

- ☐ **Yes** | ☒ **No** - Have there been deep cracks in the brick walls?  
☐ **Yes** | ☒ **No** - Have there been deep cracks in the concrete walls?  
☐ **Yes** | ☒ **No** - Have there been landslides along the banks or slopes?

Importance:

ADDITIONAL COMMENTS:

## Official inquiry for SAINT-GHISLAIN (BE)

Location: 50.447°N 3.821°E, at 5.7 km from the epicentre.

**Imin: 3 - Imax: 3**

### Did some residents perceive

- ☒ **Yes** | ☐ No - Light vibrations?  
☒ **Yes** | ☐ No - A characteristic noise: rumbling or rolling?

### Did many residents perceive

- ☐ Yes | ☒ **No** - A clear shaking of the building?  
☐ Yes | ☒ **No** - A loud rumble?

### Have we witnessed

- ☐ Yes | ☒ **No** - The oscillation of chandeliers or freely suspended objects?  
☐ Yes | ☒ **No** - Swinging chairs or beds?  
☐ Yes | ☒ **No** - Cracking ceilings?  
☐ Yes | ☒ **No** - Sleepers waking up?

### Has it been witnessed or later observed

- ☐ Yes | ☒ **No** - The shivering of windows and doors?  
☐ Yes | ☒ **No** - The shaking of movable objects (tables, vases, knick-knacks, ...)?

### Has it been witnessed or later observed

- ☐ Yes | ☒ **No** - The clattering of glasses and dishes in buffets?  
☐ Yes | ☒ **No** - The swaying of frames hanging on the wall?  
☐ Yes | ☒ **No** - The creaking of floors?  
☐ Yes | ☒ **No** - Small fragments of plaster falling from ceilings?  
☒ **Yes** | ☐ No - A confusion of the inhabitants (people leaving the house).

### Has it been observed

- ☐ Yes | ☒ **No** - Moving knick-knacks?  
☐ Yes | ☒ **No** - Moving light objects?  
 Which ones?:  
☐ Yes | ☒ **No** - The falling of frames hanging on the wall?  
☐ Yes | ☒ **No** - The falling of light objects placed on polished furniture or marble  
☐ Yes | ☒ **No** - Cracked or broken windows?  
☐ Yes | ☒ **No** - Broken crockery?  
☐ Yes | ☒ **No** - Light objects (vases, flower pots, etc.) spilled?  
☐ Yes | ☒ **No** - Has light furniture moved?  
☐ Yes | ☒ **No** - Has heavy furniture (chests, stoves, ...) vibrated?  
☐ Yes | ☒ **No** - Did bells tinkle?  
☐ Yes | ☒ **No** - Did heavy furniture move?  
☐ Yes | ☒ **No** - Did light furniture tip over?  
☐ Yes | ☒ **No** - Have doors been moved on their hinges?

### Has it been observed

- ☐ Yes | ☒ **No** - Falling pieces of plaster from the ceilings?  
☐ Yes | ☒ **No** - Cracks in wall plaster?  
☐ Yes | ☒ **No** - An exceptional fall of a chimney in poor condition?  
☐ Yes | ☒ **No** - An exceptional fall of some bricks?  
☐ Yes | ☒ **No** - Have there been several damaged chimneys?

How many?:

- ☐ Yes | ☒ **No** - Have there been several chimneys overturned?

How many?:

% for the municipality?:

- ☐ Yes | ☒ **No** - Have there been any falls of façade ornaments?

How important?:

- ☐ Yes | ☒ **No** - Have there been deep cracks in the brick walls?  
☐ Yes | ☒ **No** - Have there been deep cracks in the concrete walls?  
☐ Yes | ☒ **No** - Have there been landslides along the banks or slopes?

Importance:

ADDITIONAL COMMENTS:

## Official inquiry for SAINT-SYMPHORIEN (BE)

Location: 50.438°N 4.007°E, at 7.6 km from the epicentre.

**Imin: 4 - Imax: 4**

### Did some residents perceive

- ☒ **Yes** | ☐ No - Light vibrations?  
☒ **Yes** | ☐ No - A characteristic noise: rumbling or rolling?

### Did many residents perceive

- ☒ **Yes** | ☐ No - A clear shaking of the building?  
☒ **Yes** | ☐ No - A loud rumble?

### Have we witnessed

- ☐ Yes | ☒ **No** - The oscillation of chandeliers or freely suspended objects?  
☐ Yes | ☒ **No** - Swinging chairs or beds?  
☐ Yes | ☒ **No** - Cracking ceilings?  
☐ Yes | ☒ **No** - Sleepers waking up?

### Has it been witnessed or later observed

- ☒ **Yes** | ☐ No - The shivering of windows and doors?  
☒ **Yes** | ☐ No - The shaking of movable objects (tables, vases, knick-knacks, ...)?

### Has it been witnessed or later observed

- ☒ **Yes** | ☐ No - The clattering of glasses and dishes in buffets?  
☐ Yes | ☒ **No** - The swaying of frames hanging on the wall?  
☐ Yes | ☒ **No** - The creaking of floors?  
☐ Yes | ☒ **No** - Small fragments of plaster falling from ceilings?  
☐ Yes | ☒ **No** - A confusion of the inhabitants (people leaving the house).

### Has it been observed

- ☐ Yes | ☒ **No** - Moving knick-knacks?  
☐ Yes | ☒ **No** - Moving light objects?  
 Which ones?:  
☐ Yes | ☒ **No** - The falling of frames hanging on the wall?  
☐ Yes | ☒ **No** - The falling of light objects placed on polished furniture or marble  
☐ Yes | ☒ **No** - Cracked or broken windows?  
☐ Yes | ☒ **No** - Broken crockery?  
☐ Yes | ☒ **No** - Light objects (vases, flower pots, etc.) spilled?  
☐ Yes | ☒ **No** - Has light furniture moved?  
☐ Yes | ☒ **No** - Has heavy furniture (chests, stoves, ...) vibrated?  
☐ Yes | ☒ **No** - Did bells tinkle?  
☐ Yes | ☒ **No** - Did heavy furniture move?  
☐ Yes | ☒ **No** - Did light furniture tip over?  
☐ Yes | ☒ **No** - Have doors been moved on their hinges?

### Has it been observed

- ☐ Yes | ☒ **No** - Falling pieces of plaster from the ceilings?  
☐ Yes | ☒ **No** - Cracks in wall plaster?  
☐ Yes | ☒ **No** - An exceptional fall of a chimney in poor condition?  
☐ Yes | ☒ **No** - An exceptional fall of some bricks?  
☐ Yes | ☒ **No** - Have there been several damaged chimneys?

How many?:

- ☐ Yes | ☒ **No** - Have there been several chimneys overturned?

How many?:

% for the municipality?:

- ☐ Yes | ☒ **No** - Have there been any falls of façade ornaments?

How important?:

- ☐ Yes | ☒ **No** - Have there been deep cracks in the brick walls?  
☐ Yes | ☒ **No** - Have there been deep cracks in the concrete walls?  
☐ Yes | ☒ **No** - Have there been landslides along the banks or slopes?

Importance:

ADDITIONAL COMMENTS:

## Official inquiry for SPIENNES (BE)

Location: 50.426°N 3.988°E, at 6.4 km from the epicentre.

**Imin: 4 - Imax: 4**

### Did some residents perceive

- ☐ Yes | ☒ **No** - Light vibrations?  
☐ Yes | ☒ **No** - A characteristic noise: rumbling or rolling?

### Did many residents perceive

- ☒ **Yes** | ☐ No - A clear shaking of the building?  
☒ **Yes** | ☐ No - A loud rumble?

### Have we witnessed

- ☐ Yes | ☒ **No** - The oscillation of chandeliers or freely suspended objects?  
☐ Yes | ☒ **No** - Swinging chairs or beds?  
☐ Yes | ☒ **No** - Cracking ceilings?  
☐ Yes | ☒ **No** - Sleepers waking up?

### Has it been witnessed or later observed

- ☒ **Yes** | ☐ No - The shivering of windows and doors?  
☒ **Yes** | ☐ No - The shaking of movable objects (tables, vases, knick-knacks, ...)?

### Has it been witnessed or later observed

- ☐ Yes | ☒ **No** - The clattering of glasses and dishes in buffets?  
☐ Yes | ☒ **No** - The swaying of frames hanging on the wall?  
☐ Yes | ☒ **No** - The creaking of floors?  
☐ Yes | ☒ **No** - Small fragments of plaster falling from ceilings?  
☐ Yes | ☒ **No** - A confusion of the inhabitants (people leaving the house).

### Has it been observed

- ☐ Yes | ☒ **No** - Moving knick-knacks?  
☐ Yes | ☒ **No** - Moving light objects?  
 Which ones?:  
☐ Yes | ☒ **No** - The falling of frames hanging on the wall?  
☐ Yes | ☒ **No** - The falling of light objects placed on polished furniture or marble  
☐ Yes | ☒ **No** - Cracked or broken windows?  
☐ Yes | ☒ **No** - Broken crockery?  
☐ Yes | ☒ **No** - Light objects (vases, flower pots, etc.) spilled?  
☐ Yes | ☒ **No** - Has light furniture moved?  
☐ Yes | ☒ **No** - Has heavy furniture (chests, stoves, ...) vibrated?  
☐ Yes | ☒ **No** - Did bells tinkle?  
☐ Yes | ☒ **No** - Did heavy furniture move?  
☐ Yes | ☒ **No** - Did light furniture tip over?  
☐ Yes | ☒ **No** - Have doors been moved on their hinges?

### Has it been observed

- ☐ Yes | ☒ **No** - Falling pieces of plaster from the ceilings?  
☐ Yes | ☒ **No** - Cracks in wall plaster?  
☐ Yes | ☒ **No** - An exceptional fall of a chimney in poor condition?  
☐ Yes | ☒ **No** - An exceptional fall of some bricks?  
☐ Yes | ☒ **No** - Have there been several damaged chimneys?

How many?:

- ☐ Yes | ☒ **No** - Have there been several chimneys overturned?

How many?:

% for the municipality?:

- ☐ Yes | ☒ **No** - Have there been any falls of façade ornaments?

How important?:

- ☐ Yes | ☒ **No** - Have there been deep cracks in the brick walls?  
☐ Yes | ☒ **No** - Have there been deep cracks in the concrete walls?  
☐ Yes | ☒ **No** - Have there been landslides along the banks or slopes?

Importance:

ADDITIONAL COMMENTS:

## Official inquiry for TERTRE (BE)

Location: 50.468°N 3.812°E, at 7.0 km from the epicentre.

**Imin: 4 - Imax: 4**

### Did some residents perceive

- ☐ Yes | ☒ **No** - Light vibrations?  
☐ Yes | ☒ **No** - A characteristic noise: rumbling or rolling?

### Did many residents perceive

- ☐ Yes | ☒ **No** - A clear shaking of the building?  
☒ **Yes** | ☐ No - A loud rumble?

### Have we witnessed

- ☒ **Yes** | ☐ No - The oscillation of chandeliers or freely suspended objects?  
☐ Yes | ☒ **No** - Swinging chairs or beds?  
☐ Yes | ☒ **No** - Cracking ceilings?  
☐ Yes | ☒ **No** - Sleepers waking up?

### Has it been witnessed or later observed

- ☒ **Yes** | ☐ No - The shivering of windows and doors?  
☒ **Yes** | ☐ No - The shaking of movable objects (tables, vases, knick-knacks, ...)?

### Has it been witnessed or later observed

- ☐ Yes | ☒ **No** - The clattering of glasses and dishes in buffets?  
☐ Yes | ☒ **No** - The swaying of frames hanging on the wall?  
☐ Yes | ☒ **No** - The creaking of floors?  
☐ Yes | ☒ **No** - Small fragments of plaster falling from ceilings?  
☒ **Yes** | ☐ No - A confusion of the inhabitants (people leaving the house).

### Has it been observed

- ☐ Yes | ☒ **No** - Moving knick-knacks?  
☐ Yes | ☒ **No** - Moving light objects?  
 Which ones?:  
☐ Yes | ☒ **No** - The falling of frames hanging on the wall?  
☐ Yes | ☒ **No** - The falling of light objects placed on polished furniture or marble  
☐ Yes | ☒ **No** - Cracked or broken windows?  
☐ Yes | ☒ **No** - Broken crockery?  
☐ Yes | ☒ **No** - Light objects (vases, flower pots, etc.) spilled?  
☐ Yes | ☒ **No** - Has light furniture moved?  
☐ Yes | ☒ **No** - Has heavy furniture (chests, stoves, ...) vibrated?  
☐ Yes | ☒ **No** - Did bells tinkle?  
☐ Yes | ☒ **No** - Did heavy furniture move?  
☐ Yes | ☒ **No** - Did light furniture tip over?  
☐ Yes | ☒ **No** - Have doors been moved on their hinges?

### Has it been observed

- ☐ Yes | ☒ **No** - Falling pieces of plaster from the ceilings?  
☐ Yes | ☒ **No** - Cracks in wall plaster?  
☐ Yes | ☒ **No** - An exceptional fall of a chimney in poor condition?  
☐ Yes | ☒ **No** - An exceptional fall of some bricks?  
☐ Yes | ☒ **No** - Have there been several damaged chimneys?

How many?:

- ☐ Yes | ☒ **No** - Have there been several chimneys overturned?

How many?:

% for the municipality?:

- ☐ Yes | ☒ **No** - Have there been any falls of façade ornaments?

How important?:

- ☐ Yes | ☒ **No** - Have there been deep cracks in the brick walls?  
☐ Yes | ☒ **No** - Have there been deep cracks in the concrete walls?  
☐ Yes | ☒ **No** - Have there been landslides along the banks or slopes?

Importance:

ADDITIONAL COMMENTS:

## Official inquiry for WARQUIGNIES (BE)

Location: 50.401°N 3.822°E, at 7.0 km from the epicentre.

**Imin: 2 - Imax: 2**

### Did some residents perceive

- ☒ **Yes** | ☐ **No** - Light vibrations?  
☐ **Yes** | ☒ **No** - A characteristic noise: rumbling or rolling?

### Did many residents perceive

- ☐ **Yes** | ☒ **No** - A clear shaking of the building?  
☐ **Yes** | ☒ **No** - A loud rumble?

### Have we witnessed

- ☐ **Yes** | ☒ **No** - The oscillation of chandeliers or freely suspended objects?  
☐ **Yes** | ☒ **No** - Swinging chairs or beds?  
☐ **Yes** | ☒ **No** - Cracking ceilings?  
☐ **Yes** | ☒ **No** - Sleepers waking up?

### Has it been witnessed or later observed

- ☐ **Yes** | ☒ **No** - The shivering of windows and doors?  
☐ **Yes** | ☒ **No** - The shaking of movable objects (tables, vases, knick-knacks, ...)?

### Has it been witnessed or later observed

- ☐ **Yes** | ☒ **No** - The clattering of glasses and dishes in buffets?  
☐ **Yes** | ☒ **No** - The swaying of frames hanging on the wall?  
☐ **Yes** | ☒ **No** - The creaking of floors?  
☐ **Yes** | ☒ **No** - Small fragments of plaster falling from ceilings?  
☐ **Yes** | ☒ **No** - A confusion of the inhabitants (people leaving the house).

### Has it been observed

- ☐ **Yes** | ☒ **No** - Moving knick-knacks?  
☐ **Yes** | ☒ **No** - Moving light objects?  
 Which ones?:  
☐ **Yes** | ☒ **No** - The falling of frames hanging on the wall?  
☐ **Yes** | ☒ **No** - The falling of light objects placed on polished furniture or marble  
☐ **Yes** | ☒ **No** - Cracked or broken windows?  
☐ **Yes** | ☒ **No** - Broken crockery?  
☐ **Yes** | ☒ **No** - Light objects (vases, flower pots, etc.) spilled?  
☐ **Yes** | ☒ **No** - Has light furniture moved?  
☐ **Yes** | ☒ **No** - Has heavy furniture (chests, stoves, ...) vibrated?  
☐ **Yes** | ☒ **No** - Did bells tinkle?  
☐ **Yes** | ☒ **No** - Did heavy furniture move?  
☐ **Yes** | ☒ **No** - Did light furniture tip over?  
☐ **Yes** | ☒ **No** - Have doors been moved on their hinges?

### Has it been observed

- ☐ **Yes** | ☒ **No** - Falling pieces of plaster from the ceilings?  
☐ **Yes** | ☒ **No** - Cracks in wall plaster?  
☐ **Yes** | ☒ **No** - An exceptional fall of a chimney in poor condition?  
☐ **Yes** | ☒ **No** - An exceptional fall of some bricks?  
☐ **Yes** | ☒ **No** - Have there been several damaged chimneys?

How many?:

- ☐ **Yes** | ☒ **No** - Have there been several chimneys overturned?

How many?:

% for the municipality?:

- ☐ **Yes** | ☒ **No** - Have there been any falls of façade ornaments?

How important?:

- ☐ **Yes** | ☒ **No** - Have there been deep cracks in the brick walls?  
☐ **Yes** | ☒ **No** - Have there been deep cracks in the concrete walls?  
☐ **Yes** | ☒ **No** - Have there been landslides along the banks or slopes?

Importance:

ADDITIONAL COMMENTS:

## Official inquiry for WASMES (BE)

Location: 50.422°N 3.847°E, at 4.3 km from the epicentre.

**Imin: 3 - Imax: 3**

### Did some residents perceive

- ☒ **Yes** | ☐ No - Light vibrations?  
☒ **Yes** | ☐ No - A characteristic noise: rumbling or rolling?

### Did many residents perceive

- ☐ Yes | ☒ **No** - A clear shaking of the building?  
☐ Yes | ☒ **No** - A loud rumble?

### Have we witnessed

- ☒ **Yes** | ☐ No - The oscillation of chandeliers or freely suspended objects?  
☐ Yes | ☒ **No** - Swinging chairs or beds?  
☐ Yes | ☒ **No** - Cracking ceilings?  
☐ Yes | ☒ **No** - Sleepers waking up?

### Has it been witnessed or later observed

- ☒ **Yes** | ☐ No - The shivering of windows and doors?  
☒ **Yes** | ☐ No - The shaking of movable objects (tables, vases, knick-knacks, ...)?

### Has it been witnessed or later observed

- ☐ Yes | ☒ **No** - The clattering of glasses and dishes in buffets?  
☐ Yes | ☒ **No** - The swaying of frames hanging on the wall?  
☐ Yes | ☒ **No** - The creaking of floors?  
☐ Yes | ☒ **No** - Small fragments of plaster falling from ceilings?  
☐ Yes | ☒ **No** - A confusion of the inhabitants (people leaving the house).

### Has it been observed

- ☐ Yes | ☒ **No** - Moving knick-knacks?  
☐ Yes | ☒ **No** - Moving light objects?  
 Which ones?:  
☐ Yes | ☒ **No** - The falling of frames hanging on the wall?  
☐ Yes | ☒ **No** - The falling of light objects placed on polished furniture or marble  
☐ Yes | ☒ **No** - Cracked or broken windows?  
☐ Yes | ☒ **No** - Broken crockery?  
☐ Yes | ☒ **No** - Light objects (vases, flower pots, etc.) spilled?  
☐ Yes | ☒ **No** - Has light furniture moved?  
☐ Yes | ☒ **No** - Has heavy furniture (chests, stoves, ...) vibrated?  
☐ Yes | ☒ **No** - Did bells tinkle?  
☐ Yes | ☒ **No** - Did heavy furniture move?  
☐ Yes | ☒ **No** - Did light furniture tip over?  
☐ Yes | ☒ **No** - Have doors been moved on their hinges?

### Has it been observed

- ☐ Yes | ☒ **No** - Falling pieces of plaster from the ceilings?  
☐ Yes | ☒ **No** - Cracks in wall plaster?  
☐ Yes | ☒ **No** - An exceptional fall of a chimney in poor condition?  
☐ Yes | ☒ **No** - An exceptional fall of some bricks?  
☐ Yes | ☒ **No** - Have there been several damaged chimneys?

How many?:

- ☐ Yes | ☒ **No** - Have there been several chimneys overturned?

How many?:

% for the municipality?:

- ☐ Yes | ☒ **No** - Have there been any falls of façade ornaments?

How important?:

- ☐ Yes | ☒ **No** - Have there been deep cracks in the brick walls?  
☐ Yes | ☒ **No** - Have there been deep cracks in the concrete walls?  
☐ Yes | ☒ **No** - Have there been landslides along the banks or slopes?

Importance:

ADDITIONAL COMMENTS:

## Official inquiry for WASMUEL (BE)

Location: 50.446°N 3.848°E, at 3.8 km from the epicentre.

**Imin: 5 - Imax: 5**

### Did some residents perceive

- ☒ **Yes** | ☐ No - Light vibrations?  
☐ Yes | ☒ **No** - A characteristic noise: rumbling or rolling?

### Did many residents perceive

- ☒ **Yes** | ☐ No - A clear shaking of the building?  
☐ Yes | ☒ **No** - A loud rumble?

### Have we witnessed

- ☐ Yes | ☒ **No** - The oscillation of chandeliers or freely suspended objects?  
☒ **Yes** | ☐ No - Swinging chairs or beds?  
☐ Yes | ☒ **No** - Cracking ceilings?  
☐ Yes | ☒ **No** - Sleepers waking up?

### Has it been witnessed or later observed

- ☐ Yes | ☒ **No** - The shivering of windows and doors?  
☐ Yes | ☒ **No** - The shaking of movable objects (tables, vases, knick-knacks, ...)?

### Has it been witnessed or later observed

- ☐ Yes | ☒ **No** - The clattering of glasses and dishes in buffets?  
☐ Yes | ☒ **No** - The swaying of frames hanging on the wall?  
☐ Yes | ☒ **No** - The creaking of floors?  
☐ Yes | ☒ **No** - Small fragments of plaster falling from ceilings?  
☒ **Yes** | ☐ No - A confusion of the inhabitants (people leaving the house).

### Has it been observed

- ☐ Yes | ☒ **No** - Moving knick-knacks?  
☐ Yes | ☒ **No** - Moving light objects?  
 Which ones?:  
☐ Yes | ☒ **No** - The falling of frames hanging on the wall?  
☐ Yes | ☒ **No** - The falling of light objects placed on polished furniture or marble  
☐ Yes | ☒ **No** - Cracked or broken windows?  
☐ Yes | ☒ **No** - Broken crockery?  
☐ Yes | ☒ **No** - Light objects (vases, flower pots, etc.) spilled?  
☐ Yes | ☒ **No** - Has light furniture moved?  
☐ Yes | ☒ **No** - Has heavy furniture (chests, stoves, ...) vibrated?  
☐ Yes | ☒ **No** - Did bells tinkle?  
☐ Yes | ☒ **No** - Did heavy furniture move?  
☐ Yes | ☒ **No** - Did light furniture tip over?  
☐ Yes | ☒ **No** - Have doors been moved on their hinges?

### Has it been observed

- ☐ Yes | ☒ **No** - Falling pieces of plaster from the ceilings?  
☐ Yes | ☒ **No** - Cracks in wall plaster?  
☐ Yes | ☒ **No** - An exceptional fall of a chimney in poor condition?  
☒ **Yes** | ☐ No - An exceptional fall of some bricks?  
☒ **Yes** | ☐ No - Have there been several damaged chimneys?

How many?: **2**

- ☐ Yes | ☒ **No** - Have there been several chimneys overturned?

How many?:

% for the municipality?:

- ☐ Yes | ☒ **No** - Have there been any falls of façade ornaments?

How important?:

- ☐ Yes | ☒ **No** - Have there been deep cracks in the brick walls?  
☐ Yes | ☒ **No** - Have there been deep cracks in the concrete walls?  
☐ Yes | ☒ **No** - Have there been landslides along the banks or slopes?

Importance:

ADDITIONAL COMMENTS:
