# Supplementary material for: The damaging character of shallow 20th century earthquakes in the Hainaut coal area (Belgium)
Source: Copernicus journal article supplement (doi:10.5194/se-2021-74), 2021-07-13
Supplement: Supplementary file 1 [file se-2021-74-supplement.zip › 582_1965-12-15_STREPY-BRACQUEGNIES.csv]

Imin	Imax	lat	lon	Commune	d_epi	azimuth
4	4	50.5286	4.1542	MIGNAULT	9.07394570707	15.500651716
4	4	50.5828	4.4175	HOUTAIN-LE-VAL	25.7573781121	54.888802236
2	2	50.6706	4.0375	OISQUERCQ	25.22620723	346.632427821
3	3	50.6925	4.0192	MARCQ	27.9048685384	345.211822848
3	3	50.3325	4.3531	GOZEE	21.1093445558	128.165769613
3	3	50.346	4.267	LOBBES	15.5909380749	137.846174547
2	2	50.37	4.1111	FAUROEULX	8.92141645198	184.069889205
3	3	50.375	4.2344	MONT-SAINTE-GENEVIEVE	11.6500985508	135.690298853
5	5	50.38	4.1522	VELLEREILLE-LES-BRAYEUX	8.11597478682	163.608242197
5	5	50.4128	4.1681	BINCHE	5.36687440783	140.428076988
5	5	50.4356	4.1456	PERONNES-LEZ-BINCHE	2.42337945246	131.365287254
5	5	50.4733	4.0933	THIEU	3.2112351078	323.825550431
5	5	50.4794	4.0611	VILLE-SUR-HAINE	5.30894740898	308.048501539
3	3	50.5461	4.1828	MARCHE-LEZ-ECAUSSINNES	11.5814952348	22.6030732995
3	4	50.6128	4.1375	BRAINE-LE-COMTE	18.1522128466	3.91274738214
2	2	50.6392	4.1703	HENNUYERES	21.3463824774	9.59551856544
2	2	50.6814	4.2994	WAUTHIER-BRAINE	28.7080976691	26.2105477557
2	2	50.695	4.2061	TUBIZE	27.9279951655	12.5816544681
4	4	50.4033	4.2056	EPINOIS	7.9990404547	130.465298178
5	5	50.4233	4.1919	RESSAIX	5.90877919206	120.14767417
5	5	50.4253	4.225	LEVAL-TRAHEGNIES	7.94941285984	110.179856193
5	5	50.4603	4.0833	BOUSSOIT	2.84703205204	293.744732981
5	5	50.4781	4.1903	LA LOUVIERE	5.8894757627	57.9173461896
5	5	50.4831	4.1511	HOUDENG-AIMERIES	4.29332189176	30.9391559519
5	5	50.4839	4.1564	HOUDENG-GOEGNIES	4.57155743349	34.4100025871
3	3	50.4922	4.4075	VIESVILLE	20.9432605062	76.9367736996
4	4	50.5219	4.2119	FAMILLEUREUX	10.3202508019	39.1608755498
3	4	50.5517	4.1033	NAAST	11.374851964	354.027518548
3	4	50.5628	4.2517	FELUY	15.6439464101	36.6197863736
2	2	50.5981	4.4436	LOUPOIGNE	28.2488701637	54.1998774027
2	2	50.6103	4.4419	VIEUX-GENAPPE	28.963839265	51.876573134
4	4	50.4081	4.2703	ANDERLUES	11.6524123233	113.519581713
5	5	50.4289	4.2328	MONT-SAINTE-ALDEGONDE	8.34998733726	106.281879894
6	6	50.4475	4.1467	TRIVIERES	1.91668115843	98.3322872828
5	5	50.4553	4.1897	HAINE-SAINT-PAUL	4.98510312887	83.1811817574
5	5	50.4558	4.2061	HAINE-SAINT-PIERRE	6.1487622273	83.9437702814
3	3	50.4414	4.2981	PIETON	12.6866940608	94.2558451075
4	4	50.4747	4.2386	LA HESTRE	8.85817766364	71.8845505831
2	2	50.4847	4.2561	BELLECOURT	10.405306276	68.1726456961
4	4	50.4906	4.2283	FAYT-LEZ-MANAGE	8.91694267796	59.5284929844
3	3	50.4953	4.2867	GODARVILLE	12.8622804683	66.8708938207
3	3	50.4422	4.2561	CARNIERES	9.70606193811	95.0762144243
5	5	50.4558	4.2442	MORLANWELZ-MARIEMONT	8.84424424002	85.7687286253
2	2	50.3714	3.8794	SARS-LA-BRUYERE	19.2078759847	243.015627466
2	2	50.4136	3.8622	PATURAGES	18.7592699983	257.634455689
3	3	50.5636	3.9439	MONTIGNIES-LEZ-LENS	17.7692630659	315.396990515
2	2	50.355	4.1722	MERBES-SAINTE-MARIE	11.2002158681	160.62921398
2	2	50.3594	3.9469	QUEVY-LE-GRAND	15.9061549697	230.750888677
3	3	50.3869	3.9419	BOUGNIES	14.4737007102	241.059283389
3	3	50.4106	3.8942	FRAMERIES	16.6317940227	254.808236218
2	2	50.4431	3.8653	QUAREGNON	18.1074752607	267.66881409
3	3	50.5131	4.0161	CHAUSSEE-NOTRE-DAME-LOUVIGNIES	10.1809524053	313.625719293
3	3	50.3511	4.1203	PEISSANT	11.0013376823	179.888798748
3	3	50.3611	4.0758	CROIX-LEZ-ROUVEROY	10.3761742176	197.644680296
3	3	50.35	4.05	ROUVEROY	12.1863067594	204.13160438
3	3	50.38	4.03	GIVRY	10.0772703681	219.438743169
3	3	50.3956	3.9878	HARVENG	11.1749912254	237.264879217
2	2	50.4019	4.0578	VELLEREILLE-LE-SEC	6.94002505817	219.583409312
3	3	50.4028	3.9586	ASQUILLIES	12.6136896113	245.464412223
5	5	50.4131	4.1519	WAUDREZ	4.68887019885	151.08060831
3	3	50.4494	3.8878	JEMAPPES	16.4920796433	269.857647387
5	5	50.5028	4.1094	LE ROEULX	5.92137999288	352.703688457
2	2	50.586	4.072	SOIGNIES	15.5068000451	347.336823503
3	4	50.5997	3.9406	LOMBISE	20.9558022962	322.691254689
4	4	50.4119	4.1058	ESTINNES-AU-VAL	4.3565857823	193.396288485
4	4	50.4203	3.9447	CIPLY	12.8851952136	255.21108322
4	4	50.4258	3.9875	SPIENNES	9.79047596173	254.09170881
4	4	50.4414	3.9664	HYON	10.9521823359	265.048200035
2	2	50.4494	3.8878	FLENU	16.4920796433	269.857647387
4	4	50.455	3.948	MONS	12.2281919429	272.673260819
2	2	50.4733	3.9594	NIMY	11.6945318458	282.866630236
4	4	50.5153	4.0497	THIEUSIES	8.81246540885	325.5418082
2	2	50.3836	4.0831	HAULCHIN	7.83793918799	199.562874171
5	5	50.3972	4.0978	ESTINNES-AU-MONT	6.08151481193	195.04372316
3	3	50.4044	4.0194	HARMIGNIES	8.76528300864	234.68001886
4	4	50.4272	3.9608	MESVIN	11.5906704527	257.4219229
5	5	50.4294	4.0406	VILLERS-SAINT-GHISLAIN	6.08825082918	247.921009072
7	7	50.4311	4.1075	BRAY	2.28222518814	202.902429516
3	3	50.4381	3.92	CUESMES	14.2681778505	264.753846928
6	6	50.4556	4.1025	MAURAGE	1.39022494792	296.627292234
4	4	50.4747	4.0081	OBOURG	8.40719741622	289.118565189
7	7	50.4747	4.1242	STREPY-BRACQUEGNIES	2.76371505745	6.19306376134
4	4	50.4381	4.0072	SAINT-SYMPHORIEN	8.12115543514	260.662566986
4	4	50.4664	4.0467	HAVRE	5.51561418141	289.342694074
2	2	50.7022	4.145	BIERGHES	28.1106003984	3.60220258625
3	3	50.6347	4.6119	MONT-SAINT-GUIBERT	40.4717110123	59.3021735288
2	2	51.054	3.729	GENT	72.6360424358	337.824756525
3	3	50.693	4.04	ENGHIEN	27.6190512197	348.189782276
3	4	50.6433	4.07	STEENKERQUE	21.7927050621	350.660171198
2	2	50.5058	3.79	SIRAULT	24.2326618279	284.968714071
3	4	50.4125	3.9689	NOUVELLES	11.5179230218	248.824972362
3	3	50.6706	4.0361	HOVES	25.2493805269	346.413985308
3	3	50.3619	3.9856	HAVAY	13.6867923268	224.325251769
3	3	50.6322	3.9986	GRATY	22.0191783507	337.040619789
3	3	50.6117	4.4517	GENAPPE	29.6085750841	52.4627292616
3	3	50.6903	4.2219	CLABECQ	27.6886135065	15.0735698894
2	2	49.9667	4.2667	FORGE-PHILIPPE	54.7694130024	168.920433033
3	3	50.6167	3.6167	GRANDMETZ	40.2141990999	297.653466106
2	2	50.315	4.186	LABUISSIERE	15.7335291971	162.615390592
