# Supplementary material for: The damaging character of shallow 20th century earthquakes in the Hainaut coal area (Belgium)
Source: Copernicus journal article supplement (doi:10.5194/se-2021-74), 2021-07-13
Supplement: Supplementary file 1 [file se-2021-74-supplement.zip › 582_ROB_official_report.pdf]

# Royal Observatory of Belgium Official Macroseismic Inquiry

**STREPY-BRACQUEGNIES**

1965-12-15 12:07:14

Magnitude  $M_w=4$

50.45°N 4.12°E 2.7 km

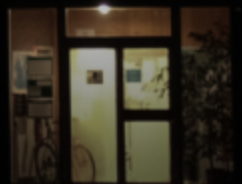



# Official Inquiries

|                                | Country | Latitude | Longitude | Epicentral Distance | Imin | Imax |
|--------------------------------|---------|----------|-----------|---------------------|------|------|
| ANDERLUES                      | BE      | 50.408   | 4.27      | 11.7                | 4    | 4    |
| ASQUILLIES                     | BE      | 50.403   | 3.959     | 12.6                | 3    | 3    |
| BELLE COURT                    | BE      | 50.485   | 4.256     | 10.4                | 2    | 2    |
| BIERGHES                       | BE      | 50.702   | 4.145     | 28.1                | 2    | 2    |
| BINCHE                         | BE      | 50.413   | 4.168     | 5.4                 | 5    | 5    |
| BOUGNIES                       | BE      | 50.387   | 3.942     | 14.5                | 3    | 3    |
| BOUSSOIT                       | BE      | 50.46    | 4.083     | 2.8                 | 5    | 5    |
| BRAINE-LE-COMTE                | BE      | 50.613   | 4.138     | 18.2                | 3    | 4    |
| BRAY                           | BE      | 50.431   | 4.108     | 2.3                 | 7    | 7    |
| CARNIERES                      | BE      | 50.442   | 4.256     | 9.7                 | 3    | 3    |
| CHAUSSÉE-NOTRE-DAME-LOUVIGNIES | BE      | 50.513   | 4.016     | 10.2                | 3    | 3    |
| CIPLY                          | BE      | 50.42    | 3.945     | 12.9                | 4    | 4    |
| CLABECQ                        | BE      | 50.69    | 4.222     | 27.7                | 3    | 3    |
| CROIX-LEZ-ROUVEROY             | BE      | 50.361   | 4.076     | 10.4                | 3    | 3    |
| CUESMES                        | BE      | 50.438   | 3.92      | 14.3                | 3    | 3    |
| EPINOIS                        | BE      | 50.403   | 4.206     | 8                   | 4    | 4    |
| ESTINNES-AU-MONT               | BE      | 50.397   | 4.098     | 6.1                 | 5    | 5    |
| ESTINNES-AU-VAL                | BE      | 50.412   | 4.106     | 4.4                 | 4    | 4    |
| FAMILLEUREUX                   | BE      | 50.522   | 4.212     | 10.3                | 4    | 4    |
| FAUROEULX                      | BE      | 50.37    | 4.111     | 8.9                 | 2    | 2    |
| FAYT-LEZ-MANAGE                | BE      | 50.491   | 4.228     | 8.9                 | 4    | 4    |
| FELUY                          | BE      | 50.563   | 4.252     | 15.6                | 3    | 4    |
| FLENU                          | BE      | 50.449   | 3.888     | 16.5                | 2    | 2    |
| FORGE-PHILIPPE                 | BE      | 49.966   | 4.256     | 54.8                | 2    | 2    |
| FRAMERIES                      | BE      | 50.411   | 3.894     | 16.6                | 3    | 3    |
| GENAPPE                        | BE      | 50.612   | 4.452     | 29.6                | 3    | 3    |
| GIVRY                          | BE      | 50.38    | 4.03      | 10.1                | 3    | 3    |
| GODARVILLE                     | BE      | 50.495   | 4.287     | 12.9                | 3    | 3    |
| GOZEE                          | BE      | 50.332   | 4.353     | 21.1                | 3    | 3    |
| GRANDMETZ                      | BE      | 50.623   | 3.633     | 40.2                | 3    | 3    |
| GRATY                          | BE      | 50.632   | 3.999     | 22                  | 3    | 3    |
| HAINE-SAINT-PAUL               | BE      | 50.455   | 4.19      | 5                   | 5    | 5    |
| HAINE-SAINT-PIERRE             | BE      | 50.456   | 4.206     | 6.1                 | 5    | 5    |
| HARMIGNIES                     | BE      | 50.404   | 4.019     | 8.8                 | 3    | 3    |
| HARVENG                        | BE      | 50.396   | 3.988     | 11.2                | 3    | 3    |
| HAULCHIN                       | BE      | 50.384   | 4.083     | 7.8                 | 2    | 2    |
| HAVAY                          | BE      | 50.362   | 3.986     | 13.7                | 3    | 3    |
| HAVRE                          | BE      | 50.466   | 4.047     | 5.5                 | 4    | 4    |
| HENNUYERES                     | BE      | 50.639   | 4.17      | 21.3                | 2    | 2    |
| HOUDENG-AIMERIES               | BE      | 50.483   | 4.151     | 4.3                 | 5    | 5    |
| HOUDENG-GOEGNIES               | BE      | 50.484   | 4.156     | 4.6                 | 5    | 5    |
| HOUTAIN-LE-VAL                 | BE      | 50.583   | 4.418     | 25.8                | 4    | 4    |
| HOVES                          | BE      | 50.671   | 4.036     | 25.2                | 3    | 3    |
| HYON                           | BE      | 50.441   | 3.966     | 11                  | 4    | 4    |
| JEMAPPES                       | BE      | 50.449   | 3.888     | 16.5                | 3    | 3    |
| LA HESTRE                      | BE      | 50.475   | 4.239     | 8.9                 | 4    | 4    |
| LA LOUVIERE                    | BE      | 50.478   | 4.19      | 5.9                 | 5    | 5    |
| LABUISSIÈRE                    | BE      | 50.315   | 4.186     | 15.7                | 2    | 2    |
| LE ROEULX                      | BE      | 50.503   | 4.109     | 5.9                 | 5    | 5    |
| LEVAL-TRAHEGNIES               | BE      | 50.425   | 4.225     | 7.9                 | 5    | 5    |
| LOBBES                         | BE      | 50.346   | 4.267     | 15.6                | 3    | 3    |
| LOMBISE                        | BE      | 50.6     | 3.941     | 21                  | 3    | 4    |
| LOUPOIGNE                      | BE      | 50.598   | 4.444     | 28.2                | 2    | 2    |
| MARCHE-LEZ-ECAUSSINNES         | BE      | 50.546   | 4.183     | 11.6                | 3    | 3    |

|                         | Country | Latitude | Longitude | Epicentral Distance | Imin | Imax |
|-------------------------|---------|----------|-----------|---------------------|------|------|
| MARCQ                   | BE      | 50.692   | 4.019     | 27.9                | 3    | 3    |
| MAURAGE                 | BE      | 50.456   | 4.102     | 1.4                 | 6    | 6    |
| MERBES-SAINTE-MARIE     | BE      | 50.355   | 4.172     | 11.2                | 2    | 2    |
| MESVIN                  | BE      | 50.427   | 3.961     | 11.6                | 4    | 4    |
| MIGNAULT                | BE      | 50.529   | 4.154     | 9.1                 | 4    | 4    |
| MONS                    | BE      | 50.455   | 3.948     | 12.2                | 4    | 4    |
| MONT-SAINT-GUIBERT      | BE      | 50.635   | 4.612     | 40.5                | 3    | 3    |
| MONT-SAINT-ALDEGONDE    | BE      | 50.429   | 4.233     | 8.3                 | 5    | 5    |
| MONT-SAINT-GENEVIEVE    | BE      | 50.375   | 4.234     | 11.7                | 3    | 3    |
| MORLANWELZ-MARIEMONT    | BE      | 50.456   | 4.244     | 8.8                 | 5    | 5    |
| NAAST                   | BE      | 50.552   | 4.103     | 11.4                | 3    | 4    |
| NIMY                    | BE      | 50.473   | 3.959     | 11.7                | 2    | 2    |
| NOUVELLES               | BE      | 50.412   | 3.969     | 11.5                | 3    | 4    |
| OBOURG                  | BE      | 50.475   | 4.008     | 8.4                 | 4    | 4    |
| OISQUERCQ               | BE      | 50.671   | 4.037     | 25.2                | 2    | 2    |
| PATURAGES               | BE      | 50.414   | 3.862     | 18.8                | 2    | 2    |
| PEISSANT                | BE      | 50.351   | 4.12      | 11                  | 3    | 3    |
| PERONNES-LEZ-BINCHE     | BE      | 50.436   | 4.146     | 2.4                 | 5    | 5    |
| PIETON                  | BE      | 50.441   | 4.298     | 12.7                | 3    | 3    |
| QUAREGNON               | BE      | 50.443   | 3.865     | 18.1                | 2    | 2    |
| QUEVY-LE-GRAND          | BE      | 50.359   | 3.947     | 15.9                | 2    | 2    |
| RESSAIX                 | BE      | 50.423   | 4.192     | 5.9                 | 5    | 5    |
| ROUVEROY                | BE      | 50.357   | 4.067     | 12.2                | 3    | 3    |
| SAINT-SYMPHORIEN        | BE      | 50.438   | 4.007     | 8.1                 | 4    | 4    |
| SARS-LA-BRUYERE         | BE      | 50.371   | 3.879     | 19.2                | 2    | 2    |
| SIRAULT                 | BE      | 50.506   | 3.79      | 24.2                | 2    | 2    |
| SOIGNIES                | BE      | 50.586   | 4.072     | 15.5                | 2    | 2    |
| SPIENNES                | BE      | 50.426   | 3.988     | 9.8                 | 4    | 4    |
| STEENKERQUE             | BE      | 50.643   | 4.07      | 21.8                | 3    | 4    |
| STREPY-BRACQUEGNIES     | BE      | 50.475   | 4.124     | 2.8                 | 7    | 7    |
| THIEU                   | BE      | 50.473   | 4.093     | 3.2                 | 5    | 5    |
| THIEUSIES               | BE      | 50.515   | 4.05      | 8.8                 | 4    | 4    |
| TRIVIERES               | BE      | 50.448   | 4.147     | 1.9                 | 6    | 6    |
| TUBIZE                  | BE      | 50.695   | 4.206     | 27.9                | 2    | 2    |
| VELLEREILLE-LE-SEC      | BE      | 50.402   | 4.058     | 6.9                 | 2    | 2    |
| VELLEREILLE-LES-BRAYEUX | BE      | 50.38    | 4.152     | 8.1                 | 5    | 5    |
| VIESVILLE               | BE      | 50.492   | 4.408     | 20.9                | 3    | 3    |
| VIEUX-GENAPPE           | BE      | 50.61    | 4.442     | 29                  | 2    | 2    |
| VILLE-SUR-HAINE         | BE      | 50.479   | 4.061     | 5.3                 | 5    | 5    |
| VILLERS-SAINT-GHISLAIN  | BE      | 50.429   | 4.041     | 6.1                 | 5    | 5    |
| WAUDREZ                 | BE      | 50.413   | 4.152     | 4.7                 | 5    | 5    |
| WAUTHIER-BRAINE         | BE      | 50.681   | 4.299     | 28.7                | 2    | 2    |



# Additional Intensities from other sources

|           | Imin | Imax | Latitude | Longitude | Commune             | Epicentral Distance |
|-----------|------|------|----------|-----------|---------------------|---------------------|
| <b>87</b> | 3    | 3    | 50.693   | 4.040     | ENGHIEN             | 27.6                |
| <b>86</b> | 2    | 2    | 51.054   | 3.729     | GENT                | 72.6                |
| <b>45</b> | 3    | 3    | 50.564   | 3.944     | MONTIGNIES-LEZ-LENS | 17.8                |

# Individual Formulaires

## Official inquiry for ANDERLUES (BE)

Location: 50.408°N 4.27°E, at 11.7 km from the epicentre.

**Imin: 4 - Imax: 4**

### Did some residents perceive

- ☒ **Yes** | ☐ No - Light vibrations?  
☐ Yes | ☒ **No** - A characteristic noise: rumbling or rolling?

### Did many residents perceive

- ☐ Yes | ☒ **No** - A clear shaking of the building?  
☐ Yes | ☒ **No** - A loud rumble?

### Have we witnessed

- ☐ Yes | ☒ **No** - The oscillation of chandeliers or freely suspended objects?  
☐ Yes | ☒ **No** - Swinging chairs or beds?  
☐ Yes | ☒ **No** - Cracking ceilings?  
☒ **Yes** | ☐ No - Sleepers waking up?

### Has it been witnessed or later observed

- ☒ **Yes** | ☐ No - The shivering of windows and doors?  
☒ **Yes** | ☐ No - The shaking of movable objects (tables, vases, knick-knacks, ...)?

### Has it been witnessed or later observed

- ☒ **Yes** | ☐ No - The clattering of glasses and dishes in buffets?  
☐ Yes | ☒ **No** - The swaying of frames hanging on the wall?  
☐ Yes | ☒ **No** - The creaking of floors?  
☐ Yes | ☒ **No** - Small fragments of plaster falling from ceilings?  
☐ Yes | ☒ **No** - A confusion of the inhabitants (people leaving the house).

### Has it been observed

- ☐ Yes | ☒ **No** - Moving knick-knacks?  
☐ Yes | ☒ **No** - Moving light objects?  
 Which ones?:  
☐ Yes | ☒ **No** - The falling of frames hanging on the wall?  
☐ Yes | ☒ **No** - The falling of light objects placed on polished furniture or marble  
☐ Yes | ☒ **No** - Cracked or broken windows?  
☐ Yes | ☒ **No** - Broken crockery?  
☐ Yes | ☒ **No** - Light objects (vases, flower pots, etc.) spilled?  
☐ Yes | ☒ **No** - Has light furniture moved?  
☒ **Yes** | ☐ No - Has heavy furniture (chests, stoves, ...) vibrated?  
☐ Yes | ☒ **No** - Did bells tinkle?  
☐ Yes | ☒ **No** - Did heavy furniture move?  
☐ Yes | ☒ **No** - Did light furniture tip over?  
☐ Yes | ☒ **No** - Have doors been moved on their hinges?

### Has it been observed

- ☐ Yes | ☒ **No** - Falling pieces of plaster from the ceilings?  
☐ Yes | ☒ **No** - Cracks in wall plaster?  
☐ Yes | ☒ **No** - An exceptional fall of a chimney in poor condition?  
☐ Yes | ☒ **No** - An exceptional fall of some bricks?  
☐ Yes | ☒ **No** - Have there been several damaged chimneys?

How many?:

- ☐ Yes | ☒ **No** - Have there been several chimneys overturned?

How many?:

% for the municipality?:

- ☐ Yes | ☒ **No** - Have there been any falls of façade ornaments?

How important?:

- ☐ Yes | ☒ **No** - Have there been deep cracks in the brick walls?  
☐ Yes | ☒ **No** - Have there been deep cracks in the concrete walls?  
☐ Yes | ☒ **No** - Have there been landslides along the banks or slopes?

Importance:

ADDITIONAL COMMENTS:

## Official inquiry for ASQUILLIES (BE)

Location: 50.403°N 3.959°E, at 12.6 km from the epicentre.

**Imin: 3 - Imax: 3**

### Did some residents perceive

- ☒ **Yes** | ☐ **No** - Light vibrations?  
☐ **Yes** | ☒ **No** - A characteristic noise: rumbling or rolling?

### Did many residents perceive

- ☐ **Yes** | ☒ **No** - A clear shaking of the building?  
☐ **Yes** | ☒ **No** - A loud rumble?

### Have we witnessed

- ☐ **Yes** | ☒ **No** - The oscillation of chandeliers or freely suspended objects?  
☐ **Yes** | ☒ **No** - Swinging chairs or beds?  
☐ **Yes** | ☒ **No** - Cracking ceilings?  
☐ **Yes** | ☒ **No** - Sleepers waking up?

### Has it been witnessed or later observed

- ☒ **Yes** | ☐ **No** - The shivering of windows and doors?  
☐ **Yes** | ☒ **No** - The shaking of movable objects (tables, vases, knick-knacks, ...)?

### Has it been witnessed or later observed

- ☐ **Yes** | ☒ **No** - The clattering of glasses and dishes in buffets?  
☐ **Yes** | ☒ **No** - The swaying of frames hanging on the wall?  
☐ **Yes** | ☒ **No** - The creaking of floors?  
☐ **Yes** | ☒ **No** - Small fragments of plaster falling from ceilings?  
☐ **Yes** | ☒ **No** - A confusion of the inhabitants (people leaving the house).

### Has it been observed

- ☐ **Yes** | ☒ **No** - Moving knick-knacks?  
☐ **Yes** | ☒ **No** - Moving light objects?  
 Which ones?:  
☐ **Yes** | ☒ **No** - The falling of frames hanging on the wall?  
☐ **Yes** | ☒ **No** - The falling of light objects placed on polished furniture or marble  
☐ **Yes** | ☒ **No** - Cracked or broken windows?  
☐ **Yes** | ☒ **No** - Broken crockery?  
☐ **Yes** | ☒ **No** - Light objects (vases, flower pots, etc.) spilled?  
☐ **Yes** | ☒ **No** - Has light furniture moved?  
☐ **Yes** | ☒ **No** - Has heavy furniture (chests, stoves, ...) vibrated?  
☐ **Yes** | ☒ **No** - Did bells tinkle?  
☐ **Yes** | ☒ **No** - Did heavy furniture move?  
☐ **Yes** | ☒ **No** - Did light furniture tip over?  
☐ **Yes** | ☒ **No** - Have doors been moved on their hinges?

### Has it been observed

- ☐ **Yes** | ☒ **No** - Falling pieces of plaster from the ceilings?  
☐ **Yes** | ☒ **No** - Cracks in wall plaster?  
☐ **Yes** | ☒ **No** - An exceptional fall of a chimney in poor condition?  
☐ **Yes** | ☒ **No** - An exceptional fall of some bricks?  
☐ **Yes** | ☒ **No** - Have there been several damaged chimneys?

How many?:

- ☐ **Yes** | ☒ **No** - Have there been several chimneys overturned?

How many?:

% for the municipality?:

- ☐ **Yes** | ☒ **No** - Have there been any falls of façade ornaments?

How important?:

- ☐ **Yes** | ☒ **No** - Have there been deep cracks in the brick walls?  
☐ **Yes** | ☒ **No** - Have there been deep cracks in the concrete walls?  
☐ **Yes** | ☒ **No** - Have there been landslides along the banks or slopes?

Importance:

ADDITIONAL COMMENTS:

## Official inquiry for BELLECOURT (BE)

Location: 50.485°N 4.256°E, at 10.4 km from the epicentre.

**Imin: 2 - Imax: 2**

### Did some residents perceive

- ☒ **Yes** | ☐ **No** - Light vibrations?  
☐ **Yes** | ☒ **No** - A characteristic noise: rumbling or rolling?

### Did many residents perceive

- ☐ **Yes** | ☒ **No** - A clear shaking of the building?  
☐ **Yes** | ☒ **No** - A loud rumble?

### Have we witnessed

- ☐ **Yes** | ☒ **No** - The oscillation of chandeliers or freely suspended objects?  
☐ **Yes** | ☒ **No** - Swinging chairs or beds?  
☐ **Yes** | ☒ **No** - Cracking ceilings?  
☐ **Yes** | ☒ **No** - Sleepers waking up?

### Has it been witnessed or later observed

- ☐ **Yes** | ☒ **No** - The shivering of windows and doors?  
☐ **Yes** | ☒ **No** - The shaking of movable objects (tables, vases, knick-knacks, ...)?

### Has it been witnessed or later observed

- ☐ **Yes** | ☒ **No** - The clattering of glasses and dishes in buffets?  
☐ **Yes** | ☒ **No** - The swaying of frames hanging on the wall?  
☐ **Yes** | ☒ **No** - The creaking of floors?  
☐ **Yes** | ☒ **No** - Small fragments of plaster falling from ceilings?  
☐ **Yes** | ☒ **No** - A confusion of the inhabitants (people leaving the house).

### Has it been observed

- ☐ **Yes** | ☒ **No** - Moving knick-knacks?  
☐ **Yes** | ☒ **No** - Moving light objects?  
 Which ones?:  
☐ **Yes** | ☒ **No** - The falling of frames hanging on the wall?  
☐ **Yes** | ☒ **No** - The falling of light objects placed on polished furniture or marble  
☐ **Yes** | ☒ **No** - Cracked or broken windows?  
☐ **Yes** | ☒ **No** - Broken crockery?  
☐ **Yes** | ☒ **No** - Light objects (vases, flower pots, etc.) spilled?  
☐ **Yes** | ☒ **No** - Has light furniture moved?  
☐ **Yes** | ☒ **No** - Has heavy furniture (chests, stoves, ...) vibrated?  
☐ **Yes** | ☒ **No** - Did bells tinkle?  
☐ **Yes** | ☒ **No** - Did heavy furniture move?  
☐ **Yes** | ☒ **No** - Did light furniture tip over?  
☐ **Yes** | ☒ **No** - Have doors been moved on their hinges?

### Has it been observed

- ☐ **Yes** | ☒ **No** - Falling pieces of plaster from the ceilings?  
☐ **Yes** | ☒ **No** - Cracks in wall plaster?  
☐ **Yes** | ☒ **No** - An exceptional fall of a chimney in poor condition?  
☐ **Yes** | ☒ **No** - An exceptional fall of some bricks?  
☐ **Yes** | ☒ **No** - Have there been several damaged chimneys?

How many?:

- ☐ **Yes** | ☒ **No** - Have there been several chimneys overturned?

How many?:

% for the municipality?:

- ☐ **Yes** | ☒ **No** - Have there been any falls of façade ornaments?

How important?:

- ☐ **Yes** | ☒ **No** - Have there been deep cracks in the brick walls?  
☐ **Yes** | ☒ **No** - Have there been deep cracks in the concrete walls?  
☐ **Yes** | ☒ **No** - Have there been landslides along the banks or slopes?

Importance:

ADDITIONAL COMMENTS:

## Official inquiry for BIERGHES (BE)

Location: 50.702°N 4.145°E, at 28.1 km from the epicentre.

**Imin: 2 - Imax: 2**

### Did some residents perceive

- ☒ **Yes** | ☐ No - Light vibrations?  
☐ Yes | ☒ **No** - A characteristic noise: rumbling or rolling?

### Did many residents perceive

- ☐ Yes | ☒ **No** - A clear shaking of the building?  
☐ Yes | ☒ **No** - A loud rumble?

### Have we witnessed

- ☐ Yes | ☒ **No** - The oscillation of chandeliers or freely suspended objects?  
☐ Yes | ☒ **No** - Swinging chairs or beds?  
☐ Yes | ☒ **No** - Cracking ceilings?  
☐ Yes | ☒ **No** - Sleepers waking up?

### Has it been witnessed or later observed

- ☐ Yes | ☒ **No** - The shivering of windows and doors?  
☐ Yes | ☒ **No** - The shaking of movable objects (tables, vases, knick-knacks, ...)?

### Has it been witnessed or later observed

- ☐ Yes | ☒ **No** - The clattering of glasses and dishes in buffets?  
☐ Yes | ☒ **No** - The swaying of frames hanging on the wall?  
☐ Yes | ☒ **No** - The creaking of floors?  
☐ Yes | ☒ **No** - Small fragments of plaster falling from ceilings?  
☐ Yes | ☒ **No** - A confusion of the inhabitants (people leaving the house).

### Has it been observed

- ☐ Yes | ☒ **No** - Moving knick-knacks?  
☐ Yes | ☒ **No** - Moving light objects?  
 Which ones?:  
☐ Yes | ☒ **No** - The falling of frames hanging on the wall?  
☐ Yes | ☒ **No** - The falling of light objects placed on polished furniture or marble  
☐ Yes | ☒ **No** - Cracked or broken windows?  
☐ Yes | ☒ **No** - Broken crockery?  
☐ Yes | ☒ **No** - Light objects (vases, flower pots, etc.) spilled?  
☐ Yes | ☒ **No** - Has light furniture moved?  
☐ Yes | ☒ **No** - Has heavy furniture (chests, stoves, ...) vibrated?  
☐ Yes | ☒ **No** - Did bells tinkle?  
☐ Yes | ☒ **No** - Did heavy furniture move?  
☐ Yes | ☒ **No** - Did light furniture tip over?  
☐ Yes | ☒ **No** - Have doors been moved on their hinges?

### Has it been observed

- ☐ Yes | ☒ **No** - Falling pieces of plaster from the ceilings?  
☐ Yes | ☒ **No** - Cracks in wall plaster?  
☐ Yes | ☒ **No** - An exceptional fall of a chimney in poor condition?  
☐ Yes | ☒ **No** - An exceptional fall of some bricks?  
☐ Yes | ☒ **No** - Have there been several damaged chimneys?

How many?:

- ☐ Yes | ☒ **No** - Have there been several chimneys overturned?

How many?:

% for the municipality?:

- ☐ Yes | ☒ **No** - Have there been any falls of façade ornaments?

How important?:

- ☐ Yes | ☒ **No** - Have there been deep cracks in the brick walls?  
☐ Yes | ☒ **No** - Have there been deep cracks in the concrete walls?  
☐ Yes | ☒ **No** - Have there been landslides along the banks or slopes?

Importance:

ADDITIONAL COMMENTS: **Il est à noter que la population est habituée aux petites secousses provenant des mines dans la carrière de porphyre et que, de ce fait, les légères secousses du 15.12.65 seront passées inaperçues.**

## Official inquiry for BINCHE (BE)

Location: 50.413°N 4.168°E, at 5.4 km from the epicentre.

Imin: 5 - Imax: 5

### Did some residents perceive

- ☒ **Yes** | ☐ No - Light vibrations?  
☒ **Yes** | ☐ No - A characteristic noise: rumbling or rolling?

### Did many residents perceive

- ☒ **Yes** | ☐ No - A clear shaking of the building?  
☐ Yes | ☒ **No** - A loud rumble?

### Have we witnessed

- ☒ **Yes** | ☐ No - The oscillation of chandeliers or freely suspended objects?  
☒ **Yes** | ☐ No - Swinging chairs or beds?  
☐ Yes | ☒ **No** - Cracking ceilings?  
☒ **Yes** | ☐ No - Sleepers waking up?

### Has it been witnessed or later observed

- ☒ **Yes** | ☐ No - The shivering of windows and doors?  
☒ **Yes** | ☐ No - The shaking of movable objects (tables, vases, knick-knacks, ...)?

### Has it been witnessed or later observed

- ☒ **Yes** | ☐ No - The clattering of glasses and dishes in buffets?  
☒ **Yes** | ☐ No - The swaying of frames hanging on the wall?  
☐ Yes | ☒ **No** - The creaking of floors?  
☐ Yes | ☒ **No** - Small fragments of plaster falling from ceilings?  
☒ **Yes** | ☐ No - A confusion of the inhabitants (people leaving the house).

### Has it been observed

- ☒ **Yes** | ☐ No - Moving knick-knacks?  
☒ **Yes** | ☐ No - Moving light objects?  
 Which ones?: **Verres sur la table de nuit.**  
☐ Yes | ☒ **No** - The falling of frames hanging on the wall?  
☒ **Yes** | ☐ No - The falling of light objects placed on polished furniture or marble  
☒ **Yes** | ☐ No - Cracked or broken windows?  
☐ Yes | ☒ **No** - Broken crockery?  
☐ Yes | ☒ **No** - Light objects (vases, flower pots, etc.) spilled?  
☐ Yes | ☒ **No** - Has light furniture moved?  
☒ **Yes** | ☐ No - Has heavy furniture (chests, stoves, ...) vibrated?  
☐ Yes | ☒ **No** - Did bells tinkle?  
☐ Yes | ☒ **No** - Did heavy furniture move?  
☐ Yes | ☒ **No** - Did light furniture tip over?  
☐ Yes | ☒ **No** - Have doors been moved on their hinges?

### Has it been observed

- ☐ Yes | ☒ **No** - Falling pieces of plaster from the ceilings?  
☐ Yes | ☒ **No** - Cracks in wall plaster?  
☒ **Yes** | ☐ No - An exceptional fall of a chimney in poor condition?  
☒ **Yes** | ☐ No - An exceptional fall of some bricks?  
☒ **Yes** | ☐ No - Have there been several damaged chimneys?

How many?: **une dizaine**

- ☒ **Yes** | ☐ No - Have there been several chimneys overturned?

How many?:

% for the municipality?: **2**

- ☐ Yes | ☒ **No** - Have there been any falls of façade ornaments?

How important?:

- ☐ Yes | ☒ **No** - Have there been deep cracks in the brick walls?  
☐ Yes | ☒ **No** - Have there been deep cracks in the concrete walls?  
☐ Yes | ☒ **No** - Have there been landslides along the banks or slopes?

Importance:

ADDITIONAL COMMENTS:

## Official inquiry for BOUGNIES (BE)

Location: 50.387°N 3.942°E, at 14.5 km from the epicentre.

**Imin: 3 - Imax: 3**

### Did some residents perceive

- ☒ **Yes** | ☐ No - Light vibrations?  
☐ Yes | ☒ **No** - A characteristic noise: rumbling or rolling?

### Did many residents perceive

- ☐ Yes | ☒ **No** - A clear shaking of the building?  
☐ Yes | ☒ **No** - A loud rumble?

### Have we witnessed

- ☐ Yes | ☒ **No** - The oscillation of chandeliers or freely suspended objects?  
☐ Yes | ☒ **No** - Swinging chairs or beds?  
☐ Yes | ☒ **No** - Cracking ceilings?  
☐ Yes | ☒ **No** - Sleepers waking up?

### Has it been witnessed or later observed

- ☒ **Yes** | ☐ No - The shivering of windows and doors?  
☐ Yes | ☒ **No** - The shaking of movable objects (tables, vases, knick-knacks, ...)?

### Has it been witnessed or later observed

- ☐ Yes | ☒ **No** - The clattering of glasses and dishes in buffets?  
☐ Yes | ☒ **No** - The swaying of frames hanging on the wall?  
☐ Yes | ☒ **No** - The creaking of floors?  
☐ Yes | ☒ **No** - Small fragments of plaster falling from ceilings?  
☐ Yes | ☒ **No** - A confusion of the inhabitants (people leaving the house).

### Has it been observed

- ☐ Yes | ☒ **No** - Moving knick-knacks?  
☐ Yes | ☒ **No** - Moving light objects?  
 Which ones?:  
☐ Yes | ☒ **No** - The falling of frames hanging on the wall?  
☐ Yes | ☒ **No** - The falling of light objects placed on polished furniture or marble  
☐ Yes | ☒ **No** - Cracked or broken windows?  
☐ Yes | ☒ **No** - Broken crockery?  
☐ Yes | ☒ **No** - Light objects (vases, flower pots, etc.) spilled?  
☐ Yes | ☒ **No** - Has light furniture moved?  
☐ Yes | ☒ **No** - Has heavy furniture (chests, stoves, ...) vibrated?  
☐ Yes | ☒ **No** - Did bells tinkle?  
☐ Yes | ☒ **No** - Did heavy furniture move?  
☐ Yes | ☒ **No** - Did light furniture tip over?  
☐ Yes | ☒ **No** - Have doors been moved on their hinges?

### Has it been observed

- ☐ Yes | ☒ **No** - Falling pieces of plaster from the ceilings?  
☐ Yes | ☒ **No** - Cracks in wall plaster?  
☐ Yes | ☒ **No** - An exceptional fall of a chimney in poor condition?  
☐ Yes | ☒ **No** - An exceptional fall of some bricks?  
☐ Yes | ☒ **No** - Have there been several damaged chimneys?

How many?:

- ☐ Yes | ☒ **No** - Have there been several chimneys overturned?

How many?:

% for the municipality?:

- ☐ Yes | ☒ **No** - Have there been any falls of façade ornaments?

How important?:

- ☐ Yes | ☒ **No** - Have there been deep cracks in the brick walls?  
☐ Yes | ☒ **No** - Have there been deep cracks in the concrete walls?  
☐ Yes | ☒ **No** - Have there been landslides along the banks or slopes?

Importance:

ADDITIONAL COMMENTS:

## Official inquiry for BOUSSOIT (BE)

Location: 50.46°N 4.083°E, at 2.8 km from the epicentre.

Imin: 5 - Imax: 5

### Did some residents perceive

- ☒ **Yes** | ☐ No - Light vibrations?  
☒ **Yes** | ☐ No - A characteristic noise: rumbling or rolling?

### Did many residents perceive

- ☒ **Yes** | ☐ No - A clear shaking of the building?  
☒ **Yes** | ☐ No - A loud rumble?

### Have we witnessed

- ☒ **Yes** | ☐ No - The oscillation of chandeliers or freely suspended objects?  
☒ **Yes** | ☐ No - Swinging chairs or beds?  
☐ Yes | ☒ **No** - Cracking ceilings?  
☒ **Yes** | ☐ No - Sleepers waking up?

### Has it been witnessed or later observed

- ☒ **Yes** | ☐ No - The shivering of windows and doors?  
☒ **Yes** | ☐ No - The shaking of movable objects (tables, vases, knick-knacks, ...)?

### Has it been witnessed or later observed

- ☒ **Yes** | ☐ No - The clattering of glasses and dishes in buffets?  
☐ Yes | ☒ **No** - The swaying of frames hanging on the wall?  
☐ Yes | ☒ **No** - The creaking of floors?  
☐ Yes | ☒ **No** - Small fragments of plaster falling from ceilings?  
☒ **Yes** | ☐ No - A confusion of the inhabitants (people leaving the house).

### Has it been observed

- ☒ **Yes** | ☐ No - Moving knick-knacks?  
☒ **Yes** | ☐ No - Moving light objects?  
 Which ones?: **bonbonnières, photos (cadres).**  
☐ Yes | ☒ **No** - The falling of frames hanging on the wall?  
☐ Yes | ☒ **No** - The falling of light objects placed on polished furniture or marble  
☐ Yes | ☒ **No** - Cracked or broken windows?  
☐ Yes | ☒ **No** - Broken crockery?  
☐ Yes | ☒ **No** - Light objects (vases, flower pots, etc.) spilled?  
☐ Yes | ☒ **No** - Has light furniture moved?  
☒ **Yes** | ☐ No - Has heavy furniture (chests, stoves, ...) vibrated?  
☐ Yes | ☒ **No** - Did bells tinkle?  
☐ Yes | ☒ **No** - Did heavy furniture move?  
☐ Yes | ☒ **No** - Did light furniture tip over?  
☐ Yes | ☒ **No** - Have doors been moved on their hinges?

### Has it been observed

- ☐ Yes | ☒ **No** - Falling pieces of plaster from the ceilings?  
☐ Yes | ☒ **No** - Cracks in wall plaster?  
☒ **Yes** | ☐ No - An exceptional fall of a chimney in poor condition?  
☒ **Yes** | ☐ No - An exceptional fall of some bricks?  
☒ **Yes** | ☐ No - Have there been several damaged chimneys?

How many?: **deux**

- ☐ Yes | ☒ **No** - Have there been several chimneys overturned?

How many?:

% for the municipality?:

- ☐ Yes | ☒ **No** - Have there been any falls of façade ornaments?

How important?:

- ☐ Yes | ☒ **No** - Have there been deep cracks in the brick walls?  
☐ Yes | ☒ **No** - Have there been deep cracks in the concrete walls?  
☐ Yes | ☒ **No** - Have there been landslides along the banks or slopes?

Importance:

ADDITIONAL COMMENTS:

## Official inquiry for BRAINE-LE-COMTE (BE)

Location: 50.613°N 4.138°E, at 18.2 km from the epicentre.

**Imin: 3 - Imax: 4**

### Did some residents perceive

- ☒ **Yes** | ☐ No - Light vibrations?  
☒ **Yes** | ☐ No - A characteristic noise: rumbling or rolling?

### Did many residents perceive

- ☐ Yes | ☒ **No** - A clear shaking of the building?  
☐ Yes | ☒ **No** - A loud rumble?

### Have we witnessed

- ☒ **Yes** | ☐ No - The oscillation of chandeliers or freely suspended objects?  
☒ **Yes** | ☐ No - Swinging chairs or beds?  
☐ Yes | ☒ **No** - Cracking ceilings?  
☒ **Yes** | ☐ No - Sleepers waking up?

### Has it been witnessed or later observed

- ☒ **Yes** | ☐ No - The shivering of windows and doors?  
☒ **Yes** | ☐ No - The shaking of movable objects (tables, vases, knick-knacks, ...)?

### Has it been witnessed or later observed

- ☐ Yes | ☒ **No** - The clattering of glasses and dishes in buffets?  
☐ Yes | ☒ **No** - The swaying of frames hanging on the wall?  
☐ Yes | ☒ **No** - The creaking of floors?  
☐ Yes | ☒ **No** - Small fragments of plaster falling from ceilings?  
☐ Yes | ☒ **No** - A confusion of the inhabitants (people leaving the house).

### Has it been observed

- ☐ Yes | ☒ **No** - Moving knick-knacks?  
☐ Yes | ☒ **No** - Moving light objects?  
 Which ones?:  
☐ Yes | ☒ **No** - The falling of frames hanging on the wall?  
☐ Yes | ☒ **No** - The falling of light objects placed on polished furniture or marble  
☐ Yes | ☒ **No** - Cracked or broken windows?  
☐ Yes | ☒ **No** - Broken crockery?  
☐ Yes | ☒ **No** - Light objects (vases, flower pots, etc.) spilled?  
☐ Yes | ☒ **No** - Has light furniture moved?  
☐ Yes | ☒ **No** - Has heavy furniture (chests, stoves, ...) vibrated?  
☐ Yes | ☒ **No** - Did bells tinkle?  
☐ Yes | ☒ **No** - Did heavy furniture move?  
☐ Yes | ☒ **No** - Did light furniture tip over?  
☐ Yes | ☒ **No** - Have doors been moved on their hinges?

### Has it been observed

- ☐ Yes | ☒ **No** - Falling pieces of plaster from the ceilings?  
☐ Yes | ☒ **No** - Cracks in wall plaster?  
☐ Yes | ☒ **No** - An exceptional fall of a chimney in poor condition?  
☐ Yes | ☒ **No** - An exceptional fall of some bricks?  
☐ Yes | ☒ **No** - Have there been several damaged chimneys?

How many?:

- ☐ Yes | ☒ **No** - Have there been several chimneys overturned?

How many?:

% for the municipality?:

- ☐ Yes | ☒ **No** - Have there been any falls of façade ornaments?

How important?:

- ☐ Yes | ☒ **No** - Have there been deep cracks in the brick walls?  
☐ Yes | ☒ **No** - Have there been deep cracks in the concrete walls?  
☐ Yes | ☒ **No** - Have there been landslides along the banks or slopes?

Importance:

ADDITIONAL COMMENTS:

## Official inquiry for BRAY (BE)

Location: 50.431°N 4.108°E, at 2.3 km from the epicentre.

**Imin: 7 - Imax: 7**

### Did some residents perceive

- ☒ **Yes** | ☐ No - Light vibrations?  
☒ **Yes** | ☐ No - A characteristic noise: rumbling or rolling?

### Did many residents perceive

- ☒ **Yes** | ☐ No - A clear shaking of the building?  
☒ **Yes** | ☐ No - A loud rumble?

### Have we witnessed

- ☒ **Yes** | ☐ No - The oscillation of chandeliers or freely suspended objects?  
☒ **Yes** | ☐ No - Swinging chairs or beds?  
☒ **Yes** | ☐ No - Cracking ceilings?  
☒ **Yes** | ☐ No - Sleepers waking up?

### Has it been witnessed or later observed

- ☒ **Yes** | ☐ No - The shivering of windows and doors?  
☒ **Yes** | ☐ No - The shaking of movable objects (tables, vases, knick-knacks, ...)?

### Has it been witnessed or later observed

- ☒ **Yes** | ☐ No - The clattering of glasses and dishes in buffets?  
☒ **Yes** | ☐ No - The swaying of frames hanging on the wall?  
☐ Yes | ☒ **No** - The creaking of floors?  
☒ **Yes** | ☐ No - Small fragments of plaster falling from ceilings?  
☒ **Yes** | ☐ No - A confusion of the inhabitants (people leaving the house).

### Has it been observed

- ☒ **Yes** | ☐ No - Moving knick-knacks?  
☒ **Yes** | ☐ No - Moving light objects?  
 Which ones?: **pots de fleurs, vases, etc.**  
☒ **Yes** | ☐ No - The falling of frames hanging on the wall?  
☒ **Yes** | ☐ No - The falling of light objects placed on polished furniture or marble  
☒ **Yes** | ☐ No - Cracked or broken windows?  
☐ Yes | ☒ **No** - Broken crockery?  
☒ **Yes** | ☐ No - Light objects (vases, flower pots, etc.) spilled?  
☒ **Yes** | ☐ No - Has light furniture moved?  
☒ **Yes** | ☐ No - Has heavy furniture (chests, stoves, ...) vibrated?  
☐ Yes | ☒ **No** - Did bells tinkle?  
☐ Yes | ☒ **No** - Did heavy furniture move?  
☒ **Yes** | ☐ No - Did light furniture tip over?  
☐ Yes | ☒ **No** - Have doors been moved on their hinges?

### Has it been observed

- ☒ **Yes** | ☐ No - Falling pieces of plaster from the ceilings?  
☒ **Yes** | ☐ No - Cracks in wall plaster?  
☒ **Yes** | ☐ No - An exceptional fall of a chimney in poor condition?  
☒ **Yes** | ☐ No - An exceptional fall of some bricks?  
☒ **Yes** | ☐ No - Have there been several damaged chimneys?

How many?: **10%**

- ☒ **Yes** | ☐ No - Have there been several chimneys overturned?

How many?:

% for the municipality?: **3,5%**

- ☐ Yes | ☒ **No** - Have there been any falls of façade ornaments?

How important?:

- ☐ Yes | ☒ **No** - Have there been deep cracks in the brick walls?  
☒ **Yes** | ☐ No - Have there been deep cracks in the concrete walls?  
☐ Yes | ☒ **No** - Have there been landslides along the banks or slopes?

Importance:

ADDITIONAL COMMENTS:

## Official inquiry for CARNIERES (BE)

Location: 50.442°N 4.256°E, at 9.7 km from the epicentre.

**Imin: 3 - Imax: 3**

### Did some residents perceive

☒ **Yes** | ☐ **No** - Light vibrations?

☒ **Yes** | ☐ **No** - A characteristic noise: rumbling or rolling?

### Did many residents perceive

☐ **Yes** | ☒ **No** - A clear shaking of the building?

☐ **Yes** | ☒ **No** - A loud rumble?

### Have we witnessed

☐ **Yes** | ☒ **No** - The oscillation of chandeliers or freely suspended objects?

☒ **Yes** | ☐ **No** - Swinging chairs or beds?

☐ **Yes** | ☒ **No** - Cracking ceilings?

☐ **Yes** | ☒ **No** - Sleepers waking up?

### Has it been witnessed or later observed

☐ **Yes** | ☒ **No** - The shivering of windows and doors?

☐ **Yes** | ☒ **No** - The shaking of movable objects (tables, vases, knick-knacks, ...)?

### Has it been witnessed or later observed

☐ **Yes** | ☒ **No** - The clattering of glasses and dishes in buffets?

☐ **Yes** | ☒ **No** - The swaying of frames hanging on the wall?

☐ **Yes** | ☒ **No** - The creaking of floors?

☐ **Yes** | ☒ **No** - Small fragments of plaster falling from ceilings?

☐ **Yes** | ☒ **No** - A confusion of the inhabitants (people leaving the house).

### Has it been observed

☐ **Yes** | ☒ **No** - Moving knick-knacks?

☐ **Yes** | ☒ **No** - Moving light objects?

Which ones?:

☐ **Yes** | ☒ **No** - The falling of frames hanging on the wall?

☐ **Yes** | ☒ **No** - The falling of light objects placed on polished furniture or marble

☐ **Yes** | ☒ **No** - Cracked or broken windows?

☐ **Yes** | ☒ **No** - Broken crockery?

☐ **Yes** | ☒ **No** - Light objects (vases, flower pots, etc.) spilled?

☐ **Yes** | ☒ **No** - Has light furniture moved?

☐ **Yes** | ☒ **No** - Has heavy furniture (chests, stoves, ...) vibrated?

☐ **Yes** | ☒ **No** - Did bells tinkle?

☐ **Yes** | ☒ **No** - Did heavy furniture move?

☐ **Yes** | ☒ **No** - Did light furniture tip over?

☐ **Yes** | ☒ **No** - Have doors been moved on their hinges?

### Has it been observed

☐ **Yes** | ☒ **No** - Falling pieces of plaster from the ceilings?

☐ **Yes** | ☒ **No** - Cracks in wall plaster?

☐ **Yes** | ☒ **No** - An exceptional fall of a chimney in poor condition?

☐ **Yes** | ☒ **No** - An exceptional fall of some bricks?

☐ **Yes** | ☒ **No** - Have there been several damaged chimneys?

How many?:

☐ **Yes** | ☒ **No** - Have there been several chimneys overturned?

How many?:

% for the municipality?:

☐ **Yes** | ☒ **No** - Have there been any falls of façade ornaments?

How important?:

☐ **Yes** | ☒ **No** - Have there been deep cracks in the brick walls?

☐ **Yes** | ☒ **No** - Have there been deep cracks in the concrete walls?

☐ **Yes** | ☒ **No** - Have there been landslides along the banks or slopes?

Importance:

ADDITIONAL COMMENTS:

# Official inquiry for CHAUSSEE-NOTRE-DAME-LOUVIGNIES (BE)

Location: 50.513°N 4.016°E, at 10.2 km from the epicentre.

**Imin: 3 - Imax: 3**

## Did some residents perceive

- ☒ **Yes** | ☐ **No** - Light vibrations?  
☐ **Yes** | ☒ **No** - A characteristic noise: rumbling or rolling?

## Did many residents perceive

- ☐ **Yes** | ☒ **No** - A clear shaking of the building?  
☐ **Yes** | ☒ **No** - A loud rumble?

## Have we witnessed

- ☐ **Yes** | ☒ **No** - The oscillation of chandeliers or freely suspended objects?  
☐ **Yes** | ☒ **No** - Swinging chairs or beds?  
☐ **Yes** | ☒ **No** - Cracking ceilings?  
☐ **Yes** | ☒ **No** - Sleepers waking up?

## Has it been witnessed or later observed

- ☐ **Yes** | ☒ **No** - The shivering of windows and doors?  
☒ **Yes** | ☐ **No** - The shaking of movable objects (tables, vases, knick-knacks, ...)?

## Has it been witnessed or later observed

- ☐ **Yes** | ☒ **No** - The clattering of glasses and dishes in buffets?  
☐ **Yes** | ☒ **No** - The swaying of frames hanging on the wall?  
☐ **Yes** | ☒ **No** - The creaking of floors?  
☐ **Yes** | ☒ **No** - Small fragments of plaster falling from ceilings?  
☐ **Yes** | ☒ **No** - A confusion of the inhabitants (people leaving the house).

## Has it been observed

- ☐ **Yes** | ☒ **No** - Moving knick-knacks?  
☐ **Yes** | ☒ **No** - Moving light objects?  
 Which ones?:  
☐ **Yes** | ☒ **No** - The falling of frames hanging on the wall?  
☐ **Yes** | ☒ **No** - The falling of light objects placed on polished furniture or marble  
☐ **Yes** | ☒ **No** - Cracked or broken windows?  
☐ **Yes** | ☒ **No** - Broken crockery?  
☐ **Yes** | ☒ **No** - Light objects (vases, flower pots, etc.) spilled?  
☐ **Yes** | ☒ **No** - Has light furniture moved?  
☐ **Yes** | ☒ **No** - Has heavy furniture (chests, stoves, ...) vibrated?  
☐ **Yes** | ☒ **No** - Did bells tinkle?  
☐ **Yes** | ☒ **No** - Did heavy furniture move?  
☐ **Yes** | ☒ **No** - Did light furniture tip over?  
☐ **Yes** | ☒ **No** - Have doors been moved on their hinges?

## Has it been observed

- ☐ **Yes** | ☒ **No** - Falling pieces of plaster from the ceilings?  
☐ **Yes** | ☒ **No** - Cracks in wall plaster?  
☐ **Yes** | ☒ **No** - An exceptional fall of a chimney in poor condition?  
☐ **Yes** | ☒ **No** - An exceptional fall of some bricks?  
☐ **Yes** | ☒ **No** - Have there been several damaged chimneys?

How many?:

- ☐ **Yes** | ☒ **No** - Have there been several chimneys overturned?

How many?:

% for the municipality?:

- ☐ **Yes** | ☒ **No** - Have there been any falls of façade ornaments?

How important?:

- ☐ **Yes** | ☒ **No** - Have there been deep cracks in the brick walls?  
☐ **Yes** | ☒ **No** - Have there been deep cracks in the concrete walls?  
☐ **Yes** | ☒ **No** - Have there been landslides along the banks or slopes?

Importance:

ADDITIONAL COMMENTS:

## Official inquiry for CIPLY (BE)

Location: 50.42°N 3.945°E, at 12.9 km from the epicentre.

**Imin: 4 - Imax: 4**

### Did some residents perceive

- ☐ Yes | ☒ **No** - Light vibrations?  
☐ Yes | ☒ **No** - A characteristic noise: rumbling or rolling?

### Did many residents perceive

- ☒ **Yes** | ☐ No - A clear shaking of the building?  
☐ Yes | ☒ **No** - A loud rumble?

### Have we witnessed

- ☒ **Yes** | ☐ No - The oscillation of chandeliers or freely suspended objects?  
☐ Yes | ☒ **No** - Swinging chairs or beds?  
☐ Yes | ☒ **No** - Cracking ceilings?  
☐ Yes | ☒ **No** - Sleepers waking up?

### Has it been witnessed or later observed

- ☒ **Yes** | ☐ No - The shivering of windows and doors?  
☒ **Yes** | ☐ No - The shaking of movable objects (tables, vases, knick-knacks, ...)?

### Has it been witnessed or later observed

- ☐ Yes | ☒ **No** - The clattering of glasses and dishes in buffets?  
☐ Yes | ☒ **No** - The swaying of frames hanging on the wall?  
☐ Yes | ☒ **No** - The creaking of floors?  
☐ Yes | ☒ **No** - Small fragments of plaster falling from ceilings?  
☐ Yes | ☒ **No** - A confusion of the inhabitants (people leaving the house).

### Has it been observed

- ☐ Yes | ☒ **No** - Moving knick-knacks?  
☐ Yes | ☒ **No** - Moving light objects?  
 Which ones?:  
☐ Yes | ☒ **No** - The falling of frames hanging on the wall?  
☐ Yes | ☒ **No** - The falling of light objects placed on polished furniture or marble  
☐ Yes | ☒ **No** - Cracked or broken windows?  
☐ Yes | ☒ **No** - Broken crockery?  
☐ Yes | ☒ **No** - Light objects (vases, flower pots, etc.) spilled?  
☐ Yes | ☒ **No** - Has light furniture moved?  
☐ Yes | ☒ **No** - Has heavy furniture (chests, stoves, ...) vibrated?  
☐ Yes | ☒ **No** - Did bells tinkle?  
☐ Yes | ☒ **No** - Did heavy furniture move?  
☐ Yes | ☒ **No** - Did light furniture tip over?  
☐ Yes | ☒ **No** - Have doors been moved on their hinges?

### Has it been observed

- ☐ Yes | ☒ **No** - Falling pieces of plaster from the ceilings?  
☐ Yes | ☒ **No** - Cracks in wall plaster?  
☐ Yes | ☒ **No** - An exceptional fall of a chimney in poor condition?  
☐ Yes | ☒ **No** - An exceptional fall of some bricks?  
☐ Yes | ☒ **No** - Have there been several damaged chimneys?

How many?:

- ☐ Yes | ☒ **No** - Have there been several chimneys overturned?

How many?:

% for the municipality?:

- ☐ Yes | ☒ **No** - Have there been any falls of façade ornaments?

How important?:

- ☐ Yes | ☒ **No** - Have there been deep cracks in the brick walls?  
☐ Yes | ☒ **No** - Have there been deep cracks in the concrete walls?  
☐ Yes | ☒ **No** - Have there been landslides along the banks or slopes?

Importance:

ADDITIONAL COMMENTS:

## Official inquiry for CLABECQ (BE)

Location: 50.69°N 4.222°E, at 27.7 km from the epicentre.

**Imin: 3 - Imax: 3**

### Did some residents perceive

☒ **Yes** | ☐ **No** - Light vibrations?

☒ **Yes** | ☐ **No** - A characteristic noise: rumbling or rolling?

### Did many residents perceive

☐ **Yes** | ☒ **No** - A clear shaking of the building?

☐ **Yes** | ☒ **No** - A loud rumble?

### Have we witnessed

☐ **Yes** | ☒ **No** - The oscillation of chandeliers or freely suspended objects?

☐ **Yes** | ☒ **No** - Swinging chairs or beds?

☐ **Yes** | ☒ **No** - Cracking ceilings?

☐ **Yes** | ☒ **No** - Sleepers waking up?

### Has it been witnessed or later observed

☐ **Yes** | ☒ **No** - The shivering of windows and doors?

☐ **Yes** | ☒ **No** - The shaking of movable objects (tables, vases, knick-knacks, ...)?

### Has it been witnessed or later observed

☐ **Yes** | ☒ **No** - The clattering of glasses and dishes in buffets?

☐ **Yes** | ☒ **No** - The swaying of frames hanging on the wall?

☐ **Yes** | ☒ **No** - The creaking of floors?

☐ **Yes** | ☒ **No** - Small fragments of plaster falling from ceilings?

☐ **Yes** | ☒ **No** - A confusion of the inhabitants (people leaving the house).

### Has it been observed

☐ **Yes** | ☒ **No** - Moving knick-knacks?

☐ **Yes** | ☒ **No** - Moving light objects?

Which ones?:

☐ **Yes** | ☒ **No** - The falling of frames hanging on the wall?

☐ **Yes** | ☒ **No** - The falling of light objects placed on polished furniture or marble

☐ **Yes** | ☒ **No** - Cracked or broken windows?

☐ **Yes** | ☒ **No** - Broken crockery?

☐ **Yes** | ☒ **No** - Light objects (vases, flower pots, etc.) spilled?

☐ **Yes** | ☒ **No** - Has light furniture moved?

☐ **Yes** | ☒ **No** - Has heavy furniture (chests, stoves, ...) vibrated?

☐ **Yes** | ☒ **No** - Did bells tinkle?

☐ **Yes** | ☒ **No** - Did heavy furniture move?

☐ **Yes** | ☒ **No** - Did light furniture tip over?

☐ **Yes** | ☒ **No** - Have doors been moved on their hinges?

### Has it been observed

☐ **Yes** | ☒ **No** - Falling pieces of plaster from the ceilings?

☐ **Yes** | ☒ **No** - Cracks in wall plaster?

☐ **Yes** | ☒ **No** - An exceptional fall of a chimney in poor condition?

☐ **Yes** | ☒ **No** - An exceptional fall of some bricks?

☐ **Yes** | ☒ **No** - Have there been several damaged chimneys?

How many?:

☐ **Yes** | ☒ **No** - Have there been several chimneys overturned?

How many?:

% for the municipality?:

☐ **Yes** | ☒ **No** - Have there been any falls of façade ornaments?

How important?:

☐ **Yes** | ☒ **No** - Have there been deep cracks in the brick walls?

☐ **Yes** | ☒ **No** - Have there been deep cracks in the concrete walls?

☐ **Yes** | ☒ **No** - Have there been landslides along the banks or slopes?

Importance:

ADDITIONAL COMMENTS:

## Official inquiry for CROIX-LEZ-ROUVEROY (BE)

Location: 50.361°N 4.076°E, at 10.4 km from the epicentre.

**Imin: 3 - Imax: 3**

### Did some residents perceive

- ☒ **Yes** | ☐ No - Light vibrations?  
☒ **Yes** | ☐ No - A characteristic noise: rumbling or rolling?

### Did many residents perceive

- ☐ Yes | ☒ **No** - A clear shaking of the building?  
☐ Yes | ☒ **No** - A loud rumble?

### Have we witnessed

- ☐ Yes | ☒ **No** - The oscillation of chandeliers or freely suspended objects?  
☐ Yes | ☒ **No** - Swinging chairs or beds?  
☐ Yes | ☒ **No** - Cracking ceilings?  
☐ Yes | ☒ **No** - Sleepers waking up?

### Has it been witnessed or later observed

- ☒ **Yes** | ☐ No - The shivering of windows and doors?  
☐ Yes | ☒ **No** - The shaking of movable objects (tables, vases, knick-knacks, ...)?

### Has it been witnessed or later observed

- ☐ Yes | ☒ **No** - The clattering of glasses and dishes in buffets?  
☐ Yes | ☒ **No** - The swaying of frames hanging on the wall?  
☐ Yes | ☒ **No** - The creaking of floors?  
☐ Yes | ☒ **No** - Small fragments of plaster falling from ceilings?  
☐ Yes | ☒ **No** - A confusion of the inhabitants (people leaving the house).

### Has it been observed

- ☐ Yes | ☒ **No** - Moving knick-knacks?  
☐ Yes | ☒ **No** - Moving light objects?  
 Which ones?:  
☐ Yes | ☒ **No** - The falling of frames hanging on the wall?  
☐ Yes | ☒ **No** - The falling of light objects placed on polished furniture or marble  
☐ Yes | ☒ **No** - Cracked or broken windows?  
☐ Yes | ☒ **No** - Broken crockery?  
☐ Yes | ☒ **No** - Light objects (vases, flower pots, etc.) spilled?  
☐ Yes | ☒ **No** - Has light furniture moved?  
☐ Yes | ☒ **No** - Has heavy furniture (chests, stoves, ...) vibrated?  
☐ Yes | ☒ **No** - Did bells tinkle?  
☐ Yes | ☒ **No** - Did heavy furniture move?  
☐ Yes | ☒ **No** - Did light furniture tip over?  
☐ Yes | ☒ **No** - Have doors been moved on their hinges?

### Has it been observed

- ☐ Yes | ☒ **No** - Falling pieces of plaster from the ceilings?  
☐ Yes | ☒ **No** - Cracks in wall plaster?  
☐ Yes | ☒ **No** - An exceptional fall of a chimney in poor condition?  
☐ Yes | ☒ **No** - An exceptional fall of some bricks?  
☐ Yes | ☒ **No** - Have there been several damaged chimneys?

How many?:

- ☐ Yes | ☒ **No** - Have there been several chimneys overturned?

How many?:

% for the municipality?:

- ☐ Yes | ☒ **No** - Have there been any falls of façade ornaments?

How important?:

- ☐ Yes | ☒ **No** - Have there been deep cracks in the brick walls?  
☐ Yes | ☒ **No** - Have there been deep cracks in the concrete walls?  
☐ Yes | ☒ **No** - Have there been landslides along the banks or slopes?

Importance:

ADDITIONAL COMMENTS:

## Official inquiry for CUESMES (BE)

Location: 50.438°N 3.92°E, at 14.3 km from the epicentre.

**Imin: 3 - Imax: 3**

### Did some residents perceive

- ☒ **Yes** | ☐ **No** - Light vibrations?  
☐ **Yes** | ☒ **No** - A characteristic noise: rumbling or rolling?

### Did many residents perceive

- ☐ **Yes** | ☒ **No** - A clear shaking of the building?  
☐ **Yes** | ☒ **No** - A loud rumble?

### Have we witnessed

- ☐ **Yes** | ☒ **No** - The oscillation of chandeliers or freely suspended objects?  
☐ **Yes** | ☒ **No** - Swinging chairs or beds?  
☐ **Yes** | ☒ **No** - Cracking ceilings?  
☐ **Yes** | ☒ **No** - Sleepers waking up?

### Has it been witnessed or later observed

- ☐ **Yes** | ☒ **No** - The shivering of windows and doors?  
☒ **Yes** | ☐ **No** - The shaking of movable objects (tables, vases, knick-knacks, ...)?

### Has it been witnessed or later observed

- ☐ **Yes** | ☒ **No** - The clattering of glasses and dishes in buffets?  
☐ **Yes** | ☒ **No** - The swaying of frames hanging on the wall?  
☐ **Yes** | ☒ **No** - The creaking of floors?  
☐ **Yes** | ☒ **No** - Small fragments of plaster falling from ceilings?  
☐ **Yes** | ☒ **No** - A confusion of the inhabitants (people leaving the house).

### Has it been observed

- ☐ **Yes** | ☒ **No** - Moving knick-knacks?  
☐ **Yes** | ☒ **No** - Moving light objects?  
 Which ones?:  
☐ **Yes** | ☒ **No** - The falling of frames hanging on the wall?  
☐ **Yes** | ☒ **No** - The falling of light objects placed on polished furniture or marble  
☐ **Yes** | ☒ **No** - Cracked or broken windows?  
☐ **Yes** | ☒ **No** - Broken crockery?  
☐ **Yes** | ☒ **No** - Light objects (vases, flower pots, etc.) spilled?  
☐ **Yes** | ☒ **No** - Has light furniture moved?  
☐ **Yes** | ☒ **No** - Has heavy furniture (chests, stoves, ...) vibrated?  
☐ **Yes** | ☒ **No** - Did bells tinkle?  
☐ **Yes** | ☒ **No** - Did heavy furniture move?  
☐ **Yes** | ☒ **No** - Did light furniture tip over?  
☐ **Yes** | ☒ **No** - Have doors been moved on their hinges?

### Has it been observed

- ☐ **Yes** | ☒ **No** - Falling pieces of plaster from the ceilings?  
☐ **Yes** | ☒ **No** - Cracks in wall plaster?  
☐ **Yes** | ☒ **No** - An exceptional fall of a chimney in poor condition?  
☐ **Yes** | ☒ **No** - An exceptional fall of some bricks?  
☐ **Yes** | ☒ **No** - Have there been several damaged chimneys?

How many?:

- ☐ **Yes** | ☒ **No** - Have there been several chimneys overturned?

How many?:

% for the municipality?:

- ☐ **Yes** | ☒ **No** - Have there been any falls of façade ornaments?

How important?:

- ☐ **Yes** | ☒ **No** - Have there been deep cracks in the brick walls?  
☐ **Yes** | ☒ **No** - Have there been deep cracks in the concrete walls?  
☐ **Yes** | ☒ **No** - Have there been landslides along the banks or slopes?

Importance:

ADDITIONAL COMMENTS:

## Official inquiry for EPINOIS (BE)

Location: 50.403°N 4.206°E, at 8.0 km from the epicentre.

**Imin: 4 - Imax: 4**

### Did some residents perceive

- ☐ Yes | ☒ **No** - Light vibrations?  
☐ Yes | ☒ **No** - A characteristic noise: rumbling or rolling?

### Did many residents perceive

- ☒ **Yes** | ☐ No - A clear shaking of the building?  
☒ **Yes** | ☐ No - A loud rumble?

### Have we witnessed

- ☒ **Yes** | ☐ No - The oscillation of chandeliers or freely suspended objects?  
☒ **Yes** | ☐ No - Swinging chairs or beds?  
☐ Yes | ☒ **No** - Cracking ceilings?  
☒ **Yes** | ☐ No - Sleepers waking up?

### Has it been witnessed or later observed

- ☒ **Yes** | ☐ No - The shivering of windows and doors?  
☐ Yes | ☒ **No** - The shaking of movable objects (tables, vases, knick-knacks, ...)?

### Has it been witnessed or later observed

- ☐ Yes | ☒ **No** - The clattering of glasses and dishes in buffets?  
☐ Yes | ☒ **No** - The swaying of frames hanging on the wall?  
☐ Yes | ☒ **No** - The creaking of floors?  
☐ Yes | ☒ **No** - Small fragments of plaster falling from ceilings?  
☒ **Yes** | ☐ No - A confusion of the inhabitants (people leaving the house).

### Has it been observed

- ☐ Yes | ☒ **No** - Moving knick-knacks?  
☐ Yes | ☒ **No** - Moving light objects?  
 Which ones?:  
☐ Yes | ☒ **No** - The falling of frames hanging on the wall?  
☐ Yes | ☒ **No** - The falling of light objects placed on polished furniture or marble  
☐ Yes | ☒ **No** - Cracked or broken windows?  
☐ Yes | ☒ **No** - Broken crockery?  
☐ Yes | ☒ **No** - Light objects (vases, flower pots, etc.) spilled?  
☐ Yes | ☒ **No** - Has light furniture moved?  
☐ Yes | ☒ **No** - Has heavy furniture (chests, stoves, ...) vibrated?  
☐ Yes | ☒ **No** - Did bells tinkle?  
☐ Yes | ☒ **No** - Did heavy furniture move?  
☐ Yes | ☒ **No** - Did light furniture tip over?  
☐ Yes | ☒ **No** - Have doors been moved on their hinges?

### Has it been observed

- ☐ Yes | ☒ **No** - Falling pieces of plaster from the ceilings?  
☐ Yes | ☒ **No** - Cracks in wall plaster?  
☐ Yes | ☒ **No** - An exceptional fall of a chimney in poor condition?  
☒ **Yes** | ☐ No - An exceptional fall of some bricks?  
☐ Yes | ☒ **No** - Have there been several damaged chimneys?

How many?:

- ☐ Yes | ☒ **No** - Have there been several chimneys overturned?

How many?:

% for the municipality?:

- ☐ Yes | ☒ **No** - Have there been any falls of façade ornaments?

How important?:

- ☐ Yes | ☒ **No** - Have there been deep cracks in the brick walls?  
☐ Yes | ☒ **No** - Have there been deep cracks in the concrete walls?  
☐ Yes | ☒ **No** - Have there been landslides along the banks or slopes?

Importance:

ADDITIONAL COMMENTS:

## Official inquiry for ESTINNES-AU-MONT (BE)

Location: 50.397°N 4.098°E, at 6.1 km from the epicentre.

**Imin: 5 - Imax: 5**

### Did some residents perceive

- ☐ Yes | ☒ **No** - Light vibrations?  
☒ **Yes** | ☐ No - A characteristic noise: rumbling or rolling?

### Did many residents perceive

- ☒ **Yes** | ☐ No - A clear shaking of the building?  
☐ Yes | ☒ **No** - A loud rumble?

### Have we witnessed

- ☐ Yes | ☒ **No** - The oscillation of chandeliers or freely suspended objects?  
☐ Yes | ☒ **No** - Swinging chairs or beds?  
☐ Yes | ☒ **No** - Cracking ceilings?  
☐ Yes | ☒ **No** - Sleepers waking up?

### Has it been witnessed or later observed

- ☒ **Yes** | ☐ No - The shivering of windows and doors?  
☐ Yes | ☒ **No** - The shaking of movable objects (tables, vases, knick-knacks, ...)?

### Has it been witnessed or later observed

- ☐ Yes | ☒ **No** - The clattering of glasses and dishes in buffets?  
☐ Yes | ☒ **No** - The swaying of frames hanging on the wall?  
☐ Yes | ☒ **No** - The creaking of floors?  
☐ Yes | ☒ **No** - Small fragments of plaster falling from ceilings?  
☒ **Yes** | ☐ No - A confusion of the inhabitants (people leaving the house).

### Has it been observed

- ☐ Yes | ☒ **No** - Moving knick-knacks?  
☐ Yes | ☒ **No** - Moving light objects?  
 Which ones?:  
☐ Yes | ☒ **No** - The falling of frames hanging on the wall?  
☐ Yes | ☒ **No** - The falling of light objects placed on polished furniture or marble  
☐ Yes | ☒ **No** - Cracked or broken windows?  
☐ Yes | ☒ **No** - Broken crockery?  
☐ Yes | ☒ **No** - Light objects (vases, flower pots, etc.) spilled?  
☐ Yes | ☒ **No** - Has light furniture moved?  
☐ Yes | ☒ **No** - Has heavy furniture (chests, stoves, ...) vibrated?  
☐ Yes | ☒ **No** - Did bells tinkle?  
☐ Yes | ☒ **No** - Did heavy furniture move?  
☐ Yes | ☒ **No** - Did light furniture tip over?  
☐ Yes | ☒ **No** - Have doors been moved on their hinges?

### Has it been observed

- ☐ Yes | ☒ **No** - Falling pieces of plaster from the ceilings?  
☐ Yes | ☒ **No** - Cracks in wall plaster?  
☒ **Yes** | ☐ No - An exceptional fall of a chimney in poor condition?  
☒ **Yes** | ☐ No - An exceptional fall of some bricks?  
☒ **Yes** | ☐ No - Have there been several damaged chimneys?

How many?: **deux**

- ☐ Yes | ☒ **No** - Have there been several chimneys overturned?

How many?:

% for the municipality?:

- ☐ Yes | ☒ **No** - Have there been any falls of façade ornaments?

How important?:

- ☐ Yes | ☒ **No** - Have there been deep cracks in the brick walls?  
☐ Yes | ☒ **No** - Have there been deep cracks in the concrete walls?  
☐ Yes | ☒ **No** - Have there been landslides along the banks or slopes?

Importance:

ADDITIONAL COMMENTS:

## Official inquiry for ESTINNES-AU-VAL (BE)

Location: 50.412°N 4.106°E, at 4.4 km from the epicentre.

**Imin: 4 - Imax: 4**

### Did some residents perceive

- ☐ Yes | ☒ **No** - Light vibrations?  
☐ Yes | ☒ **No** - A characteristic noise: rumbling or rolling?

### Did many residents perceive

- ☐ Yes | ☒ **No** - A clear shaking of the building?  
☒ **Yes** | ☐ No - A loud rumble?

### Have we witnessed

- ☒ **Yes** | ☐ No - The oscillation of chandeliers or freely suspended objects?  
☐ Yes | ☒ **No** - Swinging chairs or beds?  
☐ Yes | ☒ **No** - Cracking ceilings?  
☒ **Yes** | ☐ No - Sleepers waking up?

### Has it been witnessed or later observed

- ☒ **Yes** | ☐ No - The shivering of windows and doors?  
☒ **Yes** | ☐ No - The shaking of movable objects (tables, vases, knick-knacks, ...)?

### Has it been witnessed or later observed

- ☐ Yes | ☒ **No** - The clattering of glasses and dishes in buffets?  
☒ **Yes** | ☐ No - The swaying of frames hanging on the wall?  
☐ Yes | ☒ **No** - The creaking of floors?  
☐ Yes | ☒ **No** - Small fragments of plaster falling from ceilings?  
☐ Yes | ☒ **No** - A confusion of the inhabitants (people leaving the house).

### Has it been observed

- ☐ Yes | ☒ **No** - Moving knick-knacks?  
☐ Yes | ☒ **No** - Moving light objects?  
 Which ones?:  
☐ Yes | ☒ **No** - The falling of frames hanging on the wall?  
☐ Yes | ☒ **No** - The falling of light objects placed on polished furniture or marble  
☒ **Yes** | ☐ No - Cracked or broken windows?  
☐ Yes | ☒ **No** - Broken crockery?  
☐ Yes | ☒ **No** - Light objects (vases, flower pots, etc.) spilled?  
☐ Yes | ☒ **No** - Has light furniture moved?  
☐ Yes | ☒ **No** - Has heavy furniture (chests, stoves, ...) vibrated?  
☐ Yes | ☒ **No** - Did bells tinkle?  
☐ Yes | ☒ **No** - Did heavy furniture move?  
☐ Yes | ☒ **No** - Did light furniture tip over?  
☐ Yes | ☒ **No** - Have doors been moved on their hinges?

### Has it been observed

- ☐ Yes | ☒ **No** - Falling pieces of plaster from the ceilings?  
☐ Yes | ☒ **No** - Cracks in wall plaster?  
☐ Yes | ☒ **No** - An exceptional fall of a chimney in poor condition?  
☐ Yes | ☒ **No** - An exceptional fall of some bricks?  
☐ Yes | ☒ **No** - Have there been several damaged chimneys?

How many?:

- ☐ Yes | ☒ **No** - Have there been several chimneys overturned?

How many?:

% for the municipality?:

- ☐ Yes | ☒ **No** - Have there been any falls of façade ornaments?

How important?:

- ☐ Yes | ☒ **No** - Have there been deep cracks in the brick walls?  
☐ Yes | ☒ **No** - Have there been deep cracks in the concrete walls?  
☒ **Yes** | ☐ No - Have there been landslides along the banks or slopes?

Importance:

ADDITIONAL COMMENTS:

## Official inquiry for FAMILLEUREUX (BE)

Location: 50.522°N 4.212°E, at 10.3 km from the epicentre.

**Imin: 4 - Imax: 4**

### Did some residents perceive

- ☒ **Yes** | ☐ No - Light vibrations?  
☐ Yes | ☒ **No** - A characteristic noise: rumbling or rolling?

### Did many residents perceive

- ☒ **Yes** | ☐ No - A clear shaking of the building?  
☐ Yes | ☒ **No** - A loud rumble?

### Have we witnessed

- ☒ **Yes** | ☐ No - The oscillation of chandeliers or freely suspended objects?  
☒ **Yes** | ☐ No - Swinging chairs or beds?  
☐ Yes | ☒ **No** - Cracking ceilings?  
☐ Yes | ☒ **No** - Sleepers waking up?

### Has it been witnessed or later observed

- ☒ **Yes** | ☐ No - The shivering of windows and doors?  
☒ **Yes** | ☐ No - The shaking of movable objects (tables, vases, knick-knacks, ...)?

### Has it been witnessed or later observed

- ☒ **Yes** | ☐ No - The clattering of glasses and dishes in buffets?  
☒ **Yes** | ☐ No - The swaying of frames hanging on the wall?  
☐ Yes | ☒ **No** - The creaking of floors?  
☐ Yes | ☒ **No** - Small fragments of plaster falling from ceilings?  
☒ **Yes** | ☐ No - A confusion of the inhabitants (people leaving the house).

### Has it been observed

- ☐ Yes | ☒ **No** - Moving knick-knacks?  
☐ Yes | ☒ **No** - Moving light objects?  
 Which ones?:  
☐ Yes | ☒ **No** - The falling of frames hanging on the wall?  
☐ Yes | ☒ **No** - The falling of light objects placed on polished furniture or marble  
☐ Yes | ☒ **No** - Cracked or broken windows?  
☐ Yes | ☒ **No** - Broken crockery?  
☐ Yes | ☒ **No** - Light objects (vases, flower pots, etc.) spilled?  
☐ Yes | ☒ **No** - Has light furniture moved?  
☐ Yes | ☒ **No** - Has heavy furniture (chests, stoves, ...) vibrated?  
☐ Yes | ☒ **No** - Did bells tinkle?  
☐ Yes | ☒ **No** - Did heavy furniture move?  
☐ Yes | ☒ **No** - Did light furniture tip over?  
☐ Yes | ☒ **No** - Have doors been moved on their hinges?

### Has it been observed

- ☐ Yes | ☒ **No** - Falling pieces of plaster from the ceilings?  
☐ Yes | ☒ **No** - Cracks in wall plaster?  
☐ Yes | ☒ **No** - An exceptional fall of a chimney in poor condition?  
☐ Yes | ☒ **No** - An exceptional fall of some bricks?  
☐ Yes | ☒ **No** - Have there been several damaged chimneys?

How many?:

- ☐ Yes | ☒ **No** - Have there been several chimneys overturned?

How many?:

% for the municipality?:

- ☐ Yes | ☒ **No** - Have there been any falls of façade ornaments?

How important?:

- ☐ Yes | ☒ **No** - Have there been deep cracks in the brick walls?  
☐ Yes | ☒ **No** - Have there been deep cracks in the concrete walls?  
☐ Yes | ☒ **No** - Have there been landslides along the banks or slopes?

Importance:

ADDITIONAL COMMENTS:

## Official inquiry for FAUROEULX (BE)

Location: 50.37°N 4.111°E, at 8.9 km from the epicentre.

**Imin: 2 - Imax: 2**

### Did some residents perceive

- ☒ **Yes** | ☐ **No** - Light vibrations?  
☐ **Yes** | ☒ **No** - A characteristic noise: rumbling or rolling?

### Did many residents perceive

- ☐ **Yes** | ☒ **No** - A clear shaking of the building?  
☐ **Yes** | ☒ **No** - A loud rumble?

### Have we witnessed

- ☐ **Yes** | ☒ **No** - The oscillation of chandeliers or freely suspended objects?  
☐ **Yes** | ☒ **No** - Swinging chairs or beds?  
☐ **Yes** | ☒ **No** - Cracking ceilings?  
☐ **Yes** | ☒ **No** - Sleepers waking up?

### Has it been witnessed or later observed

- ☐ **Yes** | ☒ **No** - The shivering of windows and doors?  
☐ **Yes** | ☒ **No** - The shaking of movable objects (tables, vases, knick-knacks, ...)?

### Has it been witnessed or later observed

- ☐ **Yes** | ☒ **No** - The clattering of glasses and dishes in buffets?  
☐ **Yes** | ☒ **No** - The swaying of frames hanging on the wall?  
☐ **Yes** | ☒ **No** - The creaking of floors?  
☐ **Yes** | ☒ **No** - Small fragments of plaster falling from ceilings?  
☐ **Yes** | ☒ **No** - A confusion of the inhabitants (people leaving the house).

### Has it been observed

- ☐ **Yes** | ☒ **No** - Moving knick-knacks?  
☐ **Yes** | ☒ **No** - Moving light objects?  
 Which ones?:  
☐ **Yes** | ☒ **No** - The falling of frames hanging on the wall?  
☐ **Yes** | ☒ **No** - The falling of light objects placed on polished furniture or marble  
☐ **Yes** | ☒ **No** - Cracked or broken windows?  
☐ **Yes** | ☒ **No** - Broken crockery?  
☐ **Yes** | ☒ **No** - Light objects (vases, flower pots, etc.) spilled?  
☐ **Yes** | ☒ **No** - Has light furniture moved?  
☐ **Yes** | ☒ **No** - Has heavy furniture (chests, stoves, ...) vibrated?  
☐ **Yes** | ☒ **No** - Did bells tinkle?  
☐ **Yes** | ☒ **No** - Did heavy furniture move?  
☐ **Yes** | ☒ **No** - Did light furniture tip over?  
☐ **Yes** | ☒ **No** - Have doors been moved on their hinges?

### Has it been observed

- ☐ **Yes** | ☒ **No** - Falling pieces of plaster from the ceilings?  
☐ **Yes** | ☒ **No** - Cracks in wall plaster?  
☐ **Yes** | ☒ **No** - An exceptional fall of a chimney in poor condition?  
☐ **Yes** | ☒ **No** - An exceptional fall of some bricks?  
☐ **Yes** | ☒ **No** - Have there been several damaged chimneys?

How many?:

- ☐ **Yes** | ☒ **No** - Have there been several chimneys overturned?

How many?:

% for the municipality?:

- ☐ **Yes** | ☒ **No** - Have there been any falls of façade ornaments?

How important?:

- ☐ **Yes** | ☒ **No** - Have there been deep cracks in the brick walls?  
☐ **Yes** | ☒ **No** - Have there been deep cracks in the concrete walls?  
☐ **Yes** | ☒ **No** - Have there been landslides along the banks or slopes?

Importance:

ADDITIONAL COMMENTS:

## Official inquiry for FAYT-LEZ-MANAGE (BE)

Location: 50.491°N 4.228°E, at 8.9 km from the epicentre.

**Imin: 4 - Imax: 4**

### Did some residents perceive

- ☒ **Yes** | ☐ No - Light vibrations?  
☒ **Yes** | ☐ No - A characteristic noise: rumbling or rolling?

### Did many residents perceive

- ☐ Yes | ☒ **No** - A clear shaking of the building?  
☒ **Yes** | ☐ No - A loud rumble?

### Have we witnessed

- ☒ **Yes** | ☐ No - The oscillation of chandeliers or freely suspended objects?  
☐ Yes | ☒ **No** - Swinging chairs or beds?  
☐ Yes | ☒ **No** - Cracking ceilings?  
☐ Yes | ☒ **No** - Sleepers waking up?

### Has it been witnessed or later observed

- ☒ **Yes** | ☐ No - The shivering of windows and doors?  
☒ **Yes** | ☐ No - The shaking of movable objects (tables, vases, knick-knacks, ...)?

### Has it been witnessed or later observed

- ☒ **Yes** | ☐ No - The clattering of glasses and dishes in buffets?  
☒ **Yes** | ☐ No - The swaying of frames hanging on the wall?  
☐ Yes | ☒ **No** - The creaking of floors?  
☐ Yes | ☒ **No** - Small fragments of plaster falling from ceilings?  
☒ **Yes** | ☐ No - A confusion of the inhabitants (people leaving the house).

### Has it been observed

- ☐ Yes | ☒ **No** - Moving knick-knacks?  
☐ Yes | ☒ **No** - Moving light objects?  
 Which ones?:  
☐ Yes | ☒ **No** - The falling of frames hanging on the wall?  
☐ Yes | ☒ **No** - The falling of light objects placed on polished furniture or marble  
☐ Yes | ☒ **No** - Cracked or broken windows?  
☐ Yes | ☒ **No** - Broken crockery?  
☐ Yes | ☒ **No** - Light objects (vases, flower pots, etc.) spilled?  
☐ Yes | ☒ **No** - Has light furniture moved?  
☐ Yes | ☒ **No** - Has heavy furniture (chests, stoves, ...) vibrated?  
☐ Yes | ☒ **No** - Did bells tinkle?  
☐ Yes | ☒ **No** - Did heavy furniture move?  
☐ Yes | ☒ **No** - Did light furniture tip over?  
☐ Yes | ☒ **No** - Have doors been moved on their hinges?

### Has it been observed

- ☐ Yes | ☒ **No** - Falling pieces of plaster from the ceilings?  
☐ Yes | ☒ **No** - Cracks in wall plaster?  
☐ Yes | ☒ **No** - An exceptional fall of a chimney in poor condition?  
☐ Yes | ☒ **No** - An exceptional fall of some bricks?  
☐ Yes | ☒ **No** - Have there been several damaged chimneys?

How many?:

- ☐ Yes | ☒ **No** - Have there been several chimneys overturned?

How many?:

% for the municipality?:

- ☐ Yes | ☒ **No** - Have there been any falls of façade ornaments?

How important?:

- ☐ Yes | ☒ **No** - Have there been deep cracks in the brick walls?  
☐ Yes | ☒ **No** - Have there been deep cracks in the concrete walls?  
☐ Yes | ☒ **No** - Have there been landslides along the banks or slopes?

Importance:

ADDITIONAL COMMENTS:

## Official inquiry for FELUY (BE)

Location: 50.563°N 4.252°E, at 15.6 km from the epicentre.

**Imin: 3 - Imax: 4**

### Did some residents perceive

- ☐ Yes | ☒ **No** - Light vibrations?  
☒ **Yes** | ☐ No - A characteristic noise: rumbling or rolling?

### Did many residents perceive

- ☐ Yes | ☒ **No** - A clear shaking of the building?  
☐ Yes | ☒ **No** - A loud rumble?

### Have we witnessed

- ☐ Yes | ☒ **No** - The oscillation of chandeliers or freely suspended objects?  
☐ Yes | ☒ **No** - Swinging chairs or beds?  
☐ Yes | ☒ **No** - Cracking ceilings?  
☐ Yes | ☒ **No** - Sleepers waking up?

### Has it been witnessed or later observed

- ☐ Yes | ☒ **No** - The shivering of windows and doors?  
☒ **Yes** | ☐ No - The shaking of movable objects (tables, vases, knick-knacks, ...)?

### Has it been witnessed or later observed

- ☒ **Yes** | ☐ No - The clattering of glasses and dishes in buffets?  
☐ Yes | ☒ **No** - The swaying of frames hanging on the wall?  
☐ Yes | ☒ **No** - The creaking of floors?  
☐ Yes | ☒ **No** - Small fragments of plaster falling from ceilings?  
☐ Yes | ☒ **No** - A confusion of the inhabitants (people leaving the house).

### Has it been observed

- ☐ Yes | ☒ **No** - Moving knick-knacks?  
☐ Yes | ☒ **No** - Moving light objects?  
 Which ones?:  
☐ Yes | ☒ **No** - The falling of frames hanging on the wall?  
☐ Yes | ☒ **No** - The falling of light objects placed on polished furniture or marble  
☐ Yes | ☒ **No** - Cracked or broken windows?  
☐ Yes | ☒ **No** - Broken crockery?  
☐ Yes | ☒ **No** - Light objects (vases, flower pots, etc.) spilled?  
☐ Yes | ☒ **No** - Has light furniture moved?  
☐ Yes | ☒ **No** - Has heavy furniture (chests, stoves, ...) vibrated?  
☐ Yes | ☒ **No** - Did bells tinkle?  
☐ Yes | ☒ **No** - Did heavy furniture move?  
☐ Yes | ☒ **No** - Did light furniture tip over?  
☐ Yes | ☒ **No** - Have doors been moved on their hinges?

### Has it been observed

- ☐ Yes | ☒ **No** - Falling pieces of plaster from the ceilings?  
☐ Yes | ☒ **No** - Cracks in wall plaster?  
☐ Yes | ☒ **No** - An exceptional fall of a chimney in poor condition?  
☐ Yes | ☒ **No** - An exceptional fall of some bricks?  
☐ Yes | ☒ **No** - Have there been several damaged chimneys?

How many?:

- ☐ Yes | ☒ **No** - Have there been several chimneys overturned?

How many?:

% for the municipality?:

- ☐ Yes | ☒ **No** - Have there been any falls of façade ornaments?

How important?:

- ☐ Yes | ☒ **No** - Have there been deep cracks in the brick walls?  
☐ Yes | ☒ **No** - Have there been deep cracks in the concrete walls?  
☐ Yes | ☒ **No** - Have there been landslides along the banks or slopes?

Importance:

ADDITIONAL COMMENTS:

## Official inquiry for FLENU (BE)

Location: 50.449°N 3.888°E, at 16.5 km from the epicentre.

**Imin: 2 - Imax: 2**

### Did some residents perceive

- ☒ **Yes** | ☐ **No** - Light vibrations?  
☐ **Yes** | ☒ **No** - A characteristic noise: rumbling or rolling?

### Did many residents perceive

- ☐ **Yes** | ☒ **No** - A clear shaking of the building?  
☐ **Yes** | ☒ **No** - A loud rumble?

### Have we witnessed

- ☐ **Yes** | ☒ **No** - The oscillation of chandeliers or freely suspended objects?  
☐ **Yes** | ☒ **No** - Swinging chairs or beds?  
☐ **Yes** | ☒ **No** - Cracking ceilings?  
☐ **Yes** | ☒ **No** - Sleepers waking up?

### Has it been witnessed or later observed

- ☐ **Yes** | ☒ **No** - The shivering of windows and doors?  
☐ **Yes** | ☒ **No** - The shaking of movable objects (tables, vases, knick-knacks, ...)?

### Has it been witnessed or later observed

- ☐ **Yes** | ☒ **No** - The clattering of glasses and dishes in buffets?  
☐ **Yes** | ☒ **No** - The swaying of frames hanging on the wall?  
☐ **Yes** | ☒ **No** - The creaking of floors?  
☐ **Yes** | ☒ **No** - Small fragments of plaster falling from ceilings?  
☐ **Yes** | ☒ **No** - A confusion of the inhabitants (people leaving the house).

### Has it been observed

- ☐ **Yes** | ☒ **No** - Moving knick-knacks?  
☐ **Yes** | ☒ **No** - Moving light objects?  
 Which ones?:  
☐ **Yes** | ☒ **No** - The falling of frames hanging on the wall?  
☐ **Yes** | ☒ **No** - The falling of light objects placed on polished furniture or marble  
☐ **Yes** | ☒ **No** - Cracked or broken windows?  
☐ **Yes** | ☒ **No** - Broken crockery?  
☐ **Yes** | ☒ **No** - Light objects (vases, flower pots, etc.) spilled?  
☐ **Yes** | ☒ **No** - Has light furniture moved?  
☐ **Yes** | ☒ **No** - Has heavy furniture (chests, stoves, ...) vibrated?  
☐ **Yes** | ☒ **No** - Did bells tinkle?  
☐ **Yes** | ☒ **No** - Did heavy furniture move?  
☐ **Yes** | ☒ **No** - Did light furniture tip over?  
☐ **Yes** | ☒ **No** - Have doors been moved on their hinges?

### Has it been observed

- ☐ **Yes** | ☒ **No** - Falling pieces of plaster from the ceilings?  
☐ **Yes** | ☒ **No** - Cracks in wall plaster?  
☐ **Yes** | ☒ **No** - An exceptional fall of a chimney in poor condition?  
☐ **Yes** | ☒ **No** - An exceptional fall of some bricks?  
☐ **Yes** | ☒ **No** - Have there been several damaged chimneys?

How many?:

- ☐ **Yes** | ☒ **No** - Have there been several chimneys overturned?

How many?:

% for the municipality?:

- ☐ **Yes** | ☒ **No** - Have there been any falls of façade ornaments?

How important?:

- ☐ **Yes** | ☒ **No** - Have there been deep cracks in the brick walls?  
☐ **Yes** | ☒ **No** - Have there been deep cracks in the concrete walls?  
☐ **Yes** | ☒ **No** - Have there been landslides along the banks or slopes?

Importance:

ADDITIONAL COMMENTS:

## Official inquiry for FORGE-PHILIPPE (BE)

Location: 49.966°N 4.256°E, at 54.8 km from the epicentre.

**Imin: 2 - Imax: 2**

### Did some residents perceive

- ☒ **Yes** | ☐ No - Light vibrations?  
☒ **Yes** | ☐ No - A characteristic noise: rumbling or rolling?

### Did many residents perceive

- ☐ Yes | ☒ **No** - A clear shaking of the building?  
☐ Yes | ☒ **No** - A loud rumble?

### Have we witnessed

- ☐ Yes | ☒ **No** - The oscillation of chandeliers or freely suspended objects?  
☐ Yes | ☒ **No** - Swinging chairs or beds?  
☐ Yes | ☒ **No** - Cracking ceilings?  
☐ Yes | ☒ **No** - Sleepers waking up?

### Has it been witnessed or later observed

- ☐ Yes | ☒ **No** - The shivering of windows and doors?  
☐ Yes | ☒ **No** - The shaking of movable objects (tables, vases, knick-knacks, ...)?

### Has it been witnessed or later observed

- ☐ Yes | ☒ **No** - The clattering of glasses and dishes in buffets?  
☐ Yes | ☒ **No** - The swaying of frames hanging on the wall?  
☐ Yes | ☒ **No** - The creaking of floors?  
☐ Yes | ☒ **No** - Small fragments of plaster falling from ceilings?  
☐ Yes | ☒ **No** - A confusion of the inhabitants (people leaving the house).

### Has it been observed

- ☐ Yes | ☒ **No** - Moving knick-knacks?  
☐ Yes | ☒ **No** - Moving light objects?  
 Which ones?:  
☐ Yes | ☒ **No** - The falling of frames hanging on the wall?  
☐ Yes | ☒ **No** - The falling of light objects placed on polished furniture or marble  
☐ Yes | ☒ **No** - Cracked or broken windows?  
☐ Yes | ☒ **No** - Broken crockery?  
☐ Yes | ☒ **No** - Light objects (vases, flower pots, etc.) spilled?  
☐ Yes | ☒ **No** - Has light furniture moved?  
☐ Yes | ☒ **No** - Has heavy furniture (chests, stoves, ...) vibrated?  
☐ Yes | ☒ **No** - Did bells tinkle?  
☐ Yes | ☒ **No** - Did heavy furniture move?  
☐ Yes | ☒ **No** - Did light furniture tip over?  
☐ Yes | ☒ **No** - Have doors been moved on their hinges?

### Has it been observed

- ☐ Yes | ☒ **No** - Falling pieces of plaster from the ceilings?  
☐ Yes | ☒ **No** - Cracks in wall plaster?  
☐ Yes | ☒ **No** - An exceptional fall of a chimney in poor condition?  
☐ Yes | ☒ **No** - An exceptional fall of some bricks?  
☐ Yes | ☒ **No** - Have there been several damaged chimneys?

How many?:

- ☐ Yes | ☒ **No** - Have there been several chimneys overturned?

How many?:

% for the municipality?:

- ☐ Yes | ☒ **No** - Have there been any falls of façade ornaments?

How important?:

- ☐ Yes | ☒ **No** - Have there been deep cracks in the brick walls?  
☐ Yes | ☒ **No** - Have there been deep cracks in the concrete walls?  
☐ Yes | ☒ **No** - Have there been landslides along the banks or slopes?

Importance:

ADDITIONAL COMMENTS:

## Official inquiry for FRAMERIES (BE)

Location: 50.411°N 3.894°E, at 16.6 km from the epicentre.

**Imin: 3 - Imax: 3**

### Did some residents perceive

- ☒ **Yes** | ☐ No - Light vibrations?  
☐ Yes | ☒ **No** - A characteristic noise: rumbling or rolling?

### Did many residents perceive

- ☐ Yes | ☒ **No** - A clear shaking of the building?  
☐ Yes | ☒ **No** - A loud rumble?

### Have we witnessed

- ☒ **Yes** | ☐ No - The oscillation of chandeliers or freely suspended objects?  
☒ **Yes** | ☐ No - Swinging chairs or beds?  
☐ Yes | ☒ **No** - Cracking ceilings?  
☒ **Yes** | ☐ No - Sleepers waking up?

### Has it been witnessed or later observed

- ☐ Yes | ☒ **No** - The shivering of windows and doors?  
☐ Yes | ☒ **No** - The shaking of movable objects (tables, vases, knick-knacks, ...)?

### Has it been witnessed or later observed

- ☐ Yes | ☒ **No** - The clattering of glasses and dishes in buffets?  
☐ Yes | ☒ **No** - The swaying of frames hanging on the wall?  
☐ Yes | ☒ **No** - The creaking of floors?  
☐ Yes | ☒ **No** - Small fragments of plaster falling from ceilings?  
☐ Yes | ☒ **No** - A confusion of the inhabitants (people leaving the house).

### Has it been observed

- ☐ Yes | ☒ **No** - Moving knick-knacks?  
☐ Yes | ☒ **No** - Moving light objects?  
 Which ones?:  
☐ Yes | ☒ **No** - The falling of frames hanging on the wall?  
☐ Yes | ☒ **No** - The falling of light objects placed on polished furniture or marble  
☐ Yes | ☒ **No** - Cracked or broken windows?  
☐ Yes | ☒ **No** - Broken crockery?  
☐ Yes | ☒ **No** - Light objects (vases, flower pots, etc.) spilled?  
☐ Yes | ☒ **No** - Has light furniture moved?  
☐ Yes | ☒ **No** - Has heavy furniture (chests, stoves, ...) vibrated?  
☐ Yes | ☒ **No** - Did bells tinkle?  
☐ Yes | ☒ **No** - Did heavy furniture move?  
☐ Yes | ☒ **No** - Did light furniture tip over?  
☐ Yes | ☒ **No** - Have doors been moved on their hinges?

### Has it been observed

- ☐ Yes | ☒ **No** - Falling pieces of plaster from the ceilings?  
☐ Yes | ☒ **No** - Cracks in wall plaster?  
☐ Yes | ☒ **No** - An exceptional fall of a chimney in poor condition?  
☐ Yes | ☒ **No** - An exceptional fall of some bricks?  
☐ Yes | ☒ **No** - Have there been several damaged chimneys?

How many?:

- ☐ Yes | ☒ **No** - Have there been several chimneys overturned?

How many?:

% for the municipality?:

- ☐ Yes | ☒ **No** - Have there been any falls of façade ornaments?

How important?:

- ☐ Yes | ☒ **No** - Have there been deep cracks in the brick walls?  
☐ Yes | ☒ **No** - Have there been deep cracks in the concrete walls?  
☐ Yes | ☒ **No** - Have there been landslides along the banks or slopes?

Importance:

ADDITIONAL COMMENTS: **Question 3 : A-t-on observé : l'oscillation de chaise ou de lit ? la cloison vitrée du guichet a oscillé, un mouvement de pendule a été ressenti par les employés assis à leur bureau.**

## Official inquiry for GENAPPE (BE)

Location: 50.612°N 4.452°E, at 29.6 km from the epicentre.

**Imin: 3 - Imax: 3**

### Did some residents perceive

- ☒ **Yes** | ☐ No - Light vibrations?  
☐ Yes | ☒ **No** - A characteristic noise: rumbling or rolling?

### Did many residents perceive

- ☐ Yes | ☒ **No** - A clear shaking of the building?  
☐ Yes | ☒ **No** - A loud rumble?

### Have we witnessed

- ☐ Yes | ☒ **No** - The oscillation of chandeliers or freely suspended objects?  
☒ **Yes** | ☐ No - Swinging chairs or beds?  
☐ Yes | ☒ **No** - Cracking ceilings?  
☐ Yes | ☒ **No** - Sleepers waking up?

### Has it been witnessed or later observed

- ☐ Yes | ☒ **No** - The shivering of windows and doors?  
☐ Yes | ☒ **No** - The shaking of movable objects (tables, vases, knick-knacks, ...)?

### Has it been witnessed or later observed

- ☐ Yes | ☒ **No** - The clattering of glasses and dishes in buffets?  
☐ Yes | ☒ **No** - The swaying of frames hanging on the wall?  
☐ Yes | ☒ **No** - The creaking of floors?  
☐ Yes | ☒ **No** - Small fragments of plaster falling from ceilings?  
☐ Yes | ☒ **No** - A confusion of the inhabitants (people leaving the house).

### Has it been observed

- ☐ Yes | ☒ **No** - Moving knick-knacks?  
☐ Yes | ☒ **No** - Moving light objects?  
 Which ones?:  
☐ Yes | ☒ **No** - The falling of frames hanging on the wall?  
☐ Yes | ☒ **No** - The falling of light objects placed on polished furniture or marble  
☐ Yes | ☒ **No** - Cracked or broken windows?  
☐ Yes | ☒ **No** - Broken crockery?  
☐ Yes | ☒ **No** - Light objects (vases, flower pots, etc.) spilled?  
☐ Yes | ☒ **No** - Has light furniture moved?  
☐ Yes | ☒ **No** - Has heavy furniture (chests, stoves, ...) vibrated?  
☐ Yes | ☒ **No** - Did bells tinkle?  
☐ Yes | ☒ **No** - Did heavy furniture move?  
☐ Yes | ☒ **No** - Did light furniture tip over?  
☐ Yes | ☒ **No** - Have doors been moved on their hinges?

### Has it been observed

- ☐ Yes | ☒ **No** - Falling pieces of plaster from the ceilings?  
☐ Yes | ☒ **No** - Cracks in wall plaster?  
☐ Yes | ☒ **No** - An exceptional fall of a chimney in poor condition?  
☐ Yes | ☒ **No** - An exceptional fall of some bricks?  
☐ Yes | ☒ **No** - Have there been several damaged chimneys?

How many?:

- ☐ Yes | ☒ **No** - Have there been several chimneys overturned?

How many?:

% for the municipality?:

- ☐ Yes | ☒ **No** - Have there been any falls of façade ornaments?

How important?:

- ☐ Yes | ☒ **No** - Have there been deep cracks in the brick walls?  
☐ Yes | ☒ **No** - Have there been deep cracks in the concrete walls?  
☐ Yes | ☒ **No** - Have there been landslides along the banks or slopes?

Importance:

ADDITIONAL COMMENTS:

## Official inquiry for GIVRY (BE)

Location: 50.38°N 4.03°E, at 10.1 km from the epicentre.

**Imin: 3 - Imax: 3**

### Did some residents perceive

- ☒ **Yes** | ☐ **No** - Light vibrations?  
☐ **Yes** | ☒ **No** - A characteristic noise: rumbling or rolling?

### Did many residents perceive

- ☐ **Yes** | ☒ **No** - A clear shaking of the building?  
☐ **Yes** | ☒ **No** - A loud rumble?

### Have we witnessed

- ☐ **Yes** | ☒ **No** - The oscillation of chandeliers or freely suspended objects?  
☐ **Yes** | ☒ **No** - Swinging chairs or beds?  
☐ **Yes** | ☒ **No** - Cracking ceilings?  
☐ **Yes** | ☒ **No** - Sleepers waking up?

### Has it been witnessed or later observed

- ☒ **Yes** | ☐ **No** - The shivering of windows and doors?  
☐ **Yes** | ☒ **No** - The shaking of movable objects (tables, vases, knick-knacks, ...)?

### Has it been witnessed or later observed

- ☐ **Yes** | ☒ **No** - The clattering of glasses and dishes in buffets?  
☐ **Yes** | ☒ **No** - The swaying of frames hanging on the wall?  
☐ **Yes** | ☒ **No** - The creaking of floors?  
☐ **Yes** | ☒ **No** - Small fragments of plaster falling from ceilings?  
☐ **Yes** | ☒ **No** - A confusion of the inhabitants (people leaving the house).

### Has it been observed

- ☐ **Yes** | ☒ **No** - Moving knick-knacks?  
☐ **Yes** | ☒ **No** - Moving light objects?  
 Which ones?:  
☐ **Yes** | ☒ **No** - The falling of frames hanging on the wall?  
☐ **Yes** | ☒ **No** - The falling of light objects placed on polished furniture or marble  
☐ **Yes** | ☒ **No** - Cracked or broken windows?  
☐ **Yes** | ☒ **No** - Broken crockery?  
☐ **Yes** | ☒ **No** - Light objects (vases, flower pots, etc.) spilled?  
☐ **Yes** | ☒ **No** - Has light furniture moved?  
☐ **Yes** | ☒ **No** - Has heavy furniture (chests, stoves, ...) vibrated?  
☐ **Yes** | ☒ **No** - Did bells tinkle?  
☐ **Yes** | ☒ **No** - Did heavy furniture move?  
☐ **Yes** | ☒ **No** - Did light furniture tip over?  
☐ **Yes** | ☒ **No** - Have doors been moved on their hinges?

### Has it been observed

- ☐ **Yes** | ☒ **No** - Falling pieces of plaster from the ceilings?  
☐ **Yes** | ☒ **No** - Cracks in wall plaster?  
☐ **Yes** | ☒ **No** - An exceptional fall of a chimney in poor condition?  
☐ **Yes** | ☒ **No** - An exceptional fall of some bricks?  
☐ **Yes** | ☒ **No** - Have there been several damaged chimneys?

How many?:

- ☐ **Yes** | ☒ **No** - Have there been several chimneys overturned?

How many?:

% for the municipality?:

- ☐ **Yes** | ☒ **No** - Have there been any falls of façade ornaments?

How important?:

- ☐ **Yes** | ☒ **No** - Have there been deep cracks in the brick walls?  
☐ **Yes** | ☒ **No** - Have there been deep cracks in the concrete walls?  
☐ **Yes** | ☒ **No** - Have there been landslides along the banks or slopes?

Importance:

ADDITIONAL COMMENTS:

## Official inquiry for GODARVILLE (BE)

Location: 50.495°N 4.287°E, at 12.9 km from the epicentre.

**Imin: 3 - Imax: 3**

### Did some residents perceive

- ☒ **Yes** | ☐ **No** - Light vibrations?  
☐ **Yes** | ☒ **No** - A characteristic noise: rumbling or rolling?

### Did many residents perceive

- ☐ **Yes** | ☒ **No** - A clear shaking of the building?  
☐ **Yes** | ☒ **No** - A loud rumble?

### Have we witnessed

- ☒ **Yes** | ☐ **No** - The oscillation of chandeliers or freely suspended objects?  
☐ **Yes** | ☒ **No** - Swinging chairs or beds?  
☐ **Yes** | ☒ **No** - Cracking ceilings?  
☐ **Yes** | ☒ **No** - Sleepers waking up?

### Has it been witnessed or later observed

- ☐ **Yes** | ☒ **No** - The shivering of windows and doors?  
☐ **Yes** | ☒ **No** - The shaking of movable objects (tables, vases, knick-knacks, ...)?

### Has it been witnessed or later observed

- ☐ **Yes** | ☒ **No** - The clattering of glasses and dishes in buffets?  
☐ **Yes** | ☒ **No** - The swaying of frames hanging on the wall?  
☐ **Yes** | ☒ **No** - The creaking of floors?  
☐ **Yes** | ☒ **No** - Small fragments of plaster falling from ceilings?  
☐ **Yes** | ☒ **No** - A confusion of the inhabitants (people leaving the house).

### Has it been observed

- ☐ **Yes** | ☒ **No** - Moving knick-knacks?  
☐ **Yes** | ☒ **No** - Moving light objects?  
 Which ones?:  
☐ **Yes** | ☒ **No** - The falling of frames hanging on the wall?  
☐ **Yes** | ☒ **No** - The falling of light objects placed on polished furniture or marble  
☐ **Yes** | ☒ **No** - Cracked or broken windows?  
☐ **Yes** | ☒ **No** - Broken crockery?  
☐ **Yes** | ☒ **No** - Light objects (vases, flower pots, etc.) spilled?  
☐ **Yes** | ☒ **No** - Has light furniture moved?  
☐ **Yes** | ☒ **No** - Has heavy furniture (chests, stoves, ...) vibrated?  
☐ **Yes** | ☒ **No** - Did bells tinkle?  
☐ **Yes** | ☒ **No** - Did heavy furniture move?  
☐ **Yes** | ☒ **No** - Did light furniture tip over?  
☐ **Yes** | ☒ **No** - Have doors been moved on their hinges?

### Has it been observed

- ☐ **Yes** | ☒ **No** - Falling pieces of plaster from the ceilings?  
☐ **Yes** | ☒ **No** - Cracks in wall plaster?  
☐ **Yes** | ☒ **No** - An exceptional fall of a chimney in poor condition?  
☐ **Yes** | ☒ **No** - An exceptional fall of some bricks?  
☐ **Yes** | ☒ **No** - Have there been several damaged chimneys?

How many?:

- ☐ **Yes** | ☒ **No** - Have there been several chimneys overturned?

How many?:

% for the municipality?:

- ☐ **Yes** | ☒ **No** - Have there been any falls of façade ornaments?

How important?:

- ☐ **Yes** | ☒ **No** - Have there been deep cracks in the brick walls?  
☐ **Yes** | ☒ **No** - Have there been deep cracks in the concrete walls?  
☐ **Yes** | ☒ **No** - Have there been landslides along the banks or slopes?

Importance:

ADDITIONAL COMMENTS:

## Official inquiry for GOZEE (BE)

Location: 50.332°N 4.353°E, at 21.1 km from the epicentre.

**Imin: 3 - Imax: 3**

### Did some residents perceive

- ☒ **Yes** | ☐ No - Light vibrations?  
☐ Yes | ☒ **No** - A characteristic noise: rumbling or rolling?

### Did many residents perceive

- ☐ Yes | ☒ **No** - A clear shaking of the building?  
☐ Yes | ☒ **No** - A loud rumble?

### Have we witnessed

- ☐ Yes | ☒ **No** - The oscillation of chandeliers or freely suspended objects?  
☐ Yes | ☒ **No** - Swinging chairs or beds?  
☐ Yes | ☒ **No** - Cracking ceilings?  
☐ Yes | ☒ **No** - Sleepers waking up?

### Has it been witnessed or later observed

- ☒ **Yes** | ☐ No - The shivering of windows and doors?  
☐ Yes | ☒ **No** - The shaking of movable objects (tables, vases, knick-knacks, ...)?

### Has it been witnessed or later observed

- ☒ **Yes** | ☐ No - The clattering of glasses and dishes in buffets?  
☐ Yes | ☒ **No** - The swaying of frames hanging on the wall?  
☐ Yes | ☒ **No** - The creaking of floors?  
☐ Yes | ☒ **No** - Small fragments of plaster falling from ceilings?  
☐ Yes | ☒ **No** - A confusion of the inhabitants (people leaving the house).

### Has it been observed

- ☐ Yes | ☒ **No** - Moving knick-knacks?  
☐ Yes | ☒ **No** - Moving light objects?  
 Which ones?:  
☐ Yes | ☒ **No** - The falling of frames hanging on the wall?  
☐ Yes | ☒ **No** - The falling of light objects placed on polished furniture or marble  
☐ Yes | ☒ **No** - Cracked or broken windows?  
☐ Yes | ☒ **No** - Broken crockery?  
☐ Yes | ☒ **No** - Light objects (vases, flower pots, etc.) spilled?  
☐ Yes | ☒ **No** - Has light furniture moved?  
☐ Yes | ☒ **No** - Has heavy furniture (chests, stoves, ...) vibrated?  
☐ Yes | ☒ **No** - Did bells tinkle?  
☐ Yes | ☒ **No** - Did heavy furniture move?  
☐ Yes | ☒ **No** - Did light furniture tip over?  
☐ Yes | ☒ **No** - Have doors been moved on their hinges?

### Has it been observed

- ☐ Yes | ☒ **No** - Falling pieces of plaster from the ceilings?  
☐ Yes | ☒ **No** - Cracks in wall plaster?  
☐ Yes | ☒ **No** - An exceptional fall of a chimney in poor condition?  
☐ Yes | ☒ **No** - An exceptional fall of some bricks?  
☐ Yes | ☒ **No** - Have there been several damaged chimneys?

How many?:

- ☐ Yes | ☒ **No** - Have there been several chimneys overturned?

How many?:

% for the municipality?:

- ☐ Yes | ☒ **No** - Have there been any falls of façade ornaments?

How important?:

- ☐ Yes | ☒ **No** - Have there been deep cracks in the brick walls?  
☐ Yes | ☒ **No** - Have there been deep cracks in the concrete walls?  
☐ Yes | ☒ **No** - Have there been landslides along the banks or slopes?

Importance:

ADDITIONAL COMMENTS:

## Official inquiry for GRANDMETZ (BE)

Location: 50.623°N 3.633°E, at 40.2 km from the epicentre.

**Imin: 3 - Imax: 3**

### Did some residents perceive

- ☐ Yes | ☒ **No** - Light vibrations?  
☒ **Yes** | ☐ No - A characteristic noise: rumbling or rolling?

### Did many residents perceive

- ☐ Yes | ☒ **No** - A clear shaking of the building?  
☐ Yes | ☒ **No** - A loud rumble?

### Have we witnessed

- ☐ Yes | ☒ **No** - The oscillation of chandeliers or freely suspended objects?  
☐ Yes | ☒ **No** - Swinging chairs or beds?  
☐ Yes | ☒ **No** - Cracking ceilings?  
☐ Yes | ☒ **No** - Sleepers waking up?

### Has it been witnessed or later observed

- ☐ Yes | ☒ **No** - The shivering of windows and doors?  
☐ Yes | ☒ **No** - The shaking of movable objects (tables, vases, knick-knacks, ...)?

### Has it been witnessed or later observed

- ☐ Yes | ☒ **No** - The clattering of glasses and dishes in buffets?  
☐ Yes | ☒ **No** - The swaying of frames hanging on the wall?  
☐ Yes | ☒ **No** - The creaking of floors?  
☐ Yes | ☒ **No** - Small fragments of plaster falling from ceilings?  
☐ Yes | ☒ **No** - A confusion of the inhabitants (people leaving the house).

### Has it been observed

- ☐ Yes | ☒ **No** - Moving knick-knacks?  
☐ Yes | ☒ **No** - Moving light objects?

Which ones?:

- ☐ Yes | ☒ **No** - The falling of frames hanging on the wall?  
☐ Yes | ☒ **No** - The falling of light objects placed on polished furniture or marble  
☐ Yes | ☒ **No** - Cracked or broken windows?  
☐ Yes | ☒ **No** - Broken crockery?  
☐ Yes | ☒ **No** - Light objects (vases, flower pots, etc.) spilled?  
☐ Yes | ☒ **No** - Has light furniture moved?  
☐ Yes | ☒ **No** - Has heavy furniture (chests, stoves, ...) vibrated?  
☐ Yes | ☒ **No** - Did bells tinkle?  
☐ Yes | ☒ **No** - Did heavy furniture move?  
☐ Yes | ☒ **No** - Did light furniture tip over?  
☐ Yes | ☒ **No** - Have doors been moved on their hinges?

### Has it been observed

- ☐ Yes | ☒ **No** - Falling pieces of plaster from the ceilings?  
☐ Yes | ☒ **No** - Cracks in wall plaster?  
☐ Yes | ☒ **No** - An exceptional fall of a chimney in poor condition?  
☐ Yes | ☒ **No** - An exceptional fall of some bricks?  
☐ Yes | ☒ **No** - Have there been several damaged chimneys?

How many?:

- ☐ Yes | ☒ **No** - Have there been several chimneys overturned?

How many?:

% for the municipality?:

- ☐ Yes | ☒ **No** - Have there been any falls of façade ornaments?

How important?:

- ☐ Yes | ☒ **No** - Have there been deep cracks in the brick walls?  
☐ Yes | ☒ **No** - Have there been deep cracks in the concrete walls?  
☐ Yes | ☒ **No** - Have there been landslides along the banks or slopes?

Importance:

ADDITIONAL COMMENTS:

## Official inquiry for GRATY (BE)

Location: 50.632°N 3.999°E, at 22.0 km from the epicentre.

**Imin: 3 - Imax: 3**

### Did some residents perceive

- ☒ **Yes** | ☐ No - Light vibrations?  
☐ Yes | ☒ **No** - A characteristic noise: rumbling or rolling?

### Did many residents perceive

- ☐ Yes | ☒ **No** - A clear shaking of the building?  
☐ Yes | ☒ **No** - A loud rumble?

### Have we witnessed

- ☐ Yes | ☒ **No** - The oscillation of chandeliers or freely suspended objects?  
☐ Yes | ☒ **No** - Swinging chairs or beds?  
☐ Yes | ☒ **No** - Cracking ceilings?  
☐ Yes | ☒ **No** - Sleepers waking up?

### Has it been witnessed or later observed

- ☐ Yes | ☒ **No** - The shivering of windows and doors?  
☒ **Yes** | ☐ No - The shaking of movable objects (tables, vases, knick-knacks, ...)?

### Has it been witnessed or later observed

- ☒ **Yes** | ☐ No - The clattering of glasses and dishes in buffets?  
☐ Yes | ☒ **No** - The swaying of frames hanging on the wall?  
☐ Yes | ☒ **No** - The creaking of floors?  
☐ Yes | ☒ **No** - Small fragments of plaster falling from ceilings?  
☐ Yes | ☒ **No** - A confusion of the inhabitants (people leaving the house).

### Has it been observed

- ☐ Yes | ☒ **No** - Moving knick-knacks?  
☐ Yes | ☒ **No** - Moving light objects?  
 Which ones?:  
☐ Yes | ☒ **No** - The falling of frames hanging on the wall?  
☐ Yes | ☒ **No** - The falling of light objects placed on polished furniture or marble  
☐ Yes | ☒ **No** - Cracked or broken windows?  
☐ Yes | ☒ **No** - Broken crockery?  
☐ Yes | ☒ **No** - Light objects (vases, flower pots, etc.) spilled?  
☐ Yes | ☒ **No** - Has light furniture moved?  
☐ Yes | ☒ **No** - Has heavy furniture (chests, stoves, ...) vibrated?  
☐ Yes | ☒ **No** - Did bells tinkle?  
☐ Yes | ☒ **No** - Did heavy furniture move?  
☐ Yes | ☒ **No** - Did light furniture tip over?  
☐ Yes | ☒ **No** - Have doors been moved on their hinges?

### Has it been observed

- ☐ Yes | ☒ **No** - Falling pieces of plaster from the ceilings?  
☐ Yes | ☒ **No** - Cracks in wall plaster?  
☐ Yes | ☒ **No** - An exceptional fall of a chimney in poor condition?  
☐ Yes | ☒ **No** - An exceptional fall of some bricks?  
☐ Yes | ☒ **No** - Have there been several damaged chimneys?

How many?:

- ☐ Yes | ☒ **No** - Have there been several chimneys overturned?

How many?:

% for the municipality?:

- ☐ Yes | ☒ **No** - Have there been any falls of façade ornaments?

How important?:

- ☐ Yes | ☒ **No** - Have there been deep cracks in the brick walls?  
☐ Yes | ☒ **No** - Have there been deep cracks in the concrete walls?  
☐ Yes | ☒ **No** - Have there been landslides along the banks or slopes?

Importance:

ADDITIONAL COMMENTS:

## Official inquiry for HAINE-SAINT-PAUL (BE)

Location: 50.455°N 4.19°E, at 5.0 km from the epicentre.

Imin: 5 - Imax: 5

### Did some residents perceive

- ☒ **Yes** | ☐ No - Light vibrations?  
☒ **Yes** | ☐ No - A characteristic noise: rumbling or rolling?

### Did many residents perceive

- ☒ **Yes** | ☐ No - A clear shaking of the building?  
☐ Yes | ☒ **No** - A loud rumble?

### Have we witnessed

- ☒ **Yes** | ☐ No - The oscillation of chandeliers or freely suspended objects?  
☒ **Yes** | ☐ No - Swinging chairs or beds?  
☐ Yes | ☒ **No** - Cracking ceilings?  
☒ **Yes** | ☐ No - Sleepers waking up?

### Has it been witnessed or later observed

- ☒ **Yes** | ☐ No - The shivering of windows and doors?  
☒ **Yes** | ☐ No - The shaking of movable objects (tables, vases, knick-knacks, ...)?

### Has it been witnessed or later observed

- ☒ **Yes** | ☐ No - The clattering of glasses and dishes in buffets?  
☐ Yes | ☒ **No** - The swaying of frames hanging on the wall?  
☐ Yes | ☒ **No** - The creaking of floors?  
☐ Yes | ☒ **No** - Small fragments of plaster falling from ceilings?  
☒ **Yes** | ☐ No - A confusion of the inhabitants (people leaving the house).

### Has it been observed

- ☐ Yes | ☒ **No** - Moving knick-knacks?  
☐ Yes | ☒ **No** - Moving light objects?  
 Which ones?:  
☐ Yes | ☒ **No** - The falling of frames hanging on the wall?  
☐ Yes | ☒ **No** - The falling of light objects placed on polished furniture or marble  
☐ Yes | ☒ **No** - Cracked or broken windows?  
☐ Yes | ☒ **No** - Broken crockery?  
☐ Yes | ☒ **No** - Light objects (vases, flower pots, etc.) spilled?  
☐ Yes | ☒ **No** - Has light furniture moved?  
☐ Yes | ☒ **No** - Has heavy furniture (chests, stoves, ...) vibrated?  
☐ Yes | ☒ **No** - Did bells tinkle?  
☐ Yes | ☒ **No** - Did heavy furniture move?  
☐ Yes | ☒ **No** - Did light furniture tip over?  
☐ Yes | ☒ **No** - Have doors been moved on their hinges?

### Has it been observed

- ☐ Yes | ☒ **No** - Falling pieces of plaster from the ceilings?  
☐ Yes | ☒ **No** - Cracks in wall plaster?  
☐ Yes | ☒ **No** - An exceptional fall of a chimney in poor condition?  
☒ **Yes** | ☐ No - An exceptional fall of some bricks?  
☒ **Yes** | ☐ No - Have there been several damaged chimneys?

How many?: **2 ou 3**

- ☐ Yes | ☒ **No** - Have there been several chimneys overturned?

How many?:

% for the municipality?:

- ☐ Yes | ☒ **No** - Have there been any falls of façade ornaments?

How important?:

- ☐ Yes | ☒ **No** - Have there been deep cracks in the brick walls?  
☐ Yes | ☒ **No** - Have there been deep cracks in the concrete walls?  
☐ Yes | ☒ **No** - Have there been landslides along the banks or slopes?

Importance:

ADDITIONAL COMMENTS:

## Official inquiry for HAINE-SAINT-PIERRE (BE)

Location: 50.456°N 4.206°E, at 6.1 km from the epicentre.

**Imin: 5 - Imax: 5**

### Did some residents perceive

- ☒ **Yes** | ☐ No - Light vibrations?  
☒ **Yes** | ☐ No - A characteristic noise: rumbling or rolling?

### Did many residents perceive

- ☒ **Yes** | ☐ No - A clear shaking of the building?  
☒ **Yes** | ☐ No - A loud rumble?

### Have we witnessed

- ☒ **Yes** | ☐ No - The oscillation of chandeliers or freely suspended objects?  
☒ **Yes** | ☐ No - Swinging chairs or beds?  
☒ **Yes** | ☐ No - Cracking ceilings?  
☒ **Yes** | ☐ No - Sleepers waking up?

### Has it been witnessed or later observed

- ☒ **Yes** | ☐ No - The shivering of windows and doors?  
☒ **Yes** | ☐ No - The shaking of movable objects (tables, vases, knick-knacks, ...)?

### Has it been witnessed or later observed

- ☒ **Yes** | ☐ No - The clattering of glasses and dishes in buffets?  
☒ **Yes** | ☐ No - The swaying of frames hanging on the wall?  
☒ **Yes** | ☐ No - The creaking of floors?  
☒ **Yes** | ☐ No - Small fragments of plaster falling from ceilings?  
☒ **Yes** | ☐ No - A confusion of the inhabitants (people leaving the house).

### Has it been observed

- ☒ **Yes** | ☐ No - Moving knick-knacks?  
☐ Yes | ☒ **No** - Moving light objects?  
 Which ones?:  
☐ Yes | ☒ **No** - The falling of frames hanging on the wall?  
☐ Yes | ☒ **No** - The falling of light objects placed on polished furniture or marble  
☐ Yes | ☒ **No** - Cracked or broken windows?  
☐ Yes | ☒ **No** - Broken crockery?  
☐ Yes | ☒ **No** - Light objects (vases, flower pots, etc.) spilled?  
☐ Yes | ☒ **No** - Has light furniture moved?  
☒ **Yes** | ☐ No - Has heavy furniture (chests, stoves, ...) vibrated?  
☐ Yes | ☒ **No** - Did bells tinkle?  
☐ Yes | ☒ **No** - Did heavy furniture move?  
☐ Yes | ☒ **No** - Did light furniture tip over?  
☐ Yes | ☒ **No** - Have doors been moved on their hinges?

### Has it been observed

- ☐ Yes | ☒ **No** - Falling pieces of plaster from the ceilings?  
☐ Yes | ☒ **No** - Cracks in wall plaster?  
☐ Yes | ☒ **No** - An exceptional fall of a chimney in poor condition?  
☐ Yes | ☒ **No** - An exceptional fall of some bricks?  
☐ Yes | ☒ **No** - Have there been several damaged chimneys?

How many?:

- ☐ Yes | ☒ **No** - Have there been several chimneys overturned?

How many?:

% for the municipality?:

- ☐ Yes | ☒ **No** - Have there been any falls of façade ornaments?

How important?:

- ☐ Yes | ☒ **No** - Have there been deep cracks in the brick walls?  
☐ Yes | ☒ **No** - Have there been deep cracks in the concrete walls?  
☐ Yes | ☒ **No** - Have there been landslides along the banks or slopes?

Importance:

ADDITIONAL COMMENTS:

## Official inquiry for HARMIGNIES (BE)

Location: 50.404°N 4.019°E, at 8.8 km from the epicentre.

**Imin: 3 - Imax: 3**

### Did some residents perceive

- ☒ **Yes** | ☐ No - Light vibrations?  
☐ Yes | ☒ **No** - A characteristic noise: rumbling or rolling?

### Did many residents perceive

- ☐ Yes | ☒ **No** - A clear shaking of the building?  
☐ Yes | ☒ **No** - A loud rumble?

### Have we witnessed

- ☐ Yes | ☒ **No** - The oscillation of chandeliers or freely suspended objects?  
☒ **Yes** | ☐ No - Swinging chairs or beds?  
☐ Yes | ☒ **No** - Cracking ceilings?  
☐ Yes | ☒ **No** - Sleepers waking up?

### Has it been witnessed or later observed

- ☐ Yes | ☒ **No** - The shivering of windows and doors?  
☒ **Yes** | ☐ No - The shaking of movable objects (tables, vases, knick-knacks, ...)?

### Has it been witnessed or later observed

- ☐ Yes | ☒ **No** - The clattering of glasses and dishes in buffets?  
☐ Yes | ☒ **No** - The swaying of frames hanging on the wall?  
☐ Yes | ☒ **No** - The creaking of floors?  
☐ Yes | ☒ **No** - Small fragments of plaster falling from ceilings?  
☐ Yes | ☒ **No** - A confusion of the inhabitants (people leaving the house).

### Has it been observed

- ☐ Yes | ☒ **No** - Moving knick-knacks?  
☐ Yes | ☒ **No** - Moving light objects?  
 Which ones?:  
☐ Yes | ☒ **No** - The falling of frames hanging on the wall?  
☐ Yes | ☒ **No** - The falling of light objects placed on polished furniture or marble  
☐ Yes | ☒ **No** - Cracked or broken windows?  
☐ Yes | ☒ **No** - Broken crockery?  
☐ Yes | ☒ **No** - Light objects (vases, flower pots, etc.) spilled?  
☐ Yes | ☒ **No** - Has light furniture moved?  
☐ Yes | ☒ **No** - Has heavy furniture (chests, stoves, ...) vibrated?  
☐ Yes | ☒ **No** - Did bells tinkle?  
☐ Yes | ☒ **No** - Did heavy furniture move?  
☐ Yes | ☒ **No** - Did light furniture tip over?  
☐ Yes | ☒ **No** - Have doors been moved on their hinges?

### Has it been observed

- ☐ Yes | ☒ **No** - Falling pieces of plaster from the ceilings?  
☐ Yes | ☒ **No** - Cracks in wall plaster?  
☐ Yes | ☒ **No** - An exceptional fall of a chimney in poor condition?  
☐ Yes | ☒ **No** - An exceptional fall of some bricks?  
☐ Yes | ☒ **No** - Have there been several damaged chimneys?

How many?:

- ☐ Yes | ☒ **No** - Have there been several chimneys overturned?

How many?:

% for the municipality?:

- ☐ Yes | ☒ **No** - Have there been any falls of façade ornaments?

How important?:

- ☐ Yes | ☒ **No** - Have there been deep cracks in the brick walls?  
☐ Yes | ☒ **No** - Have there been deep cracks in the concrete walls?  
☐ Yes | ☒ **No** - Have there been landslides along the banks or slopes?

Importance:

ADDITIONAL COMMENTS:

## Official inquiry for HARVENG (BE)

Location: 50.396°N 3.988°E, at 11.2 km from the epicentre.

**Imin: 3 - Imax: 3**

### Did some residents perceive

- ☒ **Yes** | ☐ **No** - Light vibrations?  
☐ **Yes** | ☒ **No** - A characteristic noise: rumbling or rolling?

### Did many residents perceive

- ☐ **Yes** | ☒ **No** - A clear shaking of the building?  
☐ **Yes** | ☒ **No** - A loud rumble?

### Have we witnessed

- ☐ **Yes** | ☒ **No** - The oscillation of chandeliers or freely suspended objects?  
☐ **Yes** | ☒ **No** - Swinging chairs or beds?  
☐ **Yes** | ☒ **No** - Cracking ceilings?  
☐ **Yes** | ☒ **No** - Sleepers waking up?

### Has it been witnessed or later observed

- ☒ **Yes** | ☐ **No** - The shivering of windows and doors?  
☐ **Yes** | ☒ **No** - The shaking of movable objects (tables, vases, knick-knacks, ...)?

### Has it been witnessed or later observed

- ☐ **Yes** | ☒ **No** - The clattering of glasses and dishes in buffets?  
☐ **Yes** | ☒ **No** - The swaying of frames hanging on the wall?  
☐ **Yes** | ☒ **No** - The creaking of floors?  
☐ **Yes** | ☒ **No** - Small fragments of plaster falling from ceilings?  
☐ **Yes** | ☒ **No** - A confusion of the inhabitants (people leaving the house).

### Has it been observed

- ☐ **Yes** | ☒ **No** - Moving knick-knacks?  
☐ **Yes** | ☒ **No** - Moving light objects?  
 Which ones?:  
☐ **Yes** | ☒ **No** - The falling of frames hanging on the wall?  
☐ **Yes** | ☒ **No** - The falling of light objects placed on polished furniture or marble  
☐ **Yes** | ☒ **No** - Cracked or broken windows?  
☐ **Yes** | ☒ **No** - Broken crockery?  
☐ **Yes** | ☒ **No** - Light objects (vases, flower pots, etc.) spilled?  
☐ **Yes** | ☒ **No** - Has light furniture moved?  
☐ **Yes** | ☒ **No** - Has heavy furniture (chests, stoves, ...) vibrated?  
☐ **Yes** | ☒ **No** - Did bells tinkle?  
☐ **Yes** | ☒ **No** - Did heavy furniture move?  
☐ **Yes** | ☒ **No** - Did light furniture tip over?  
☐ **Yes** | ☒ **No** - Have doors been moved on their hinges?

### Has it been observed

- ☐ **Yes** | ☒ **No** - Falling pieces of plaster from the ceilings?  
☐ **Yes** | ☒ **No** - Cracks in wall plaster?  
☐ **Yes** | ☒ **No** - An exceptional fall of a chimney in poor condition?  
☐ **Yes** | ☒ **No** - An exceptional fall of some bricks?  
☐ **Yes** | ☒ **No** - Have there been several damaged chimneys?

How many?:

- ☐ **Yes** | ☒ **No** - Have there been several chimneys overturned?

How many?:

% for the municipality?:

- ☐ **Yes** | ☒ **No** - Have there been any falls of façade ornaments?

How important?:

- ☐ **Yes** | ☒ **No** - Have there been deep cracks in the brick walls?  
☐ **Yes** | ☒ **No** - Have there been deep cracks in the concrete walls?  
☐ **Yes** | ☒ **No** - Have there been landslides along the banks or slopes?

Importance:

ADDITIONAL COMMENTS:

## Official inquiry for HAULCHIN (BE)

Location: 50.384°N 4.083°E, at 7.8 km from the epicentre.

**Imin: 2 - Imax: 2**

### Did some residents perceive

- ☒ **Yes** | ☐ **No** - Light vibrations?  
☐ **Yes** | ☒ **No** - A characteristic noise: rumbling or rolling?

### Did many residents perceive

- ☐ **Yes** | ☒ **No** - A clear shaking of the building?  
☐ **Yes** | ☒ **No** - A loud rumble?

### Have we witnessed

- ☐ **Yes** | ☒ **No** - The oscillation of chandeliers or freely suspended objects?  
☐ **Yes** | ☒ **No** - Swinging chairs or beds?  
☐ **Yes** | ☒ **No** - Cracking ceilings?  
☐ **Yes** | ☒ **No** - Sleepers waking up?

### Has it been witnessed or later observed

- ☐ **Yes** | ☒ **No** - The shivering of windows and doors?  
☐ **Yes** | ☒ **No** - The shaking of movable objects (tables, vases, knick-knacks, ...)?

### Has it been witnessed or later observed

- ☐ **Yes** | ☒ **No** - The clattering of glasses and dishes in buffets?  
☐ **Yes** | ☒ **No** - The swaying of frames hanging on the wall?  
☐ **Yes** | ☒ **No** - The creaking of floors?  
☐ **Yes** | ☒ **No** - Small fragments of plaster falling from ceilings?  
☐ **Yes** | ☒ **No** - A confusion of the inhabitants (people leaving the house).

### Has it been observed

- ☐ **Yes** | ☒ **No** - Moving knick-knacks?  
☐ **Yes** | ☒ **No** - Moving light objects?  
 Which ones?:  
☐ **Yes** | ☒ **No** - The falling of frames hanging on the wall?  
☐ **Yes** | ☒ **No** - The falling of light objects placed on polished furniture or marble  
☐ **Yes** | ☒ **No** - Cracked or broken windows?  
☐ **Yes** | ☒ **No** - Broken crockery?  
☐ **Yes** | ☒ **No** - Light objects (vases, flower pots, etc.) spilled?  
☐ **Yes** | ☒ **No** - Has light furniture moved?  
☐ **Yes** | ☒ **No** - Has heavy furniture (chests, stoves, ...) vibrated?  
☐ **Yes** | ☒ **No** - Did bells tinkle?  
☐ **Yes** | ☒ **No** - Did heavy furniture move?  
☐ **Yes** | ☒ **No** - Did light furniture tip over?  
☐ **Yes** | ☒ **No** - Have doors been moved on their hinges?

### Has it been observed

- ☐ **Yes** | ☒ **No** - Falling pieces of plaster from the ceilings?  
☐ **Yes** | ☒ **No** - Cracks in wall plaster?  
☐ **Yes** | ☒ **No** - An exceptional fall of a chimney in poor condition?  
☐ **Yes** | ☒ **No** - An exceptional fall of some bricks?  
☐ **Yes** | ☒ **No** - Have there been several damaged chimneys?

How many?:

- ☐ **Yes** | ☒ **No** - Have there been several chimneys overturned?

How many?:

% for the municipality?:

- ☐ **Yes** | ☒ **No** - Have there been any falls of façade ornaments?

How important?:

- ☐ **Yes** | ☒ **No** - Have there been deep cracks in the brick walls?  
☐ **Yes** | ☒ **No** - Have there been deep cracks in the concrete walls?  
☐ **Yes** | ☒ **No** - Have there been landslides along the banks or slopes?

Importance:

ADDITIONAL COMMENTS:

## Official inquiry for HAVAY (BE)

Location: 50.362°N 3.986°E, at 13.7 km from the epicentre.

**Imin: 3 - Imax: 3**

### Did some residents perceive

- ☒ **Yes** | ☐ No - Light vibrations?  
☐ Yes | ☒ **No** - A characteristic noise: rumbling or rolling?

### Did many residents perceive

- ☐ Yes | ☒ **No** - A clear shaking of the building?  
☐ Yes | ☒ **No** - A loud rumble?

### Have we witnessed

- ☒ **Yes** | ☐ No - The oscillation of chandeliers or freely suspended objects?  
☐ Yes | ☒ **No** - Swinging chairs or beds?  
☐ Yes | ☒ **No** - Cracking ceilings?  
☐ Yes | ☒ **No** - Sleepers waking up?

### Has it been witnessed or later observed

- ☐ Yes | ☒ **No** - The shivering of windows and doors?  
☐ Yes | ☒ **No** - The shaking of movable objects (tables, vases, knick-knacks, ...)?

### Has it been witnessed or later observed

- ☐ Yes | ☒ **No** - The clattering of glasses and dishes in buffets?  
☐ Yes | ☒ **No** - The swaying of frames hanging on the wall?  
☐ Yes | ☒ **No** - The creaking of floors?  
☐ Yes | ☒ **No** - Small fragments of plaster falling from ceilings?  
☐ Yes | ☒ **No** - A confusion of the inhabitants (people leaving the house).

### Has it been observed

- ☐ Yes | ☒ **No** - Moving knick-knacks?  
☐ Yes | ☒ **No** - Moving light objects?  
 Which ones?:  
☐ Yes | ☒ **No** - The falling of frames hanging on the wall?  
☐ Yes | ☒ **No** - The falling of light objects placed on polished furniture or marble  
☐ Yes | ☒ **No** - Cracked or broken windows?  
☐ Yes | ☒ **No** - Broken crockery?  
☐ Yes | ☒ **No** - Light objects (vases, flower pots, etc.) spilled?  
☐ Yes | ☒ **No** - Has light furniture moved?  
☐ Yes | ☒ **No** - Has heavy furniture (chests, stoves, ...) vibrated?  
☐ Yes | ☒ **No** - Did bells tinkle?  
☐ Yes | ☒ **No** - Did heavy furniture move?  
☐ Yes | ☒ **No** - Did light furniture tip over?  
☐ Yes | ☒ **No** - Have doors been moved on their hinges?

### Has it been observed

- ☐ Yes | ☒ **No** - Falling pieces of plaster from the ceilings?  
☐ Yes | ☒ **No** - Cracks in wall plaster?  
☐ Yes | ☒ **No** - An exceptional fall of a chimney in poor condition?  
☐ Yes | ☒ **No** - An exceptional fall of some bricks?  
☐ Yes | ☒ **No** - Have there been several damaged chimneys?

How many?:

- ☐ Yes | ☒ **No** - Have there been several chimneys overturned?

How many?:

% for the municipality?:

- ☐ Yes | ☒ **No** - Have there been any falls of façade ornaments?

How important?:

- ☐ Yes | ☒ **No** - Have there been deep cracks in the brick walls?  
☐ Yes | ☒ **No** - Have there been deep cracks in the concrete walls?  
☐ Yes | ☒ **No** - Have there been landslides along the banks or slopes?

Importance:

ADDITIONAL COMMENTS:

## Official inquiry for HAVRE (BE)

Location: 50.466°N 4.047°E, at 5.5 km from the epicentre.

**Imin: 4 - Imax: 4**

### Did some residents perceive

- ☒ **Yes** | ☐ No - Light vibrations?  
☐ Yes | ☒ **No** - A characteristic noise: rumbling or rolling?

### Did many residents perceive

- ☒ **Yes** | ☐ No - A clear shaking of the building?  
☐ Yes | ☒ **No** - A loud rumble?

### Have we witnessed

- ☒ **Yes** | ☐ No - The oscillation of chandeliers or freely suspended objects?  
☐ Yes | ☒ **No** - Swinging chairs or beds?  
☐ Yes | ☒ **No** - Cracking ceilings?  
☒ **Yes** | ☐ No - Sleepers waking up?

### Has it been witnessed or later observed

- ☒ **Yes** | ☐ No - The shivering of windows and doors?  
☒ **Yes** | ☐ No - The shaking of movable objects (tables, vases, knick-knacks, ...)?

### Has it been witnessed or later observed

- ☐ Yes | ☒ **No** - The clattering of glasses and dishes in buffets?  
☐ Yes | ☒ **No** - The swaying of frames hanging on the wall?  
☐ Yes | ☒ **No** - The creaking of floors?  
☐ Yes | ☒ **No** - Small fragments of plaster falling from ceilings?  
☒ **Yes** | ☐ No - A confusion of the inhabitants (people leaving the house).

### Has it been observed

- ☒ **Yes** | ☐ No - Moving knick-knacks?  
☒ **Yes** | ☐ No - Moving light objects?

Which ones?: **vases**

- ☐ Yes | ☒ **No** - The falling of frames hanging on the wall?  
☐ Yes | ☒ **No** - The falling of light objects placed on polished furniture or marble  
☐ Yes | ☒ **No** - Cracked or broken windows?  
☐ Yes | ☒ **No** - Broken crockery?  
☐ Yes | ☒ **No** - Light objects (vases, flower pots, etc.) spilled?  
☐ Yes | ☒ **No** - Has light furniture moved?  
☐ Yes | ☒ **No** - Has heavy furniture (chests, stoves, ...) vibrated?  
☐ Yes | ☒ **No** - Did bells tinkle?  
☐ Yes | ☒ **No** - Did heavy furniture move?  
☐ Yes | ☒ **No** - Did light furniture tip over?  
☐ Yes | ☒ **No** - Have doors been moved on their hinges?

### Has it been observed

- ☐ Yes | ☒ **No** - Falling pieces of plaster from the ceilings?  
☐ Yes | ☒ **No** - Cracks in wall plaster?  
☐ Yes | ☒ **No** - An exceptional fall of a chimney in poor condition?  
☐ Yes | ☒ **No** - An exceptional fall of some bricks?  
☐ Yes | ☒ **No** - Have there been several damaged chimneys?

How many?:

- ☐ Yes | ☒ **No** - Have there been several chimneys overturned?

How many?:

% for the municipality?:

- ☐ Yes | ☒ **No** - Have there been any falls of façade ornaments?

How important?:

- ☐ Yes | ☒ **No** - Have there been deep cracks in the brick walls?  
☐ Yes | ☒ **No** - Have there been deep cracks in the concrete walls?  
☐ Yes | ☒ **No** - Have there been landslides along the banks or slopes?

Importance:

ADDITIONAL COMMENTS:

## Official inquiry for HENNUYERES (BE)

Location: 50.639°N 4.17°E, at 21.3 km from the epicentre.

**Imin: 2 - Imax: 2**

### Did some residents perceive

- ☒ **Yes** | ☐ **No** - Light vibrations?  
☐ **Yes** | ☒ **No** - A characteristic noise: rumbling or rolling?

### Did many residents perceive

- ☐ **Yes** | ☒ **No** - A clear shaking of the building?  
☐ **Yes** | ☒ **No** - A loud rumble?

### Have we witnessed

- ☐ **Yes** | ☒ **No** - The oscillation of chandeliers or freely suspended objects?  
☐ **Yes** | ☒ **No** - Swinging chairs or beds?  
☐ **Yes** | ☒ **No** - Cracking ceilings?  
☐ **Yes** | ☒ **No** - Sleepers waking up?

### Has it been witnessed or later observed

- ☐ **Yes** | ☒ **No** - The shivering of windows and doors?  
☐ **Yes** | ☒ **No** - The shaking of movable objects (tables, vases, knick-knacks, ...)?

### Has it been witnessed or later observed

- ☐ **Yes** | ☒ **No** - The clattering of glasses and dishes in buffets?  
☐ **Yes** | ☒ **No** - The swaying of frames hanging on the wall?  
☐ **Yes** | ☒ **No** - The creaking of floors?  
☐ **Yes** | ☒ **No** - Small fragments of plaster falling from ceilings?  
☐ **Yes** | ☒ **No** - A confusion of the inhabitants (people leaving the house).

### Has it been observed

- ☐ **Yes** | ☒ **No** - Moving knick-knacks?  
☐ **Yes** | ☒ **No** - Moving light objects?  
 Which ones?:  
☐ **Yes** | ☒ **No** - The falling of frames hanging on the wall?  
☐ **Yes** | ☒ **No** - The falling of light objects placed on polished furniture or marble  
☐ **Yes** | ☒ **No** - Cracked or broken windows?  
☐ **Yes** | ☒ **No** - Broken crockery?  
☐ **Yes** | ☒ **No** - Light objects (vases, flower pots, etc.) spilled?  
☐ **Yes** | ☒ **No** - Has light furniture moved?  
☐ **Yes** | ☒ **No** - Has heavy furniture (chests, stoves, ...) vibrated?  
☐ **Yes** | ☒ **No** - Did bells tinkle?  
☐ **Yes** | ☒ **No** - Did heavy furniture move?  
☐ **Yes** | ☒ **No** - Did light furniture tip over?  
☐ **Yes** | ☒ **No** - Have doors been moved on their hinges?

### Has it been observed

- ☐ **Yes** | ☒ **No** - Falling pieces of plaster from the ceilings?  
☐ **Yes** | ☒ **No** - Cracks in wall plaster?  
☐ **Yes** | ☒ **No** - An exceptional fall of a chimney in poor condition?  
☐ **Yes** | ☒ **No** - An exceptional fall of some bricks?  
☐ **Yes** | ☒ **No** - Have there been several damaged chimneys?

How many?:

- ☐ **Yes** | ☒ **No** - Have there been several chimneys overturned?

How many?:

% for the municipality?:

- ☐ **Yes** | ☒ **No** - Have there been any falls of façade ornaments?

How important?:

- ☐ **Yes** | ☒ **No** - Have there been deep cracks in the brick walls?  
☐ **Yes** | ☒ **No** - Have there been deep cracks in the concrete walls?  
☐ **Yes** | ☒ **No** - Have there been landslides along the banks or slopes?

Importance:

ADDITIONAL COMMENTS:

## Official inquiry for HOUDENG-AIMERIES (BE)

Location: 50.483°N 4.151°E, at 4.3 km from the epicentre.

Imin: 5 - Imax: 5

### Did some residents perceive

- ☒ **Yes** | ☐ No - Light vibrations?  
☒ **Yes** | ☐ No - A characteristic noise: rumbling or rolling?

### Did many residents perceive

- ☐ Yes | ☒ **No** - A clear shaking of the building?  
☐ Yes | ☒ **No** - A loud rumble?

### Have we witnessed

- ☒ **Yes** | ☐ No - The oscillation of chandeliers or freely suspended objects?  
☒ **Yes** | ☐ No - Swinging chairs or beds?  
☐ Yes | ☒ **No** - Cracking ceilings?  
☒ **Yes** | ☐ No - Sleepers waking up?

### Has it been witnessed or later observed

- ☒ **Yes** | ☐ No - The shivering of windows and doors?  
☒ **Yes** | ☐ No - The shaking of movable objects (tables, vases, knick-knacks, ...)?

### Has it been witnessed or later observed

- ☒ **Yes** | ☐ No - The clattering of glasses and dishes in buffets?  
☒ **Yes** | ☐ No - The swaying of frames hanging on the wall?  
☐ Yes | ☒ **No** - The creaking of floors?  
☐ Yes | ☒ **No** - Small fragments of plaster falling from ceilings?  
☒ **Yes** | ☐ No - A confusion of the inhabitants (people leaving the house).

### Has it been observed

- ☒ **Yes** | ☐ No - Moving knick-knacks?  
☒ **Yes** | ☐ No - Moving light objects?  
 Which ones?: **vases**  
☐ Yes | ☒ **No** - The falling of frames hanging on the wall?  
☒ **Yes** | ☐ No - The falling of light objects placed on polished furniture or marble  
☐ Yes | ☒ **No** - Cracked or broken windows?  
☒ **Yes** | ☐ No - Broken crockery?  
☒ **Yes** | ☐ No - Light objects (vases, flower pots, etc.) spilled?  
☐ Yes | ☒ **No** - Has light furniture moved?  
☒ **Yes** | ☐ No - Has heavy furniture (chests, stoves, ...) vibrated?  
☐ Yes | ☒ **No** - Did bells tinkle?  
☐ Yes | ☒ **No** - Did heavy furniture move?  
☐ Yes | ☒ **No** - Did light furniture tip over?  
☐ Yes | ☒ **No** - Have doors been moved on their hinges?

### Has it been observed

- ☐ Yes | ☒ **No** - Falling pieces of plaster from the ceilings?  
☒ **Yes** | ☐ No - Cracks in wall plaster?  
☒ **Yes** | ☐ No - An exceptional fall of a chimney in poor condition?  
☒ **Yes** | ☐ No - An exceptional fall of some bricks?  
☒ **Yes** | ☐ No - Have there been several damaged chimneys?

How many?: **20**

- ☒ **Yes** | ☐ No - Have there been several chimneys overturned?

How many?:

% for the municipality?: **10**

- ☐ Yes | ☒ **No** - Have there been any falls of façade ornaments?

How important?:

- ☐ Yes | ☒ **No** - Have there been deep cracks in the brick walls?  
☐ Yes | ☒ **No** - Have there been deep cracks in the concrete walls?  
☐ Yes | ☒ **No** - Have there been landslides along the banks or slopes?

Importance:

ADDITIONAL COMMENTS: **Les mouvements et les vibrations semblent avoir été moins prononcés dans le nord de la commune que dans le sud.**

## Official inquiry for HOUDENG-GOEGNIES (BE)

Location: 50.484°N 4.156°E, at 4.6 km from the epicentre.

Imin: 5 - Imax: 5

### Did some residents perceive

- ☒ **Yes** | ☐ No - Light vibrations?  
☒ **Yes** | ☐ No - A characteristic noise: rumbling or rolling?

### Did many residents perceive

- ☒ **Yes** | ☐ No - A clear shaking of the building?  
☒ **Yes** | ☐ No - A loud rumble?

### Have we witnessed

- ☒ **Yes** | ☐ No - The oscillation of chandeliers or freely suspended objects?  
☒ **Yes** | ☐ No - Swinging chairs or beds?  
☒ **Yes** | ☐ No - Cracking ceilings?  
☒ **Yes** | ☐ No - Sleepers waking up?

### Has it been witnessed or later observed

- ☒ **Yes** | ☐ No - The shivering of windows and doors?  
☒ **Yes** | ☐ No - The shaking of movable objects (tables, vases, knick-knacks, ...)?

### Has it been witnessed or later observed

- ☐ Yes | ☒ **No** - The clattering of glasses and dishes in buffets?  
☐ Yes | ☒ **No** - The swaying of frames hanging on the wall?  
☐ Yes | ☒ **No** - The creaking of floors?  
☐ Yes | ☒ **No** - Small fragments of plaster falling from ceilings?  
☒ **Yes** | ☐ No - A confusion of the inhabitants (people leaving the house).

### Has it been observed

- ☐ Yes | ☒ **No** - Moving knick-knacks?  
☐ Yes | ☒ **No** - Moving light objects?  
 Which ones?:  
☐ Yes | ☒ **No** - The falling of frames hanging on the wall?  
☐ Yes | ☒ **No** - The falling of light objects placed on polished furniture or marble  
☒ **Yes** | ☐ No - Cracked or broken windows?  
☒ **Yes** | ☐ No - Broken crockery?  
☐ Yes | ☒ **No** - Light objects (vases, flower pots, etc.) spilled?  
☐ Yes | ☒ **No** - Has light furniture moved?  
☒ **Yes** | ☐ No - Has heavy furniture (chests, stoves, ...) vibrated?  
☐ Yes | ☒ **No** - Did bells tinkle?  
☐ Yes | ☒ **No** - Did heavy furniture move?  
☐ Yes | ☒ **No** - Did light furniture tip over?  
☐ Yes | ☒ **No** - Have doors been moved on their hinges?

### Has it been observed

- ☐ Yes | ☒ **No** - Falling pieces of plaster from the ceilings?  
☐ Yes | ☒ **No** - Cracks in wall plaster?  
☒ **Yes** | ☐ No - An exceptional fall of a chimney in poor condition?  
☒ **Yes** | ☐ No - An exceptional fall of some bricks?  
☒ **Yes** | ☐ No - Have there been several damaged chimneys?

How many?: **11**

☒ **Yes** | ☐ No - Have there been several chimneys overturned?

How many?: **10**

% for the municipality?: **0,03%**

☐ Yes | ☒ **No** - Have there been any falls of façade ornaments?

How important?:

- ☐ Yes | ☒ **No** - Have there been deep cracks in the brick walls?  
☐ Yes | ☒ **No** - Have there been deep cracks in the concrete walls?  
☐ Yes | ☒ **No** - Have there been landslides along the banks or slopes?

Importance:

ADDITIONAL COMMENTS:

## Official inquiry for HOUTAIN-LE-VAL (BE)

Location: 50.583°N 4.418°E, at 25.8 km from the epicentre.

**Imin: 4 - Imax: 4**

### Did some residents perceive

- ☒ **Yes** | ☐ No - Light vibrations?  
☒ **Yes** | ☐ No - A characteristic noise: rumbling or rolling?

### Did many residents perceive

- ☒ **Yes** | ☐ No - A clear shaking of the building?  
☐ Yes | ☒ **No** - A loud rumble?

### Have we witnessed

- ☒ **Yes** | ☐ No - The oscillation of chandeliers or freely suspended objects?  
☒ **Yes** | ☐ No - Swinging chairs or beds?  
☐ Yes | ☒ **No** - Cracking ceilings?  
☐ Yes | ☒ **No** - Sleepers waking up?

### Has it been witnessed or later observed

- ☒ **Yes** | ☐ No - The shivering of windows and doors?  
☐ Yes | ☒ **No** - The shaking of movable objects (tables, vases, knick-knacks, ...)?

### Has it been witnessed or later observed

- ☐ Yes | ☒ **No** - The clattering of glasses and dishes in buffets?  
☐ Yes | ☒ **No** - The swaying of frames hanging on the wall?  
☐ Yes | ☒ **No** - The creaking of floors?  
☐ Yes | ☒ **No** - Small fragments of plaster falling from ceilings?  
☒ **Yes** | ☐ No - A confusion of the inhabitants (people leaving the house).

### Has it been observed

- ☐ Yes | ☒ **No** - Moving knick-knacks?  
☐ Yes | ☒ **No** - Moving light objects?  
 Which ones?:  
☐ Yes | ☒ **No** - The falling of frames hanging on the wall?  
☐ Yes | ☒ **No** - The falling of light objects placed on polished furniture or marble  
☐ Yes | ☒ **No** - Cracked or broken windows?  
☐ Yes | ☒ **No** - Broken crockery?  
☐ Yes | ☒ **No** - Light objects (vases, flower pots, etc.) spilled?  
☐ Yes | ☒ **No** - Has light furniture moved?  
☐ Yes | ☒ **No** - Has heavy furniture (chests, stoves, ...) vibrated?  
☐ Yes | ☒ **No** - Did bells tinkle?  
☐ Yes | ☒ **No** - Did heavy furniture move?  
☐ Yes | ☒ **No** - Did light furniture tip over?  
☐ Yes | ☒ **No** - Have doors been moved on their hinges?

### Has it been observed

- ☐ Yes | ☒ **No** - Falling pieces of plaster from the ceilings?  
☐ Yes | ☒ **No** - Cracks in wall plaster?  
☐ Yes | ☒ **No** - An exceptional fall of a chimney in poor condition?  
☐ Yes | ☒ **No** - An exceptional fall of some bricks?  
☐ Yes | ☒ **No** - Have there been several damaged chimneys?

How many?:

- ☐ Yes | ☒ **No** - Have there been several chimneys overturned?

How many?:

% for the municipality?:

- ☐ Yes | ☒ **No** - Have there been any falls of façade ornaments?

How important?:

- ☐ Yes | ☒ **No** - Have there been deep cracks in the brick walls?  
☐ Yes | ☒ **No** - Have there been deep cracks in the concrete walls?  
☐ Yes | ☒ **No** - Have there been landslides along the banks or slopes?

Importance:

ADDITIONAL COMMENTS:

## Official inquiry for HOVES (BE)

Location: 50.671°N 4.036°E, at 25.2 km from the epicentre.

**Imin: 3 - Imax: 3**

### Did some residents perceive

- ☒ **Yes** | ☐ No - Light vibrations?  
☐ Yes | ☒ **No** - A characteristic noise: rumbling or rolling?

### Did many residents perceive

- ☐ Yes | ☒ **No** - A clear shaking of the building?  
☐ Yes | ☒ **No** - A loud rumble?

### Have we witnessed

- ☐ Yes | ☒ **No** - The oscillation of chandeliers or freely suspended objects?  
☐ Yes | ☒ **No** - Swinging chairs or beds?  
☐ Yes | ☒ **No** - Cracking ceilings?  
☐ Yes | ☒ **No** - Sleepers waking up?

### Has it been witnessed or later observed

- ☒ **Yes** | ☐ No - The shivering of windows and doors?  
☐ Yes | ☒ **No** - The shaking of movable objects (tables, vases, knick-knacks, ...)?

### Has it been witnessed or later observed

- ☐ Yes | ☒ **No** - The clattering of glasses and dishes in buffets?  
☐ Yes | ☒ **No** - The swaying of frames hanging on the wall?  
☐ Yes | ☒ **No** - The creaking of floors?  
☐ Yes | ☒ **No** - Small fragments of plaster falling from ceilings?  
☐ Yes | ☒ **No** - A confusion of the inhabitants (people leaving the house).

### Has it been observed

- ☐ Yes | ☒ **No** - Moving knick-knacks?  
☐ Yes | ☒ **No** - Moving light objects?  
 Which ones?:  
☐ Yes | ☒ **No** - The falling of frames hanging on the wall?  
☐ Yes | ☒ **No** - The falling of light objects placed on polished furniture or marble  
☐ Yes | ☒ **No** - Cracked or broken windows?  
☐ Yes | ☒ **No** - Broken crockery?  
☐ Yes | ☒ **No** - Light objects (vases, flower pots, etc.) spilled?  
☐ Yes | ☒ **No** - Has light furniture moved?  
☐ Yes | ☒ **No** - Has heavy furniture (chests, stoves, ...) vibrated?  
☐ Yes | ☒ **No** - Did bells tinkle?  
☐ Yes | ☒ **No** - Did heavy furniture move?  
☐ Yes | ☒ **No** - Did light furniture tip over?  
☐ Yes | ☒ **No** - Have doors been moved on their hinges?

### Has it been observed

- ☐ Yes | ☒ **No** - Falling pieces of plaster from the ceilings?  
☐ Yes | ☒ **No** - Cracks in wall plaster?  
☐ Yes | ☒ **No** - An exceptional fall of a chimney in poor condition?  
☐ Yes | ☒ **No** - An exceptional fall of some bricks?  
☐ Yes | ☒ **No** - Have there been several damaged chimneys?

How many?:

- ☐ Yes | ☒ **No** - Have there been several chimneys overturned?

How many?:

% for the municipality?:

- ☐ Yes | ☒ **No** - Have there been any falls of façade ornaments?

How important?:

- ☐ Yes | ☒ **No** - Have there been deep cracks in the brick walls?  
☐ Yes | ☒ **No** - Have there been deep cracks in the concrete walls?  
☐ Yes | ☒ **No** - Have there been landslides along the banks or slopes?

Importance:

ADDITIONAL COMMENTS: **Plusieurs habitants ont comparé ces vibrations à un avion qui aurait passé le mur du son dans le lointain.**

## Official inquiry for HYON (BE)

Location: 50.441°N 3.966°E, at 11.0 km from the epicentre.

**Imin: 4 - Imax: 4**

### Did some residents perceive

- ☒ **Yes** | ☐ No - Light vibrations?  
☐ Yes | ☒ **No** - A characteristic noise: rumbling or rolling?

### Did many residents perceive

- ☒ **Yes** | ☐ No - A clear shaking of the building?  
☐ Yes | ☒ **No** - A loud rumble?

### Have we witnessed

- ☒ **Yes** | ☐ No - The oscillation of chandeliers or freely suspended objects?  
☒ **Yes** | ☐ No - Swinging chairs or beds?  
☐ Yes | ☒ **No** - Cracking ceilings?  
☐ Yes | ☒ **No** - Sleepers waking up?

### Has it been witnessed or later observed

- ☐ Yes | ☒ **No** - The shivering of windows and doors?  
☐ Yes | ☒ **No** - The shaking of movable objects (tables, vases, knick-knacks, ...)?

### Has it been witnessed or later observed

- ☐ Yes | ☒ **No** - The clattering of glasses and dishes in buffets?  
☐ Yes | ☒ **No** - The swaying of frames hanging on the wall?  
☐ Yes | ☒ **No** - The creaking of floors?  
☐ Yes | ☒ **No** - Small fragments of plaster falling from ceilings?  
☐ Yes | ☒ **No** - A confusion of the inhabitants (people leaving the house).

### Has it been observed

- ☐ Yes | ☒ **No** - Moving knick-knacks?  
☐ Yes | ☒ **No** - Moving light objects?  
 Which ones?:  
☐ Yes | ☒ **No** - The falling of frames hanging on the wall?  
☐ Yes | ☒ **No** - The falling of light objects placed on polished furniture or marble  
☐ Yes | ☒ **No** - Cracked or broken windows?  
☐ Yes | ☒ **No** - Broken crockery?  
☐ Yes | ☒ **No** - Light objects (vases, flower pots, etc.) spilled?  
☐ Yes | ☒ **No** - Has light furniture moved?  
☐ Yes | ☒ **No** - Has heavy furniture (chests, stoves, ...) vibrated?  
☐ Yes | ☒ **No** - Did bells tinkle?  
☐ Yes | ☒ **No** - Did heavy furniture move?  
☐ Yes | ☒ **No** - Did light furniture tip over?  
☐ Yes | ☒ **No** - Have doors been moved on their hinges?

### Has it been observed

- ☐ Yes | ☒ **No** - Falling pieces of plaster from the ceilings?  
☐ Yes | ☒ **No** - Cracks in wall plaster?  
☐ Yes | ☒ **No** - An exceptional fall of a chimney in poor condition?  
☐ Yes | ☒ **No** - An exceptional fall of some bricks?  
☐ Yes | ☒ **No** - Have there been several damaged chimneys?

How many?:

- ☐ Yes | ☒ **No** - Have there been several chimneys overturned?

How many?:

% for the municipality?:

- ☐ Yes | ☒ **No** - Have there been any falls of façade ornaments?

How important?:

- ☐ Yes | ☒ **No** - Have there been deep cracks in the brick walls?  
☐ Yes | ☒ **No** - Have there been deep cracks in the concrete walls?  
☐ Yes | ☒ **No** - Have there been landslides along the banks or slopes?

Importance:

ADDITIONAL COMMENTS: **Question 3.- A-t-on observé : l'oscillation de lustres ou d'objets suspendus librement ? l'oscillation de chaises ou de lits ? : on nous a répondu non et oui.**

## Official inquiry for JEMAPPES (BE)

Location: 50.449°N 3.888°E, at 16.5 km from the epicentre.

**Imin: 3 - Imax: 3**

### Did some residents perceive

- ☐ Yes | ☒ **No** - Light vibrations?  
☒ **Yes** | ☐ No - A characteristic noise: rumbling or rolling?

### Did many residents perceive

- ☐ Yes | ☒ **No** - A clear shaking of the building?  
☐ Yes | ☒ **No** - A loud rumble?

### Have we witnessed

- ☐ Yes | ☒ **No** - The oscillation of chandeliers or freely suspended objects?  
☐ Yes | ☒ **No** - Swinging chairs or beds?  
☐ Yes | ☒ **No** - Cracking ceilings?  
☐ Yes | ☒ **No** - Sleepers waking up?

### Has it been witnessed or later observed

- ☒ **Yes** | ☐ No - The shivering of windows and doors?  
☐ Yes | ☒ **No** - The shaking of movable objects (tables, vases, knick-knacks, ...)?

### Has it been witnessed or later observed

- ☐ Yes | ☒ **No** - The clattering of glasses and dishes in buffets?  
☐ Yes | ☒ **No** - The swaying of frames hanging on the wall?  
☐ Yes | ☒ **No** - The creaking of floors?  
☐ Yes | ☒ **No** - Small fragments of plaster falling from ceilings?  
☐ Yes | ☒ **No** - A confusion of the inhabitants (people leaving the house).

### Has it been observed

- ☐ Yes | ☒ **No** - Moving knick-knacks?  
☐ Yes | ☒ **No** - Moving light objects?  
 Which ones?:  
☐ Yes | ☒ **No** - The falling of frames hanging on the wall?  
☐ Yes | ☒ **No** - The falling of light objects placed on polished furniture or marble  
☐ Yes | ☒ **No** - Cracked or broken windows?  
☐ Yes | ☒ **No** - Broken crockery?  
☐ Yes | ☒ **No** - Light objects (vases, flower pots, etc.) spilled?  
☐ Yes | ☒ **No** - Has light furniture moved?  
☐ Yes | ☒ **No** - Has heavy furniture (chests, stoves, ...) vibrated?  
☐ Yes | ☒ **No** - Did bells tinkle?  
☐ Yes | ☒ **No** - Did heavy furniture move?  
☐ Yes | ☒ **No** - Did light furniture tip over?  
☐ Yes | ☒ **No** - Have doors been moved on their hinges?

### Has it been observed

- ☐ Yes | ☒ **No** - Falling pieces of plaster from the ceilings?  
☐ Yes | ☒ **No** - Cracks in wall plaster?  
☐ Yes | ☒ **No** - An exceptional fall of a chimney in poor condition?  
☐ Yes | ☒ **No** - An exceptional fall of some bricks?  
☐ Yes | ☒ **No** - Have there been several damaged chimneys?

How many?:

- ☐ Yes | ☒ **No** - Have there been several chimneys overturned?

How many?:

% for the municipality?:

- ☐ Yes | ☒ **No** - Have there been any falls of façade ornaments?

How important?:

- ☐ Yes | ☒ **No** - Have there been deep cracks in the brick walls?  
☐ Yes | ☒ **No** - Have there been deep cracks in the concrete walls?  
☐ Yes | ☒ **No** - Have there been landslides along the banks or slopes?

Importance:

ADDITIONAL COMMENTS:

## Official inquiry for LA HESTRE (BE)

Location: 50.475°N 4.239°E, at 8.9 km from the epicentre.

**Imin: 4 - Imax: 4**

### Did some residents perceive

- ☒ **Yes** | ☐ No - Light vibrations?  
☒ **Yes** | ☐ No - A characteristic noise: rumbling or rolling?

### Did many residents perceive

- ☒ **Yes** | ☐ No - A clear shaking of the building?  
☒ **Yes** | ☐ No - A loud rumble?

### Have we witnessed

- ☒ **Yes** | ☐ No - The oscillation of chandeliers or freely suspended objects?  
☒ **Yes** | ☐ No - Swinging chairs or beds?  
☐ Yes | ☒ **No** - Cracking ceilings?  
☐ Yes | ☒ **No** - Sleepers waking up?

### Has it been witnessed or later observed

- ☒ **Yes** | ☐ No - The shivering of windows and doors?  
☒ **Yes** | ☐ No - The shaking of movable objects (tables, vases, knick-knacks, ...)?

### Has it been witnessed or later observed

- ☒ **Yes** | ☐ No - The clattering of glasses and dishes in buffets?  
☒ **Yes** | ☐ No - The swaying of frames hanging on the wall?  
☐ Yes | ☒ **No** - The creaking of floors?  
☐ Yes | ☒ **No** - Small fragments of plaster falling from ceilings?  
☒ **Yes** | ☐ No - A confusion of the inhabitants (people leaving the house).

### Has it been observed

- ☐ Yes | ☒ **No** - Moving knick-knacks?  
☐ Yes | ☒ **No** - Moving light objects?  
 Which ones?:  
☐ Yes | ☒ **No** - The falling of frames hanging on the wall?  
☐ Yes | ☒ **No** - The falling of light objects placed on polished furniture or marble  
☐ Yes | ☒ **No** - Cracked or broken windows?  
☐ Yes | ☒ **No** - Broken crockery?  
☐ Yes | ☒ **No** - Light objects (vases, flower pots, etc.) spilled?  
☐ Yes | ☒ **No** - Has light furniture moved?  
☐ Yes | ☒ **No** - Has heavy furniture (chests, stoves, ...) vibrated?  
☐ Yes | ☒ **No** - Did bells tinkle?  
☐ Yes | ☒ **No** - Did heavy furniture move?  
☐ Yes | ☒ **No** - Did light furniture tip over?  
☐ Yes | ☒ **No** - Have doors been moved on their hinges?

### Has it been observed

- ☐ Yes | ☒ **No** - Falling pieces of plaster from the ceilings?  
☐ Yes | ☒ **No** - Cracks in wall plaster?  
☐ Yes | ☒ **No** - An exceptional fall of a chimney in poor condition?  
☐ Yes | ☒ **No** - An exceptional fall of some bricks?  
☐ Yes | ☒ **No** - Have there been several damaged chimneys?

How many?:

- ☐ Yes | ☒ **No** - Have there been several chimneys overturned?

How many?:

% for the municipality?:

- ☐ Yes | ☒ **No** - Have there been any falls of façade ornaments?

How important?:

- ☐ Yes | ☒ **No** - Have there been deep cracks in the brick walls?  
☐ Yes | ☒ **No** - Have there been deep cracks in the concrete walls?  
☐ Yes | ☒ **No** - Have there been landslides along the banks or slopes?

Importance:

ADDITIONAL COMMENTS:

## Official inquiry for LA LOUVIERE (BE)

Location: 50.478°N 4.19°E, at 5.9 km from the epicentre.

Imin: 5 - Imax: 5

### Did some residents perceive

- ☐ Yes | ☒ **No** - Light vibrations?  
☐ Yes | ☒ **No** - A characteristic noise: rumbling or rolling?

### Did many residents perceive

- ☒ **Yes** | ☐ No - A clear shaking of the building?  
☒ **Yes** | ☐ No - A loud rumble?

### Have we witnessed

- ☒ **Yes** | ☐ No - The oscillation of chandeliers or freely suspended objects?  
☒ **Yes** | ☐ No - Swinging chairs or beds?  
☐ Yes | ☒ **No** - Cracking ceilings?  
☐ Yes | ☒ **No** - Sleepers waking up?

### Has it been witnessed or later observed

- ☒ **Yes** | ☐ No - The shivering of windows and doors?  
☒ **Yes** | ☐ No - The shaking of movable objects (tables, vases, knick-knacks, ...)?

### Has it been witnessed or later observed

- ☒ **Yes** | ☐ No - The clattering of glasses and dishes in buffets?  
☒ **Yes** | ☐ No - The swaying of frames hanging on the wall?  
☒ **Yes** | ☐ No - The creaking of floors?  
☒ **Yes** | ☐ No - Small fragments of plaster falling from ceilings?  
☒ **Yes** | ☐ No - A confusion of the inhabitants (people leaving the house).

### Has it been observed

- ☒ **Yes** | ☐ No - Moving knick-knacks?  
☒ **Yes** | ☐ No - Moving light objects?  
 Which ones?: **Bibelots, vases.**  
☒ **Yes** | ☐ No - The falling of frames hanging on the wall?  
☒ **Yes** | ☐ No - The falling of light objects placed on polished furniture or marble  
☐ Yes | ☒ **No** - Cracked or broken windows?  
☒ **Yes** | ☐ No - Broken crockery?  
☒ **Yes** | ☐ No - Light objects (vases, flower pots, etc.) spilled?  
☐ Yes | ☒ **No** - Has light furniture moved?  
☒ **Yes** | ☐ No - Has heavy furniture (chests, stoves, ...) vibrated?  
☐ Yes | ☒ **No** - Did bells tinkle?  
☐ Yes | ☒ **No** - Did heavy furniture move?  
☐ Yes | ☒ **No** - Did light furniture tip over?  
☐ Yes | ☒ **No** - Have doors been moved on their hinges?

### Has it been observed

- ☒ **Yes** | ☐ No - Falling pieces of plaster from the ceilings?  
☐ Yes | ☒ **No** - Cracks in wall plaster?  
☒ **Yes** | ☐ No - An exceptional fall of a chimney in poor condition?  
☒ **Yes** | ☐ No - An exceptional fall of some bricks?  
☒ **Yes** | ☐ No - Have there been several damaged chimneys?

How many?: **3 ou 4**

- ☐ Yes | ☒ **No** - Have there been several chimneys overturned?

How many?:

% for the municipality?:

- ☐ Yes | ☒ **No** - Have there been any falls of façade ornaments?

How important?:

- ☐ Yes | ☒ **No** - Have there been deep cracks in the brick walls?  
☐ Yes | ☒ **No** - Have there been deep cracks in the concrete walls?  
☐ Yes | ☒ **No** - Have there been landslides along the banks or slopes?

Importance:

ADDITIONAL COMMENTS: **Il y a eu plusieurs voitures endommagées par la chute de briques de cheminées.**

## Official inquiry for LABUISSIERE (BE)

Location: 50.315°N 4.186°E, at 15.7 km from the epicentre.

**Imin: 2 - Imax: 2**

### Did some residents perceive

- ☐ Yes | ☒ **No** - Light vibrations?  
☒ **Yes** | ☐ No - A characteristic noise: rumbling or rolling?

### Did many residents perceive

- ☐ Yes | ☒ **No** - A clear shaking of the building?  
☐ Yes | ☒ **No** - A loud rumble?

### Have we witnessed

- ☐ Yes | ☒ **No** - The oscillation of chandeliers or freely suspended objects?  
☐ Yes | ☒ **No** - Swinging chairs or beds?  
☐ Yes | ☒ **No** - Cracking ceilings?  
☐ Yes | ☒ **No** - Sleepers waking up?

### Has it been witnessed or later observed

- ☐ Yes | ☒ **No** - The shivering of windows and doors?  
☐ Yes | ☒ **No** - The shaking of movable objects (tables, vases, knick-knacks, ...)?

### Has it been witnessed or later observed

- ☐ Yes | ☒ **No** - The clattering of glasses and dishes in buffets?  
☐ Yes | ☒ **No** - The swaying of frames hanging on the wall?  
☐ Yes | ☒ **No** - The creaking of floors?  
☐ Yes | ☒ **No** - Small fragments of plaster falling from ceilings?  
☐ Yes | ☒ **No** - A confusion of the inhabitants (people leaving the house).

### Has it been observed

- ☐ Yes | ☒ **No** - Moving knick-knacks?  
☐ Yes | ☒ **No** - Moving light objects?

Which ones?:

- ☐ Yes | ☒ **No** - The falling of frames hanging on the wall?  
☐ Yes | ☒ **No** - The falling of light objects placed on polished furniture or marble  
☐ Yes | ☒ **No** - Cracked or broken windows?  
☐ Yes | ☒ **No** - Broken crockery?  
☐ Yes | ☒ **No** - Light objects (vases, flower pots, etc.) spilled?  
☐ Yes | ☒ **No** - Has light furniture moved?  
☐ Yes | ☒ **No** - Has heavy furniture (chests, stoves, ...) vibrated?  
☐ Yes | ☒ **No** - Did bells tinkle?  
☐ Yes | ☒ **No** - Did heavy furniture move?  
☐ Yes | ☒ **No** - Did light furniture tip over?  
☐ Yes | ☒ **No** - Have doors been moved on their hinges?

### Has it been observed

- ☐ Yes | ☒ **No** - Falling pieces of plaster from the ceilings?  
☐ Yes | ☒ **No** - Cracks in wall plaster?  
☐ Yes | ☒ **No** - An exceptional fall of a chimney in poor condition?  
☐ Yes | ☒ **No** - An exceptional fall of some bricks?  
☐ Yes | ☒ **No** - Have there been several damaged chimneys?

How many?:

- ☐ Yes | ☒ **No** - Have there been several chimneys overturned?

How many?:

% for the municipality?:

- ☐ Yes | ☒ **No** - Have there been any falls of façade ornaments?

How important?:

- ☐ Yes | ☒ **No** - Have there been deep cracks in the brick walls?  
☐ Yes | ☒ **No** - Have there been deep cracks in the concrete walls?  
☐ Yes | ☒ **No** - Have there been landslides along the banks or slopes?

Importance:

ADDITIONAL COMMENTS:

## Official inquiry for LE ROEULX (BE)

Location: 50.503°N 4.109°E, at 5.9 km from the epicentre.

Imin: 5 - Imax: 5

### Did some residents perceive

- ☒ **Yes** | ☐ No - Light vibrations?  
☒ **Yes** | ☐ No - A characteristic noise: rumbling or rolling?

### Did many residents perceive

- ☒ **Yes** | ☐ No - A clear shaking of the building?  
☒ **Yes** | ☐ No - A loud rumble?

### Have we witnessed

- ☒ **Yes** | ☐ No - The oscillation of chandeliers or freely suspended objects?  
☒ **Yes** | ☐ No - Swinging chairs or beds?  
☐ Yes | ☒ **No** - Cracking ceilings?  
☒ **Yes** | ☐ No - Sleepers waking up?

### Has it been witnessed or later observed

- ☒ **Yes** | ☐ No - The shivering of windows and doors?  
☒ **Yes** | ☐ No - The shaking of movable objects (tables, vases, knick-knacks, ...)?

### Has it been witnessed or later observed

- ☒ **Yes** | ☐ No - The clattering of glasses and dishes in buffets?  
☒ **Yes** | ☐ No - The swaying of frames hanging on the wall?  
☐ Yes | ☒ **No** - The creaking of floors?  
☒ **Yes** | ☐ No - Small fragments of plaster falling from ceilings?  
☒ **Yes** | ☐ No - A confusion of the inhabitants (people leaving the house).

### Has it been observed

- ☐ Yes | ☒ **No** - Moving knick-knacks?  
☐ Yes | ☒ **No** - Moving light objects?  
 Which ones?:  
☐ Yes | ☒ **No** - The falling of frames hanging on the wall?  
☐ Yes | ☒ **No** - The falling of light objects placed on polished furniture or marble  
☐ Yes | ☒ **No** - Cracked or broken windows?  
☐ Yes | ☒ **No** - Broken crockery?  
☐ Yes | ☒ **No** - Light objects (vases, flower pots, etc.) spilled?  
☐ Yes | ☒ **No** - Has light furniture moved?  
☐ Yes | ☒ **No** - Has heavy furniture (chests, stoves, ...) vibrated?  
☐ Yes | ☒ **No** - Did bells tinkle?  
☐ Yes | ☒ **No** - Did heavy furniture move?  
☐ Yes | ☒ **No** - Did light furniture tip over?  
☐ Yes | ☒ **No** - Have doors been moved on their hinges?

### Has it been observed

- ☒ **Yes** | ☐ No - Falling pieces of plaster from the ceilings?  
☒ **Yes** | ☐ No - Cracks in wall plaster?  
☒ **Yes** | ☐ No - An exceptional fall of a chimney in poor condition?  
☐ Yes | ☒ **No** - An exceptional fall of some bricks?  
☒ **Yes** | ☐ No - Have there been several damaged chimneys?

How many?: **2**

- ☒ **Yes** | ☐ No - Have there been several chimneys overturned?

How many?:

% for the municipality?: **1**

- ☐ Yes | ☒ **No** - Have there been any falls of façade ornaments?

How important?:

- ☐ Yes | ☒ **No** - Have there been deep cracks in the brick walls?  
☐ Yes | ☒ **No** - Have there been deep cracks in the concrete walls?  
☐ Yes | ☒ **No** - Have there been landslides along the banks or slopes?

Importance:

ADDITIONAL COMMENTS:

## Official inquiry for LEVAL-TRAHEGNIES (BE)

Location: 50.425°N 4.225°E, at 7.9 km from the epicentre.

Imin: 5 - Imax: 5

### Did some residents perceive

- ☐ Yes | ☒ **No** - Light vibrations?  
☒ **Yes** | ☐ No - A characteristic noise: rumbling or rolling?

### Did many residents perceive

- ☒ **Yes** | ☐ No - A clear shaking of the building?  
☐ Yes | ☒ **No** - A loud rumble?

### Have we witnessed

- ☒ **Yes** | ☐ No - The oscillation of chandeliers or freely suspended objects?  
☒ **Yes** | ☐ No - Swinging chairs or beds?  
☐ Yes | ☒ **No** - Cracking ceilings?  
☐ Yes | ☒ **No** - Sleepers waking up?

### Has it been witnessed or later observed

- ☒ **Yes** | ☐ No - The shivering of windows and doors?  
☐ Yes | ☒ **No** - The shaking of movable objects (tables, vases, knick-knacks, ...)?

### Has it been witnessed or later observed

- ☒ **Yes** | ☐ No - The clattering of glasses and dishes in buffets?  
☐ Yes | ☒ **No** - The swaying of frames hanging on the wall?  
☐ Yes | ☒ **No** - The creaking of floors?  
☐ Yes | ☒ **No** - Small fragments of plaster falling from ceilings?  
☒ **Yes** | ☐ No - A confusion of the inhabitants (people leaving the house).

### Has it been observed

- ☐ Yes | ☒ **No** - Moving knick-knacks?  
☐ Yes | ☒ **No** - Moving light objects?  
 Which ones?:  
☐ Yes | ☒ **No** - The falling of frames hanging on the wall?  
☐ Yes | ☒ **No** - The falling of light objects placed on polished furniture or marble  
☐ Yes | ☒ **No** - Cracked or broken windows?  
☐ Yes | ☒ **No** - Broken crockery?  
☐ Yes | ☒ **No** - Light objects (vases, flower pots, etc.) spilled?  
☐ Yes | ☒ **No** - Has light furniture moved?  
☐ Yes | ☒ **No** - Has heavy furniture (chests, stoves, ...) vibrated?  
☐ Yes | ☒ **No** - Did bells tinkle?  
☐ Yes | ☒ **No** - Did heavy furniture move?  
☐ Yes | ☒ **No** - Did light furniture tip over?  
☐ Yes | ☒ **No** - Have doors been moved on their hinges?

### Has it been observed

- ☐ Yes | ☒ **No** - Falling pieces of plaster from the ceilings?  
☐ Yes | ☒ **No** - Cracks in wall plaster?  
☐ Yes | ☒ **No** - An exceptional fall of a chimney in poor condition?  
☐ Yes | ☒ **No** - An exceptional fall of some bricks?  
☐ Yes | ☒ **No** - Have there been several damaged chimneys?

How many?:

- ☐ Yes | ☒ **No** - Have there been several chimneys overturned?

How many?:

% for the municipality?:

- ☐ Yes | ☒ **No** - Have there been any falls of façade ornaments?

How important?:

- ☐ Yes | ☒ **No** - Have there been deep cracks in the brick walls?  
☐ Yes | ☒ **No** - Have there been deep cracks in the concrete walls?  
☐ Yes | ☒ **No** - Have there been landslides along the banks or slopes?

Importance:

ADDITIONAL COMMENTS: **Question 4.- A-t-on observé ou constaté le choc de verres, de vaisselle dans les buffets ? il est répondu : des bouteilles sur les rayons dans un magasin.**

## Official inquiry for LOBBES (BE)

Location: 50.346°N 4.267°E, at 15.6 km from the epicentre.

**Imin: 3 - Imax: 3**

### Did some residents perceive

- ☒ **Yes** | ☐ No - Light vibrations?  
☐ Yes | ☒ **No** - A characteristic noise: rumbling or rolling?

### Did many residents perceive

- ☒ **Yes** | ☐ No - A clear shaking of the building?  
☐ Yes | ☒ **No** - A loud rumble?

### Have we witnessed

- ☐ Yes | ☒ **No** - The oscillation of chandeliers or freely suspended objects?  
☐ Yes | ☒ **No** - Swinging chairs or beds?  
☐ Yes | ☒ **No** - Cracking ceilings?  
☐ Yes | ☒ **No** - Sleepers waking up?

### Has it been witnessed or later observed

- ☐ Yes | ☒ **No** - The shivering of windows and doors?  
☐ Yes | ☒ **No** - The shaking of movable objects (tables, vases, knick-knacks, ...)?

### Has it been witnessed or later observed

- ☐ Yes | ☒ **No** - The clattering of glasses and dishes in buffets?  
☐ Yes | ☒ **No** - The swaying of frames hanging on the wall?  
☐ Yes | ☒ **No** - The creaking of floors?  
☐ Yes | ☒ **No** - Small fragments of plaster falling from ceilings?  
☐ Yes | ☒ **No** - A confusion of the inhabitants (people leaving the house).

### Has it been observed

- ☐ Yes | ☒ **No** - Moving knick-knacks?  
☐ Yes | ☒ **No** - Moving light objects?

Which ones?:

- ☐ Yes | ☒ **No** - The falling of frames hanging on the wall?  
☐ Yes | ☒ **No** - The falling of light objects placed on polished furniture or marble  
☐ Yes | ☒ **No** - Cracked or broken windows?  
☐ Yes | ☒ **No** - Broken crockery?  
☐ Yes | ☒ **No** - Light objects (vases, flower pots, etc.) spilled?  
☐ Yes | ☒ **No** - Has light furniture moved?  
☐ Yes | ☒ **No** - Has heavy furniture (chests, stoves, ...) vibrated?  
☐ Yes | ☒ **No** - Did bells tinkle?  
☐ Yes | ☒ **No** - Did heavy furniture move?  
☐ Yes | ☒ **No** - Did light furniture tip over?  
☐ Yes | ☒ **No** - Have doors been moved on their hinges?

### Has it been observed

- ☐ Yes | ☒ **No** - Falling pieces of plaster from the ceilings?  
☐ Yes | ☒ **No** - Cracks in wall plaster?  
☐ Yes | ☒ **No** - An exceptional fall of a chimney in poor condition?  
☐ Yes | ☒ **No** - An exceptional fall of some bricks?  
☐ Yes | ☒ **No** - Have there been several damaged chimneys?

How many?:

- ☐ Yes | ☒ **No** - Have there been several chimneys overturned?

How many?:

% for the municipality?:

- ☐ Yes | ☒ **No** - Have there been any falls of façade ornaments?

How important?:

- ☐ Yes | ☒ **No** - Have there been deep cracks in the brick walls?  
☐ Yes | ☒ **No** - Have there been deep cracks in the concrete walls?  
☐ Yes | ☒ **No** - Have there been landslides along the banks or slopes?

Importance:

ADDITIONAL COMMENTS: **Aux questions 1 et 2, on nous a répondu oui, dans la partie Nord de la commune.**

## Official inquiry for LOMBISE (BE)

Location: 50.6°N 3.941°E, at 21.0 km from the epicentre.

**Imin: 3 - Imax: 4**

### Did some residents perceive

- ☒ **Yes** | ☐ No - Light vibrations?  
☐ Yes | ☒ **No** - A characteristic noise: rumbling or rolling?

### Did many residents perceive

- ☐ Yes | ☒ **No** - A clear shaking of the building?  
☐ Yes | ☒ **No** - A loud rumble?

### Have we witnessed

- ☒ **Yes** | ☐ No - The oscillation of chandeliers or freely suspended objects?  
☐ Yes | ☒ **No** - Swinging chairs or beds?  
☐ Yes | ☒ **No** - Cracking ceilings?  
☐ Yes | ☒ **No** - Sleepers waking up?

### Has it been witnessed or later observed

- ☒ **Yes** | ☐ No - The shivering of windows and doors?  
☒ **Yes** | ☐ No - The shaking of movable objects (tables, vases, knick-knacks, ...)?

### Has it been witnessed or later observed

- ☐ Yes | ☒ **No** - The clattering of glasses and dishes in buffets?  
☒ **Yes** | ☐ No - The swaying of frames hanging on the wall?  
☐ Yes | ☒ **No** - The creaking of floors?  
☐ Yes | ☒ **No** - Small fragments of plaster falling from ceilings?  
☐ Yes | ☒ **No** - A confusion of the inhabitants (people leaving the house).

### Has it been observed

- ☐ Yes | ☒ **No** - Moving knick-knacks?  
☐ Yes | ☒ **No** - Moving light objects?  
 Which ones?:  
☐ Yes | ☒ **No** - The falling of frames hanging on the wall?  
☐ Yes | ☒ **No** - The falling of light objects placed on polished furniture or marble  
☐ Yes | ☒ **No** - Cracked or broken windows?  
☐ Yes | ☒ **No** - Broken crockery?  
☐ Yes | ☒ **No** - Light objects (vases, flower pots, etc.) spilled?  
☐ Yes | ☒ **No** - Has light furniture moved?  
☐ Yes | ☒ **No** - Has heavy furniture (chests, stoves, ...) vibrated?  
☐ Yes | ☒ **No** - Did bells tinkle?  
☐ Yes | ☒ **No** - Did heavy furniture move?  
☐ Yes | ☒ **No** - Did light furniture tip over?  
☐ Yes | ☒ **No** - Have doors been moved on their hinges?

### Has it been observed

- ☐ Yes | ☒ **No** - Falling pieces of plaster from the ceilings?  
☐ Yes | ☒ **No** - Cracks in wall plaster?  
☐ Yes | ☒ **No** - An exceptional fall of a chimney in poor condition?  
☐ Yes | ☒ **No** - An exceptional fall of some bricks?  
☐ Yes | ☒ **No** - Have there been several damaged chimneys?

How many?:

- ☐ Yes | ☒ **No** - Have there been several chimneys overturned?

How many?:

% for the municipality?:

- ☐ Yes | ☒ **No** - Have there been any falls of façade ornaments?

How important?:

- ☐ Yes | ☒ **No** - Have there been deep cracks in the brick walls?  
☐ Yes | ☒ **No** - Have there been deep cracks in the concrete walls?  
☐ Yes | ☒ **No** - Have there been landslides along the banks or slopes?

Importance:

ADDITIONAL COMMENTS:

## Official inquiry for LOUPOIGNE (BE)

Location: 50.598°N 4.444°E, at 28.2 km from the epicentre.

**Imin: 2 - Imax: 2**

### Did some residents perceive

☒ **Yes** | ☐ **No** - Light vibrations?

☒ **Yes** | ☐ **No** - A characteristic noise: rumbling or rolling?

### Did many residents perceive

☐ **Yes** | ☒ **No** - A clear shaking of the building?

☐ **Yes** | ☒ **No** - A loud rumble?

### Have we witnessed

☐ **Yes** | ☒ **No** - The oscillation of chandeliers or freely suspended objects?

☐ **Yes** | ☒ **No** - Swinging chairs or beds?

☐ **Yes** | ☒ **No** - Cracking ceilings?

☐ **Yes** | ☒ **No** - Sleepers waking up?

### Has it been witnessed or later observed

☐ **Yes** | ☒ **No** - The shivering of windows and doors?

☐ **Yes** | ☒ **No** - The shaking of movable objects (tables, vases, knick-knacks, ...)?

### Has it been witnessed or later observed

☐ **Yes** | ☒ **No** - The clattering of glasses and dishes in buffets?

☐ **Yes** | ☒ **No** - The swaying of frames hanging on the wall?

☐ **Yes** | ☒ **No** - The creaking of floors?

☐ **Yes** | ☒ **No** - Small fragments of plaster falling from ceilings?

☐ **Yes** | ☒ **No** - A confusion of the inhabitants (people leaving the house).

### Has it been observed

☐ **Yes** | ☒ **No** - Moving knick-knacks?

☐ **Yes** | ☒ **No** - Moving light objects?

Which ones?:

☐ **Yes** | ☒ **No** - The falling of frames hanging on the wall?

☐ **Yes** | ☒ **No** - The falling of light objects placed on polished furniture or marble

☐ **Yes** | ☒ **No** - Cracked or broken windows?

☐ **Yes** | ☒ **No** - Broken crockery?

☐ **Yes** | ☒ **No** - Light objects (vases, flower pots, etc.) spilled?

☐ **Yes** | ☒ **No** - Has light furniture moved?

☐ **Yes** | ☒ **No** - Has heavy furniture (chests, stoves, ...) vibrated?

☐ **Yes** | ☒ **No** - Did bells tinkle?

☐ **Yes** | ☒ **No** - Did heavy furniture move?

☐ **Yes** | ☒ **No** - Did light furniture tip over?

☐ **Yes** | ☒ **No** - Have doors been moved on their hinges?

### Has it been observed

☐ **Yes** | ☒ **No** - Falling pieces of plaster from the ceilings?

☐ **Yes** | ☒ **No** - Cracks in wall plaster?

☐ **Yes** | ☒ **No** - An exceptional fall of a chimney in poor condition?

☐ **Yes** | ☒ **No** - An exceptional fall of some bricks?

☐ **Yes** | ☒ **No** - Have there been several damaged chimneys?

How many?:

☐ **Yes** | ☒ **No** - Have there been several chimneys overturned?

How many?:

% for the municipality?:

☐ **Yes** | ☒ **No** - Have there been any falls of façade ornaments?

How important?:

☐ **Yes** | ☒ **No** - Have there been deep cracks in the brick walls?

☐ **Yes** | ☒ **No** - Have there been deep cracks in the concrete walls?

☐ **Yes** | ☒ **No** - Have there been landslides along the banks or slopes?

Importance:

ADDITIONAL COMMENTS:

## Official inquiry for MARCHE-LEZ-ECAUSSINNES (BE)

Location: 50.546°N 4.183°E, at 11.6 km from the epicentre.

**Imin: 3 - Imax: 3**

### Did some residents perceive

- ☒ **Yes** | ☐ **No** - Light vibrations?  
☐ **Yes** | ☒ **No** - A characteristic noise: rumbling or rolling?

### Did many residents perceive

- ☐ **Yes** | ☒ **No** - A clear shaking of the building?  
☐ **Yes** | ☒ **No** - A loud rumble?

### Have we witnessed

- ☐ **Yes** | ☒ **No** - The oscillation of chandeliers or freely suspended objects?  
☐ **Yes** | ☒ **No** - Swinging chairs or beds?  
☐ **Yes** | ☒ **No** - Cracking ceilings?  
☐ **Yes** | ☒ **No** - Sleepers waking up?

### Has it been witnessed or later observed

- ☐ **Yes** | ☒ **No** - The shivering of windows and doors?  
☒ **Yes** | ☐ **No** - The shaking of movable objects (tables, vases, knick-knacks, ...)?

### Has it been witnessed or later observed

- ☐ **Yes** | ☒ **No** - The clattering of glasses and dishes in buffets?  
☐ **Yes** | ☒ **No** - The swaying of frames hanging on the wall?  
☐ **Yes** | ☒ **No** - The creaking of floors?  
☐ **Yes** | ☒ **No** - Small fragments of plaster falling from ceilings?  
☐ **Yes** | ☒ **No** - A confusion of the inhabitants (people leaving the house).

### Has it been observed

- ☐ **Yes** | ☒ **No** - Moving knick-knacks?  
☐ **Yes** | ☒ **No** - Moving light objects?  
 Which ones?:  
☐ **Yes** | ☒ **No** - The falling of frames hanging on the wall?  
☐ **Yes** | ☒ **No** - The falling of light objects placed on polished furniture or marble  
☐ **Yes** | ☒ **No** - Cracked or broken windows?  
☐ **Yes** | ☒ **No** - Broken crockery?  
☐ **Yes** | ☒ **No** - Light objects (vases, flower pots, etc.) spilled?  
☐ **Yes** | ☒ **No** - Has light furniture moved?  
☐ **Yes** | ☒ **No** - Has heavy furniture (chests, stoves, ...) vibrated?  
☐ **Yes** | ☒ **No** - Did bells tinkle?  
☐ **Yes** | ☒ **No** - Did heavy furniture move?  
☐ **Yes** | ☒ **No** - Did light furniture tip over?  
☐ **Yes** | ☒ **No** - Have doors been moved on their hinges?

### Has it been observed

- ☐ **Yes** | ☒ **No** - Falling pieces of plaster from the ceilings?  
☐ **Yes** | ☒ **No** - Cracks in wall plaster?  
☐ **Yes** | ☒ **No** - An exceptional fall of a chimney in poor condition?  
☐ **Yes** | ☒ **No** - An exceptional fall of some bricks?  
☐ **Yes** | ☒ **No** - Have there been several damaged chimneys?

How many?:

- ☐ **Yes** | ☒ **No** - Have there been several chimneys overturned?

How many?:

% for the municipality?:

- ☐ **Yes** | ☒ **No** - Have there been any falls of façade ornaments?

How important?:

- ☐ **Yes** | ☒ **No** - Have there been deep cracks in the brick walls?  
☐ **Yes** | ☒ **No** - Have there been deep cracks in the concrete walls?  
☐ **Yes** | ☒ **No** - Have there been landslides along the banks or slopes?

Importance:

ADDITIONAL COMMENTS:

## Official inquiry for MARCQ (BE)

Location: 50.692°N 4.019°E, at 27.9 km from the epicentre.

**Imin: 3 - Imax: 3**

### Did some residents perceive

- ☒ **Yes** | ☐ No - Light vibrations?  
☐ Yes | ☒ **No** - A characteristic noise: rumbling or rolling?

### Did many residents perceive

- ☐ Yes | ☒ **No** - A clear shaking of the building?  
☐ Yes | ☒ **No** - A loud rumble?

### Have we witnessed

- ☒ **Yes** | ☐ No - The oscillation of chandeliers or freely suspended objects?  
☒ **Yes** | ☐ No - Swinging chairs or beds?  
☐ Yes | ☒ **No** - Cracking ceilings?  
☐ Yes | ☒ **No** - Sleepers waking up?

### Has it been witnessed or later observed

- ☒ **Yes** | ☐ No - The shivering of windows and doors?  
☒ **Yes** | ☐ No - The shaking of movable objects (tables, vases, knick-knacks, ...)?

### Has it been witnessed or later observed

- ☐ Yes | ☒ **No** - The clattering of glasses and dishes in buffets?  
☐ Yes | ☒ **No** - The swaying of frames hanging on the wall?  
☐ Yes | ☒ **No** - The creaking of floors?  
☐ Yes | ☒ **No** - Small fragments of plaster falling from ceilings?  
☐ Yes | ☒ **No** - A confusion of the inhabitants (people leaving the house).

### Has it been observed

- ☐ Yes | ☒ **No** - Moving knick-knacks?  
☐ Yes | ☒ **No** - Moving light objects?  
 Which ones?:  
☐ Yes | ☒ **No** - The falling of frames hanging on the wall?  
☐ Yes | ☒ **No** - The falling of light objects placed on polished furniture or marble  
☐ Yes | ☒ **No** - Cracked or broken windows?  
☐ Yes | ☒ **No** - Broken crockery?  
☐ Yes | ☒ **No** - Light objects (vases, flower pots, etc.) spilled?  
☐ Yes | ☒ **No** - Has light furniture moved?  
☐ Yes | ☒ **No** - Has heavy furniture (chests, stoves, ...) vibrated?  
☐ Yes | ☒ **No** - Did bells tinkle?  
☐ Yes | ☒ **No** - Did heavy furniture move?  
☐ Yes | ☒ **No** - Did light furniture tip over?  
☐ Yes | ☒ **No** - Have doors been moved on their hinges?

### Has it been observed

- ☐ Yes | ☒ **No** - Falling pieces of plaster from the ceilings?  
☐ Yes | ☒ **No** - Cracks in wall plaster?  
☐ Yes | ☒ **No** - An exceptional fall of a chimney in poor condition?  
☐ Yes | ☒ **No** - An exceptional fall of some bricks?  
☐ Yes | ☒ **No** - Have there been several damaged chimneys?

How many?:

- ☐ Yes | ☒ **No** - Have there been several chimneys overturned?

How many?:

% for the municipality?:

- ☐ Yes | ☒ **No** - Have there been any falls of façade ornaments?

How important?:

- ☐ Yes | ☒ **No** - Have there been deep cracks in the brick walls?  
☐ Yes | ☒ **No** - Have there been deep cracks in the concrete walls?  
☐ Yes | ☒ **No** - Have there been landslides along the banks or slopes?

Importance:

ADDITIONAL COMMENTS:

## Official inquiry for MAURAGE (BE)

Location: 50.456°N 4.102°E, at 1.4 km from the epicentre.

**Imin: 6 - Imax: 6**

### Did some residents perceive

- ☐ Yes | ☒ **No** - Light vibrations?  
☐ Yes | ☒ **No** - A characteristic noise: rumbling or rolling?

### Did many residents perceive

- ☒ **Yes** | ☐ No - A clear shaking of the building?  
☒ **Yes** | ☐ No - A loud rumble?

### Have we witnessed

- ☒ **Yes** | ☐ No - The oscillation of chandeliers or freely suspended objects?  
☒ **Yes** | ☐ No - Swinging chairs or beds?  
☒ **Yes** | ☐ No - Cracking ceilings?  
☒ **Yes** | ☐ No - Sleepers waking up?

### Has it been witnessed or later observed

- ☒ **Yes** | ☐ No - The shivering of windows and doors?  
☒ **Yes** | ☐ No - The shaking of movable objects (tables, vases, knick-knacks, ...)?

### Has it been witnessed or later observed

- ☒ **Yes** | ☐ No - The clattering of glasses and dishes in buffets?  
☒ **Yes** | ☐ No - The swaying of frames hanging on the wall?  
☒ **Yes** | ☐ No - The creaking of floors?  
☒ **Yes** | ☐ No - Small fragments of plaster falling from ceilings?  
☒ **Yes** | ☐ No - A confusion of the inhabitants (people leaving the house).

### Has it been observed

- ☒ **Yes** | ☐ No - Moving knick-knacks?  
☒ **Yes** | ☐ No - Moving light objects?  
 Which ones?: **verres et bouteilles**  
☐ Yes | ☒ **No** - The falling of frames hanging on the wall?  
☒ **Yes** | ☐ No - The falling of light objects placed on polished furniture or marble  
☒ **Yes** | ☐ No - Cracked or broken windows?  
☒ **Yes** | ☐ No - Broken crockery?  
☒ **Yes** | ☐ No - Light objects (vases, flower pots, etc.) spilled?  
☒ **Yes** | ☐ No - Has light furniture moved?  
☒ **Yes** | ☐ No - Has heavy furniture (chests, stoves, ...) vibrated?  
☐ Yes | ☒ **No** - Did bells tinkle?  
☐ Yes | ☒ **No** - Did heavy furniture move?  
☒ **Yes** | ☐ No - Did light furniture tip over?  
☐ Yes | ☒ **No** - Have doors been moved on their hinges?

### Has it been observed

- ☒ **Yes** | ☐ No - Falling pieces of plaster from the ceilings?  
☒ **Yes** | ☐ No - Cracks in wall plaster?  
☐ Yes | ☒ **No** - An exceptional fall of a chimney in poor condition?  
☒ **Yes** | ☐ No - An exceptional fall of some bricks?  
☒ **Yes** | ☐ No - Have there been several damaged chimneys?

How many?: **une trentaine**

- ☒ **Yes** | ☐ No - Have there been several chimneys overturned?

How many?:

% for the municipality?: **1/2%**

- ☐ Yes | ☒ **No** - Have there been any falls of façade ornaments?

How important?:

- ☒ **Yes** | ☐ No - Have there been deep cracks in the brick walls?  
☒ **Yes** | ☐ No - Have there been deep cracks in the concrete walls?  
☐ Yes | ☒ **No** - Have there been landslides along the banks or slopes?

Importance:

ADDITIONAL COMMENTS:

## Official inquiry for MERBES-SAINT-MARIE (BE)

Location: 50.355°N 4.172°E, at 11.2 km from the epicentre.

**Imin: 2 - Imax: 2**

### Did some residents perceive

- ☒ **Yes** | ☐ No - Light vibrations?  
☐ Yes | ☒ **No** - A characteristic noise: rumbling or rolling?

### Did many residents perceive

- ☐ Yes | ☒ **No** - A clear shaking of the building?  
☐ Yes | ☒ **No** - A loud rumble?

### Have we witnessed

- ☐ Yes | ☒ **No** - The oscillation of chandeliers or freely suspended objects?  
☒ **Yes** | ☐ No - Swinging chairs or beds?  
☐ Yes | ☒ **No** - Cracking ceilings?  
☐ Yes | ☒ **No** - Sleepers waking up?

### Has it been witnessed or later observed

- ☐ Yes | ☒ **No** - The shivering of windows and doors?  
☐ Yes | ☒ **No** - The shaking of movable objects (tables, vases, knick-knacks, ...)?

### Has it been witnessed or later observed

- ☐ Yes | ☒ **No** - The clattering of glasses and dishes in buffets?  
☐ Yes | ☒ **No** - The swaying of frames hanging on the wall?  
☐ Yes | ☒ **No** - The creaking of floors?  
☐ Yes | ☒ **No** - Small fragments of plaster falling from ceilings?  
☐ Yes | ☒ **No** - A confusion of the inhabitants (people leaving the house).

### Has it been observed

- ☐ Yes | ☒ **No** - Moving knick-knacks?  
☐ Yes | ☒ **No** - Moving light objects?  
 Which ones?:  
☐ Yes | ☒ **No** - The falling of frames hanging on the wall?  
☐ Yes | ☒ **No** - The falling of light objects placed on polished furniture or marble  
☐ Yes | ☒ **No** - Cracked or broken windows?  
☐ Yes | ☒ **No** - Broken crockery?  
☐ Yes | ☒ **No** - Light objects (vases, flower pots, etc.) spilled?  
☐ Yes | ☒ **No** - Has light furniture moved?  
☐ Yes | ☒ **No** - Has heavy furniture (chests, stoves, ...) vibrated?  
☐ Yes | ☒ **No** - Did bells tinkle?  
☐ Yes | ☒ **No** - Did heavy furniture move?  
☐ Yes | ☒ **No** - Did light furniture tip over?  
☐ Yes | ☒ **No** - Have doors been moved on their hinges?

### Has it been observed

- ☐ Yes | ☒ **No** - Falling pieces of plaster from the ceilings?  
☐ Yes | ☒ **No** - Cracks in wall plaster?  
☐ Yes | ☒ **No** - An exceptional fall of a chimney in poor condition?  
☐ Yes | ☒ **No** - An exceptional fall of some bricks?  
☐ Yes | ☒ **No** - Have there been several damaged chimneys?

How many?:

- ☐ Yes | ☒ **No** - Have there been several chimneys overturned?

How many?:

% for the municipality?:

- ☐ Yes | ☒ **No** - Have there been any falls of façade ornaments?

How important?:

- ☐ Yes | ☒ **No** - Have there been deep cracks in the brick walls?  
☐ Yes | ☒ **No** - Have there been deep cracks in the concrete walls?  
☐ Yes | ☒ **No** - Have there been landslides along the banks or slopes?

Importance:

ADDITIONAL COMMENTS:

## Official inquiry for MESVIN (BE)

Location: 50.427°N 3.961°E, at 11.6 km from the epicentre.

**Imin: 4 - Imax: 4**

### Did some residents perceive

- ☐ Yes | ☒ **No** - Light vibrations?  
☐ Yes | ☒ **No** - A characteristic noise: rumbling or rolling?

### Did many residents perceive

- ☒ **Yes** | ☐ No - A clear shaking of the building?  
☐ Yes | ☒ **No** - A loud rumble?

### Have we witnessed

- ☒ **Yes** | ☐ No - The oscillation of chandeliers or freely suspended objects?  
☒ **Yes** | ☐ No - Swinging chairs or beds?  
☐ Yes | ☒ **No** - Cracking ceilings?  
☐ Yes | ☒ **No** - Sleepers waking up?

### Has it been witnessed or later observed

- ☒ **Yes** | ☐ No - The shivering of windows and doors?  
☒ **Yes** | ☐ No - The shaking of movable objects (tables, vases, knick-knacks, ...)?

### Has it been witnessed or later observed

- ☐ Yes | ☒ **No** - The clattering of glasses and dishes in buffets?  
☒ **Yes** | ☐ No - The swaying of frames hanging on the wall?  
☐ Yes | ☒ **No** - The creaking of floors?  
☐ Yes | ☒ **No** - Small fragments of plaster falling from ceilings?  
☐ Yes | ☒ **No** - A confusion of the inhabitants (people leaving the house).

### Has it been observed

- ☐ Yes | ☒ **No** - Moving knick-knacks?  
☐ Yes | ☒ **No** - Moving light objects?  
 Which ones?:  
☐ Yes | ☒ **No** - The falling of frames hanging on the wall?  
☐ Yes | ☒ **No** - The falling of light objects placed on polished furniture or marble  
☐ Yes | ☒ **No** - Cracked or broken windows?  
☐ Yes | ☒ **No** - Broken crockery?  
☐ Yes | ☒ **No** - Light objects (vases, flower pots, etc.) spilled?  
☐ Yes | ☒ **No** - Has light furniture moved?  
☐ Yes | ☒ **No** - Has heavy furniture (chests, stoves, ...) vibrated?  
☐ Yes | ☒ **No** - Did bells tinkle?  
☐ Yes | ☒ **No** - Did heavy furniture move?  
☐ Yes | ☒ **No** - Did light furniture tip over?  
☐ Yes | ☒ **No** - Have doors been moved on their hinges?

### Has it been observed

- ☐ Yes | ☒ **No** - Falling pieces of plaster from the ceilings?  
☐ Yes | ☒ **No** - Cracks in wall plaster?  
☐ Yes | ☒ **No** - An exceptional fall of a chimney in poor condition?  
☐ Yes | ☒ **No** - An exceptional fall of some bricks?  
☐ Yes | ☒ **No** - Have there been several damaged chimneys?

How many?:

- ☐ Yes | ☒ **No** - Have there been several chimneys overturned?

How many?:

% for the municipality?:

- ☐ Yes | ☒ **No** - Have there been any falls of façade ornaments?

How important?:

- ☐ Yes | ☒ **No** - Have there been deep cracks in the brick walls?  
☐ Yes | ☒ **No** - Have there been deep cracks in the concrete walls?  
☐ Yes | ☒ **No** - Have there been landslides along the banks or slopes?

Importance:

ADDITIONAL COMMENTS:

## Official inquiry for MIGNAULT (BE)

Location: 50.529°N 4.154°E, at 9.1 km from the epicentre.

**Imin: 4 - Imax: 4**

### Did some residents perceive

- ☒ **Yes** | ☐ No - Light vibrations?  
☒ **Yes** | ☐ No - A characteristic noise: rumbling or rolling?

### Did many residents perceive

- ☐ Yes | ☒ **No** - A clear shaking of the building?  
☒ **Yes** | ☐ No - A loud rumble?

### Have we witnessed

- ☒ **Yes** | ☐ No - The oscillation of chandeliers or freely suspended objects?  
☐ Yes | ☒ **No** - Swinging chairs or beds?  
☐ Yes | ☒ **No** - Cracking ceilings?  
☐ Yes | ☒ **No** - Sleepers waking up?

### Has it been witnessed or later observed

- ☒ **Yes** | ☐ No - The shivering of windows and doors?  
☒ **Yes** | ☐ No - The shaking of movable objects (tables, vases, knick-knacks, ...)?

### Has it been witnessed or later observed

- ☐ Yes | ☒ **No** - The clattering of glasses and dishes in buffets?  
☐ Yes | ☒ **No** - The swaying of frames hanging on the wall?  
☐ Yes | ☒ **No** - The creaking of floors?  
☐ Yes | ☒ **No** - Small fragments of plaster falling from ceilings?  
☐ Yes | ☒ **No** - A confusion of the inhabitants (people leaving the house).

### Has it been observed

- ☒ **Yes** | ☐ No - Moving knick-knacks?  
☐ Yes | ☒ **No** - Moving light objects?

Which ones?:

- ☐ Yes | ☒ **No** - The falling of frames hanging on the wall?  
☐ Yes | ☒ **No** - The falling of light objects placed on polished furniture or marble  
☐ Yes | ☒ **No** - Cracked or broken windows?  
☐ Yes | ☒ **No** - Broken crockery?  
☐ Yes | ☒ **No** - Light objects (vases, flower pots, etc.) spilled?  
☐ Yes | ☒ **No** - Has light furniture moved?  
☐ Yes | ☒ **No** - Has heavy furniture (chests, stoves, ...) vibrated?  
☐ Yes | ☒ **No** - Did bells tinkle?  
☐ Yes | ☒ **No** - Did heavy furniture move?  
☐ Yes | ☒ **No** - Did light furniture tip over?  
☐ Yes | ☒ **No** - Have doors been moved on their hinges?

### Has it been observed

- ☐ Yes | ☒ **No** - Falling pieces of plaster from the ceilings?  
☐ Yes | ☒ **No** - Cracks in wall plaster?  
☐ Yes | ☒ **No** - An exceptional fall of a chimney in poor condition?  
☐ Yes | ☒ **No** - An exceptional fall of some bricks?  
☐ Yes | ☒ **No** - Have there been several damaged chimneys?

How many?:

- ☐ Yes | ☒ **No** - Have there been several chimneys overturned?

How many?:

% for the municipality?:

- ☐ Yes | ☒ **No** - Have there been any falls of façade ornaments?

How important?:

- ☐ Yes | ☒ **No** - Have there been deep cracks in the brick walls?  
☐ Yes | ☒ **No** - Have there been deep cracks in the concrete walls?  
☐ Yes | ☒ **No** - Have there been landslides along the banks or slopes?

Importance:

ADDITIONAL COMMENTS:

## Official inquiry for MONS (BE)

Location: 50.455°N 3.948°E, at 12.2 km from the epicentre.

**Imin: 4 - Imax: 4**

### Did some residents perceive

- ☒ **Yes** | ☐ No - Light vibrations?  
☒ **Yes** | ☐ No - A characteristic noise: rumbling or rolling?

### Did many residents perceive

- ☒ **Yes** | ☐ No - A clear shaking of the building?  
☐ Yes | ☒ **No** - A loud rumble?

### Have we witnessed

- ☒ **Yes** | ☐ No - The oscillation of chandeliers or freely suspended objects?  
☒ **Yes** | ☐ No - Swinging chairs or beds?  
☐ Yes | ☒ **No** - Cracking ceilings?  
☒ **Yes** | ☐ No - Sleepers waking up?

### Has it been witnessed or later observed

- ☒ **Yes** | ☐ No - The shivering of windows and doors?  
☒ **Yes** | ☐ No - The shaking of movable objects (tables, vases, knick-knacks, ...)?

### Has it been witnessed or later observed

- ☒ **Yes** | ☐ No - The clattering of glasses and dishes in buffets?  
☒ **Yes** | ☐ No - The swaying of frames hanging on the wall?  
☐ Yes | ☒ **No** - The creaking of floors?  
☐ Yes | ☒ **No** - Small fragments of plaster falling from ceilings?  
☒ **Yes** | ☐ No - A confusion of the inhabitants (people leaving the house).

### Has it been observed

- ☒ **Yes** | ☐ No - Moving knick-knacks?  
☒ **Yes** | ☐ No - Moving light objects?  
 Which ones?: **Télévision sur table roulante.**  
☐ Yes | ☒ **No** - The falling of frames hanging on the wall?  
☐ Yes | ☒ **No** - The falling of light objects placed on polished furniture or marble  
☐ Yes | ☒ **No** - Cracked or broken windows?  
☐ Yes | ☒ **No** - Broken crockery?  
☐ Yes | ☒ **No** - Light objects (vases, flower pots, etc.) spilled?  
☐ Yes | ☒ **No** - Has light furniture moved?  
☐ Yes | ☒ **No** - Has heavy furniture (chests, stoves, ...) vibrated?  
☐ Yes | ☒ **No** - Did bells tinkle?  
☐ Yes | ☒ **No** - Did heavy furniture move?  
☐ Yes | ☒ **No** - Did light furniture tip over?  
☐ Yes | ☒ **No** - Have doors been moved on their hinges?

### Has it been observed

- ☐ Yes | ☒ **No** - Falling pieces of plaster from the ceilings?  
☐ Yes | ☒ **No** - Cracks in wall plaster?  
☐ Yes | ☒ **No** - An exceptional fall of a chimney in poor condition?  
☐ Yes | ☒ **No** - An exceptional fall of some bricks?  
☐ Yes | ☒ **No** - Have there been several damaged chimneys?

How many?:

- ☐ Yes | ☒ **No** - Have there been several chimneys overturned?

How many?:

% for the municipality?:

- ☐ Yes | ☒ **No** - Have there been any falls of façade ornaments?

How important?:

- ☐ Yes | ☒ **No** - Have there been deep cracks in the brick walls?  
☐ Yes | ☒ **No** - Have there been deep cracks in the concrete walls?  
☐ Yes | ☒ **No** - Have there been landslides along the banks or slopes?

Importance:

ADDITIONAL COMMENTS:

## Official inquiry for MONT-SAINT-GUIBERT (BE)

Location: 50.635°N 4.612°E, at 40.5 km from the epicentre.

**Imin: 3 - Imax: 3**

### Did some residents perceive

- ☒ **Yes** | ☐ No - Light vibrations?  
☒ **Yes** | ☐ No - A characteristic noise: rumbling or rolling?

### Did many residents perceive

- ☐ Yes | ☒ **No** - A clear shaking of the building?  
☐ Yes | ☒ **No** - A loud rumble?

### Have we witnessed

- ☒ **Yes** | ☐ No - The oscillation of chandeliers or freely suspended objects?  
☐ Yes | ☒ **No** - Swinging chairs or beds?  
☐ Yes | ☒ **No** - Cracking ceilings?  
☐ Yes | ☒ **No** - Sleepers waking up?

### Has it been witnessed or later observed

- ☐ Yes | ☒ **No** - The shivering of windows and doors?  
☐ Yes | ☒ **No** - The shaking of movable objects (tables, vases, knick-knacks, ...)?

### Has it been witnessed or later observed

- ☐ Yes | ☒ **No** - The clattering of glasses and dishes in buffets?  
☐ Yes | ☒ **No** - The swaying of frames hanging on the wall?  
☐ Yes | ☒ **No** - The creaking of floors?  
☐ Yes | ☒ **No** - Small fragments of plaster falling from ceilings?  
☐ Yes | ☒ **No** - A confusion of the inhabitants (people leaving the house).

### Has it been observed

- ☐ Yes | ☒ **No** - Moving knick-knacks?  
☐ Yes | ☒ **No** - Moving light objects?  
 Which ones?:  
☐ Yes | ☒ **No** - The falling of frames hanging on the wall?  
☐ Yes | ☒ **No** - The falling of light objects placed on polished furniture or marble  
☐ Yes | ☒ **No** - Cracked or broken windows?  
☐ Yes | ☒ **No** - Broken crockery?  
☐ Yes | ☒ **No** - Light objects (vases, flower pots, etc.) spilled?  
☐ Yes | ☒ **No** - Has light furniture moved?  
☐ Yes | ☒ **No** - Has heavy furniture (chests, stoves, ...) vibrated?  
☐ Yes | ☒ **No** - Did bells tinkle?  
☐ Yes | ☒ **No** - Did heavy furniture move?  
☐ Yes | ☒ **No** - Did light furniture tip over?  
☐ Yes | ☒ **No** - Have doors been moved on their hinges?

### Has it been observed

- ☐ Yes | ☒ **No** - Falling pieces of plaster from the ceilings?  
☐ Yes | ☒ **No** - Cracks in wall plaster?  
☐ Yes | ☒ **No** - An exceptional fall of a chimney in poor condition?  
☐ Yes | ☒ **No** - An exceptional fall of some bricks?  
☐ Yes | ☒ **No** - Have there been several damaged chimneys?

How many?:

- ☐ Yes | ☒ **No** - Have there been several chimneys overturned?

How many?:

% for the municipality?:

- ☐ Yes | ☒ **No** - Have there been any falls of façade ornaments?

How important?:

- ☐ Yes | ☒ **No** - Have there been deep cracks in the brick walls?  
☐ Yes | ☒ **No** - Have there been deep cracks in the concrete walls?  
☐ Yes | ☒ **No** - Have there been landslides along the banks or slopes?

Importance:

ADDITIONAL COMMENTS:

## Official inquiry for MONT-SAINTE-ALDEGONDE (BE)

Location: 50.429°N 4.233°E, at 8.3 km from the epicentre.

Imin: 5 - Imax: 5

### Did some residents perceive

- ☒ **Yes** | ☐ No - Light vibrations?  
☒ **Yes** | ☐ No - A characteristic noise: rumbling or rolling?

### Did many residents perceive

- ☒ **Yes** | ☐ No - A clear shaking of the building?  
☐ Yes | ☒ **No** - A loud rumble?

### Have we witnessed

- ☐ Yes | ☒ **No** - The oscillation of chandeliers or freely suspended objects?  
☒ **Yes** | ☐ No - Swinging chairs or beds?  
☐ Yes | ☒ **No** - Cracking ceilings?  
☒ **Yes** | ☐ No - Sleepers waking up?

### Has it been witnessed or later observed

- ☒ **Yes** | ☐ No - The shivering of windows and doors?  
☒ **Yes** | ☐ No - The shaking of movable objects (tables, vases, knick-knacks, ...)?

### Has it been witnessed or later observed

- ☒ **Yes** | ☐ No - The clattering of glasses and dishes in buffets?  
☒ **Yes** | ☐ No - The swaying of frames hanging on the wall?  
☐ Yes | ☒ **No** - The creaking of floors?  
☐ Yes | ☒ **No** - Small fragments of plaster falling from ceilings?  
☒ **Yes** | ☐ No - A confusion of the inhabitants (people leaving the house).

### Has it been observed

- ☒ **Yes** | ☐ No - Moving knick-knacks?  
☒ **Yes** | ☐ No - Moving light objects?  
 Which ones?: **Verres dans une armoire.**  
☐ Yes | ☒ **No** - The falling of frames hanging on the wall?  
☒ **Yes** | ☐ No - The falling of light objects placed on polished furniture or marble  
☐ Yes | ☒ **No** - Cracked or broken windows?  
☐ Yes | ☒ **No** - Broken crockery?  
☒ **Yes** | ☐ No - Light objects (vases, flower pots, etc.) spilled?  
☐ Yes | ☒ **No** - Has light furniture moved?  
☐ Yes | ☒ **No** - Has heavy furniture (chests, stoves, ...) vibrated?  
☐ Yes | ☒ **No** - Did bells tinkle?  
☐ Yes | ☒ **No** - Did heavy furniture move?  
☐ Yes | ☒ **No** - Did light furniture tip over?  
☐ Yes | ☒ **No** - Have doors been moved on their hinges?

### Has it been observed

- ☐ Yes | ☒ **No** - Falling pieces of plaster from the ceilings?  
☐ Yes | ☒ **No** - Cracks in wall plaster?  
☐ Yes | ☒ **No** - An exceptional fall of a chimney in poor condition?  
☐ Yes | ☒ **No** - An exceptional fall of some bricks?  
☐ Yes | ☒ **No** - Have there been several damaged chimneys?

How many?:

- ☐ Yes | ☒ **No** - Have there been several chimneys overturned?

How many?:

% for the municipality?:

- ☐ Yes | ☒ **No** - Have there been any falls of façade ornaments?

How important?:

- ☐ Yes | ☒ **No** - Have there been deep cracks in the brick walls?  
☐ Yes | ☒ **No** - Have there been deep cracks in the concrete walls?  
☐ Yes | ☒ **No** - Have there been landslides along the banks or slopes?

Importance:

ADDITIONAL COMMENTS:

## Official inquiry for MONT-SAINTE-GENEVIEVE (BE)

Location: 50.375°N 4.234°E, at 11.7 km from the epicentre.

**Imin: 3 - Imax: 3**

### Did some residents perceive

- ☒ **Yes** | ☐ **No** - Light vibrations?  
☐ **Yes** | ☒ **No** - A characteristic noise: rumbling or rolling?

### Did many residents perceive

- ☐ **Yes** | ☒ **No** - A clear shaking of the building?  
☐ **Yes** | ☒ **No** - A loud rumble?

### Have we witnessed

- ☐ **Yes** | ☒ **No** - The oscillation of chandeliers or freely suspended objects?  
☐ **Yes** | ☒ **No** - Swinging chairs or beds?  
☐ **Yes** | ☒ **No** - Cracking ceilings?  
☐ **Yes** | ☒ **No** - Sleepers waking up?

### Has it been witnessed or later observed

- ☒ **Yes** | ☐ **No** - The shivering of windows and doors?  
☐ **Yes** | ☒ **No** - The shaking of movable objects (tables, vases, knick-knacks, ...)?

### Has it been witnessed or later observed

- ☐ **Yes** | ☒ **No** - The clattering of glasses and dishes in buffets?  
☐ **Yes** | ☒ **No** - The swaying of frames hanging on the wall?  
☐ **Yes** | ☒ **No** - The creaking of floors?  
☐ **Yes** | ☒ **No** - Small fragments of plaster falling from ceilings?  
☐ **Yes** | ☒ **No** - A confusion of the inhabitants (people leaving the house).

### Has it been observed

- ☐ **Yes** | ☒ **No** - Moving knick-knacks?  
☐ **Yes** | ☒ **No** - Moving light objects?  
 Which ones?:  
☐ **Yes** | ☒ **No** - The falling of frames hanging on the wall?  
☐ **Yes** | ☒ **No** - The falling of light objects placed on polished furniture or marble  
☐ **Yes** | ☒ **No** - Cracked or broken windows?  
☐ **Yes** | ☒ **No** - Broken crockery?  
☐ **Yes** | ☒ **No** - Light objects (vases, flower pots, etc.) spilled?  
☐ **Yes** | ☒ **No** - Has light furniture moved?  
☐ **Yes** | ☒ **No** - Has heavy furniture (chests, stoves, ...) vibrated?  
☐ **Yes** | ☒ **No** - Did bells tinkle?  
☐ **Yes** | ☒ **No** - Did heavy furniture move?  
☐ **Yes** | ☒ **No** - Did light furniture tip over?  
☐ **Yes** | ☒ **No** - Have doors been moved on their hinges?

### Has it been observed

- ☐ **Yes** | ☒ **No** - Falling pieces of plaster from the ceilings?  
☐ **Yes** | ☒ **No** - Cracks in wall plaster?  
☐ **Yes** | ☒ **No** - An exceptional fall of a chimney in poor condition?  
☐ **Yes** | ☒ **No** - An exceptional fall of some bricks?  
☐ **Yes** | ☒ **No** - Have there been several damaged chimneys?

How many?:

- ☐ **Yes** | ☒ **No** - Have there been several chimneys overturned?

How many?:

% for the municipality?:

- ☐ **Yes** | ☒ **No** - Have there been any falls of façade ornaments?

How important?:

- ☐ **Yes** | ☒ **No** - Have there been deep cracks in the brick walls?  
☐ **Yes** | ☒ **No** - Have there been deep cracks in the concrete walls?  
☐ **Yes** | ☒ **No** - Have there been landslides along the banks or slopes?

Importance:

ADDITIONAL COMMENTS:

## Official inquiry for MORLANWELZ-MARIE MONT (BE)

Location: 50.456°N 4.244°E, at 8.8 km from the epicentre.

**Imin: 5 - Imax: 5**

### Did some residents perceive

- ☐ Yes | ☒ **No** - Light vibrations?  
☐ Yes | ☒ **No** - A characteristic noise: rumbling or rolling?

### Did many residents perceive

- ☐ Yes | ☒ **No** - A clear shaking of the building?  
☒ **Yes** | ☐ No - A loud rumble?

### Have we witnessed

- ☒ **Yes** | ☐ No - The oscillation of chandeliers or freely suspended objects?  
☒ **Yes** | ☐ No - Swinging chairs or beds?  
☐ Yes | ☒ **No** - Cracking ceilings?  
☒ **Yes** | ☐ No - Sleepers waking up?

### Has it been witnessed or later observed

- ☒ **Yes** | ☐ No - The shivering of windows and doors?  
☒ **Yes** | ☐ No - The shaking of movable objects (tables, vases, knick-knacks, ...)?

### Has it been witnessed or later observed

- ☒ **Yes** | ☐ No - The clattering of glasses and dishes in buffets?  
☐ Yes | ☒ **No** - The swaying of frames hanging on the wall?  
☐ Yes | ☒ **No** - The creaking of floors?  
☐ Yes | ☒ **No** - Small fragments of plaster falling from ceilings?  
☒ **Yes** | ☐ No - A confusion of the inhabitants (people leaving the house).

### Has it been observed

- ☐ Yes | ☒ **No** - Moving knick-knacks?  
☐ Yes | ☒ **No** - Moving light objects?  
 Which ones?:  
☐ Yes | ☒ **No** - The falling of frames hanging on the wall?  
☐ Yes | ☒ **No** - The falling of light objects placed on polished furniture or marble  
☐ Yes | ☒ **No** - Cracked or broken windows?  
☐ Yes | ☒ **No** - Broken crockery?  
☐ Yes | ☒ **No** - Light objects (vases, flower pots, etc.) spilled?  
☐ Yes | ☒ **No** - Has light furniture moved?  
☐ Yes | ☒ **No** - Has heavy furniture (chests, stoves, ...) vibrated?  
☐ Yes | ☒ **No** - Did bells tinkle?  
☐ Yes | ☒ **No** - Did heavy furniture move?  
☐ Yes | ☒ **No** - Did light furniture tip over?  
☐ Yes | ☒ **No** - Have doors been moved on their hinges?

### Has it been observed

- ☐ Yes | ☒ **No** - Falling pieces of plaster from the ceilings?  
☐ Yes | ☒ **No** - Cracks in wall plaster?  
☒ **Yes** | ☐ No - An exceptional fall of a chimney in poor condition?  
☐ Yes | ☒ **No** - An exceptional fall of some bricks?  
☐ Yes | ☒ **No** - Have there been several damaged chimneys?

How many?:

- ☐ Yes | ☒ **No** - Have there been several chimneys overturned?

How many?:

% for the municipality?:

- ☐ Yes | ☒ **No** - Have there been any falls of façade ornaments?

How important?:

- ☐ Yes | ☒ **No** - Have there been deep cracks in the brick walls?  
☐ Yes | ☒ **No** - Have there been deep cracks in the concrete walls?  
☐ Yes | ☒ **No** - Have there been landslides along the banks or slopes?

Importance:

ADDITIONAL COMMENTS:

## Official inquiry for NAAST (BE)

Location: 50.552°N 4.103°E, at 11.4 km from the epicentre.

**Imin: 3 - Imax: 4**

### Did some residents perceive

- ☒ **Yes** | ☐ No - Light vibrations?  
☒ **Yes** | ☐ No - A characteristic noise: rumbling or rolling?

### Did many residents perceive

- ☐ Yes | ☒ **No** - A clear shaking of the building?  
☐ Yes | ☒ **No** - A loud rumble?

### Have we witnessed

- ☒ **Yes** | ☐ No - The oscillation of chandeliers or freely suspended objects?  
☐ Yes | ☒ **No** - Swinging chairs or beds?  
☐ Yes | ☒ **No** - Cracking ceilings?  
☐ Yes | ☒ **No** - Sleepers waking up?

### Has it been witnessed or later observed

- ☒ **Yes** | ☐ No - The shivering of windows and doors?  
☒ **Yes** | ☐ No - The shaking of movable objects (tables, vases, knick-knacks, ...)?

### Has it been witnessed or later observed

- ☐ Yes | ☒ **No** - The clattering of glasses and dishes in buffets?  
☐ Yes | ☒ **No** - The swaying of frames hanging on the wall?  
☐ Yes | ☒ **No** - The creaking of floors?  
☐ Yes | ☒ **No** - Small fragments of plaster falling from ceilings?  
☐ Yes | ☒ **No** - A confusion of the inhabitants (people leaving the house).

### Has it been observed

- ☐ Yes | ☒ **No** - Moving knick-knacks?  
☐ Yes | ☒ **No** - Moving light objects?  
 Which ones?:  
☐ Yes | ☒ **No** - The falling of frames hanging on the wall?  
☐ Yes | ☒ **No** - The falling of light objects placed on polished furniture or marble  
☐ Yes | ☒ **No** - Cracked or broken windows?  
☐ Yes | ☒ **No** - Broken crockery?  
☐ Yes | ☒ **No** - Light objects (vases, flower pots, etc.) spilled?  
☐ Yes | ☒ **No** - Has light furniture moved?  
☐ Yes | ☒ **No** - Has heavy furniture (chests, stoves, ...) vibrated?  
☐ Yes | ☒ **No** - Did bells tinkle?  
☐ Yes | ☒ **No** - Did heavy furniture move?  
☐ Yes | ☒ **No** - Did light furniture tip over?  
☐ Yes | ☒ **No** - Have doors been moved on their hinges?

### Has it been observed

- ☐ Yes | ☒ **No** - Falling pieces of plaster from the ceilings?  
☐ Yes | ☒ **No** - Cracks in wall plaster?  
☐ Yes | ☒ **No** - An exceptional fall of a chimney in poor condition?  
☐ Yes | ☒ **No** - An exceptional fall of some bricks?  
☐ Yes | ☒ **No** - Have there been several damaged chimneys?

How many?:

- ☐ Yes | ☒ **No** - Have there been several chimneys overturned?

How many?:

% for the municipality?:

- ☐ Yes | ☒ **No** - Have there been any falls of façade ornaments?

How important?:

- ☐ Yes | ☒ **No** - Have there been deep cracks in the brick walls?  
☐ Yes | ☒ **No** - Have there been deep cracks in the concrete walls?  
☐ Yes | ☒ **No** - Have there been landslides along the banks or slopes?

Importance:

ADDITIONAL COMMENTS:

## Official inquiry for NIMY (BE)

Location: 50.473°N 3.959°E, at 11.7 km from the epicentre.

**Imin: 2 - Imax: 2**

### Did some residents perceive

- ☒ **Yes** | ☐ **No** - Light vibrations?  
☐ **Yes** | ☒ **No** - A characteristic noise: rumbling or rolling?

### Did many residents perceive

- ☐ **Yes** | ☒ **No** - A clear shaking of the building?  
☐ **Yes** | ☒ **No** - A loud rumble?

### Have we witnessed

- ☐ **Yes** | ☒ **No** - The oscillation of chandeliers or freely suspended objects?  
☐ **Yes** | ☒ **No** - Swinging chairs or beds?  
☐ **Yes** | ☒ **No** - Cracking ceilings?  
☐ **Yes** | ☒ **No** - Sleepers waking up?

### Has it been witnessed or later observed

- ☐ **Yes** | ☒ **No** - The shivering of windows and doors?  
☐ **Yes** | ☒ **No** - The shaking of movable objects (tables, vases, knick-knacks, ...)?

### Has it been witnessed or later observed

- ☐ **Yes** | ☒ **No** - The clattering of glasses and dishes in buffets?  
☐ **Yes** | ☒ **No** - The swaying of frames hanging on the wall?  
☐ **Yes** | ☒ **No** - The creaking of floors?  
☐ **Yes** | ☒ **No** - Small fragments of plaster falling from ceilings?  
☐ **Yes** | ☒ **No** - A confusion of the inhabitants (people leaving the house).

### Has it been observed

- ☐ **Yes** | ☒ **No** - Moving knick-knacks?  
☐ **Yes** | ☒ **No** - Moving light objects?  
 Which ones?:  
☐ **Yes** | ☒ **No** - The falling of frames hanging on the wall?  
☐ **Yes** | ☒ **No** - The falling of light objects placed on polished furniture or marble  
☐ **Yes** | ☒ **No** - Cracked or broken windows?  
☐ **Yes** | ☒ **No** - Broken crockery?  
☐ **Yes** | ☒ **No** - Light objects (vases, flower pots, etc.) spilled?  
☐ **Yes** | ☒ **No** - Has light furniture moved?  
☐ **Yes** | ☒ **No** - Has heavy furniture (chests, stoves, ...) vibrated?  
☐ **Yes** | ☒ **No** - Did bells tinkle?  
☐ **Yes** | ☒ **No** - Did heavy furniture move?  
☐ **Yes** | ☒ **No** - Did light furniture tip over?  
☐ **Yes** | ☒ **No** - Have doors been moved on their hinges?

### Has it been observed

- ☐ **Yes** | ☒ **No** - Falling pieces of plaster from the ceilings?  
☐ **Yes** | ☒ **No** - Cracks in wall plaster?  
☐ **Yes** | ☒ **No** - An exceptional fall of a chimney in poor condition?  
☐ **Yes** | ☒ **No** - An exceptional fall of some bricks?  
☐ **Yes** | ☒ **No** - Have there been several damaged chimneys?

How many?:

- ☐ **Yes** | ☒ **No** - Have there been several chimneys overturned?

How many?:

% for the municipality?:

- ☐ **Yes** | ☒ **No** - Have there been any falls of façade ornaments?

How important?:

- ☐ **Yes** | ☒ **No** - Have there been deep cracks in the brick walls?  
☐ **Yes** | ☒ **No** - Have there been deep cracks in the concrete walls?  
☐ **Yes** | ☒ **No** - Have there been landslides along the banks or slopes?

Importance:

ADDITIONAL COMMENTS:

## Official inquiry for NOUVELLES (BE)

Location: 50.412°N 3.969°E, at 11.5 km from the epicentre.

**Imin: 3 - Imax: 4**

### Did some residents perceive

- ☐ Yes | ☒ **No** - Light vibrations?  
☐ Yes | ☒ **No** - A characteristic noise: rumbling or rolling?

### Did many residents perceive

- ☒ **Yes** | ☐ No - A clear shaking of the building?  
☐ Yes | ☒ **No** - A loud rumble?

### Have we witnessed

- ☒ **Yes** | ☐ No - The oscillation of chandeliers or freely suspended objects?  
☐ Yes | ☒ **No** - Swinging chairs or beds?  
☐ Yes | ☒ **No** - Cracking ceilings?  
☐ Yes | ☒ **No** - Sleepers waking up?

### Has it been witnessed or later observed

- ☒ **Yes** | ☐ No - The shivering of windows and doors?  
☐ Yes | ☒ **No** - The shaking of movable objects (tables, vases, knick-knacks, ...)?

### Has it been witnessed or later observed

- ☐ Yes | ☒ **No** - The clattering of glasses and dishes in buffets?  
☐ Yes | ☒ **No** - The swaying of frames hanging on the wall?  
☐ Yes | ☒ **No** - The creaking of floors?  
☐ Yes | ☒ **No** - Small fragments of plaster falling from ceilings?  
☐ Yes | ☒ **No** - A confusion of the inhabitants (people leaving the house).

### Has it been observed

- ☐ Yes | ☒ **No** - Moving knick-knacks?  
☐ Yes | ☒ **No** - Moving light objects?  
 Which ones?:  
☐ Yes | ☒ **No** - The falling of frames hanging on the wall?  
☐ Yes | ☒ **No** - The falling of light objects placed on polished furniture or marble  
☐ Yes | ☒ **No** - Cracked or broken windows?  
☐ Yes | ☒ **No** - Broken crockery?  
☐ Yes | ☒ **No** - Light objects (vases, flower pots, etc.) spilled?  
☐ Yes | ☒ **No** - Has light furniture moved?  
☐ Yes | ☒ **No** - Has heavy furniture (chests, stoves, ...) vibrated?  
☐ Yes | ☒ **No** - Did bells tinkle?  
☐ Yes | ☒ **No** - Did heavy furniture move?  
☐ Yes | ☒ **No** - Did light furniture tip over?  
☐ Yes | ☒ **No** - Have doors been moved on their hinges?

### Has it been observed

- ☐ Yes | ☒ **No** - Falling pieces of plaster from the ceilings?  
☐ Yes | ☒ **No** - Cracks in wall plaster?  
☐ Yes | ☒ **No** - An exceptional fall of a chimney in poor condition?  
☐ Yes | ☒ **No** - An exceptional fall of some bricks?  
☐ Yes | ☒ **No** - Have there been several damaged chimneys?

How many?:

- ☐ Yes | ☒ **No** - Have there been several chimneys overturned?

How many?:

% for the municipality?:

- ☐ Yes | ☒ **No** - Have there been any falls of façade ornaments?

How important?:

- ☐ Yes | ☒ **No** - Have there been deep cracks in the brick walls?  
☐ Yes | ☒ **No** - Have there been deep cracks in the concrete walls?  
☐ Yes | ☒ **No** - Have there been landslides along the banks or slopes?

Importance:

ADDITIONAL COMMENTS:

## Official inquiry for OBOURG (BE)

Location: 50.475°N 4.008°E, at 8.4 km from the epicentre.

**Imin: 4 - Imax: 4**

### Did some residents perceive

- ☒ **Yes** | ☐ No - Light vibrations?  
☒ **Yes** | ☐ No - A characteristic noise: rumbling or rolling?

### Did many residents perceive

- ☐ Yes | ☒ **No** - A clear shaking of the building?  
☒ **Yes** | ☐ No - A loud rumble?

### Have we witnessed

- ☒ **Yes** | ☐ No - The oscillation of chandeliers or freely suspended objects?  
☐ Yes | ☒ **No** - Swinging chairs or beds?  
☐ Yes | ☒ **No** - Cracking ceilings?  
☐ Yes | ☒ **No** - Sleepers waking up?

### Has it been witnessed or later observed

- ☒ **Yes** | ☐ No - The shivering of windows and doors?  
☒ **Yes** | ☐ No - The shaking of movable objects (tables, vases, knick-knacks, ...)?

### Has it been witnessed or later observed

- ☒ **Yes** | ☐ No - The clattering of glasses and dishes in buffets?  
☒ **Yes** | ☐ No - The swaying of frames hanging on the wall?  
☐ Yes | ☒ **No** - The creaking of floors?  
☐ Yes | ☒ **No** - Small fragments of plaster falling from ceilings?  
☒ **Yes** | ☐ No - A confusion of the inhabitants (people leaving the house).

### Has it been observed

- ☐ Yes | ☒ **No** - Moving knick-knacks?  
☐ Yes | ☒ **No** - Moving light objects?  
 Which ones?:  
☐ Yes | ☒ **No** - The falling of frames hanging on the wall?  
☐ Yes | ☒ **No** - The falling of light objects placed on polished furniture or marble  
☐ Yes | ☒ **No** - Cracked or broken windows?  
☐ Yes | ☒ **No** - Broken crockery?  
☐ Yes | ☒ **No** - Light objects (vases, flower pots, etc.) spilled?  
☐ Yes | ☒ **No** - Has light furniture moved?  
☐ Yes | ☒ **No** - Has heavy furniture (chests, stoves, ...) vibrated?  
☐ Yes | ☒ **No** - Did bells tinkle?  
☐ Yes | ☒ **No** - Did heavy furniture move?  
☐ Yes | ☒ **No** - Did light furniture tip over?  
☐ Yes | ☒ **No** - Have doors been moved on their hinges?

### Has it been observed

- ☐ Yes | ☒ **No** - Falling pieces of plaster from the ceilings?  
☐ Yes | ☒ **No** - Cracks in wall plaster?  
☐ Yes | ☒ **No** - An exceptional fall of a chimney in poor condition?  
☐ Yes | ☒ **No** - An exceptional fall of some bricks?  
☐ Yes | ☒ **No** - Have there been several damaged chimneys?

How many?:

- ☐ Yes | ☒ **No** - Have there been several chimneys overturned?

How many?:

% for the municipality?:

- ☐ Yes | ☒ **No** - Have there been any falls of façade ornaments?

How important?:

- ☐ Yes | ☒ **No** - Have there been deep cracks in the brick walls?  
☐ Yes | ☒ **No** - Have there been deep cracks in the concrete walls?  
☐ Yes | ☒ **No** - Have there been landslides along the banks or slopes?

Importance:

ADDITIONAL COMMENTS:

## Official inquiry for OISQUERCQ (BE)

Location: 50.671°N 4.037°E, at 25.2 km from the epicentre.

**Imin: 2 - Imax: 2**

### Did some residents perceive

- ☒ **Yes** | ☐ **No** - Light vibrations?  
☐ **Yes** | ☒ **No** - A characteristic noise: rumbling or rolling?

### Did many residents perceive

- ☐ **Yes** | ☒ **No** - A clear shaking of the building?  
☐ **Yes** | ☒ **No** - A loud rumble?

### Have we witnessed

- ☐ **Yes** | ☒ **No** - The oscillation of chandeliers or freely suspended objects?  
☐ **Yes** | ☒ **No** - Swinging chairs or beds?  
☐ **Yes** | ☒ **No** - Cracking ceilings?  
☐ **Yes** | ☒ **No** - Sleepers waking up?

### Has it been witnessed or later observed

- ☐ **Yes** | ☒ **No** - The shivering of windows and doors?  
☐ **Yes** | ☒ **No** - The shaking of movable objects (tables, vases, knick-knacks, ...)?

### Has it been witnessed or later observed

- ☐ **Yes** | ☒ **No** - The clattering of glasses and dishes in buffets?  
☐ **Yes** | ☒ **No** - The swaying of frames hanging on the wall?  
☐ **Yes** | ☒ **No** - The creaking of floors?  
☐ **Yes** | ☒ **No** - Small fragments of plaster falling from ceilings?  
☐ **Yes** | ☒ **No** - A confusion of the inhabitants (people leaving the house).

### Has it been observed

- ☐ **Yes** | ☒ **No** - Moving knick-knacks?  
☐ **Yes** | ☒ **No** - Moving light objects?  
 Which ones?:  
☐ **Yes** | ☒ **No** - The falling of frames hanging on the wall?  
☐ **Yes** | ☒ **No** - The falling of light objects placed on polished furniture or marble  
☐ **Yes** | ☒ **No** - Cracked or broken windows?  
☐ **Yes** | ☒ **No** - Broken crockery?  
☐ **Yes** | ☒ **No** - Light objects (vases, flower pots, etc.) spilled?  
☐ **Yes** | ☒ **No** - Has light furniture moved?  
☐ **Yes** | ☒ **No** - Has heavy furniture (chests, stoves, ...) vibrated?  
☐ **Yes** | ☒ **No** - Did bells tinkle?  
☐ **Yes** | ☒ **No** - Did heavy furniture move?  
☐ **Yes** | ☒ **No** - Did light furniture tip over?  
☐ **Yes** | ☒ **No** - Have doors been moved on their hinges?

### Has it been observed

- ☐ **Yes** | ☒ **No** - Falling pieces of plaster from the ceilings?  
☐ **Yes** | ☒ **No** - Cracks in wall plaster?  
☐ **Yes** | ☒ **No** - An exceptional fall of a chimney in poor condition?  
☐ **Yes** | ☒ **No** - An exceptional fall of some bricks?  
☐ **Yes** | ☒ **No** - Have there been several damaged chimneys?

How many?:

- ☐ **Yes** | ☒ **No** - Have there been several chimneys overturned?

How many?:

% for the municipality?:

- ☐ **Yes** | ☒ **No** - Have there been any falls of façade ornaments?

How important?:

- ☐ **Yes** | ☒ **No** - Have there been deep cracks in the brick walls?  
☐ **Yes** | ☒ **No** - Have there been deep cracks in the concrete walls?  
☐ **Yes** | ☒ **No** - Have there been landslides along the banks or slopes?

Importance:

ADDITIONAL COMMENTS:

## Official inquiry for PATURAGES (BE)

Location: 50.414°N 3.862°E, at 18.8 km from the epicentre.

**Imin: 2 - Imax: 2**

### Did some residents perceive

- ☐ Yes | ☒ **No** - Light vibrations?  
☐ Yes | ☒ **No** - A characteristic noise: rumbling or rolling?

### Did many residents perceive

- ☐ Yes | ☒ **No** - A clear shaking of the building?  
☐ Yes | ☒ **No** - A loud rumble?

### Have we witnessed

- ☒ **Yes** | ☐ No - The oscillation of chandeliers or freely suspended objects?  
☒ **Yes** | ☐ No - Swinging chairs or beds?  
☐ Yes | ☒ **No** - Cracking ceilings?  
☐ Yes | ☒ **No** - Sleepers waking up?

### Has it been witnessed or later observed

- ☐ Yes | ☒ **No** - The shivering of windows and doors?  
☐ Yes | ☒ **No** - The shaking of movable objects (tables, vases, knick-knacks, ...)?

### Has it been witnessed or later observed

- ☐ Yes | ☒ **No** - The clattering of glasses and dishes in buffets?  
☐ Yes | ☒ **No** - The swaying of frames hanging on the wall?  
☐ Yes | ☒ **No** - The creaking of floors?  
☐ Yes | ☒ **No** - Small fragments of plaster falling from ceilings?  
☐ Yes | ☒ **No** - A confusion of the inhabitants (people leaving the house).

### Has it been observed

- ☐ Yes | ☒ **No** - Moving knick-knacks?  
☐ Yes | ☒ **No** - Moving light objects?  
 Which ones?:  
☐ Yes | ☒ **No** - The falling of frames hanging on the wall?  
☐ Yes | ☒ **No** - The falling of light objects placed on polished furniture or marble  
☐ Yes | ☒ **No** - Cracked or broken windows?  
☐ Yes | ☒ **No** - Broken crockery?  
☐ Yes | ☒ **No** - Light objects (vases, flower pots, etc.) spilled?  
☐ Yes | ☒ **No** - Has light furniture moved?  
☐ Yes | ☒ **No** - Has heavy furniture (chests, stoves, ...) vibrated?  
☐ Yes | ☒ **No** - Did bells tinkle?  
☐ Yes | ☒ **No** - Did heavy furniture move?  
☐ Yes | ☒ **No** - Did light furniture tip over?  
☐ Yes | ☒ **No** - Have doors been moved on their hinges?

### Has it been observed

- ☐ Yes | ☒ **No** - Falling pieces of plaster from the ceilings?  
☐ Yes | ☒ **No** - Cracks in wall plaster?  
☐ Yes | ☒ **No** - An exceptional fall of a chimney in poor condition?  
☐ Yes | ☒ **No** - An exceptional fall of some bricks?  
☐ Yes | ☒ **No** - Have there been several damaged chimneys?

How many?:

- ☐ Yes | ☒ **No** - Have there been several chimneys overturned?

How many?:

% for the municipality?:

- ☐ Yes | ☒ **No** - Have there been any falls of façade ornaments?

How important?:

- ☐ Yes | ☒ **No** - Have there been deep cracks in the brick walls?  
☐ Yes | ☒ **No** - Have there been deep cracks in the concrete walls?  
☐ Yes | ☒ **No** - Have there been landslides along the banks or slopes?

Importance:

ADDITIONAL COMMENTS:

## Official inquiry for PEISSANT (BE)

Location: 50.351°N 4.12°E, at 11.0 km from the epicentre.

**Imin: 3 - Imax: 3**

### Did some residents perceive

- ☒ **Yes** | ☐ No - Light vibrations?  
☐ Yes | ☒ **No** - A characteristic noise: rumbling or rolling?

### Did many residents perceive

- ☐ Yes | ☒ **No** - A clear shaking of the building?  
☐ Yes | ☒ **No** - A loud rumble?

### Have we witnessed

- ☐ Yes | ☒ **No** - The oscillation of chandeliers or freely suspended objects?  
☒ **Yes** | ☐ No - Swinging chairs or beds?  
☐ Yes | ☒ **No** - Cracking ceilings?  
☐ Yes | ☒ **No** - Sleepers waking up?

### Has it been witnessed or later observed

- ☒ **Yes** | ☐ No - The shivering of windows and doors?  
☐ Yes | ☒ **No** - The shaking of movable objects (tables, vases, knick-knacks, ...)?

### Has it been witnessed or later observed

- ☐ Yes | ☒ **No** - The clattering of glasses and dishes in buffets?  
☐ Yes | ☒ **No** - The swaying of frames hanging on the wall?  
☐ Yes | ☒ **No** - The creaking of floors?  
☐ Yes | ☒ **No** - Small fragments of plaster falling from ceilings?  
☐ Yes | ☒ **No** - A confusion of the inhabitants (people leaving the house).

### Has it been observed

- ☐ Yes | ☒ **No** - Moving knick-knacks?  
☐ Yes | ☒ **No** - Moving light objects?  
 Which ones?:  
☐ Yes | ☒ **No** - The falling of frames hanging on the wall?  
☐ Yes | ☒ **No** - The falling of light objects placed on polished furniture or marble  
☐ Yes | ☒ **No** - Cracked or broken windows?  
☐ Yes | ☒ **No** - Broken crockery?  
☐ Yes | ☒ **No** - Light objects (vases, flower pots, etc.) spilled?  
☐ Yes | ☒ **No** - Has light furniture moved?  
☐ Yes | ☒ **No** - Has heavy furniture (chests, stoves, ...) vibrated?  
☐ Yes | ☒ **No** - Did bells tinkle?  
☐ Yes | ☒ **No** - Did heavy furniture move?  
☐ Yes | ☒ **No** - Did light furniture tip over?  
☐ Yes | ☒ **No** - Have doors been moved on their hinges?

### Has it been observed

- ☐ Yes | ☒ **No** - Falling pieces of plaster from the ceilings?  
☐ Yes | ☒ **No** - Cracks in wall plaster?  
☐ Yes | ☒ **No** - An exceptional fall of a chimney in poor condition?  
☐ Yes | ☒ **No** - An exceptional fall of some bricks?  
☐ Yes | ☒ **No** - Have there been several damaged chimneys?

How many?:

- ☐ Yes | ☒ **No** - Have there been several chimneys overturned?

How many?:

% for the municipality?:

- ☐ Yes | ☒ **No** - Have there been any falls of façade ornaments?

How important?:

- ☐ Yes | ☒ **No** - Have there been deep cracks in the brick walls?  
☐ Yes | ☒ **No** - Have there been deep cracks in the concrete walls?  
☐ Yes | ☒ **No** - Have there been landslides along the banks or slopes?

Importance:

ADDITIONAL COMMENTS:

## Official inquiry for PERONNES-LEZ-BINCHE (BE)

Location: 50.436°N 4.146°E, at 2.4 km from the epicentre.

Imin: 5 - Imax: 5

### Did some residents perceive

- ☒ **Yes** | ☐ No - Light vibrations?  
☒ **Yes** | ☐ No - A characteristic noise: rumbling or rolling?

### Did many residents perceive

- ☒ **Yes** | ☐ No - A clear shaking of the building?  
☒ **Yes** | ☐ No - A loud rumble?

### Have we witnessed

- ☒ **Yes** | ☐ No - The oscillation of chandeliers or freely suspended objects?  
☒ **Yes** | ☐ No - Swinging chairs or beds?  
☐ Yes | ☒ **No** - Cracking ceilings?  
☒ **Yes** | ☐ No - Sleepers waking up?

### Has it been witnessed or later observed

- ☒ **Yes** | ☐ No - The shivering of windows and doors?  
☒ **Yes** | ☐ No - The shaking of movable objects (tables, vases, knick-knacks, ...)?

### Has it been witnessed or later observed

- ☒ **Yes** | ☐ No - The clattering of glasses and dishes in buffets?  
☒ **Yes** | ☐ No - The swaying of frames hanging on the wall?  
☐ Yes | ☒ **No** - The creaking of floors?  
☐ Yes | ☒ **No** - Small fragments of plaster falling from ceilings?  
☒ **Yes** | ☐ No - A confusion of the inhabitants (people leaving the house).

### Has it been observed

- ☒ **Yes** | ☐ No - Moving knick-knacks?  
☒ **Yes** | ☐ No - Moving light objects?  
 Which ones?: **cendriers, tasses.**  
☐ Yes | ☒ **No** - The falling of frames hanging on the wall?  
☐ Yes | ☒ **No** - The falling of light objects placed on polished furniture or marble  
☐ Yes | ☒ **No** - Cracked or broken windows?  
☒ **Yes** | ☐ No - Broken crockery?  
☒ **Yes** | ☐ No - Light objects (vases, flower pots, etc.) spilled?  
☒ **Yes** | ☐ No - Has light furniture moved?  
☒ **Yes** | ☐ No - Has heavy furniture (chests, stoves, ...) vibrated?  
☐ Yes | ☒ **No** - Did bells tinkle?  
☒ **Yes** | ☐ No - Did heavy furniture move?  
☐ Yes | ☒ **No** - Did light furniture tip over?  
☐ Yes | ☒ **No** - Have doors been moved on their hinges?

### Has it been observed

- ☐ Yes | ☒ **No** - Falling pieces of plaster from the ceilings?  
☐ Yes | ☒ **No** - Cracks in wall plaster?  
☒ **Yes** | ☐ No - An exceptional fall of a chimney in poor condition?  
☒ **Yes** | ☐ No - An exceptional fall of some bricks?  
☒ **Yes** | ☐ No - Have there been several damaged chimneys?

How many?: **cing**

- ☒ **Yes** | ☐ No - Have there been several chimneys overturned?

How many?:

% for the municipality?: **trois**

- ☒ **Yes** | ☐ No - Have there been any falls of façade ornaments?

How important?:

- ☐ Yes | ☒ **No** - Have there been deep cracks in the brick walls?  
☐ Yes | ☒ **No** - Have there been deep cracks in the concrete walls?  
☐ Yes | ☒ **No** - Have there been landslides along the banks or slopes?

Importance:

ADDITIONAL COMMENTS:

## Official inquiry for PIETON (BE)

Location: 50.441°N 4.298°E, at 12.7 km from the epicentre.

**Imin: 3 - Imax: 3**

### Did some residents perceive

- ☒ **Yes** | ☐ No - Light vibrations?  
☒ **Yes** | ☐ No - A characteristic noise: rumbling or rolling?

### Did many residents perceive

- ☐ Yes | ☒ **No** - A clear shaking of the building?  
☐ Yes | ☒ **No** - A loud rumble?

### Have we witnessed

- ☐ Yes | ☒ **No** - The oscillation of chandeliers or freely suspended objects?  
☐ Yes | ☒ **No** - Swinging chairs or beds?  
☐ Yes | ☒ **No** - Cracking ceilings?  
☐ Yes | ☒ **No** - Sleepers waking up?

### Has it been witnessed or later observed

- ☒ **Yes** | ☐ No - The shivering of windows and doors?  
☐ Yes | ☒ **No** - The shaking of movable objects (tables, vases, knick-knacks, ...)?

### Has it been witnessed or later observed

- ☐ Yes | ☒ **No** - The clattering of glasses and dishes in buffets?  
☐ Yes | ☒ **No** - The swaying of frames hanging on the wall?  
☐ Yes | ☒ **No** - The creaking of floors?  
☐ Yes | ☒ **No** - Small fragments of plaster falling from ceilings?  
☐ Yes | ☒ **No** - A confusion of the inhabitants (people leaving the house).

### Has it been observed

- ☐ Yes | ☒ **No** - Moving knick-knacks?  
☐ Yes | ☒ **No** - Moving light objects?  
 Which ones?:  
☐ Yes | ☒ **No** - The falling of frames hanging on the wall?  
☐ Yes | ☒ **No** - The falling of light objects placed on polished furniture or marble  
☐ Yes | ☒ **No** - Cracked or broken windows?  
☐ Yes | ☒ **No** - Broken crockery?  
☐ Yes | ☒ **No** - Light objects (vases, flower pots, etc.) spilled?  
☐ Yes | ☒ **No** - Has light furniture moved?  
☐ Yes | ☒ **No** - Has heavy furniture (chests, stoves, ...) vibrated?  
☐ Yes | ☒ **No** - Did bells tinkle?  
☐ Yes | ☒ **No** - Did heavy furniture move?  
☐ Yes | ☒ **No** - Did light furniture tip over?  
☐ Yes | ☒ **No** - Have doors been moved on their hinges?

### Has it been observed

- ☐ Yes | ☒ **No** - Falling pieces of plaster from the ceilings?  
☐ Yes | ☒ **No** - Cracks in wall plaster?  
☐ Yes | ☒ **No** - An exceptional fall of a chimney in poor condition?  
☐ Yes | ☒ **No** - An exceptional fall of some bricks?  
☐ Yes | ☒ **No** - Have there been several damaged chimneys?

How many?:

- ☐ Yes | ☒ **No** - Have there been several chimneys overturned?

How many?:

% for the municipality?:

- ☐ Yes | ☒ **No** - Have there been any falls of façade ornaments?

How important?:

- ☐ Yes | ☒ **No** - Have there been deep cracks in the brick walls?  
☐ Yes | ☒ **No** - Have there been deep cracks in the concrete walls?  
☐ Yes | ☒ **No** - Have there been landslides along the banks or slopes?

Importance:

ADDITIONAL COMMENTS:

## Official inquiry for QUAREGNON (BE)

Location: 50.443°N 3.865°E, at 18.1 km from the epicentre.

**Imin: 2 - Imax: 2**

### Did some residents perceive

☒ **Yes** | ☐ **No** - Light vibrations?

☒ **Yes** | ☐ **No** - A characteristic noise: rumbling or rolling?

### Did many residents perceive

☐ **Yes** | ☒ **No** - A clear shaking of the building?

☐ **Yes** | ☒ **No** - A loud rumble?

### Have we witnessed

☐ **Yes** | ☒ **No** - The oscillation of chandeliers or freely suspended objects?

☐ **Yes** | ☒ **No** - Swinging chairs or beds?

☐ **Yes** | ☒ **No** - Cracking ceilings?

☐ **Yes** | ☒ **No** - Sleepers waking up?

### Has it been witnessed or later observed

☐ **Yes** | ☒ **No** - The shivering of windows and doors?

☐ **Yes** | ☒ **No** - The shaking of movable objects (tables, vases, knick-knacks, ...)?

### Has it been witnessed or later observed

☐ **Yes** | ☒ **No** - The clattering of glasses and dishes in buffets?

☐ **Yes** | ☒ **No** - The swaying of frames hanging on the wall?

☐ **Yes** | ☒ **No** - The creaking of floors?

☐ **Yes** | ☒ **No** - Small fragments of plaster falling from ceilings?

☐ **Yes** | ☒ **No** - A confusion of the inhabitants (people leaving the house).

### Has it been observed

☐ **Yes** | ☒ **No** - Moving knick-knacks?

☐ **Yes** | ☒ **No** - Moving light objects?

Which ones?:

☐ **Yes** | ☒ **No** - The falling of frames hanging on the wall?

☐ **Yes** | ☒ **No** - The falling of light objects placed on polished furniture or marble

☐ **Yes** | ☒ **No** - Cracked or broken windows?

☐ **Yes** | ☒ **No** - Broken crockery?

☐ **Yes** | ☒ **No** - Light objects (vases, flower pots, etc.) spilled?

☐ **Yes** | ☒ **No** - Has light furniture moved?

☐ **Yes** | ☒ **No** - Has heavy furniture (chests, stoves, ...) vibrated?

☐ **Yes** | ☒ **No** - Did bells tinkle?

☐ **Yes** | ☒ **No** - Did heavy furniture move?

☐ **Yes** | ☒ **No** - Did light furniture tip over?

☐ **Yes** | ☒ **No** - Have doors been moved on their hinges?

### Has it been observed

☐ **Yes** | ☒ **No** - Falling pieces of plaster from the ceilings?

☐ **Yes** | ☒ **No** - Cracks in wall plaster?

☐ **Yes** | ☒ **No** - An exceptional fall of a chimney in poor condition?

☐ **Yes** | ☒ **No** - An exceptional fall of some bricks?

☐ **Yes** | ☒ **No** - Have there been several damaged chimneys?

How many?:

☐ **Yes** | ☒ **No** - Have there been several chimneys overturned?

How many?:

% for the municipality?:

☐ **Yes** | ☒ **No** - Have there been any falls of façade ornaments?

How important?:

☐ **Yes** | ☒ **No** - Have there been deep cracks in the brick walls?

☐ **Yes** | ☒ **No** - Have there been deep cracks in the concrete walls?

☐ **Yes** | ☒ **No** - Have there been landslides along the banks or slopes?

Importance:

ADDITIONAL COMMENTS:

## Official inquiry for QUEVY-LE-GRAND (BE)

Location: 50.359°N 3.947°E, at 15.9 km from the epicentre.

**Imin: 2 - Imax: 2**

### Did some residents perceive

- ☒ **Yes** | ☐ **No** - Light vibrations?  
☐ **Yes** | ☒ **No** - A characteristic noise: rumbling or rolling?

### Did many residents perceive

- ☐ **Yes** | ☒ **No** - A clear shaking of the building?  
☐ **Yes** | ☒ **No** - A loud rumble?

### Have we witnessed

- ☐ **Yes** | ☒ **No** - The oscillation of chandeliers or freely suspended objects?  
☐ **Yes** | ☒ **No** - Swinging chairs or beds?  
☐ **Yes** | ☒ **No** - Cracking ceilings?  
☐ **Yes** | ☒ **No** - Sleepers waking up?

### Has it been witnessed or later observed

- ☐ **Yes** | ☒ **No** - The shivering of windows and doors?  
☐ **Yes** | ☒ **No** - The shaking of movable objects (tables, vases, knick-knacks, ...)?

### Has it been witnessed or later observed

- ☐ **Yes** | ☒ **No** - The clattering of glasses and dishes in buffets?  
☐ **Yes** | ☒ **No** - The swaying of frames hanging on the wall?  
☐ **Yes** | ☒ **No** - The creaking of floors?  
☐ **Yes** | ☒ **No** - Small fragments of plaster falling from ceilings?  
☐ **Yes** | ☒ **No** - A confusion of the inhabitants (people leaving the house).

### Has it been observed

- ☐ **Yes** | ☒ **No** - Moving knick-knacks?  
☐ **Yes** | ☒ **No** - Moving light objects?  
 Which ones?:  
☐ **Yes** | ☒ **No** - The falling of frames hanging on the wall?  
☐ **Yes** | ☒ **No** - The falling of light objects placed on polished furniture or marble  
☐ **Yes** | ☒ **No** - Cracked or broken windows?  
☐ **Yes** | ☒ **No** - Broken crockery?  
☐ **Yes** | ☒ **No** - Light objects (vases, flower pots, etc.) spilled?  
☐ **Yes** | ☒ **No** - Has light furniture moved?  
☐ **Yes** | ☒ **No** - Has heavy furniture (chests, stoves, ...) vibrated?  
☐ **Yes** | ☒ **No** - Did bells tinkle?  
☐ **Yes** | ☒ **No** - Did heavy furniture move?  
☐ **Yes** | ☒ **No** - Did light furniture tip over?  
☐ **Yes** | ☒ **No** - Have doors been moved on their hinges?

### Has it been observed

- ☐ **Yes** | ☒ **No** - Falling pieces of plaster from the ceilings?  
☐ **Yes** | ☒ **No** - Cracks in wall plaster?  
☐ **Yes** | ☒ **No** - An exceptional fall of a chimney in poor condition?  
☐ **Yes** | ☒ **No** - An exceptional fall of some bricks?  
☐ **Yes** | ☒ **No** - Have there been several damaged chimneys?

How many?:

- ☐ **Yes** | ☒ **No** - Have there been several chimneys overturned?

How many?:

% for the municipality?:

- ☐ **Yes** | ☒ **No** - Have there been any falls of façade ornaments?

How important?:

- ☐ **Yes** | ☒ **No** - Have there been deep cracks in the brick walls?  
☐ **Yes** | ☒ **No** - Have there been deep cracks in the concrete walls?  
☐ **Yes** | ☒ **No** - Have there been landslides along the banks or slopes?

Importance:

ADDITIONAL COMMENTS:

## Official inquiry for RESSAIX (BE)

Location: 50.423°N 4.192°E, at 5.9 km from the epicentre.

Imin: 5 - Imax: 5

### Did some residents perceive

- ☐ Yes | ☒ **No** - Light vibrations?  
☒ **Yes** | ☐ No - A characteristic noise: rumbling or rolling?

### Did many residents perceive

- ☒ **Yes** | ☐ No - A clear shaking of the building?  
☒ **Yes** | ☐ No - A loud rumble?

### Have we witnessed

- ☒ **Yes** | ☐ No - The oscillation of chandeliers or freely suspended objects?  
☒ **Yes** | ☐ No - Swinging chairs or beds?  
☒ **Yes** | ☐ No - Cracking ceilings?  
☒ **Yes** | ☐ No - Sleepers waking up?

### Has it been witnessed or later observed

- ☒ **Yes** | ☐ No - The shivering of windows and doors?  
☒ **Yes** | ☐ No - The shaking of movable objects (tables, vases, knick-knacks, ...)?

### Has it been witnessed or later observed

- ☒ **Yes** | ☐ No - The clattering of glasses and dishes in buffets?  
☒ **Yes** | ☐ No - The swaying of frames hanging on the wall?  
☒ **Yes** | ☐ No - The creaking of floors?  
☒ **Yes** | ☐ No - Small fragments of plaster falling from ceilings?  
☒ **Yes** | ☐ No - A confusion of the inhabitants (people leaving the house).

### Has it been observed

- ☒ **Yes** | ☐ No - Moving knick-knacks?  
☒ **Yes** | ☐ No - Moving light objects?  
 Which ones?: **vaisselles, chaises.**  
☒ **Yes** | ☐ No - The falling of frames hanging on the wall?  
☒ **Yes** | ☐ No - The falling of light objects placed on polished furniture or marble  
☐ Yes | ☒ **No** - Cracked or broken windows?  
☒ **Yes** | ☐ No - Broken crockery?  
☒ **Yes** | ☐ No - Light objects (vases, flower pots, etc.) spilled?  
☒ **Yes** | ☐ No - Has light furniture moved?  
☒ **Yes** | ☐ No - Has heavy furniture (chests, stoves, ...) vibrated?  
☐ Yes | ☒ **No** - Did bells tinkle?  
☒ **Yes** | ☐ No - Did heavy furniture move?  
☐ Yes | ☒ **No** - Did light furniture tip over?  
☐ Yes | ☒ **No** - Have doors been moved on their hinges?

### Has it been observed

- ☒ **Yes** | ☐ No - Falling pieces of plaster from the ceilings?  
☒ **Yes** | ☐ No - Cracks in wall plaster?  
☒ **Yes** | ☐ No - An exceptional fall of a chimney in poor condition?  
☒ **Yes** | ☐ No - An exceptional fall of some bricks?  
☒ **Yes** | ☐ No - Have there been several damaged chimneys?

How many?: **quelques unes**

- ☐ Yes | ☒ **No** - Have there been several chimneys overturned?

How many?:

% for the municipality?:

- ☐ Yes | ☒ **No** - Have there been any falls of façade ornaments?

How important?:

- ☐ Yes | ☒ **No** - Have there been deep cracks in the brick walls?  
☐ Yes | ☒ **No** - Have there been deep cracks in the concrete walls?  
☐ Yes | ☒ **No** - Have there been landslides along the banks or slopes?

Importance:

ADDITIONAL COMMENTS:

## Official inquiry for ROUVEROY (BE)

Location: 50.357°N 4.067°E, at 12.2 km from the epicentre.

**Imin: 3 - Imax: 3**

### Did some residents perceive

- ☒ **Yes** | ☐ No - Light vibrations?  
☒ **Yes** | ☐ No - A characteristic noise: rumbling or rolling?

### Did many residents perceive

- ☐ Yes | ☒ **No** - A clear shaking of the building?  
☐ Yes | ☒ **No** - A loud rumble?

### Have we witnessed

- ☐ Yes | ☒ **No** - The oscillation of chandeliers or freely suspended objects?  
☐ Yes | ☒ **No** - Swinging chairs or beds?  
☐ Yes | ☒ **No** - Cracking ceilings?  
☐ Yes | ☒ **No** - Sleepers waking up?

### Has it been witnessed or later observed

- ☒ **Yes** | ☐ No - The shivering of windows and doors?  
☒ **Yes** | ☐ No - The shaking of movable objects (tables, vases, knick-knacks, ...)?

### Has it been witnessed or later observed

- ☒ **Yes** | ☐ No - The clattering of glasses and dishes in buffets?  
☐ Yes | ☒ **No** - The swaying of frames hanging on the wall?  
☐ Yes | ☒ **No** - The creaking of floors?  
☐ Yes | ☒ **No** - Small fragments of plaster falling from ceilings?  
☐ Yes | ☒ **No** - A confusion of the inhabitants (people leaving the house).

### Has it been observed

- ☐ Yes | ☒ **No** - Moving knick-knacks?  
☐ Yes | ☒ **No** - Moving light objects?  
 Which ones?:  
☐ Yes | ☒ **No** - The falling of frames hanging on the wall?  
☒ **Yes** | ☐ No - The falling of light objects placed on polished furniture or marble  
☐ Yes | ☒ **No** - Cracked or broken windows?  
☐ Yes | ☒ **No** - Broken crockery?  
☐ Yes | ☒ **No** - Light objects (vases, flower pots, etc.) spilled?  
☐ Yes | ☒ **No** - Has light furniture moved?  
☐ Yes | ☒ **No** - Has heavy furniture (chests, stoves, ...) vibrated?  
☐ Yes | ☒ **No** - Did bells tinkle?  
☐ Yes | ☒ **No** - Did heavy furniture move?  
☐ Yes | ☒ **No** - Did light furniture tip over?  
☐ Yes | ☒ **No** - Have doors been moved on their hinges?

### Has it been observed

- ☐ Yes | ☒ **No** - Falling pieces of plaster from the ceilings?  
☐ Yes | ☒ **No** - Cracks in wall plaster?  
☐ Yes | ☒ **No** - An exceptional fall of a chimney in poor condition?  
☐ Yes | ☒ **No** - An exceptional fall of some bricks?  
☐ Yes | ☒ **No** - Have there been several damaged chimneys?

How many?:

- ☐ Yes | ☒ **No** - Have there been several chimneys overturned?

How many?:

% for the municipality?:

- ☐ Yes | ☒ **No** - Have there been any falls of façade ornaments?

How important?:

- ☐ Yes | ☒ **No** - Have there been deep cracks in the brick walls?  
☐ Yes | ☒ **No** - Have there been deep cracks in the concrete walls?  
☐ Yes | ☒ **No** - Have there been landslides along the banks or slopes?

Importance:

ADDITIONAL COMMENTS:

## Official inquiry for SAINT-SYMPHORIEN (BE)

Location: 50.438°N 4.007°E, at 8.1 km from the epicentre.

**Imin: 4 - Imax: 4**

### Did some residents perceive

- ☒ **Yes** | ☐ No - Light vibrations?  
☒ **Yes** | ☐ No - A characteristic noise: rumbling or rolling?

### Did many residents perceive

- ☒ **Yes** | ☐ No - A clear shaking of the building?  
☒ **Yes** | ☐ No - A loud rumble?

### Have we witnessed

- ☒ **Yes** | ☐ No - The oscillation of chandeliers or freely suspended objects?  
☒ **Yes** | ☐ No - Swinging chairs or beds?  
☒ **Yes** | ☐ No - Cracking ceilings?  
☒ **Yes** | ☐ No - Sleepers waking up?

### Has it been witnessed or later observed

- ☒ **Yes** | ☐ No - The shivering of windows and doors?  
☒ **Yes** | ☐ No - The shaking of movable objects (tables, vases, knick-knacks, ...)?

### Has it been witnessed or later observed

- ☒ **Yes** | ☐ No - The clattering of glasses and dishes in buffets?  
☒ **Yes** | ☐ No - The swaying of frames hanging on the wall?  
☐ Yes | ☒ **No** - The creaking of floors?  
☐ Yes | ☒ **No** - Small fragments of plaster falling from ceilings?  
☐ Yes | ☒ **No** - A confusion of the inhabitants (people leaving the house).

### Has it been observed

- ☐ Yes | ☒ **No** - Moving knick-knacks?  
☐ Yes | ☒ **No** - Moving light objects?  
 Which ones?:  
☐ Yes | ☒ **No** - The falling of frames hanging on the wall?  
☐ Yes | ☒ **No** - The falling of light objects placed on polished furniture or marble  
☐ Yes | ☒ **No** - Cracked or broken windows?  
☐ Yes | ☒ **No** - Broken crockery?  
☐ Yes | ☒ **No** - Light objects (vases, flower pots, etc.) spilled?  
☐ Yes | ☒ **No** - Has light furniture moved?  
☐ Yes | ☒ **No** - Has heavy furniture (chests, stoves, ...) vibrated?  
☐ Yes | ☒ **No** - Did bells tinkle?  
☐ Yes | ☒ **No** - Did heavy furniture move?  
☐ Yes | ☒ **No** - Did light furniture tip over?  
☐ Yes | ☒ **No** - Have doors been moved on their hinges?

### Has it been observed

- ☐ Yes | ☒ **No** - Falling pieces of plaster from the ceilings?  
☐ Yes | ☒ **No** - Cracks in wall plaster?  
☐ Yes | ☒ **No** - An exceptional fall of a chimney in poor condition?  
☐ Yes | ☒ **No** - An exceptional fall of some bricks?  
☐ Yes | ☒ **No** - Have there been several damaged chimneys?

How many?:

- ☐ Yes | ☒ **No** - Have there been several chimneys overturned?

How many?:

% for the municipality?:

- ☐ Yes | ☒ **No** - Have there been any falls of façade ornaments?

How important?:

- ☐ Yes | ☒ **No** - Have there been deep cracks in the brick walls?  
☐ Yes | ☒ **No** - Have there been deep cracks in the concrete walls?  
☐ Yes | ☒ **No** - Have there been landslides along the banks or slopes?

Importance:

ADDITIONAL COMMENTS:

## Official inquiry for SARS-LA-BRUYERE (BE)

Location: 50.371°N 3.879°E, at 19.2 km from the epicentre.

**Imin: 2 - Imax: 2**

### Did some residents perceive

- ☒ **Yes** | ☐ **No** - Light vibrations?  
☐ **Yes** | ☒ **No** - A characteristic noise: rumbling or rolling?

### Did many residents perceive

- ☐ **Yes** | ☒ **No** - A clear shaking of the building?  
☐ **Yes** | ☒ **No** - A loud rumble?

### Have we witnessed

- ☐ **Yes** | ☒ **No** - The oscillation of chandeliers or freely suspended objects?  
☐ **Yes** | ☒ **No** - Swinging chairs or beds?  
☐ **Yes** | ☒ **No** - Cracking ceilings?  
☐ **Yes** | ☒ **No** - Sleepers waking up?

### Has it been witnessed or later observed

- ☐ **Yes** | ☒ **No** - The shivering of windows and doors?  
☐ **Yes** | ☒ **No** - The shaking of movable objects (tables, vases, knick-knacks, ...)?

### Has it been witnessed or later observed

- ☐ **Yes** | ☒ **No** - The clattering of glasses and dishes in buffets?  
☐ **Yes** | ☒ **No** - The swaying of frames hanging on the wall?  
☐ **Yes** | ☒ **No** - The creaking of floors?  
☐ **Yes** | ☒ **No** - Small fragments of plaster falling from ceilings?  
☐ **Yes** | ☒ **No** - A confusion of the inhabitants (people leaving the house).

### Has it been observed

- ☐ **Yes** | ☒ **No** - Moving knick-knacks?  
☐ **Yes** | ☒ **No** - Moving light objects?  
 Which ones?:  
☐ **Yes** | ☒ **No** - The falling of frames hanging on the wall?  
☐ **Yes** | ☒ **No** - The falling of light objects placed on polished furniture or marble  
☐ **Yes** | ☒ **No** - Cracked or broken windows?  
☐ **Yes** | ☒ **No** - Broken crockery?  
☐ **Yes** | ☒ **No** - Light objects (vases, flower pots, etc.) spilled?  
☐ **Yes** | ☒ **No** - Has light furniture moved?  
☐ **Yes** | ☒ **No** - Has heavy furniture (chests, stoves, ...) vibrated?  
☐ **Yes** | ☒ **No** - Did bells tinkle?  
☐ **Yes** | ☒ **No** - Did heavy furniture move?  
☐ **Yes** | ☒ **No** - Did light furniture tip over?  
☐ **Yes** | ☒ **No** - Have doors been moved on their hinges?

### Has it been observed

- ☐ **Yes** | ☒ **No** - Falling pieces of plaster from the ceilings?  
☐ **Yes** | ☒ **No** - Cracks in wall plaster?  
☐ **Yes** | ☒ **No** - An exceptional fall of a chimney in poor condition?  
☐ **Yes** | ☒ **No** - An exceptional fall of some bricks?  
☐ **Yes** | ☒ **No** - Have there been several damaged chimneys?

How many?:

- ☐ **Yes** | ☒ **No** - Have there been several chimneys overturned?

How many?:

% for the municipality?:

- ☐ **Yes** | ☒ **No** - Have there been any falls of façade ornaments?

How important?:

- ☐ **Yes** | ☒ **No** - Have there been deep cracks in the brick walls?  
☐ **Yes** | ☒ **No** - Have there been deep cracks in the concrete walls?  
☐ **Yes** | ☒ **No** - Have there been landslides along the banks or slopes?

Importance:

ADDITIONAL COMMENTS:

## Official inquiry for SIRAULT (BE)

Location: 50.506°N 3.79°E, at 24.2 km from the epicentre.

**Imin: 2 - Imax: 2**

### Did some residents perceive

- ☒ **Yes** | ☐ **No** - Light vibrations?  
☐ **Yes** | ☒ **No** - A characteristic noise: rumbling or rolling?

### Did many residents perceive

- ☐ **Yes** | ☒ **No** - A clear shaking of the building?  
☐ **Yes** | ☒ **No** - A loud rumble?

### Have we witnessed

- ☐ **Yes** | ☒ **No** - The oscillation of chandeliers or freely suspended objects?  
☐ **Yes** | ☒ **No** - Swinging chairs or beds?  
☐ **Yes** | ☒ **No** - Cracking ceilings?  
☐ **Yes** | ☒ **No** - Sleepers waking up?

### Has it been witnessed or later observed

- ☐ **Yes** | ☒ **No** - The shivering of windows and doors?  
☐ **Yes** | ☒ **No** - The shaking of movable objects (tables, vases, knick-knacks, ...)?

### Has it been witnessed or later observed

- ☐ **Yes** | ☒ **No** - The clattering of glasses and dishes in buffets?  
☐ **Yes** | ☒ **No** - The swaying of frames hanging on the wall?  
☐ **Yes** | ☒ **No** - The creaking of floors?  
☐ **Yes** | ☒ **No** - Small fragments of plaster falling from ceilings?  
☐ **Yes** | ☒ **No** - A confusion of the inhabitants (people leaving the house).

### Has it been observed

- ☐ **Yes** | ☒ **No** - Moving knick-knacks?  
☐ **Yes** | ☒ **No** - Moving light objects?  
 Which ones?:  
☐ **Yes** | ☒ **No** - The falling of frames hanging on the wall?  
☐ **Yes** | ☒ **No** - The falling of light objects placed on polished furniture or marble  
☐ **Yes** | ☒ **No** - Cracked or broken windows?  
☐ **Yes** | ☒ **No** - Broken crockery?  
☐ **Yes** | ☒ **No** - Light objects (vases, flower pots, etc.) spilled?  
☐ **Yes** | ☒ **No** - Has light furniture moved?  
☐ **Yes** | ☒ **No** - Has heavy furniture (chests, stoves, ...) vibrated?  
☐ **Yes** | ☒ **No** - Did bells tinkle?  
☐ **Yes** | ☒ **No** - Did heavy furniture move?  
☐ **Yes** | ☒ **No** - Did light furniture tip over?  
☐ **Yes** | ☒ **No** - Have doors been moved on their hinges?

### Has it been observed

- ☐ **Yes** | ☒ **No** - Falling pieces of plaster from the ceilings?  
☐ **Yes** | ☒ **No** - Cracks in wall plaster?  
☐ **Yes** | ☒ **No** - An exceptional fall of a chimney in poor condition?  
☐ **Yes** | ☒ **No** - An exceptional fall of some bricks?  
☐ **Yes** | ☒ **No** - Have there been several damaged chimneys?

How many?:

- ☐ **Yes** | ☒ **No** - Have there been several chimneys overturned?

How many?:

% for the municipality?:

- ☐ **Yes** | ☒ **No** - Have there been any falls of façade ornaments?

How important?:

- ☐ **Yes** | ☒ **No** - Have there been deep cracks in the brick walls?  
☐ **Yes** | ☒ **No** - Have there been deep cracks in the concrete walls?  
☐ **Yes** | ☒ **No** - Have there been landslides along the banks or slopes?

Importance:

ADDITIONAL COMMENTS:

## Official inquiry for SOIGNIES (BE)

Location: 50.586°N 4.072°E, at 15.5 km from the epicentre.

**Imin: 2 - Imax: 2**

### Did some residents perceive

- ☒ **Yes** | ☐ **No** - Light vibrations?  
☐ **Yes** | ☒ **No** - A characteristic noise: rumbling or rolling?

### Did many residents perceive

- ☐ **Yes** | ☒ **No** - A clear shaking of the building?  
☐ **Yes** | ☒ **No** - A loud rumble?

### Have we witnessed

- ☐ **Yes** | ☒ **No** - The oscillation of chandeliers or freely suspended objects?  
☐ **Yes** | ☒ **No** - Swinging chairs or beds?  
☐ **Yes** | ☒ **No** - Cracking ceilings?  
☐ **Yes** | ☒ **No** - Sleepers waking up?

### Has it been witnessed or later observed

- ☐ **Yes** | ☒ **No** - The shivering of windows and doors?  
☐ **Yes** | ☒ **No** - The shaking of movable objects (tables, vases, knick-knacks, ...)?

### Has it been witnessed or later observed

- ☐ **Yes** | ☒ **No** - The clattering of glasses and dishes in buffets?  
☐ **Yes** | ☒ **No** - The swaying of frames hanging on the wall?  
☐ **Yes** | ☒ **No** - The creaking of floors?  
☐ **Yes** | ☒ **No** - Small fragments of plaster falling from ceilings?  
☐ **Yes** | ☒ **No** - A confusion of the inhabitants (people leaving the house).

### Has it been observed

- ☐ **Yes** | ☒ **No** - Moving knick-knacks?  
☐ **Yes** | ☒ **No** - Moving light objects?  
 Which ones?:  
☐ **Yes** | ☒ **No** - The falling of frames hanging on the wall?  
☐ **Yes** | ☒ **No** - The falling of light objects placed on polished furniture or marble  
☐ **Yes** | ☒ **No** - Cracked or broken windows?  
☐ **Yes** | ☒ **No** - Broken crockery?  
☐ **Yes** | ☒ **No** - Light objects (vases, flower pots, etc.) spilled?  
☐ **Yes** | ☒ **No** - Has light furniture moved?  
☐ **Yes** | ☒ **No** - Has heavy furniture (chests, stoves, ...) vibrated?  
☐ **Yes** | ☒ **No** - Did bells tinkle?  
☐ **Yes** | ☒ **No** - Did heavy furniture move?  
☐ **Yes** | ☒ **No** - Did light furniture tip over?  
☐ **Yes** | ☒ **No** - Have doors been moved on their hinges?

### Has it been observed

- ☐ **Yes** | ☒ **No** - Falling pieces of plaster from the ceilings?  
☐ **Yes** | ☒ **No** - Cracks in wall plaster?  
☐ **Yes** | ☒ **No** - An exceptional fall of a chimney in poor condition?  
☐ **Yes** | ☒ **No** - An exceptional fall of some bricks?  
☐ **Yes** | ☒ **No** - Have there been several damaged chimneys?

How many?:

- ☐ **Yes** | ☒ **No** - Have there been several chimneys overturned?

How many?:

% for the municipality?:

- ☐ **Yes** | ☒ **No** - Have there been any falls of façade ornaments?

How important?:

- ☐ **Yes** | ☒ **No** - Have there been deep cracks in the brick walls?  
☐ **Yes** | ☒ **No** - Have there been deep cracks in the concrete walls?  
☐ **Yes** | ☒ **No** - Have there been landslides along the banks or slopes?

Importance:

ADDITIONAL COMMENTS:

## Official inquiry for SPIENNES (BE)

Location: 50.426°N 3.988°E, at 9.8 km from the epicentre.

**Imin: 4 - Imax: 4**

### Did some residents perceive

- ☒ **Yes** | ☐ No - Light vibrations?  
☒ **Yes** | ☐ No - A characteristic noise: rumbling or rolling?

### Did many residents perceive

- ☒ **Yes** | ☐ No - A clear shaking of the building?  
☒ **Yes** | ☐ No - A loud rumble?

### Have we witnessed

- ☒ **Yes** | ☐ No - The oscillation of chandeliers or freely suspended objects?  
☐ Yes | ☒ **No** - Swinging chairs or beds?  
☐ Yes | ☒ **No** - Cracking ceilings?  
☐ Yes | ☒ **No** - Sleepers waking up?

### Has it been witnessed or later observed

- ☒ **Yes** | ☐ No - The shivering of windows and doors?  
☒ **Yes** | ☐ No - The shaking of movable objects (tables, vases, knick-knacks, ...)?

### Has it been witnessed or later observed

- ☒ **Yes** | ☐ No - The clattering of glasses and dishes in buffets?  
☒ **Yes** | ☐ No - The swaying of frames hanging on the wall?  
☐ Yes | ☒ **No** - The creaking of floors?  
☐ Yes | ☒ **No** - Small fragments of plaster falling from ceilings?  
☒ **Yes** | ☐ No - A confusion of the inhabitants (people leaving the house).

### Has it been observed

- ☐ Yes | ☒ **No** - Moving knick-knacks?  
☐ Yes | ☒ **No** - Moving light objects?  
 Which ones?:  
☐ Yes | ☒ **No** - The falling of frames hanging on the wall?  
☐ Yes | ☒ **No** - The falling of light objects placed on polished furniture or marble  
☐ Yes | ☒ **No** - Cracked or broken windows?  
☐ Yes | ☒ **No** - Broken crockery?  
☐ Yes | ☒ **No** - Light objects (vases, flower pots, etc.) spilled?  
☐ Yes | ☒ **No** - Has light furniture moved?  
☐ Yes | ☒ **No** - Has heavy furniture (chests, stoves, ...) vibrated?  
☐ Yes | ☒ **No** - Did bells tinkle?  
☐ Yes | ☒ **No** - Did heavy furniture move?  
☐ Yes | ☒ **No** - Did light furniture tip over?  
☐ Yes | ☒ **No** - Have doors been moved on their hinges?

### Has it been observed

- ☐ Yes | ☒ **No** - Falling pieces of plaster from the ceilings?  
☐ Yes | ☒ **No** - Cracks in wall plaster?  
☐ Yes | ☒ **No** - An exceptional fall of a chimney in poor condition?  
☐ Yes | ☒ **No** - An exceptional fall of some bricks?  
☐ Yes | ☒ **No** - Have there been several damaged chimneys?

How many?:

- ☐ Yes | ☒ **No** - Have there been several chimneys overturned?

How many?:

% for the municipality?:

- ☐ Yes | ☒ **No** - Have there been any falls of façade ornaments?

How important?:

- ☐ Yes | ☒ **No** - Have there been deep cracks in the brick walls?  
☐ Yes | ☒ **No** - Have there been deep cracks in the concrete walls?  
☐ Yes | ☒ **No** - Have there been landslides along the banks or slopes?

Importance:

ADDITIONAL COMMENTS:

## Official inquiry for STEENKERQUE (BE)

Location: 50.643°N 4.07°E, at 21.8 km from the epicentre.

**Imin: 3 - Imax: 4**

### Did some residents perceive

- ☒ **Yes** | ☐ No - Light vibrations?  
☒ **Yes** | ☐ No - A characteristic noise: rumbling or rolling?

### Did many residents perceive

- ☐ Yes | ☒ **No** - A clear shaking of the building?  
☐ Yes | ☒ **No** - A loud rumble?

### Have we witnessed

- ☒ **Yes** | ☐ No - The oscillation of chandeliers or freely suspended objects?  
☐ Yes | ☒ **No** - Swinging chairs or beds?  
☐ Yes | ☒ **No** - Cracking ceilings?  
☐ Yes | ☒ **No** - Sleepers waking up?

### Has it been witnessed or later observed

- ☐ Yes | ☒ **No** - The shivering of windows and doors?  
☒ **Yes** | ☐ No - The shaking of movable objects (tables, vases, knick-knacks, ...)?

### Has it been witnessed or later observed

- ☒ **Yes** | ☐ No - The clattering of glasses and dishes in buffets?  
☐ Yes | ☒ **No** - The swaying of frames hanging on the wall?  
☐ Yes | ☒ **No** - The creaking of floors?  
☐ Yes | ☒ **No** - Small fragments of plaster falling from ceilings?  
☐ Yes | ☒ **No** - A confusion of the inhabitants (people leaving the house).

### Has it been observed

- ☐ Yes | ☒ **No** - Moving knick-knacks?  
☐ Yes | ☒ **No** - Moving light objects?  
 Which ones?:  
☐ Yes | ☒ **No** - The falling of frames hanging on the wall?  
☐ Yes | ☒ **No** - The falling of light objects placed on polished furniture or marble  
☐ Yes | ☒ **No** - Cracked or broken windows?  
☐ Yes | ☒ **No** - Broken crockery?  
☐ Yes | ☒ **No** - Light objects (vases, flower pots, etc.) spilled?  
☐ Yes | ☒ **No** - Has light furniture moved?  
☐ Yes | ☒ **No** - Has heavy furniture (chests, stoves, ...) vibrated?  
☐ Yes | ☒ **No** - Did bells tinkle?  
☐ Yes | ☒ **No** - Did heavy furniture move?  
☐ Yes | ☒ **No** - Did light furniture tip over?  
☐ Yes | ☒ **No** - Have doors been moved on their hinges?

### Has it been observed

- ☐ Yes | ☒ **No** - Falling pieces of plaster from the ceilings?  
☐ Yes | ☒ **No** - Cracks in wall plaster?  
☐ Yes | ☒ **No** - An exceptional fall of a chimney in poor condition?  
☐ Yes | ☒ **No** - An exceptional fall of some bricks?  
☐ Yes | ☒ **No** - Have there been several damaged chimneys?

How many?:

- ☐ Yes | ☒ **No** - Have there been several chimneys overturned?

How many?:

% for the municipality?:

- ☐ Yes | ☒ **No** - Have there been any falls of façade ornaments?

How important?:

- ☐ Yes | ☒ **No** - Have there been deep cracks in the brick walls?  
☐ Yes | ☒ **No** - Have there been deep cracks in the concrete walls?  
☐ Yes | ☒ **No** - Have there been landslides along the banks or slopes?

Importance:

ADDITIONAL COMMENTS:

## Official inquiry for STREPY-BRACQUEGNIES (BE)

Location: 50.475°N 4.124°E, at 2.8 km from the epicentre.

**Imin: 7 - Imax: 7**

### Did some residents perceive

- ☐ Yes | ☒ **No** - Light vibrations?  
☐ Yes | ☒ **No** - A characteristic noise: rumbling or rolling?

### Did many residents perceive

- ☒ **Yes** | ☐ No - A clear shaking of the building?  
☒ **Yes** | ☐ No - A loud rumble?

### Have we witnessed

- ☒ **Yes** | ☐ No - The oscillation of chandeliers or freely suspended objects?  
☒ **Yes** | ☐ No - Swinging chairs or beds?  
☒ **Yes** | ☐ No - Cracking ceilings?  
☒ **Yes** | ☐ No - Sleepers waking up?

### Has it been witnessed or later observed

- ☒ **Yes** | ☐ No - The shivering of windows and doors?  
☒ **Yes** | ☐ No - The shaking of movable objects (tables, vases, knick-knacks, ...)?

### Has it been witnessed or later observed

- ☒ **Yes** | ☐ No - The clattering of glasses and dishes in buffets?  
☒ **Yes** | ☐ No - The swaying of frames hanging on the wall?  
☒ **Yes** | ☐ No - The creaking of floors?  
☒ **Yes** | ☐ No - Small fragments of plaster falling from ceilings?  
☒ **Yes** | ☐ No - A confusion of the inhabitants (people leaving the house).

### Has it been observed

- ☒ **Yes** | ☐ No - Moving knick-knacks?  
☐ Yes | ☒ **No** - Moving light objects?  
 Which ones?:  
☐ Yes | ☒ **No** - The falling of frames hanging on the wall?  
☐ Yes | ☒ **No** - The falling of light objects placed on polished furniture or marble  
☒ **Yes** | ☐ No - Cracked or broken windows?  
☐ Yes | ☒ **No** - Broken crockery?  
☒ **Yes** | ☐ No - Light objects (vases, flower pots, etc.) spilled?  
☐ Yes | ☒ **No** - Has light furniture moved?  
☐ Yes | ☒ **No** - Has heavy furniture (chests, stoves, ...) vibrated?  
☐ Yes | ☒ **No** - Did bells tinkle?  
☐ Yes | ☒ **No** - Did heavy furniture move?  
☐ Yes | ☒ **No** - Did light furniture tip over?  
☐ Yes | ☒ **No** - Have doors been moved on their hinges?

### Has it been observed

- ☒ **Yes** | ☐ No - Falling pieces of plaster from the ceilings?  
☒ **Yes** | ☐ No - Cracks in wall plaster?  
☐ Yes | ☒ **No** - An exceptional fall of a chimney in poor condition?  
☐ Yes | ☒ **No** - An exceptional fall of some bricks?  
☒ **Yes** | ☐ No - Have there been several damaged chimneys?

How many?: **230**

- ☒ **Yes** | ☐ No - Have there been several chimneys overturned?

How many?: **122**

% for the municipality?: **3%**

- ☐ Yes | ☒ **No** - Have there been any falls of façade ornaments?

How important?:

- ☐ Yes | ☒ **No** - Have there been deep cracks in the brick walls?  
☐ Yes | ☒ **No** - Have there been deep cracks in the concrete walls?  
☐ Yes | ☒ **No** - Have there been landslides along the banks or slopes?

Importance:

ADDITIONAL COMMENTS:

## Official inquiry for THIEU (BE)

Location: 50.473°N 4.093°E, at 3.2 km from the epicentre.

**Imin: 5 - Imax: 5**

### Did some residents perceive

- ☐ Yes | ☒ **No** - Light vibrations?  
☒ **Yes** | ☐ No - A characteristic noise: rumbling or rolling?

### Did many residents perceive

- ☒ **Yes** | ☐ No - A clear shaking of the building?  
☒ **Yes** | ☐ No - A loud rumble?

### Have we witnessed

- ☒ **Yes** | ☐ No - The oscillation of chandeliers or freely suspended objects?  
☐ Yes | ☒ **No** - Swinging chairs or beds?  
☐ Yes | ☒ **No** - Cracking ceilings?  
☐ Yes | ☒ **No** - Sleepers waking up?

### Has it been witnessed or later observed

- ☒ **Yes** | ☐ No - The shivering of windows and doors?  
☒ **Yes** | ☐ No - The shaking of movable objects (tables, vases, knick-knacks, ...)?

### Has it been witnessed or later observed

- ☒ **Yes** | ☐ No - The clattering of glasses and dishes in buffets?  
☐ Yes | ☒ **No** - The swaying of frames hanging on the wall?  
☐ Yes | ☒ **No** - The creaking of floors?  
☐ Yes | ☒ **No** - Small fragments of plaster falling from ceilings?  
☒ **Yes** | ☐ No - A confusion of the inhabitants (people leaving the house).

### Has it been observed

- ☒ **Yes** | ☐ No - Moving knick-knacks?  
☐ Yes | ☒ **No** - Moving light objects?

Which ones?:

- ☐ Yes | ☒ **No** - The falling of frames hanging on the wall?  
☐ Yes | ☒ **No** - The falling of light objects placed on polished furniture or marble  
☐ Yes | ☒ **No** - Cracked or broken windows?  
☐ Yes | ☒ **No** - Broken crockery?  
☐ Yes | ☒ **No** - Light objects (vases, flower pots, etc.) spilled?  
☐ Yes | ☒ **No** - Has light furniture moved?  
☐ Yes | ☒ **No** - Has heavy furniture (chests, stoves, ...) vibrated?  
☐ Yes | ☒ **No** - Did bells tinkle?  
☐ Yes | ☒ **No** - Did heavy furniture move?  
☐ Yes | ☒ **No** - Did light furniture tip over?  
☐ Yes | ☒ **No** - Have doors been moved on their hinges?

### Has it been observed

- ☐ Yes | ☒ **No** - Falling pieces of plaster from the ceilings?  
☐ Yes | ☒ **No** - Cracks in wall plaster?  
☒ **Yes** | ☐ No - An exceptional fall of a chimney in poor condition?  
☒ **Yes** | ☐ No - An exceptional fall of some bricks?  
☒ **Yes** | ☐ No - Have there been several damaged chimneys?

How many?: **une dizaine**

- ☐ Yes | ☒ **No** - Have there been several chimneys overturned?

How many?:

% for the municipality?:

- ☐ Yes | ☒ **No** - Have there been any falls of façade ornaments?

How important?:

- ☐ Yes | ☒ **No** - Have there been deep cracks in the brick walls?  
☐ Yes | ☒ **No** - Have there been deep cracks in the concrete walls?  
☒ **Yes** | ☐ No - Have there been landslides along the banks or slopes?

Importance:

ADDITIONAL COMMENTS: **Question 10.- Y a-t-il eu des glissements le long des berges ou des talus, importance ? : une berge du Thiriou sur 20 mètres.**

## Official inquiry for THIEUSIES (BE)

Location: 50.515°N 4.05°E, at 8.8 km from the epicentre.

**Imin: 4 - Imax: 4**

### Did some residents perceive

- ☒ **Yes** | ☐ No - Light vibrations?  
☒ **Yes** | ☐ No - A characteristic noise: rumbling or rolling?

### Did many residents perceive

- ☒ **Yes** | ☐ No - A clear shaking of the building?  
☐ Yes | ☒ **No** - A loud rumble?

### Have we witnessed

- ☒ **Yes** | ☐ No - The oscillation of chandeliers or freely suspended objects?  
☒ **Yes** | ☐ No - Swinging chairs or beds?  
☒ **Yes** | ☐ No - Cracking ceilings?  
☐ Yes | ☒ **No** - Sleepers waking up?

### Has it been witnessed or later observed

- ☒ **Yes** | ☐ No - The shivering of windows and doors?  
☒ **Yes** | ☐ No - The shaking of movable objects (tables, vases, knick-knacks, ...)?

### Has it been witnessed or later observed

- ☐ Yes | ☒ **No** - The clattering of glasses and dishes in buffets?  
☐ Yes | ☒ **No** - The swaying of frames hanging on the wall?  
☒ **Yes** | ☐ No - The creaking of floors?  
☐ Yes | ☒ **No** - Small fragments of plaster falling from ceilings?  
☒ **Yes** | ☐ No - A confusion of the inhabitants (people leaving the house).

### Has it been observed

- ☐ Yes | ☒ **No** - Moving knick-knacks?  
☐ Yes | ☒ **No** - Moving light objects?  
 Which ones?:  
☐ Yes | ☒ **No** - The falling of frames hanging on the wall?  
☐ Yes | ☒ **No** - The falling of light objects placed on polished furniture or marble  
☐ Yes | ☒ **No** - Cracked or broken windows?  
☐ Yes | ☒ **No** - Broken crockery?  
☐ Yes | ☒ **No** - Light objects (vases, flower pots, etc.) spilled?  
☐ Yes | ☒ **No** - Has light furniture moved?  
☐ Yes | ☒ **No** - Has heavy furniture (chests, stoves, ...) vibrated?  
☐ Yes | ☒ **No** - Did bells tinkle?  
☐ Yes | ☒ **No** - Did heavy furniture move?  
☐ Yes | ☒ **No** - Did light furniture tip over?  
☐ Yes | ☒ **No** - Have doors been moved on their hinges?

### Has it been observed

- ☐ Yes | ☒ **No** - Falling pieces of plaster from the ceilings?  
☐ Yes | ☒ **No** - Cracks in wall plaster?  
☐ Yes | ☒ **No** - An exceptional fall of a chimney in poor condition?  
☐ Yes | ☒ **No** - An exceptional fall of some bricks?  
☐ Yes | ☒ **No** - Have there been several damaged chimneys?

How many?:

- ☐ Yes | ☒ **No** - Have there been several chimneys overturned?

How many?:

% for the municipality?:

- ☐ Yes | ☒ **No** - Have there been any falls of façade ornaments?

How important?:

- ☐ Yes | ☒ **No** - Have there been deep cracks in the brick walls?  
☐ Yes | ☒ **No** - Have there been deep cracks in the concrete walls?  
☐ Yes | ☒ **No** - Have there been landslides along the banks or slopes?

Importance:

ADDITIONAL COMMENTS:

## Official inquiry for TRIVIERES (BE)

Location: 50.448°N 4.147°E, at 1.9 km from the epicentre.

**Imin: 6 - Imax: 6**

### Did some residents perceive

- ☐ Yes | ☒ **No** - Light vibrations?  
☐ Yes | ☒ **No** - A characteristic noise: rumbling or rolling?

### Did many residents perceive

- ☒ **Yes** | ☐ No - A clear shaking of the building?  
☒ **Yes** | ☐ No - A loud rumble?

### Have we witnessed

- ☒ **Yes** | ☐ No - The oscillation of chandeliers or freely suspended objects?  
☐ Yes | ☒ **No** - Swinging chairs or beds?  
☐ Yes | ☒ **No** - Cracking ceilings?  
☐ Yes | ☒ **No** - Sleepers waking up?

### Has it been witnessed or later observed

- ☒ **Yes** | ☐ No - The shivering of windows and doors?  
☒ **Yes** | ☐ No - The shaking of movable objects (tables, vases, knick-knacks, ...)?

### Has it been witnessed or later observed

- ☒ **Yes** | ☐ No - The clattering of glasses and dishes in buffets?  
☒ **Yes** | ☐ No - The swaying of frames hanging on the wall?  
☐ Yes | ☒ **No** - The creaking of floors?  
☒ **Yes** | ☐ No - Small fragments of plaster falling from ceilings?  
☒ **Yes** | ☐ No - A confusion of the inhabitants (people leaving the house).

### Has it been observed

- ☒ **Yes** | ☐ No - Moving knick-knacks?  
☒ **Yes** | ☐ No - Moving light objects?  
 Which ones?: **des poupées de collection renversé dans une vitrine.**  
☒ **Yes** | ☐ No - The falling of frames hanging on the wall?  
☐ Yes | ☒ **No** - The falling of light objects placed on polished furniture or marble  
☒ **Yes** | ☐ No - Cracked or broken windows?  
☐ Yes | ☒ **No** - Broken crockery?  
☐ Yes | ☒ **No** - Light objects (vases, flower pots, etc.) spilled?  
☐ Yes | ☒ **No** - Has light furniture moved?  
☐ Yes | ☒ **No** - Has heavy furniture (chests, stoves, ...) vibrated?  
☐ Yes | ☒ **No** - Did bells tinkle?  
☐ Yes | ☒ **No** - Did heavy furniture move?  
☐ Yes | ☒ **No** - Did light furniture tip over?  
☐ Yes | ☒ **No** - Have doors been moved on their hinges?

### Has it been observed

- ☒ **Yes** | ☐ No - Falling pieces of plaster from the ceilings?  
☐ Yes | ☒ **No** - Cracks in wall plaster?  
☒ **Yes** | ☐ No - An exceptional fall of a chimney in poor condition?  
☐ Yes | ☒ **No** - An exceptional fall of some bricks?  
☒ **Yes** | ☐ No - Have there been several damaged chimneys?

How many?:

- ☒ **Yes** | ☐ No - Have there been several chimneys overturned?

How many?: **2%**

% for the municipality?:

- ☐ Yes | ☒ **No** - Have there been any falls of façade ornaments?

How important?:

- ☐ Yes | ☒ **No** - Have there been deep cracks in the brick walls?  
☒ **Yes** | ☐ No - Have there been deep cracks in the concrete walls?  
☐ Yes | ☒ **No** - Have there been landslides along the banks or slopes?

Importance:

ADDITIONAL COMMENTS:

## Official inquiry for TUBIZE (BE)

Location: 50.695°N 4.206°E, at 27.9 km from the epicentre.

**Imin: 2 - Imax: 2**

### Did some residents perceive

- ☒ **Yes** | ☐ No - Light vibrations?  
☒ **Yes** | ☐ No - A characteristic noise: rumbling or rolling?

### Did many residents perceive

- ☐ Yes | ☒ **No** - A clear shaking of the building?  
☐ Yes | ☒ **No** - A loud rumble?

### Have we witnessed

- ☐ Yes | ☒ **No** - The oscillation of chandeliers or freely suspended objects?  
☐ Yes | ☒ **No** - Swinging chairs or beds?  
☐ Yes | ☒ **No** - Cracking ceilings?  
☐ Yes | ☒ **No** - Sleepers waking up?

### Has it been witnessed or later observed

- ☐ Yes | ☒ **No** - The shivering of windows and doors?  
☐ Yes | ☒ **No** - The shaking of movable objects (tables, vases, knick-knacks, ...)?

### Has it been witnessed or later observed

- ☐ Yes | ☒ **No** - The clattering of glasses and dishes in buffets?  
☐ Yes | ☒ **No** - The swaying of frames hanging on the wall?  
☐ Yes | ☒ **No** - The creaking of floors?  
☐ Yes | ☒ **No** - Small fragments of plaster falling from ceilings?  
☐ Yes | ☒ **No** - A confusion of the inhabitants (people leaving the house).

### Has it been observed

- ☐ Yes | ☒ **No** - Moving knick-knacks?  
☐ Yes | ☒ **No** - Moving light objects?  
 Which ones?:  
☐ Yes | ☒ **No** - The falling of frames hanging on the wall?  
☐ Yes | ☒ **No** - The falling of light objects placed on polished furniture or marble  
☐ Yes | ☒ **No** - Cracked or broken windows?  
☐ Yes | ☒ **No** - Broken crockery?  
☐ Yes | ☒ **No** - Light objects (vases, flower pots, etc.) spilled?  
☐ Yes | ☒ **No** - Has light furniture moved?  
☐ Yes | ☒ **No** - Has heavy furniture (chests, stoves, ...) vibrated?  
☐ Yes | ☒ **No** - Did bells tinkle?  
☐ Yes | ☒ **No** - Did heavy furniture move?  
☐ Yes | ☒ **No** - Did light furniture tip over?  
☐ Yes | ☒ **No** - Have doors been moved on their hinges?

### Has it been observed

- ☐ Yes | ☒ **No** - Falling pieces of plaster from the ceilings?  
☐ Yes | ☒ **No** - Cracks in wall plaster?  
☐ Yes | ☒ **No** - An exceptional fall of a chimney in poor condition?  
☐ Yes | ☒ **No** - An exceptional fall of some bricks?  
☐ Yes | ☒ **No** - Have there been several damaged chimneys?

How many?:

- ☐ Yes | ☒ **No** - Have there been several chimneys overturned?

How many?:

% for the municipality?:

- ☐ Yes | ☒ **No** - Have there been any falls of façade ornaments?

How important?:

- ☐ Yes | ☒ **No** - Have there been deep cracks in the brick walls?  
☐ Yes | ☒ **No** - Have there been deep cracks in the concrete walls?  
☐ Yes | ☒ **No** - Have there been landslides along the banks or slopes?

Importance:

ADDITIONAL COMMENTS:

## Official inquiry for VELLEREILLE-LE-SEC (BE)

Location: 50.402°N 4.058°E, at 6.9 km from the epicentre.

**Imin: 2 - Imax: 2**

### Did some residents perceive

- ☐ Yes | ☒ **No** - Light vibrations?  
☒ **Yes** | ☐ No - A characteristic noise: rumbling or rolling?

### Did many residents perceive

- ☐ Yes | ☒ **No** - A clear shaking of the building?  
☐ Yes | ☒ **No** - A loud rumble?

### Have we witnessed

- ☐ Yes | ☒ **No** - The oscillation of chandeliers or freely suspended objects?  
☐ Yes | ☒ **No** - Swinging chairs or beds?  
☐ Yes | ☒ **No** - Cracking ceilings?  
☐ Yes | ☒ **No** - Sleepers waking up?

### Has it been witnessed or later observed

- ☐ Yes | ☒ **No** - The shivering of windows and doors?  
☐ Yes | ☒ **No** - The shaking of movable objects (tables, vases, knick-knacks, ...)?

### Has it been witnessed or later observed

- ☐ Yes | ☒ **No** - The clattering of glasses and dishes in buffets?  
☐ Yes | ☒ **No** - The swaying of frames hanging on the wall?  
☐ Yes | ☒ **No** - The creaking of floors?  
☐ Yes | ☒ **No** - Small fragments of plaster falling from ceilings?  
☐ Yes | ☒ **No** - A confusion of the inhabitants (people leaving the house).

### Has it been observed

- ☐ Yes | ☒ **No** - Moving knick-knacks?  
☐ Yes | ☒ **No** - Moving light objects?

Which ones?:

- ☐ Yes | ☒ **No** - The falling of frames hanging on the wall?  
☐ Yes | ☒ **No** - The falling of light objects placed on polished furniture or marble  
☐ Yes | ☒ **No** - Cracked or broken windows?  
☐ Yes | ☒ **No** - Broken crockery?  
☐ Yes | ☒ **No** - Light objects (vases, flower pots, etc.) spilled?  
☐ Yes | ☒ **No** - Has light furniture moved?  
☐ Yes | ☒ **No** - Has heavy furniture (chests, stoves, ...) vibrated?  
☐ Yes | ☒ **No** - Did bells tinkle?  
☐ Yes | ☒ **No** - Did heavy furniture move?  
☐ Yes | ☒ **No** - Did light furniture tip over?  
☐ Yes | ☒ **No** - Have doors been moved on their hinges?

### Has it been observed

- ☐ Yes | ☒ **No** - Falling pieces of plaster from the ceilings?  
☐ Yes | ☒ **No** - Cracks in wall plaster?  
☐ Yes | ☒ **No** - An exceptional fall of a chimney in poor condition?  
☐ Yes | ☒ **No** - An exceptional fall of some bricks?  
☐ Yes | ☒ **No** - Have there been several damaged chimneys?

How many?:

- ☐ Yes | ☒ **No** - Have there been several chimneys overturned?

How many?:

% for the municipality?:

- ☐ Yes | ☒ **No** - Have there been any falls of façade ornaments?

How important?:

- ☐ Yes | ☒ **No** - Have there been deep cracks in the brick walls?  
☐ Yes | ☒ **No** - Have there been deep cracks in the concrete walls?  
☐ Yes | ☒ **No** - Have there been landslides along the banks or slopes?

Importance:

ADDITIONAL COMMENTS:

## Official inquiry for VELLEREILLE-LES-BRAYEUX (BE)

Location: 50.38°N 4.152°E, at 8.1 km from the epicentre.

Imin: 5 - Imax: 5

### Did some residents perceive

- ☒ **Yes** | ☐ No - Light vibrations?  
☒ **Yes** | ☐ No - A characteristic noise: rumbling or rolling?

### Did many residents perceive

- ☒ **Yes** | ☐ No - A clear shaking of the building?  
☒ **Yes** | ☐ No - A loud rumble?

### Have we witnessed

- ☒ **Yes** | ☐ No - The oscillation of chandeliers or freely suspended objects?  
☒ **Yes** | ☐ No - Swinging chairs or beds?  
☒ **Yes** | ☐ No - Cracking ceilings?  
☐ Yes | ☒ **No** - Sleepers waking up?

### Has it been witnessed or later observed

- ☒ **Yes** | ☐ No - The shivering of windows and doors?  
☒ **Yes** | ☐ No - The shaking of movable objects (tables, vases, knick-knacks, ...)?

### Has it been witnessed or later observed

- ☒ **Yes** | ☐ No - The clattering of glasses and dishes in buffets?  
☒ **Yes** | ☐ No - The swaying of frames hanging on the wall?  
☒ **Yes** | ☐ No - The creaking of floors?  
☒ **Yes** | ☐ No - Small fragments of plaster falling from ceilings?  
☒ **Yes** | ☐ No - A confusion of the inhabitants (people leaving the house).

### Has it been observed

- ☒ **Yes** | ☐ No - Moving knick-knacks?  
☒ **Yes** | ☐ No - Moving light objects?  
 Which ones?: **vases sur cheminées.**  
☐ Yes | ☒ **No** - The falling of frames hanging on the wall?  
☒ **Yes** | ☐ No - The falling of light objects placed on polished furniture or marble  
☐ Yes | ☒ **No** - Cracked or broken windows?  
☐ Yes | ☒ **No** - Broken crockery?  
☒ **Yes** | ☐ No - Light objects (vases, flower pots, etc.) spilled?  
☐ Yes | ☒ **No** - Has light furniture moved?  
☒ **Yes** | ☐ No - Has heavy furniture (chests, stoves, ...) vibrated?  
☐ Yes | ☒ **No** - Did bells tinkle?  
☐ Yes | ☒ **No** - Did heavy furniture move?  
☐ Yes | ☒ **No** - Did light furniture tip over?  
☐ Yes | ☒ **No** - Have doors been moved on their hinges?

### Has it been observed

- ☒ **Yes** | ☐ No - Falling pieces of plaster from the ceilings?  
☐ Yes | ☒ **No** - Cracks in wall plaster?  
☐ Yes | ☒ **No** - An exceptional fall of a chimney in poor condition?  
☐ Yes | ☒ **No** - An exceptional fall of some bricks?  
☐ Yes | ☒ **No** - Have there been several damaged chimneys?

How many?:

- ☐ Yes | ☒ **No** - Have there been several chimneys overturned?

How many?:

% for the municipality?:

- ☐ Yes | ☒ **No** - Have there been any falls of façade ornaments?

How important?:

- ☐ Yes | ☒ **No** - Have there been deep cracks in the brick walls?  
☐ Yes | ☒ **No** - Have there been deep cracks in the concrete walls?  
☐ Yes | ☒ **No** - Have there been landslides along the banks or slopes?

Importance:

ADDITIONAL COMMENTS:

## Official inquiry for VIESVILLE (BE)

Location: 50.492°N 4.408°E, at 20.9 km from the epicentre.

**Imin: 3 - Imax: 3**

### Did some residents perceive

- ☒ **Yes** | ☐ **No** - Light vibrations?  
☐ **Yes** | ☒ **No** - A characteristic noise: rumbling or rolling?

### Did many residents perceive

- ☐ **Yes** | ☒ **No** - A clear shaking of the building?  
☐ **Yes** | ☒ **No** - A loud rumble?

### Have we witnessed

- ☒ **Yes** | ☐ **No** - The oscillation of chandeliers or freely suspended objects?  
☐ **Yes** | ☒ **No** - Swinging chairs or beds?  
☐ **Yes** | ☒ **No** - Cracking ceilings?  
☐ **Yes** | ☒ **No** - Sleepers waking up?

### Has it been witnessed or later observed

- ☐ **Yes** | ☒ **No** - The shivering of windows and doors?  
☐ **Yes** | ☒ **No** - The shaking of movable objects (tables, vases, knick-knacks, ...)?

### Has it been witnessed or later observed

- ☐ **Yes** | ☒ **No** - The clattering of glasses and dishes in buffets?  
☐ **Yes** | ☒ **No** - The swaying of frames hanging on the wall?  
☐ **Yes** | ☒ **No** - The creaking of floors?  
☐ **Yes** | ☒ **No** - Small fragments of plaster falling from ceilings?  
☐ **Yes** | ☒ **No** - A confusion of the inhabitants (people leaving the house).

### Has it been observed

- ☐ **Yes** | ☒ **No** - Moving knick-knacks?  
☐ **Yes** | ☒ **No** - Moving light objects?

Which ones?:

- ☐ **Yes** | ☒ **No** - The falling of frames hanging on the wall?  
☐ **Yes** | ☒ **No** - The falling of light objects placed on polished furniture or marble  
☐ **Yes** | ☒ **No** - Cracked or broken windows?  
☐ **Yes** | ☒ **No** - Broken crockery?  
☐ **Yes** | ☒ **No** - Light objects (vases, flower pots, etc.) spilled?  
☐ **Yes** | ☒ **No** - Has light furniture moved?  
☐ **Yes** | ☒ **No** - Has heavy furniture (chests, stoves, ...) vibrated?  
☐ **Yes** | ☒ **No** - Did bells tinkle?  
☐ **Yes** | ☒ **No** - Did heavy furniture move?  
☐ **Yes** | ☒ **No** - Did light furniture tip over?  
☐ **Yes** | ☒ **No** - Have doors been moved on their hinges?

### Has it been observed

- ☐ **Yes** | ☒ **No** - Falling pieces of plaster from the ceilings?  
☐ **Yes** | ☒ **No** - Cracks in wall plaster?  
☐ **Yes** | ☒ **No** - An exceptional fall of a chimney in poor condition?  
☐ **Yes** | ☒ **No** - An exceptional fall of some bricks?  
☐ **Yes** | ☒ **No** - Have there been several damaged chimneys?

How many?:

- ☐ **Yes** | ☒ **No** - Have there been several chimneys overturned?

How many?:

% for the municipality?:

- ☐ **Yes** | ☒ **No** - Have there been any falls of façade ornaments?

How important?:

- ☐ **Yes** | ☒ **No** - Have there been deep cracks in the brick walls?  
☐ **Yes** | ☒ **No** - Have there been deep cracks in the concrete walls?  
☐ **Yes** | ☒ **No** - Have there been landslides along the banks or slopes?

Importance:

ADDITIONAL COMMENTS:

## Official inquiry for VIEUX-GENAPPE (BE)

Location: 50.61°N 4.442°E, at 29.0 km from the epicentre.

**Imin: 2 - Imax: 2**

### Did some residents perceive

☒ **Yes** | ☐ **No** - Light vibrations?

☒ **Yes** | ☐ **No** - A characteristic noise: rumbling or rolling?

### Did many residents perceive

☐ **Yes** | ☒ **No** - A clear shaking of the building?

☐ **Yes** | ☒ **No** - A loud rumble?

### Have we witnessed

☐ **Yes** | ☒ **No** - The oscillation of chandeliers or freely suspended objects?

☐ **Yes** | ☒ **No** - Swinging chairs or beds?

☐ **Yes** | ☒ **No** - Cracking ceilings?

☐ **Yes** | ☒ **No** - Sleepers waking up?

### Has it been witnessed or later observed

☐ **Yes** | ☒ **No** - The shivering of windows and doors?

☐ **Yes** | ☒ **No** - The shaking of movable objects (tables, vases, knick-knacks, ...)?

### Has it been witnessed or later observed

☐ **Yes** | ☒ **No** - The clattering of glasses and dishes in buffets?

☐ **Yes** | ☒ **No** - The swaying of frames hanging on the wall?

☐ **Yes** | ☒ **No** - The creaking of floors?

☐ **Yes** | ☒ **No** - Small fragments of plaster falling from ceilings?

☐ **Yes** | ☒ **No** - A confusion of the inhabitants (people leaving the house).

### Has it been observed

☐ **Yes** | ☒ **No** - Moving knick-knacks?

☐ **Yes** | ☒ **No** - Moving light objects?

Which ones?:

☐ **Yes** | ☒ **No** - The falling of frames hanging on the wall?

☐ **Yes** | ☒ **No** - The falling of light objects placed on polished furniture or marble

☐ **Yes** | ☒ **No** - Cracked or broken windows?

☐ **Yes** | ☒ **No** - Broken crockery?

☐ **Yes** | ☒ **No** - Light objects (vases, flower pots, etc.) spilled?

☐ **Yes** | ☒ **No** - Has light furniture moved?

☐ **Yes** | ☒ **No** - Has heavy furniture (chests, stoves, ...) vibrated?

☐ **Yes** | ☒ **No** - Did bells tinkle?

☐ **Yes** | ☒ **No** - Did heavy furniture move?

☐ **Yes** | ☒ **No** - Did light furniture tip over?

☐ **Yes** | ☒ **No** - Have doors been moved on their hinges?

### Has it been observed

☐ **Yes** | ☒ **No** - Falling pieces of plaster from the ceilings?

☐ **Yes** | ☒ **No** - Cracks in wall plaster?

☐ **Yes** | ☒ **No** - An exceptional fall of a chimney in poor condition?

☐ **Yes** | ☒ **No** - An exceptional fall of some bricks?

☐ **Yes** | ☒ **No** - Have there been several damaged chimneys?

How many?:

☐ **Yes** | ☒ **No** - Have there been several chimneys overturned?

How many?:

% for the municipality?:

☐ **Yes** | ☒ **No** - Have there been any falls of façade ornaments?

How important?:

☐ **Yes** | ☒ **No** - Have there been deep cracks in the brick walls?

☐ **Yes** | ☒ **No** - Have there been deep cracks in the concrete walls?

☐ **Yes** | ☒ **No** - Have there been landslides along the banks or slopes?

Importance:

ADDITIONAL COMMENTS:

## Official inquiry for VILLE-SUR-HAINE (BE)

Location: 50.479°N 4.061°E, at 5.3 km from the epicentre.

**Imin: 5 - Imax: 5**

### Did some residents perceive

- ☐ Yes | ☒ **No** - Light vibrations?  
☐ Yes | ☒ **No** - A characteristic noise: rumbling or rolling?

### Did many residents perceive

- ☐ Yes | ☒ **No** - A clear shaking of the building?  
☒ **Yes** | ☐ No - A loud rumble?

### Have we witnessed

- ☒ **Yes** | ☐ No - The oscillation of chandeliers or freely suspended objects?  
☐ Yes | ☒ **No** - Swinging chairs or beds?  
☐ Yes | ☒ **No** - Cracking ceilings?  
☐ Yes | ☒ **No** - Sleepers waking up?

### Has it been witnessed or later observed

- ☒ **Yes** | ☐ No - The shivering of windows and doors?  
☒ **Yes** | ☐ No - The shaking of movable objects (tables, vases, knick-knacks, ...)?

### Has it been witnessed or later observed

- ☒ **Yes** | ☐ No - The clattering of glasses and dishes in buffets?  
☒ **Yes** | ☐ No - The swaying of frames hanging on the wall?  
☐ Yes | ☒ **No** - The creaking of floors?  
☐ Yes | ☒ **No** - Small fragments of plaster falling from ceilings?  
☒ **Yes** | ☐ No - A confusion of the inhabitants (people leaving the house).

### Has it been observed

- ☐ Yes | ☒ **No** - Moving knick-knacks?  
☐ Yes | ☒ **No** - Moving light objects?  
 Which ones?:  
☐ Yes | ☒ **No** - The falling of frames hanging on the wall?  
☐ Yes | ☒ **No** - The falling of light objects placed on polished furniture or marble  
☐ Yes | ☒ **No** - Cracked or broken windows?  
☐ Yes | ☒ **No** - Broken crockery?  
☐ Yes | ☒ **No** - Light objects (vases, flower pots, etc.) spilled?  
☐ Yes | ☒ **No** - Has light furniture moved?  
☐ Yes | ☒ **No** - Has heavy furniture (chests, stoves, ...) vibrated?  
☐ Yes | ☒ **No** - Did bells tinkle?  
☐ Yes | ☒ **No** - Did heavy furniture move?  
☐ Yes | ☒ **No** - Did light furniture tip over?  
☐ Yes | ☒ **No** - Have doors been moved on their hinges?

### Has it been observed

- ☐ Yes | ☒ **No** - Falling pieces of plaster from the ceilings?  
☒ **Yes** | ☐ No - Cracks in wall plaster?  
☐ Yes | ☒ **No** - An exceptional fall of a chimney in poor condition?  
☐ Yes | ☒ **No** - An exceptional fall of some bricks?  
☐ Yes | ☒ **No** - Have there been several damaged chimneys?

How many?:

- ☐ Yes | ☒ **No** - Have there been several chimneys overturned?

How many?:

% for the municipality?:

- ☐ Yes | ☒ **No** - Have there been any falls of façade ornaments?

How important?:

- ☐ Yes | ☒ **No** - Have there been deep cracks in the brick walls?  
☐ Yes | ☒ **No** - Have there been deep cracks in the concrete walls?  
☐ Yes | ☒ **No** - Have there been landslides along the banks or slopes?

Importance:

ADDITIONAL COMMENTS:

## Official inquiry for VILLERS-SAINT-GHISLAIN (BE)

Location: 50.429°N 4.041°E, at 6.1 km from the epicentre.

**Imin: 5 - Imax: 5**

### Did some residents perceive

- ☒ **Yes** | ☐ No - Light vibrations?  
☒ **Yes** | ☐ No - A characteristic noise: rumbling or rolling?

### Did many residents perceive

- ☒ **Yes** | ☐ No - A clear shaking of the building?  
☒ **Yes** | ☐ No - A loud rumble?

### Have we witnessed

- ☐ Yes | ☒ **No** - The oscillation of chandeliers or freely suspended objects?  
☐ Yes | ☒ **No** - Swinging chairs or beds?  
☐ Yes | ☒ **No** - Cracking ceilings?  
☐ Yes | ☒ **No** - Sleepers waking up?

### Has it been witnessed or later observed

- ☐ Yes | ☒ **No** - The shivering of windows and doors?  
☒ **Yes** | ☐ No - The shaking of movable objects (tables, vases, knick-knacks, ...)?

### Has it been witnessed or later observed

- ☐ Yes | ☒ **No** - The clattering of glasses and dishes in buffets?  
☐ Yes | ☒ **No** - The swaying of frames hanging on the wall?  
☐ Yes | ☒ **No** - The creaking of floors?  
☐ Yes | ☒ **No** - Small fragments of plaster falling from ceilings?  
☒ **Yes** | ☐ No - A confusion of the inhabitants (people leaving the house).

### Has it been observed

- ☐ Yes | ☒ **No** - Moving knick-knacks?  
☐ Yes | ☒ **No** - Moving light objects?  
 Which ones?:  
☐ Yes | ☒ **No** - The falling of frames hanging on the wall?  
☐ Yes | ☒ **No** - The falling of light objects placed on polished furniture or marble  
☐ Yes | ☒ **No** - Cracked or broken windows?  
☐ Yes | ☒ **No** - Broken crockery?  
☐ Yes | ☒ **No** - Light objects (vases, flower pots, etc.) spilled?  
☐ Yes | ☒ **No** - Has light furniture moved?  
☐ Yes | ☒ **No** - Has heavy furniture (chests, stoves, ...) vibrated?  
☐ Yes | ☒ **No** - Did bells tinkle?  
☐ Yes | ☒ **No** - Did heavy furniture move?  
☐ Yes | ☒ **No** - Did light furniture tip over?  
☐ Yes | ☒ **No** - Have doors been moved on their hinges?

### Has it been observed

- ☐ Yes | ☒ **No** - Falling pieces of plaster from the ceilings?  
☐ Yes | ☒ **No** - Cracks in wall plaster?  
☒ **Yes** | ☐ No - An exceptional fall of a chimney in poor condition?  
☒ **Yes** | ☐ No - An exceptional fall of some bricks?  
☒ **Yes** | ☐ No - Have there been several damaged chimneys?

How many?:

- ☐ Yes | ☒ **No** - Have there been several chimneys overturned?

How many?:

% for the municipality?:

- ☐ Yes | ☒ **No** - Have there been any falls of façade ornaments?

How important?:

- ☐ Yes | ☒ **No** - Have there been deep cracks in the brick walls?  
☐ Yes | ☒ **No** - Have there been deep cracks in the concrete walls?  
☐ Yes | ☒ **No** - Have there been landslides along the banks or slopes?

Importance:

ADDITIONAL COMMENTS:

## Official inquiry for WAUDREZ (BE)

Location: 50.413°N 4.152°E, at 4.7 km from the epicentre.

**Imin: 5 - Imax: 5**

### Did some residents perceive

- ☐ Yes | ☒ **No** - Light vibrations?  
☐ Yes | ☒ **No** - A characteristic noise: rumbling or rolling?

### Did many residents perceive

- ☒ **Yes** | ☐ No - A clear shaking of the building?  
☒ **Yes** | ☐ No - A loud rumble?

### Have we witnessed

- ☐ Yes | ☒ **No** - The oscillation of chandeliers or freely suspended objects?  
☐ Yes | ☒ **No** - Swinging chairs or beds?  
☐ Yes | ☒ **No** - Cracking ceilings?  
☐ Yes | ☒ **No** - Sleepers waking up?

### Has it been witnessed or later observed

- ☒ **Yes** | ☐ No - The shivering of windows and doors?  
☒ **Yes** | ☐ No - The shaking of movable objects (tables, vases, knick-knacks, ...)?

### Has it been witnessed or later observed

- ☐ Yes | ☒ **No** - The clattering of glasses and dishes in buffets?  
☐ Yes | ☒ **No** - The swaying of frames hanging on the wall?  
☐ Yes | ☒ **No** - The creaking of floors?  
☐ Yes | ☒ **No** - Small fragments of plaster falling from ceilings?  
☒ **Yes** | ☐ No - A confusion of the inhabitants (people leaving the house).

### Has it been observed

- ☐ Yes | ☒ **No** - Moving knick-knacks?  
☐ Yes | ☒ **No** - Moving light objects?  
 Which ones?:  
☐ Yes | ☒ **No** - The falling of frames hanging on the wall?  
☐ Yes | ☒ **No** - The falling of light objects placed on polished furniture or marble  
☐ Yes | ☒ **No** - Cracked or broken windows?  
☐ Yes | ☒ **No** - Broken crockery?  
☐ Yes | ☒ **No** - Light objects (vases, flower pots, etc.) spilled?  
☐ Yes | ☒ **No** - Has light furniture moved?  
☐ Yes | ☒ **No** - Has heavy furniture (chests, stoves, ...) vibrated?  
☐ Yes | ☒ **No** - Did bells tinkle?  
☐ Yes | ☒ **No** - Did heavy furniture move?  
☐ Yes | ☒ **No** - Did light furniture tip over?  
☐ Yes | ☒ **No** - Have doors been moved on their hinges?

### Has it been observed

- ☐ Yes | ☒ **No** - Falling pieces of plaster from the ceilings?  
☐ Yes | ☒ **No** - Cracks in wall plaster?  
☒ **Yes** | ☐ No - An exceptional fall of a chimney in poor condition?  
☐ Yes | ☒ **No** - An exceptional fall of some bricks?  
☒ **Yes** | ☐ No - Have there been several damaged chimneys?

How many?: **4**

- ☒ **Yes** | ☐ No - Have there been several chimneys overturned?

How many?:

% for the municipality?: **1/200%**

- ☐ Yes | ☒ **No** - Have there been any falls of façade ornaments?

How important?:

- ☐ Yes | ☒ **No** - Have there been deep cracks in the brick walls?  
☐ Yes | ☒ **No** - Have there been deep cracks in the concrete walls?  
☐ Yes | ☒ **No** - Have there been landslides along the banks or slopes?

Importance:

ADDITIONAL COMMENTS:

## Official inquiry for WAUTHIER-BRAINE (BE)

Location: 50.681°N 4.299°E, at 28.7 km from the epicentre.

**Imin: 2 - Imax: 2**

### Did some residents perceive

- ☐ Yes | ☒ **No** - Light vibrations?  
☒ **Yes** | ☐ No - A characteristic noise: rumbling or rolling?

### Did many residents perceive

- ☐ Yes | ☒ **No** - A clear shaking of the building?  
☐ Yes | ☒ **No** - A loud rumble?

### Have we witnessed

- ☐ Yes | ☒ **No** - The oscillation of chandeliers or freely suspended objects?  
☐ Yes | ☒ **No** - Swinging chairs or beds?  
☐ Yes | ☒ **No** - Cracking ceilings?  
☐ Yes | ☒ **No** - Sleepers waking up?

### Has it been witnessed or later observed

- ☐ Yes | ☒ **No** - The shivering of windows and doors?  
☐ Yes | ☒ **No** - The shaking of movable objects (tables, vases, knick-knacks, ...)?

### Has it been witnessed or later observed

- ☐ Yes | ☒ **No** - The clattering of glasses and dishes in buffets?  
☐ Yes | ☒ **No** - The swaying of frames hanging on the wall?  
☐ Yes | ☒ **No** - The creaking of floors?  
☐ Yes | ☒ **No** - Small fragments of plaster falling from ceilings?  
☐ Yes | ☒ **No** - A confusion of the inhabitants (people leaving the house).

### Has it been observed

- ☐ Yes | ☒ **No** - Moving knick-knacks?  
☐ Yes | ☒ **No** - Moving light objects?  
 Which ones?:  
☐ Yes | ☒ **No** - The falling of frames hanging on the wall?  
☐ Yes | ☒ **No** - The falling of light objects placed on polished furniture or marble  
☐ Yes | ☒ **No** - Cracked or broken windows?  
☐ Yes | ☒ **No** - Broken crockery?  
☐ Yes | ☒ **No** - Light objects (vases, flower pots, etc.) spilled?  
☐ Yes | ☒ **No** - Has light furniture moved?  
☐ Yes | ☒ **No** - Has heavy furniture (chests, stoves, ...) vibrated?  
☐ Yes | ☒ **No** - Did bells tinkle?  
☐ Yes | ☒ **No** - Did heavy furniture move?  
☐ Yes | ☒ **No** - Did light furniture tip over?  
☐ Yes | ☒ **No** - Have doors been moved on their hinges?

### Has it been observed

- ☐ Yes | ☒ **No** - Falling pieces of plaster from the ceilings?  
☐ Yes | ☒ **No** - Cracks in wall plaster?  
☐ Yes | ☒ **No** - An exceptional fall of a chimney in poor condition?  
☐ Yes | ☒ **No** - An exceptional fall of some bricks?  
☐ Yes | ☒ **No** - Have there been several damaged chimneys?

How many?:

- ☐ Yes | ☒ **No** - Have there been several chimneys overturned?

How many?:

% for the municipality?:

- ☐ Yes | ☒ **No** - Have there been any falls of façade ornaments?

How important?:

- ☐ Yes | ☒ **No** - Have there been deep cracks in the brick walls?  
☐ Yes | ☒ **No** - Have there been deep cracks in the concrete walls?  
☐ Yes | ☒ **No** - Have there been landslides along the banks or slopes?

Importance:

ADDITIONAL COMMENTS:
