# Supplementary material for: The damaging character of shallow 20th century earthquakes in the Hainaut coal area (Belgium)
Source: Copernicus journal article supplement (doi:10.5194/se-2021-74), 2021-07-13
Supplement: Supplementary file 1 [file se-2021-74-supplement.zip › 587_1966-01-16_MORLANWELZ-MARIEMONT.csv]

Imin	Imax	lat	lon	Commune	d_epi	azimuth
3	3	50.5028	4.2178	BOIS-D'HAINE	5.01497189193	341.696133888
3	3	50.4525	4.16	SAINT-VAAST	5.74212729839	261.676672007
3	3	50.4747	4.2386	LA HESTRE	1.63821768398	356.522023114
3	3	50.4781	4.1903	LA LOUVIERE	4.06251970909	299.728887308
3	3	50.4831	4.1511	HOUDENG-AIMERIES	6.81425025578	292.187964951
3	4	50.4906	4.2283	FAYT-LEZ-MANAGE	3.50374955903	346.292396906
3	3	50.4558	4.2442	MORLANWELZ-MARIEMONT	0.554282886942	147.444866676
4	4	50.4847	4.2561	BELLECOURT	2.97582763596	22.5803639072
3	3	50.4556	4.1025	MAURAGE	9.77649633465	267.183385918
4	5	50.4558	4.2061	HAINE-SAINT-PIERRE	2.45224005827	259.029979459
3	3	50.4706	4.2858	CHAPELLE-LEZ-HERLAIMONT	3.45903955845	70.0517439116
3	3	50.4953	4.2867	GODARVILLE	5.1388354899	40.1528206182
4	5	50.4289	4.2328	MONT-SAINTE-ALDEGONDE	3.49708968447	188.412207073
3	4	50.4697	4.33	TRAZEGNIES	6.4806446014	80.3810804089
4	4	50.4833	4.3167	GOUY-LEZ-PIETON	6.03046937174	64.5160522648
3	3	50.4128	4.1681	BINCHE	7.3252705167	224.240690746
3	3	50.4311	4.1075	BRAY	9.94550184084	251.19221022
3	3	50.4253	4.225	LEVAL-TRAHEGNIES	4.00431299541	195.437842758
3	4	50.4475	4.1467	TRIVIERES	6.77036797681	258.184453297
3	3	50.4356	4.1456	PERONNES-LEZ-BINCHE	7.23353187628	247.9982019
2	2	50.415	4.431	CHARLEROI	14.463071855	110.175383574
2	3	50.5219	4.2119	FAMILLEUREUX	7.16858714123	343.860037449
3	4	50.5039	4.2353	MANAGE	4.89474381139	356.093927971
2	2	50.568	4.003	NEUFVILLES	20.6617650467	305.644054149
2	2	50.4733	4.0933	THIEU	10.5201582075	278.140957852
