# Supplementary material for: The damaging character of shallow 20th century earthquakes in the Hainaut coal area (Belgium)
Source: Copernicus journal article supplement (doi:10.5194/se-2021-74), 2021-07-13
Supplement: Supplementary file 1 [file se-2021-74-supplement.zip › 588_1966-01-16_MORLANWELZ-MARIEMONT.csv]

Imin	Imax	lat	lon	Commune	d_epi	azimuth
2	2	50.4356	4.1456	PERONNES-LEZ-BINCHE	8.98072828843	244.824575618
2	2	50.4733	4.0933	THIEU	11.8400398616	271.840956908
2	2	50.415	4.431	CHARLEROI	13.6008136542	116.666891411
2	2	50.4119	4.3222	FONTAINE-L'EVEQUE	7.82896669621	145.616392008
3	3	50.4311	4.1075	BRAY	11.6634688883	248.281503863
2	2	50.4475	4.1467	TRIVIERES	8.42588099187	252.76358314
3	3	50.4553	4.1897	HAINE-SAINT-PAUL	5.25268714959	251.889098697
3	3	50.4556	4.1025	MAURAGE	11.2974452078	261.909495069
3	3	50.5028	4.2178	BOIS-D'HAINE	4.72038255489	320.635826572
3	3	50.5219	4.2119	FAMILLEUREUX	6.70664570907	329.428485046
2	2	50.5711	4.1822	ECAUSSINNES-LALAING	12.5268134305	333.897242371
3	4	50.5717	4.1778	ECAUSSINNES-D'ENGHIEN	12.7266276696	332.770147165
3	3	50.4081	4.2703	ANDERLUES	6.92437217389	173.930085851
2	2	50.4125	4.3575	GOUTROUX	9.42774401184	132.684264904
4	5	50.4289	4.2328	MONT-SAINTE-ALDEGONDE	4.96328222079	202.917403264
4	4	50.4383	4.32	FORCHIES-LA-MARCHE	5.53093222747	129.586131909
3	3	50.4525	4.16	SAINT-VAAST	7.36275143884	254.707644457
5	5	50.4558	4.2061	HAINE-SAINT-PIERRE	4.14032589455	247.593487308
4	4	50.4564	4.3808	COURCELLES	8.70974156847	99.9561241266
4	4	50.4697	4.33	TRAZEGNIES	4.96973384804	90.3577450321
5	5	50.4747	4.2386	LA HESTRE	1.60664924526	288.998654138
4	4	50.4781	4.1903	LA LOUVIERE	5.02925641675	280.347573431
3	4	50.4831	4.1511	HOUDENG-AIMERIES	7.8663696133	280.717526324
4	4	50.4906	4.2283	FAYT-LEZ-MANAGE	3.21148891018	315.535474851
4	4	50.4953	4.2867	GODARVILLE	3.39288175234	33.9442612989
4	4	50.5039	4.2353	MANAGE	4.15849609592	335.078258303
3	3	50.4414	4.2981	PIETON	4.17637864271	139.604991078
4	4	50.4422	4.2561	CARNIERES	3.10478960787	185.119311426
4	4	50.4558	4.2442	MORLANWELZ-MARIEMONT	1.93744243484	215.389956019
4	4	50.4706	4.2858	CHAPELLE-LEZ-HERLAIMONT	1.83285889213	87.9031846396
4	4	50.4847	4.2561	BELLECOURT	1.65847044319	350.392600886
2	2	50.4033	4.2056	EPINOIS	8.36578199184	207.535809943
2	2	50.4839	4.1564	HOUDENG-GOEGNIES	7.51473081977	281.913793562
4	4	50.4833	4.3167	GOUY-LEZ-PIETON	4.28812002168	69.7953823432
2	2	50.3978	4.3322	LEERNES	9.52975357781	147.405399245
2	2	50.346	4.267	LOBBES	13.8023507659	177.931194635
2	3	50.6669	4.3494	OPHAIN-BOIS-SEIGNEUR-ISAAC	22.8005238417	16.0937010764
2	2	50.4414	4.3922	ROUX	9.91267965767	108.668961296
2	2	50.6814	4.2994	WAUTHIER-BRAINE	23.6812019762	6.75308466805
2	2	50.6392	4.1703	HENNUYERES	19.8662484129	341.372844266
2	2	50.5678	4.0028	NEUFVILLES	21.2388012254	300.911754364
