# Supplementary material for: The damaging character of shallow 20th century earthquakes in the Hainaut coal area (Belgium)
Source: Copernicus journal article supplement (doi:10.5194/se-2021-74), 2021-07-13
Supplement: Supplementary file 1 [file se-2021-74-supplement.zip › 589_1966-01-16_MORLANWELZ-MARIEMONT.csv]

Imin	Imax	lat	lon	Commune	d_epi	azimuth
3	3	50.5681	4.2742	ARQUENNES	12.0670371322	4.782320883
3	3	50.6128	4.1375	BRAINE-LE-COMTE	19.0875171386	332.983006238
3	3	50.5517	4.1033	NAAST	15.08729432	312.600451894
3	3	50.4128	4.1681	BINCHE	8.37822687405	231.230352133
2	2	50.4131	4.1519	WAUDREZ	9.28430903387	235.853013424
2	2	50.4175	4.5453	PONT-DE-LOUP	20.8120902285	103.019688423
3	3	50.4194	4.6239	FALISOLLE	26.2428620881	99.7692818826
2	2	50.4356	4.1456	PERONNES-LEZ-BINCHE	8.56688789219	251.573123231
2	2	50.4494	3.8878	JEMAPPES	26.4588914509	267.589327817
3	3	50.4506	4.4294	JUMET	12.0755296199	94.9022166891
2	2	50.4603	4.0833	BOUSSOIT	12.5473536187	270.220519813
3	3	50.4722	4.5903	WANFERCEE-BAULET	23.4905857179	86.5606898889
2	2	50.4733	4.0933	THIEU	11.9277051784	277.189372537
2	2	50.4747	4.1242	STREPY-BRACQUEGNIES	9.77925445067	279.678066151
2	2	50.4828	4.5511	FLEURUS	20.8208870214	82.8910781453
2	2	50.5028	4.1094	LE ROEULX	11.7015240729	294.066440199
2	2	50.5131	4.0161	CHAUSSEE-NOTRE-DAME-LOUVIGNIES	18.289549813	288.935963472
2	2	50.5192	4.6983	BOSSIERE	31.793395817	77.8768723825
2	2	50.5272	4.3631	OBAIX	10.4594973127	44.342969973
2	2	50.5678	4.0028	NEUFVILLES	21.8311209641	303.417306408
3	3	50.5981	4.4436	LOUPOIGNE	20.1363255029	40.2080811001
2	2	50.6103	4.4419	VIEUX-GENAPPE	21.1150080726	37.5739892441
2	2	50.6136	4.3531	BAULERS	18.3168593971	21.0850173237
2	2	50.6253	4.0894	PETIT-ROEULX-LEZ-BRAINE	22.0080953613	326.734313542
2	2	50.6433	4.07	STEENKERQUE	24.4353306903	326.632596286
2	2	50.6467	4.3631	LILLOIS-WITTERZEE	22.0162545692	19.3428182542
2	2	50.6614	4.5147	CEROUX-MOUSTY	28.7687614821	38.7554258791
2	2	50.6669	4.3494	OPHAIN-BOIS-SEIGNEUR-ISAAC	23.8713011279	15.3535552044
2	2	50.6706	4.0375	OISQUERCQ	28.2373410221	326.148664195
2	2	50.6831	4.3717	BRAINE-L'ALLEUD	26.0486546661	17.641680958
2	2	50.6942	4.5761	LIMAL	34.3520574599	40.5551735028
2	2	50.7022	4.145	BIERGHES	28.1466879063	343.223319428
2	2	50.8833	4.5869	MEERBEEK	52.4535012016	26.0135762708
3	3	50.3083	4.2847	RAGNIES	16.9657669329	174.047092696
4	4	50.346	4.267	LOBBES	12.6907592167	177.749897493
3	3	50.3511	4.2156	BIENNE-LEZ-HAPPART	12.5181734484	194.62176917
3	3	50.355	4.1722	MERBES-SAINTE-MARIE	13.242960092	208.15309895
3	3	50.375	4.2344	MONT-SAINTE-GENEVIEVE	9.6286233794	190.902224496
3	3	50.3772	4.6011	SART-EUSTACHE	25.9331004305	110.671800451
3	3	50.3906	4.4058	MONT-SUR-MARCHIENNE	12.9205674067	126.633875124
4	4	50.3981	4.4806	MONTIGNIES-SUR-SAMBRE	17.1205426572	113.629652348
3	3	50.4106	4.3819	MONCEAU-SUR-SAMBRE	10.2567772248	122.348189683
4	4	50.415	4.431	CHARLEROI	13.1392313965	112.328001909
3	3	50.4289	4.5558	FARCIENNES	21.2943305455	99.2356884762
3	3	50.4319	4.4492	LODELINSART	13.7976701894	103.020726485
3	3	50.4569	4.5533	LAMBUSART	20.8305635165	90.8354466403
3	3	50.4653	4.4292	GOSSELIES	12.0285647085	87.1253699171
3	4	50.4669	4.6697	JEMEPPE-SUR-SAMBRE	29.1005007422	88.3306402395
3	3	50.4725	4.6092	VELAINE-SUR-SAMBRE	24.8321339772	86.6553961389
3	3	50.4819	4.7817	SUARLEE	37.1169776359	86.035614756
3	3	50.4839	4.7519	TEMPLOUX	35.0216878846	85.4566628257
3	3	50.4992	4.9033	CHAMPION	45.8690236173	84.2968894082
3	3	50.5042	4.4769	MELLET	16.1608280728	72.2040534043
3	3	50.5089	4.3964	LUTTRE	11.1042473908	60.6158459369
4	4	50.5289	4.2572	SENEFFE	7.66691288749	358.516141049
3	3	50.5319	4.4481	FRASNES-LEZ-GOSSELIES	15.5596887161	58.9952221452
3	3	50.5344	4.7469	BEUZET	35.5247415028	76.3403452556
3	3	50.5381	4.4158	REVES	14.0595446516	51.7751841058
3	3	50.5461	4.1828	MARCHE-LEZ-ECAUSSINNES	11.0330583735	330.2668725
3	3	50.5628	4.2517	FELUY	11.4505047101	357.055985782
3	3	50.6089	4.6389	CHASTRE-VILLEROUX-BLANMONT	31.5591143354	58.1963237321
3	3	50.6186	4.6967	NIL-SAINT-VINCENT-SAINT-MARTIN	35.6320943443	60.1531978675
3	3	50.6814	4.2994	WAUTHIER-BRAINE	24.786209715	6.45071425978
3	3	50.6844	4.5744	LIMELETTE	33.4540614826	41.6194643436
3	3	50.6892	4.0839	PETIT-ENGHIEN	28.3843283399	333.99693379
3	3	50.6925	4.0192	MARCQ	30.981518028	326.687736266
3	3	50.695	4.2061	TUBIZE	26.4187677424	351.711606566
3	3	50.3511	4.1203	PEISSANT	15.6644162526	219.400391806
4	4	50.4119	4.3222	FONTAINE-L'EVEQUE	6.93943936851	140.42256135
4	4	50.4144	4.4272	DAMPREMY	12.9161712911	113.059332931
3	4	50.4236	4.4867	GILLY	16.6052167153	104.025988663
4	4	50.4253	4.225	LEVAL-TRAHEGNIES	4.59135476697	212.799563526
4	4	50.4311	4.1075	BRAY	11.2991932199	253.52906059
4	4	50.4414	4.3922	ROUX	9.61453784457	102.376123304
4	4	50.4475	4.1467	TRIVIERES	8.16567598143	260.239437712
4	4	50.4506	4.3519	SOUVRET	6.60963845366	99.0669162864
4	4	50.4553	4.1897	HAINE-SAINT-PAUL	5.01950624478	264.048492364
4	4	50.4556	4.1025	MAURAGE	11.1951933244	267.5549973
4	4	50.5028	4.2178	BOIS-D'HAINE	5.62481988031	327.84144264
4	4	50.5114	4.3628	PONT-A-CELLES	9.26932086582	51.874885756
4	4	50.5219	4.2119	FAMILLEUREUX	7.68525314988	333.650292226
4	4	50.5711	4.1822	ECAUSSINNES-LALAING	13.5345899529	335.969578339
4	4	50.5717	4.1778	ECAUSSINNES-D'ENGHIEN	13.7251724531	334.895378958
3	3	50.5828	4.4175	HOUTAIN-LE-VAL	17.6453148554	39.2110326166
3	3	50.586	4.072	SOIGNIES	19.3440967068	316.505480506
5	5	50.4081	4.2703	ANDERLUES	5.81941735367	172.771913973
5	5	50.4125	4.3575	GOUTROUX	8.71205717162	127.298573425
5	5	50.4289	4.2328	MONT-SAINTE-ALDEGONDE	3.96245278639	209.193369505
5	5	50.4383	4.32	FORCHIES-LA-MARCHE	4.89769279132	119.505349509
4	4	50.4525	4.16	SAINT-VAAST	7.15033363816	263.338162656
5	5	50.4558	4.2061	HAINE-SAINT-PIERRE	3.85598133762	263.061603646
5	5	50.4564	4.3808	COURCELLES	8.58759601241	92.626204026
5	5	50.4697	4.33	TRAZEGNIES	5.08592268927	77.7242830479
5	5	50.4747	4.2386	LA HESTRE	2.23211689326	317.111196024
5	5	50.4781	4.1903	LA LOUVIERE	5.34233540618	292.167316674
4	4	50.4831	4.1511	HOUDENG-AIMERIES	8.14688479016	288.427498566
5	5	50.4906	4.2283	FAYT-LEZ-MANAGE	4.08046283558	326.544015571
5	5	50.4953	4.2867	GODARVILLE	4.36016100176	25.7541858868
4	5	50.5039	4.2353	MANAGE	5.18851236878	340.261474764
5	5	50.4414	4.2981	PIETON	3.40634922493	127.387166185
7	7	50.4422	4.2561	CARNIERES	1.99931209411	187.964982627
6	6	50.4558	4.2442	MORLANWELZ-MARIEMONT	1.21538187603	247.399274528
6	6	50.4706	4.2858	CHAPELLE-LEZ-HERLAIMONT	2.1785214633	57.2213338133
6	6	50.4847	4.2561	BELLECOURT	2.76149651868	354.247430258
4	4	50.424	4.531	CHATELINEAU	19.6629257478	101.646574517
2	2	50.4033	4.2056	EPINOIS	7.39730703154	211.522193138
2	2	50.6392	4.1703	HENNUYERES	20.9233758301	342.345837837
2	2	50.4839	4.1564	HOUDENG-GOEGNIES	7.82048118716	289.913923595
2	2	50.7144	4.2242	LEMBEEK	28.4128869434	354.894456671
2	2	50.3383	4.2906	THUIN	13.7112281765	170.858028561
2	2	50.38	4.1522	VELLEREILLE-LES-BRAYEUX	11.7425113492	220.767220316
2	2	50.4922	4.4075	VIESVILLE	11.0660476419	71.057434981
3	3	50.6417	4.2128	VIRGINAL-SAMME	20.4871994465	350.620699914
4	4	50.4833	4.3167	GOUY-LEZ-PIETON	4.78750901701	57.2006905363
2	2	50.5208	4.98	FRANC-WARET	51.5394260886	82.1819509837
2	2	50.3978	4.3322	LEERNES	8.61343900689	143.416161228
2	2	50.7908	4.2992	RUISBROEK (VLAAMS-BRABANT)	36.9029494537	4.2956151422
2	2	50.43	4.524	PIRONCHAMPS	19.0470046194	99.9887859591
2	2	50.643	4.57	COURT-SAINT-ETIENNE	29.9515835811	47.0634830062
3	3	50.772	3.885	ONKERZELE	43.6920056049	322.739385898
