# Supplementary material for: The damaging character of shallow 20th century earthquakes in the Hainaut coal area (Belgium)
Source: Copernicus journal article supplement (doi:10.5194/se-2021-74), 2021-07-13
Supplement: Supplementary file 1 [file se-2021-74-supplement.zip › 597_1967-03-28_CARNIERES.csv]

Imin	Imax	lat	lon	Commune	d_epi	azimuth
2	2	50.1014	4.6994	MAZEE	49.8470246334	142.989555243
2	2	50.3383	4.2906	THUIN	13.5584750273	176.8094175
2	2	50.3511	4.2156	BIENNE-LEZ-HAPPART	12.9499787784	200.728401868
2	2	50.4061	4.6561	AISEMONT	27.3861379233	102.501274555
2	2	50.4175	4.5453	PONT-DE-LOUP	19.4310928338	103.979120187
2	2	50.4194	4.6239	FALISOLLE	24.8444722211	100.340886069
2	2	50.4722	5.0353	BONNEVILLE	53.6434000895	88.2591048579
2	2	50.4931	4.6722	ONOZ	28.082537	82.3148607738
2	2	50.5139	4.6244	TONGRINNE	25.1663549309	76.0842394143
2	2	50.5286	4.1542	MIGNAULT	11.7436889022	310.574499276
2	2	50.5728	4.8739	UPIGNY	43.9513391266	73.1827446431
2	2	50.5828	4.4175	HOUTAIN-LE-VAL	16.7834590631	35.4676334533
2	2	50.5983	4.3689	THINES	16.625693076	22.2463260553
2	2	50.5986	4.2894	MONSTREUX	15.4321598393	2.4717362686
2	2	50.6136	4.3531	BAULERS	17.8549983863	16.8445756397
2	2	50.6175	4.5092	BOUSVAL	23.8948531558	42.7545159123
2	2	50.6183	4.9339	TAVIERS	49.5872263911	68.9473447935
2	2	50.6308	4.4539	GLABAIS	22.6478617047	32.9068304086
2	2	50.6433	4.5703	COURT-SAINT-ETIENNE	28.9664432793	45.145229449
2	2	50.6614	4.5147	CEROUX-MOUSTY	27.9015629145	36.4962698505
2	2	50.6706	4.0375	OISQUERCQ	29.0522383582	323.837194678
2	2	50.6722	4.1569	QUENAST	25.1648334929	339.769127091
2	2	50.6797	4.7236	CHAUMONT-GISTOUX	39.8110003591	51.957917402
2	2	50.6836	4.2681	BRAINE-LE-CHATEAU	24.8875603328	358.063440332
2	2	50.6844	4.5744	LIMELETTE	32.5279853075	39.7646986581
2	2	50.6872	4.4853	LASNE-CHAPELLE-SAINT-LAMBERT	29.1593481969	29.8381608491
2	2	50.6892	4.0839	PETIT-ENGHIEN	29.034867751	331.492576542
2	2	50.6903	4.2219	CLABECQ	25.947079685	350.895870097
3	3	50.6925	4.0192	MARCQ	31.7834978278	324.562993521
2	2	50.7022	4.145	BIERGHES	28.5887873822	340.512520395
2	2	50.7031	4.6925	BONLEZ	39.8104939355	47.0534929022
2	2	50.7158	4.4994	GENVAL	32.4208539744	28.5510923654
2	2	50.726	4.553	RIXENSART	35.3447992157	33.0512065292
2	2	50.7367	4.2361	HAL	30.9368015672	354.250743654
2	2	50.7444	4.3367	ALSEMBERG	31.89048229	7.20926370751
2	2	50.768	4.309	BEERSEL	34.3236164902	3.41717140987
2	2	50.795	4.3678	UCCLE	37.7800719903	9.43081124841
3	3	50.3325	4.3531	GOZEE	15.1051309402	159.844639293
3	3	50.346	4.267	LOBBES	12.7146333965	184.173533098
3	3	50.3539	4.4139	JAMIOULX	15.1624474588	141.061390681
3	3	50.37	4.1111	FAUROEULX	15.6314791735	230.239011419
3	3	50.375	4.2344	MONT-SAINTE-GENEVIEVE	9.9951751153	198.937664591
3	3	50.38	4.1522	VELLEREILLE-LES-BRAYEUX	12.7155838159	225.634495319
3	3	50.3897	4.5806	PRESLES	22.7475954311	109.990917619
3	3	50.3906	4.4058	MONT-SUR-MARCHIENNE	11.8114812062	130.764308481
3	3	50.4125	4.3575	GOUTROUX	7.63112879756	133.79035969
3	3	50.4128	4.1681	BINCHE	9.52720607034	236.600890216
3	3	50.4289	4.5731	ROSELIES	21.1051137335	99.3213166488
3	3	50.4356	4.1456	PERONNES-LEZ-BINCHE	9.92446901444	254.180037192
3	3	50.4669	4.5981	KEUMIEE	22.5994509989	87.9310409617
3	3	50.4722	4.5903	WANFERCEE-BAULET	22.0731088825	86.3554563697
3	3	50.4733	4.0933	THIEU	13.3378893959	276.440459544
3	3	50.4794	4.0611	VILLE-SUR-HAINE	15.689878927	277.990049153
3	3	50.4828	4.5511	FLEURUS	19.4123877782	82.3883094946
3	3	50.4831	4.7064	SPY	30.3798358583	84.9835711491
3	3	50.4933	4.8494	SAINT-MARC	40.5878111194	84.5440807152
3	3	50.5042	4.4769	MELLET	14.8148916301	70.5412844299
3	3	50.5089	4.3964	LUTTRE	9.89123885721	56.5924348604
3	3	50.5272	4.3631	OBAIX	9.52103334287	38.2354249621
4	4	50.5344	4.7469	BEUZET	34.1463237244	75.7933220993
3	3	50.5372	4.3669	BUZET	10.571801025	35.6438346129
3	4	50.5381	4.4158	REVES	12.9735270416	47.9074769344
3	3	50.5453	4.5325	MARBAIS	20.2715540283	61.9930483195
3	3	50.5461	4.1828	MARCHE-LEZ-ECAUSSINNES	11.8018672007	324.28388458
3	3	50.5681	4.2742	ARQUENNES	12.0319660047	358.042857322
3	3	50.5692	4.4922	SART-DAMES-AVELINES	19.3412443309	51.0116794495
3	3	50.5786	4.5303	VILLERS-LA-VILLE	22.1170870705	53.2835004321
3	3	50.6019	4.9311	BOLINNE	48.7888098412	70.8721581706
3	3	50.6089	4.6389	CHASTRE-VILLEROUX-BLANMONT	30.3612776974	56.7994912292
3	3	50.61	4.338	NIVELLES	17.1851123473	13.821568457
3	3	50.6128	4.1375	BRAINE-LE-COMTE	19.7729984716	329.329527332
3	3	50.6186	4.6967	NIL-SAINT-VINCENT-SAINT-MARTIN	34.4074438771	58.9918491722
3	3	50.6347	4.6119	MONT-SAINT-GUIBERT	30.5133613192	50.311966869
3	3	50.6392	4.1703	HENNUYERES	21.3967382239	338.734851085
3	3	50.6403	4.7222	TOURINNES-SAINT-LAMBERT	37.2087355046	57.2120874923
3	3	50.6594	4.82	THOREMBAIS-LES-BEGUINES	44.2284419434	59.6915253345
3	3	50.6617	4.4308	PLANCENOIT	24.8515610112	25.4074267815
3	3	50.6628	4.6761	CORROY-LE-GRAND	36.0091313413	51.055477953
3	3	50.6667	4.5692	OTTIGNIES	30.7989328458	41.5951295346
3	3	50.6814	4.2994	WAUTHIER-BRAINE	24.6668629187	3.18651194365
3	3	50.6942	4.5761	LIMAL	33.4459412273	38.7220356364
3	3	50.695	4.2061	TUBIZE	26.660374024	348.705344961
3	3	50.6956	4.4708	OHAIN	29.4876268134	27.2053620294
3	3	50.7144	4.2242	LEMBEEK	28.574115494	352.072296162
3	3	50.7392	4.6975	GREZ-DOICEAU	42.8759660464	43.4219696883
3	3	50.7475	4.2778	HUIZINGEN	31.9820742632	359.721829202
3	3	50.3917	4.4686	COUILLET	15.4056995163	119.475895958
4	4	50.4033	4.2056	EPINOIS	8.22950239826	219.996243984
3	3	50.4106	4.3819	MONCEAU-SUR-SAMBRE	9.08892330957	127.160507061
3	4	50.4144	4.4272	DAMPREMY	11.6228598495	115.81881853
4	4	50.415	4.431	CHARLEROI	11.8379066479	114.956575295
4	4	50.4233	4.1919	RESSAIX	7.47214804368	236.916908303
4	4	50.424	4.531	CHATELINEAU	18.2742689724	102.561513987
4	4	50.4253	4.225	LEVAL-TRAHEGNIES	5.49211863201	225.367905547
3	3	50.4303	4.5239	PIRONCHAMPS	17.636789807	100.702489924
4	4	50.4414	4.3922	ROUX	8.2330302357	104.511630985
4	4	50.4506	4.4294	JUMET	10.6612470191	95.5709061109
4	4	50.4603	4.0833	BOUSSOIT	13.9675304629	270.212737436
3	4	50.4653	4.4292	GOSSELIES	10.6103930151	86.7572180012
4	4	50.4781	4.1903	LA LOUVIERE	6.67902309146	287.579462885
4	4	50.4831	4.1511	HOUDENG-AIMERIES	9.50480666655	285.734650079
4	4	50.4839	4.1564	HOUDENG-GOEGNIES	9.16846257507	286.903900808
4	4	50.4922	4.4075	VIESVILLE	9.7336250347	68.3591658678
4	4	50.5219	4.2119	FAMILLEUREUX	8.41226397273	324.9638541
3	3	50.5517	4.1033	NAAST	16.1611764659	309.205303445
4	4	50.5628	4.2517	FELUY	11.6102126397	350.054544601
4	4	50.5711	4.1822	ECAUSSINNES-LALAING	14.172235883	330.733411355
4	4	50.5717	4.1778	ECAUSSINNES-D'ENGHIEN	14.3851533562	329.781413099
3	3	50.5825	4.5706	MELLERY	24.7063682933	56.4145627685
4	4	50.5981	4.4436	LOUPOIGNE	19.2499282346	36.9939411559
4	4	50.6103	4.4419	VIEUX-GENAPPE	20.280101273	34.4080703875
4	4	50.6417	4.2128	VIRGINAL-SAMME	20.7657879022	346.766997987
3	3	50.6669	4.3494	OPHAIN-BOIS-SEIGNEUR-ISAAC	23.5349638025	12.0331883492
4	4	50.6831	4.3717	BRAINE-L'ALLEUD	25.6537876933	14.633139638
5	5	50.4081	4.2703	ANDERLUES	5.81421054041	186.811101724
5	5	50.4289	4.2328	MONT-SAINTE-ALDEGONDE	4.81756519749	224.120427289
4	4	50.4475	4.1467	TRIVIERES	9.56836278441	261.695601552
5	5	50.4506	4.3519	SOUVRET	5.21204229977	101.545444392
5	5	50.4553	4.1897	HAINE-SAINT-PAUL	6.43373926085	265.373714306
5	5	50.4558	4.2061	HAINE-SAINT-PIERRE	5.26857865469	264.941023833
5	5	50.5028	4.2178	BOIS-D'HAINE	6.4928787632	317.184793064
5	5	50.5114	4.3628	PONT-A-CELLES	8.19899288121	45.7524501193
6	6	50.4119	4.3222	FONTAINE-L'EVEQUE	6.13325072787	150.720057331
5	5	50.4383	4.32	FORCHIES-LA-MARCHE	3.72801913361	130.337265103
6	6	50.4414	4.2981	PIETON	2.4358605257	148.139580211
5	5	50.4564	4.3808	COURCELLES	7.16920647852	93.1632174553
7	7	50.4697	4.33	TRAZEGNIES	3.71045818491	73.0747432154
6	6	50.4706	4.2858	CHAPELLE-LEZ-HERLAIMONT	1.24896639096	19.2494961877
6	6	50.4747	4.2386	LA HESTRE	3.36356150003	299.10388684
6	6	50.4847	4.2561	BELLECOURT	3.22923162449	328.313142017
6	6	50.4906	4.2283	FAYT-LEZ-MANAGE	5.00553209746	312.865567377
6	6	50.4953	4.2867	GODARVILLE	3.95540599726	6.90318805988
5	5	50.5039	4.2353	MANAGE	5.82348103722	327.006054109
7	7	50.4422	4.2561	CARNIERES	2.60803279526	220.615041494
6	6	50.4558	4.2442	MORLANWELZ-MARIEMONT	2.58482027472	259.600517776
6	6	50.4558	4.2442	MORLANWELZ	2.58482027472	259.600517776
2	2	50.4556	4.1025	MAURAGE	12.6142401182	267.844743763
3	3	50.4747	4.1242	STREPY-BRACQUEGNIES	11.1817502136	278.469064
2	2	50.4075	4.5886	AISEAU	22.6900140553	104.795682929
3	3	50.8122	4.3186	FOREST	39.2742353567	3.9721250129
4	5	50.3978	4.3322	LEERNES	7.85045056821	151.785001139
2	2	50.467	4.698	MOUSTIER-SUR-SAMBRE	29.6898905873	88.3359757945
2	2	50.553	4.317	PETIT-ROEULX-LEZ-NIVELLES	10.6729921787	14.2223044146
