# Supplementary material for: The damaging character of shallow 20th century earthquakes in the Hainaut coal area (Belgium)
Source: Copernicus journal article supplement (doi:10.5194/se-2021-74), 2021-07-13
Supplement: Supplementary file 1 [file se-2021-74-supplement.zip › 603_1968-08-12_LA LOUVIERE.csv]

Imin	Imax	lat	lon	Commune	d_epi	azimuth
2	2	50.375	4.2344	MONT-SAINTE-GENEVIEVE	9.61287192	169.597427
2	2	50.5681	4.2742	ARQUENNES	12.85823597	20.71591281
2	2	50.5717	4.1778	ECAUSSINNES-D'ENGHIEN	12.63353529	349.597612
3	4	50.4311	4.1075	BRAY	7.958828687	246.2157603
5	5	50.4475	4.1467	TRIVIERES	4.705612507	252.8373452
4	4	50.4747	4.2386	LA HESTRE	2.607109712	51.14455637
3	3	50.4906	4.2283	FAYT-LEZ-MANAGE	3.643349774	20.88167284
4	4	50.4953	4.2867	GODARVILLE	6.712706509	54.16978098
4	4	50.4033	4.2056	EPINOIS	6.314902298	182.8393617
4	4	50.4081	4.2703	ANDERLUES	7.189193745	143.3982967
2	2	50.4128	4.1681	BINCHE	6.035557604	209.5676588
5	5	50.4253	4.225	LEVAL-TRAHEGNIES	4.004312995	164.5621572
5	5	50.4422	4.2561	CARNIERES	3.826297478	121.145581
4	4	50.4525	4.16	SAINT-VAAST	3.647443126	256.7968992
4	4	50.4706	4.2858	CHAPELLE-LEZ-HERLAIMONT	5.509560067	77.61308495
4	4	50.4747	4.1242	STREPY-BRACQUEGNIES	6.307310641	285.0589223
4	4	50.4839	4.1564	HOUDENG-GOEGNIES	4.641897645	304.9620519
4	4	50.4847	4.2561	BELLECOURT	4.273129098	49.96703014
3	3	50.5219	4.2119	FAMILLEUREUX	6.88698384	1.121044998
4	4	50.4233	4.1919	RESSAIX	4.280109438	197.4889096
5	5	50.4289	4.2328	MONT-SAINTE-ALDEGONDE	3.819815798	154.9047876
5	5	50.4558	4.2061	HAINE-SAINT-PIERRE	0.543116542	210.6603402
5	5	50.462	4.254	MORLANWELZ-MARIEMONT	3.132256336	85.91003701
5	5	50.4781	4.1903	LA LOUVIERE	2.451519456	325.2217756
5	5	50.4553	4.1897	HAINE-SAINT-PAUL	1.533439706	250.0733924
4	4	50.4831	4.1511	HOUDENG-AIMERIES	4.907873336	301.5945423
2	2	50.4556	4.1025	MAURAGE	7.649532779	266.3729398
4	4	50.5028	4.2178	BOIS-D'HAINE	4.79308082	6.629723031
2	2	50.4833	4.3167	GOUY-LEZ-PIETON	8.005985819	71.0696715
