# Supplementary material for: The damaging character of shallow 20th century earthquakes in the Hainaut coal area (Belgium)
Source: Copernicus journal article supplement (doi:10.5194/se-2021-74), 2021-07-13
Supplement: Supplementary file 1 [file se-2021-74-supplement.zip › 606_1968-08-13_LA LOUVIERE.csv]

Imin	Imax	lat	lon	Commune	d_epi	azimuth
2	2	50.3511	4.2156	BIENNE-LEZ-HAPPART	12.120235234	178.115531118
2	2	50.375	4.2344	MONT-SAINTE-GENEVIEVE	9.61287191964	169.59742698
2	2	50.38	4.1522	VELLEREILLE-LES-BRAYEUX	9.80131181126	204.800513404
3	3	50.424	4.531	CHATELINEAU	23.1515964601	99.8368221968
2	2	50.4506	4.3519	SOUVRET	10.1313269912	95.869225051
2	2	50.4697	4.33	TRAZEGNIES	8.58830076698	82.7361837616
2	2	50.5381	4.4158	REVES	16.9907564593	59.1687506872
2	2	50.5681	4.2742	ARQUENNES	12.8582359682	20.7159128072
2	2	50.5711	4.1822	ECAUSSINNES-LALAING	12.5149525953	350.945934401
2	2	50.5717	4.1778	ECAUSSINNES-D'ENGHIEN	12.6335352907	349.597611973
2	2	50.6392	4.1703	HENNUYERES	20.131745469	351.980994787
3	3	50.38	4.03	GIVRY	15.5832762694	235.245295007
2	2	50.4383	4.32	FORCHIES-LA-MARCHE	8.17721082999	107.126716665
4	4	50.4733	4.0933	THIEU	8.41667699253	280.168929692
3	3	50.3511	4.1203	PEISSANT	13.6896214549	207.797624963
3	3	50.355	4.1722	MERBES-SAINTE-MARIE	11.9849951989	192.970835145
4	4	50.4311	4.1075	BRAY	7.95882868725	246.215760346
5	5	50.4475	4.1467	TRIVIERES	4.70561250702	252.837345233
4	4	50.4664	4.0467	HAVRE	11.6168769335	273.576455125
5	5	50.4747	4.2386	LA HESTRE	2.60710971171	51.1445563748
5	5	50.4906	4.2283	FAYT-LEZ-MANAGE	3.64334977418	20.8816728394
4	4	50.4922	4.4075	VIESVILLE	14.4699142497	75.5919050917
4	4	50.4953	4.2867	GODARVILLE	6.71270650873	54.1697809812
4	4	50.586	4.072	SOIGNIES	17.0945223154	325.129932258
4	4	50.4033	4.2056	EPINOIS	6.3149022982	182.839361726
5	5	50.4081	4.2703	ANDERLUES	7.18919374505	143.398296727
5	5	50.4119	4.1058	ESTINNES-AU-VAL	9.13407691259	234.182360792
5	5	50.4128	4.1681	BINCHE	6.03555760357	209.567658777
5	5	50.4253	4.225	LEVAL-TRAHEGNIES	4.00431299541	164.562157242
5	5	50.4356	4.1456	PERONNES-LEZ-BINCHE	5.31883282448	239.341029245
5	5	50.4422	4.2561	CARNIERES	3.82629747774	121.145580981
5	6	50.4525	4.16	SAINT-VAAST	3.64744312579	256.796899155
5	5	50.4706	4.2858	CHAPELLE-LEZ-HERLAIMONT	5.50956006703	77.6130849492
5	5	50.4747	4.1242	STREPY-BRACQUEGNIES	6.30731064096	285.058922314
5	5	50.4839	4.1564	HOUDENG-GOEGNIES	4.64189764547	304.962051912
5	5	50.4847	4.2561	BELLECOURT	4.27312909765	49.9670301359
5	5	50.5039	4.2353	MANAGE	5.20305586903	20.1796714353
5	5	50.5219	4.2119	FAMILLEUREUX	6.88698383988	1.12104499788
5	5	50.4233	4.1919	RESSAIX	4.28010943846	197.488909609
6	6	50.4289	4.2328	MONT-SAINTE-ALDEGONDE	3.81981579794	154.904787613
6	6	50.4558	4.2061	HAINE-SAINT-PIERRE	0.543116541552	210.660340225
6	6	50.462	4.254	MORLANWELZ-MARIEMONT	3.13225633586	85.9100370088
6	6	50.4781	4.1903	LA LOUVIERE	2.45151945589	325.22177559
2	2	50.4603	4.0833	BOUSSOIT	8.99691680221	270.261376346
5	5	50.4553	4.1897	HAINE-SAINT-PAUL	1.53343970553	250.073392351
4	4	50.4831	4.1511	HOUDENG-AIMERIES	4.90787333574	301.594542278
3	3	50.346	4.267	LOBBES	13.312760032	162.256006762
3	3	50.5461	4.1828	MARCHE-LEZ-ECAUSSINNES	9.77011940116	348.61907985
2	2	50.6706	4.0375	OISQUERCQ	26.4235546673	332.515609732
3	3	50.4414	4.2981	PIETON	6.59035465341	108.263284841
2	2	50.4794	4.0611	VILLE-SUR-HAINE	10.7891510156	281.59539734
4	4	50.4131	4.1519	WAUDREZ	6.65246084752	218.373192543
2	2	50.4556	4.1025	MAURAGE	7.6495327787	266.37293976
4	4	50.5028	4.2178	BOIS-D'HAINE	4.79308082007	6.6297230314
2	2	50.4003	4.4489	MARCINELLE	18.2275852317	111.274280346
2	2	50.455	3.948	MONS	18.6137317902	268.388738187
3	3	50.3972	4.0978	ESTINNES-AU-MONT	10.600052818	228.817683236
3	3	50.3833	4.2	BUVRINNES	8.56143821429	184.765338545
2	2	50.4833	4.3167	GOUY-LEZ-PIETON	8.00598581921	71.0696714998
