# Supplementary material for: The damaging character of shallow 20th century earthquakes in the Hainaut coal area (Belgium)
Source: Copernicus journal article supplement (doi:10.5194/se-2021-74), 2021-07-13
Supplement: Supplementary file 1 [file se-2021-74-supplement.zip › 607_1968-09-23_MORLANWELZ-MARIEMONT.csv]

Imin	Imax	lat	lon	Commune	d_epi	azimuth
2	2	50.4475	4.1467	TRIVIERES	6.07707062215	256.805311932
4	4	50.4747	4.2386	LA HESTRE	1.74547765137	20.4723854786
2	2	50.4906	4.2283	FAYT-LEZ-MANAGE	3.40602775753	357.970217952
2	2	50.4128	4.1681	BINCHE	6.84881318384	219.972914237
3	4	50.4253	4.225	LEVAL-TRAHEGNIES	3.87625068085	185.259251352
3	4	50.4356	4.1456	PERONNES-LEZ-BINCHE	6.58055211462	245.673226023
4	4	50.4422	4.2561	CARNIERES	2.7123235858	136.8774325
4	4	50.4525	4.16	SAINT-VAAST	5.04056939419	260.499907437
4	4	50.4706	4.2858	CHAPELLE-LEZ-HERLAIMONT	4.13361996716	73.4045769404
2	2	50.4747	4.1242	STREPY-BRACQUEGNIES	7.68754655825	282.321866168
2	2	50.4839	4.1564	HOUDENG-GOEGNIES	5.86245925491	296.996474188
4	4	50.4847	4.2561	BELLECOURT	3.31395594569	33.9841098746
4	4	50.5039	4.2353	MANAGE	4.8978304314	4.40286658985
2	2	50.5219	4.2119	FAMILLEUREUX	7.00443628323	349.440644143
4	4	50.4289	4.2328	MONT-SAINTE-ALDEGONDE	3.46520250294	176.708520758
5	5	50.4558	4.2061	HAINE-SAINT-PIERRE	1.76032893259	254.618230602
4	5	50.462	4.254	MORLANWELZ-MARIEMONT	1.71864879909	82.5530428081
4	4	50.4553	4.1897	HAINE-SAINT-PAUL	2.90918266418	259.66249489
3	4	50.4831	4.1511	HOUDENG-AIMERIES	6.16255662645	294.673858685
2	2	50.4414	4.2981	PIETON	5.26064339577	113.13386162
2	2	50.4556	4.1025	MAURAGE	9.06733036631	266.954882334
3	4	50.5028	4.2178	BOIS-D'HAINE	4.83910612178	349.696519708
4	4	50.3833	4.2	BUVRINNES	8.79423717251	194.0416725
2	2	50.4564	4.3808	COURCELLES	10.7160993705	92.0834720745
2	2	50.4733	4.0933	THIEU	9.81772828138	278.719817046
