# Supplementary material for: The damaging character of shallow 20th century earthquakes in the Hainaut coal area (Belgium)
Source: Copernicus journal article supplement (doi:10.5194/se-2021-74), 2021-07-13
Supplement: Supplementary file 1 [file se-2021-74-supplement.zip › 608_1968-09-23_HAINE-SAINT-PIERRE.csv]

Imin	Imax	lat	lon	Commune	d_epi	azimuth
2	2	50.4475	4.1467	TRIVIERES	5.77560096847	244.347964823
3	4	50.4747	4.2386	LA HESTRE	1.42016732119	68.3919215322
2	2	50.4906	4.2283	FAYT-LEZ-MANAGE	2.36602677506	14.414759452
2	2	50.4128	4.1681	BINCHE	7.35376010669	210.109567288
2	2	50.4253	4.225	LEVAL-TRAHEGNIES	4.98499074491	175.912763142
2	2	50.4356	4.1456	PERONNES-LEZ-BINCHE	6.52397712622	234.116768238
4	4	50.4422	4.2561	CARNIERES	4.01687735965	140.326923196
3	3	50.4525	4.16	SAINT-VAAST	4.68411371639	245.466753892
2	2	50.4706	4.2858	CHAPELLE-LEZ-HERLAIMONT	4.67187694764	89.1560638302
2	2	50.4747	4.1242	STREPY-BRACQUEGNIES	6.82098973912	274.432897741
3	4	50.4839	4.1564	HOUDENG-GOEGNIES	4.77202305377	288.930494144
3	3	50.4847	4.2561	BELLECOURT	3.03978459712	57.4429974044
4	4	50.5039	4.2353	MANAGE	3.92419793122	16.0574468897
2	2	50.5219	4.2119	FAMILLEUREUX	5.80182134936	354.317969859
3	3	50.4289	4.2328	MONT-SAINTE-ALDEGONDE	4.66138372775	168.748436447
4	4	50.4558	4.2061	HAINE-SAINT-PIERRE	1.86257334071	212.003767418
4	4	50.462	4.254	MORLANWELZ-MARIEMONT	2.57281661274	110.22284943
4	4	50.4553	4.1897	HAINE-SAINT-PAUL	2.70234452689	232.77539504
3	3	50.4831	4.1511	HOUDENG-AIMERIES	5.10331004215	286.617955129
2	2	50.4414	4.2981	PIETON	6.39399105982	119.808663861
3	3	50.5028	4.2178	BOIS-D'HAINE	3.65195947633	357.550513806
2	2	50.4564	4.3808	COURCELLES	11.5173206793	97.485781241
2	2	50.4733	4.0933	THIEU	9.00216073096	272.385889506
2	2	50.4131	4.1519	WAUDREZ	7.96643303086	217.417186441
2	2	50.4033	4.2056	EPINOIS	7.48973746485	187.856236651
