# Supplementary material for: The damaging character of shallow 20th century earthquakes in the Hainaut coal area (Belgium)
Source: Copernicus journal article supplement (doi:10.5194/se-2021-74), 2021-07-13
Supplement: Supplementary file 1 [file se-2021-74-supplement.zip › 612_1970-11-03_MARCHIENNE-AU-PONT.csv]

Imin	Imax	lat	lon	Commune	d_epi	azimuth
3	3	50.4081	4.2703	ANDERLUES	9.93290614835	268.83460923
3	3	50.5681	4.2742	ARQUENNES	20.0541811209	331.330643089
2	2	50.4847	4.2561	BELLECOURT	13.7309575381	307.299800544
3	3	50.3167	4.25	BIERCEE	15.4051701859	227.709072248
3	3	50.3894	4.5139	BOUFFIOULX	7.73448653367	107.193525267
3	4	50.424	4.531	CHATELINEAU	8.73978420188	79.6891797638
2	2	50.3917	4.4686	COUILLET	4.63704104726	116.017130902
4	4	50.4564	4.3808	COURCELLES	5.56276529509	338.113464378
5	5	50.4144	4.4272	DAMPREMY	1.31692208446	68.1755517721
3	3	50.4119	4.3222	FONTAINE-L'EVEQUE	6.24464365364	271.97337909
3	3	50.4236	4.4867	GILLY	5.65739685095	74.4604533658
2	2	50.4653	4.4292	GOSSELIES	6.30084786158	12.4951031026
3	3	50.4125	4.3575	GOUTROUX	3.74216858024	274.281989215
3	4	50.3167	4.3833	HAM-SUR-HEURE	10.5507768287	190.38374458
3	4	50.3539	4.4139	JAMIOULX	6.24652515703	177.45330415
4	4	50.4506	4.4294	JUMET	4.72191666934	16.9657399058
4	4	50.3792	4.3561	LANDELIES	5.14076976579	228.226761108
4	4	50.3978	4.3322	LEERNES	5.69511248749	256.244329524
2	2	50.346	4.267	LOBBES	12.4156780556	235.067576206
4	4	50.4319	4.4492	LODELINSART	3.70075075665	48.8168141877
5	5	50.4067	4.3961	MARCHIENNE-AU-PONT	1.05408703629	249.625270832
5	5	50.4003	4.4489	MARCINELLE	2.96849922081	111.299235363
5	5	50.4106	4.3819	MONCEAU-SUR-SAMBRE	1.99856763706	271.924575966
5	5	50.3786	4.3797	MONTIGNY-LE-TILLEUL	4.10390135641	211.68014793
5	5	50.3981	4.4806	MONTIGNIES-SUR-SAMBRE	5.19079115879	104.74714306
5	5	50.3906	4.4058	MONT-SUR-MARCHIENNE	2.17855591036	187.879949315
3	3	50.3244	4.4453	NALINNES	9.84747207621	165.210257386
2	2	50.4639	4.4742	RANSART	7.53334380318	37.2360291404
5	5	50.4414	4.3922	ROUX	3.7148246768	340.099807512
3	3	50.4506	4.3519	SOUVRET	6.11871199429	317.592408924
2	2	50.3383	4.2906	THUIN	11.651451672	226.848214797
