# Supplementary material for: The damaging character of shallow 20th century earthquakes in the Hainaut coal area (Belgium)
Source: Copernicus journal article supplement (doi:10.5194/se-2021-74), 2021-07-13
Supplement: Supplementary file 1 [file se-2021-74-supplement.zip › 627_1976-10-24_GIVRY.csv]

Imin	Imax	lat	lon	Commune	d_epi	azimuth
2	2	50.2817	4.1914	MONTIGNIES-SAINT-CHRISTOPHE	14.9953974208	125.442675871
2	2	50.3061	4.1794	HANTES-WIHERIES	12.8355151582	117.785460713
2	2	50.355	4.1722	MERBES-SAINTE-MARIE	10.8452316472	92.8810062727
2	2	50.3903	3.8883	EUGIES	9.9564854159	289.83737745
2	2	50.4033	4.2056	EPINOIS	14.0523235036	69.8835853931
2	2	50.4053	3.8758	LA BOUVERIE	11.4272476781	296.220955601
2	2	50.4286	3.7406	THULIN	21.2825229824	291.118707857
2	2	50.4289	4.2328	MONT-SAINTE-ALDEGONDE	16.9619281008	63.0557843126
2	2	50.445	3.803	BOUSSU	18.0945588845	301.586327115
2	2	50.4475	4.1467	TRIVIERES	13.2616551023	42.7337237512
2	2	50.4747	4.1242	STREPY-BRACQUEGNIES	14.7524761711	30.0926282585
4	4	50.515	3.8978	ERBISOEUL	19.3040791135	333.321285222
2	2	50.5331	3.9125	JURBISE	20.713942599	338.410616637
2	2	50.5717	4.1778	ECAUSSINNES-D'ENGHIEN	26.0784600556	25.3827633542
2	2	50.5825	3.9172	CAMBRON-SAINT-VINCENT	25.8040181537	343.610735857
2	2	50.605	3.389	TOURNAI	52.4258750511	301.564870349
2	2	51.1858	3.5672	EEKLO	97.2589869397	341.003203312
2	2	51.213	3.231	BRUGGE	109.99906739	329.919706597
3	3	50.1917	4.2681	RENLIES	25.75363919	136.532979454
3	3	50.3597	3.7947	ERQUENNES	16.0321931493	269.967487731
3	4	50.38	4.1522	VELLEREILLE-LES-BRAYEUX	9.66477479213	76.6409064213
3	3	50.3892	4.2106	BUVRINNES	13.9423593221	76.4548426402
3	3	50.3931	3.9194	GENLY	8.04775316629	297.26523785
3	3	50.4222	3.8467	WASMES	14.1331883693	299.37779702
3	3	50.4233	4.1919	RESSAIX	14.1070124763	59.9911509436
4	4	50.4311	4.1075	BRAY	10.0628710477	38.1575513195
3	3	50.4356	4.1456	PERONNES-LEZ-BINCHE	12.2667339155	46.672528807
4	4	50.4431	3.8653	QUAREGNON	14.367261313	310.104764698
3	3	50.4458	3.8478	WASMUEL	15.5231896744	308.005852477
3	3	50.4525	4.16	SAINT-VAAST	14.3152198191	43.9927223914
3	3	50.4603	4.0833	BOUSSOIT	12.0302388136	21.9396994261
3	3	50.4883	3.9664	MAISIERES	14.7712807277	345.077313979
3	3	50.5678	4.0028	NEUFVILLES	23.1474938359	356.982304927
3	3	50.3036	4.245	LEERS-ET-FOSTEAU	17.2048589141	111.299151401
4	4	50.3083	4.2847	RAGNIES	19.7039073431	106.867705776
4	4	50.3094	4.1528	SOLRE-SUR-SAMBRE	11.0034489658	120.714192659
5	5	50.3103	4.1308	ERQUELINNES	9.63286638416	124.980721558
4	4	50.3239	4.165	MERBES-LE-CHATEAU	11.0755560134	111.201962891
4	4	50.3275	4.0703	GRAND-RENG	5.08817094819	135.256471317
4	4	50.34	3.905	AULNOIS	8.4819552691	254.838405137
3	3	50.3511	4.1203	PEISSANT	7.2062379792	97.8577004353
4	4	50.3511	4.2156	BIENNE-LEZ-HAPPART	13.9551503798	93.9927538723
4	4	50.3594	3.9469	QUEVY-LE-GRAND	5.20218080987	269.29304726
4	4	50.37	4.1111	FAUROEULX	6.57665366692	80.2272292554
3	3	50.3714	3.8794	SARS-LA-BRUYERE	10.0838025769	277.278510858
4	4	50.3761	3.8067	BLAUGIES	15.2809420817	276.812569101
4	4	50.3836	4.0831	HAULCHIN	5.20027072168	59.6566300032
4	4	50.3972	4.0978	ESTINNES-AU-MONT	6.91000479233	53.1831287345
4	4	50.4017	3.9331	NOIRCHAIN	7.72793770787	306.919994472
4	4	50.4106	3.8942	FRAMERIES	10.5702506813	302.222369561
4	4	50.4119	4.1058	ESTINNES-AU-VAL	8.40031317924	46.5535978943
4	4	50.4125	3.9689	NOUVELLES	6.87838282825	328.125412302
4	4	50.4128	4.1681	BINCHE	12.0596521776	60.7980997891
4	4	50.4131	4.1519	WAUDREZ	11.0853409886	57.7520052274
3	3	50.4136	3.8622	PATURAGES	12.7080490088	298.041402237
4	4	50.4203	3.9447	CIPLY	8.58289592773	321.427457616
4	4	50.4258	3.9875	SPIENNES	7.6755590883	342.489175977
4	4	50.4272	3.9608	MESVIN	8.57893799993	330.63657801
4	4	50.4381	4.0072	SAINT-SYMPHORIEN	8.73512881016	354.024600293
4	4	50.4494	3.8878	JEMAPPES	13.682979956	316.668381751
4	4	50.455	3.948	MONS	11.7417826951	334.184689821
4	4	50.4556	4.1025	MAURAGE	12.1442210654	28.8446588753
4	4	50.4664	4.0467	HAVRE	11.9868087617	9.09943985633
3	3	50.4733	4.0933	THIEU	13.6374864586	22.4303856399
4	4	50.4747	4.0081	OBOURG	12.7868968476	356.212069365
3	3	50.4794	4.0611	VILLE-SUR-HAINE	13.5991161224	12.3874106806
4	4	50.5058	3.79	SIRAULT	23.023463985	314.87204286
5	5	50.3397	3.9444	GOEGNIES-CHAUSSEE	5.83537310677	247.26330785
5	5	50.3572	4.0667	ROUVEROY	3.33778472104	95.3362839436
5	5	50.3669	3.9394	QUEVY-LE-PETIT	5.78612846358	277.653775126
5	5	50.38	4.03	GIVRY	2.33571032559	17.7298051058
5	5	50.4044	4.0194	HARMIGNIES	4.93908149671	359.505168557
5	5	50.4294	4.0406	VILLERS-SAINT-GHISLAIN	7.85756592016	10.7359844275
6	6	50.3611	4.0758	CROIX-LEZ-ROUVEROY	3.97250895641	88.2134346266
6	6	50.3619	3.9856	HAVAY	2.45692652365	274.94801096
5	5	50.3353	3.9722	BETTIGNIES-FR	4.37314501829	231.095679135
5	5	50.2817	4.0417	RECQUIGNIES-FR	8.84576346312	169.930025082
5	5	50.3408	4.0161	VILLERS-SIRE-NICOLE-FR	2.15368999308	187.406602166
4	4	50.3072	4.0106	ELESMES-FR	5.91124268196	186.504530339
4	4	50.2953	4.1019	JEUMONT-FR	9.26318368154	140.949625564
4	4	50.33	4.0478	VIEUX-RENG-FR	3.87967282383	149.321874084
3	3	50.2572	4.0767	COLLERET-FR	12.1273381164	160.523885948
2	2	50.2556	3.9933	FERRIERES-LA-GRANDE-FR	11.7676639888	189.311890654
2	2	50.2775	3.9733	MAUBEUGE-FR	9.76103745262	199.940103915
4	5	50.3031	3.9189	FEIGNIES-FR	9.58529830837	228.715180424
2	2	50.2981	3.7989	BAVAY-FR	17.1833174044	246.46276517
2	2	50.2767	3.7983	MECQUIGNIES-FR	18.3077113225	239.679662556
3	3	50.205	3.8364	AULNOYE-AYMERIES-FR	21.6450466002	217.268853891
3	3	50.1803	3.8306	LEVAL-FR	24.1221955774	214.112875149
3	3	50.2239	3.8472	PONT-SUR-SAMBRE-FR	19.5146293735	219.190819774
3	3	50.2408	3.8825	BOUSSIERES-SUR-SAMBRE-FR	16.4857348824	216.511891336
3	3	50.2331	3.9064	SAINT-REMY-DU-NORD-FR	16.2718287734	209.87517135
2	2	50.2878	3.8128	AUDIGNIES-FR	16.7993769272	241.520702424
2	2	50.0933	3.8467	CARTIGNIES-FR	32.1402291531	202.695627258
2	2	50.0408	4.1194	OHAIN-FR	36.2078607427	168.658413823
