# Supplementary material for: The damaging character of shallow 20th century earthquakes in the Hainaut coal area (Belgium)
Source: Copernicus journal article supplement (doi:10.5194/se-2021-74), 2021-07-13
Supplement: Supplementary file 1 [file se-2021-74-supplement.zip › 641_1982-09-14_CARNIERES.csv]

Imin	Imax	lat	lon	Commune	d_epi	azimuth
4	4	50.4081	4.2703	ANDERLUES	4.15065662611	148.738902594
2	2	50.4128	4.1681	BINCHE	5.93787684669	239.393759285
4	4	50.5028	4.2178	BOIS-D'HAINE	7.16132929378	347.295130632
3	3	50.3833	4.2	BUVRINNES	6.91839231232	204.281349964
4	4	50.4422	4.2561	CARNIERES	1.16959508183	77.9161488865
3	3	50.4033	4.2056	EPINOIS	4.75842043993	210.928007253
4	4	50.4906	4.2283	FAYT-LEZ-MANAGE	5.68961514045	351.608987163
3	3	50.4119	4.3222	FONTAINE-L'EVEQUE	6.6249180718	118.120797653
3	3	50.4383	4.32	FORCHIES-LA-MARCHE	5.68638983268	91.8749132436
4	4	50.4747	4.2386	LA HESTRE	3.86123408873	358.525131127
4	4	50.4253	4.225	LEVAL-TRAHEGNIES	1.95183951576	213.100558972
4	4	50.4289	4.2328	MONT-SAINTE-ALDEGONDE	1.33650570644	202.506677519
3	3	50.462	4.254	MORLANWELZ-MARIEMONT	2.64151618447	22.1067071418
3	3	50.4356	4.1456	PERONNES-LEZ-BINCHE	6.72425573973	265.862254155
3	3	50.4414	4.2981	PIETON	4.13025870071	87.8167379943
3	3	50.4131	4.1519	WAUDREZ	6.93869861447	244.48733124
3	4	50.4781	4.1903	LA LOUVIERE	5.51520921332	320.234084817
2	3	50.4558	4.2061	HAINE-SAINT-PIERRE	2.98104862583	306.14000985
