# Supplementary material for: The damaging character of shallow 20th century earthquakes in the Hainaut coal area (Belgium)
Source: Copernicus journal article supplement (doi:10.5194/se-2021-74), 2021-07-13
Supplement: Supplementary file 1 [file se-2021-74-supplement.zip › 651_1983-11-08_LIEGE.csv]

Imin	Imax	lat	lon	Commune	d_epi	azimuth
2	2	49.6847	5.5153	TINTIGNY	104.925215385	179.988177714
2	2	49.7308	5.6503	HABAY	100.264609167	174.416781151
2	2	49.8731	4.9347	VRESSE-SUR-SEMOIS	93.6156977664	206.461789292
2	2	50.3111	4.8811	ANHEE	57.1660412503	232.173253965
2	2	50.3275	4.8789	YVOIR	56.178721232	233.732311052
2	2	50.4289	4.5558	FARCIENNES	71.5283950803	252.333526637
2	2	50.447	3.821	SAINT-GHISLAIN	121.766447094	261.137160891
2	2	50.5883	3.8078	CHIEVRES	120.926056536	268.566977912
2	2	50.6117	4.4517	GENAPPE	75.2706599208	269.030640147
2	2	50.6492	3.5911	SILLY	136.116363158	271.736390554
2	2	50.693	4.04	ENGHIEN	104.54395835	274.536104209
2	2	50.723	4.61	WAVRE	64.8376101163	279.730378052
2	2	50.7258	4.0303	HERNE	105.505272142	276.49258967
2	2	50.734	3.683	ELLEZELLES	130.014393064	275.911689006
2	2	50.7689	4.4733	HOEILAART	75.2477369696	282.425331959
2	2	50.795	4.3678	UCCLE	83.1305712132	283.356555739
2	2	50.7958	4.1203	GOOIK	100.261097708	281.268935207
2	2	50.8047	3.7661	BRAKEL	125.066966047	279.718537925
2	2	50.8169	4.4289	AUDERGHEM	79.5215000651	285.742333233
2	2	50.8653	4.3744	SCHAERBEEK	84.7193396935	288.596151678
2	2	50.87	3.8128	LEEUWERGEM	123.110380317	283.288973635
2	2	50.8742	4.95	GLABBEEK	48.3734063471	304.702766513
2	2	50.8822	4.4042	EVERE	83.3291276139	290.266847951
2	2	50.8839	4.0844	DENDERLEEUW	104.885737075	286.301191278
2	2	50.9139	4.4361	MACHELEN (VLAAMS-BRABANT)	82.485621042	293.096574348
2	2	50.9425	4.5492	KAMPENHOUT	76.5689262836	297.562127882
2	2	50.9522	4.71	ROTSELAAR	67.2514088569	302.741654592
2	2	50.9603	3.5975	NAZARETH	140.156780916	286.033794618
2	2	50.9786	4.6383	HAACHT	73.0792481372	302.594525123
2	2	50.9817	4.5733	BOORTMEERBEEK	77.1663380355	301.021153301
2	2	50.985	4.4656	ZEMST	83.9571811975	298.636734491
2	2	50.9956	3.2689	PITTEM	163.497098714	285.352515068
2	2	50.9958	3.7483	MERELBEKE	131.06507259	288.873355765
2	2	51.0058	3.8044	MELLE	127.664623167	289.881800566
2	2	51.0539	4.8825	HERSELT	65.0352947591	317.006660993
2	2	51.0572	3.8014	DESTELBERGEN	129.794173121	292.246079338
2	2	51.0572	4.2028	SINT-AMANDS	104.026941112	297.828497688
2	2	51.0575	4.6314	PUTTE	78.4608056234	307.856111818
2	2	51.07	4.0403	ZELE	114.905102268	295.90564921
2	2	51.0708	4.5328	SINT-KATELIJNE-WAVER	84.9172296879	305.836275042
2	2	51.078	4.277	PUURS	100.527810432	300.344593509
2	2	51.0892	4.9208	WESTERLO	66.2021018278	321.034405745
2	2	51.0961	3.6072	LOVENDEGEM	144.055463861	291.928738219
2	2	51.1011	4.2369	BORNEM	104.240144868	300.81827098
2	2	51.1031	2.6561	KOKSIJDE	208.076239225	285.81957056
2	2	51.1078	4.0869	WAASMUNSTER	113.821565973	298.517488323
2	2	51.2122	5.4275	OVERPELT	65.2809388238	354.625687133
2	2	51.2206	4.3278	ZWIJNDRECHT	106.365116841	308.760096396
2	2	51.3028	4.6936	WESTMALLE	94.6831765234	322.770343588
2	2	51.3242	4.9869	OUD-TURNHOUT	85.8732536675	334.615522543
2	2	51.3511	4.7625	RIJKEVORSEL	96.2420140392	326.99474217
2	2	51.3531	4.6444	BRECHT	101.208354353	323.183681126
2	2	52.6406	4.7513	ALKMAAR	230.077133948	347.012520161
3	3	49.2032	6.2977	VIGY	168.149009446	160.169359576
3	3	49.4435	6.363	SIERCK-LES-BAINS	145.081613826	154.919011392
3	3	49.4498	5.5997	LONGUYON	131.191326869	177.316560643
3	3	49.5925	5.815	MESSANCY	117.161640767	169.330809386
3	3	49.5972	4.7337	OMONT	127.549656312	206.285436502
3	3	49.8623	7.8891	BAD KREUZNACH	189.545537426	115.783782152
3	3	49.8756	8.6518	DARMSTADT	238.837024358	109.299806583
3	3	49.9167	5.3781	LIBRAMONT-CHEVIGNY	79.7205723456	187.084619103
3	3	49.9423	4.6376	REVIN	98.6292707303	219.684861943
3	3	49.9817	4.9375	GEDINNE	82.8304680338	210.004184403
3	3	50.0033	5.7161	BASTOGNE	70.9493697483	168.275533844
3	3	50.1295	8.6597	FRANKFURT AM MAIN	230.436247858	102.708189542
3	3	50.1339	5.7894	HOUFFALIZE	58.3243302518	160.343856944
3	3	50.1422	8.1469	TAUNUSSTEIN	194.816387302	105.086457777
3	3	50.1861	5.0147	HOUYET	60.6724536283	216.079933958
3	3	50.2103	6.1408	BURG-REULAND	64.3189549625	136.010711526
3	3	50.2408	4.8408	ONHAYE	64.416627464	228.29893955
3	3	50.2922	5.5597	EREZEE	37.4883077072	175.125745089
3	3	50.3386	5.3694	SOMME-LEUZE	33.8103140949	197.853020689
3	3	50.3533	5.4592	DURBUY	30.8127098226	187.40506733
3	3	50.355	6.1711	AMEL	55.5865082766	122.861398748
3	3	50.3967	3.7803	DOUR	125.702073511	258.859429548
3	3	50.415	4.431	CHARLEROI	80.4419942598	253.28867932
3	3	50.4275	6.0297	MALMEDY	42.7716021265	121.23093341
3	3	50.4283	5.5328	HAMOIR	22.2502999499	176.741276978
3	3	50.4325	4.6158	TAMINES	67.3633832346	251.513120277
3	3	50.455	3.948	MONS	112.732768861	260.776739016
3	3	50.466	4.864	NAMUR	49.5361898082	248.918458197
3	3	50.4894	5.7931	LA REID	25.0211370652	127.931124569
3	3	50.4972	5.4758	TAVIER	14.8129124193	190.822531785
3	3	50.4981	5.5175	VILLERS-AUX-TOURS	14.4511483248	179.296704292
3	3	50.5378	5.2156	WANZE	23.4591550298	244.792984941
3	3	50.5533	4.8025	LA BRUYERE	51.1341477859	260.922964063
3	3	50.5603	5.9656	JALHAY	32.7829037062	103.106581002
3	3	50.5786	4.5303	VILLERS-LA-VILLE	69.9271521757	265.873333072
3	3	50.5847	5.2822	FIZE-FONTAINE	17.1693915181	253.797470066
3	3	50.5939	4.9086	EGHEZEE	43.0900369235	265.183979366
3	3	50.5947	5.2281	WARNANT-DREYE	20.6425740387	259.773142687
3	3	50.61	4.338	NIVELLES	83.3206705191	269.077899329
3	3	50.6139	5.2317	VAUX-ET-BORSET	20.1098489255	265.636087665
3	3	50.6164	5.205	VIEUX-WALEFFE	21.9754283202	266.753481055
3	3	50.6186	4.6967	WALHAIN	57.9157866826	269.281766627
3	3	50.6233	4.8128	PERWEZ	49.6909631748	269.668557828
3	3	50.6292	3.7769	ATH	122.9793129	270.734026373
3	3	50.6347	4.6119	MONT-SAINT-GUIBERT	63.9005153863	271.017365175
3	3	50.6511	4.265	ITTRE	88.4614925013	272.147745926
3	3	50.6658	4.1342	REBECQ	97.751851718	272.999125702
3	3	50.6806	6.0103	LONTZEN	35.5119446485	80.3246745893
3	3	50.6831	4.3717	BRAINE-L'ALLEUD	81.0809673034	274.777384854
3	3	50.6836	4.2681	BRAINE-LE-CHATEAU	88.3910996818	274.494414302
3	3	50.6872	4.4853	LASNE	73.1098515434	275.566024815
3	3	50.7058	3.2653	ESTAIMPUIS	159.280901245	273.984299791
3	3	50.7111	5.0325	LINCENT	35.3407612891	285.349935366
3	3	50.7128	3.8325	LESSINES	119.313286873	275.185046015
3	3	50.7181	4.3975	WATERLOO	79.6284511943	277.662974779
3	3	50.726	4.553	RIXENSART	68.8657927607	279.480280704
3	3	50.7378	3.74	FLOBECQ	126.038397659	276.247325283
3	3	50.7392	4.6975	GREZ-DOICEAU	59.085095546	282.40089168
3	3	50.742	4.509	LA HULPE	72.2175261435	280.502572635
3	3	50.7461	4.3458	SINT-GENESIUS-RODE	83.663026848	279.486522177
3	3	50.7564	5.3022	HEERS	20.7393381841	313.610828146
3	3	50.768	4.309	BEERSEL	86.6173411943	280.824328452
3	3	50.7719	3.885	GERAARDSBERGEN	116.263427217	278.543942102
3	3	50.7736	4.5383	OVERIJSE	70.8769663749	283.587534319
3	3	50.775	4.8889	HOEGAARDEN	47.1579972605	290.531444999
3	3	50.78	4.245	SINT-PIETERS-LEEUW	91.2953610775	281.164265712
3	3	50.7975	4.4153	WATERMAEL-BOITSFORT	79.9271534772	284.070319836
3	3	50.807	4.94	TIENEN	45.2274595769	296.343590537
3	3	50.8078	3.6825	MAARKEDAL	130.948672039	279.49416566
3	3	50.8244	4.5142	TERVUREN	73.966158799	287.567124016
3	3	50.8392	4.6647	OUD-HEVERLEE	64.4636465644	291.703108406
3	3	50.8397	4.8325	BOUTERSEM	53.6304813752	296.31147508
3	3	50.8428	4.4339	WOLUWE-SAINT-LAMBERT	79.9738021356	287.802517275
3	3	50.8442	4.0744	ROOSDAAL	104.502651654	283.862389214
3	3	50.8456	5.0475	LINTER	40.9282979668	306.439756623
3	3	50.8578	4.3408	MOLENBEEK-SAINT-JEAN	86.732558996	287.595865447
3	3	50.8617	4.2939	BERCHEM-SAINTE-AGATHE	90.0220033881	287.257539968
3	3	50.8617	4.6303	BERTEM	67.6390117384	292.945789678
3	3	50.8631	4.4667	KRAAINEM	78.4753510488	289.872392895
3	3	50.8767	5.3078	ALKEN	31.2926585898	332.222717244
3	3	50.881	4.703	LEUVEN	63.8391550866	296.473072728
3	3	50.8886	4.4708	ZAVENTEM	79.177729635	291.881277847
3	3	50.9033	4.2786	AFFLIGEM	92.4474865138	289.823927216
3	3	50.9081	4.6753	HERENT	66.9329473125	298.069140874
3	3	50.9108	5.0583	KORTENAKEN	45.0299552603	314.49455161
3	3	50.9219	4.7567	HOLSBEEK	62.6884576803	301.728728554
3	3	50.9336	3.9761	ERPE-MERE	113.732572555	287.987081565
3	3	50.9414	5.1675	HERK-DE-STAD	42.61511022	325.03049666
3	3	50.965	5.5028	GENK	37.499221149	358.690366399
3	3	50.9675	3.9792	LEDE	114.67263566	289.822870366
3	3	50.9814	4.9792	SCHERPENHEUVEL	54.5168531815	316.355033113
3	3	50.9867	4.8325	AARSCHOT	62.502876146	309.938264728
3	3	50.9919	5.3672	ZONHOVEN	41.8008281176	345.625976907
3	3	51.0075	3.9758	WICHELEN	116.394173757	291.861574274
3	3	51.0197	4.7825	BEGIJNENDIJK	67.5477612896	310.455758203
3	3	51.0239	4.5497	BONHEIDEN	81.0281558864	303.297832748
3	3	51.0272	4.5575	VOSSELAAR	80.7666824548	303.726254829
3	3	51.0319	5.3722	HOUTHALEN	46.0444366952	347.434237166
3	3	51.0497	5.2256	BERINGEN	51.1498036084	336.624907632
3	3	51.054	3.729	GENT	134.426897111	291.332755225
3	3	51.0689	5.0897	TESSENDERLO	57.470195634	328.75354293
3	3	51.0761	4.7928	HULSHOUT	71.2134500657	314.705704405
3	3	51.0964	4.5111	DUFFEL	87.8101154597	306.787340057
3	3	51.1194	4.6622	BERLAAR	81.1878577472	312.654126692
3	3	51.1258	4.2153	TEMSE	106.931306992	301.692774645
3	3	51.1322	5.0803	MEERHOUT	63.8908421184	331.558888741
3	3	51.1336	5.4522	PEER	56.4193458644	355.53138732
3	3	51.1419	5.5992	BREE	57.4755822888	5.88458062051
3	3	51.1456	4.8583	OLEN	73.8303606511	321.506024984
3	3	51.1564	3.2367	OOSTKAMP	170.730669579	291.01943164
3	3	51.1628	4.9919	GEEL	69.9570581372	328.462036346
3	3	51.1667	4.4639	MORTSEL	95.1804787126	309.428902973
3	3	51.215	4.414	ANTWERPEN	101.279189317	310.573904061
3	3	51.2294	5.4331	NEERPELT	67.1511987337	355.112803963
3	3	51.2414	4.9681	KASTERLEE	78.3229307501	330.815642384
3	3	51.2419	3.5267	SINT-LAUREINS	155.554910449	296.81080313
3	3	51.2531	5.5478	HAMONT-ACHEL	69.5787871549	1.88606144278
3	3	51.3606	4.8658	MERKSPLAS	93.3782152898	331.03635853
3	3	51.3731	4.9961	RAVELS	90.5406822211	336.479042879
3	3	51.4022	4.7633	HOOGSTRATEN	100.997489744	328.805747312
3	3	51.4667	4.4642	ESSEN	118.891302124	322.107196315
3	3	51.9377	8.8884	DETMOLD	276.772473499	56.9306945318
3	3	51.9758	5.9085	ARNHEM	152.438145646	10.2180482196
3	3	52.0937	5.1076	UTRECHT	165.516462296	350.287323038
3	3	52.3627	4.8893	AMSTERDAM	197.827908303	347.555807235
3	4	49.2473	5.9391	BRIEY	156.560337517	168.623987046
3	4	49.2942	6.1931	GUENANGE	156.129543575	161.582005788
3	4	49.3274	6.1224	FLORANGE	151.080780571	163.006321447
3	4	49.3571	6.1684	THIONVILLE	148.921527383	161.411736
3	4	49.7736	4.7202	CHARLEVILLE-MEZIERES	110.688212638	211.147052657
3	4	49.8179	4.7438	NOUZONVILLE	105.586285089	211.711853501
3	4	49.8539	4.7331	BOGNY-SUR-MEUSE	102.592275192	213.235732536
3	4	49.9727	8.5615	MORFELDEN-WALLDORF	228.949418816	107.386785249
3	4	49.9936	4.7069	FUMAY	91.0662177067	219.516174708
3	4	50.3535	7.5928	KOBLENZ	150.570642244	100.897188742
3	4	50.7988	7.208	SIEGBURG	121.072652337	80.3167524129
3	4	50.8121	8.7291	MARBURG	227.881123556	83.6015101855
3	4	50.9326	7.2847	OVERATH	129.328749009	74.1269273206
3	4	50.9872	7.4094	ENGELSKIRCHEN	139.377705052	72.6076310765
3	4	51.36	7.4942	HAGEN	161.049046875	58.8611251691
3	4	51.4536	6.6247	MOERS	120.385726524	39.8471207269
3	4	51.9607	7.6248	MUNSTER	208.886636526	43.9664383218
3	4	52.0308	7.1041	LEGDEN	191.365802878	34.7448163951
4	4	49.3298	6.0604	HAYANGE	149.601216898	164.632074535
4	4	49.701	4.9445	SEDAN	110.876227335	201.789461245
4	4	49.7486	4.7541	VILLERS-SEMEUSE	111.896646891	209.345915848
4	4	49.7978	4.6744	DAMOUZY	110.124810088	213.337129637
4	4	49.885	4.7308	MONTHERME	99.7885099897	214.386869301
4	4	49.9887	6.1607	GEMUND	84.6912182886	146.855462467
4	4	50.1019	4.808	CHOOZ	77.1695303441	220.954623544
4	4	50.1831	5.5778	LA ROCHE-EN-ARDENNE	49.6902447921	174.821003249
4	4	50.2653	4.4589	CHASTRES	85.1745706711	242.134531114
4	4	50.2798	7.5441	WALDESCH	149.212790045	104.26082072
4	4	50.2817	5.7169	MANHAY	41.1035595363	159.506078818
4	4	50.2864	5.7972	LIERNEUX	42.9593812141	152.084622071
4	4	50.2886	5.9175	VIELSALM	47.3530056756	142.716609049
4	4	50.2981	5.1017	CINEY	46.9881750932	218.808246237
4	4	50.3271	7.2247	MAYEN	125.887661673	104.75856748
4	4	50.3731	5.0236	ASSESSE	44.9386827044	231.068594427
4	4	50.3889	5.2411	HAVELANGE	32.9380762337	216.254341493
4	4	50.4	5.6056	FERRIERES	26.1639099321	165.747141665
4	4	50.404	5.931	STAVELOT	38.6189070795	130.021056369
4	4	50.4075	4.5886	AISEAU-PRESLES	70.1314650526	249.88633149
4	4	50.4125	5.3578	CLAVIER	26.4375792812	205.002055514
4	4	50.4147	6.1142	WAIMES	48.6691005178	118.946266373
4	4	50.4187	7.1194	KEMPENICH	116.13040555	100.94507719
4	4	50.4378	5.4689	OUFFET	21.4086911986	188.799572832
4	4	50.4392	7.4062	ANDERNACH	135.715288188	98.171229377
4	4	50.4431	5.3017	MODAVE	25.5289533954	216.406504938
4	4	50.4628	5.2417	MARCHIN	26.7015744517	226.615631249
4	4	50.4659	7.4894	NEUWIED	141.096252275	96.5791715126
4	4	50.4761	5.3694	TINLOT	19.7989384285	211.467896457
4	4	50.4761	5.5758	COMBLAIN-AU-PONT	17.4380705507	165.6704276
4	4	50.4819	5.5228	ANTHISNES	16.2615237221	178.049008816
4	4	50.4914	5.6442	ROUVREUX	17.7402018421	148.881399532
4	4	50.492	5.869	SPA	29.2932217195	120.957891228
4	4	50.5031	5.6661	SPRIMONT	17.5399406687	142.326368241
4	4	50.5083	5.3706	VILLERS-LE-TEMPLE	16.7916771008	217.591146946
4	4	50.5094	5.5819	POULSEUR	14.0185945409	160.213254095
4	4	50.5175	5.2386	HUY	23.1188341551	237.987197608
4	4	50.5236	4.6022	SOMBREFFE	65.693166886	260.170373159
4	4	50.5281	5.8247	THEUX	24.591028375	116.746484666
4	4	50.5292	5.3825	YERNEE-FRAINEUX	14.4524542261	220.546339569
4	4	50.5297	5.4125	SAINT-SEVERIN	13.1256529141	213.62165826
4	4	50.5364	5.6272	DOLEMBREUX	12.9220010597	142.006585518
4	4	50.5389	5.8828	POLLEUR	27.8710692864	110.689278215
4	4	50.5411	5.2869	AMPSIN	18.826024212	239.192273629
4	4	50.5456	5.3375	OMBRET-RAWSA	15.5574679598	233.969514614
4	4	50.5489	5.3178	AMAY	16.5059889709	237.862012188
4	4	50.5572	4.9919	FERNELMONT	37.8689909225	258.198455912
4	4	50.5631	4.6964	GEMBLOUX	58.4095324507	263.216414359
4	4	50.5681	7.2848	LINZ AM RHEIN	125.480213023	92.3598698299
4	4	50.5692	5.8039	PEPINSTER	21.4749497201	107.621524485
4	4	50.5767	5.2622	VILLERS-LE-BOUILLET	18.7849981614	252.412490529
4	4	50.5794	5.8181	WEGNEZ	22.1282202301	104.024307114
4	4	50.5864	5.3042	JEHAY	15.623332968	252.85203436
4	4	50.6044	5.7814	XHENDELESSE	19.0364006794	97.8238801655
4	4	50.6078	5.3181	VERLAINE	14.1151426297	260.91590368
4	4	50.6083	5.8139	GRAND-RECHAIN	21.2670320226	95.7989703577
4	4	50.6094	5.0172	WASSEIGES	35.290675179	266.831250634
4	4	50.6111	5.855	DISON	24.1351729651	94.3360743371
4	4	50.6222	5.2575	AINEFFE	18.2325891646	268.07157531
4	4	50.631	6.035	EUPEN	36.7941711927	89.2793279604
4	4	50.6322	5.8353	CHAINEUX	22.6674179692	88.6951527837
4	4	50.6375	4.9167	RAMILLIES	42.3430256851	271.661384821
4	4	50.6433	4.5703	COURT-SAINT-ETIENNE	66.8549844733	271.82393902
4	4	50.6481	5.3217	DONCEEL	13.8561030309	279.361103293
4	4	50.6492	3.7183	MAINVAULT	127.120187586	271.757483468
4	4	50.6495	6.8069	EUSKIRCHEN	91.4209081371	88.0015469794
4	4	50.6497	5.2708	VIEMME	17.4428394389	278.04915642
4	4	50.6503	5.7061	EVEGNEE-TIGNEE	13.7442778306	79.5279293017
4	4	50.6544	5.2458	FAIMES	19.2677017086	278.871214866
4	4	50.6614	5.3103	LIMONT	14.9480413378	284.471356374
4	4	50.6619	5.7636	BOLLAND	17.9838120567	77.7995298659
4	4	50.6667	4.5692	OTTIGNIES-LOUVAIN-LA-NEUVE	67.0329017741	274.047802933
4	4	50.6694	5.1717	GEER	24.7132678542	280.872735056
4	4	50.6717	5.0786	HANNUT	31.2447037397	279.119491589
4	4	50.6761	6.1122	RAEREN	42.5722945873	82.5488284739
4	4	50.6933	4.8003	INCOURT	51.0545608992	278.45609122
4	4	50.695	4.2061	TUBIZE	92.8470743039	275.110220665
4	4	50.6956	5.7547	SAINT-ANDRE	18.54178524	65.9806604183
4	4	50.6958	5.7281	TREMBLEUR	16.8498172581	63.3270092879
4	4	50.6986	5.2158	BERLOZ	22.5655579387	290.483003005
4	4	50.6989	5.3408	HODEIGE	14.6255285362	302.700993076
4	4	50.7047	4.99	ORP-JAUCHE	38.0854121243	283.148726463
4	4	50.7094	6.3614	HURTGENWALD	60.5183541896	81.0676318919
4	4	50.7108	5.7558	MORTROUX	19.355527451	61.4905227056
4	4	50.714	5.726	DALHEM	17.7205206799	57.243535476
4	4	50.7164	5.3986	CRISNEE	12.8222760305	320.124017194
4	4	50.7189	7.1133	BONN	113.432014876	84.2678135833
4	4	50.7222	5.5725	FEXHE-SLINS	11.2396407067	21.1775447313
4	4	50.7261	4.8694	JODOIGNE	46.92004684	283.698772409
4	4	50.7311	5.7453	BOMBAYE	19.9123084084	54.7427942545
4	4	50.7433	5.7317	BERNEAU	19.9760424998	49.9690976405
4	4	50.7483	5.4433	RUTTEN	14.3095324186	339.29015782
4	4	50.7531	3.9728	GALMAARDEN	109.860279343	277.873493023
4	4	50.755	5.146	GINGELOM	29.65572868	298.592700698
4	4	50.7569	5.0819	LANDEN	33.7958537472	295.272935312
4	4	50.7592	4.1617	PEPINGEN	96.7288117469	279.201315474
4	4	50.7667	4.9919	HELECINE	40.0500455107	292.861515858
4	4	50.7689	5.5233	MAL	15.6850334636	2.13937985522
4	4	50.7819	4.7747	BEAUVECHAIN	55.0269666239	288.413132947
4	4	50.7831	7.7345	WISSEN	157.728197539	82.8620479996
4	4	50.7853	5.4194	PIRINGEN	18.7563584736	338.934050738
4	4	50.7906	4.5853	HULDENBERG	68.1147619607	285.759121704
4	4	50.8097	5.6039	RIEMST	21.1654050741	17.2206732404
4	4	50.8261	6.9016	BRUHL	100.353910049	76.7788324443
4	4	50.8347	5.1044	ZOUTLEEUW	37.0012696149	308.579829041
4	4	50.8422	5.3381	WELLEN	26.9026068269	332.409157115
4	4	50.8511	5.4903	HOESELT	24.8795468347	355.990947526
4	4	50.8653	5.1947	NIEUWERKERKEN (LIMBURG)	34.75498069	319.54812245
4	4	50.8687	6.0538	KERKRADE	46.5079000747	54.6405376258
4	4	50.8688	6.0967	HERZOGENRATH	49.0205085972	56.6511491764
4	4	50.8825	4.8428	LUBBEEK	55.2408834712	301.09093389
4	4	50.8872	4.5436	KORTENBERG	74.3618578884	293.190437163
4	4	50.8908	5.1167	GEETBETS	40.5525079494	316.283850754
4	4	50.904	5.412	DIEPENBEEK	31.5514771011	346.724466465
4	4	50.9122	4.1981	ASSE	98.1300937608	289.303723945
4	4	50.9328	5.5725	ZUTENDAAL	34.14884537	6.79806363869
4	4	50.9404	6.9696	KOLN	108.307102492	70.7222103206
4	4	50.9456	4.9747	BEKKEVOORT	51.9613032971	313.04863751
4	4	50.9478	5.1167	HALEN	45.3267234407	321.863220223
4	4	50.9617	5.7028	MAASMECHELEN	39.4130233155	19.558146214
4	4	50.9688	6.6643	BERGHEIM	89.456763004	64.4808930018
4	4	50.9867	5.1917	LUMMEN	45.9521644618	330.394587196
4	4	50.991	5.069	DIEST	51.1752160118	322.272810519
4	4	51.0347	5.7294	DILSEN	47.6981494415	18.3789654395
4	4	51.0447	5.5853	OPGLABBEEK	46.6196190108	6.07059081089
4	4	51.0798	6.3182	ERKELENZ	75.6637991298	48.0637703089
4	4	51.096	5.796	MAASEIK	55.6951131256	20.6979804908
4	4	51.0972	5.5219	MEEUWEN-GRUITRODE	52.1987164112	0.530562688844
4	4	51.1031	5.1486	HAM	58.8112701435	334.127391009
4	4	51.1275	5.3664	HECHTEL-EKSEL	56.5430061545	349.398225098
4	4	51.1456	5.7425	KINROOI	59.764886304	15.4489267394
4	4	51.1722	5.1708	BALEN	65.2028465903	338.333829162
4	4	51.1733	5.5797	BOCHOLT	60.8331474783	4.26573899435
4	4	51.1835	7.2006	REMSCHEID	133.698548796	61.8185725332
4	4	51.1856	5.1181	MOL	68.0234256351	335.923599728
4	4	51.1962	6.0071	ROERMOND	72.0645728457	28.5112637683
4	4	51.2222	6.8073	DUSSELDORF	112.360801542	53.4635630378
4	4	51.2297	5.3169	LOMMEL	68.3707586787	348.323190465
4	4	51.2328	4.5844	SCHILDE	93.8448891257	316.162858635
4	4	51.2411	5.1139	DESSEL	73.8035264986	337.695546936
4	4	51.2575	7.18	WUPPERTAL	136.371654413	58.4578261327
4	4	51.2686	5.0864	RETIE	77.3684036397	337.254880407
4	4	51.2914	4.4942	BRASSCHAAT	102.907771124	316.215112832
4	4	51.3843	7.1873	HATTINGEN	144.410843809	53.7186184404
4	4	51.4459	6.7477	DUISBURG	125.51655195	43.0608575028
4	4	51.4482	7.0071	ESSEN	138.84307631	48.3375510086
4	4	51.4493	5.4748	EINDHOVEN	91.4123057296	358.248053306
4	4	51.5057	7.4602	DORTMUND	167.699448219	53.6392632314
4	4	51.5544	6.929	BOTTROP	142.947934655	43.3186541445
4	4	51.7054	5.3162	'S-HERTOGENBOSCH	120.666067262	353.46002875
4	5	50.265	4.926	DINANT	58.1440436779	226.242738047
4	5	50.7608	6.1187	AACHEN	45.1416756438	70.6642160888
4	5	50.8494	5.6928	MAASTRICHT	27.6428995004	26.934682037
5	5	50.4075	5.8089	STOUMONT	32.1886795856	139.528406878
5	5	50.4875	5.1022	ANDENNE	33.165620171	242.044310726
5	5	50.5072	5.42	NANDRIN	15.0291283509	206.641563118
5	5	50.5306	5.7119	LOUVEIGNE	17.6606462426	127.766856836
5	5	50.5447	5.6911	GOMZE-ANDOUMONT	15.5370636487	126.544503222
5	5	50.5503	5.0989	HERON	30.7079295958	253.812844989
5	5	50.5583	5.3625	HERMALLE-SOUS-HUY	13.2937400175	234.380088415
5	5	50.5683	5.3931	CLERMONT-SOUS-HUY	10.8901040246	232.470238753
5	5	50.5683	5.3931	EHEIN	10.8901040246	232.470238753
5	5	50.5775	5.8678	HEUSY	25.6005468061	102.539475178
5	5	50.582	5.843	ENSIVAL	23.7769158139	102.301169795
5	5	50.586	4.072	SOIGNIES	102.253726148	267.938941728
5	5	50.5914	5.7508	OLNE	17.180477321	103.617165535
5	5	50.5919	5.8339	LAMBERMONT	22.9276122351	99.9641776408
5	5	50.5928	5.7922	SOIRON	20.0081863315	101.178689652
5	5	50.594	5.861	VERVIERS	24.7812258154	98.6452313833
5	5	50.5942	5.8997	STEMBERT	27.4884978607	97.7129959781
5	5	50.6014	5.3575	SAINT-GEORGES-SUR-MEUSE	11.5334874825	255.194958735
5	5	50.6092	5.7161	AYENEUX	14.3850005288	98.2817103984
5	5	50.6128	5.7492	SOUMAGNE	16.6600988726	95.7345563894
5	5	50.6136	5.9417	LIMBOURG	30.2392550846	92.871632395
5	5	50.6261	5.7172	MICHEROUX	14.3090129521	90.7681907476
5	5	50.6272	5.1508	BRAIVES	25.7702306215	269.942910323
5	5	50.6403	5.7961	HERVE	19.9343419432	85.9555463266
5	5	50.6453	5.6672	BELLAIRE	10.9379460218	79.807527882
5	5	50.6483	5.8231	BATTICE	21.9123489182	83.965737452
5	5	50.6536	5.6831	SAIVE	12.2273548973	76.4670213635
5	5	50.6544	5.4517	BIERSET	5.35484767689	303.284013897
5	5	50.6544	5.8656	THIMISTER-CLERMONT	24.9738853557	83.1112357022
5	5	50.666	5.992	WELKENRAEDT	34.0014569245	82.6739466667
5	5	50.6689	5.6981	BARCHON	13.7260666908	70.5712086132
5	5	50.6697	5.8061	CHARNEUX	21.1044961562	77.1901880233
5	5	50.6797	5.6947	HOUSSE	13.9489489621	65.5809590133
5	5	50.68	5.3289	REMICOURT	14.3758579762	293.799011716
5	5	50.6844	5.7256	BLEGNY	16.1602357385	67.0736421309
5	5	50.6867	5.3736	MOMALLE	11.9422356512	303.201684649
5	5	50.6867	5.7728	JULEMONT	19.3641207776	70.1930192624
5	5	50.6883	5.5544	VOROUX-LEZ-LIERS	7.26345229739	22.5399296498
5	5	50.6961	5.3036	POUSSET	16.7574344627	296.958405201
5	5	50.6967	5.7022	SAINT-REMY (LIEGE)	15.2839929025	59.92628019
5	5	50.7039	5.8603	AUBEL	25.8316947424	70.7884488913
5	5	50.704	5.263	WAREMME	19.7206552847	295.482928869
5	5	50.705	5.715	FENEUR	16.5320171442	58.7162415773
5	5	50.7072	5.6508	OUPEYE	13.0306407849	47.4058381217
5	5	50.7094	5.62	HERMEE	11.7088594845	39.3033834398
5	5	50.7103	5.545	VILLERS-SAINT-SIMEON	9.39765848244	13.0313180738
5	5	50.7108	5.6819	HERMALLE-SOUS-ARGENTEAU	14.9685312297	51.9583940852
5	5	50.7114	5.6906	ARGENTEAU	15.4977819894	53.159637676
5	5	50.7117	5.5294	JUPRELLE	9.36643682066	6.23402321495
5	5	50.7164	5.6939	RICHELLE	16.0200149163	52.0628736673
5	5	50.7186	6.0172	KELMIS	36.9031056689	73.9566138876
5	5	50.7206	5.7772	NEUFCHATEAU (LIEGE)	21.2045694721	60.8342774902
5	5	50.7264	5.565	SLINS	11.5026166646	17.8742580227
5	5	50.7283	5.4269	HERSTAPPE	12.7776529894	330.867965619
5	5	50.7294	5.3581	OREYE	15.8184434753	315.547408033
5	5	50.7325	5.6311	HEURE-LE-ROMAIN	14.2292566982	35.1730069485
5	5	50.7353	5.7703	WARSAGE	21.6345494656	56.4160067527
5	5	50.7397	5.6117	HOUTAIN-SAINT-SIMEON	14.1811427238	28.773312802
5	5	50.7406	5.6975	VISE	17.9791783692	45.7675965646
5	5	50.7533	5.4986	VREREN	13.9867584552	355.253622844
5	5	50.7569	5.6811	LIXHE	18.5300265007	39.2364702313
5	5	50.7611	5.7433	VOEREN	21.8961369546	47.3636517494
5	5	50.7667	5.5319	SLUIZEN	15.4754643775	4.41863655226
5	5	50.781	5.467	TONGEREN	17.3546038374	348.751298689
5	5	50.7825	5.6967	LANAYE	21.4509548569	36.6827814022
5	5	50.8022	5.3458	BORGLOON	22.7668384037	328.404780656
5	5	50.8167	5.1878	SINT-TRUIDEN	31.2170652026	312.381979477
5	5	50.87	5.53	BILZEN	26.9417254423	2.24612823945
5	5	50.8903	5.6533	LANAKEN	30.7677442101	18.4381425962
6	6	50.545	5.4667	NEUPRE	9.84620759753	200.34716949
6	6	50.575	5.5369	BONCELLES	6.09621502944	165.257553412
6	6	50.5833	5.4058	ENGIS	9.19152552931	237.291621356
6	6	50.6028	5.6847	MAGNEE	12.3335541405	103.071872736
6	6	50.6108	5.6678	ROMSEE	10.9816832744	99.9748235807
6	6	50.6231	5.685	FLERON	12.0417418793	92.5287278463
6	6	50.6239	5.6558	BEYNE-HEUSAY	9.97352266498	92.5666238736
6	6	50.6342	5.7003	RETINNE	13.1286291665	86.9170322314
6	6	50.6375	5.6808	QUEUE-DU-BOIS	11.7779171102	84.7880397075
6	6	50.6653	5.4636	AWANS	5.51666494028	318.796017582
6	6	50.6667	5.3989	FEXHE-LE-HAUT-CLOCHER	9.27164238411	297.71135961
6	6	50.6708	5.6411	HERSTAL	10.1097736758	61.8556612146
6	6	50.6731	5.5872	VOTTEM	7.15849144834	45.4772313081
6	6	50.6744	5.5147	ALLEUR	5.16165337023	359.764602931
6	6	50.6811	5.4372	FOOZ	8.07229821346	317.063662147
6	6	50.6819	5.4553	HOGNOUL	7.33312876497	324.873214354
6	6	50.6828	5.7456	MORTIER	17.4093671975	69.4138408532
6	6	50.6836	5.6681	CHERATTE	12.4687424777	60.2022489785
6	6	50.6886	5.5261	LANTIN	6.78678905877	6.63692133928
6	6	50.6978	5.6533	VIVEGNIS	12.4863741857	51.4950311995
6	6	50.7053	5.4403	VILLERS-L'EVEQUE	10.0913008705	328.471862266
6	6	50.7156	5.4711	OTHEE	10.2270214028	342.352169849
6	6	50.7269	5.5092	WIHOGNE	11.0094786375	357.868211413
6	6	50.7306	5.5261	PAIFVE	11.4403754914	3.92799967855
6	6	50.7347	5.6681	HACCOURT	16.0615539707	42.2942565168
6	6	50.7483	5.9583	PLOMBIERES	34.0653966583	66.696975009
6	6	50.7625	5.5106	NEREM	14.965337046	358.811358539
6	6	50.8158	5.5361	ELDEREN	20.9444924476	4.07134810707
7	7	50.6058	5.4842	FLEMALLE	3.29399324395	221.446405012
7	7	50.6161	5.5139	SERAING	1.32605503247	183.365779874
7	7	50.6203	5.5264	TILLEUR	1.1766290122	136.712473714
7	7	50.635	5.5358	SAINT-NICOLAS	1.66496254883	62.1074231779
7	7	50.6414	5.5169	MONTEGNEE	1.49668156056	5.15206464492
7	7	50.6436	5.5022	GRACE-HOLLOGNE	1.95742249654	332.448533297
7	7	50.6458	5.5297	GLAIN	2.23657123426	27.7026113182
7	7	50.648	5.576	LIEGE	4.85505921514	62.7022368907
7	7	50.6536	5.5422	ANS	3.43685004569	34.0341272133
7	7	50.6542	5.3561	JENEFFE (LIEGE)	11.6119535524	284.597726169
7	7	50.6661	5.5044	LONCIN	4.30410148077	349.972640728
7	7	50.7611	5.6111	BASSENGE	16.2891093862	24.5989985524
